# Supplementary material for: Biosensor-integrated transposon mutagenesis reveals rv0158 as a coordinator of redox homeostasis in Mycobacterium tuberculosis
Source: eLife journal article supplement (doi:10.7554/elife.80218), 2023-08-29

# Batch Analysis Report

Run Date: 2/28/17 12:55 PM

Experiment: 31Jan2017 Bac sorting

User ID: Administrator

Statistics Output: N/A

Worksheet PDF Output: C:\Users\Admin\Desktop\31Jan2017 Bac sorting-Batch\_Analysis\_28022  
017125550.pdf

## SS RVMrx1

| Tube          | Status | Run Time         |
|---------------|--------|------------------|
| US            | OK     | 2/28/17 12:55 PM |
| CHP           | OK     | 2/28/17 12:55 PM |
| CHP_001       | OK     | 2/28/17 12:55 PM |
| UT            | OK     | 2/28/17 12:55 PM |
| UT_001        | OK     | 2/28/17 12:55 PM |
| DTT           | OK     | 2/28/17 12:56 PM |
| DTT_001       | OK     | 2/28/17 12:56 PM |
| TN lib ox     | OK     | 2/28/17 12:56 PM |
| TN lib ox_001 | OK     | 2/28/17 12:56 PM |
| Post Sort     | OK     | 2/28/17 12:56 PM |

## KA RVMrx1

| Tube    | Status | Run Time         |
|---------|--------|------------------|
| CHP     | OK     | 2/28/17 12:56 PM |
| CHP_001 | OK     | 2/28/17 12:56 PM |
| UT      | OK     | 2/28/17 12:56 PM |
| UT_001  | OK     | 2/28/17 12:56 PM |
| DTT     | OK     | 2/28/17 12:56 PM |
| DTT_001 | OK     | 2/28/17 12:56 PM |

## PP RVMrx1\_001

| Tube    | Status | Run Time         |
|---------|--------|------------------|
| CHP     | OK     | 2/28/17 12:56 PM |
| CHP_001 | OK     | 2/28/17 12:56 PM |
| UT      | OK     | 2/28/17 12:56 PM |
| UT_001  | OK     | 2/28/17 12:56 PM |
| DTT     | OK     | 2/28/17 12:56 PM |
| DTT_001 | OK     | 2/28/17 12:56 PM |

**SC RVMrx1\_002**

| Tube    | Status | Run Time         |
|---------|--------|------------------|
| CHP     | OK     | 2/28/17 12:56 PM |
| CHP_001 | OK     | 2/28/17 12:56 PM |
| UT      | OK     | 2/28/17 12:56 PM |
| UT_001  | OK     | 2/28/17 12:56 PM |
| DTT     | OK     | 2/28/17 12:56 PM |
| DTT_001 | OK     | 2/28/17 12:56 PM |

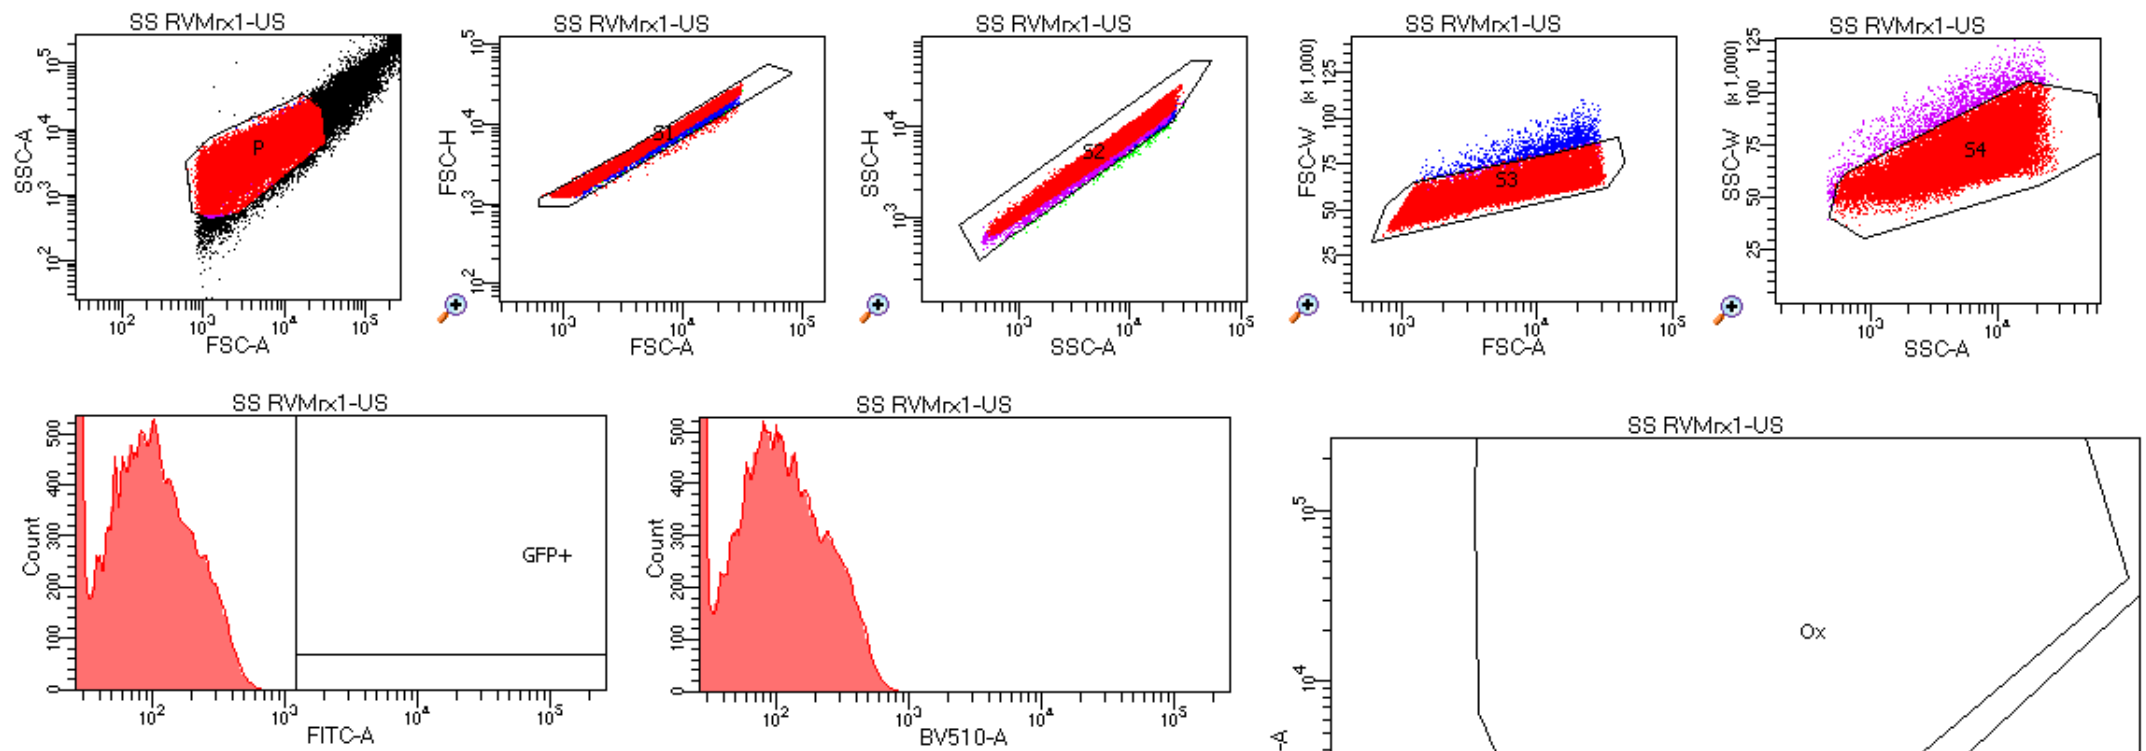

| Tube: US   |         |         |        |
|------------|---------|---------|--------|
| Population | #Events | %Parent | %Total |
| All Events | 41,630  | ####    | 100.0  |
| P          | 32,648  | 78.4    | 78.4   |
| S1         | 32,439  | 99.4    | 77.9   |
| S2         | 32,214  | 99.3    | 77.4   |
| S3         | 31,016  | 96.3    | 74.5   |
| S4         | 29,632  | 95.5    | 71.2   |
| GFP+       | 2       | 0.0     | 0.0    |
| Ox         | 2       | 100.0   | 0.0    |
| Red        | 0       | 0.0     | 0.0    |

|                  |                                    |  |  |  |
|------------------|------------------------------------|--|--|--|
| Experiment Name: | 31Jan2017 Bac sorting              |  |  |  |
| Specimen Name:   | SS RVMrx1                          |  |  |  |
| Tube Name:       | US                                 |  |  |  |
| Record Date:     | Jan 31, 2017 2:44:47 PM            |  |  |  |
| \$OP:            | Administrator                      |  |  |  |
| GUID:            | 15f29c7e-7aea-4d68-8a82-41ae478... |  |  |  |

  

| Population                                                                             | #Events | %Parent | FITC-A<br>Median | BV510-A<br>Median |
|----------------------------------------------------------------------------------------|---------|---------|------------------|-------------------|
|  S4   | 29,632  | 95.5    | 80               | 94                |
|  GFP+ | 2       | 0.0     | 2,641            | 2,313             |
|  Ox   | 2       | 100.0   | 2,641            | 2,313             |
|  Red  | 0       | 0.0     | ####             | ####              |

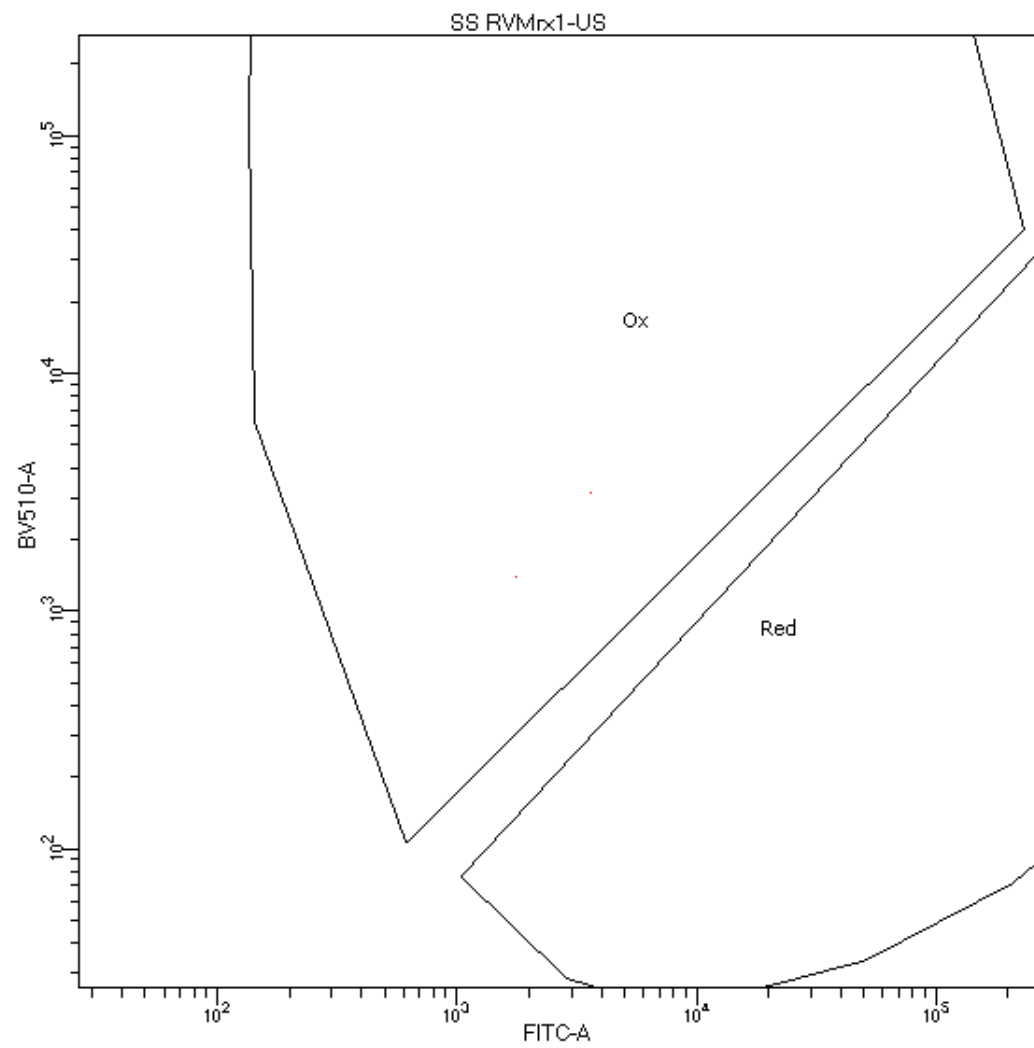

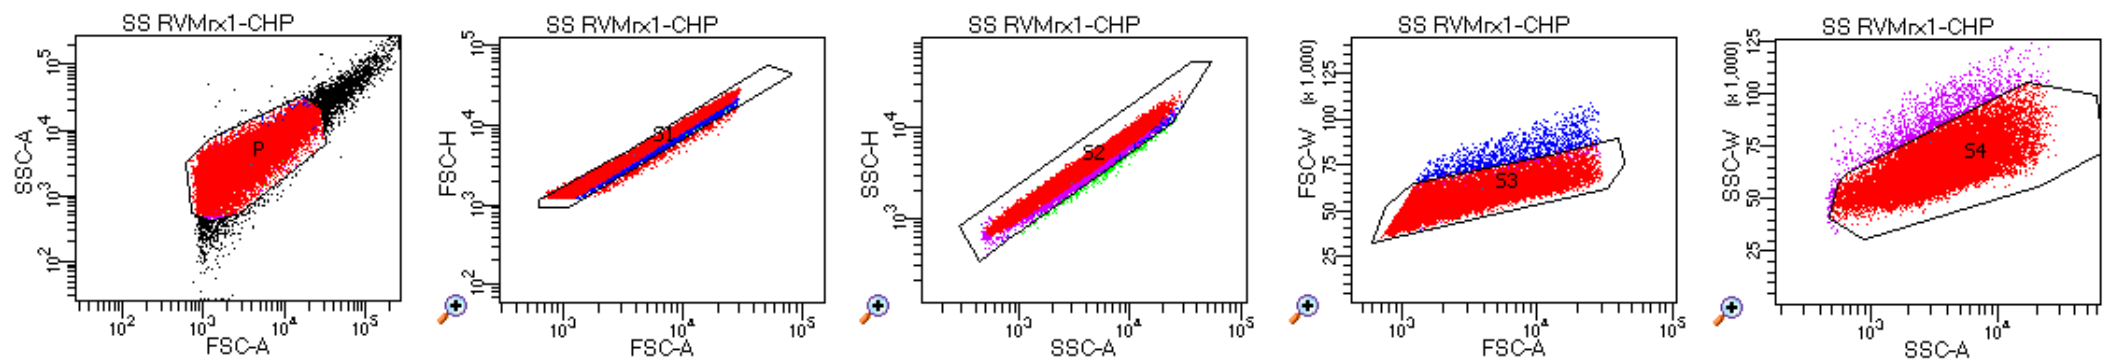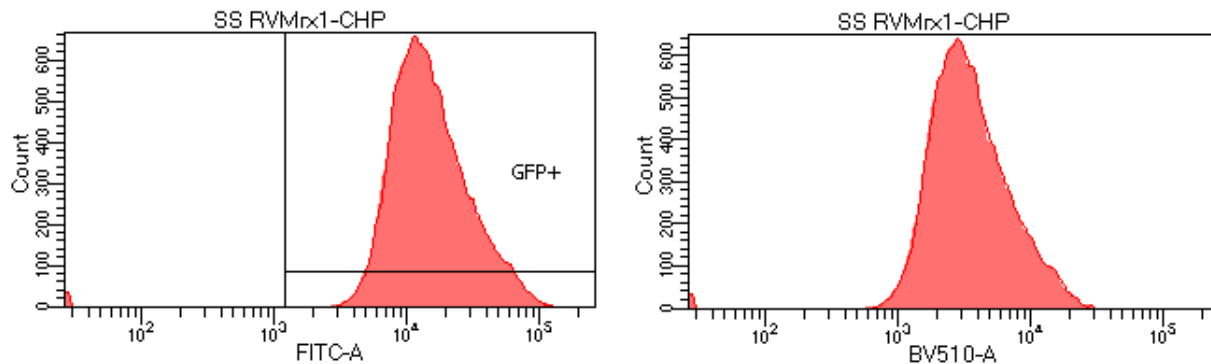

Tube: CHP

| Population | #Events | %Parent | %Total |
|------------|---------|---------|--------|
| All Events | 32,910  | ####    | 100.0  |
| P          | 30,737  | 93.4    | 93.4   |
| S1         | 30,263  | 98.5    | 92.0   |
| S2         | 29,975  | 99.0    | 91.1   |
| S3         | 28,940  | 96.5    | 87.9   |
| S4         | 27,728  | 95.8    | 84.3   |
| GFP+       | 27,559  | 99.4    | 83.7   |
| Ox         | 27,341  | 99.2    | 83.1   |
| Red        | 1       | 0.0     | 0.0    |

|                  |                                    |
|------------------|------------------------------------|
| Experiment Name: | 31Jan2017 Bac sorting              |
| Specimen Name:   | SS RVMrx1                          |
| Tube Name:       | CHP                                |
| Record Date:     | Jan 31, 2017 2:45:57 PM            |
| \$OP:            | Administrator                      |
| GUID:            | 11453805-9c55-41a4-b529-29bf8d5... |

| Population                                                                             | #Events | %Parent | FITC-A<br>Median | BV510-A<br>Median |
|----------------------------------------------------------------------------------------|---------|---------|------------------|-------------------|
|  S4   | 27,728  | 95.8    | 13,465           | 3,121             |
|  GFP+ | 27,559  | 99.4    | 13,518           | 3,135             |
|  Ox   | 27,341  | 99.2    | 13,584           | 3,156             |
|  Red  | 1       | 0.0     | 6,797            | 310               |

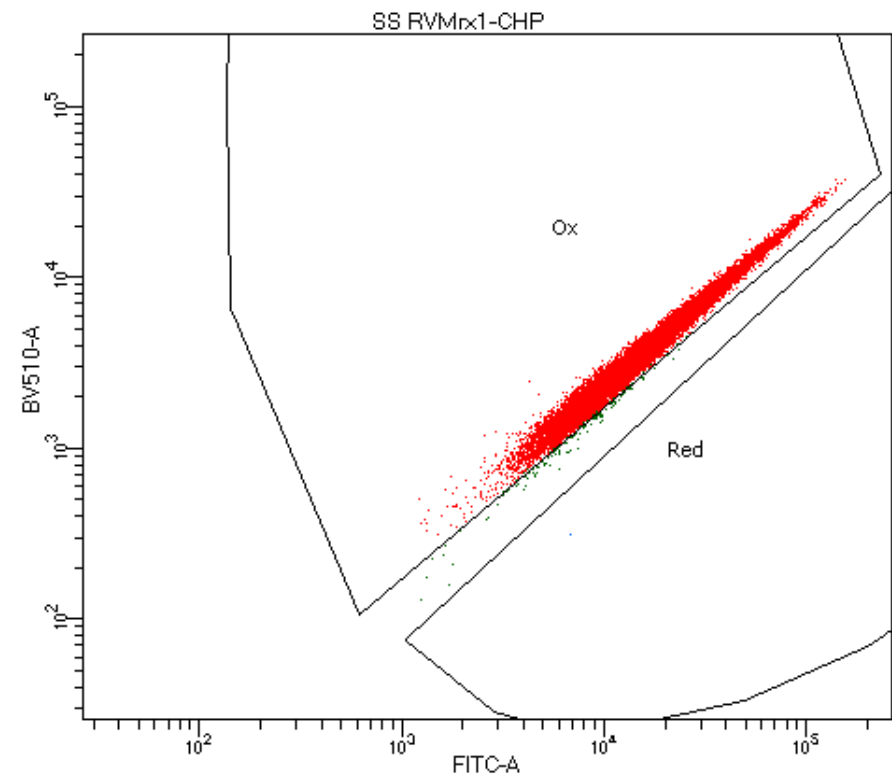

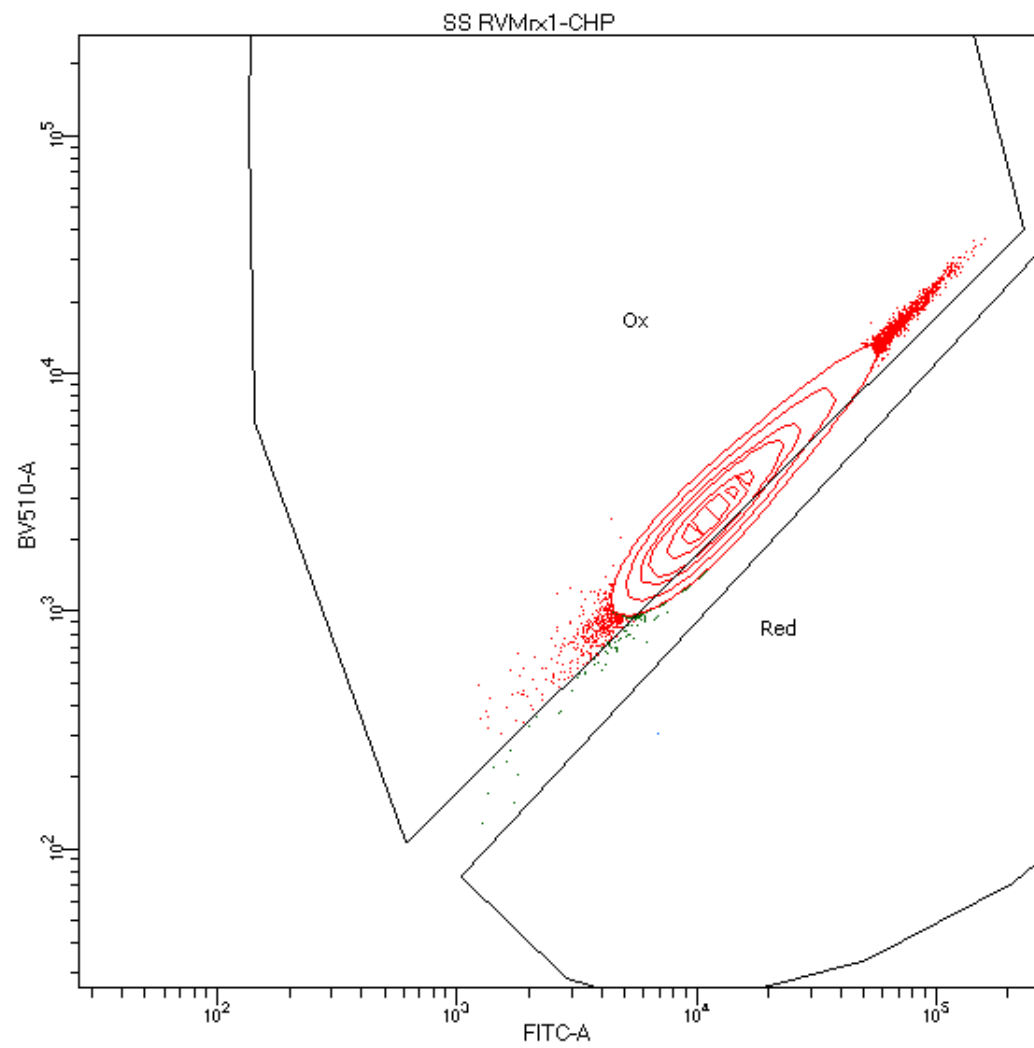

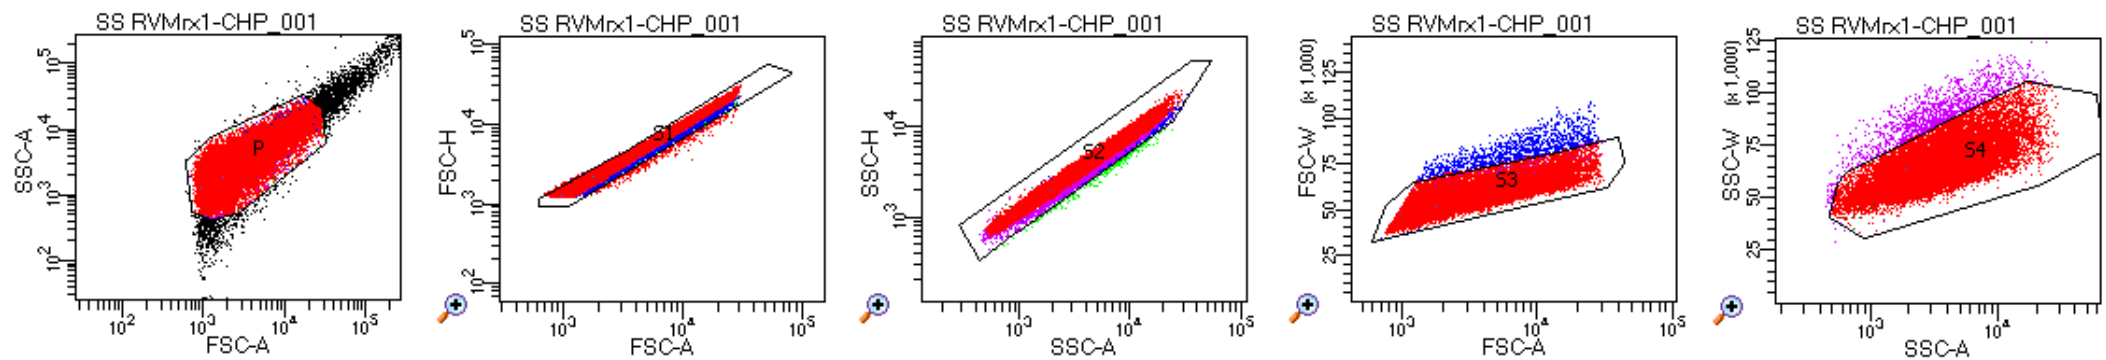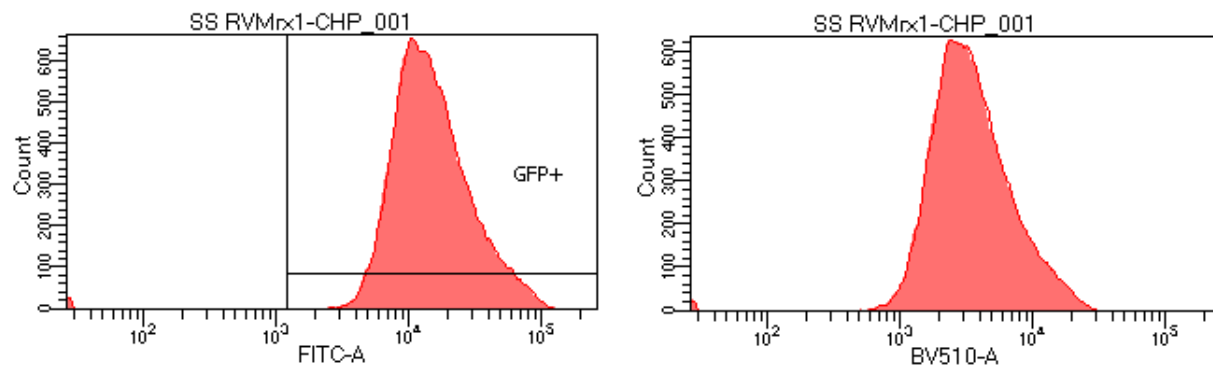

Tube: CHP\_001

| Population | #Events | %Parent | %Total |
|------------|---------|---------|--------|
| All Events | 32,966  | ####    | 100.0  |
| P          | 30,777  | 93.4    | 93.4   |
| S1         | 30,317  | 98.5    | 92.0   |
| S2         | 30,041  | 99.1    | 91.1   |
| S3         | 28,935  | 96.3    | 87.8   |
| S4         | 27,661  | 95.6    | 83.9   |
| GFP+       | 27,514  | 99.5    | 83.5   |
| Ox         | 27,227  | 99.0    | 82.6   |
| Red        | 2       | 0.0     | 0.0    |

|                  |                                    |
|------------------|------------------------------------|
| Experiment Name: | 31Jan2017 Bac sorting              |
| Specimen Name:   | SS RVMrx1                          |
| Tube Name:       | CHP_001                            |
| Record Date:     | Jan 31, 2017 2:46:30 PM            |
| \$OP:            | Administrator                      |
| GUID:            | 91490226-8fc7-4d50-b4ed-66faae9... |

| Population                                                                               | #Events | %Parent | FITC-A<br>Median | BV510-A<br>Median |
|------------------------------------------------------------------------------------------|---------|---------|------------------|-------------------|
|  S4   | 27,661  | 95.6    | 13,494           | 3,131             |
|  GFP+ | 27,514  | 99.5    | 13,548           | 3,144             |
|  Ox   | 27,227  | 99.0    | 13,630           | 3,163             |
|  Red  | 2       | 0.0     | 4,784            | 245               |

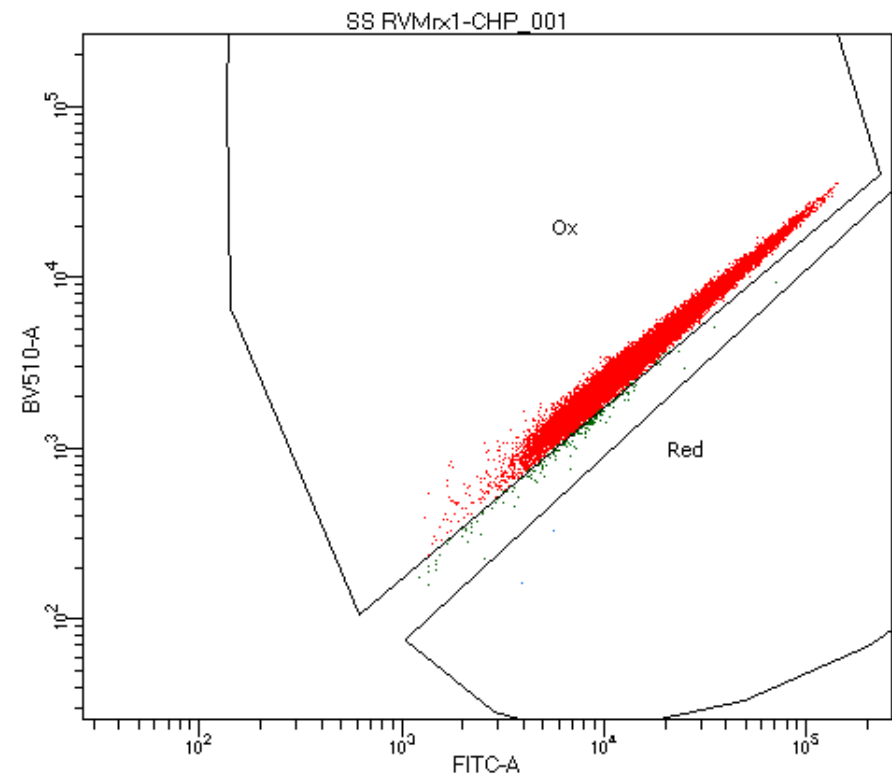

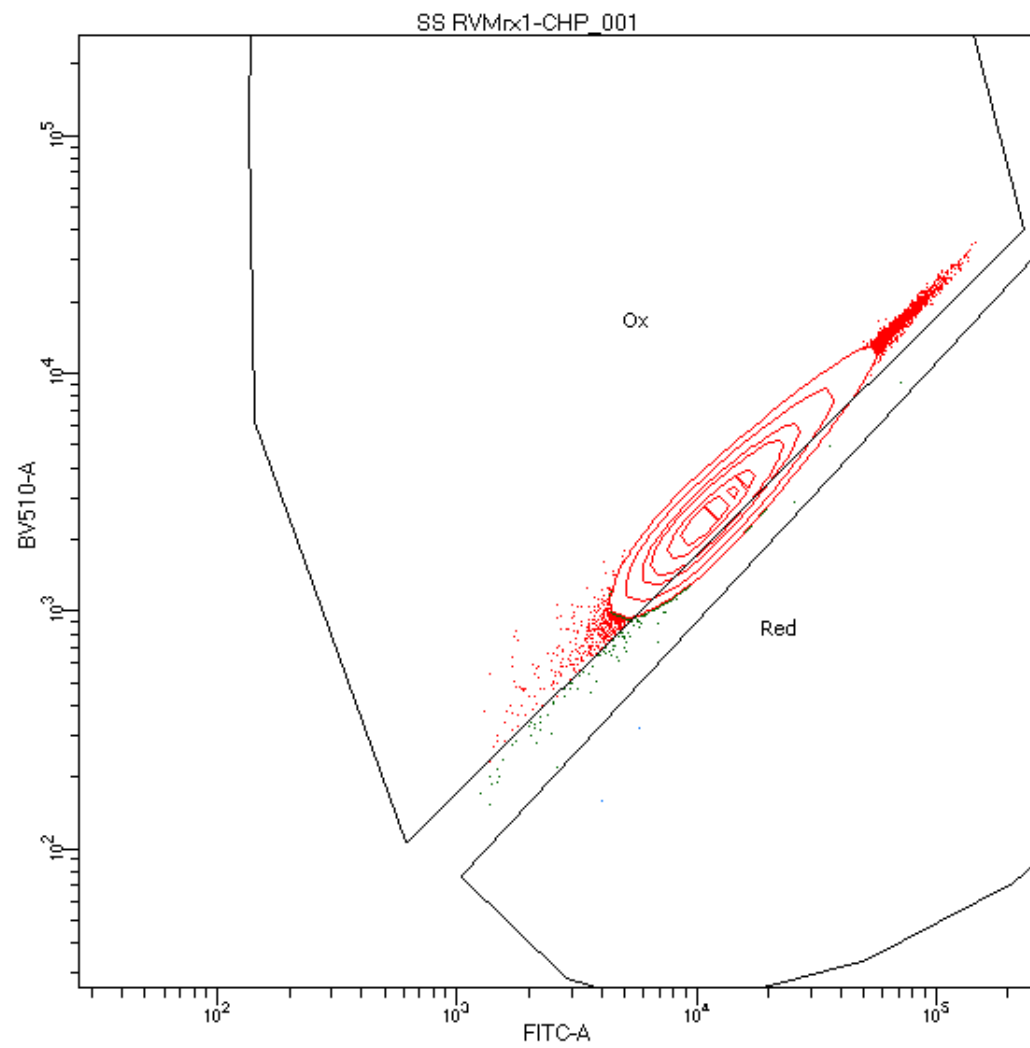



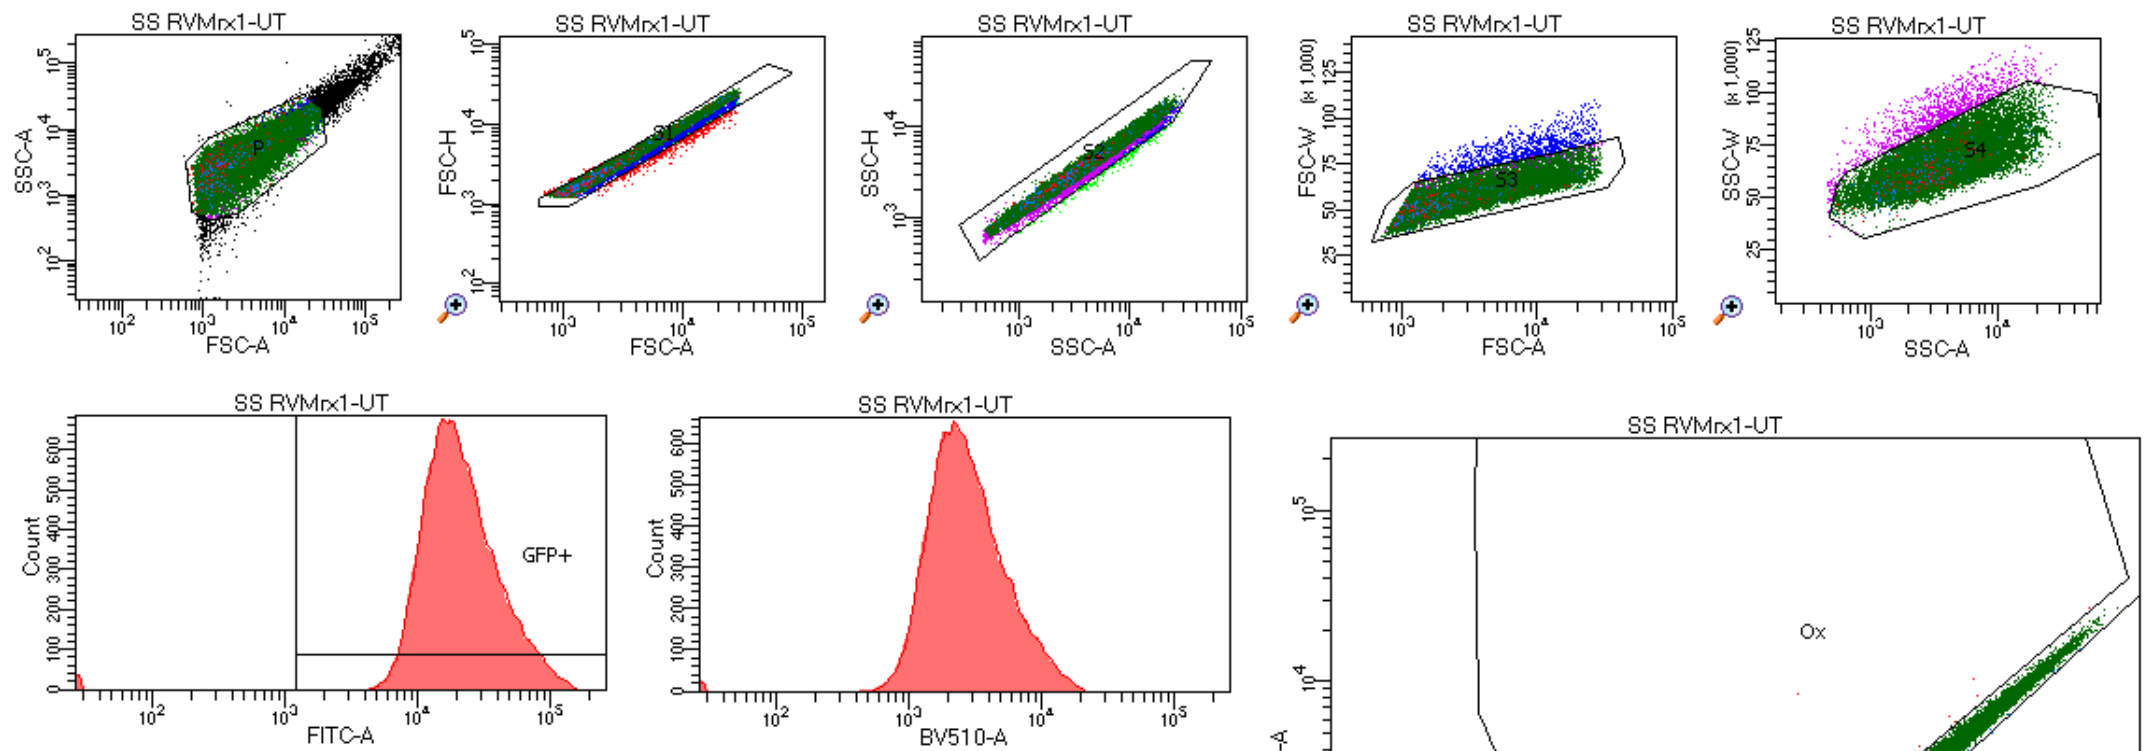

| Population | #Events | %Parent | %Total |
|------------|---------|---------|--------|
| All Events | 32,742  | ####    | 100.0  |
| P          | 30,702  | 93.8    | 93.8   |
| S1         | 30,201  | 98.4    | 92.2   |
| S2         | 29,905  | 99.0    | 91.3   |
| S3         | 28,966  | 96.9    | 88.5   |
| S4         | 27,872  | 96.2    | 85.1   |
| GFP+       | 27,716  | 99.4    | 84.6   |
| Ox         | 93      | 0.3     | 0.3    |
| Red        | 107     | 0.4     | 0.3    |

|                  |                                   |  |  |  |
|------------------|-----------------------------------|--|--|--|
| Experiment Name: | 31Jan2017 Bac sorting             |  |  |  |
| Specimen Name:   | SS RVMrx1                         |  |  |  |
| Tube Name:       | UT                                |  |  |  |
| Record Date:     | Jan 31, 2017 2:47:21 PM           |  |  |  |
| \$OP:            | Administrator                     |  |  |  |
| GUID:            | 8dd4070b-59cc-423c-a32e-18b687... |  |  |  |

  

| Population                                                                             | #Events | %Parent | FITC-A<br>Median | BV510-A<br>Median |
|----------------------------------------------------------------------------------------|---------|---------|------------------|-------------------|
|  S4   | 27,872  | 96.2    | 19,021           | 2,474             |
|  GFP+ | 27,716  | 99.4    | 19,102           | 2,484             |
|  Ox   | 93      | 0.3     | 8,456            | 1,615             |
|  Red  | 107     | 0.4     | 11,683           | 1,086             |

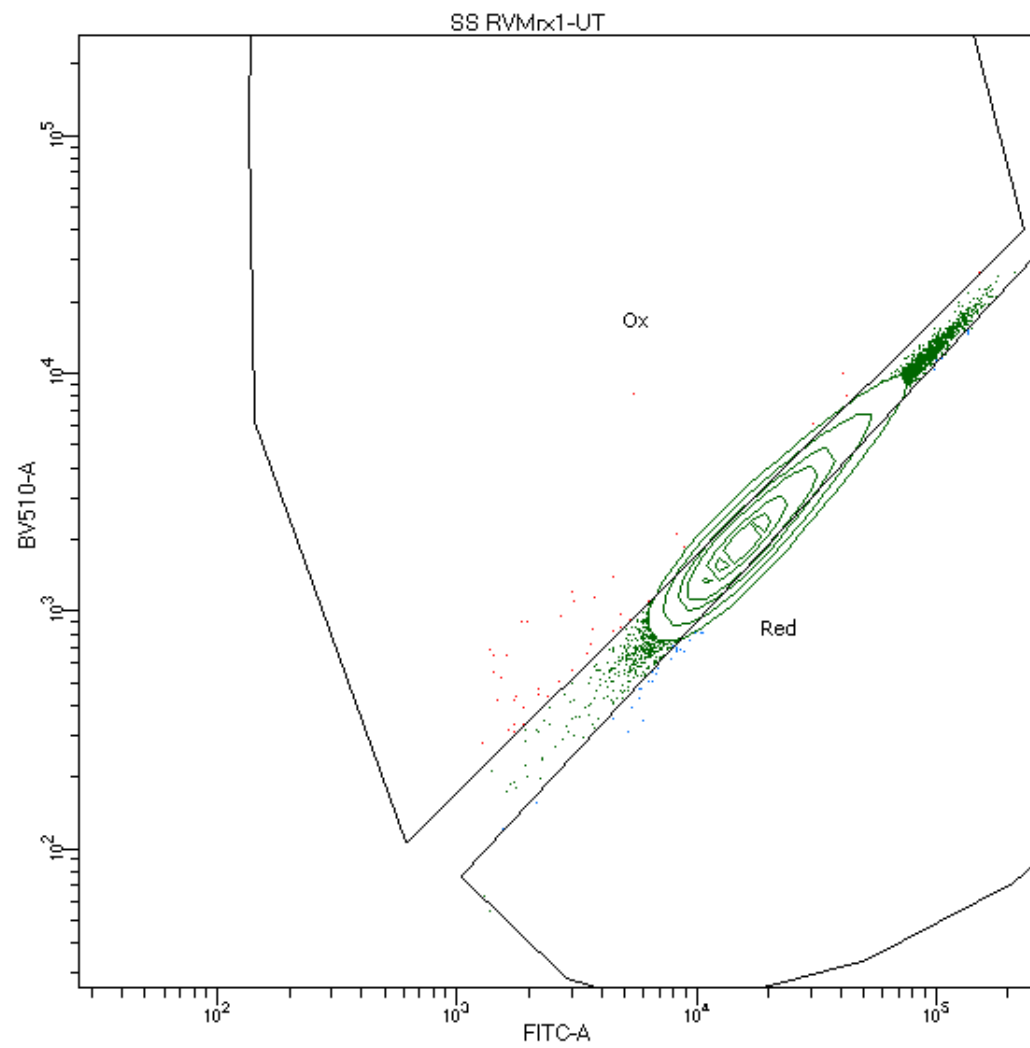

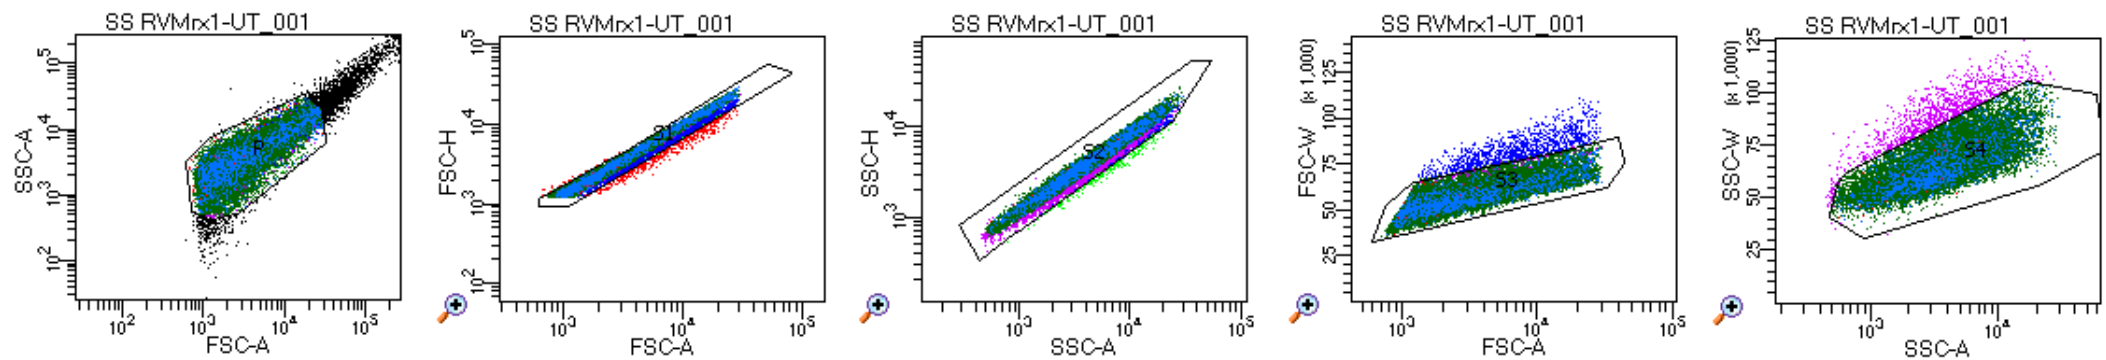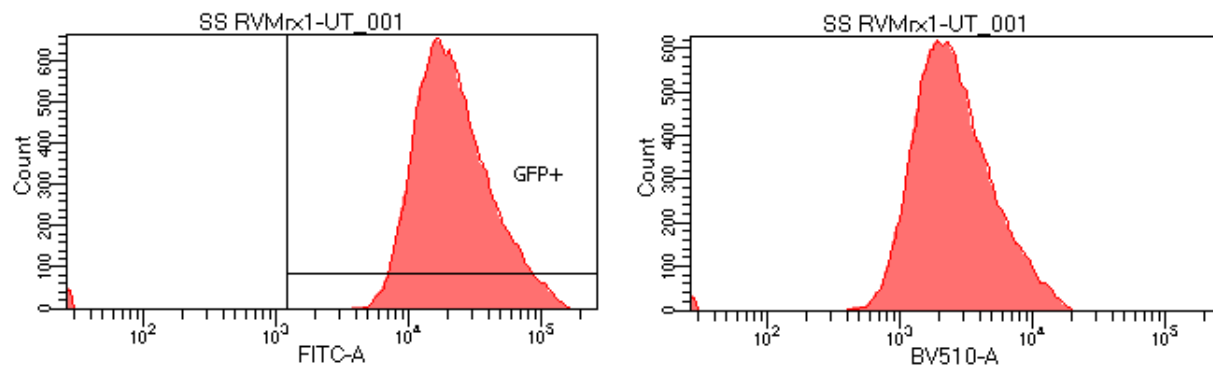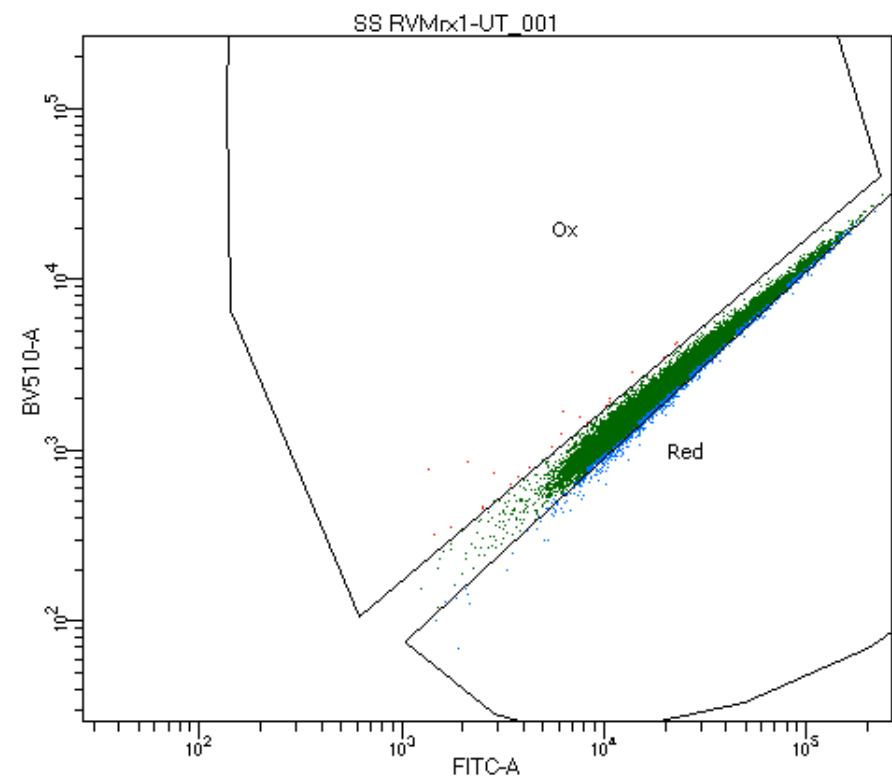

Tube: UT\_001

| Population | #Events | %Parent | %Total |
|------------|---------|---------|--------|
| All Events | 32,775  | ####    | 100.0  |
| P          | 30,749  | 93.8    | 93.8   |
| S1         | 30,217  | 98.3    | 92.2   |
| S2         | 29,921  | 99.0    | 91.3   |
| S3         | 28,886  | 96.5    | 88.1   |
| S4         | 27,816  | 96.3    | 84.9   |
| GFP+       | 27,629  | 99.3    | 84.3   |
| Ox         | 24      | 0.1     | 0.1    |
| Red        | 1,323   | 4.8     | 4.0    |

Experiment Name: 31Jan2017 Bac sorting  
Specimen Name: SS RVMrx1  
Tube Name: UT\_001  
Record Date: Jan 31, 2017 2:47:54 PM  
\$OP: Administrator  
GUID: 842b0e0b-1f86-4b7a-876a-f338811...

| Population                                                                               | #Events | %Parent | FITC-A<br>Median | BV510-A<br>Median |
|------------------------------------------------------------------------------------------|---------|---------|------------------|-------------------|
|  S4   | 27,816  | 96.3    | 19,580           | 2,294             |
|  GFP+ | 27,629  | 99.3    | 19,673           | 2,307             |
|  Ox   | 24      | 0.1     | 4,851            | 952               |
|  Red  | 1,323   | 4.8     | 20,869           | 1,999             |

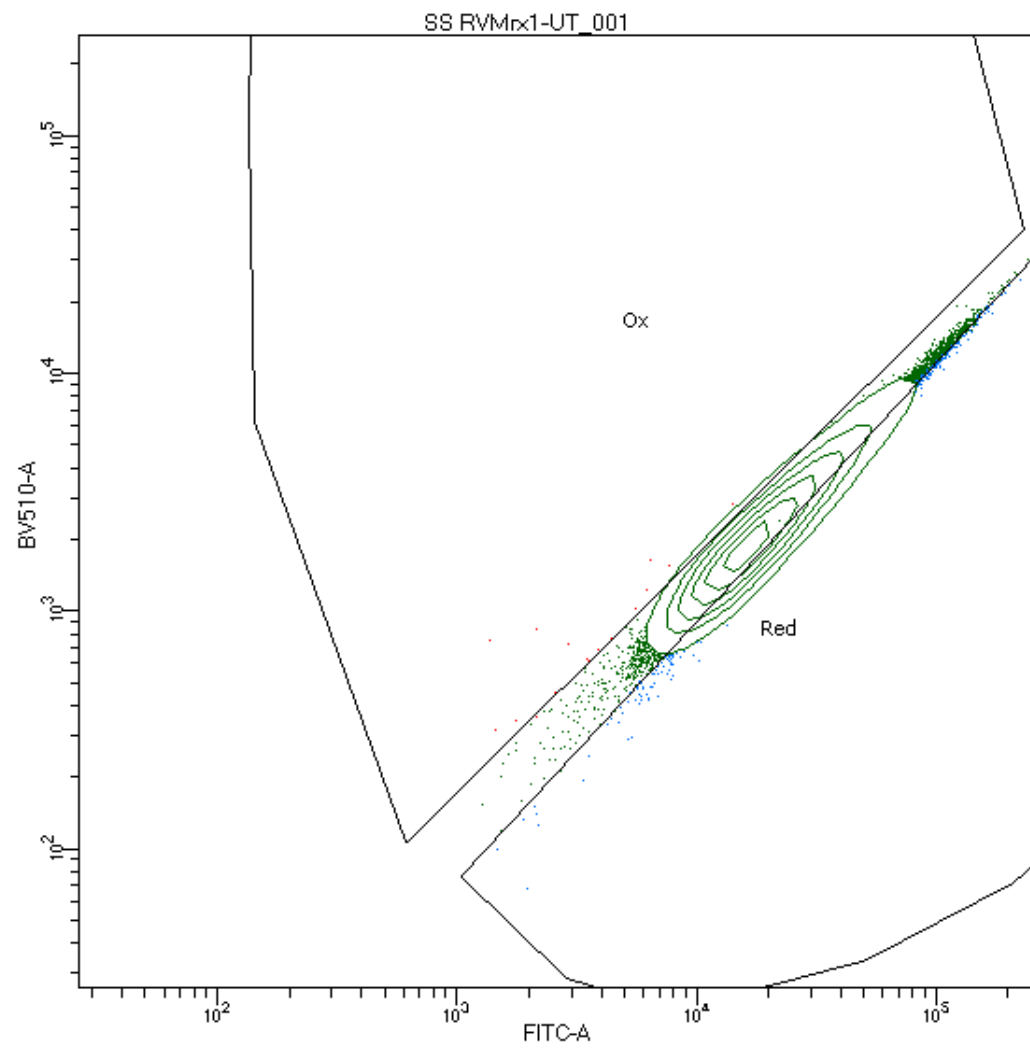

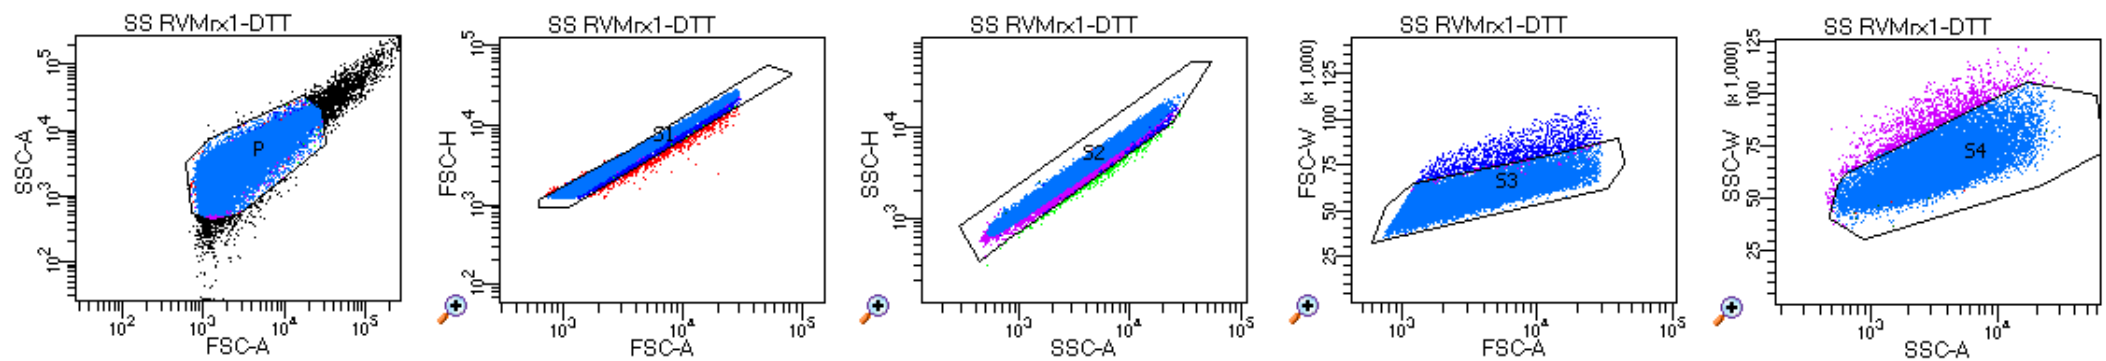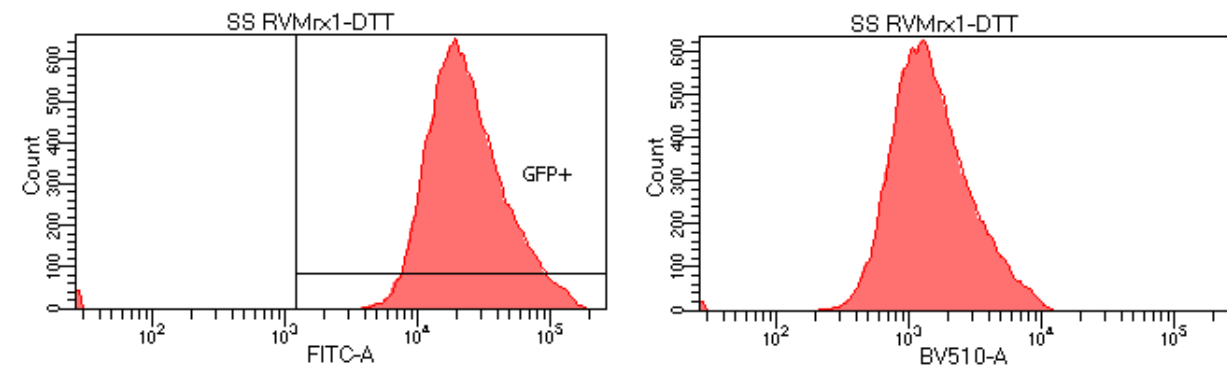

| Population   | #Events | %Parent | %Total |
|--------------|---------|---------|--------|
| ■ All Events | 33,023  | ####    | 100.0  |
| ■ P          | 30,824  | 93.3    | 93.3   |
| ■ S1         | 30,162  | 97.9    | 91.3   |
| ■ S2         | 29,844  | 98.9    | 90.4   |
| ■ S3         | 28,578  | 95.8    | 86.5   |
| ■ S4         | 27,292  | 95.5    | 82.6   |
| ■ GFP+       | 27,124  | 99.4    | 82.1   |
| ■ Ox         | 14      | 0.1     | 0.0    |
| ■ Red        | 27,027  | 99.6    | 81.8   |

Experiment Name: 31Jan2017 Bac sorting  
Specimen Name: SS RVMrx1  
Tube Name: DTT  
Record Date: Jan 31, 2017 2:48:27 PM  
\$OP: Administrator  
GUID: 52e971b1-d71a-4596-8f36-63f7591...

| Population                                                                               | #Events | %Parent | FITC-A<br>Median | BV510-A<br>Median |
|------------------------------------------------------------------------------------------|---------|---------|------------------|-------------------|
|  S4   | 27,292  | 95.5    | 21,125           | 1,323             |
|  GFP+ | 27,124  | 99.4    | 21,215           | 1,330             |
|  Ox   | 14      | 0.1     | 1,767            | 451               |
|  Red  | 27,027  | 99.6    | 21,270           | 1,334             |

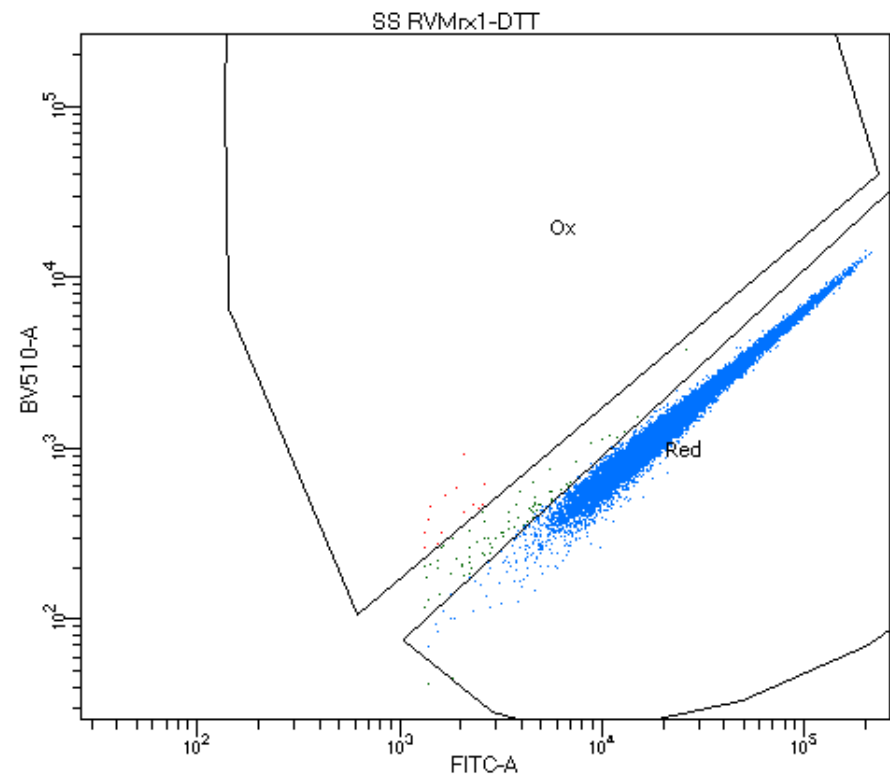

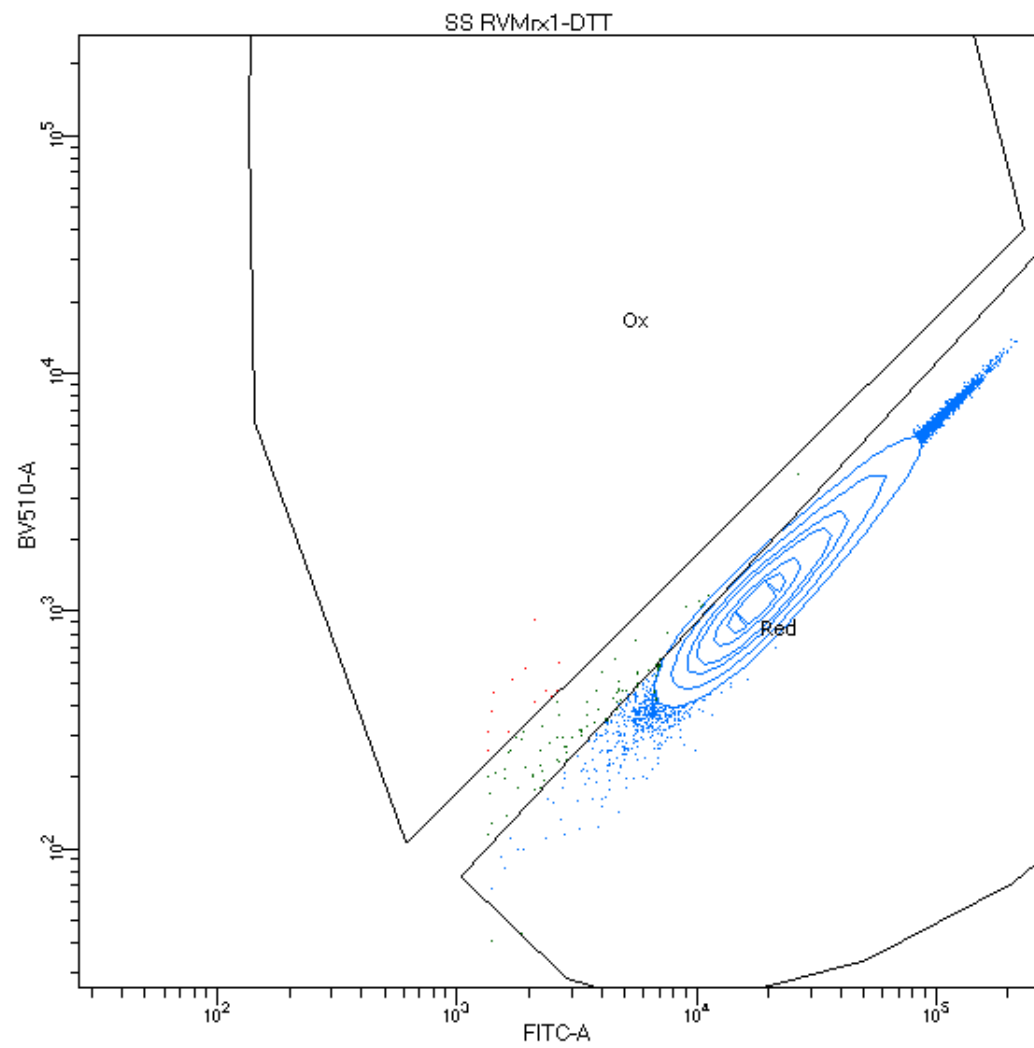

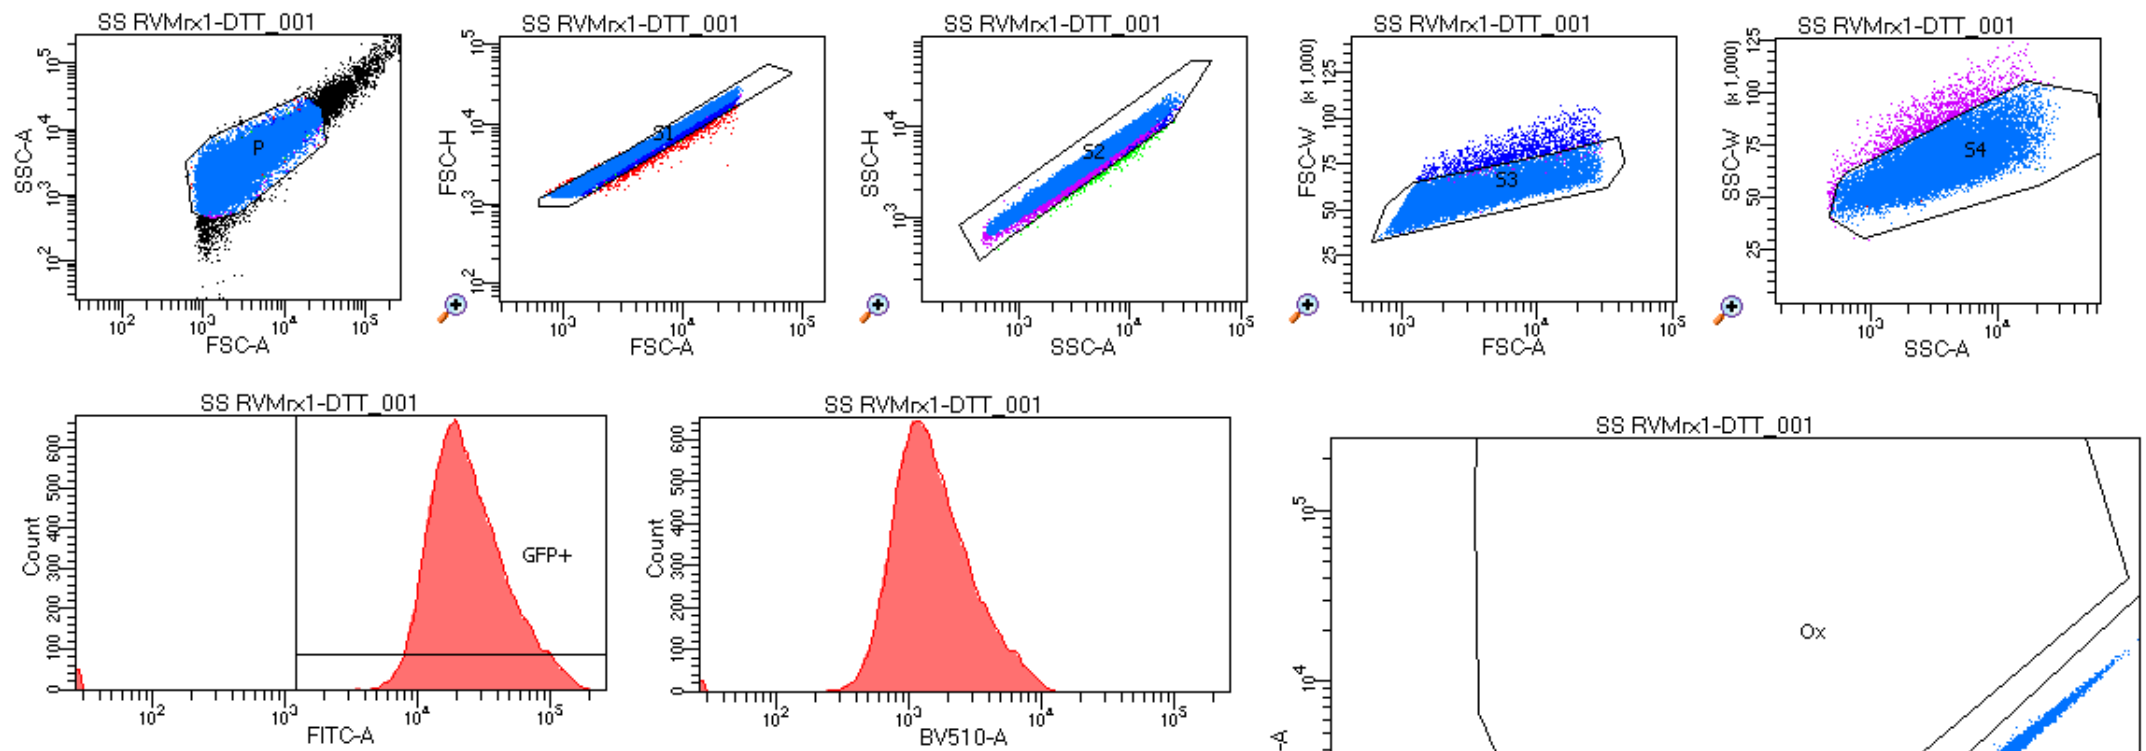

| Population | #Events | %Parent | %Total |
|------------|---------|---------|--------|
| All Events | 33,041  | ####    | 100.0  |
| P          | 30,818  | 93.3    | 93.3   |
| S1         | 30,274  | 98.2    | 91.6   |
| S2         | 29,981  | 99.0    | 90.7   |
| S3         | 28,801  | 96.1    | 87.2   |
| S4         | 27,684  | 96.1    | 83.8   |
| GFP+       | 27,500  | 99.3    | 83.2   |
| Ox         | 15      | 0.1     | 0.0    |
| Red        | 27,415  | 99.7    | 83.0   |

|                  |                                     |  |  |  |
|------------------|-------------------------------------|--|--|--|
| Experiment Name: | 31Jan2017 Bac sorting               |  |  |  |
| Specimen Name:   | SS RVMrx1                           |  |  |  |
| Tube Name:       | DTT_001                             |  |  |  |
| Record Date:     | Jan 31, 2017 2:48:57 PM             |  |  |  |
| \$OP:            | Administrator                       |  |  |  |
| GUID:            | d0a2f93b-f57c-4b21-87bd-8f67cb40... |  |  |  |

  

| Population                                                                             | #Events | %Parent | FITC-A<br>Median | BV510-A<br>Median |
|----------------------------------------------------------------------------------------|---------|---------|------------------|-------------------|
|  S4   | 27,684  | 96.1    | 21,422           | 1,350             |
|  GFP+ | 27,500  | 99.3    | 21,540           | 1,357             |
|  Ox   | 15      | 0.1     | 2,153            | 492               |
|  Red  | 27,415  | 99.7    | 21,602           | 1,359             |

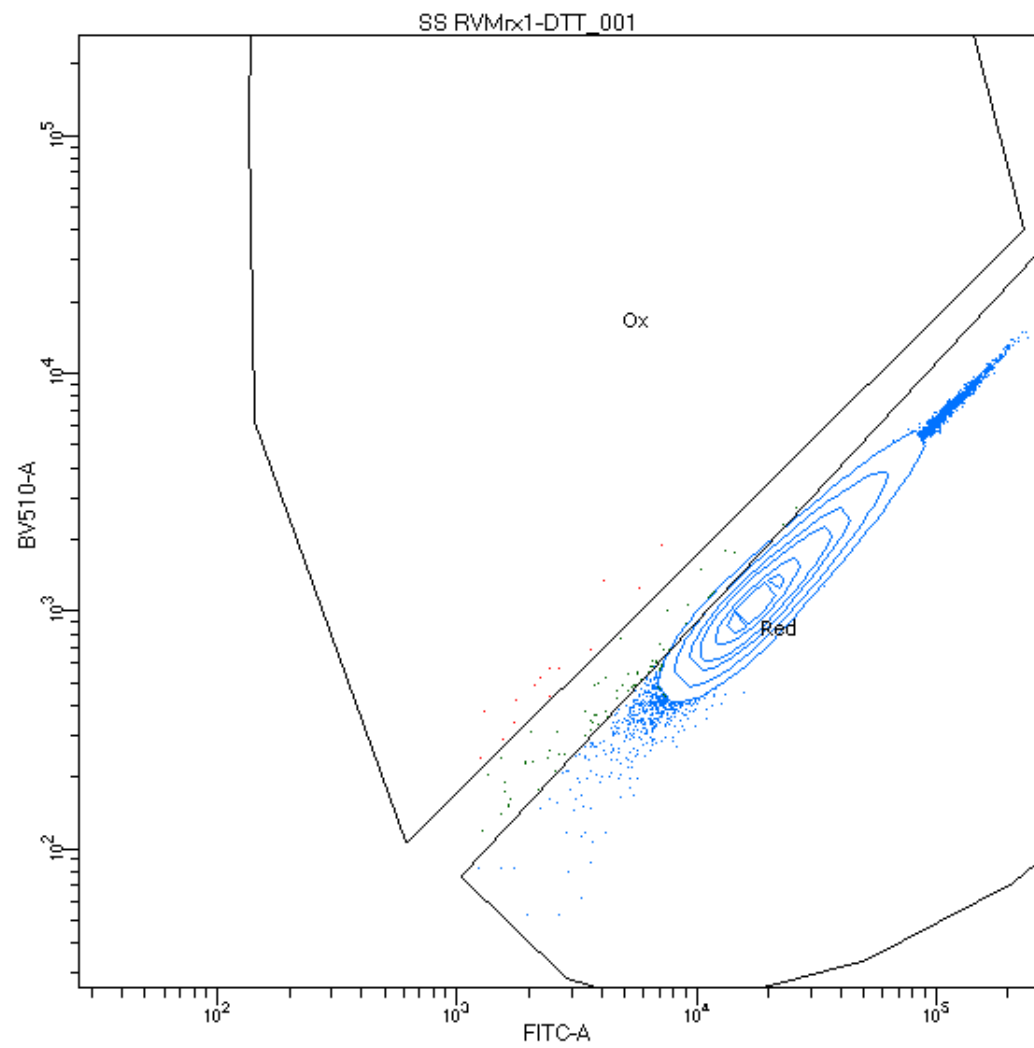



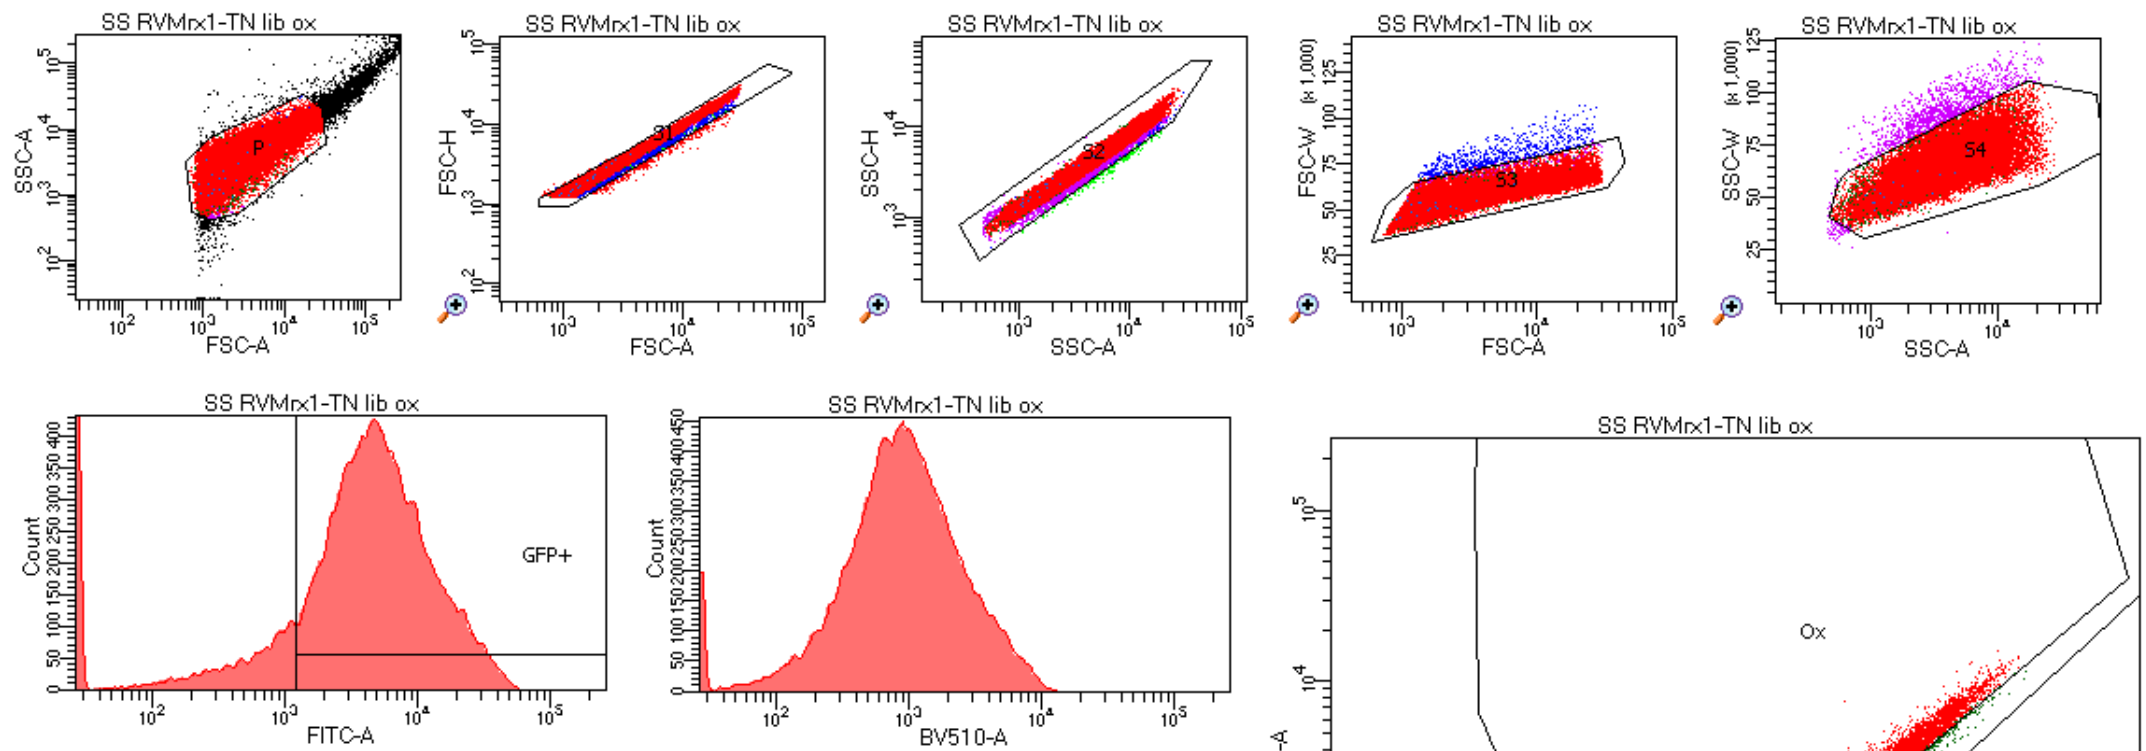

Tube: TN lib ox

| Population | #Events | %Parent | %Total |
|------------|---------|---------|--------|
| All Events | 33,732  | ####    | 100.0  |
| P          | 30,876  | 91.5    | 91.5   |
| S1         | 30,526  | 98.9    | 90.5   |
| S2         | 30,290  | 99.2    | 89.8   |
| S3         | 29,646  | 97.9    | 87.9   |
| S4         | 28,309  | 95.5    | 83.9   |
| GFP+       | 23,438  | 82.8    | 69.5   |
| Ox         | 18,686  | 79.7    | 55.4   |
| Red        | 18      | 0.1     | 0.1    |

|                  |                                    |  |  |  |
|------------------|------------------------------------|--|--|--|
| Experiment Name: | 31Jan2017 Bac sorting              |  |  |  |
| Specimen Name:   | SS RVMrx1                          |  |  |  |
| Tube Name:       | TN lib ox                          |  |  |  |
| Record Date:     | Jan 31, 2017 3:04:03 PM            |  |  |  |
| \$OP:            | Administrator                      |  |  |  |
| GUID:            | 17fe9740-a53c-4ba2-8c74-0f2db07... |  |  |  |

  

| Population                                                                             | #Events | %Parent | FITC-A<br>Median | BV510-A<br>Median |
|----------------------------------------------------------------------------------------|---------|---------|------------------|-------------------|
|  S4   | 28,309  | 95.5    | 4,100            | 863               |
|  GFP+ | 23,438  | 82.8    | 5,032            | 1,052             |
|  Ox   | 18,686  | 79.7    | 5,123            | 1,142             |
|  Red  | 18      | 0.1     | 1,948            | 118               |

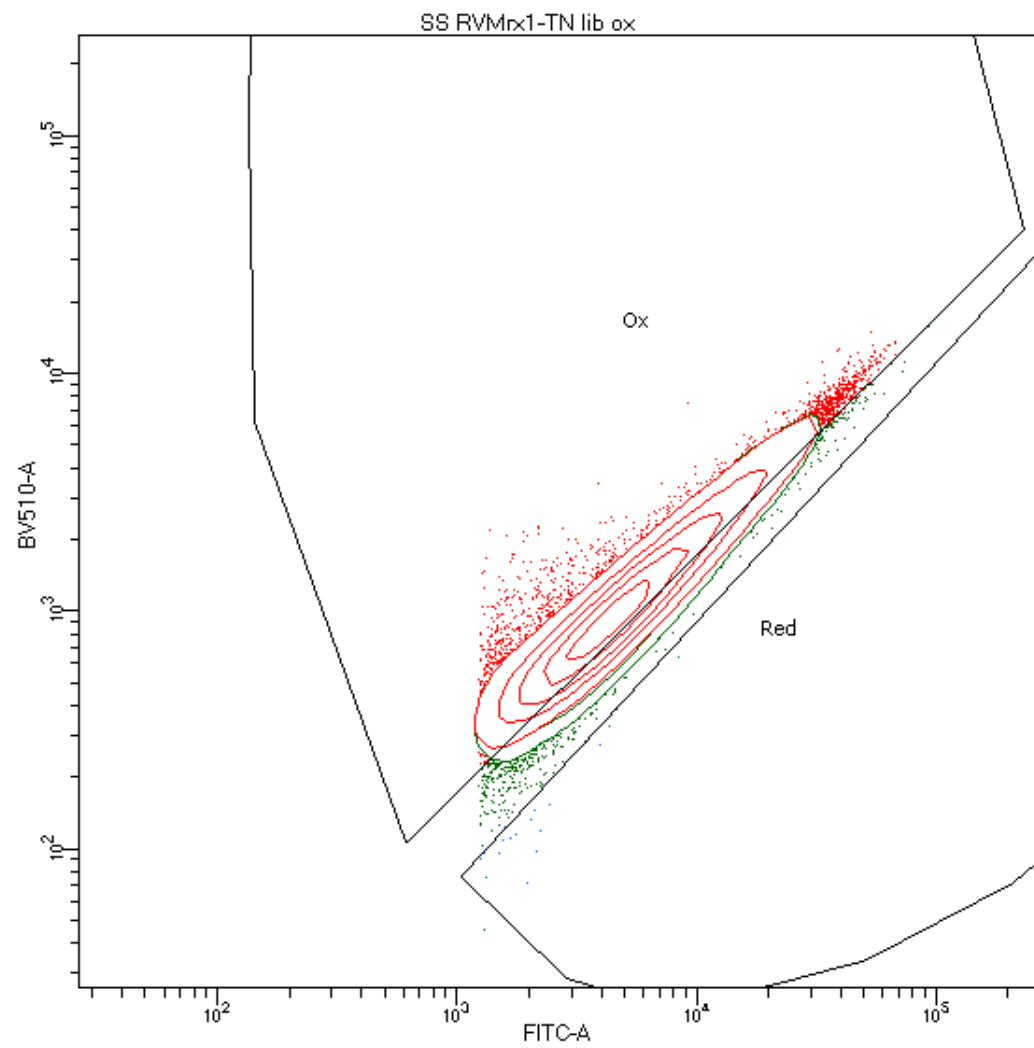

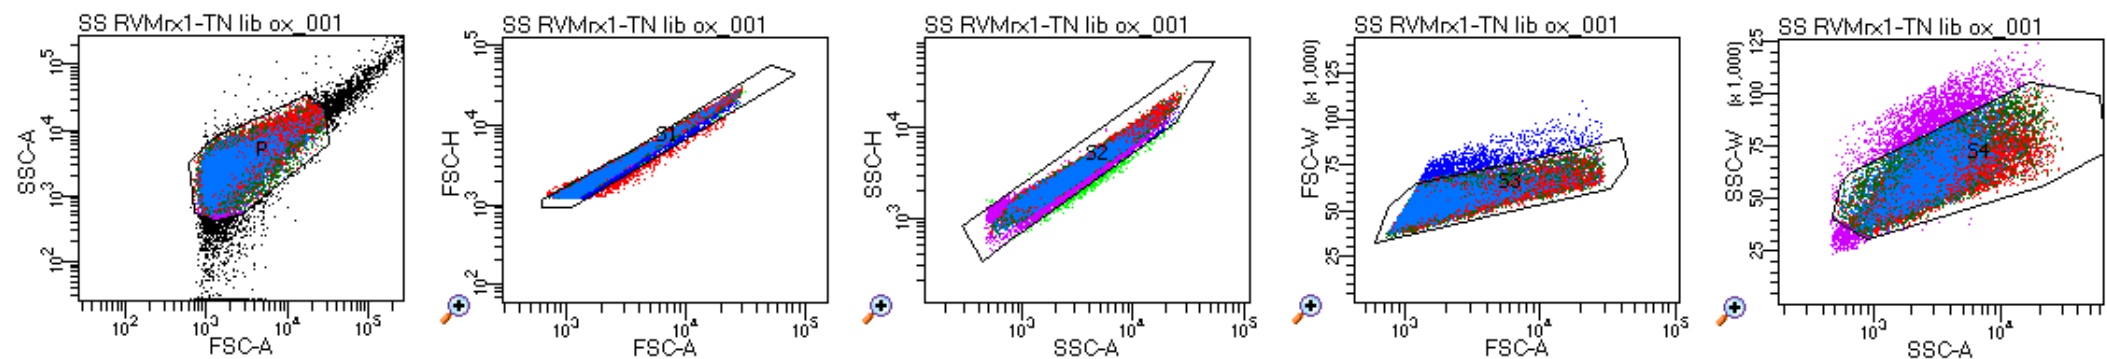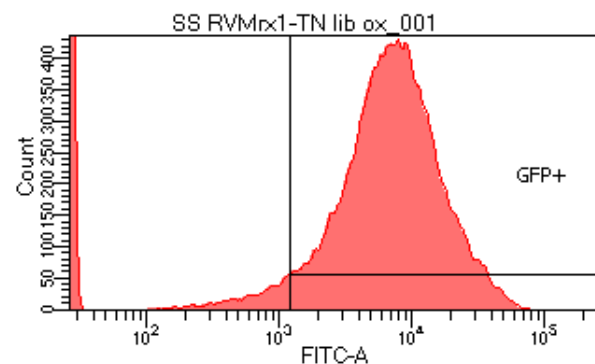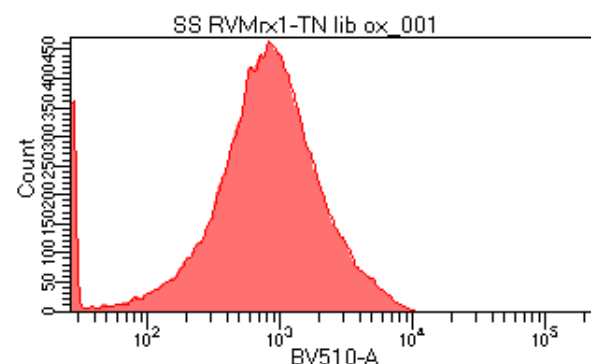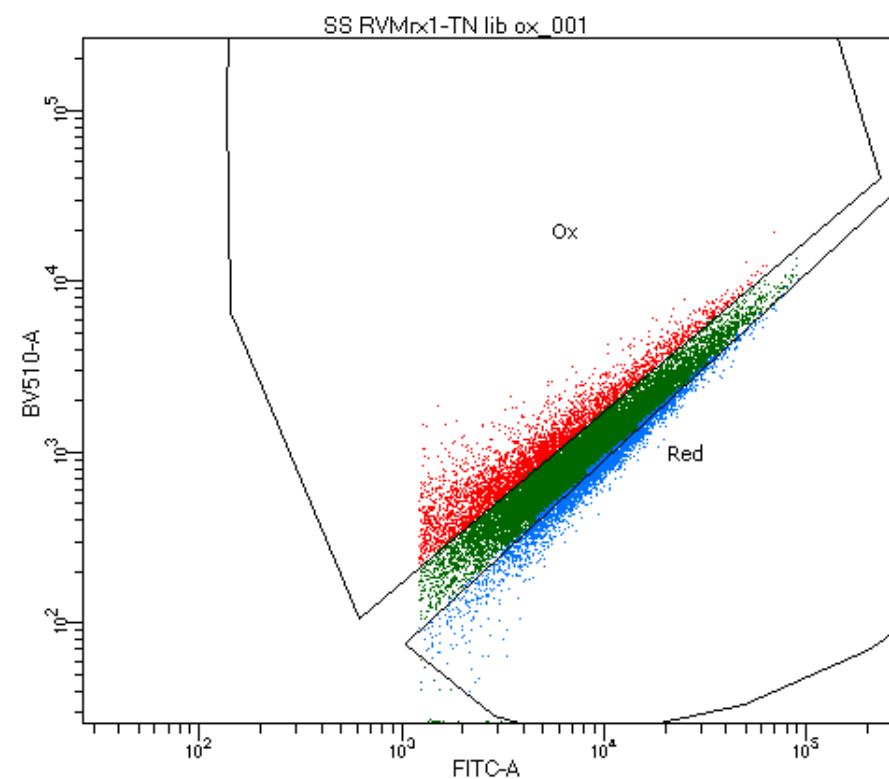

Tube: TN lib ox\_001

| Population | #Events | %Parent | %Total |
|------------|---------|---------|--------|
| All Events | 33,226  | ####    | 100.0  |
| P          | 30,691  | 92.4    | 92.4   |
| S1         | 30,173  | 98.3    | 90.8   |
| S2         | 29,700  | 98.4    | 89.4   |
| S3         | 28,530  | 96.1    | 85.9   |
| S4         | 25,936  | 90.9    | 78.1   |
| GFP+       | 22,462  | 86.6    | 67.6   |
| Ox         | 3,446   | 15.3    | 10.4   |
| Red        | 3,465   | 15.4    | 10.4   |

Experiment Name: 31Jan2017 Bac sorting  
 Specimen Name: SS RVMrx1  
 Tube Name: TN lib ox\_001  
 Record Date: Jan 31, 2017 3:04:43 PM  
 SOP: Administrator  
 GUID: 2c888717-4ed2-491e-a1d0-725760...

| Population | #Events | %Parent | FITC-A<br>Median | BV510-A<br>Median |
|------------|---------|---------|------------------|-------------------|
| S4         | 25,936  | 90.9    | 6,237            | 772               |
| GFP+       | 22,462  | 86.6    | 7,221            | 882               |
| Ox         | 3,446   | 15.3    | 4,149            | 928               |
| Red        | 3,465   | 15.4    | 8,672            | 713               |

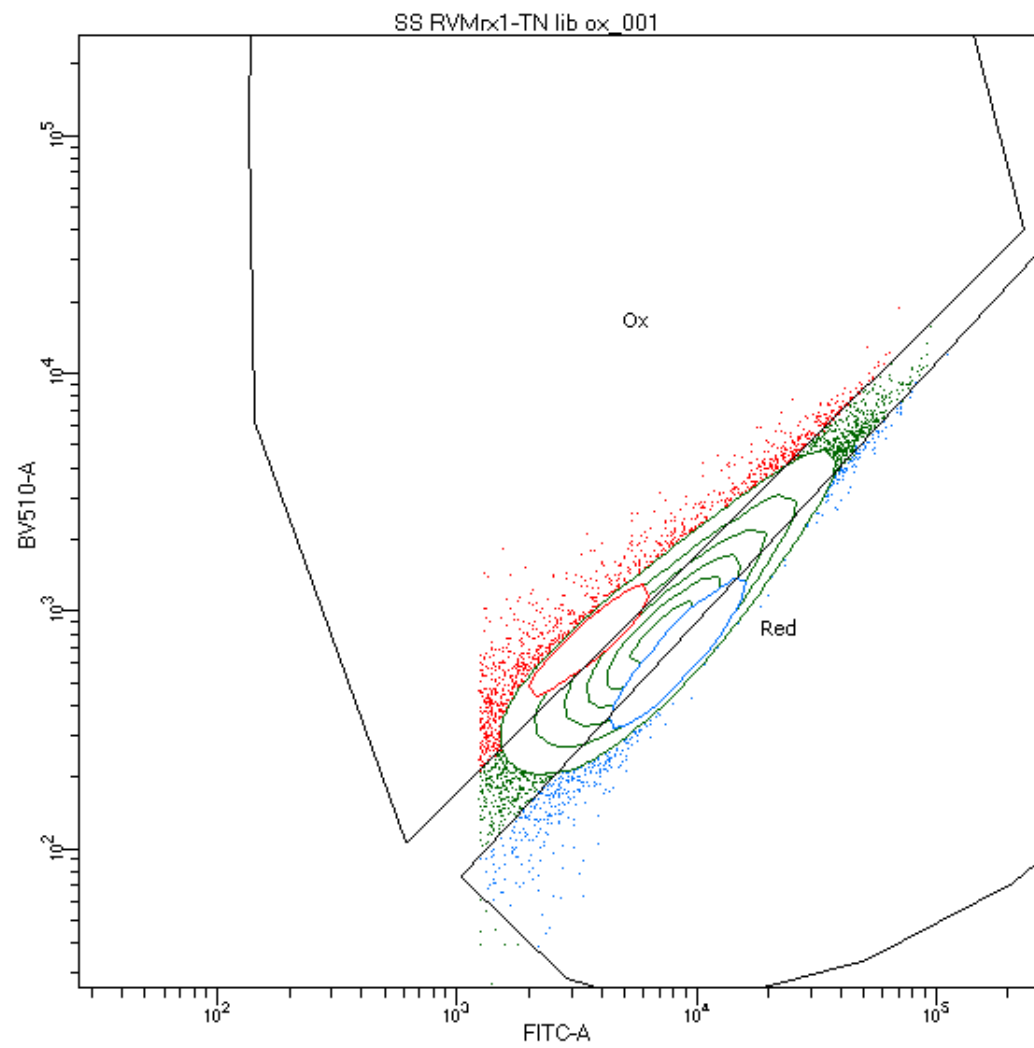



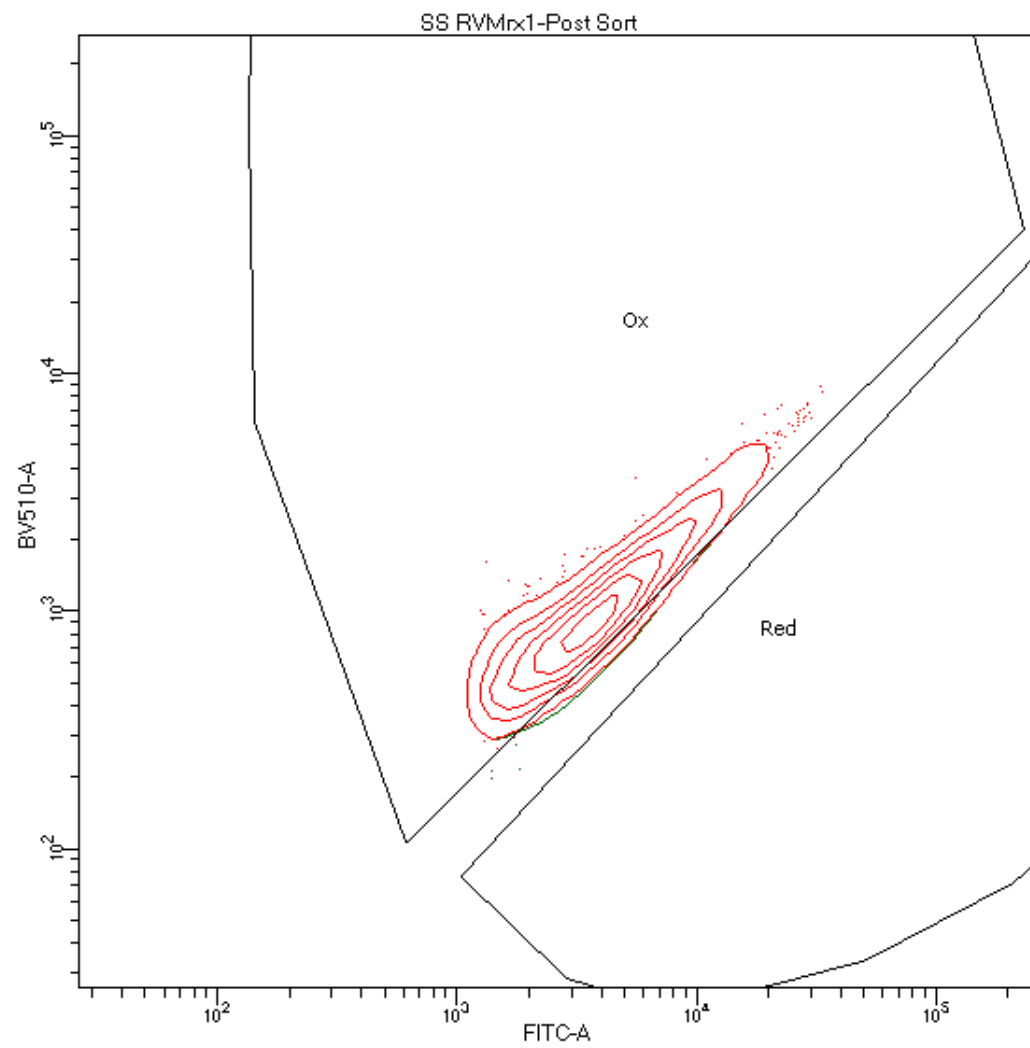

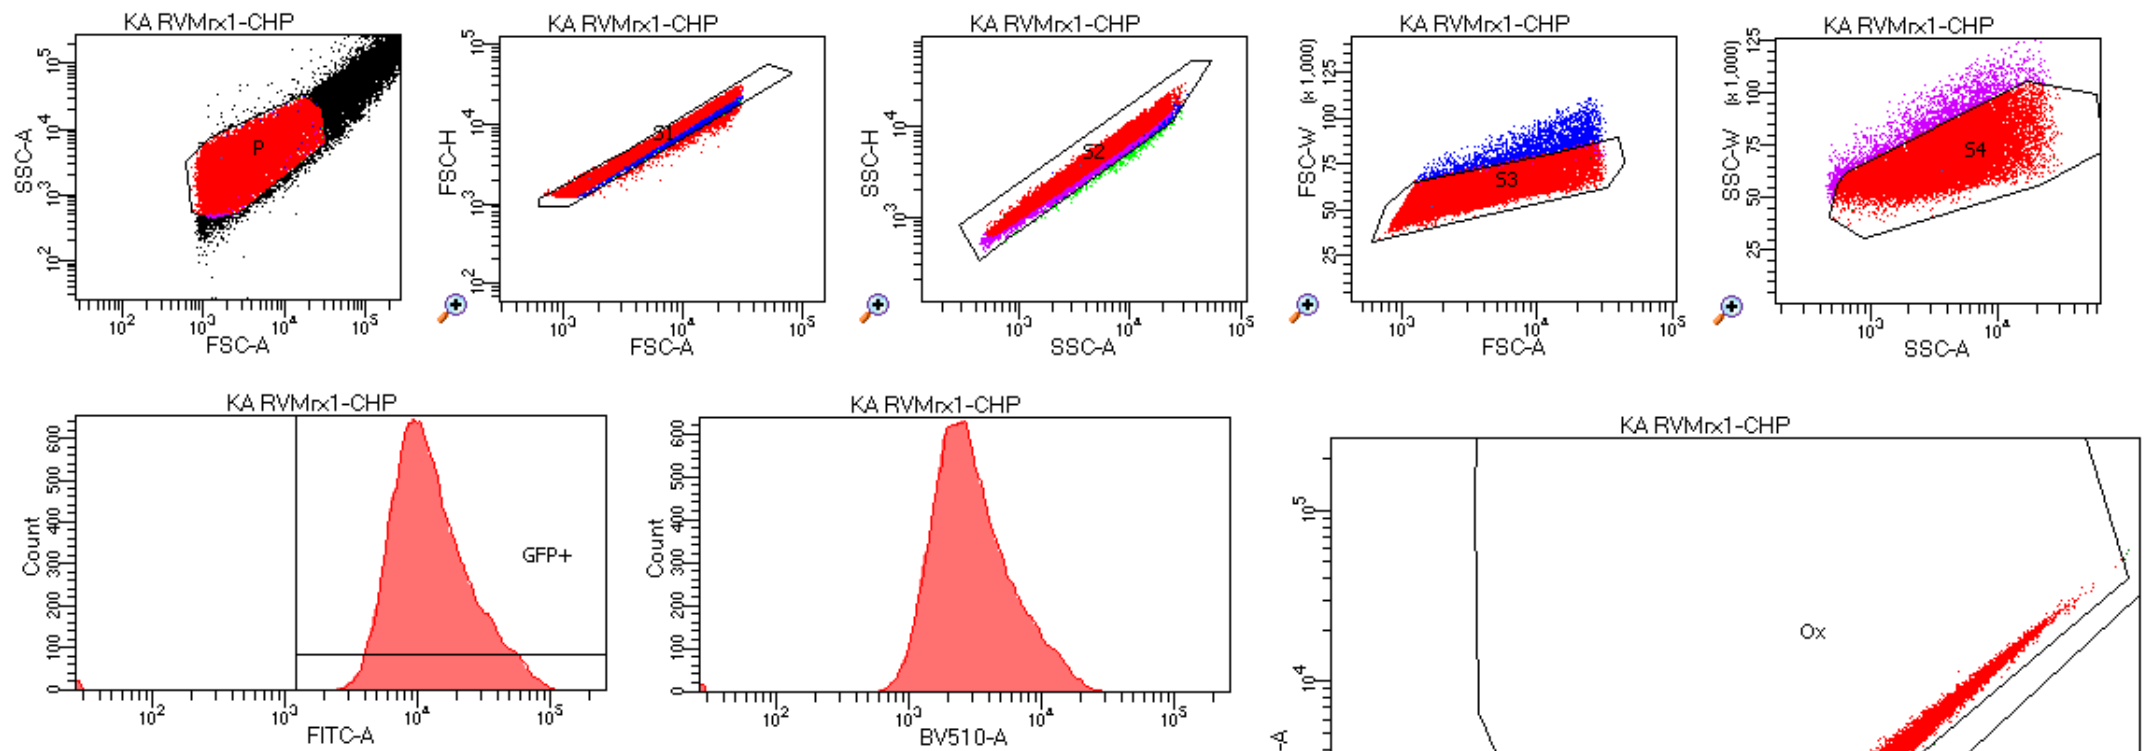

Tube: CHP

| Population | #Events | %Parent | %Total |
|------------|---------|---------|--------|
| All Events | 44,825  | ####    | 100.0  |
| P          | 32,195  | 71.8    | 71.8   |
| S1         | 31,482  | 97.8    | 70.2   |
| S2         | 31,074  | 98.7    | 69.3   |
| S3         | 28,906  | 93.0    | 64.5   |
| S4         | 27,056  | 93.6    | 60.4   |
| GFP+       | 26,808  | 99.1    | 59.8   |
| Ox         | 26,711  | 99.6    | 59.6   |
| Red        | 1       | 0.0     | 0.0    |

|                  |                                    |  |  |  |
|------------------|------------------------------------|--|--|--|
| Experiment Name: | 31Jan2017 Bac sorting              |  |  |  |
| Specimen Name:   | KA RVMrx1                          |  |  |  |
| Tube Name:       | CHP                                |  |  |  |
| Record Date:     | Jan 31, 2017 2:53:28 PM            |  |  |  |
| \$OP:            | Administrator                      |  |  |  |
| GUID:            | 25285a88-022e-4307-818f-ee118a9... |  |  |  |

  

| Population                                                                             | #Events | %Parent | FITC-A<br>Median | BV510-A<br>Median |
|----------------------------------------------------------------------------------------|---------|---------|------------------|-------------------|
|  S4   | 27,056  | 93.6    | 11,068           | 2,650             |
|  GFP+ | 26,808  | 99.1    | 11,155           | 2,665             |
|  Ox   | 26,711  | 99.6    | 11,174           | 2,672             |
|  Red  | 1       | 0.0     | 2,996            | 169               |

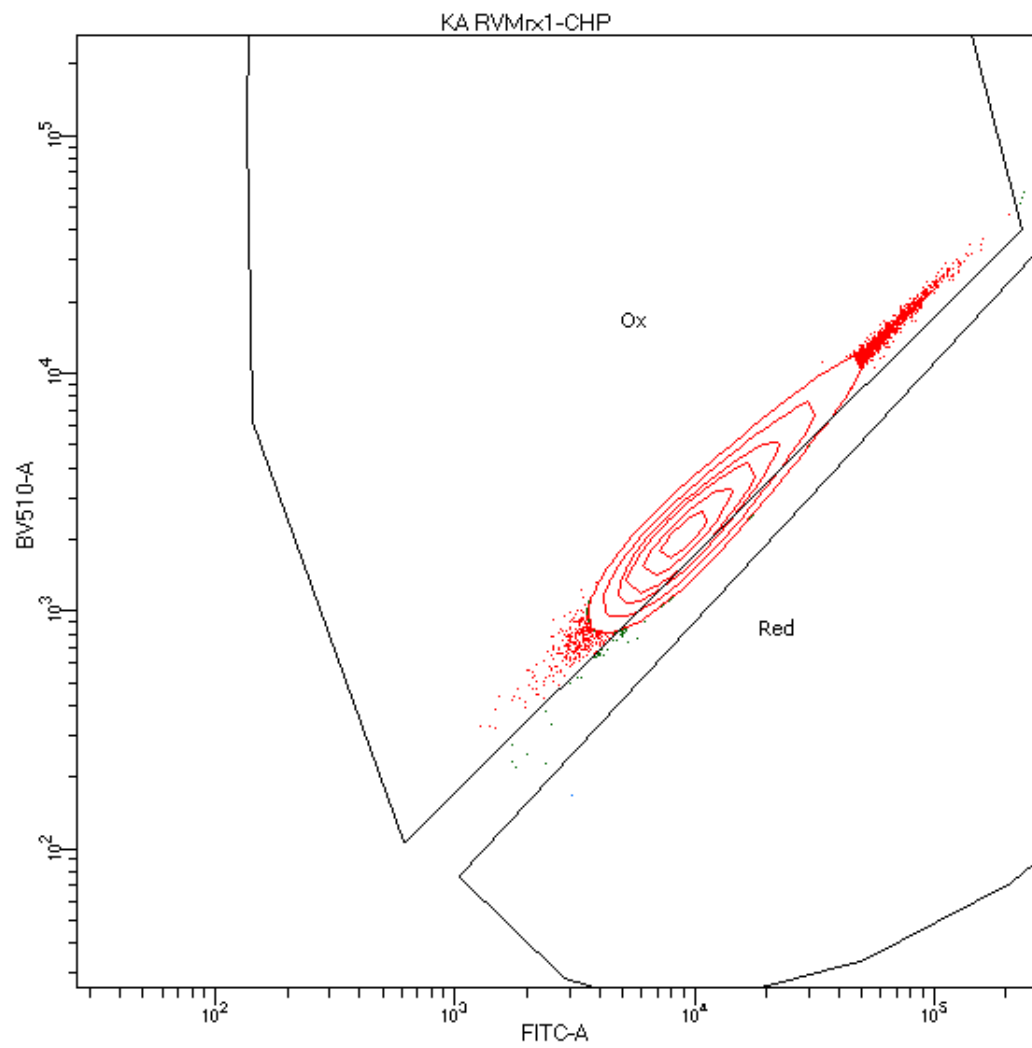



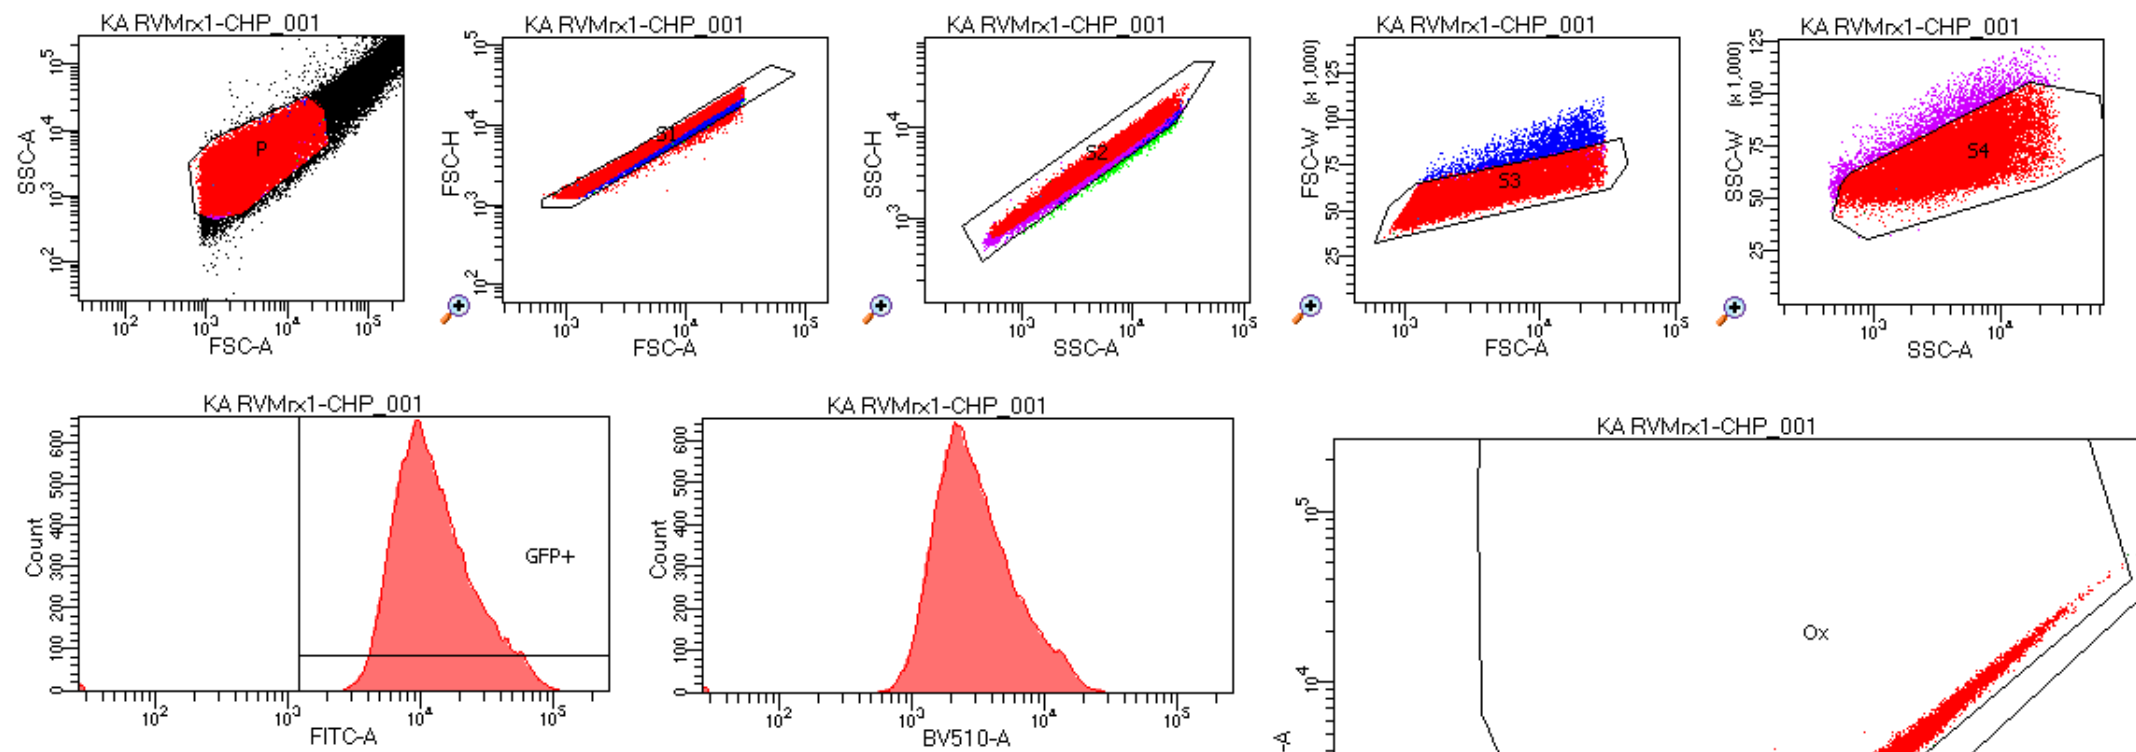

Tube: CHP\_001

| Population | #Events | %Parent | %Total |
|------------|---------|---------|--------|
| All Events | 45,066  | ####    | 100.0  |
| P          | 32,271  | 71.6    | 71.6   |
| S1         | 31,617  | 98.0    | 70.2   |
| S2         | 31,123  | 98.4    | 69.1   |
| S3         | 28,972  | 93.1    | 64.3   |
| S4         | 27,107  | 93.6    | 60.1   |
| GFP+       | 26,891  | 99.2    | 59.7   |
| Ox         | 26,788  | 99.6    | 59.4   |
| Red        | 1       | 0.0     | 0.0    |

Experiment Name: 31Jan2017 Bac sorting  
 Specimen Name: KA RVMrx1  
 Tube Name: CHP\_001  
 Record Date: Jan 31, 2017 2:54:09 PM  
 SOP: Administrator  
 GUID: 5d2d6c8d-5814-44ea-847d-b4133d...

| Population | #Events | %Parent | FITC-A<br>Median | BV510-A<br>Median |
|------------|---------|---------|------------------|-------------------|
| S4         | 27,107  | 93.6    | 11,099           | 2,629             |
| GFP+       | 26,891  | 99.2    | 11,164           | 2,646             |
| Ox         | 26,788  | 99.6    | 11,199           | 2,653             |
| Red        | 1       | 0.0     | 3,413            | 210               |

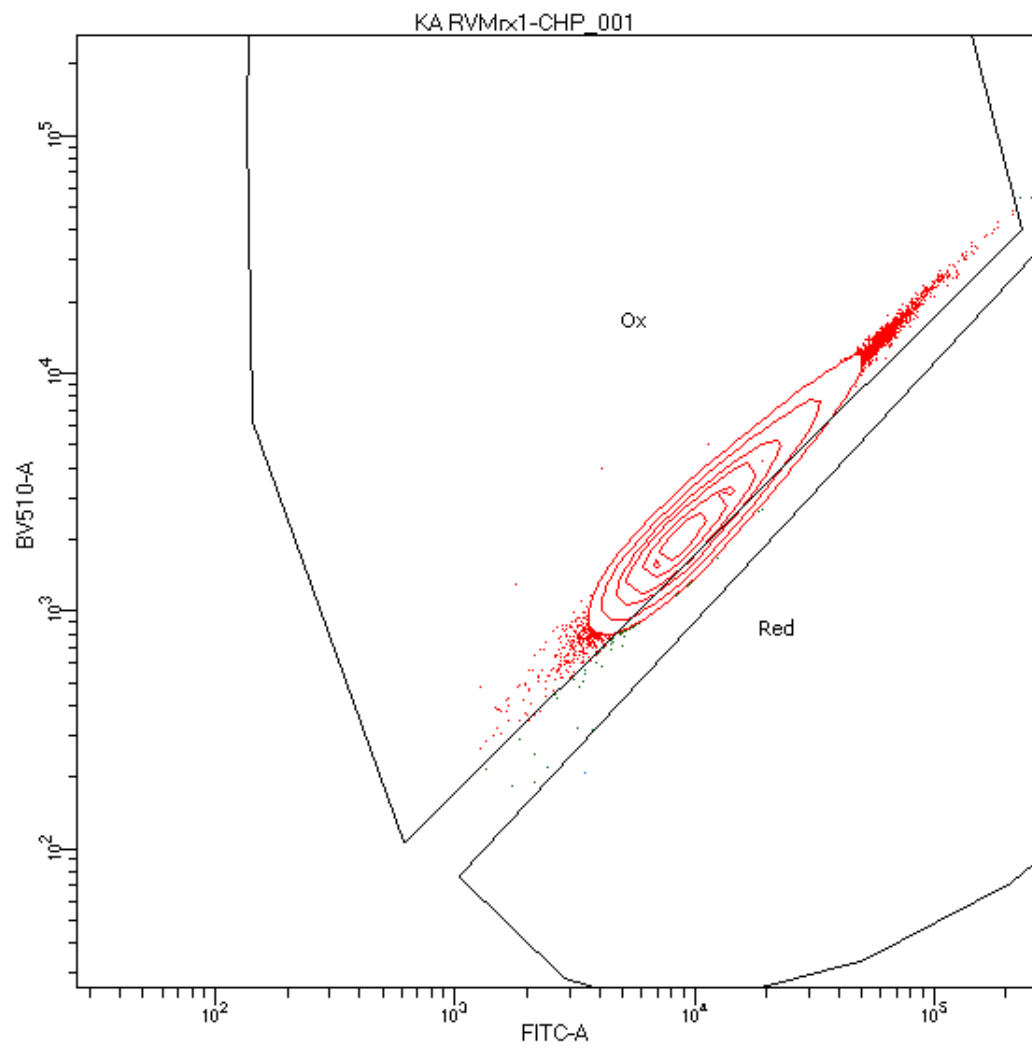

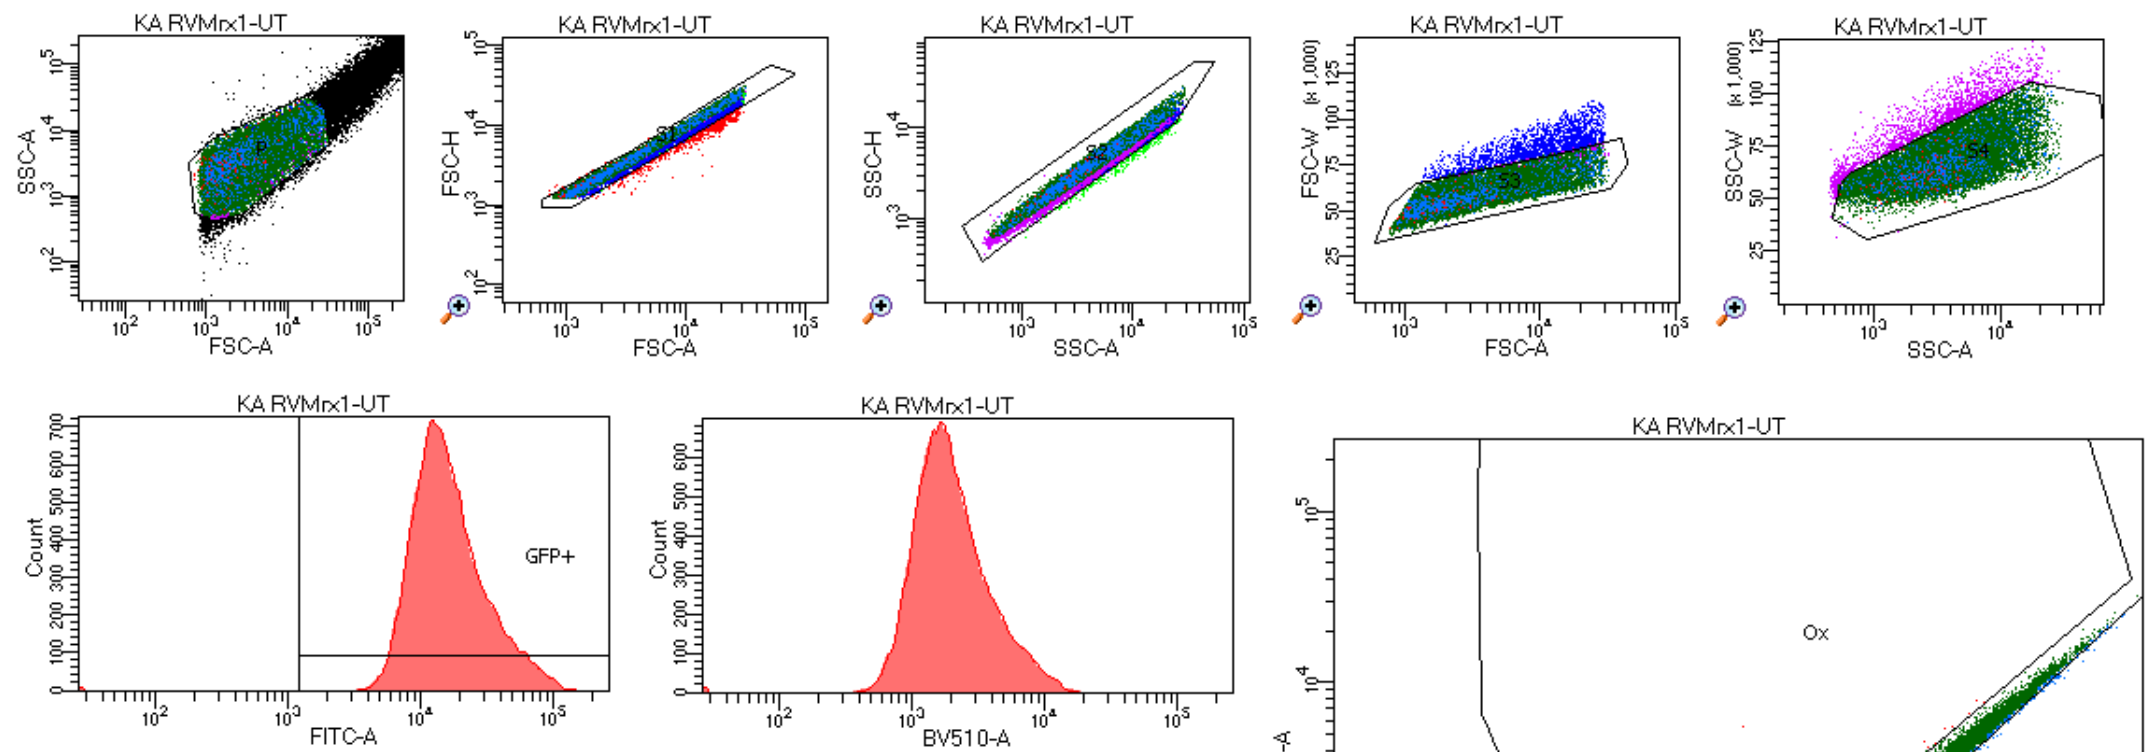

Tube: UT

| Population | #Events | %Parent | %Total |
|------------|---------|---------|--------|
| All Events | 44,103  | ####    | 100.0  |
| P          | 31,739  | 72.0    | 72.0   |
| S1         | 31,102  | 98.0    | 70.5   |
| S2         | 30,695  | 98.7    | 69.6   |
| S3         | 28,868  | 94.0    | 65.5   |
| S4         | 27,182  | 94.2    | 61.6   |
| GFP+       | 26,966  | 99.2    | 61.1   |
| Ox         | 101     | 0.4     | 0.2    |
| Red        | 770     | 2.9     | 1.7    |

|                  |                                    |
|------------------|------------------------------------|
| Experiment Name: | 31Jan2017 Bac sorting              |
| Specimen Name:   | KA RVMrx1                          |
| Tube Name:       | UT                                 |
| Record Date:     | Jan 31, 2017 2:51:53 PM            |
| SOP:             | Administrator                      |
| GUID:            | d32366f1-1f74-4868-a301-c4a423d... |

  

| Population | #Events | %Parent | FITC-A<br>Median | BV510-A<br>Median |
|------------|---------|---------|------------------|-------------------|
| S4         | 27,182  | 94.2    | 14,448           | 1,766             |
| GFP+       | 26,966  | 99.2    | 14,539           | 1,778             |
| Ox         | 101     | 0.4     | 9,647            | 1,979             |
| Red        | 770     | 2.9     | 16,366           | 1,554             |

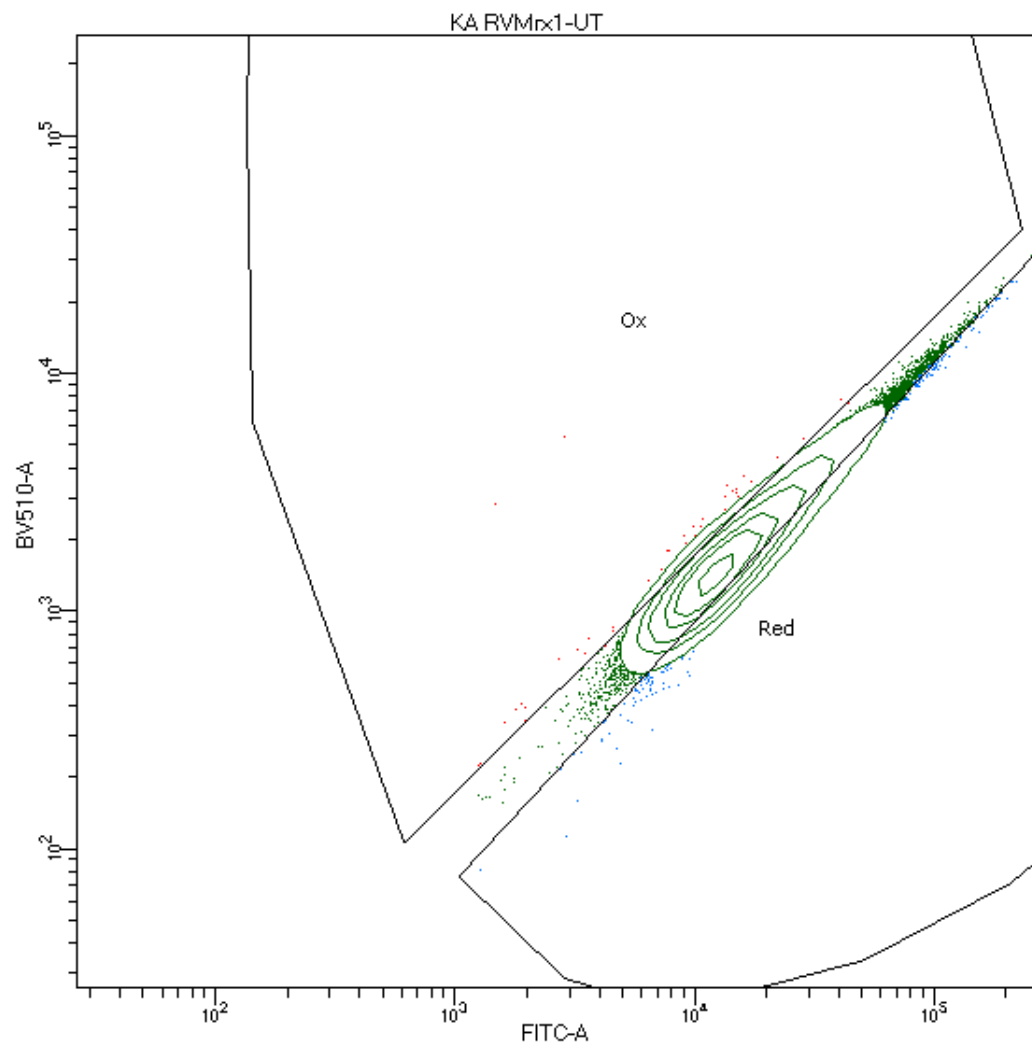

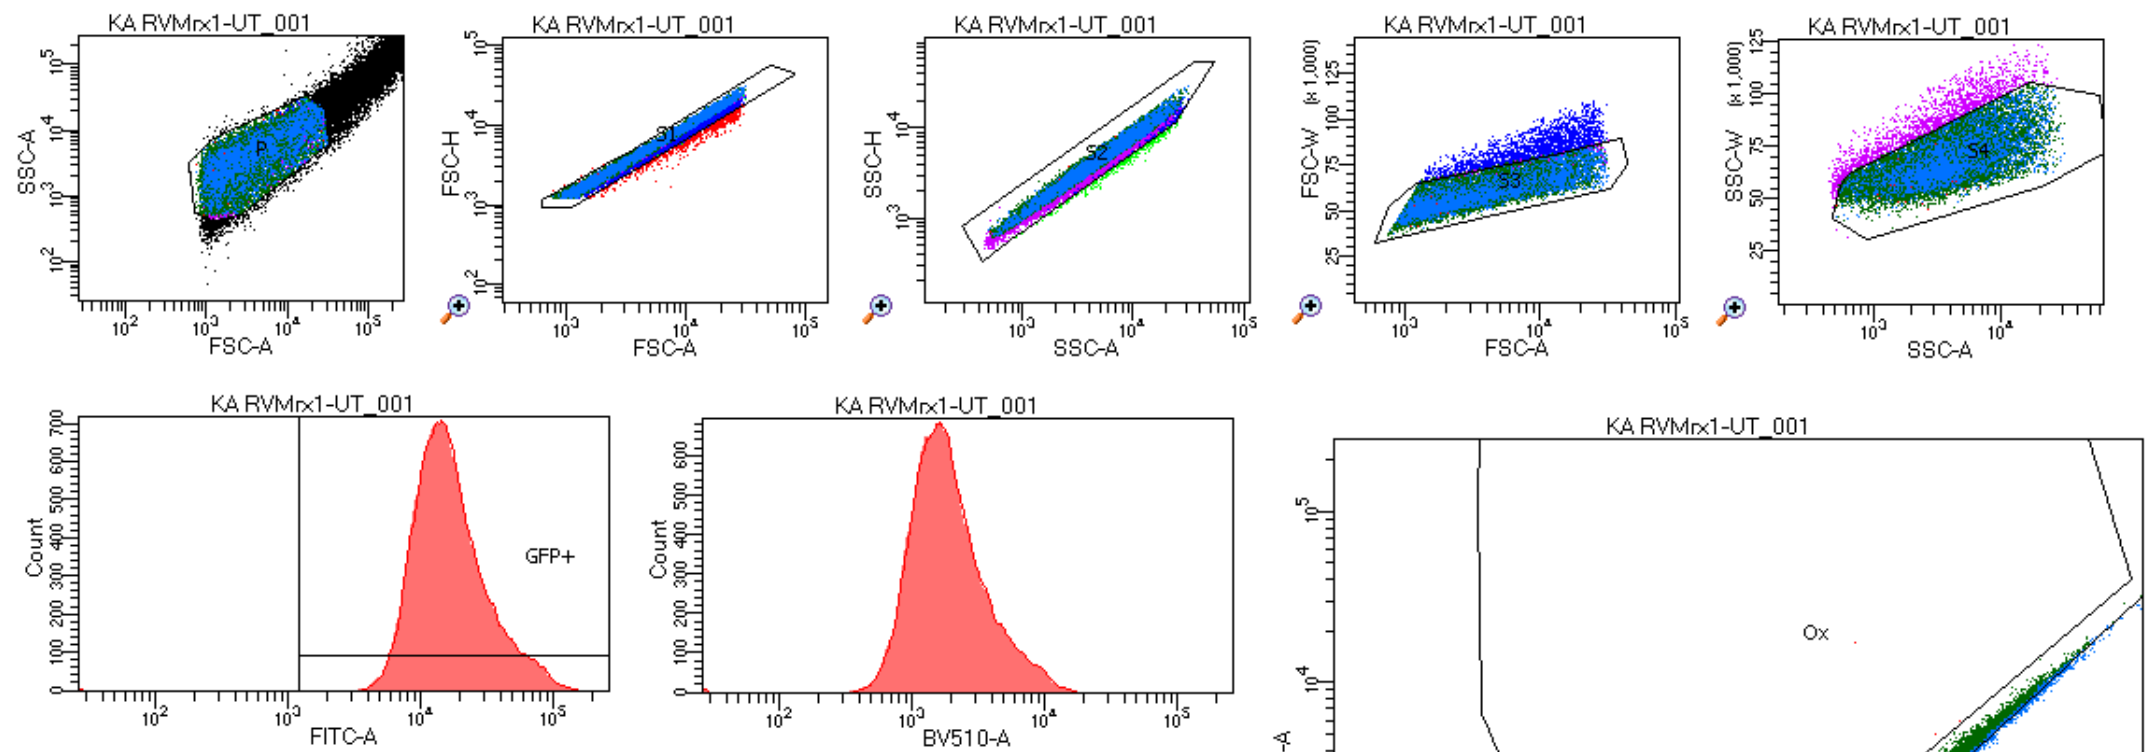

Tube: UT\_001

| Population | #Events | %Parent | %Total |
|------------|---------|---------|--------|
| All Events | 43,872  | ####    | 100.0  |
| P          | 31,784  | 72.4    | 72.4   |
| S1         | 31,115  | 97.9    | 70.9   |
| S2         | 30,688  | 98.6    | 69.9   |
| S3         | 28,865  | 94.1    | 65.8   |
| S4         | 27,210  | 94.3    | 62.0   |
| GFP+       | 27,001  | 99.2    | 61.5   |
| Ox         | 42      | 0.2     | 0.1    |
| Red        | 2,913   | 10.8    | 6.6    |

|                  |                                    |
|------------------|------------------------------------|
| Experiment Name: | 31Jan2017 Bac sorting              |
| Specimen Name:   | KA RVMrx1                          |
| Tube Name:       | UT_001                             |
| Record Date:     | Jan 31, 2017 2:52:44 PM            |
| SOP:             | Administrator                      |
| GUID:            | bb74f05f-8289-46cb-97a6-82b765d... |

  

| Population | #Events | %Parent | FITC-A<br>Median | BV510-A<br>Median |
|------------|---------|---------|------------------|-------------------|
| S4         | 27,210  | 94.3    | 14,912           | 1,668             |
| GFP+       | 27,001  | 99.2    | 14,994           | 1,677             |
| Ox         | 42      | 0.2     | 6,218            | 1,338             |
| Red        | 2,913   | 10.8    | 19,809           | 1,877             |

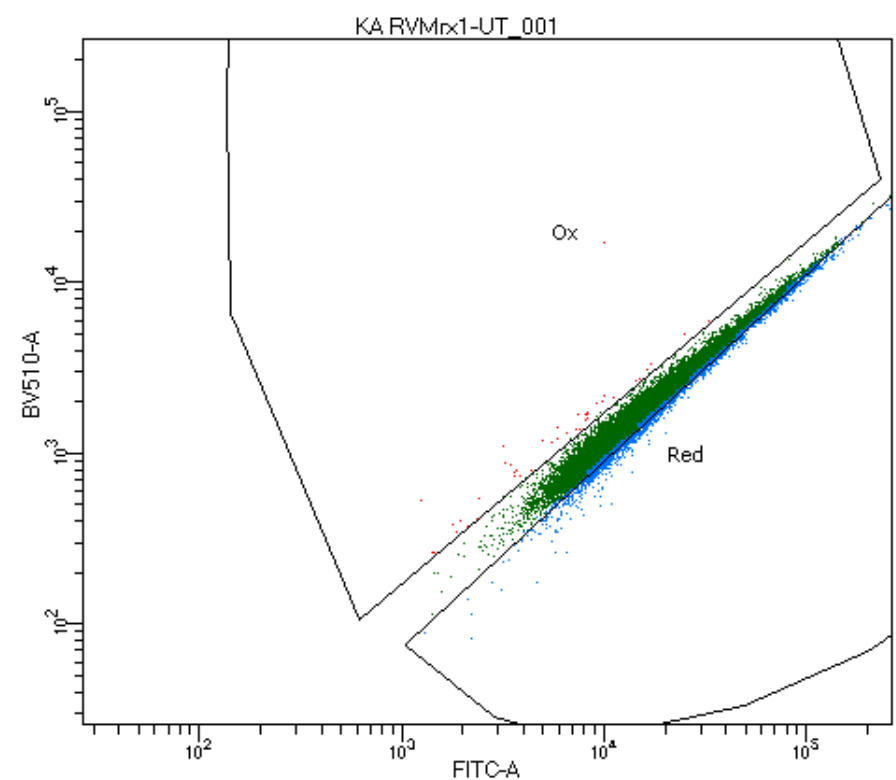

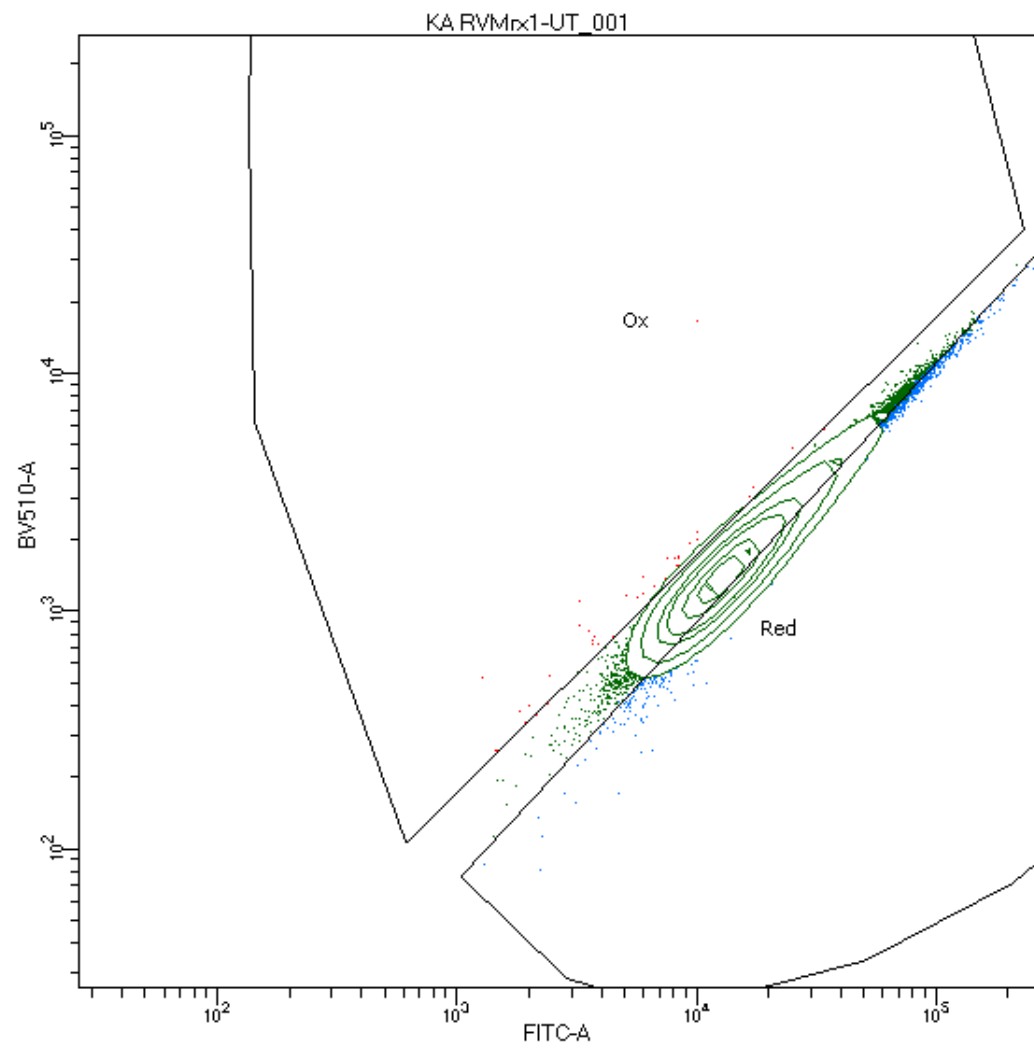

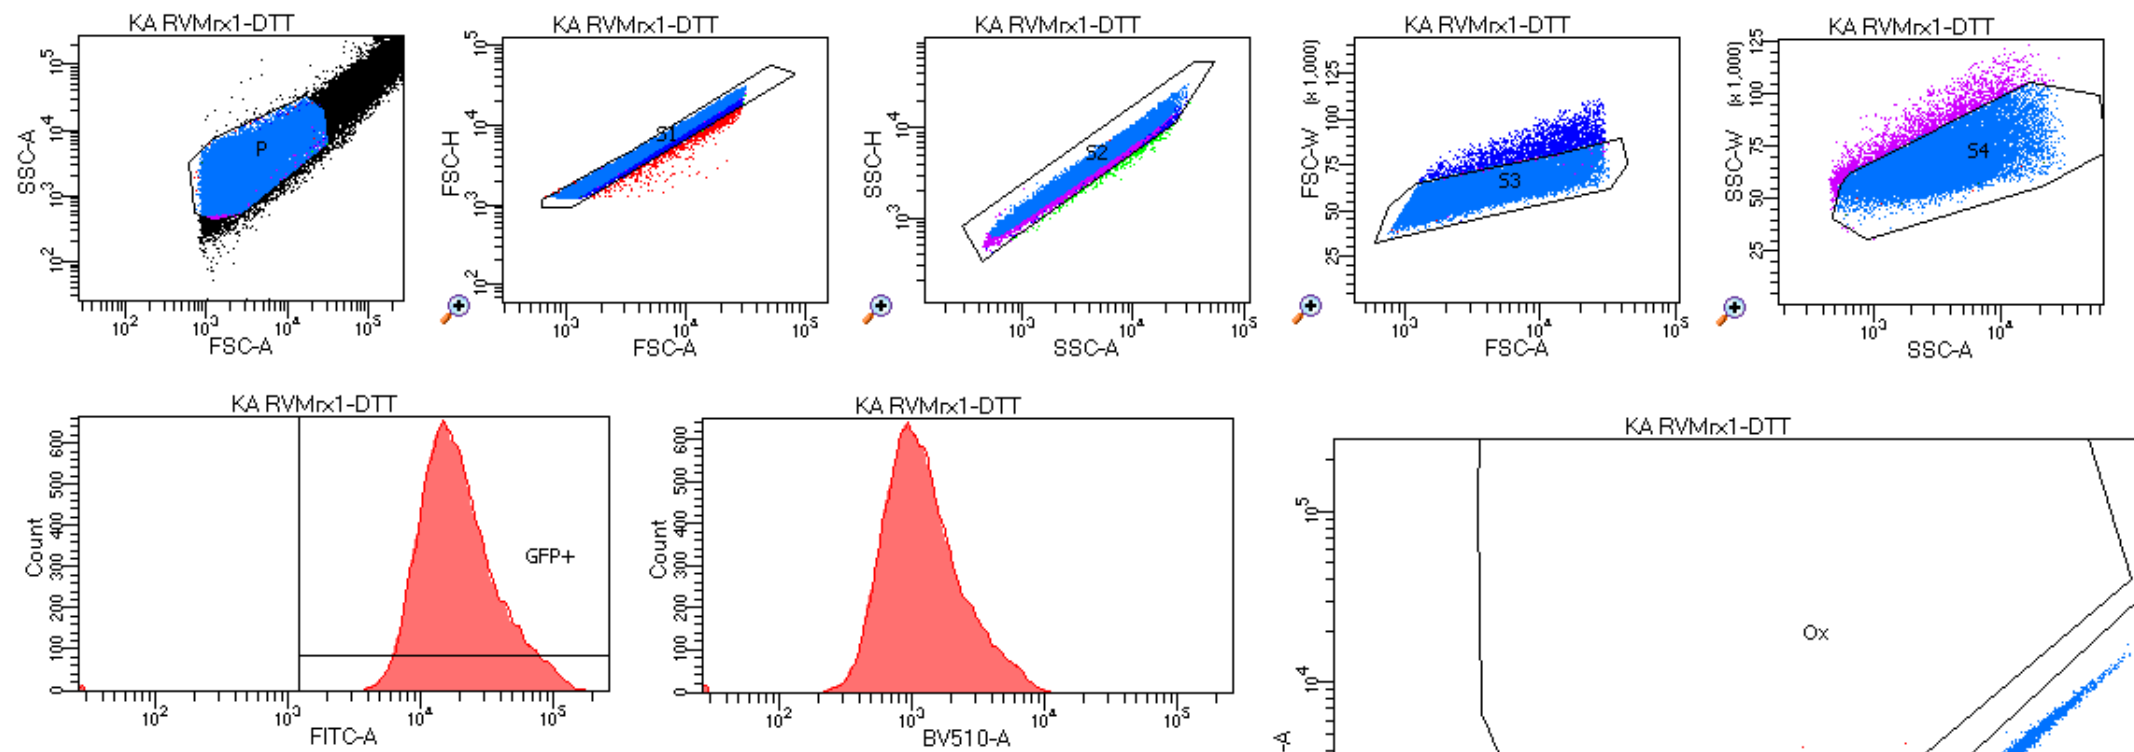

Tube: DTT

| Population | #Events | %Parent | %Total |
|------------|---------|---------|--------|
| All Events | 44,885  | ####    | 100.0  |
| P          | 32,113  | 71.5    | 71.5   |
| S1         | 31,331  | 97.6    | 69.8   |
| S2         | 30,944  | 98.8    | 68.9   |
| S3         | 28,752  | 92.9    | 64.1   |
| S4         | 26,859  | 93.4    | 59.8   |
| GFP+       | 26,635  | 99.2    | 59.3   |
| Ox         | 4       | 0.0     | 0.0    |
| Red        | 26,566  | 99.7    | 59.2   |

|                  |                                    |
|------------------|------------------------------------|
| Experiment Name: | 31Jan2017 Bac sorting              |
| Specimen Name:   | KA RVMrx1                          |
| Tube Name:       | DTT                                |
| Record Date:     | Jan 31, 2017 2:54:50 PM            |
| SOP:             | Administrator                      |
| GUID:            | 48236b22-91eb-4017-b498-f3eb249... |

  

| Population | #Events | %Parent | FITC-A<br>Median | BV510-A<br>Median |
|------------|---------|---------|------------------|-------------------|
| S4         | 26,859  | 93.4    | 17,078           | 1,070             |
| GFP+       | 26,635  | 99.2    | 17,192           | 1,078             |
| Ox         | 4       | 0.0     | 3,658            | 2,314             |
| Red        | 26,566  | 99.7    | 17,214           | 1,079             |

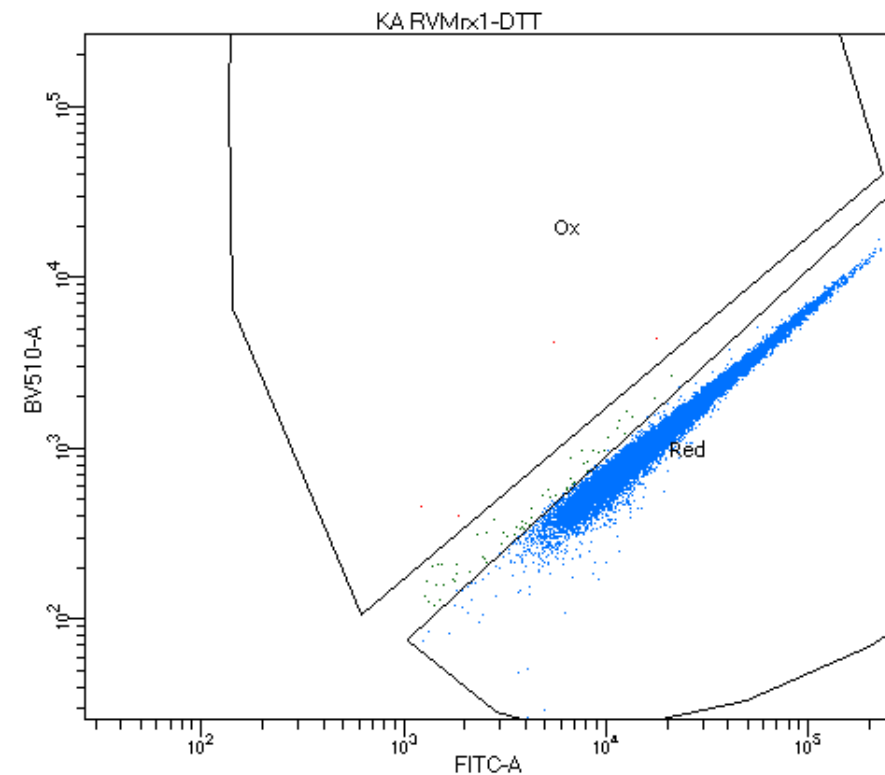

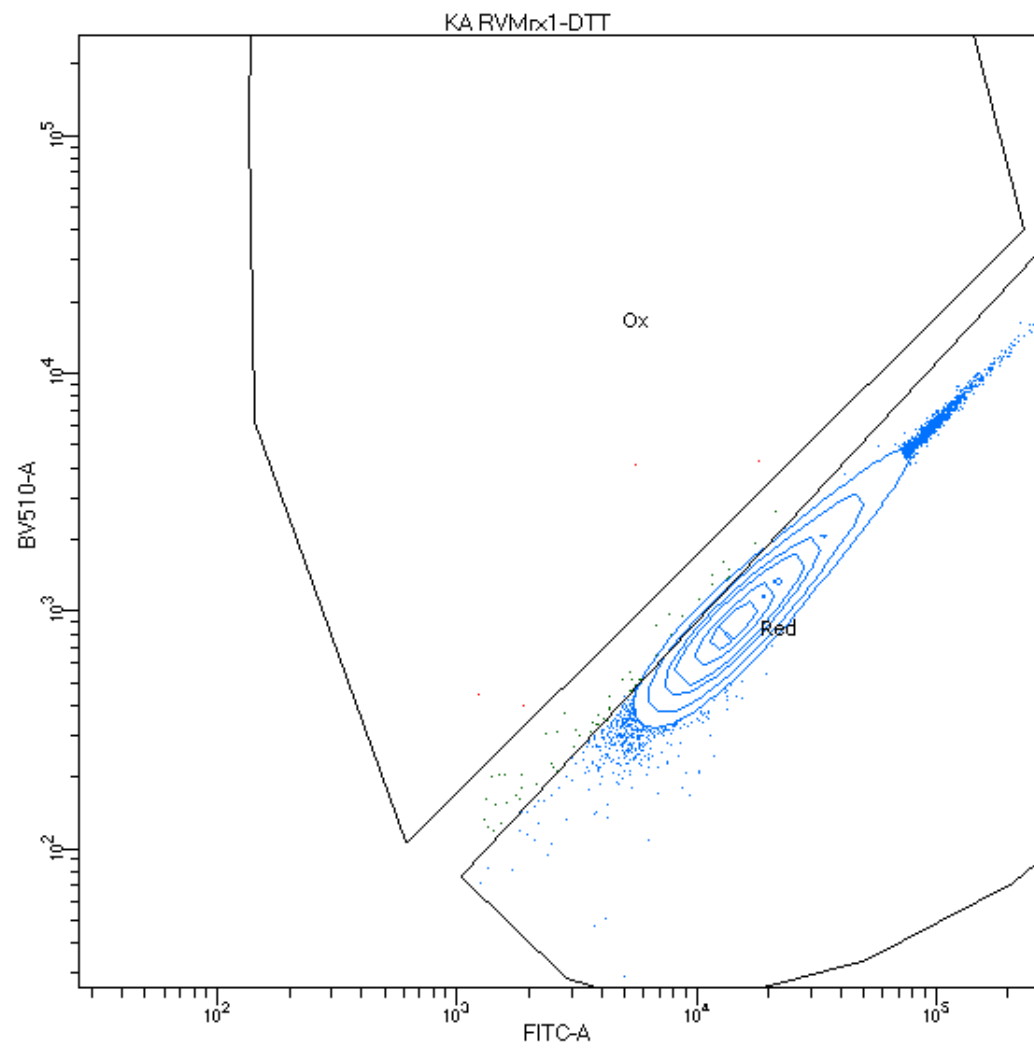



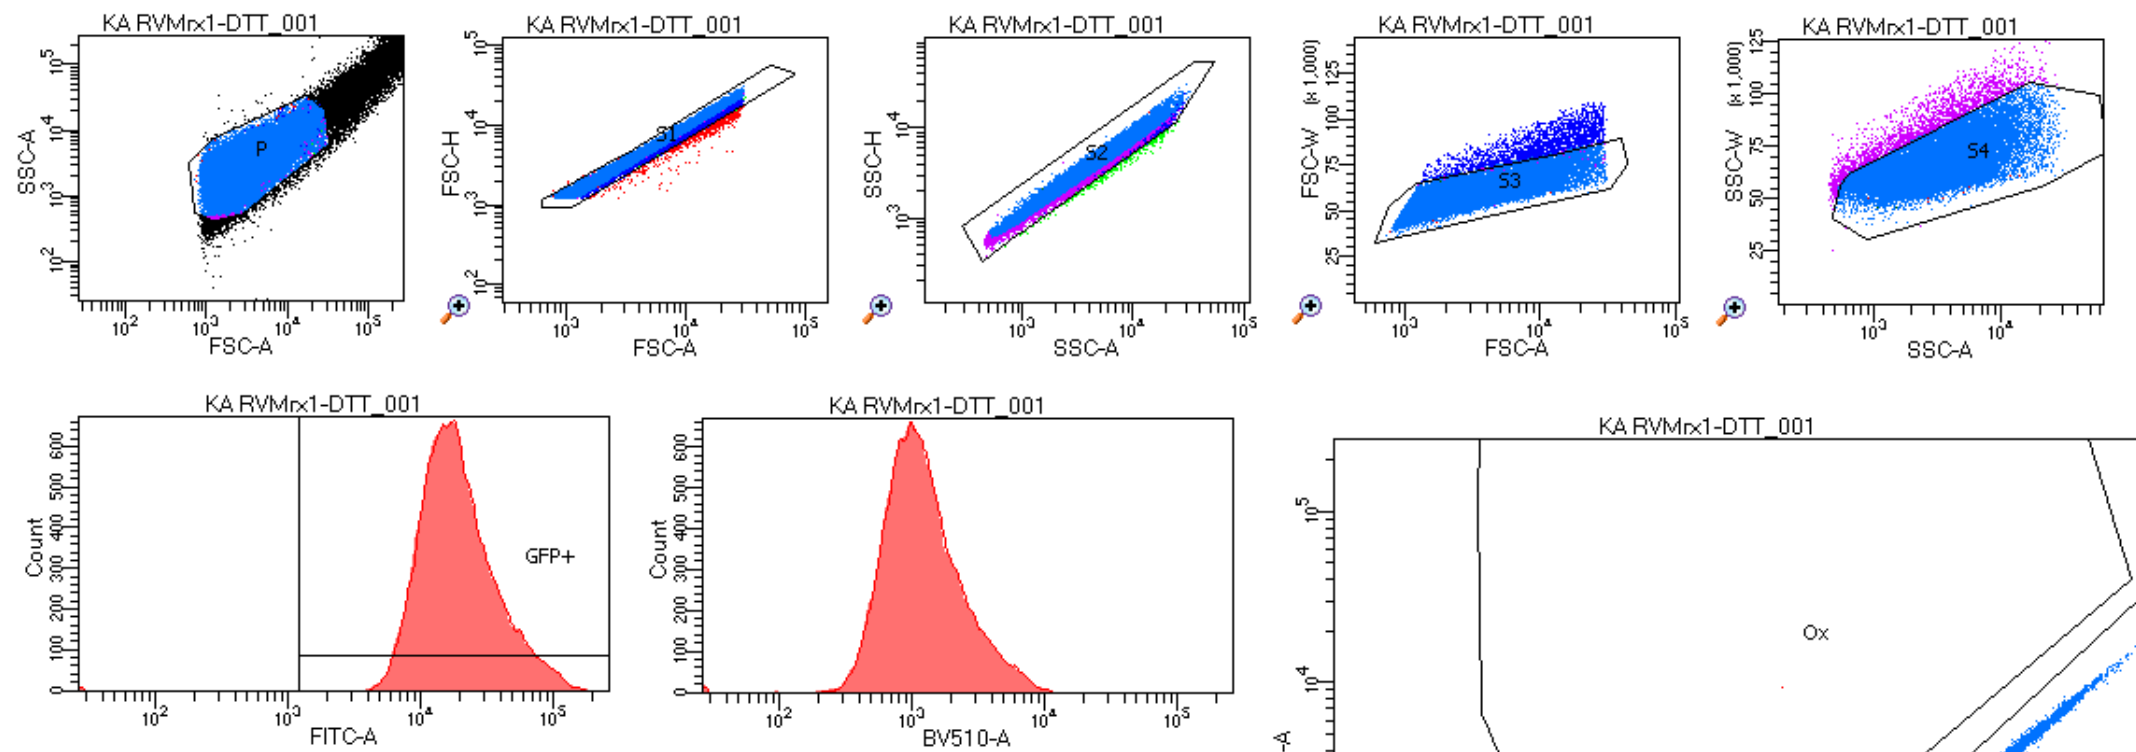

Tube: DTT\_001

| Population | #Events | %Parent | %Total |
|------------|---------|---------|--------|
| All Events | 44,689  | ####    | 100.0  |
| P          | 32,051  | 71.7    | 71.7   |
| S1         | 31,354  | 97.8    | 70.2   |
| S2         | 30,954  | 98.7    | 69.3   |
| S3         | 28,932  | 93.5    | 64.7   |
| S4         | 27,126  | 93.8    | 60.7   |
| GFP+       | 26,896  | 99.2    | 60.2   |
| Ox         | 2       | 0.0     | 0.0    |
| Red        | 26,827  | 99.7    | 60.0   |

Experiment Name: 31Jan2017 Bac sorting  
 Specimen Name: KA RVMrx1  
 Tube Name: DTT\_001  
 Record Date: Jan 31, 2017 2:55:32 PM  
 SOP: Administrator  
 GUID: 730e0b60-bd8d-4b09-a558-1ac167...

| Population | #Events | %Parent | FITC-A<br>Median | BV510-A<br>Median |
|------------|---------|---------|------------------|-------------------|
| S4         | 27,126  | 93.8    | 17,172           | 1,075             |
| GFP+       | 26,896  | 99.2    | 17,273           | 1,081             |
| Ox         | 2       | 0.0     | 11,379           | 6,481             |
| Red        | 26,827  | 99.7    | 17,299           | 1,083             |

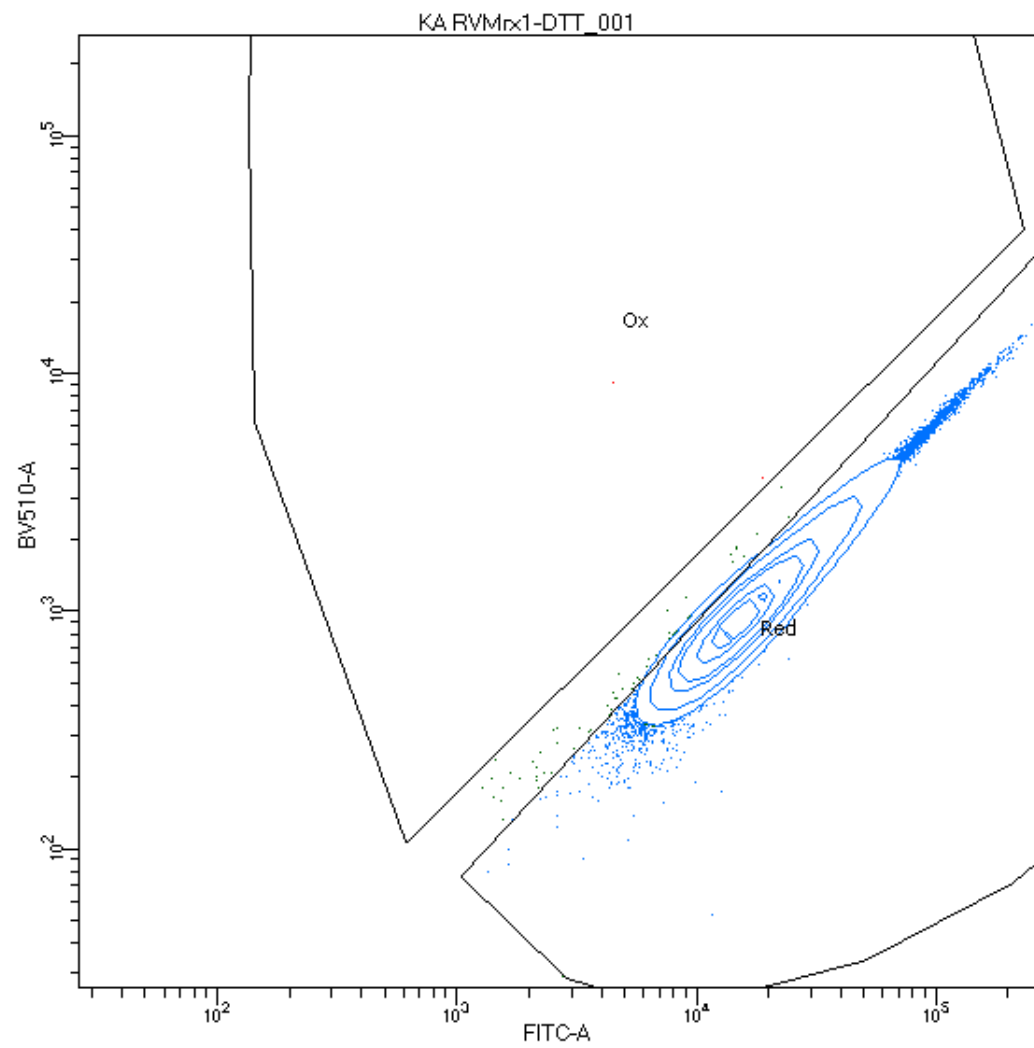

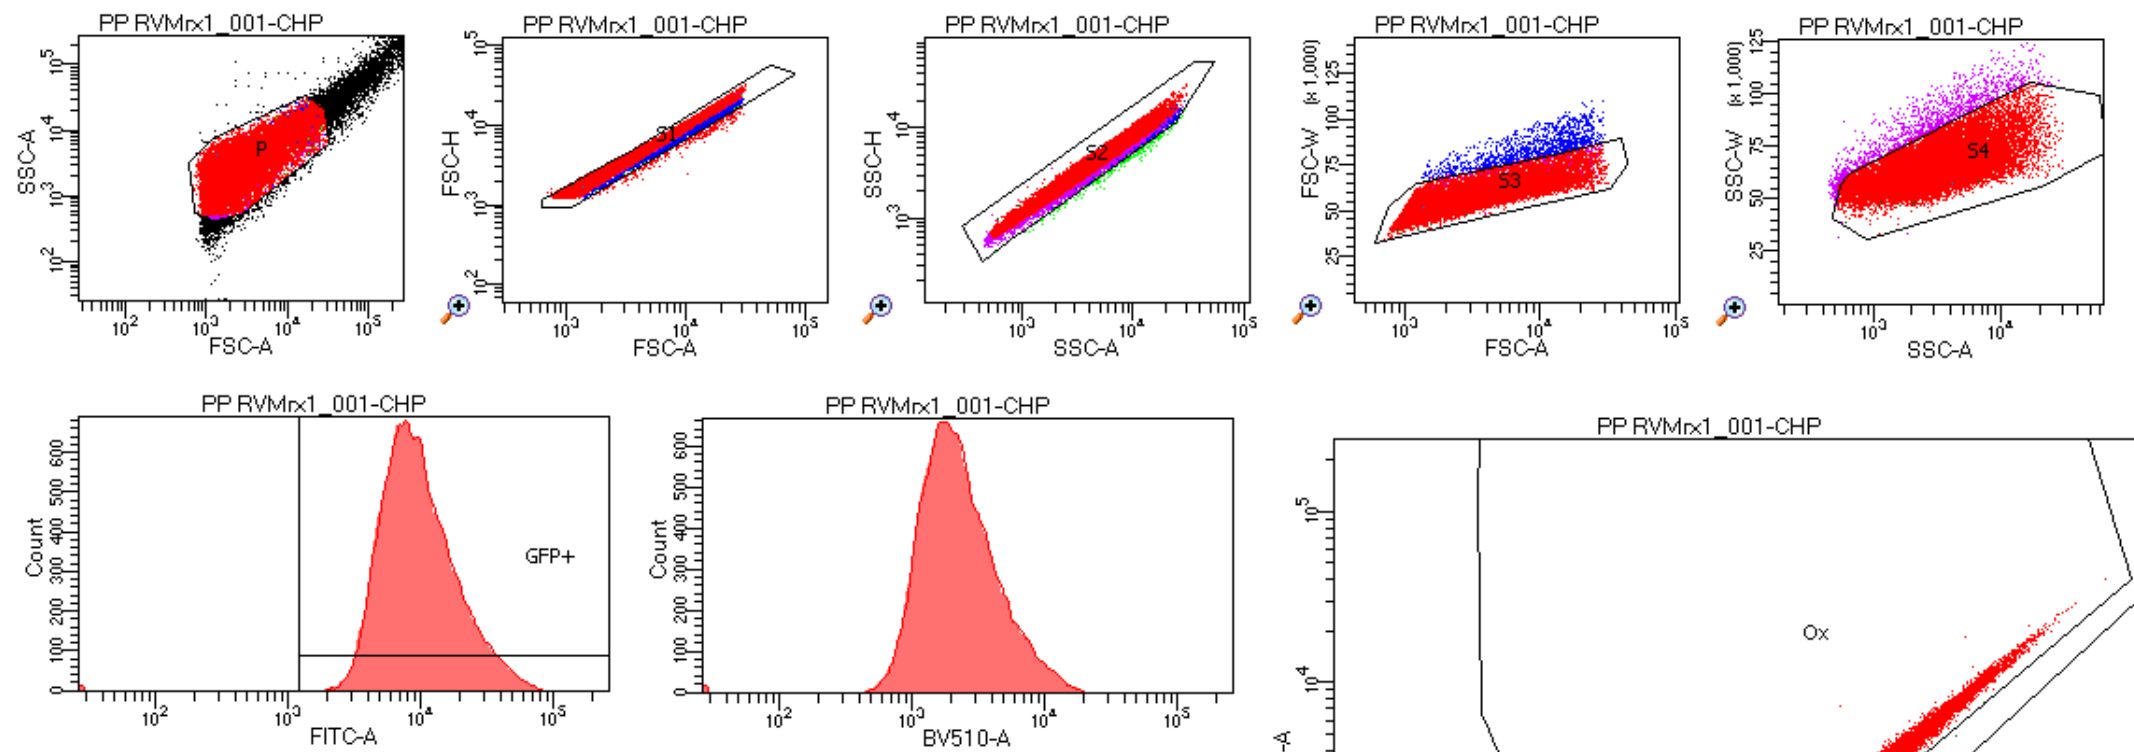

Tube: CHP

| Population | #Events | %Parent | %Total |
|------------|---------|---------|--------|
| All Events | 35,756  | ####    | 100.0  |
| P          | 31,150  | 87.1    | 87.1   |
| S1         | 30,784  | 98.8    | 86.1   |
| S2         | 30,501  | 99.1    | 85.3   |
| S3         | 29,369  | 96.3    | 82.1   |
| S4         | 28,104  | 95.7    | 78.6   |
| GFP+       | 27,912  | 99.3    | 78.1   |
| Ox         | 27,557  | 98.7    | 77.1   |
| Red        | 1       | 0.0     | 0.0    |

|                  |                                    |
|------------------|------------------------------------|
| Experiment Name: | 31Jan2017 Bac sorting              |
| Specimen Name:   | PP RVMrx1_001                      |
| Tube Name:       | CHP                                |
| Record Date:     | Jan 31, 2017 2:58:58 PM            |
| SOP:             | Administrator                      |
| GUID:            | 925a5e5b-f631-4c59-864f-72b4093... |

  

| Population | #Events | %Parent | FITC-A<br>Median | BV510-A<br>Median |
|------------|---------|---------|------------------|-------------------|
| S4         | 28,104  | 95.7    | 8,701            | 2,018             |
| GFP+       | 27,912  | 99.3    | 8,750            | 2,029             |
| Ox         | 27,557  | 98.7    | 8,807            | 2,050             |
| Red        | 1       | 0.0     | 3,763            | 312               |

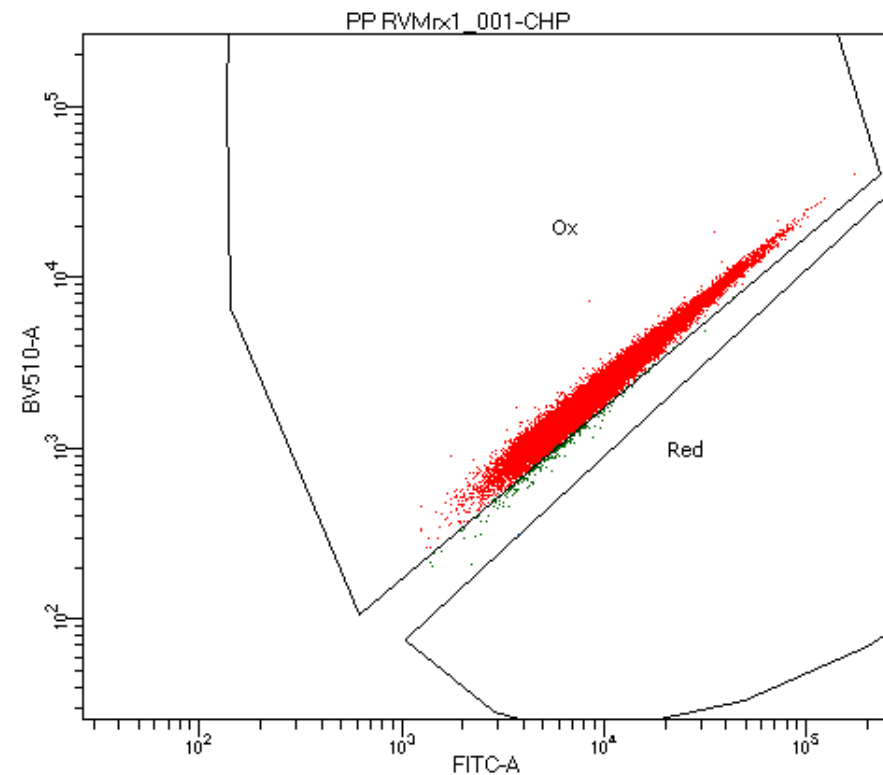

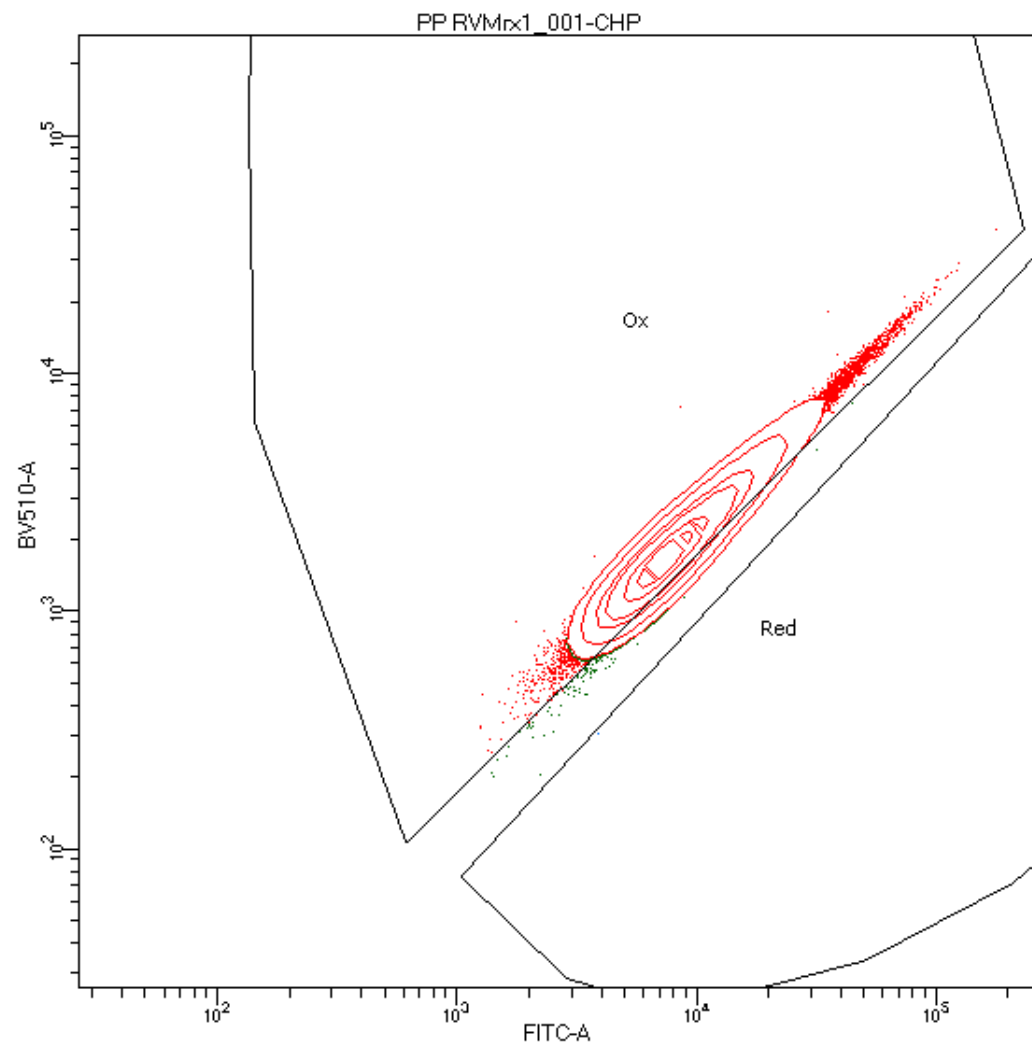

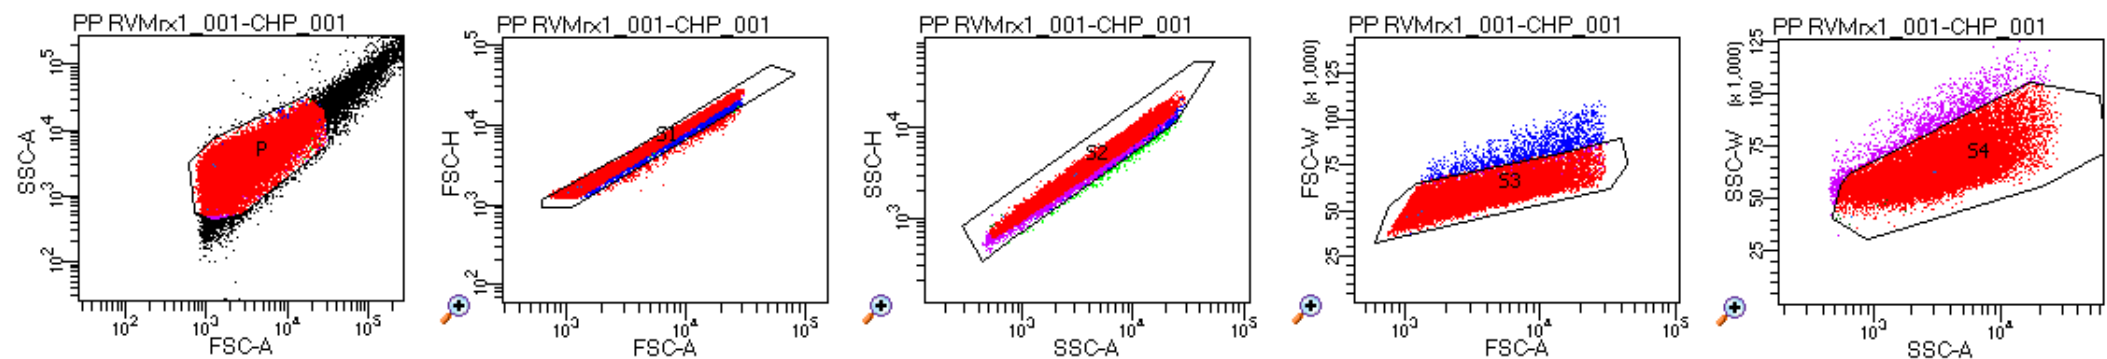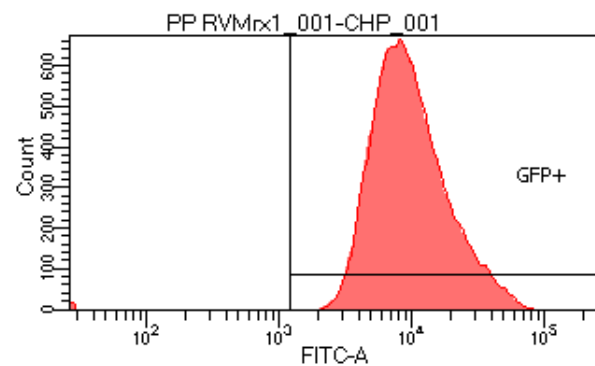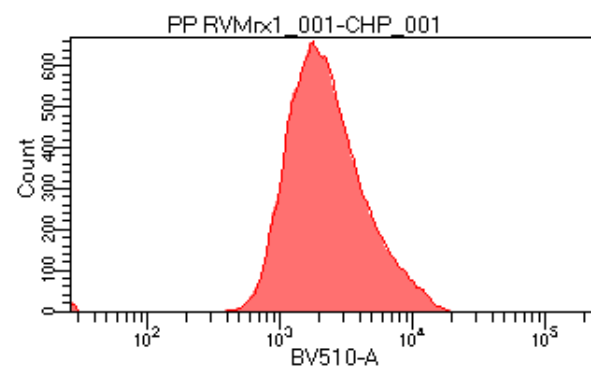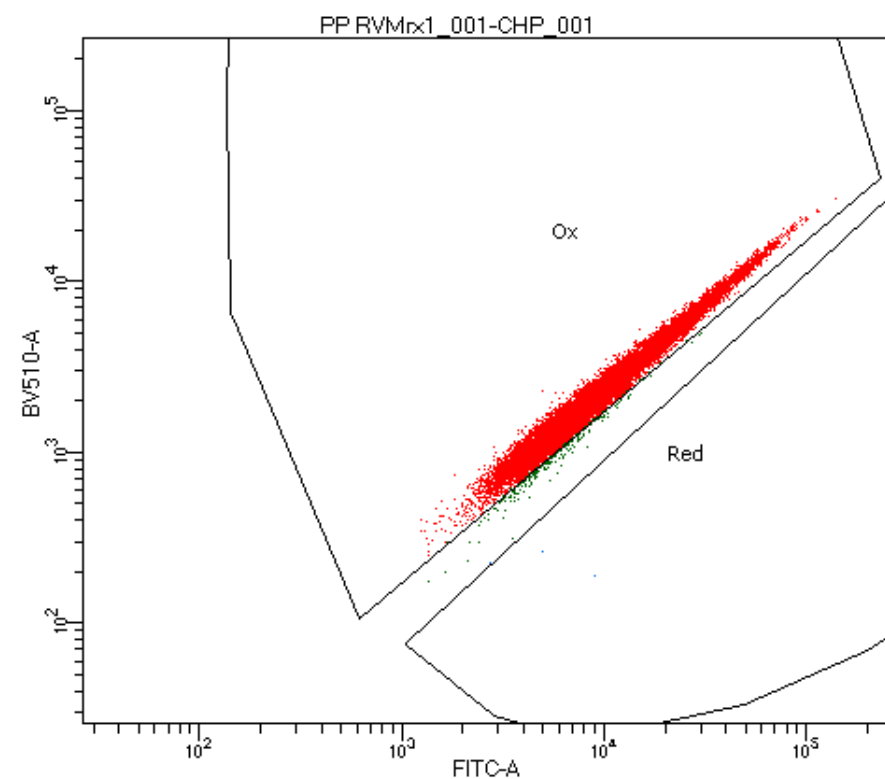

Tube: CHP\_001

| Population | #Events | %Parent | %Total |
|------------|---------|---------|--------|
| All Events | 35,602  | ####    | 100.0  |
| P          | 31,172  | 87.6    | 87.6   |
| S1         | 30,751  | 98.6    | 86.4   |
| S2         | 30,460  | 99.1    | 85.6   |
| S3         | 29,272  | 96.1    | 82.2   |
| S4         | 28,039  | 95.8    | 78.8   |
| GFP+       | 27,826  | 99.2    | 78.2   |
| Ox         | 27,496  | 98.8    | 77.2   |
| Red        | 3       | 0.0     | 0.0    |

Experiment Name: 31Jan2017 Bac sorting  
 Specimen Name: PP RVMrx1\_001  
 Tube Name: CHP\_001  
 Record Date: Jan 31, 2017 2:59:32 PM  
 SOP: Administrator  
 GUID: 89180d18-22f9-471d-8077-9453b80...

| Population | #Events | %Parent | FITC-A<br>Median | BV510-A<br>Median |
|------------|---------|---------|------------------|-------------------|
| S4         | 28,039  | 95.8    | 8,716            | 2,017             |
| GFP+       | 27,826  | 99.2    | 8,765            | 2,027             |
| Ox         | 27,496  | 98.8    | 8,808            | 2,043             |
| Red        | 3       | 0.0     | 4,879            | 224               |

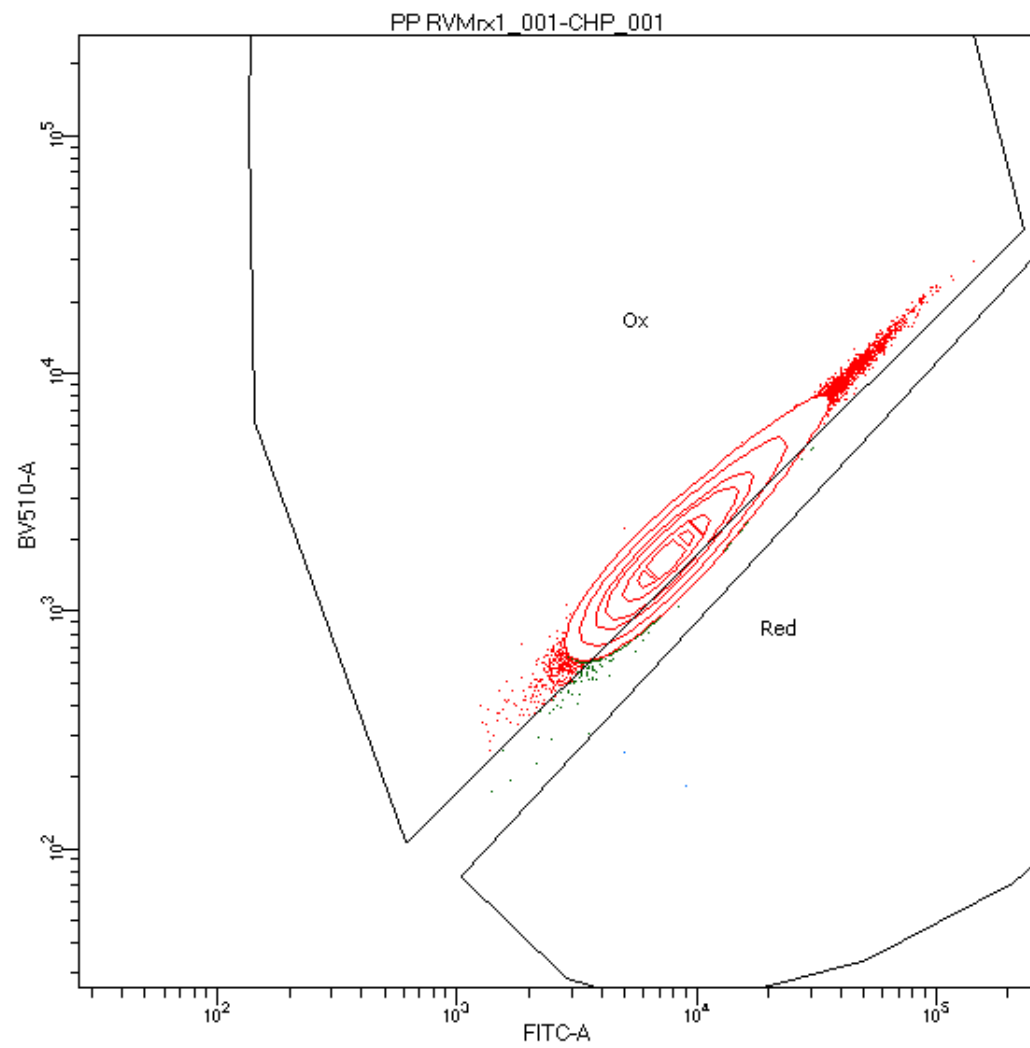

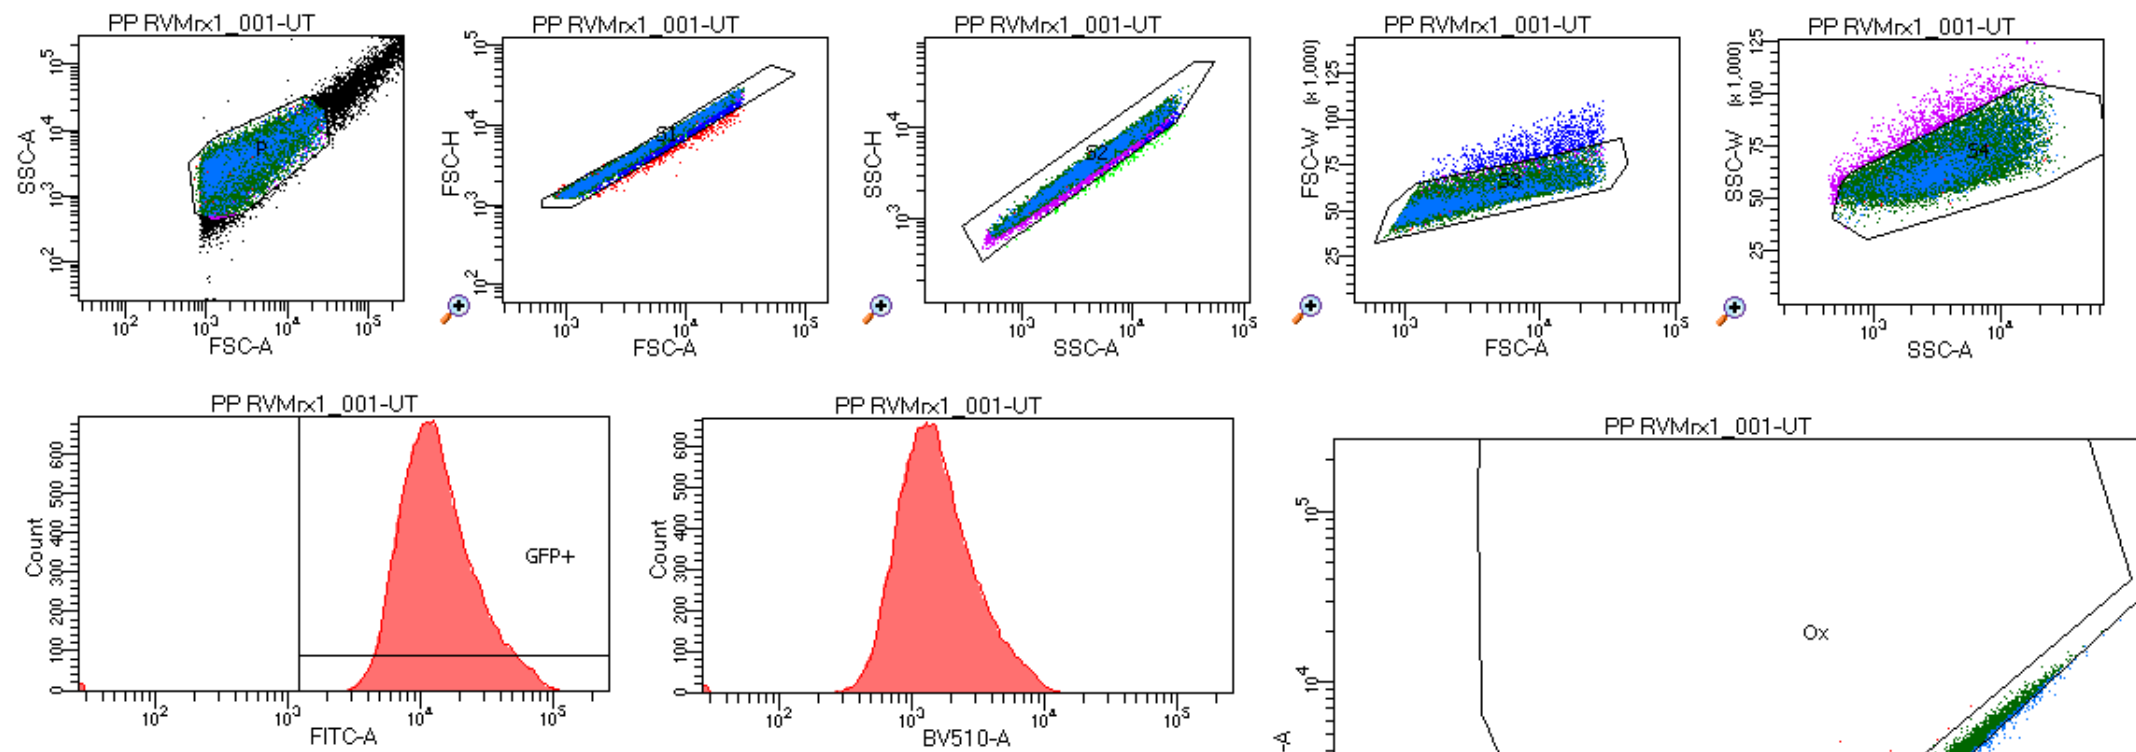

Tube: UT

| Population | #Events | %Parent | %Total |
|------------|---------|---------|--------|
| All Events | 34,532  | ####    | 100.0  |
| P          | 30,909  | 89.5    | 89.5   |
| S1         | 30,553  | 98.8    | 88.5   |
| S2         | 30,334  | 99.3    | 87.8   |
| S3         | 29,516  | 97.3    | 85.5   |
| S4         | 28,449  | 96.4    | 82.4   |
| GFP+       | 28,235  | 99.2    | 81.8   |
| Ox         | 44      | 0.2     | 0.1    |
| Red        | 2,043   | 7.2     | 5.9    |

|                  |                                    |
|------------------|------------------------------------|
| Experiment Name: | 31Jan2017 Bac sorting              |
| Specimen Name:   | PP RVMrx1_001                      |
| Tube Name:       | UT                                 |
| Record Date:     | Jan 31, 2017 2:57:49 PM            |
| SOP:             | Administrator                      |
| GUID:            | 6182d615-c230-49b2-afcd-5411562... |

  

| Population | #Events | %Parent | FITC-A<br>Median | BV510-A<br>Median |
|------------|---------|---------|------------------|-------------------|
| S4         | 28,449  | 96.4    | 12,125           | 1,382             |
| GFP+       | 28,235  | 99.2    | 12,196           | 1,392             |
| Ox         | 44      | 0.2     | 7,683            | 1,611             |
| Red        | 2,043   | 7.2     | 13,820           | 1,248             |

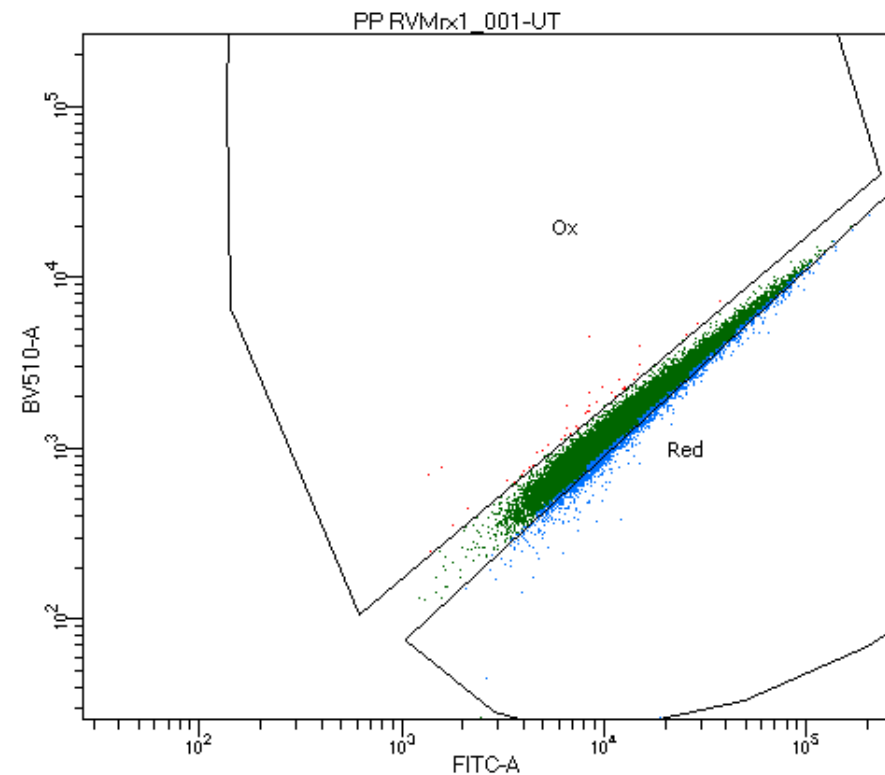

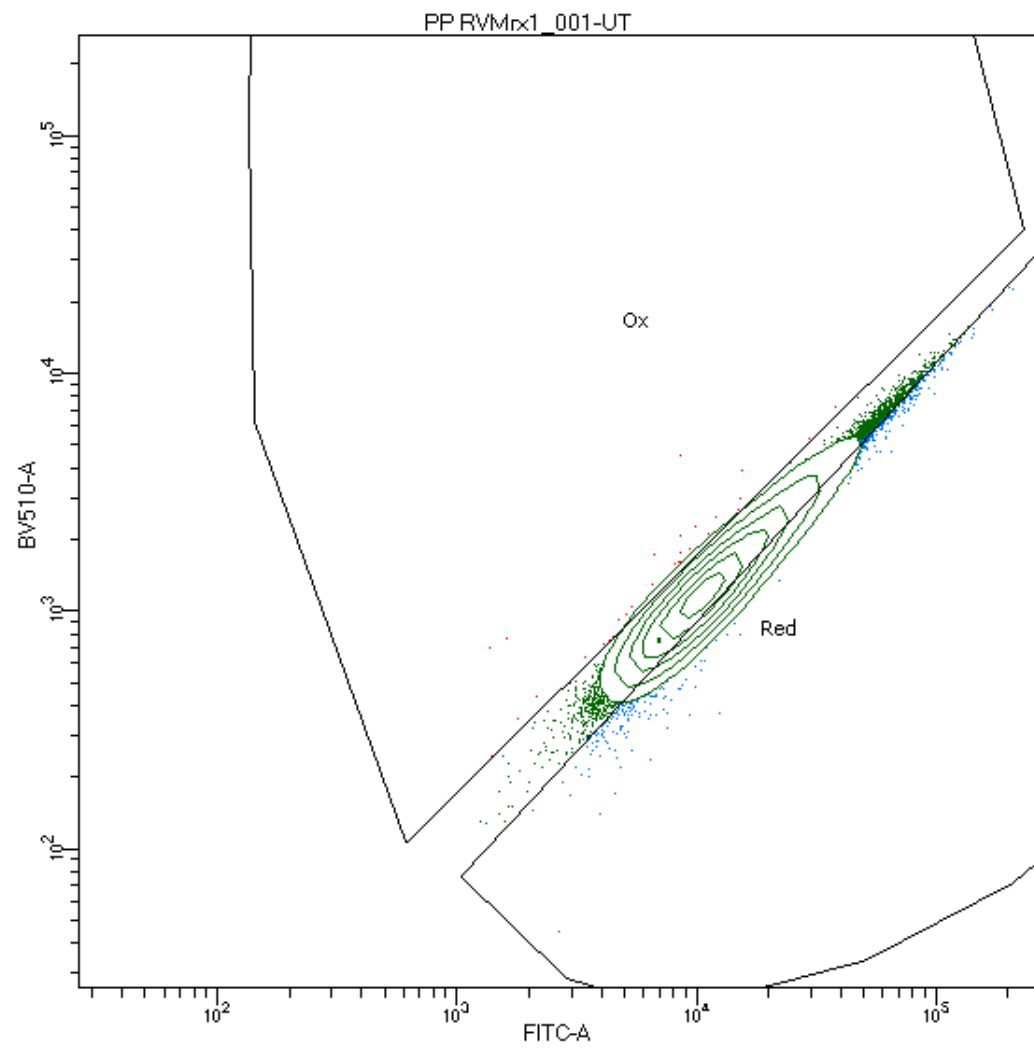



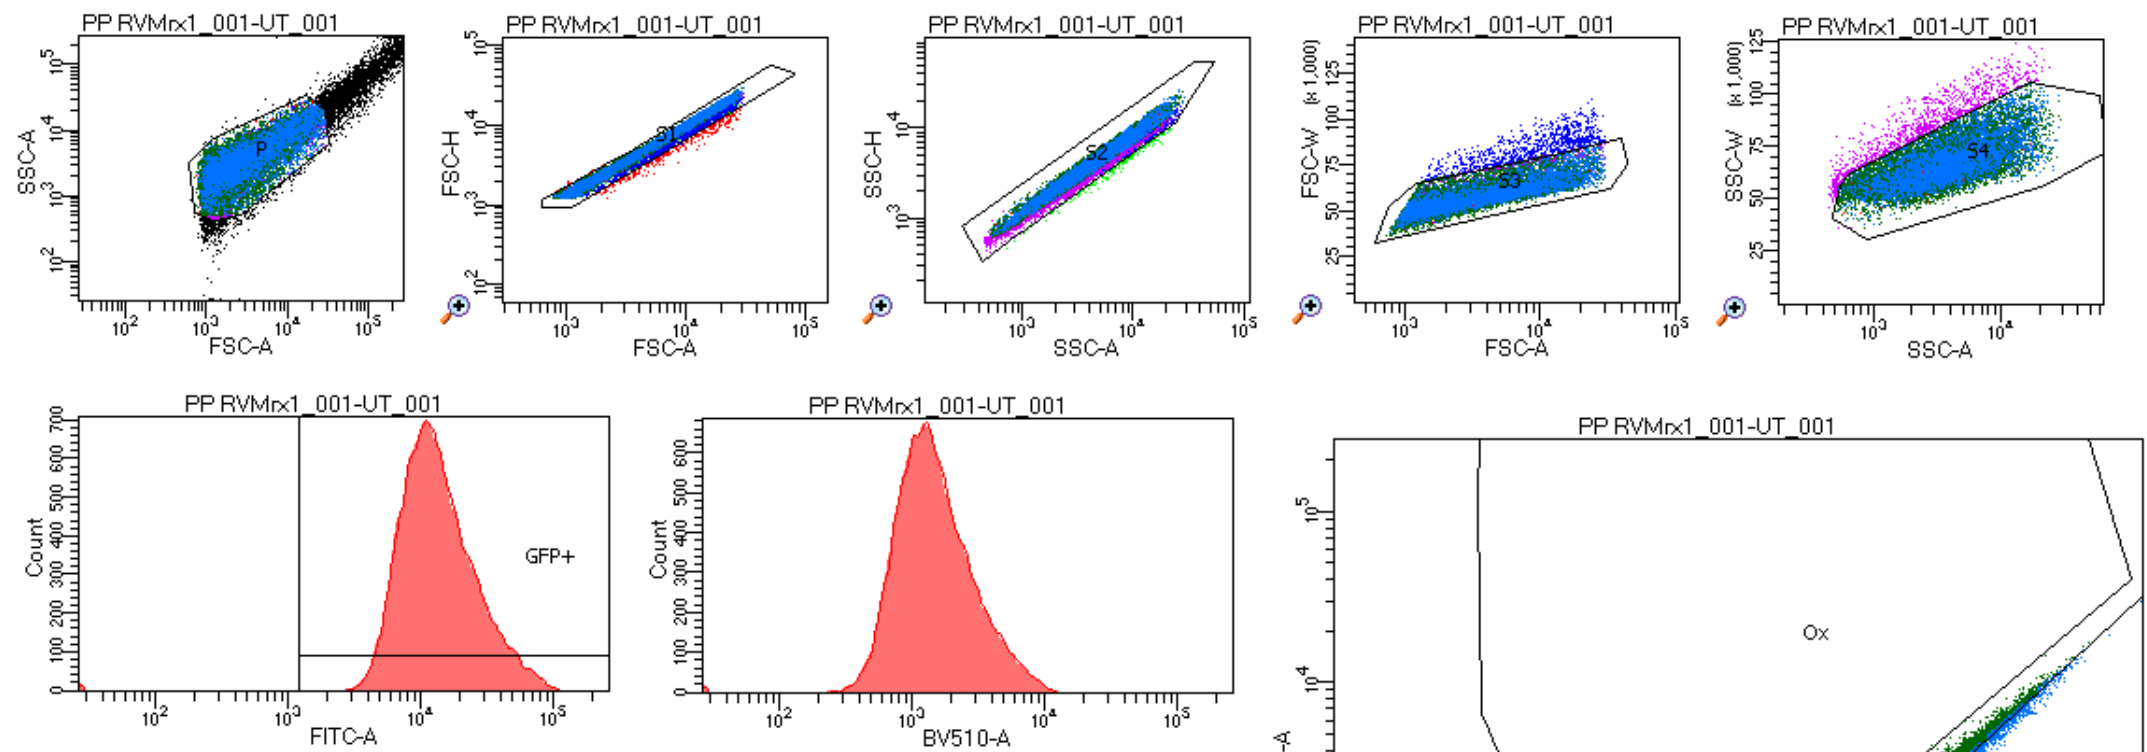

Tube: UT\_001

| Population | #Events | %Parent | %Total |
|------------|---------|---------|--------|
| All Events | 35,007  | ####    | 100.0  |
| P          | 30,900  | 88.3    | 88.3   |
| S1         | 30,542  | 98.8    | 87.2   |
| S2         | 30,331  | 99.3    | 86.6   |
| S3         | 29,463  | 97.1    | 84.2   |
| S4         | 28,399  | 96.4    | 81.1   |
| GFP+       | 28,206  | 99.3    | 80.6   |
| Ox         | 27      | 0.1     | 0.1    |
| Red        | 4,271   | 15.1    | 12.2   |

|                  |                                    |
|------------------|------------------------------------|
| Experiment Name: | 31Jan2017 Bac sorting              |
| Specimen Name:   | PP RVMrx1_001                      |
| Tube Name:       | UT_001                             |
| Record Date:     | Jan 31, 2017 2:58:23 PM            |
| SOP:             | Administrator                      |
| GUID:            | 11f6b488-1989-4136-8008-bd4b37b... |

  

| Population | #Events | %Parent | FITC-A<br>Median | BV510-A<br>Median |
|------------|---------|---------|------------------|-------------------|
| S4         | 28,399  | 96.4    | 12,133           | 1,318             |
| GFP+       | 28,206  | 99.3    | 12,200           | 1,324             |
| Ox         | 27      | 0.1     | 6,650            | 1,524             |
| Red        | 4,271   | 15.1    | 16,015           | 1,494             |

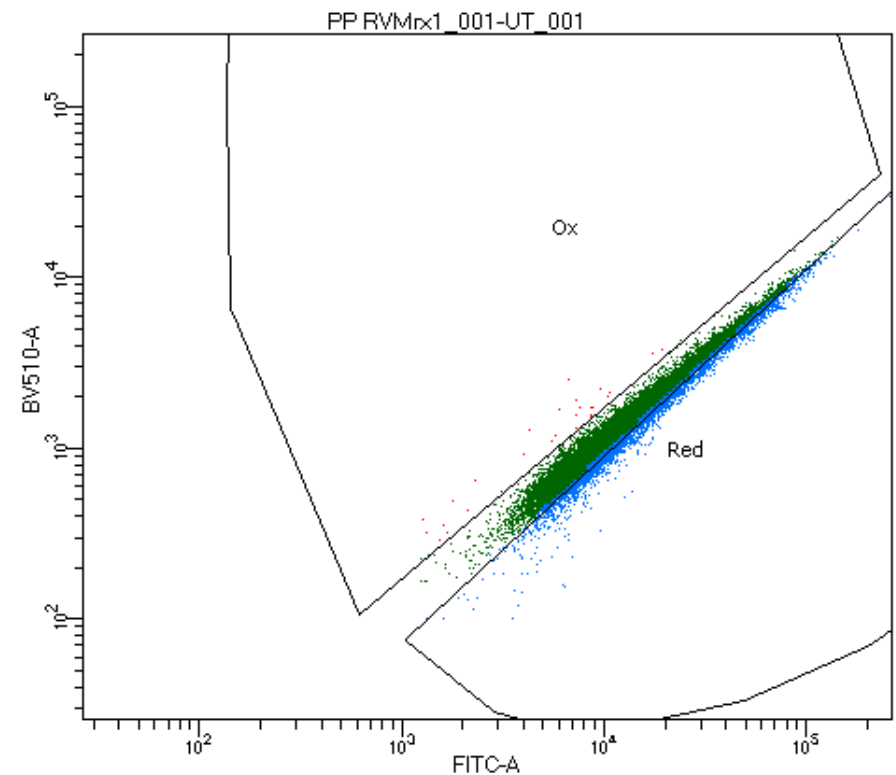

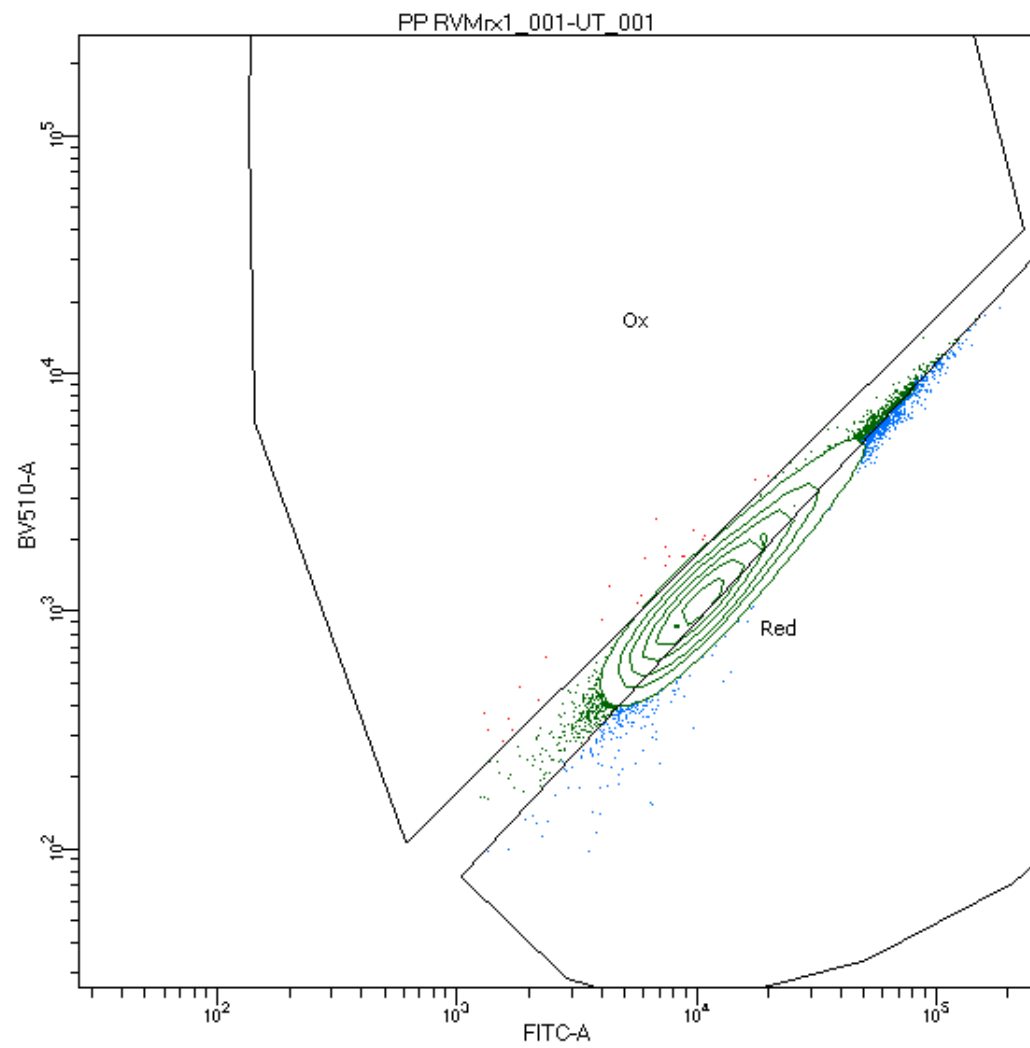

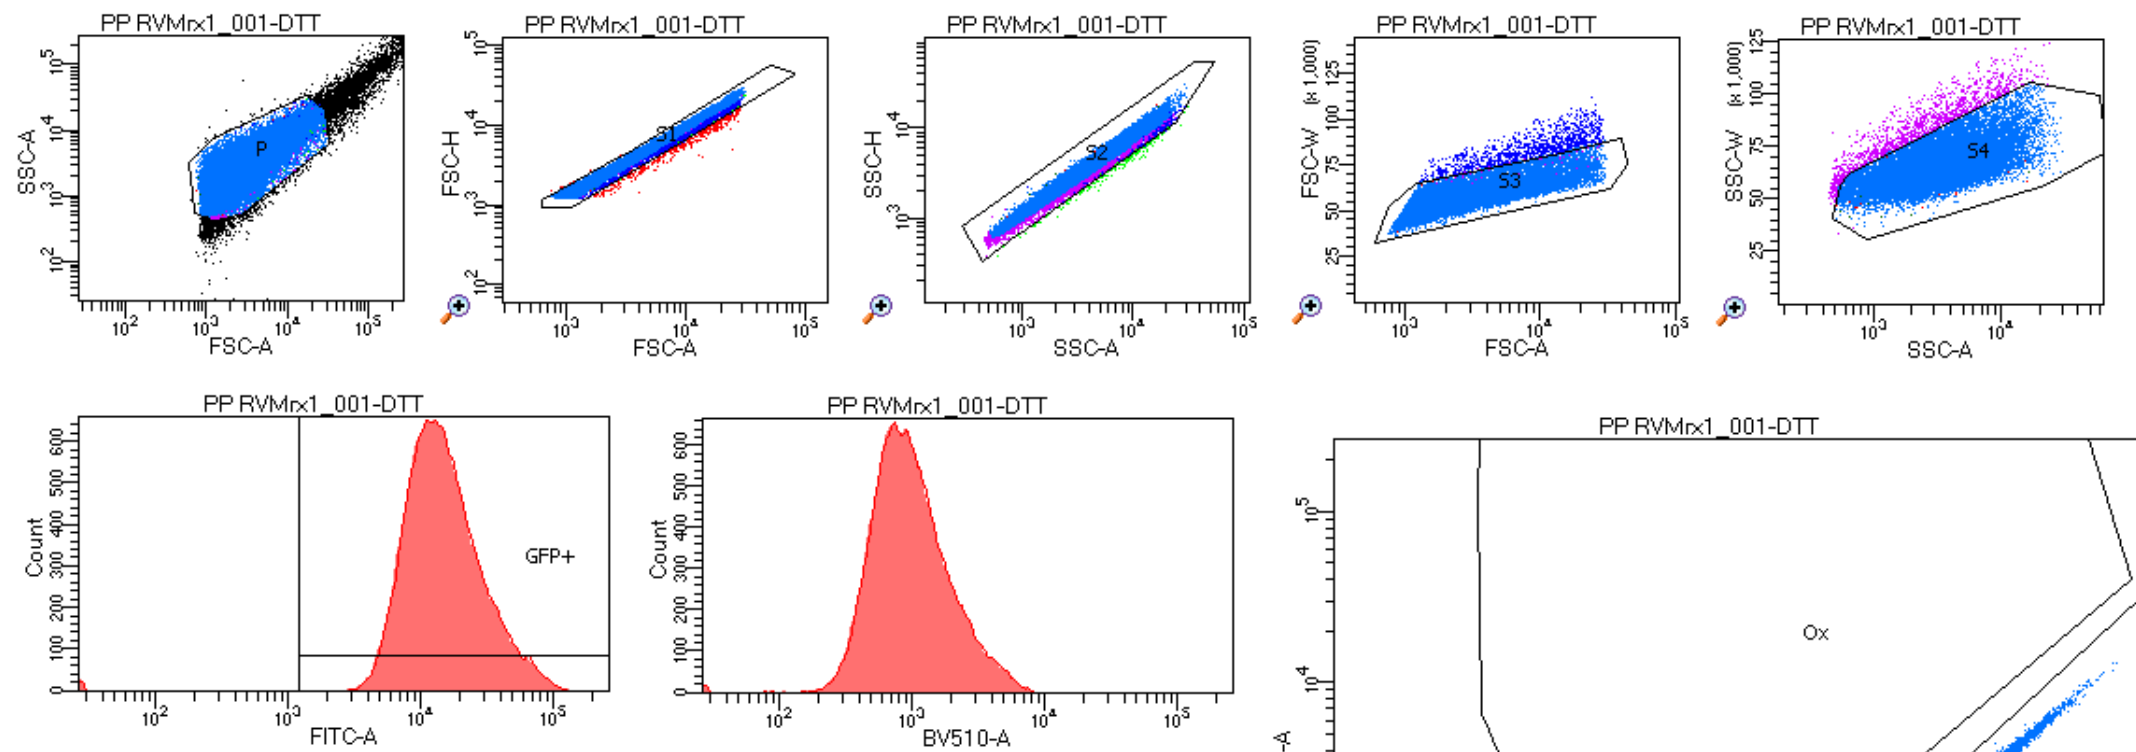

Tube: DTT

| Population | #Events | %Parent | %Total |
|------------|---------|---------|--------|
| All Events | 34,972  | ####    | 100.0  |
| P          | 31,053  | 88.8    | 88.8   |
| S1         | 30,606  | 98.6    | 87.5   |
| S2         | 30,329  | 99.1    | 86.7   |
| S3         | 29,291  | 96.6    | 83.8   |
| S4         | 28,116  | 96.0    | 80.4   |
| GFP+       | 27,882  | 99.2    | 79.7   |
| Ox         | 2       | 0.0     | 0.0    |
| Red        | 27,740  | 99.5    | 79.3   |

|                  |                                    |
|------------------|------------------------------------|
| Experiment Name: | 31Jan2017 Bac sorting              |
| Specimen Name:   | PP RVMrx1_001                      |
| Tube Name:       | DTT                                |
| Record Date:     | Jan 31, 2017 2:56:37 PM            |
| SOP:             | Administrator                      |
| GUID:            | c0f460a6-d2f6-47bc-a856-a797893... |

  

| Population | #Events | %Parent | FITC-A<br>Median | BV510-A<br>Median |
|------------|---------|---------|------------------|-------------------|
| S4         | 28,116  | 96.0    | 13,533           | 876               |
| GFP+       | 27,882  | 99.2    | 13,620           | 882               |
| Ox         | 2       | 0.0     | 3,603            | 936               |
| Red        | 27,740  | 99.5    | 13,690           | 885               |

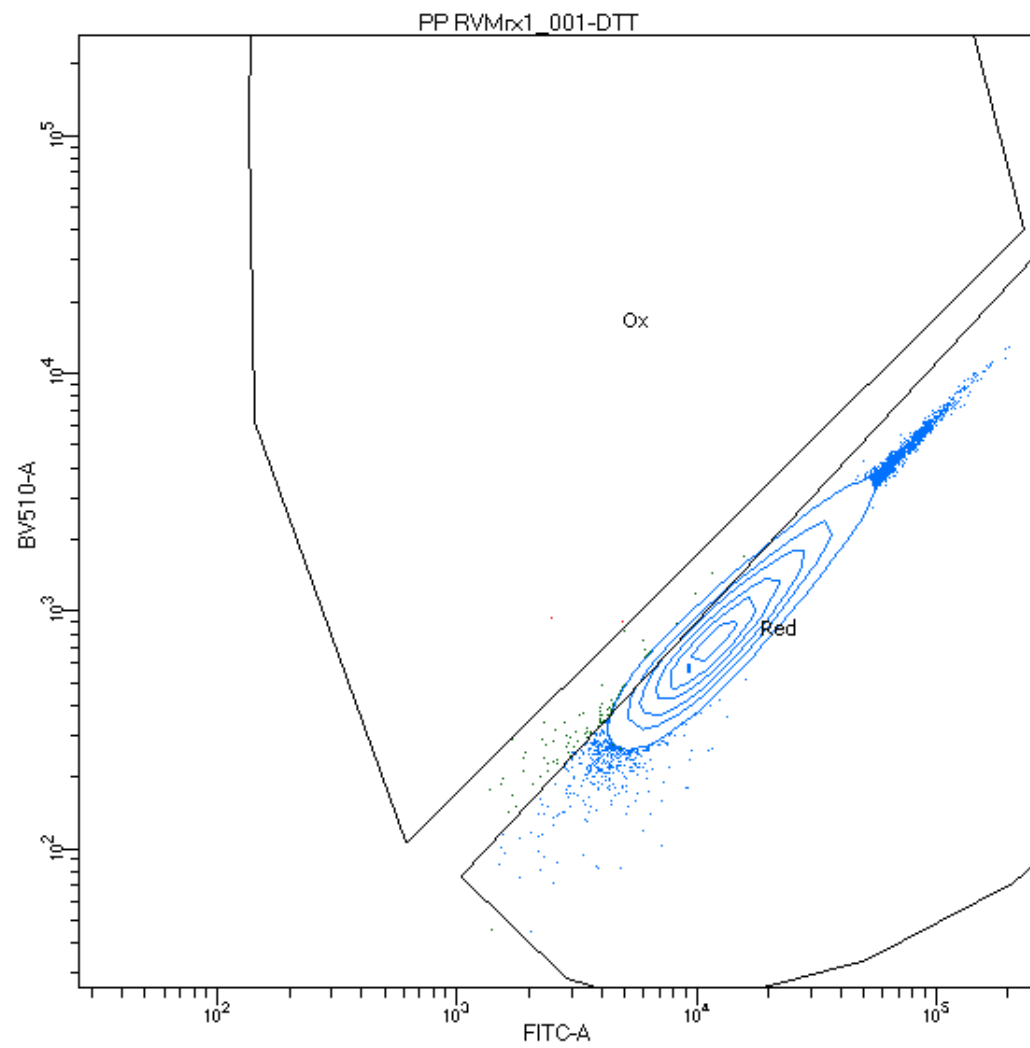

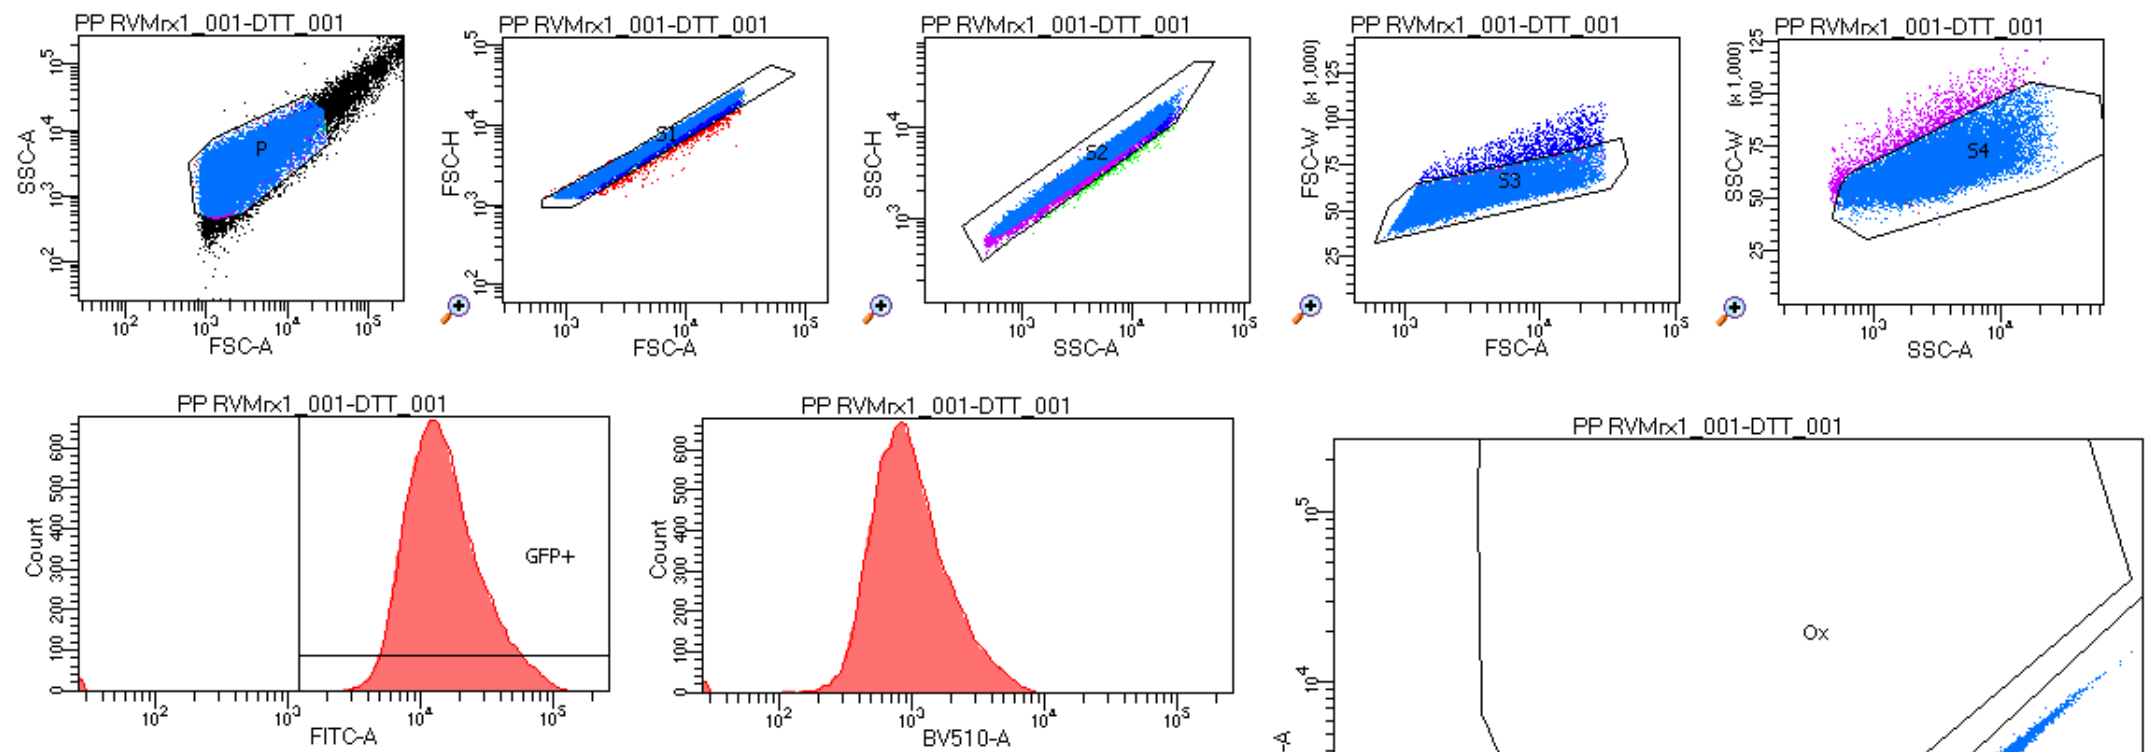

Tube: DTT\_001

| Population | #Events | %Parent | %Total |
|------------|---------|---------|--------|
| All Events | 34,653  | ####    | 100.0  |
| P          | 31,003  | 89.5    | 89.5   |
| S1         | 30,575  | 98.6    | 88.2   |
| S2         | 30,331  | 99.2    | 87.5   |
| S3         | 29,303  | 96.6    | 84.6   |
| S4         | 28,108  | 95.9    | 81.1   |
| GFP+       | 27,834  | 99.0    | 80.3   |
| Ox         | 1       | 0.0     | 0.0    |
| Red        | 27,687  | 99.5    | 79.9   |

| Experiment Name: | 31Jan2017 Bac sorting              |         |                  |                   |
|------------------|------------------------------------|---------|------------------|-------------------|
| Specimen Name:   | PP RVMrx1_001                      |         |                  |                   |
| Tube Name:       | DTT_001                            |         |                  |                   |
| Record Date:     | Jan 31, 2017 2:57:10 PM            |         |                  |                   |
| SOP:             | Administrator                      |         |                  |                   |
| GUID:            | d32b9670-0c53-4d5a-a155-20fbb02... |         |                  |                   |
| Population       | #Events                            | %Parent | FITC-A<br>Median | BV510-A<br>Median |
| S4               | 28,108                             | 95.9    | 13,441           | 869               |
| GFP+             | 27,834                             | 99.0    | 13,540           | 875               |
| Ox               | 1                                  | 0.0     | 10,401           | 1,873             |
| Red              | 27,687                             | 99.5    | 13,600           | 878               |

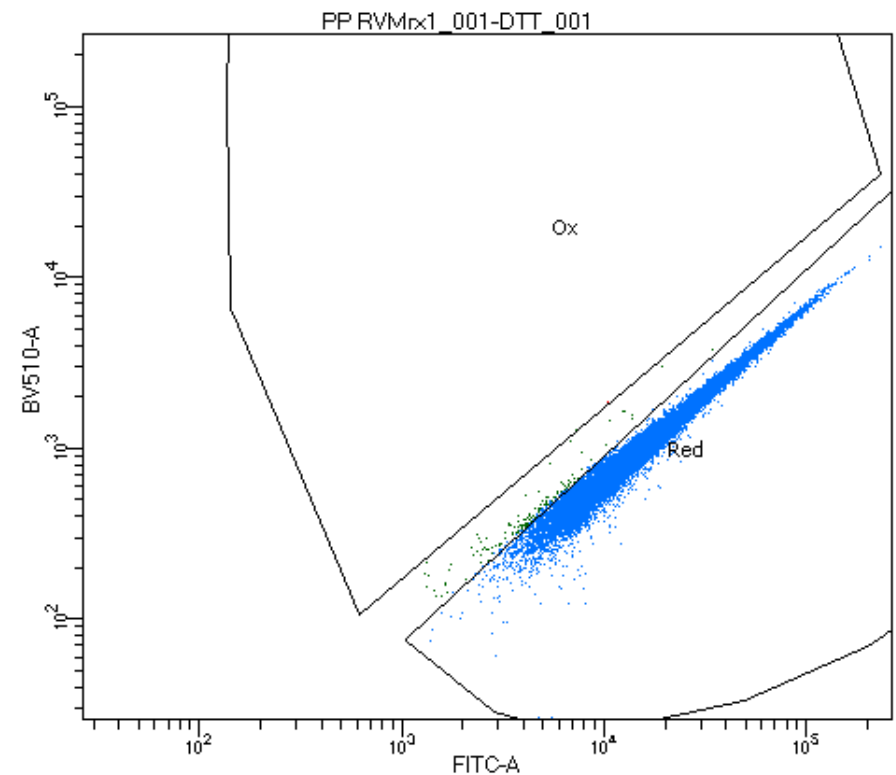

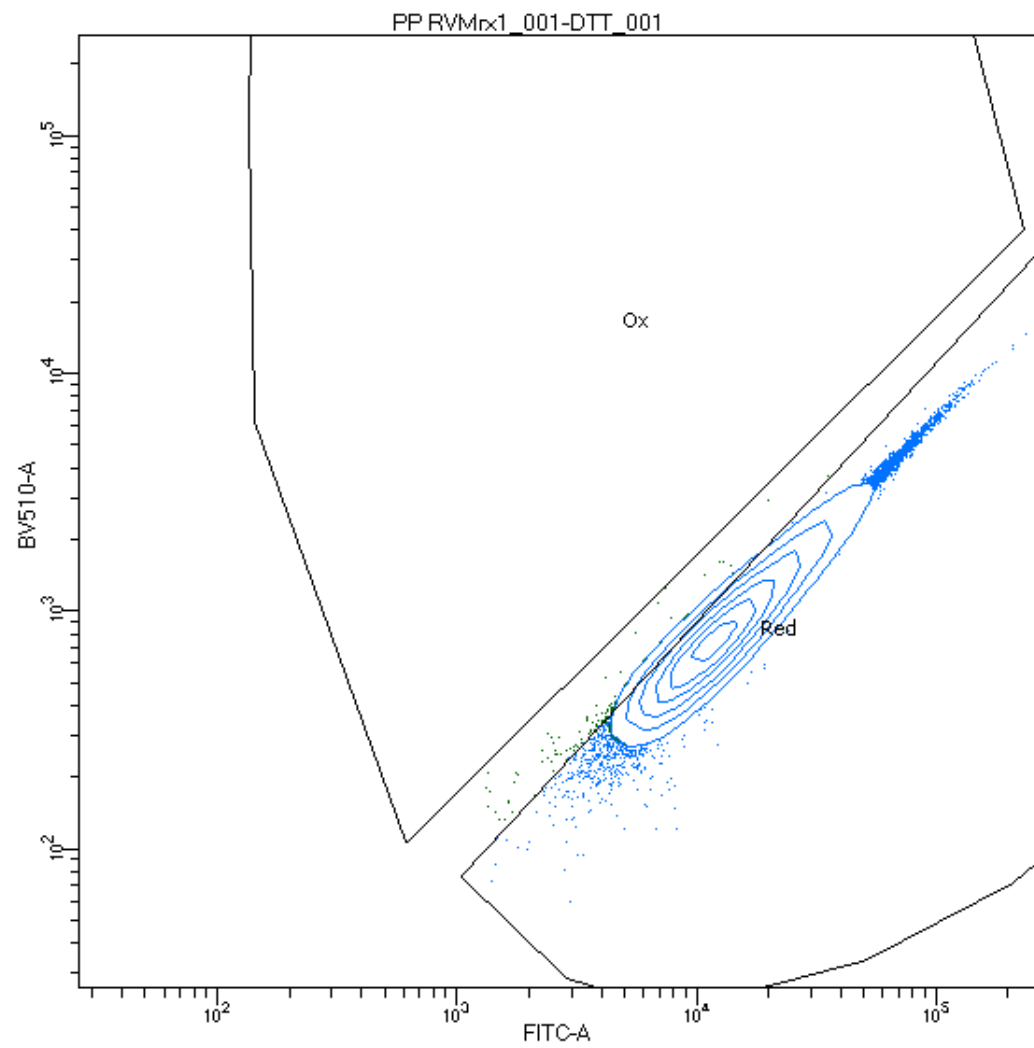

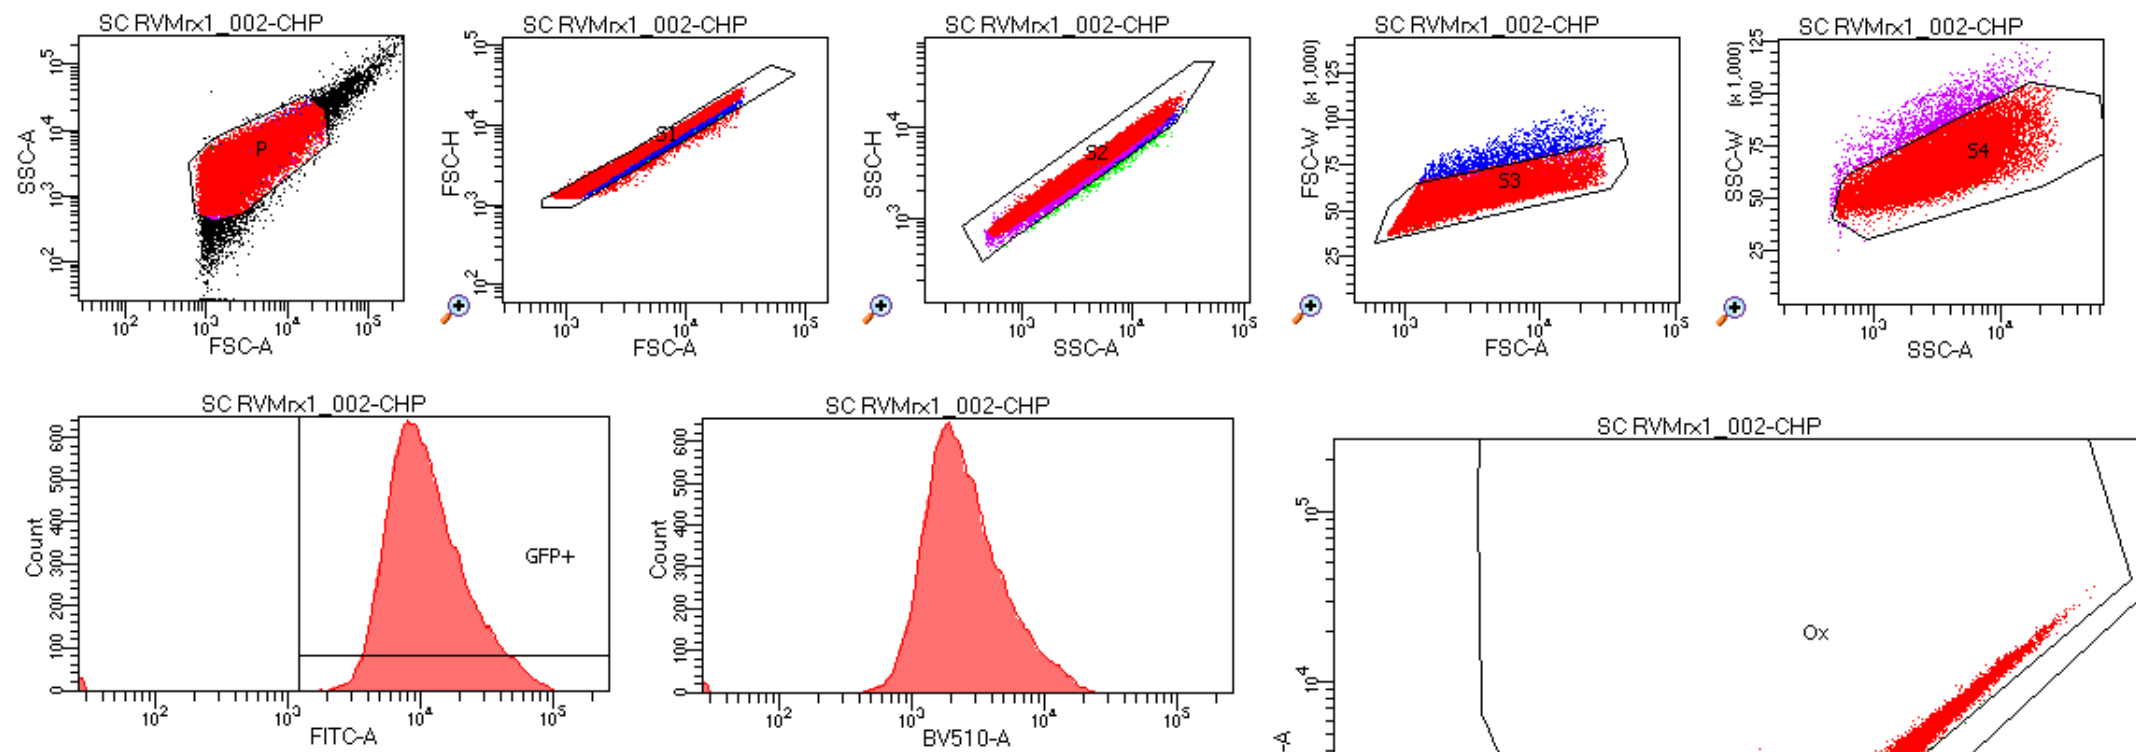

Tube: CHP

| Population | #Events | %Parent | %Total |
|------------|---------|---------|--------|
| All Events | 33,467  | ####    | 100.0  |
| P          | 30,906  | 92.3    | 92.3   |
| S1         | 30,351  | 98.2    | 90.7   |
| S2         | 29,993  | 98.8    | 89.6   |
| S3         | 28,633  | 95.5    | 85.6   |
| S4         | 27,000  | 94.3    | 80.7   |
| GFP+       | 26,842  | 99.4    | 80.2   |
| Ox         | 26,199  | 97.6    | 78.3   |
| Red        | 1       | 0.0     | 0.0    |

|                  |                                    |
|------------------|------------------------------------|
| Experiment Name: | 31Jan2017 Bac sorting              |
| Specimen Name:   | SC RVMrx1_002                      |
| Tube Name:       | CHP                                |
| Record Date:     | Jan 31, 2017 3:01:35 PM            |
| SOP:             | Administrator                      |
| GUID:            | be779ee7-cc8f-4b7d-9d3e-4ad3c2d... |

  

| Population | #Events | %Parent | FITC-A<br>Median | BV510-A<br>Median |
|------------|---------|---------|------------------|-------------------|
| S4         | 27,000  | 94.3    | 9,903            | 2,207             |
| GFP+       | 26,842  | 99.4    | 9,953            | 2,216             |
| Ox         | 26,199  | 97.6    | 10,084           | 2,254             |
| Red        | 1       | 0.0     | 4,114            | 331               |

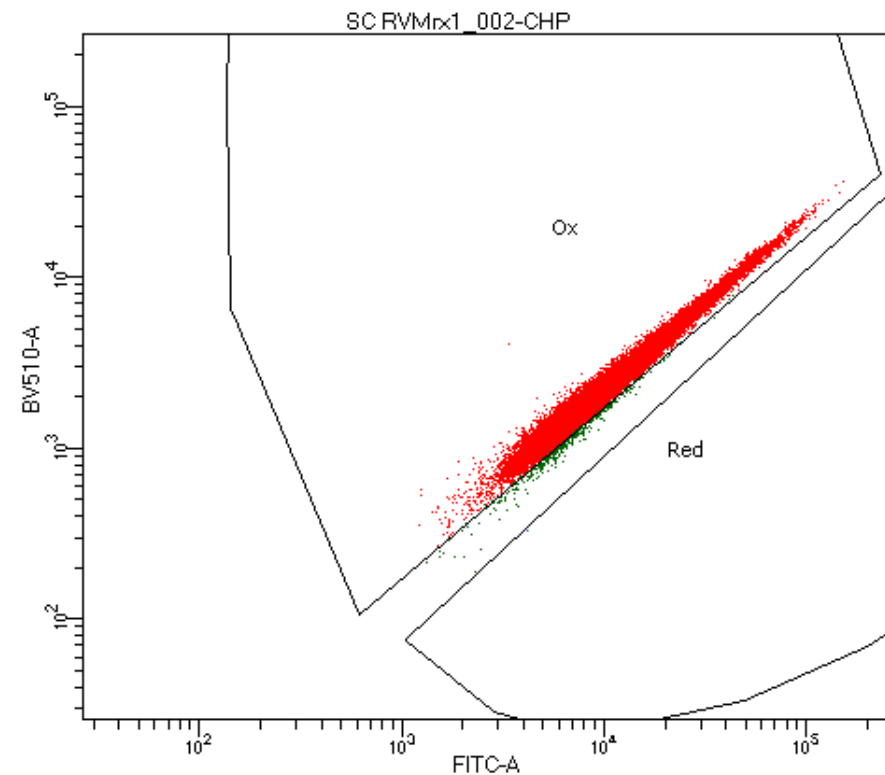

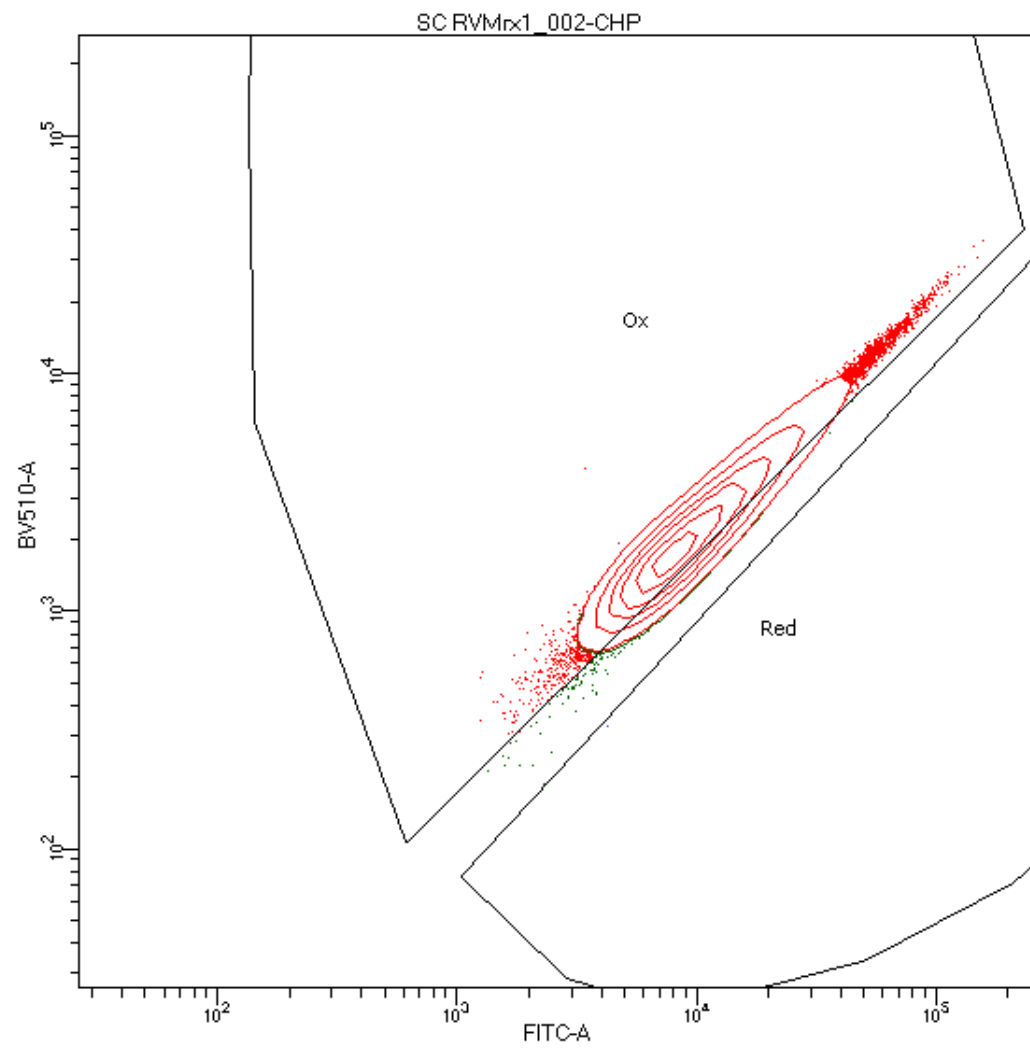



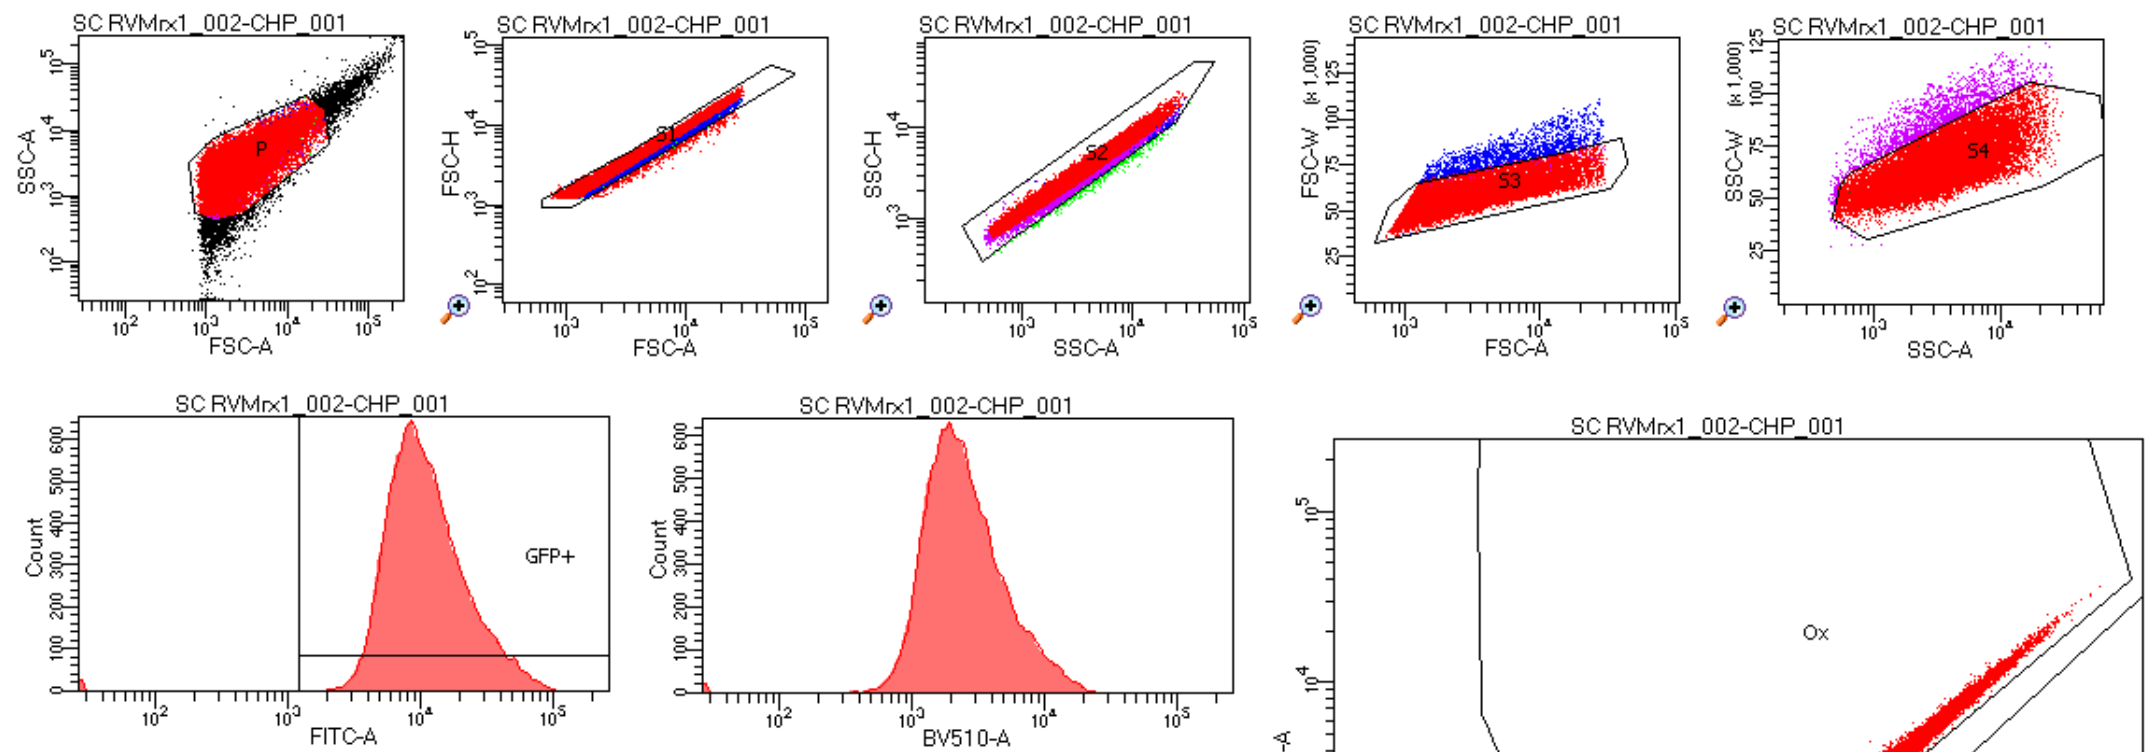

Tube: CHP\_001

| Population | #Events | %Parent | %Total |
|------------|---------|---------|--------|
| All Events | 33,616  | ####    | 100.0  |
| P          | 30,933  | 92.0    | 92.0   |
| S1         | 30,384  | 98.2    | 90.4   |
| S2         | 29,945  | 98.6    | 89.1   |
| S3         | 28,535  | 95.3    | 84.9   |
| S4         | 26,819  | 94.0    | 79.8   |
| GFP+       | 26,655  | 99.4    | 79.3   |
| Ox         | 26,128  | 98.0    | 77.7   |
| Red        | 0       | 0.0     | 0.0    |

Experiment Name: 31Jan2017 Bac sorting  
 Specimen Name: SC RVMrx1\_002  
 Tube Name: CHP\_001  
 Record Date: Jan 31, 2017 3:02:06 PM  
 SOP: Administrator  
 GUID: 79244162-01c7-4099-b6f3-b9ab3ae...

| Population | #Events | %Parent | FITC-A<br>Median | BV510-A<br>Median |
|------------|---------|---------|------------------|-------------------|
| S4         | 26,819  | 94.0    | 9,856            | 2,209             |
| GFP+       | 26,655  | 99.4    | 9,911            | 2,220             |
| Ox         | 26,128  | 98.0    | 10,016           | 2,250             |
| Red        | 0       | 0.0     | ####             | ####              |

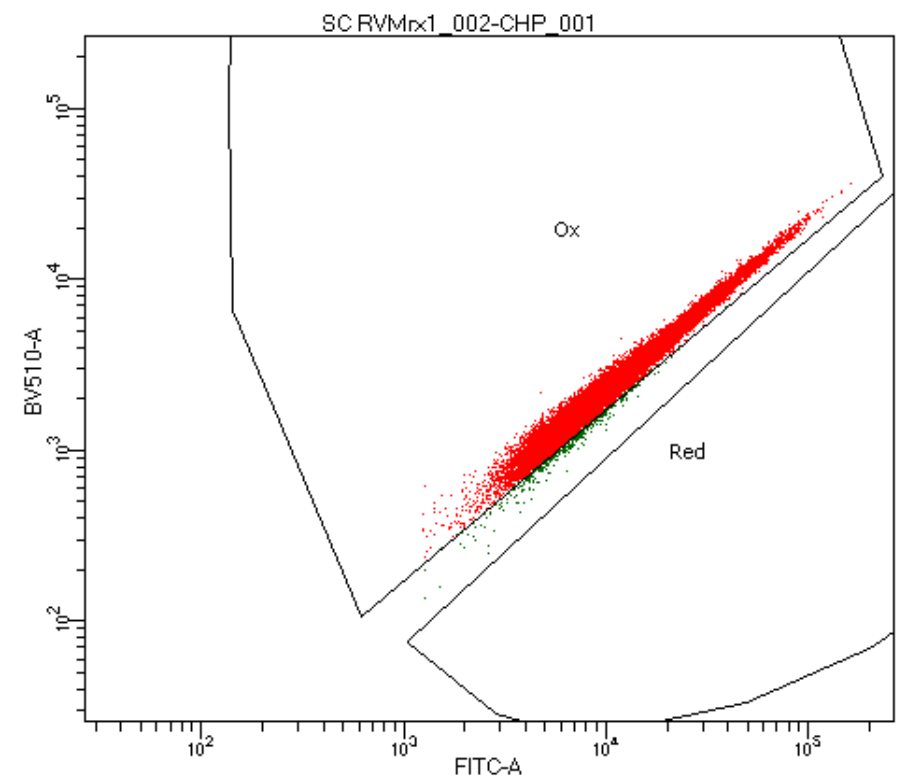

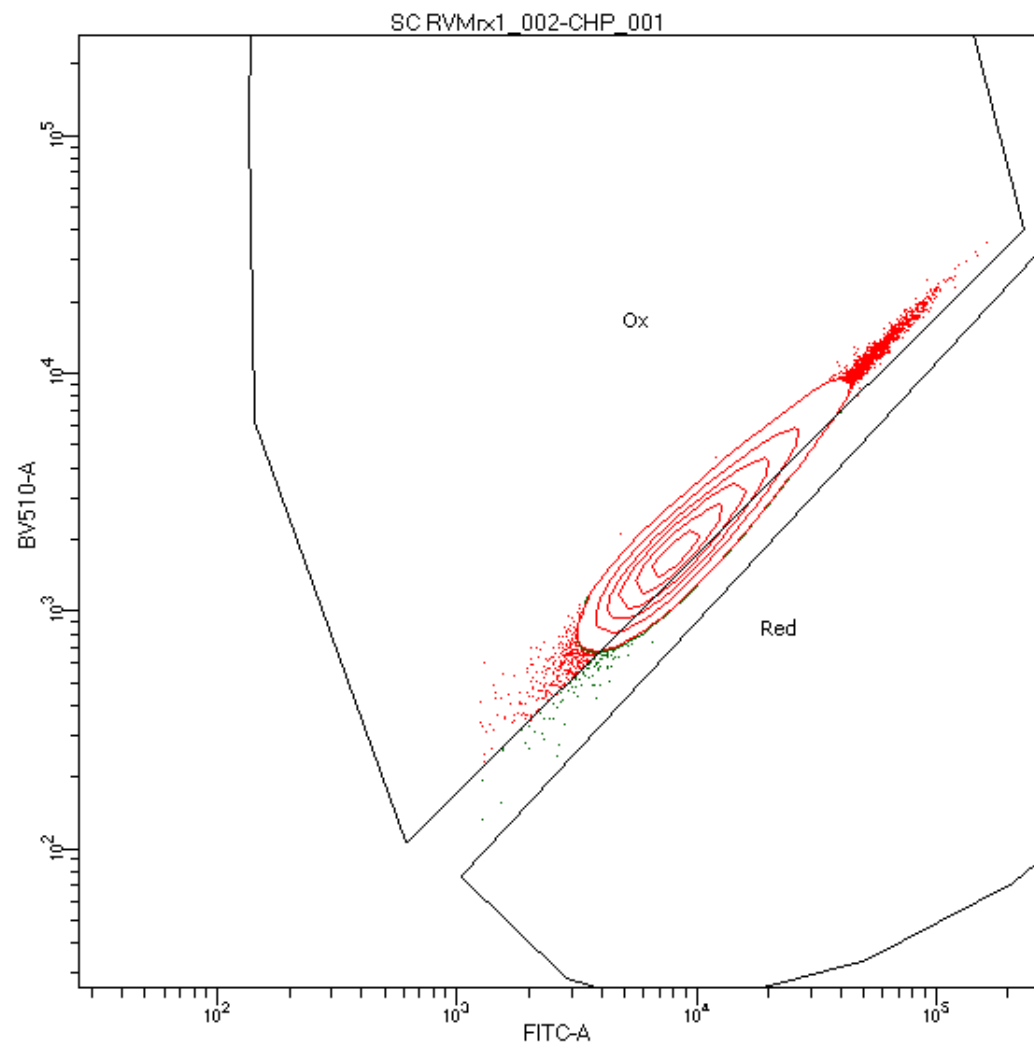

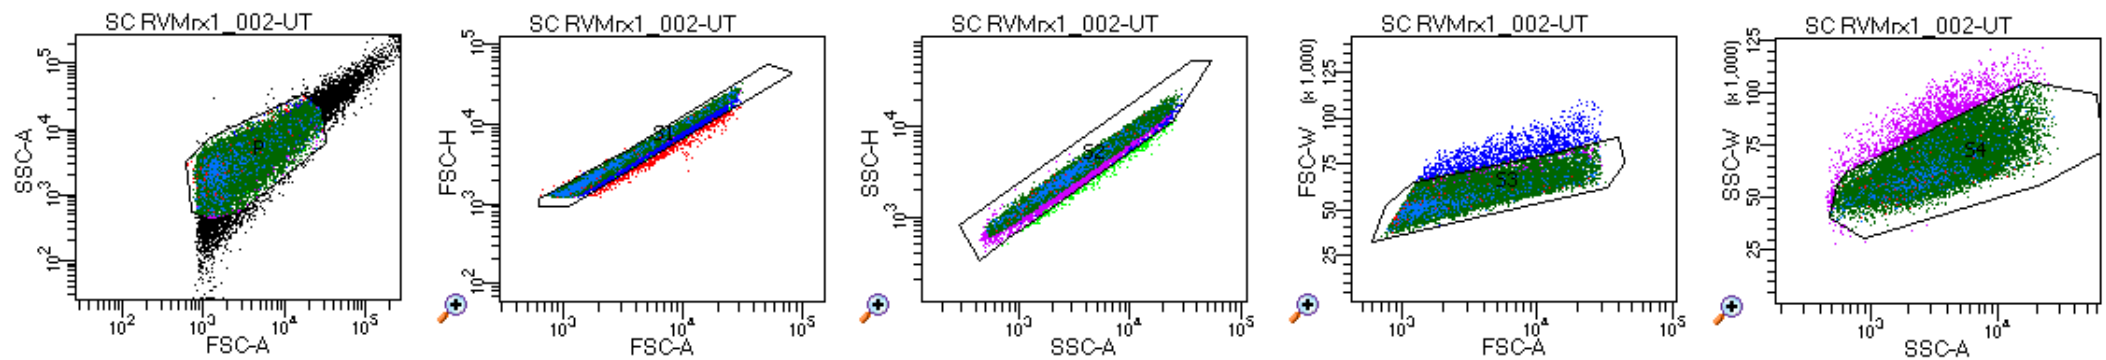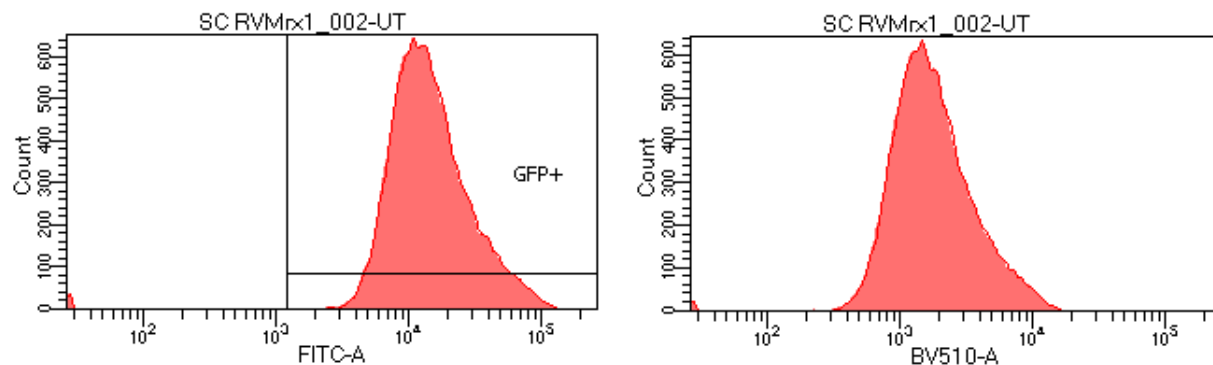

Tube: UT

| Population | #Events | %Parent | %Total |
|------------|---------|---------|--------|
| All Events | 33,599  | ####    | 100.0  |
| P          | 30,896  | 92.0    | 92.0   |
| S1         | 30,349  | 98.2    | 90.3   |
| S2         | 29,979  | 98.8    | 89.2   |
| S3         | 28,705  | 95.8    | 85.4   |
| S4         | 27,167  | 94.6    | 80.9   |
| GFP+       | 27,003  | 99.4    | 80.4   |
| Ox         | 64      | 0.2     | 0.2    |
| Red        | 507     | 1.9     | 1.5    |

|                  |                                    |  |  |  |
|------------------|------------------------------------|--|--|--|
| Experiment Name: | 31Jan2017 Bac sorting              |  |  |  |
| Specimen Name:   | SC RVMrx1_002                      |  |  |  |
| Tube Name:       | UT                                 |  |  |  |
| Record Date:     | Jan 31, 2017 3:02:38 PM            |  |  |  |
| \$OP:            | Administrator                      |  |  |  |
| GUID:            | 52b09284-8da2-4f00-96a6-278a802... |  |  |  |

  

| Population                                                                             | #Events | %Parent | FITC-A<br>Median | BV510-A<br>Median |
|----------------------------------------------------------------------------------------|---------|---------|------------------|-------------------|
|  S4   | 27,167  | 94.6    | 13,001           | 1,577             |
|  GFP+ | 27,003  | 99.4    | 13,057           | 1,586             |
|  Ox   | 64      | 0.2     | 5,911            | 1,129             |
|  Red  | 507     | 1.9     | 11,009           | 998               |

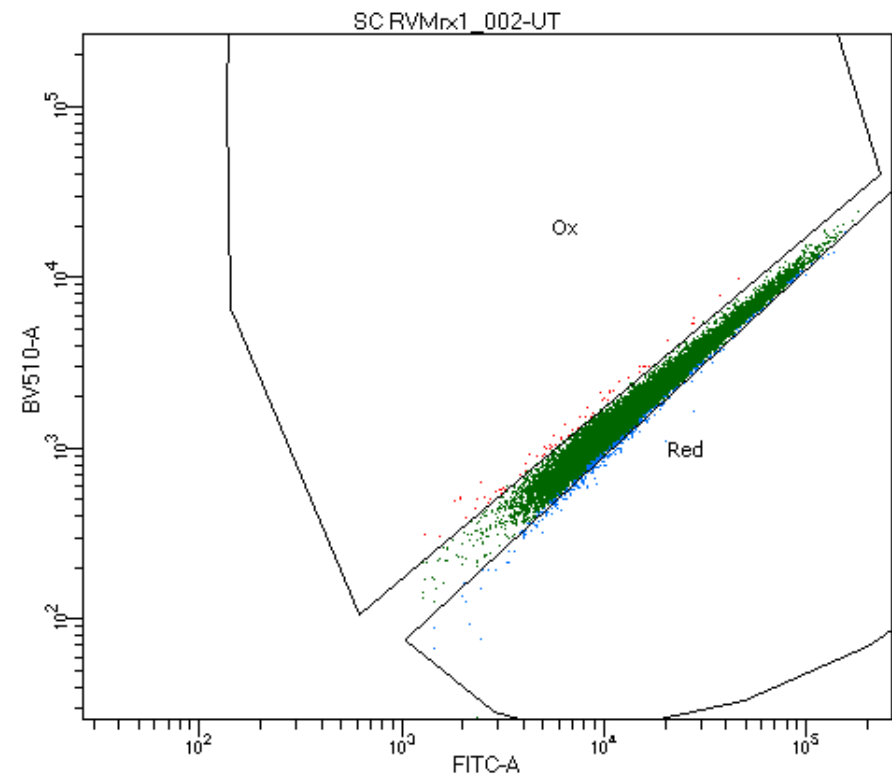

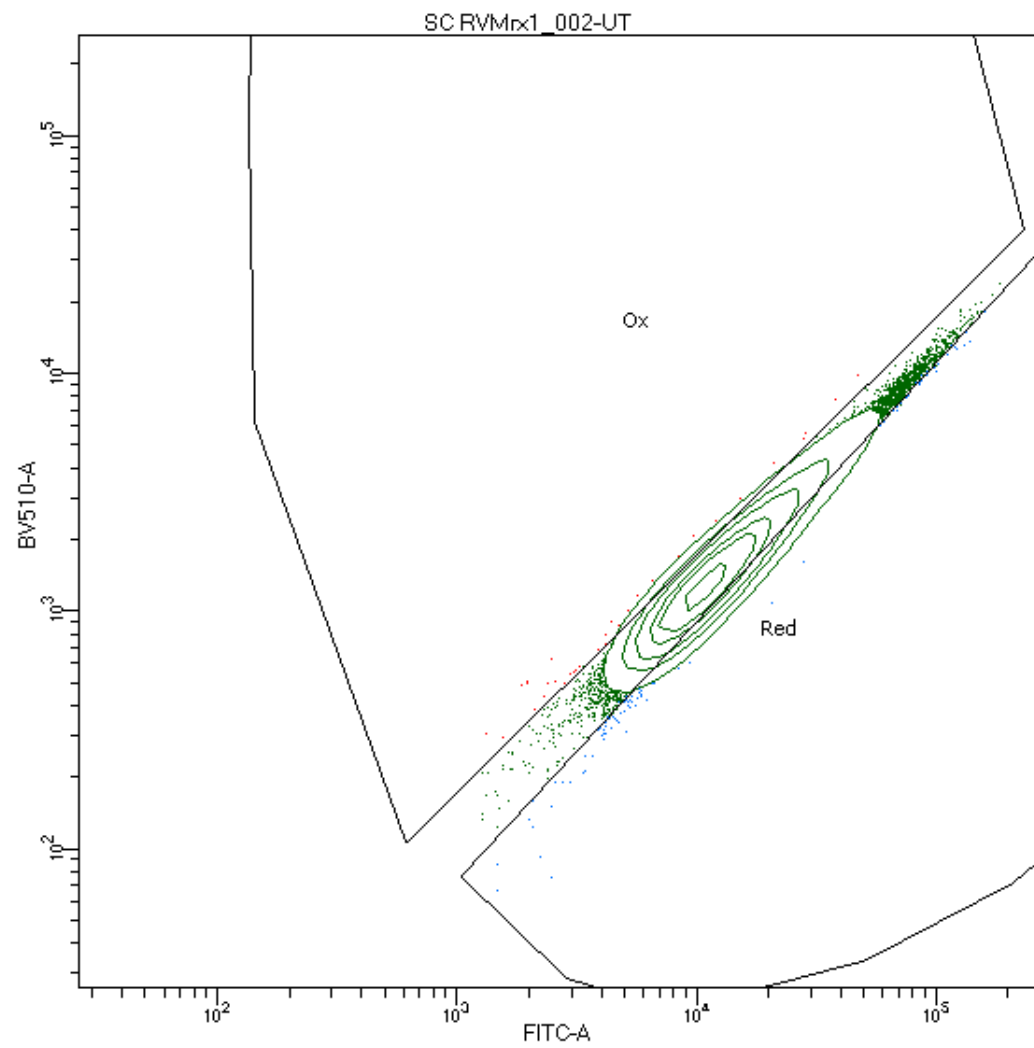

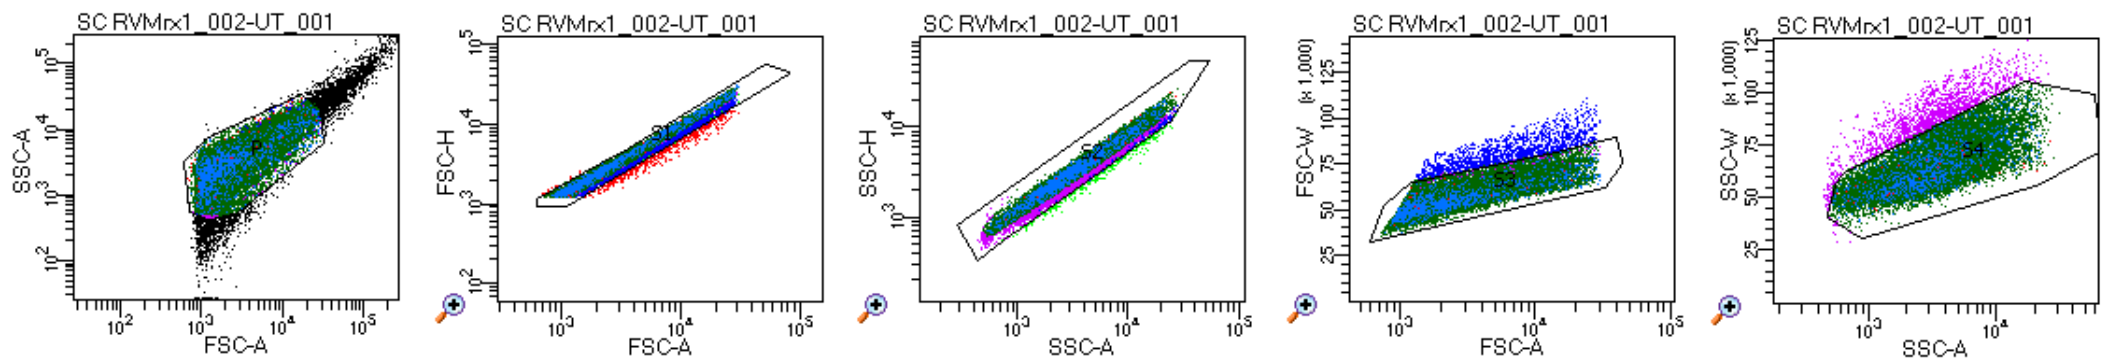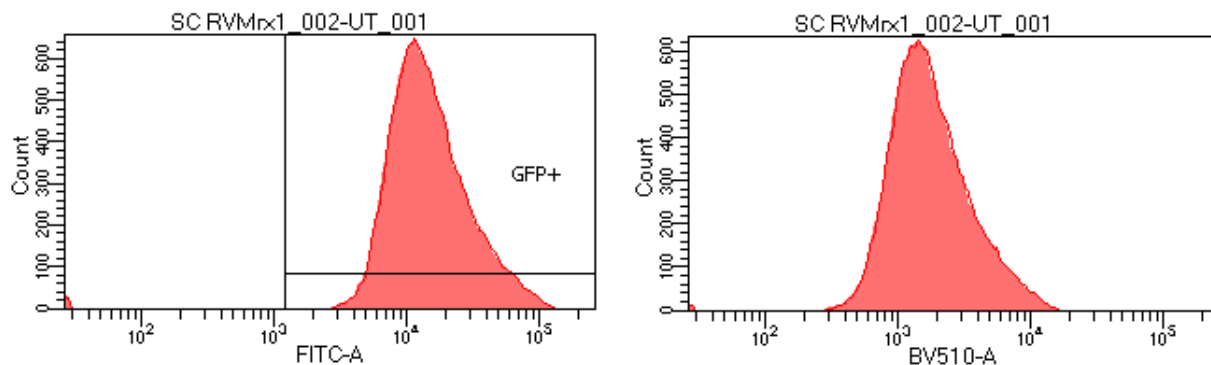

Tube: UT\_001

| Population | #Events | %Parent | %Total |
|------------|---------|---------|--------|
| All Events | 33,646  | ####    | 100.0  |
| P          | 30,881  | 91.8    | 91.8   |
| S1         | 30,270  | 98.0    | 90.0   |
| S2         | 29,912  | 98.8    | 88.9   |
| S3         | 28,587  | 95.6    | 85.0   |
| S4         | 26,993  | 94.4    | 80.2   |
| GFP+       | 26,841  | 99.4    | 79.8   |
| Ox         | 42      | 0.2     | 0.1    |
| Red        | 1,008   | 3.8     | 3.0    |

|                  |                                    |
|------------------|------------------------------------|
| Experiment Name: | 31Jan2017 Bac sorting              |
| Specimen Name:   | SC RVMrx1_002                      |
| Tube Name:       | UT_001                             |
| Record Date:     | Jan 31, 2017 3:03:10 PM            |
| \$OP:            | Administrator                      |
| GUID:            | e84988a1-341b-4af2-8572-1028f82... |

| Population                                                                             | #Events | %Parent | FITC-A<br>Median | BV510-A<br>Median |
|----------------------------------------------------------------------------------------|---------|---------|------------------|-------------------|
|  S4   | 26,993  | 94.4    | 13,161           | 1,558             |
|  GFP+ | 26,841  | 99.4    | 13,225           | 1,566             |
|  Ox   | 42      | 0.2     | 6,447            | 1,181             |
|  Red  | 1,008   | 3.8     | 12,816           | 1,167             |

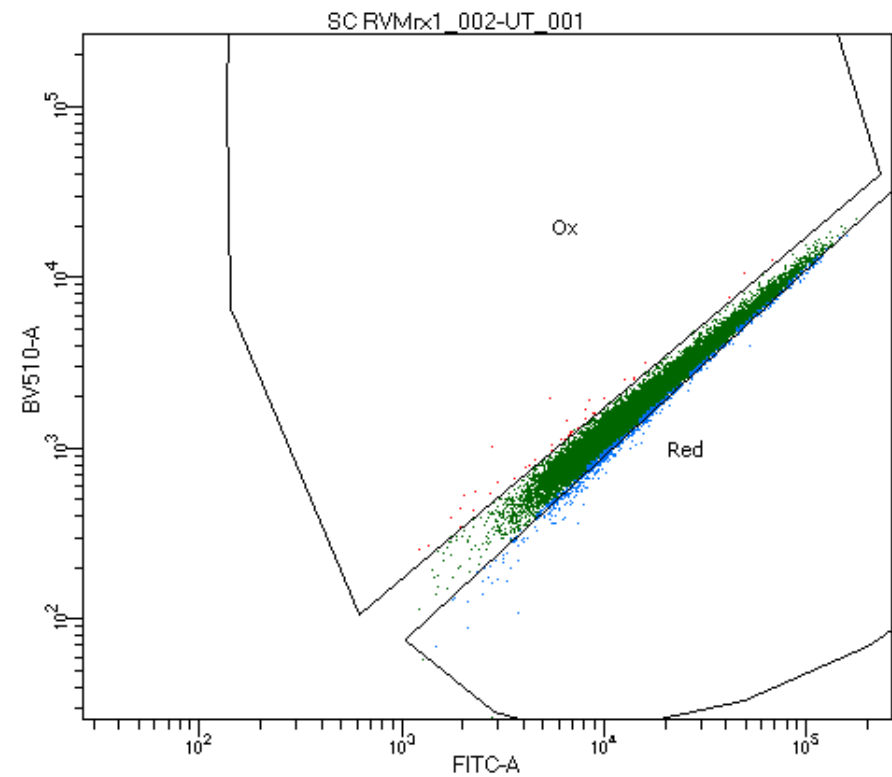

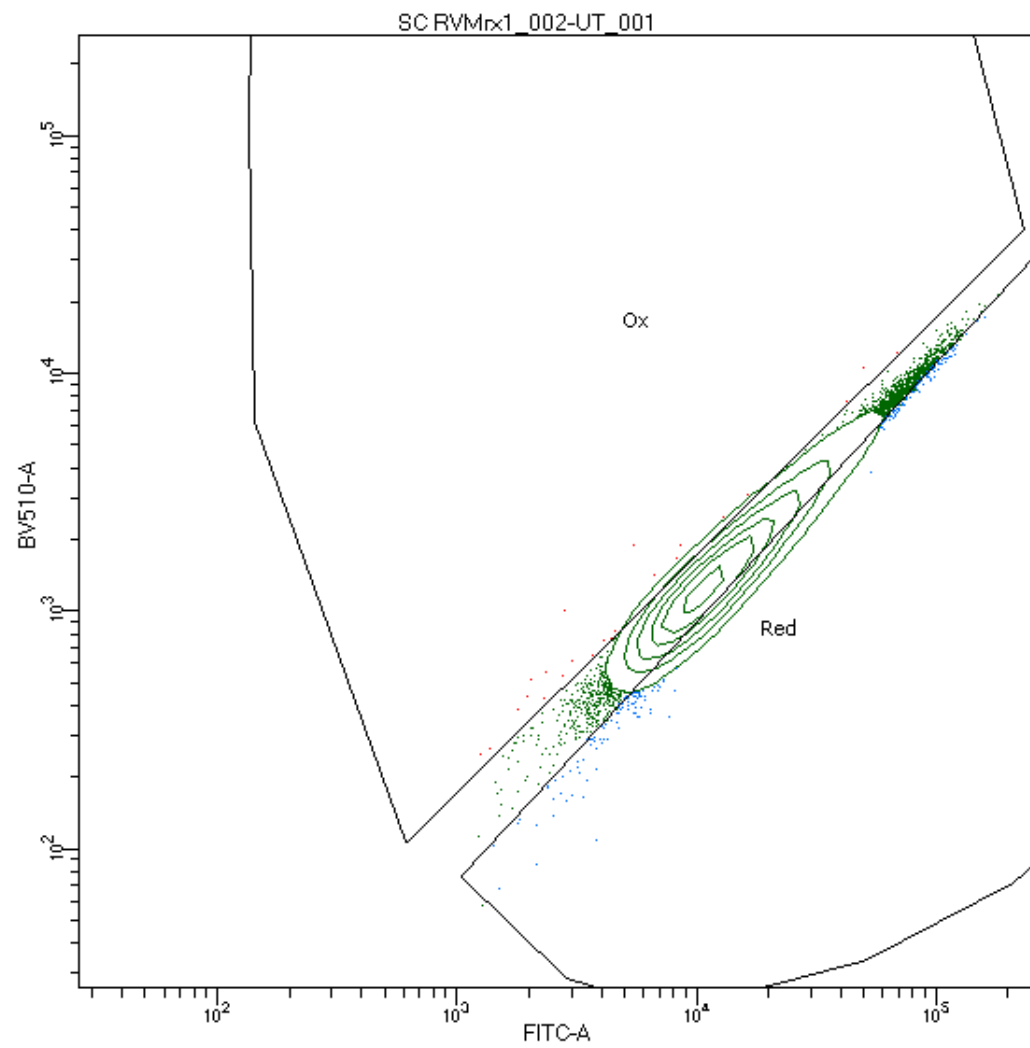

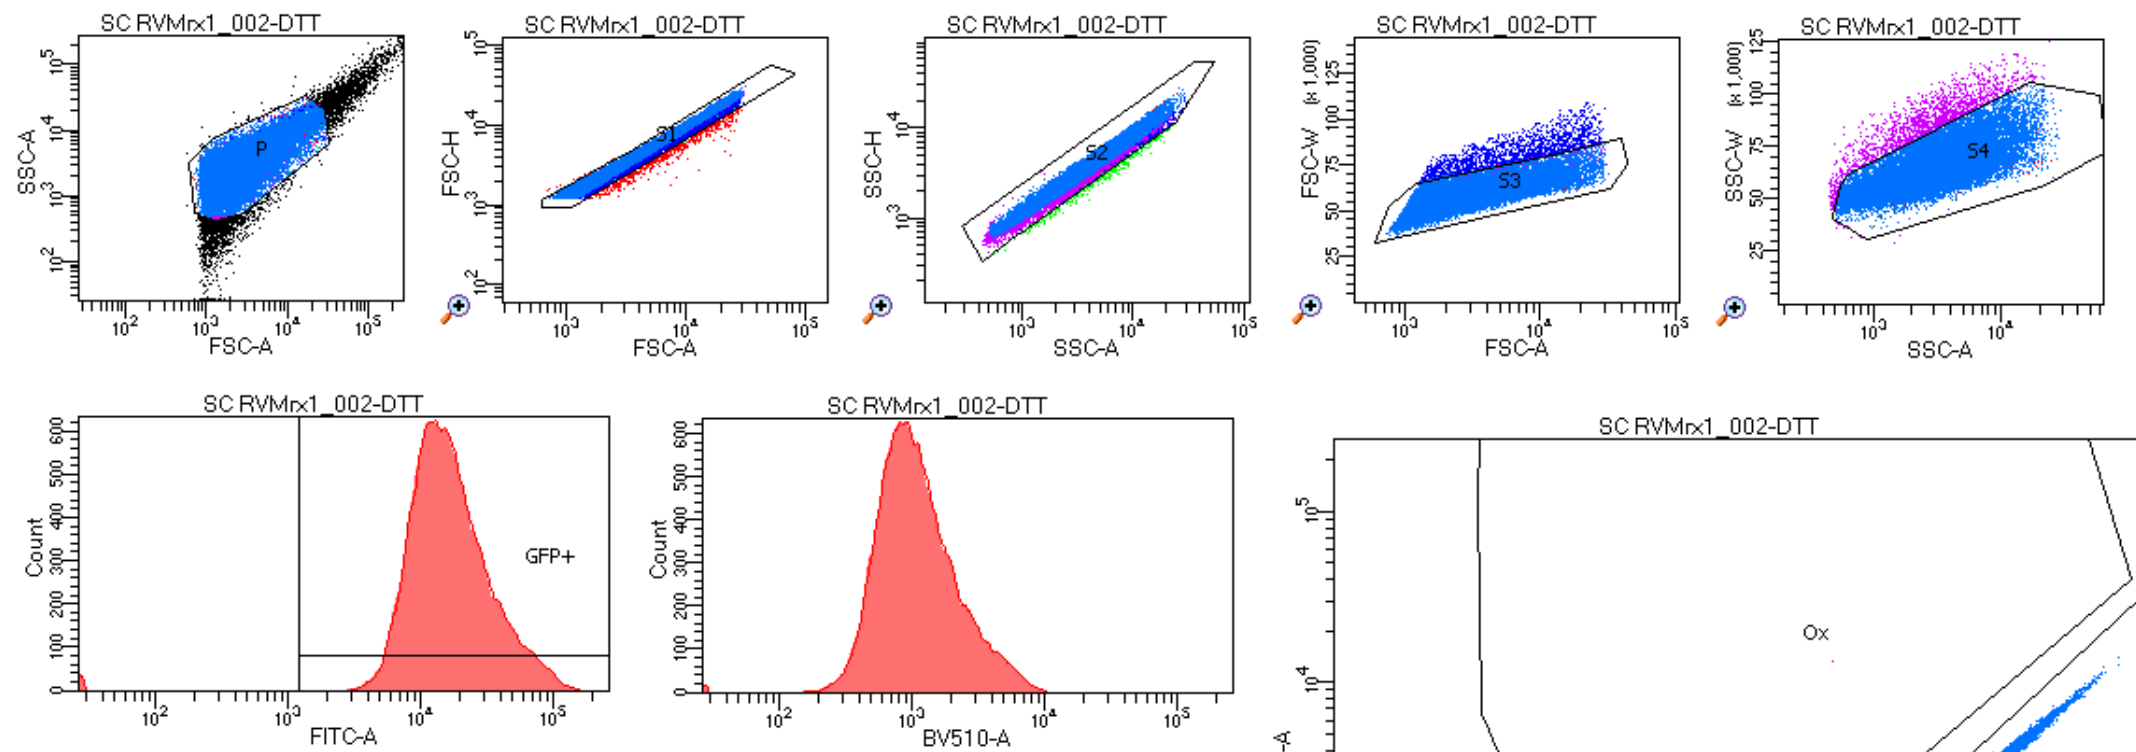

Tube: DTT

| Population | #Events | %Parent | %Total |
|------------|---------|---------|--------|
| All Events | 33,815  | ####    | 100.0  |
| P          | 30,972  | 91.6    | 91.6   |
| S1         | 30,357  | 98.0    | 89.8   |
| S2         | 29,960  | 98.7    | 88.6   |
| S3         | 28,506  | 95.1    | 84.3   |
| S4         | 26,951  | 94.5    | 79.7   |
| GFP+       | 26,785  | 99.4    | 79.2   |
| Ox         | 9       | 0.0     | 0.0    |
| Red        | 26,626  | 99.4    | 78.7   |

|                  |                                    |
|------------------|------------------------------------|
| Experiment Name: | 31Jan2017 Bac sorting              |
| Specimen Name:   | SC RVMrx1_002                      |
| Tube Name:       | DTT                                |
| Record Date:     | Jan 31, 2017 3:00:24 PM            |
| SOP:             | Administrator                      |
| GUID:            | 92d65dd3-fd3a-4941-892a-59831eb... |

  

| Population | #Events | %Parent | FITC-A<br>Median | BV510-A<br>Median |
|------------|---------|---------|------------------|-------------------|
| S4         | 26,951  | 94.5    | 14,964           | 969               |
| GFP+       | 26,785  | 99.4    | 15,047           | 974               |
| Ox         | 9       | 0.0     | 1,887            | 375               |
| Red        | 26,626  | 99.4    | 15,118           | 979               |

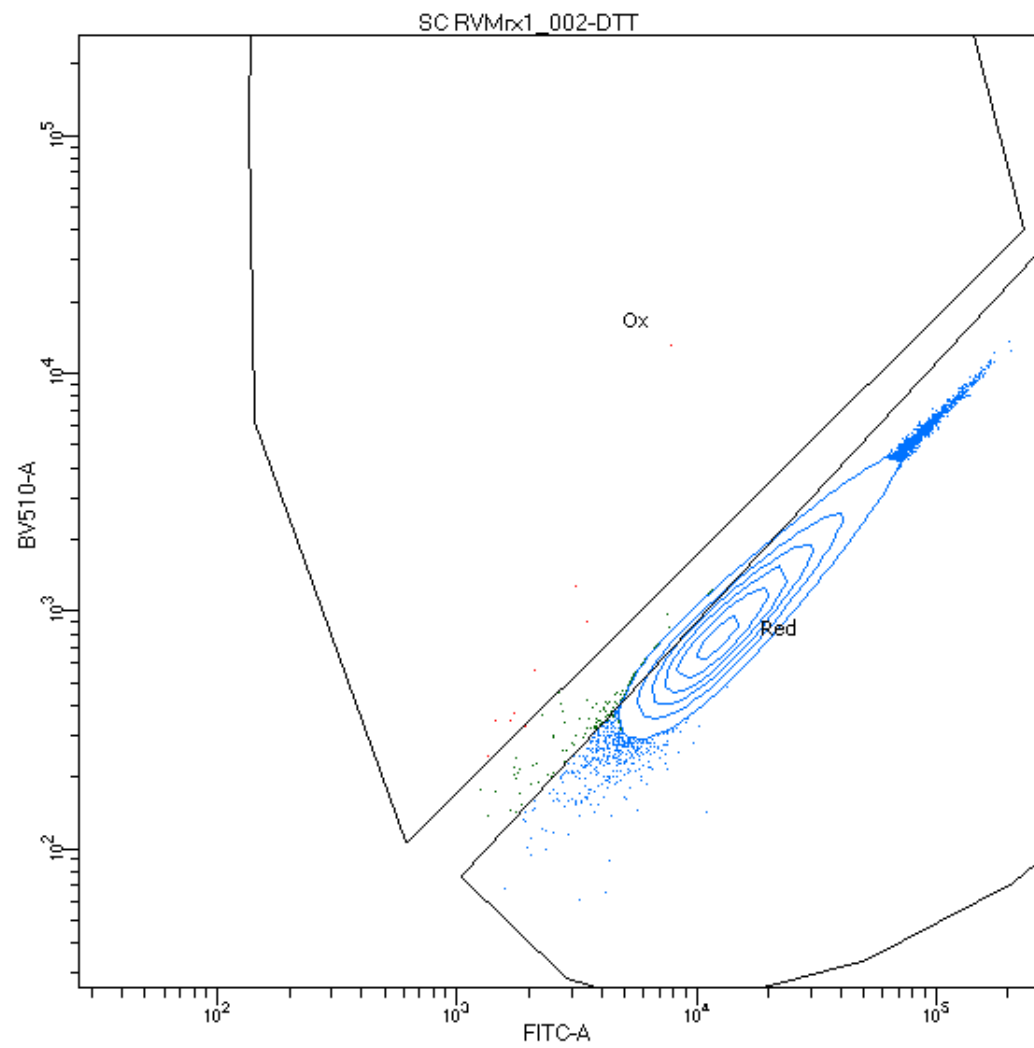



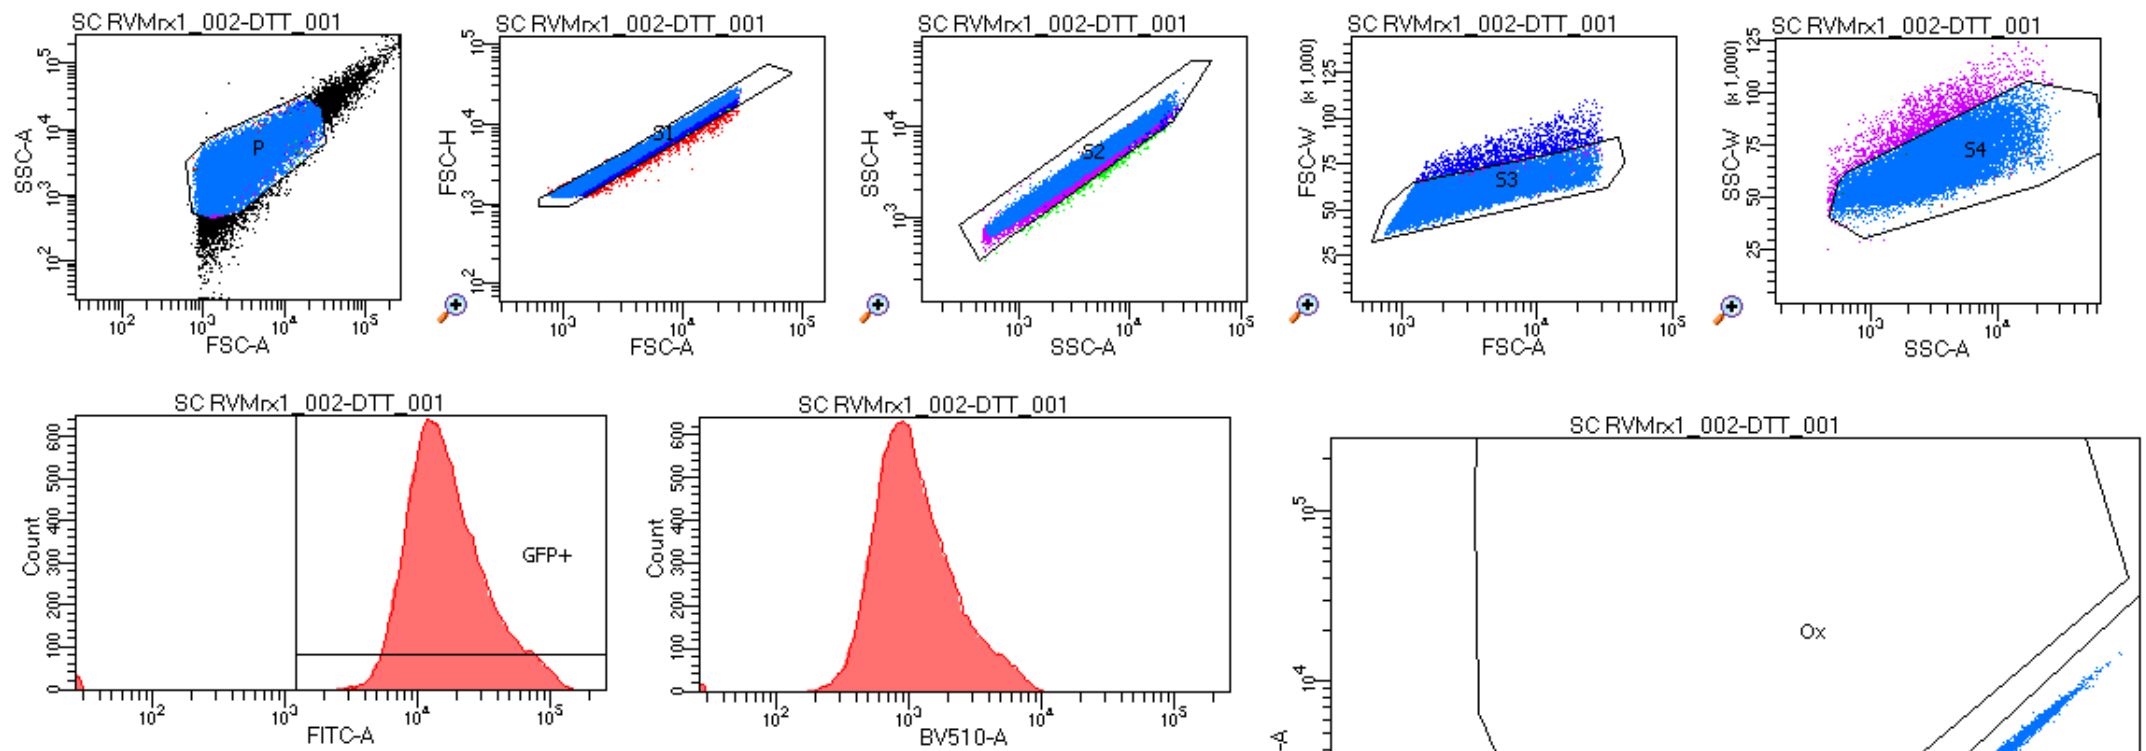

Tube: DTT\_001

| Population | #Events | %Parent | %Total |
|------------|---------|---------|--------|
| All Events | 33,833  | ####    | 100.0  |
| P          | 31,038  | 91.7    | 91.7   |
| S1         | 30,416  | 98.0    | 89.9   |
| S2         | 30,039  | 98.8    | 88.8   |
| S3         | 28,633  | 95.3    | 84.6   |
| S4         | 27,027  | 94.4    | 79.9   |
| GFP+       | 26,885  | 99.5    | 79.5   |
| Ox         | 5       | 0.0     | 0.0    |
| Red        | 26,696  | 99.3    | 78.9   |

|                  |                                   |  |  |  |
|------------------|-----------------------------------|--|--|--|
| Experiment Name: | 31Jan2017 Bac sorting             |  |  |  |
| Specimen Name:   | SC RVMrx1_002                     |  |  |  |
| Tube Name:       | DTT_001                           |  |  |  |
| Record Date:     | Jan 31, 2017 3:00:56 PM           |  |  |  |
| \$OP:            | Administrator                     |  |  |  |
| GUID:            | 90cd5d7b-22a2-4787-8681-a94b9c... |  |  |  |

  

| Population                                                                             | #Events | %Parent | FITC-A<br>Median | BV510-A<br>Median |
|----------------------------------------------------------------------------------------|---------|---------|------------------|-------------------|
|  S4   | 27,027  | 94.4    | 14,749           | 972               |
|  GFP+ | 26,885  | 99.5    | 14,819           | 976               |
|  Ox   | 5       | 0.0     | 1,896            | 611               |
|  Red  | 26,696  | 99.3    | 14,900           | 981               |

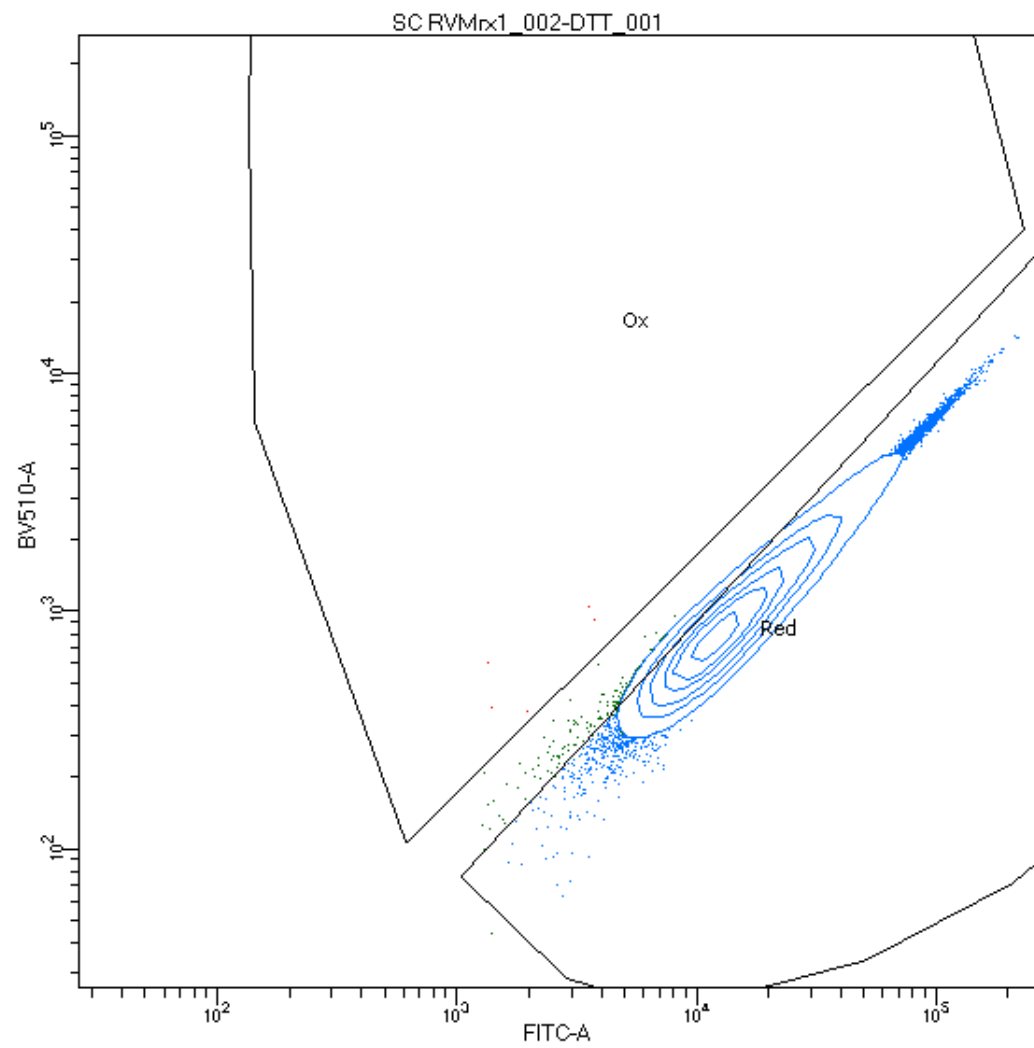

Supplement: supp [file elife-80218-supp-v1.zip]
