# Supplementary material for: Biosensor-integrated transposon mutagenesis reveals rv0158 as a coordinator of redox homeostasis in Mycobacterium tuberculosis
Source: eLife journal article supplement (doi:10.7554/elife.80218), 2023-08-29

# Batch Analysis Report

Run Date: 12/12/16 3:11 PM

Experiment: 05EDec2016 Bac sorting

User ID: Administrator

Statistics Output: N/A

Worksheet PDF Output: C:\Users\Admin\Desktop\05EDec2016 Bac sorting-Batch\_Analysis\_1212  
2016151104.pdf

## 12Dec

| Tube            | Status | Run Time         |
|-----------------|--------|------------------|
| US              | OK     | 12/12/16 3:11 PM |
| RV Mrx1         | OK     | 12/12/16 3:11 PM |
| RV Mrx1_Richa   | OK     | 12/12/16 3:11 PM |
| CHP             | OK     | 12/12/16 3:11 PM |
| CHP_001         | OK     | 12/12/16 3:11 PM |
| DTT             | OK     | 12/12/16 3:11 PM |
| DTT_001         | OK     | 12/12/16 3:11 PM |
| Tn Lib_only hyg | OK     | 12/12/16 3:11 PM |
| TN lib          | OK     | 12/12/16 3:11 PM |
| Ox Post Sort    | OK     | 12/12/16 3:11 PM |
| Red Post Sort   | OK     | 12/12/16 3:11 PM |

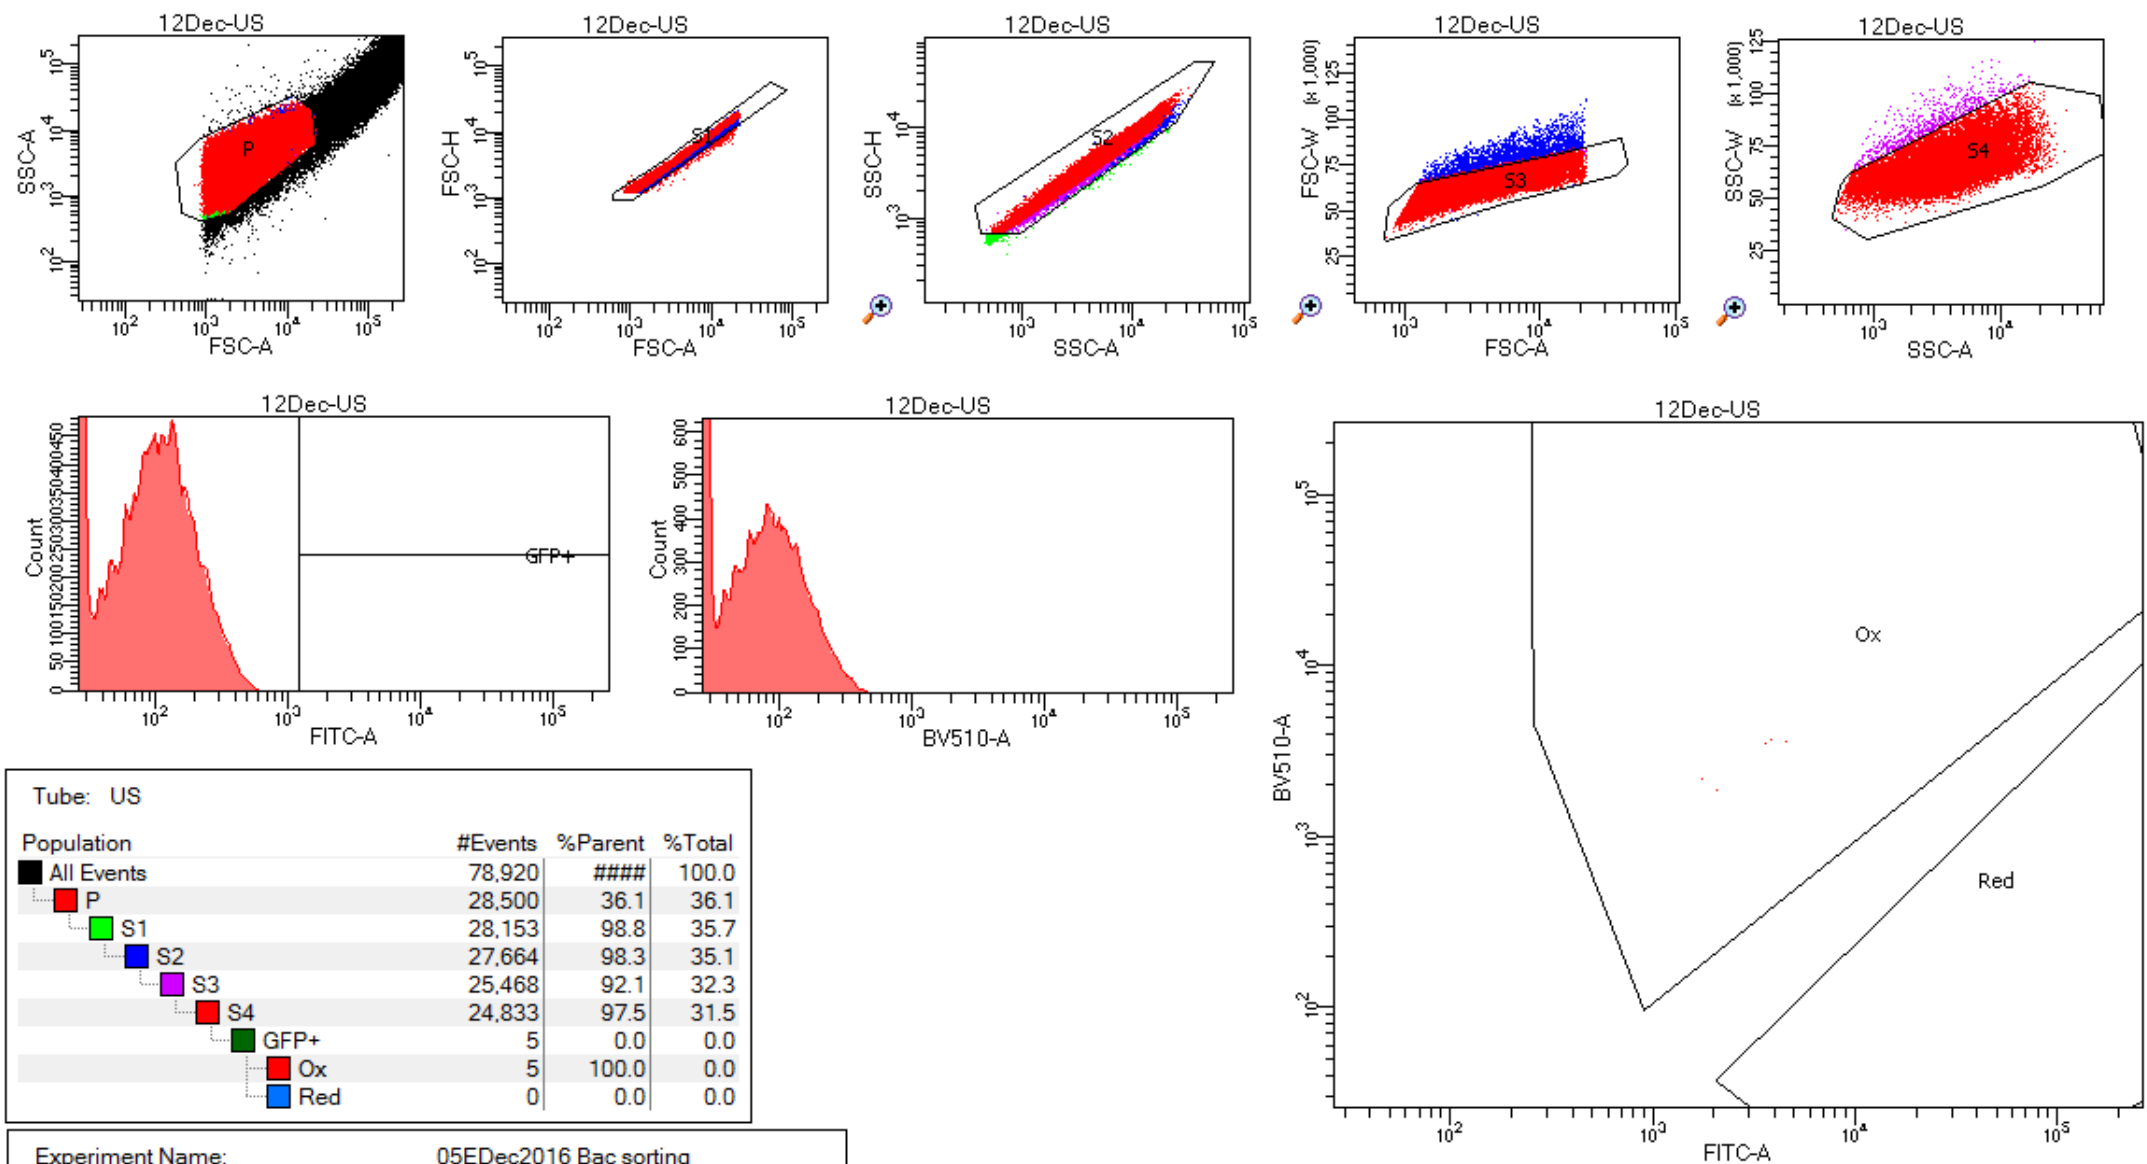

Tube: US

| Population | #Events | %Parent | %Total |
|------------|---------|---------|--------|
| All Events | 78,920  | ####    | 100.0  |
| P          | 28,500  | 36.1    | 36.1   |
| S1         | 28,153  | 98.8    | 35.7   |
| S2         | 27,664  | 98.3    | 35.1   |
| S3         | 25,468  | 92.1    | 32.3   |
| S4         | 24,833  | 97.5    | 31.5   |
| GFP+       | 5       | 0.0     | 0.0    |
| Ox         | 5       | 100.0   | 0.0    |
| Red        | 0       | 0.0     | 0.0    |

|                  |                                    |
|------------------|------------------------------------|
| Experiment Name: | 05EDec2016 Bac sorting             |
| Specimen Name:   | 12Dec                              |
| Tube Name:       | US                                 |
| Record Date:     | Dec 12, 2016 11:11:42 AM           |
| SOP:             | Administrator                      |
| GUID:            | b88a611d-6fad-4730-a016-ba816c6... |

  

| Population | #Events | %Parent | FITC-A<br>Median | BV510-A<br>Median |
|------------|---------|---------|------------------|-------------------|
| S4         | 24,833  | 97.5    | 86               | 61                |
| GFP+       | 5       | 0.0     | 3,609            | 3,476             |
| Ox         | 5       | 100.0   | 3,609            | 3,476             |
| Red        | 0       | 0.0     | ####             | ####              |

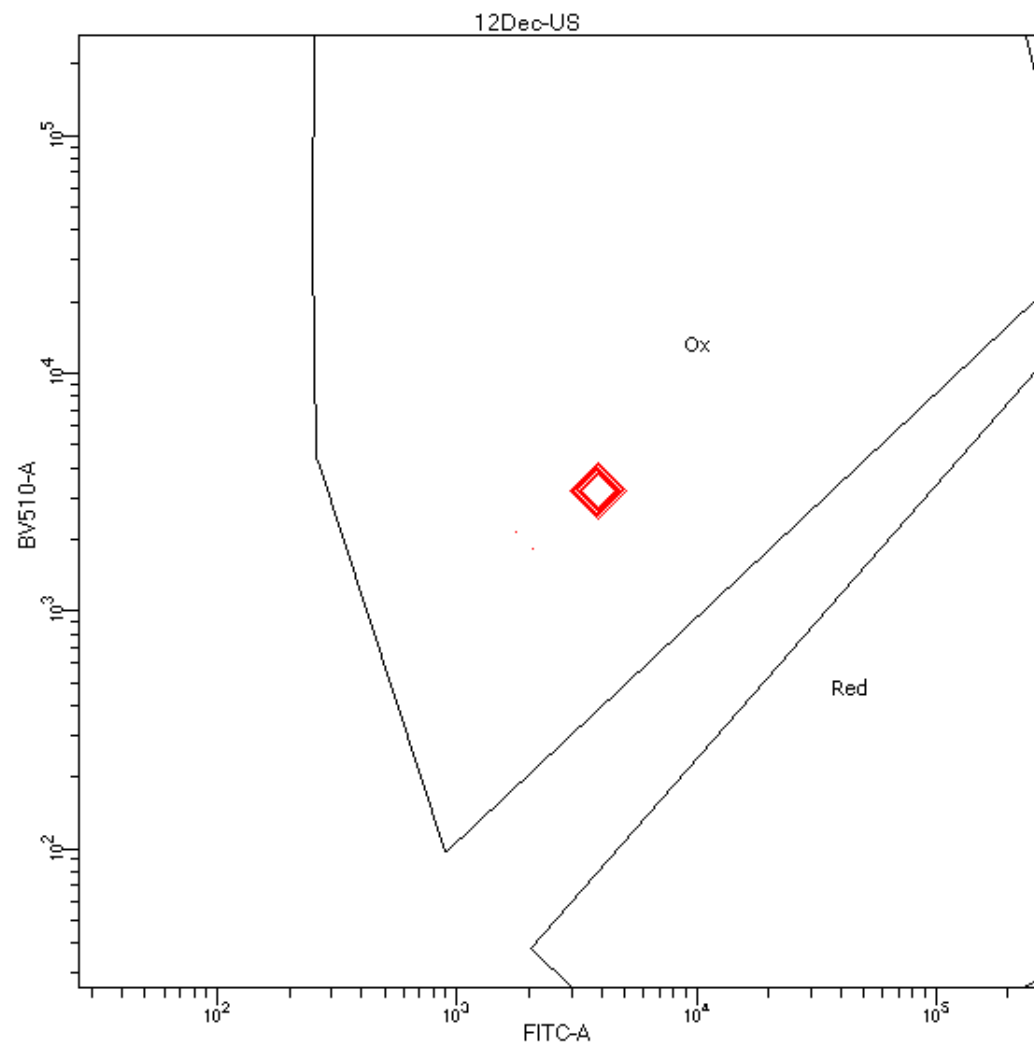

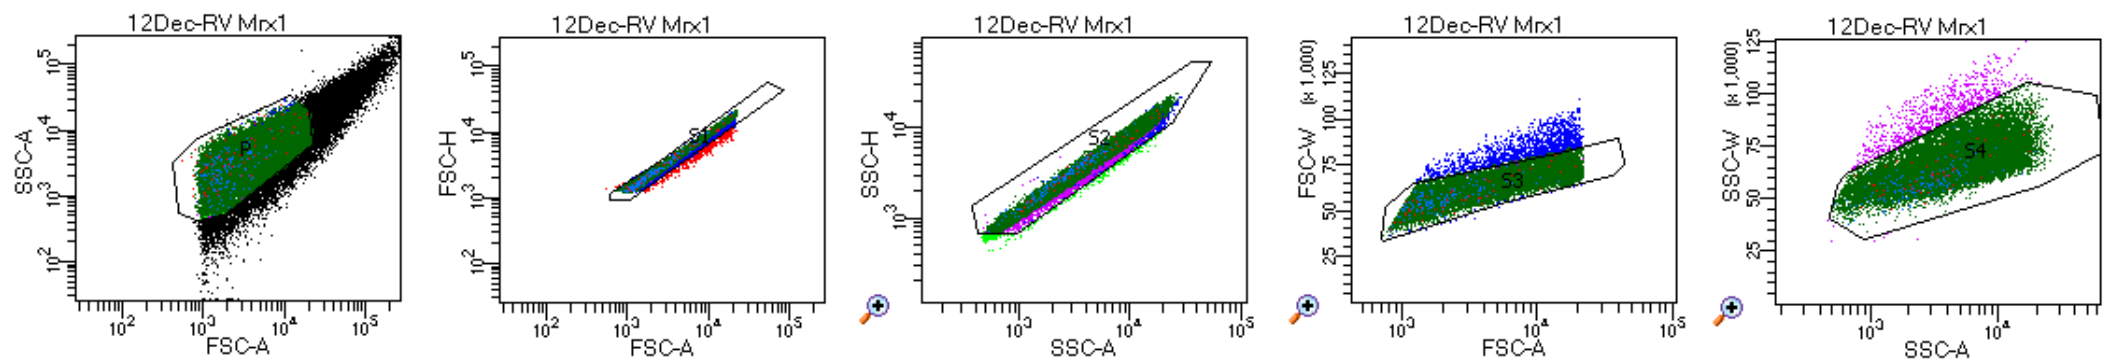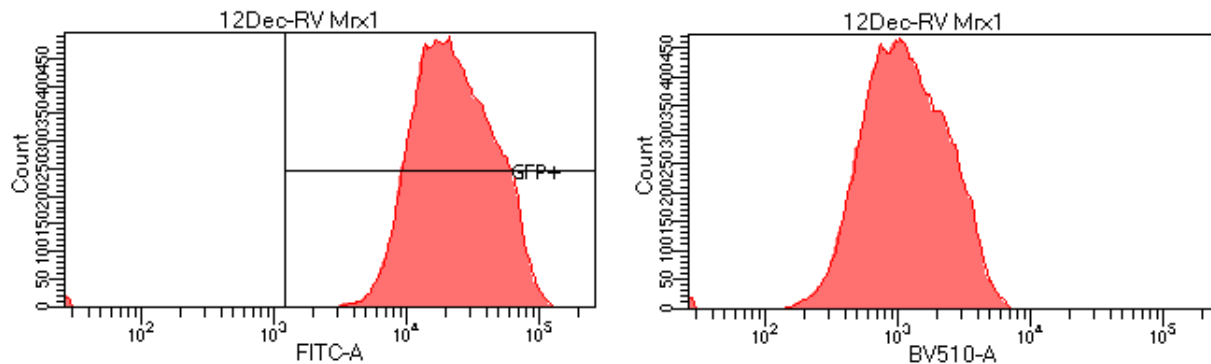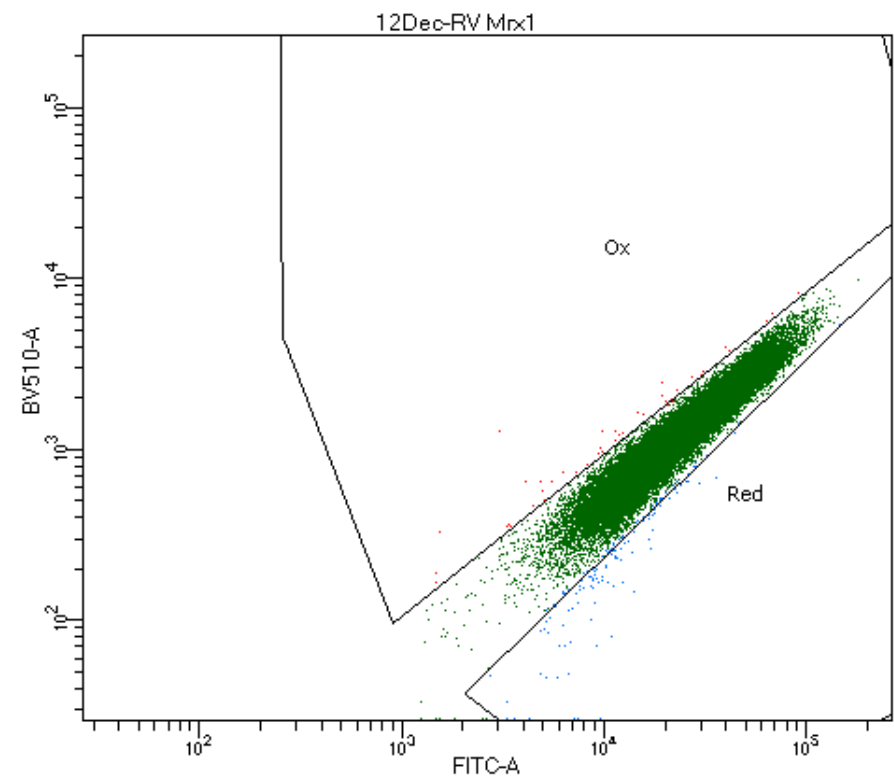

Tube: RV Mx1

| Population | #Events | %Parent | %Total |
|------------|---------|---------|--------|
| All Events | 39,084  | ####    | 100.0  |
| P          | 28,099  | 71.9    | 71.9   |
| S1         | 27,597  | 98.2    | 70.6   |
| S2         | 27,171  | 98.5    | 69.5   |
| S3         | 25,557  | 94.1    | 65.4   |
| S4         | 24,758  | 96.9    | 63.3   |
| GFP+       | 24,678  | 99.7    | 63.1   |
| Ox         | 49      | 0.2     | 0.1    |
| Red        | 141     | 0.6     | 0.4    |

|                  |                                     |  |  |  |
|------------------|-------------------------------------|--|--|--|
| Experiment Name: | 05EDec2016 Bac sorting              |  |  |  |
| Specimen Name:   | 12Dec                               |  |  |  |
| Tube Name:       | RV Mrx1                             |  |  |  |
| Record Date:     | Dec 12, 2016 11:12:21 AM            |  |  |  |
| \$OP:            | Administrator                       |  |  |  |
| GUID:            | 75acde8a-fcc9-4979-a59f-692f543b... |  |  |  |

  

| Population                                                                             | #Events | %Parent | FITC-A<br>Median | BV510-A<br>Median |
|----------------------------------------------------------------------------------------|---------|---------|------------------|-------------------|
|  S4   | 24,758  | 96.9    | 21,184           | 1,065             |
|  GFP+ | 24,678  | 99.7    | 21,248           | 1,067             |
|  Ox   | 49      | 0.2     | 11,408           | 1,274             |
|  Red  | 141     | 0.6     | 10,954           | 233               |

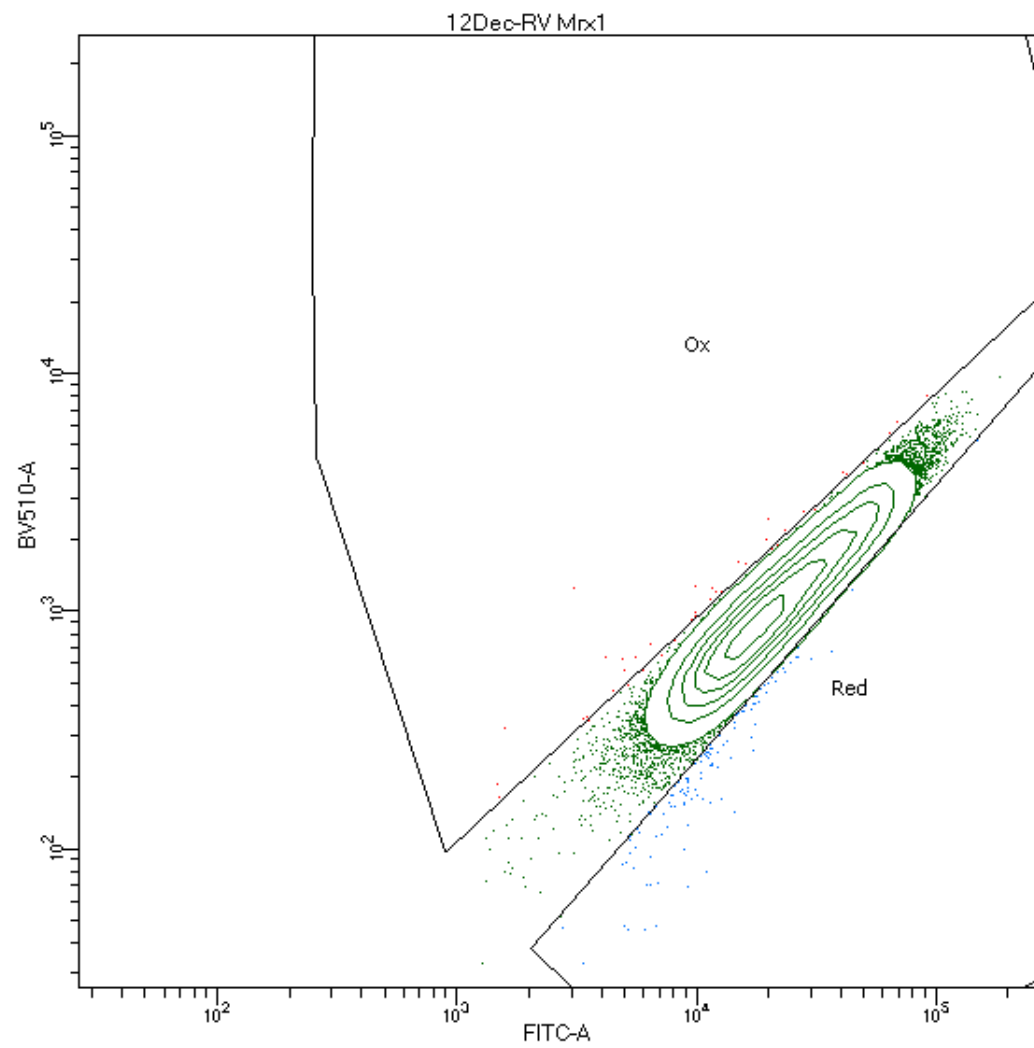

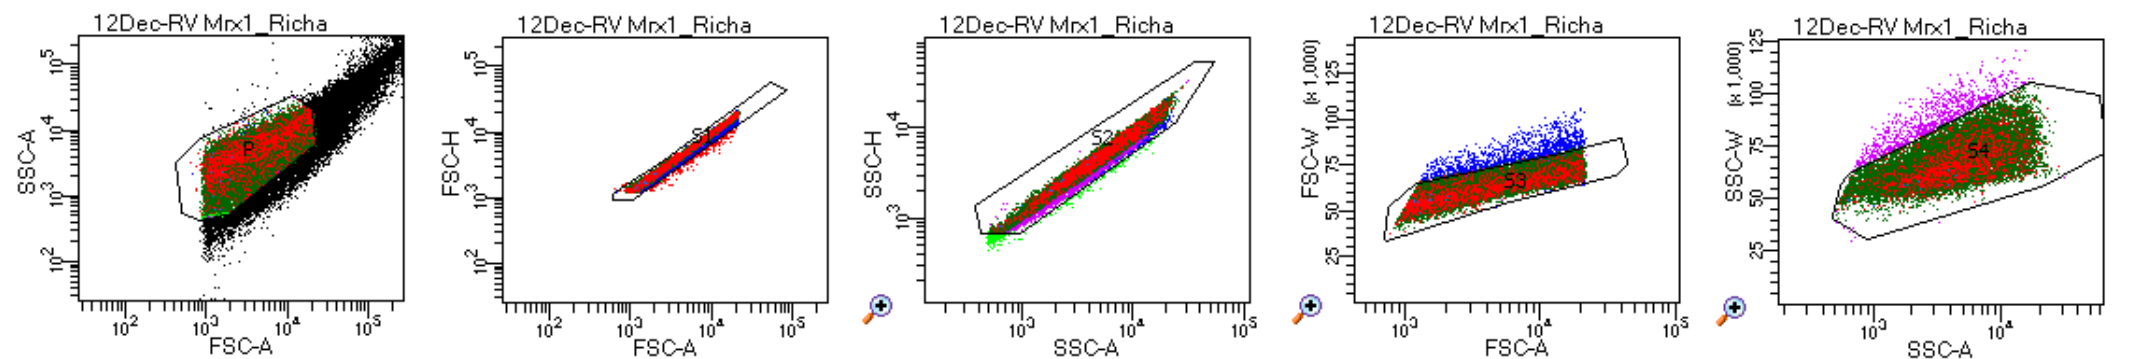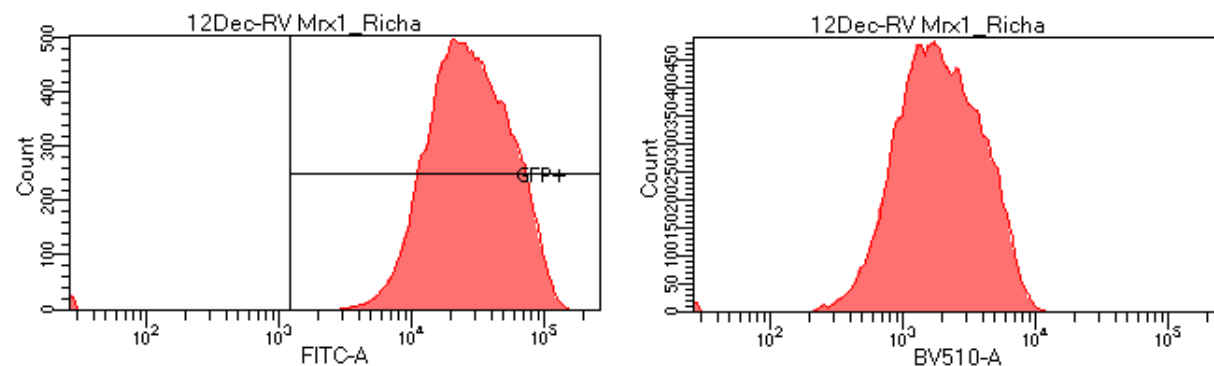

Tube: RV Mrx1\_Richa

| Population | #Events | %Parent | %Total |
|------------|---------|---------|--------|
| All Events | 41,273  | ####    | 100.0  |
| P          | 28,541  | 69.2    | 69.2   |
| S1         | 28,290  | 99.1    | 68.5   |
| S2         | 27,830  | 98.4    | 67.4   |
| S3         | 26,673  | 95.8    | 64.6   |
| S4         | 25,783  | 96.7    | 62.5   |
| GFP+       | 25,684  | 99.6    | 62.2   |
| Ox         | 1,570   | 6.1     | 3.8    |
| Red        | 10      | 0.0     | 0.0    |

|                  |                                    |
|------------------|------------------------------------|
| Experiment Name: | 05EDec2016 Bac sorting             |
| Specimen Name:   | 12Dec                              |
| Tube Name:       | RV Mrx1_Richa                      |
| Record Date:     | Dec 12, 2016 11:13:00 AM           |
| SOP:             | Administrator                      |
| GUID:            | ab3c38ff-0e55-4429-bd37-2290bae... |

  

| Population | #Events | %Parent | FITC-A<br>Median | BV510-A<br>Median |
|------------|---------|---------|------------------|-------------------|
| S4         | 25,783  | 96.7    | 26,042           | 1,778             |
| GFP+       | 25,684  | 99.6    | 26,125           | 1,784             |
| Ox         | 1,570   | 6.1     | 21,920           | 2,229             |
| Red        | 10      | 0.0     | 7,754            | 157               |

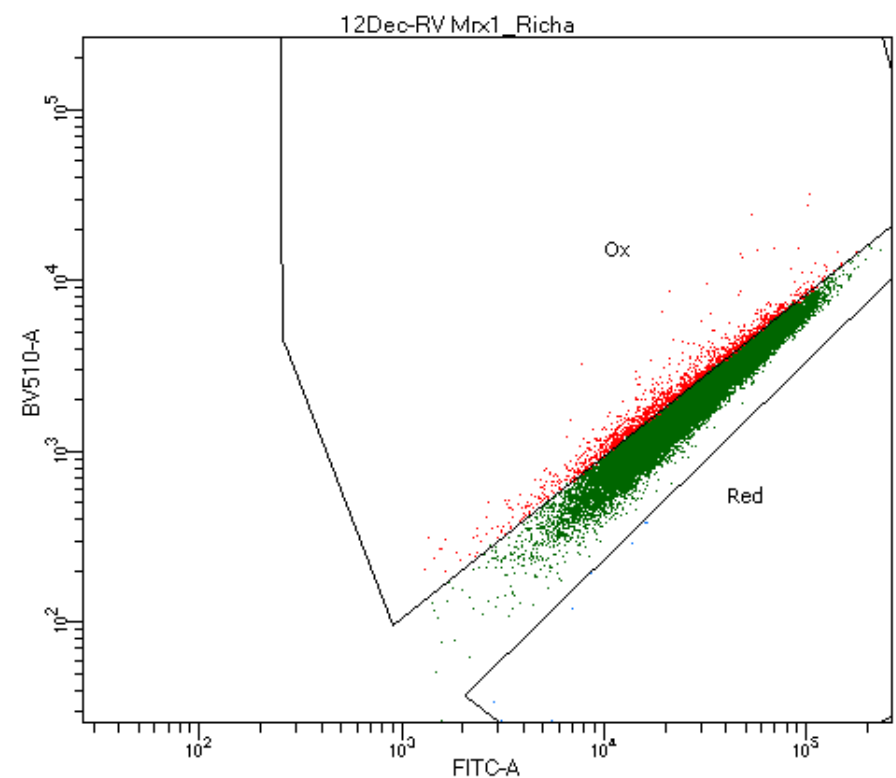

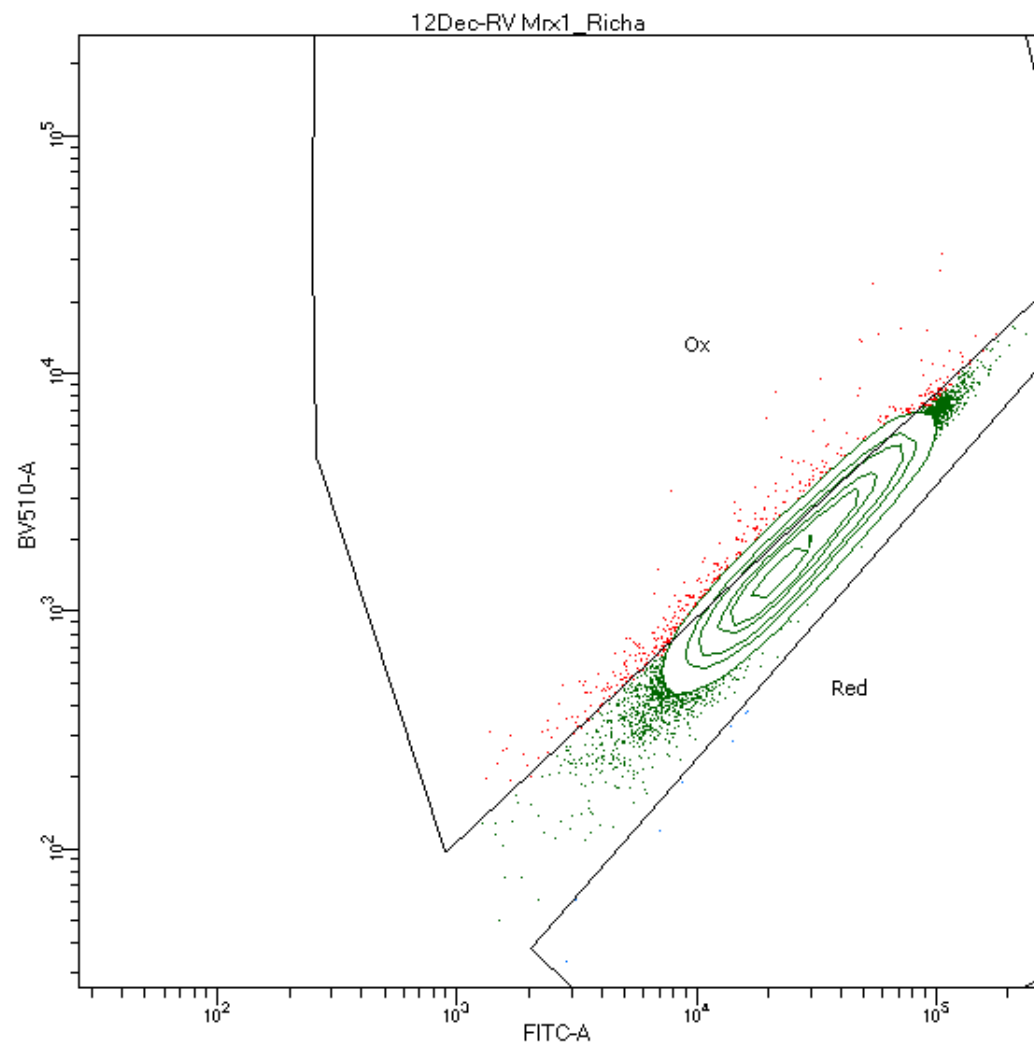

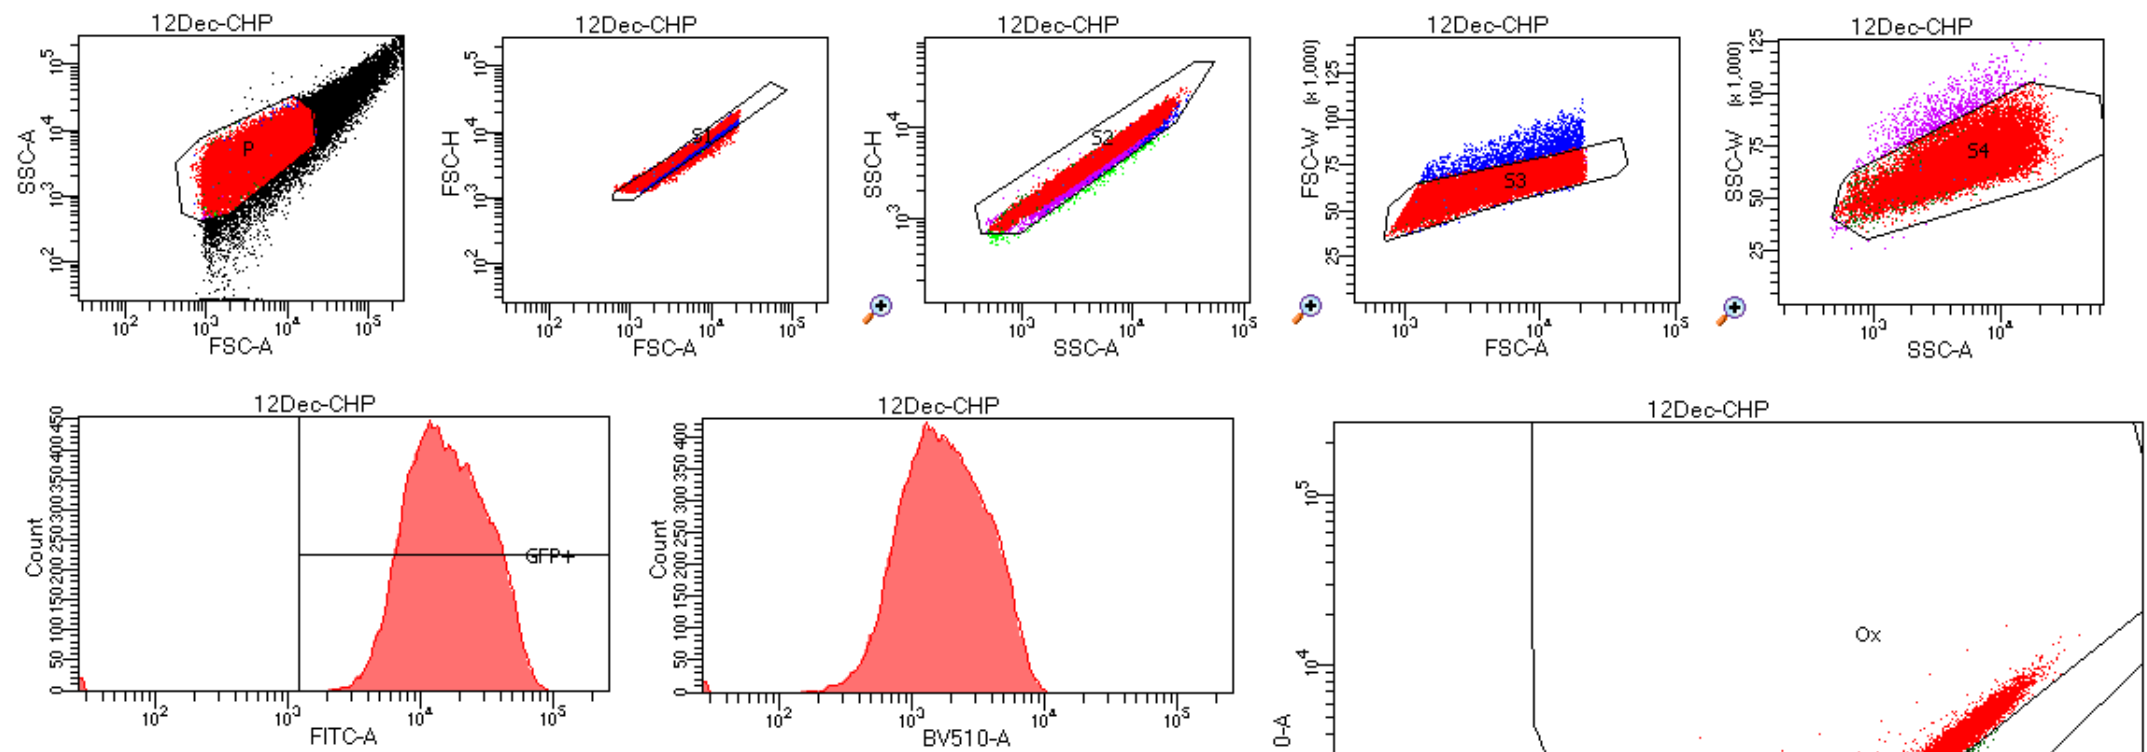

Tube: CHP

| Population | #Events | %Parent | %Total |
|------------|---------|---------|--------|
| All Events | 38,397  | ####    | 100.0  |
| P          | 26,776  | 69.7    | 69.7   |
| S1         | 26,030  | 97.2    | 67.8   |
| S2         | 25,757  | 99.0    | 67.1   |
| S3         | 23,774  | 92.3    | 61.9   |
| S4         | 22,901  | 96.3    | 59.6   |
| GFP+       | 22,809  | 99.6    | 59.4   |
| Ox         | 19,398  | 85.0    | 50.5   |
| Red        | 5       | 0.0     | 0.0    |

|                  |                                    |
|------------------|------------------------------------|
| Experiment Name: | 05EDec2016 Bac sorting             |
| Specimen Name:   | 12Dec                              |
| Tube Name:       | CHP                                |
| Record Date:     | Dec 12, 2016 11:15:35 AM           |
| SOP:             | Administrator                      |
| GUID:            | 1bd45bd7-0565-43f1-bd13-57889ea... |

  

| Population | #Events | %Parent | FITC-A<br>Median | BV510-A<br>Median |
|------------|---------|---------|------------------|-------------------|
| S4         | 22,901  | 96.3    | 14,823           | 1,656             |
| GFP+       | 22,809  | 99.6    | 14,892           | 1,661             |
| Ox         | 19,398  | 85.0    | 16,645           | 1,906             |
| Red        | 5       | 0.0     | 5,270            | 103               |



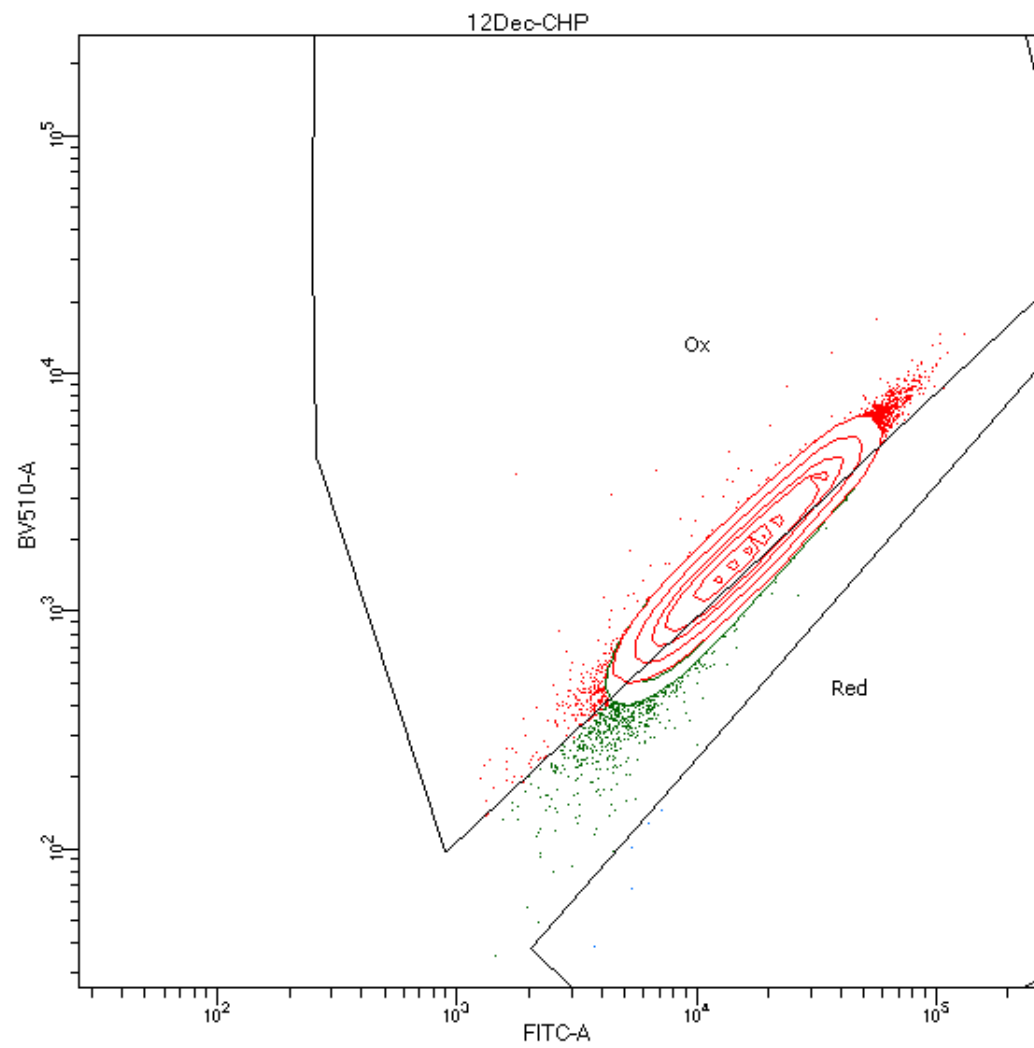

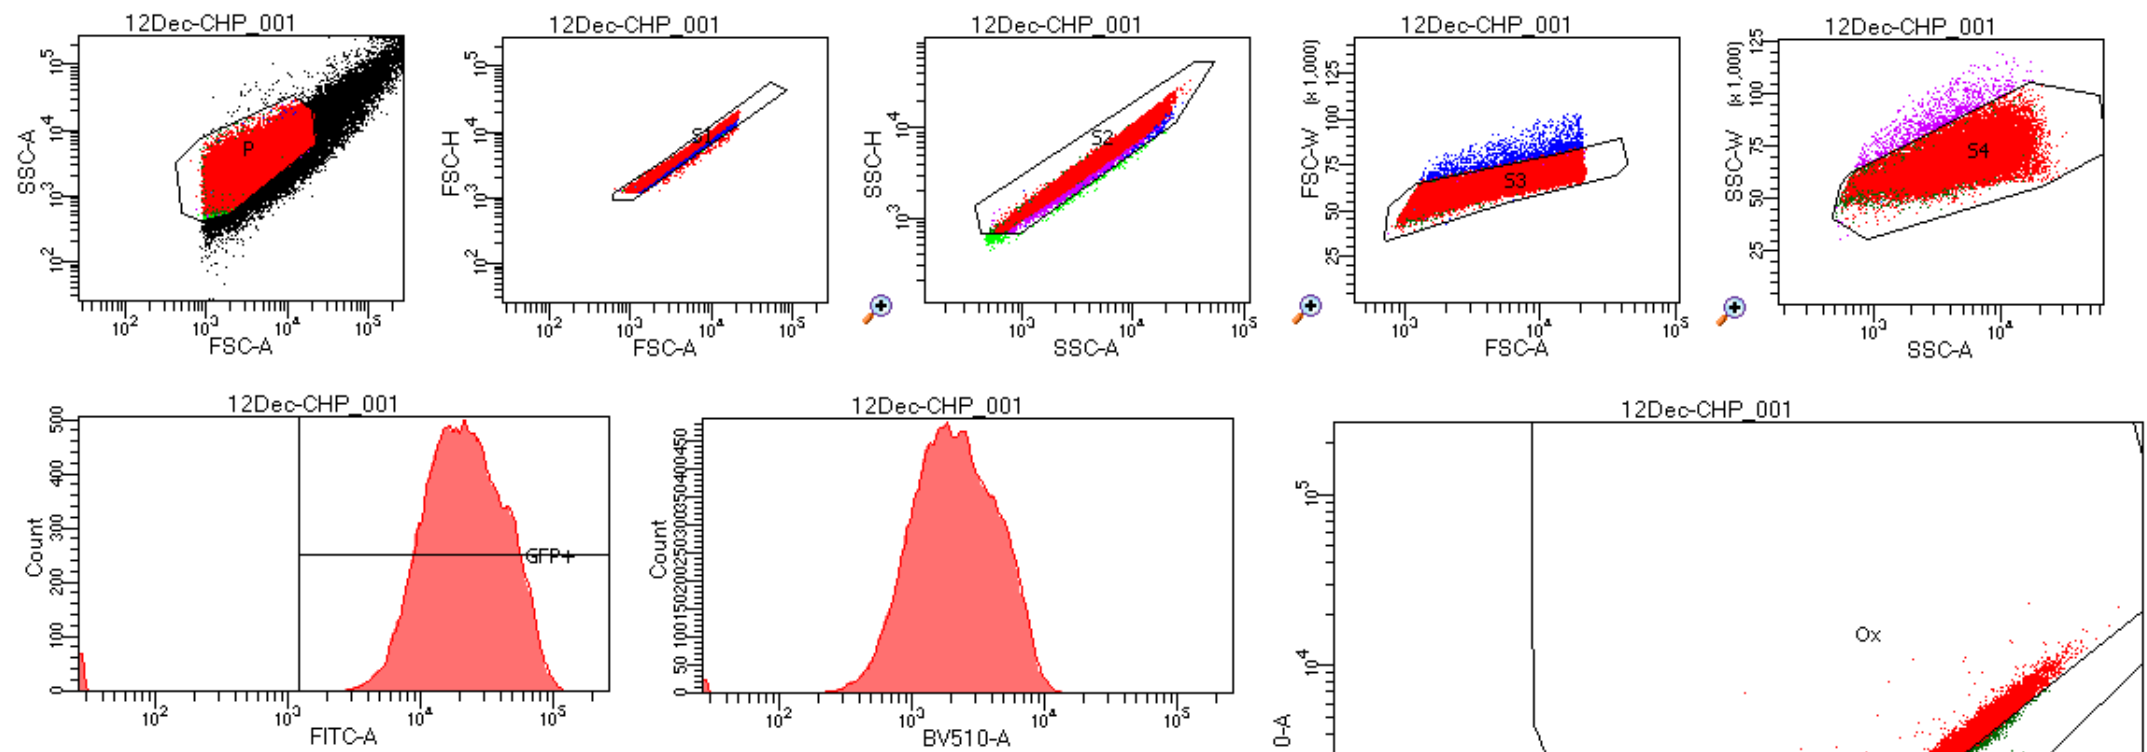

Tube: CHP\_001

| Population | #Events | %Parent | %Total |
|------------|---------|---------|--------|
| All Events | 41,443  | ####    | 100.0  |
| P          | 28,792  | 69.5    | 69.5   |
| S1         | 28,604  | 99.3    | 69.0   |
| S2         | 28,141  | 98.4    | 67.9   |
| S3         | 26,892  | 95.6    | 64.9   |
| S4         | 26,080  | 97.0    | 62.9   |
| GFP+       | 25,853  | 99.1    | 62.4   |
| Ox         | 18,163  | 70.3    | 43.8   |
| Red        | 1       | 0.0     | 0.0    |

|                  |                                    |
|------------------|------------------------------------|
| Experiment Name: | 05EDec2016 Bac sorting             |
| Specimen Name:   | 12Dec                              |
| Tube Name:       | CHP_001                            |
| Record Date:     | Dec 12, 2016 11:16:12 AM           |
| SOP:             | Administrator                      |
| GUID:            | adc93f61-4691-4b21-8445-1327397... |

  

| Population | #Events | %Parent | FITC-A<br>Median | BV510-A<br>Median |
|------------|---------|---------|------------------|-------------------|
| S4         | 26,080  | 97.0    | 20,491           | 2,002             |
| GFP+       | 25,853  | 99.1    | 20,647           | 2,011             |
| Ox         | 18,163  | 70.3    | 24,503           | 2,524             |
| Red        | 1       | 0.0     | 5,419            | 110               |

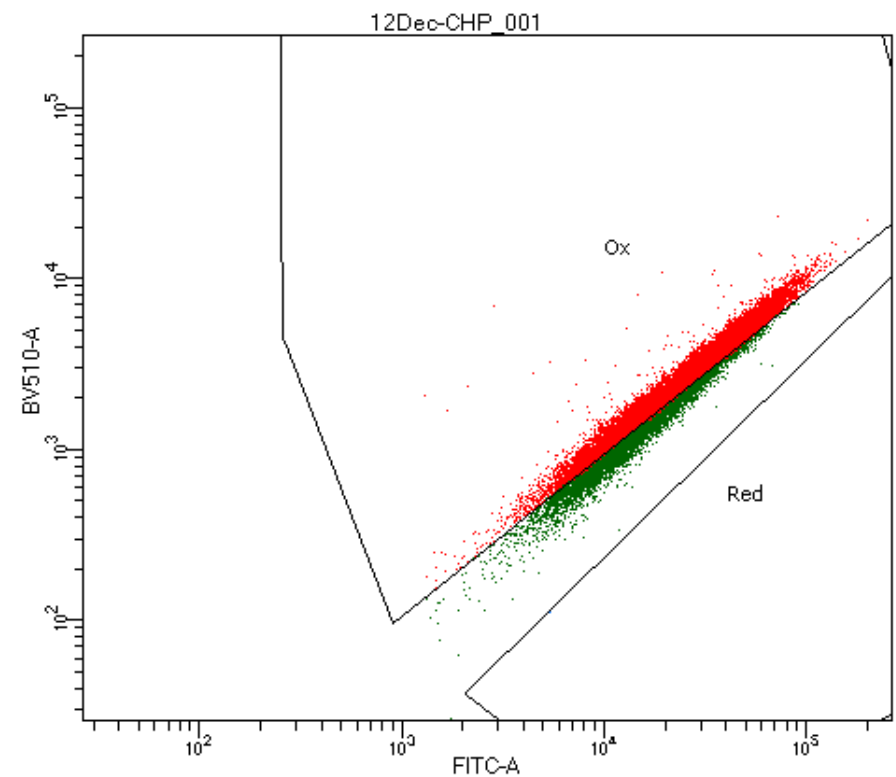

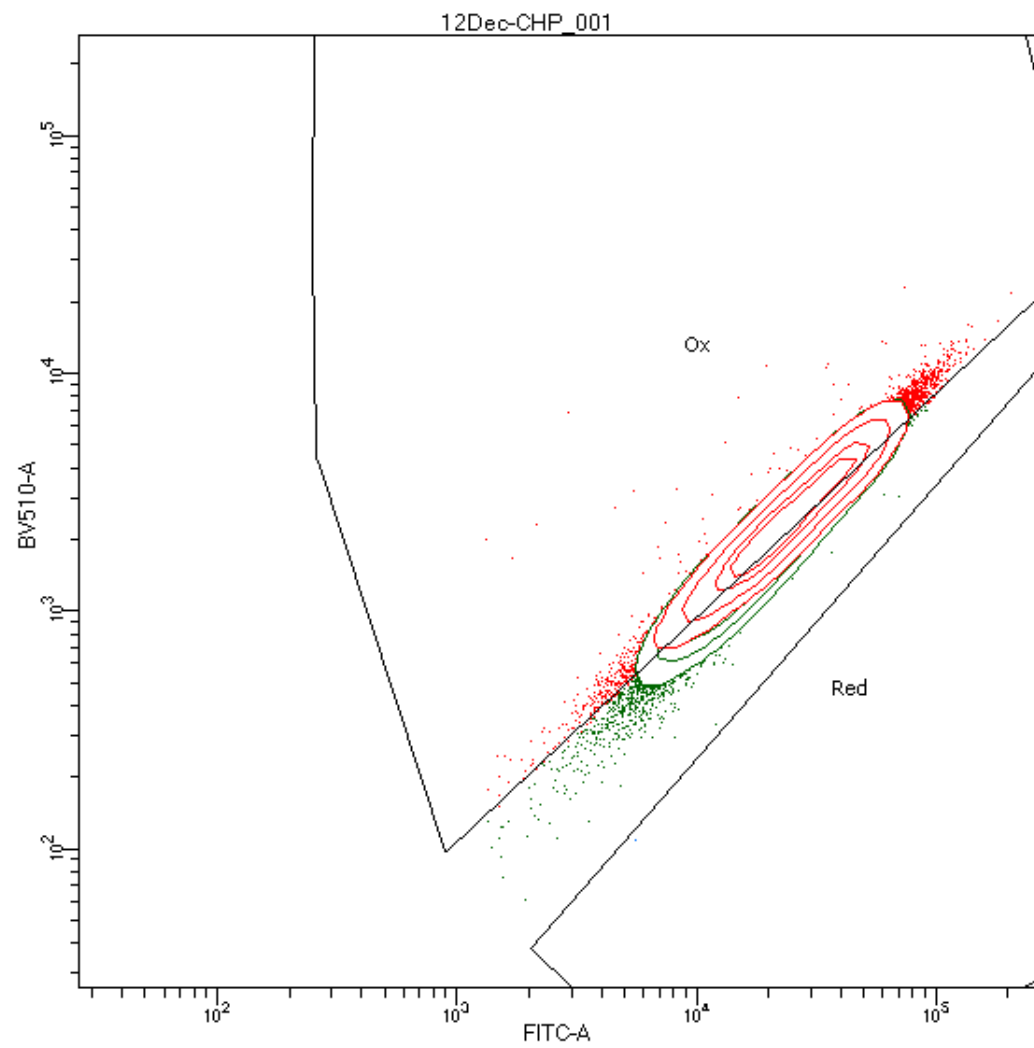

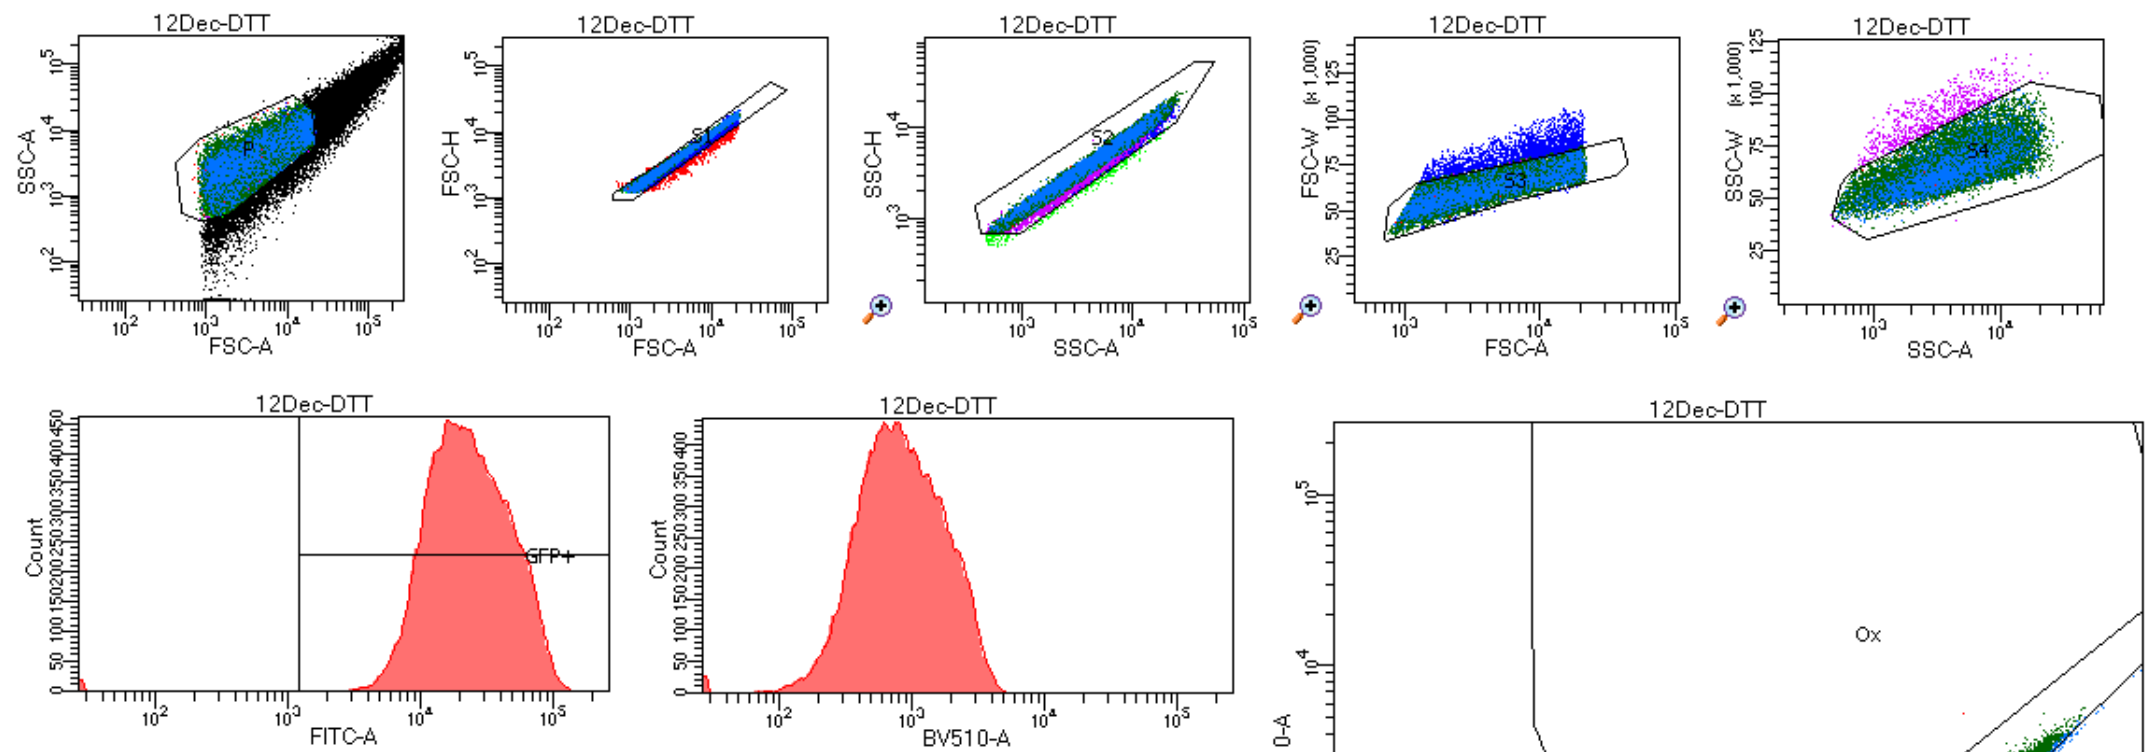

Tube: DTT

| Population | #Events | %Parent | %Total |
|------------|---------|---------|--------|
| All Events | 40,495  | ####    | 100.0  |
| P          | 27,783  | 68.6    | 68.6   |
| S1         | 27,106  | 97.6    | 66.9   |
| S2         | 26,715  | 98.6    | 66.0   |
| S3         | 24,489  | 91.7    | 60.5   |
| S4         | 23,699  | 96.8    | 58.5   |
| GFP+       | 23,614  | 99.6    | 58.3   |
| Ox         | 11      | 0.0     | 0.0    |
| Red        | 2,309   | 9.8     | 5.7    |

|                  |                                    |
|------------------|------------------------------------|
| Experiment Name: | 05EDec2016 Bac sorting             |
| Specimen Name:   | 12Dec                              |
| Tube Name:       | DTT                                |
| Record Date:     | Dec 12, 2016 11:13:59 AM           |
| SOP:             | Administrator                      |
| GUID:            | 2f370c86-2a3b-418f-9351-4930318... |

  

| Population | #Events | %Parent | FITC-A<br>Median | BV510-A<br>Median |
|------------|---------|---------|------------------|-------------------|
| S4         | 23,699  | 96.8    | 21,599           | 777               |
| GFP+       | 23,614  | 99.6    | 21,669           | 780               |
| Ox         | 11      | 0.0     | 8,861            | 1,084             |
| Red        | 2,309   | 9.8     | 22,650           | 578               |

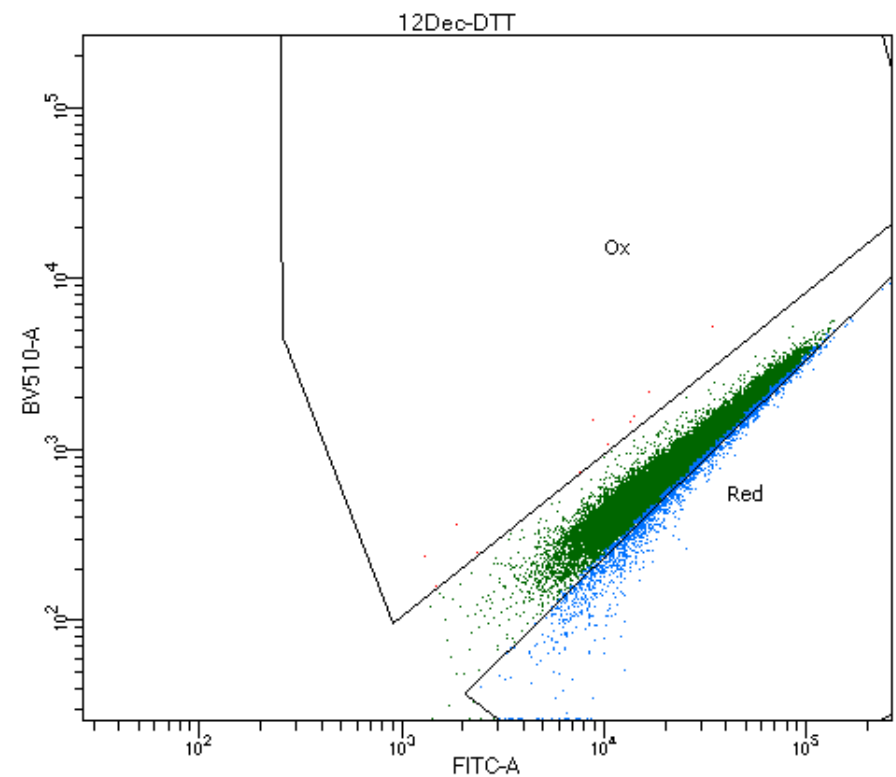

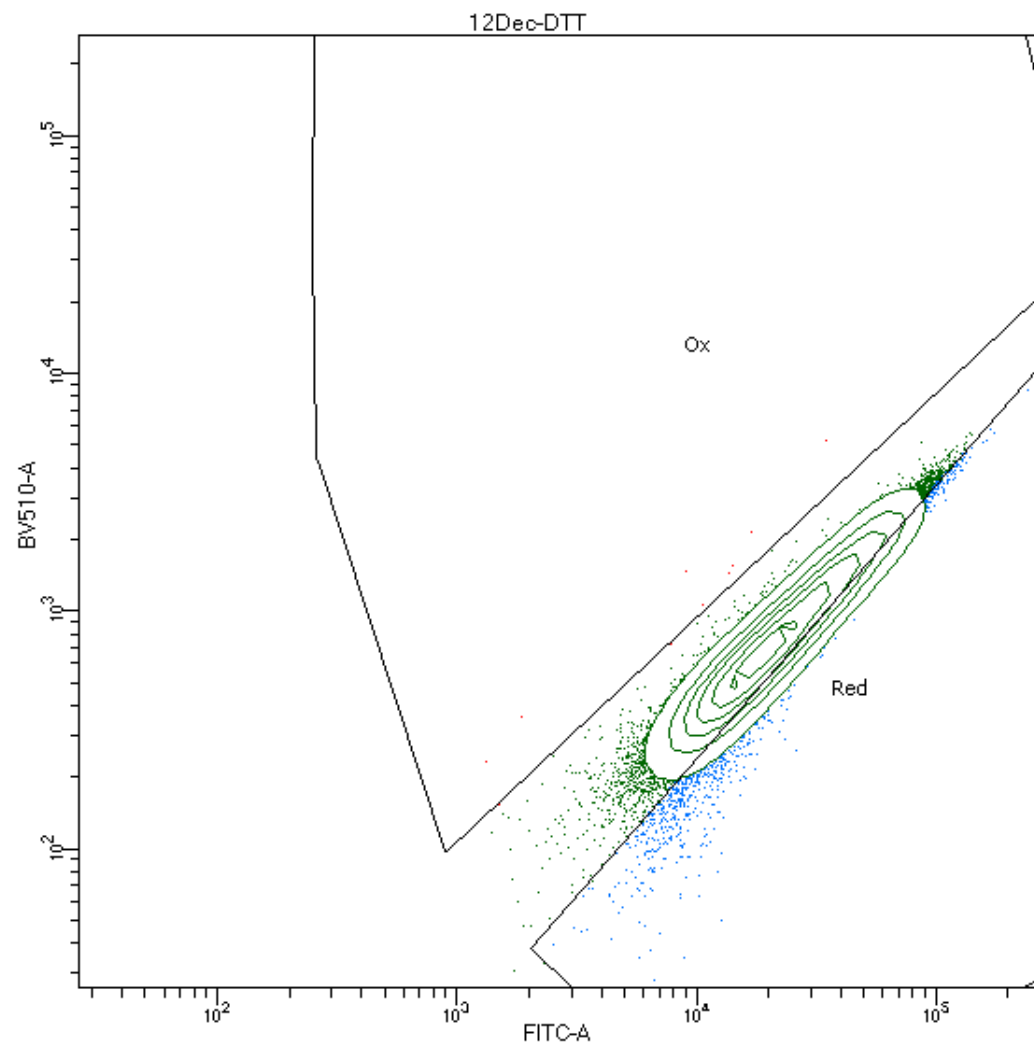

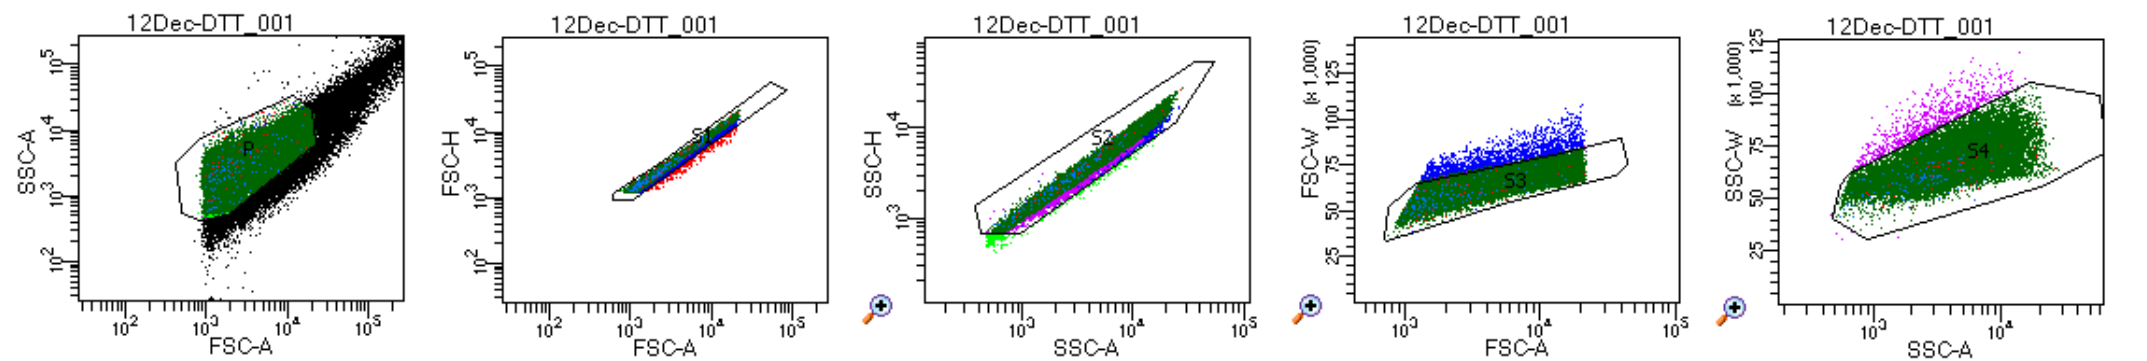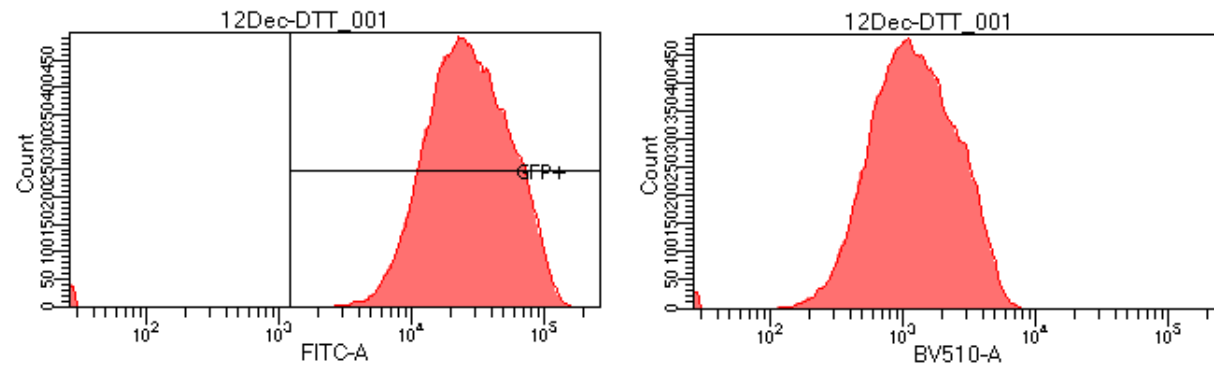

Tube: DTT\_001

| Population | #Events | %Parent | %Total |
|------------|---------|---------|--------|
| All Events | 41,736  | ####    | 100.0  |
| P          | 28,873  | 69.2    | 69.2   |
| S1         | 28,583  | 99.0    | 68.5   |
| S2         | 28,144  | 98.5    | 67.4   |
| S3         | 26,451  | 94.0    | 63.4   |
| S4         | 25,681  | 97.1    | 61.5   |
| GFP+       | 25,536  | 99.4    | 61.2   |
| Ox         | 31      | 0.1     | 0.1    |
| Red        | 113     | 0.4     | 0.3    |

|                  |                                    |
|------------------|------------------------------------|
| Experiment Name: | 05EDec2016 Bac sorting             |
| Specimen Name:   | 12Dec                              |
| Tube Name:       | DTT_001                            |
| Record Date:     | Dec 12, 2016 11:15:02 AM           |
| SOP:             | Administrator                      |
| GUID:            | 7ede832a-725f-417f-a947-3bd50a1... |

  

| Population | #Events | %Parent | FITC-A<br>Median | BV510-A<br>Median |
|------------|---------|---------|------------------|-------------------|
| S4         | 25,681  | 97.1    | 25,468           | 1,145             |
| GFP+       | 25,536  | 99.4    | 25,600           | 1,150             |
| Ox         | 31      | 0.1     | 11,865           | 2,080             |
| Red        | 113     | 0.4     | 13,484           | 296               |

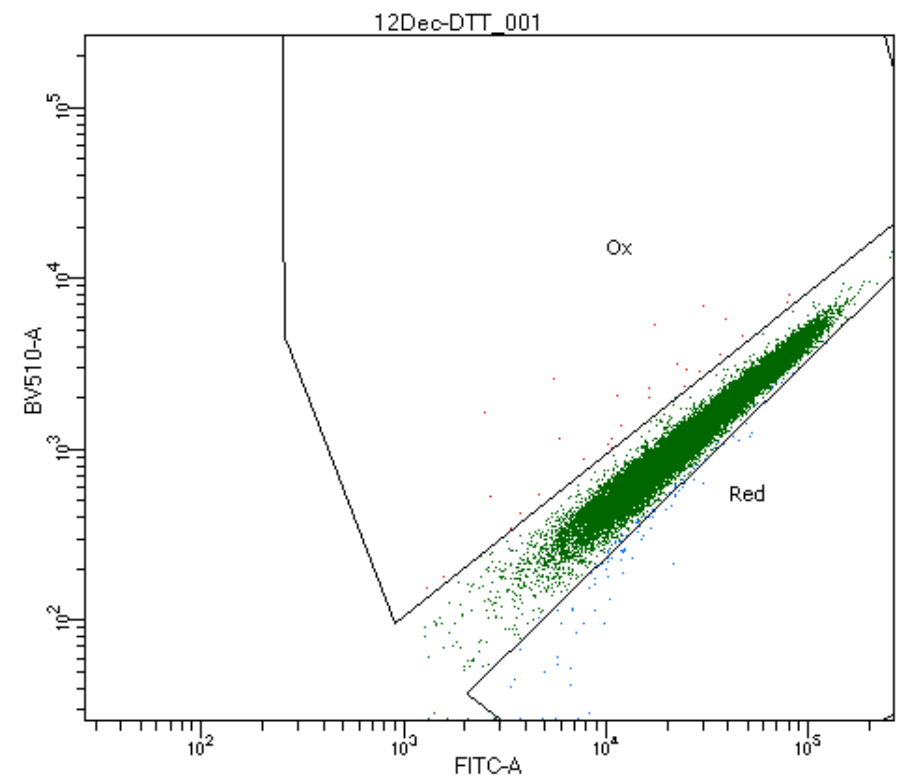

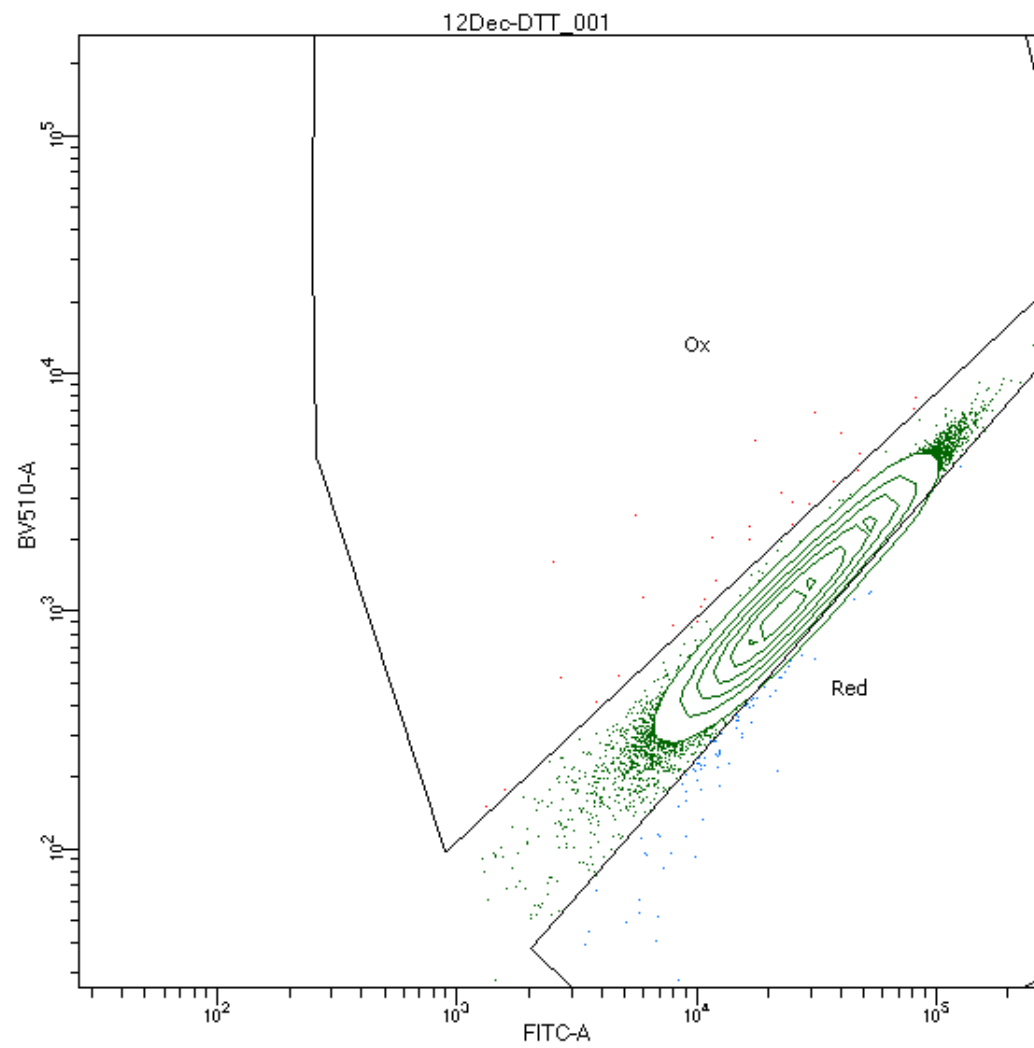

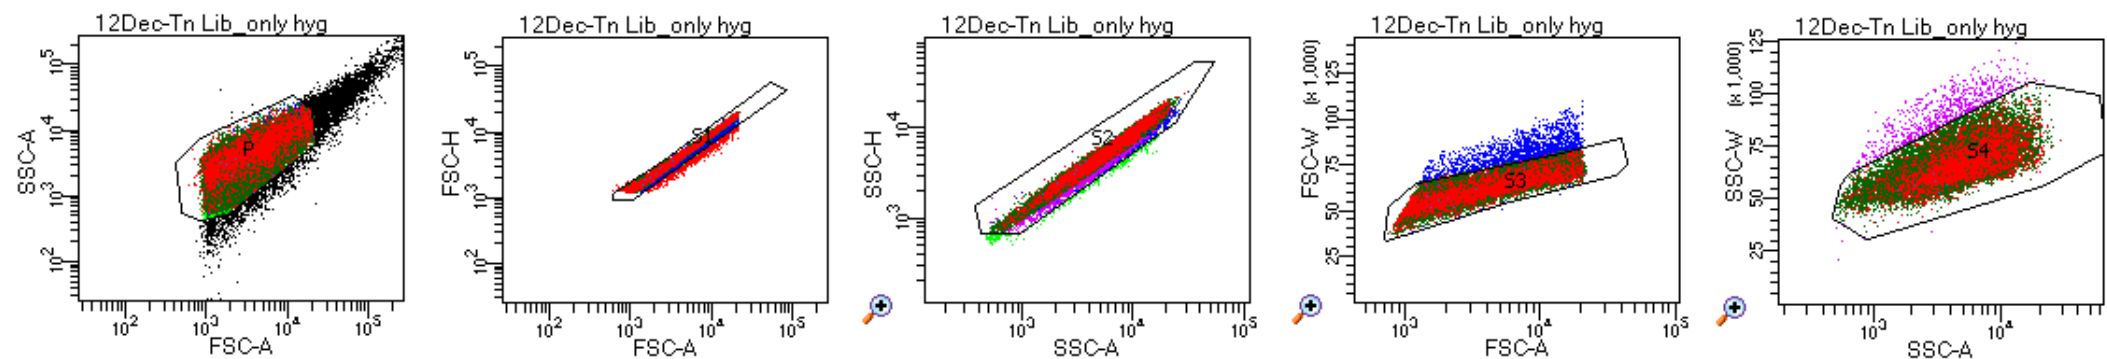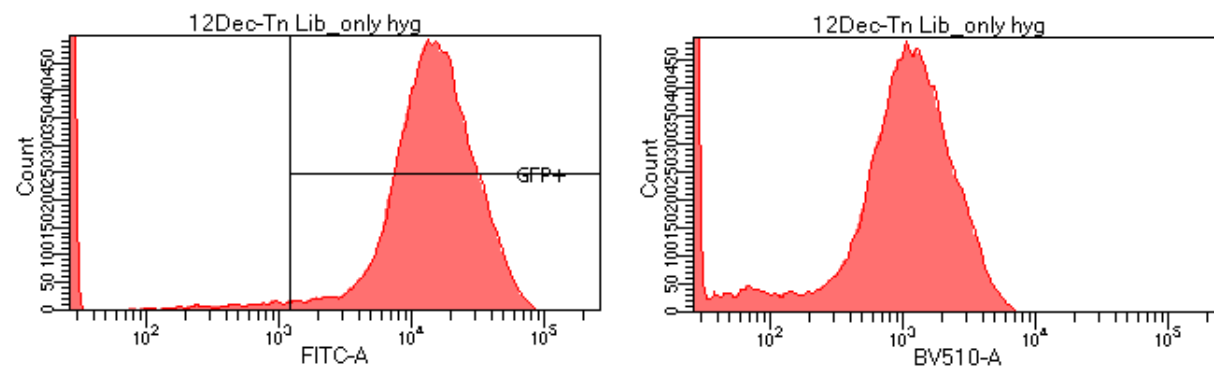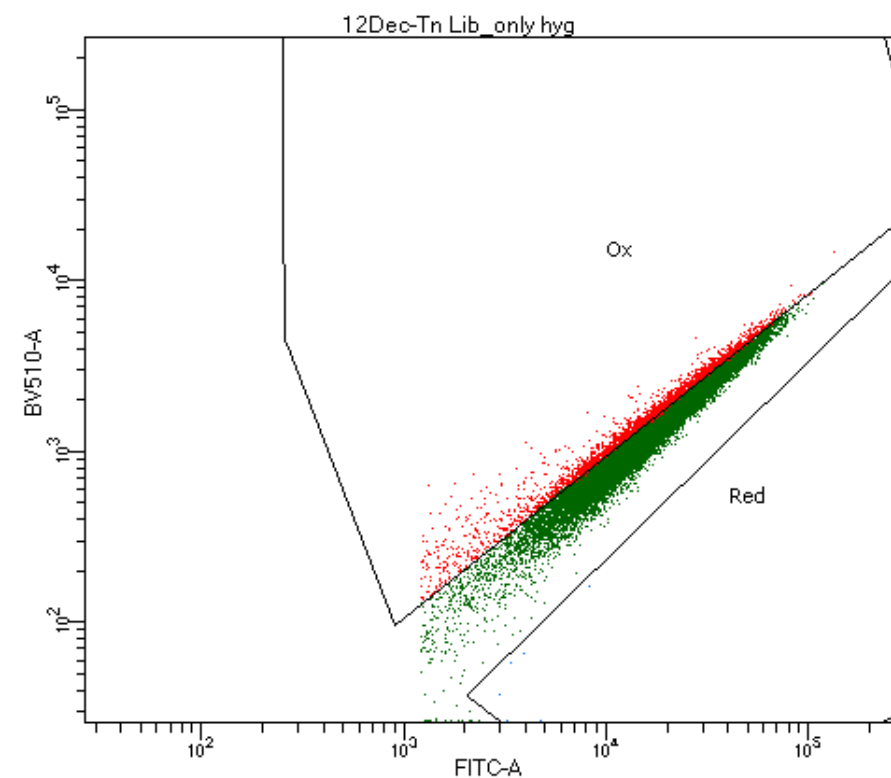

Tube: Tn Lib\_only hyg

| Population | #Events | %Parent | %Total |
|------------|---------|---------|--------|
| All Events | 33,489  | ####    | 100.0  |
| P          | 29,146  | 87.0    | 87.0   |
| S1         | 28,568  | 98.0    | 85.3   |
| S2         | 28,240  | 98.9    | 84.3   |
| S3         | 26,691  | 94.5    | 79.7   |
| S4         | 26,000  | 97.4    | 77.6   |
| GFP+       | 22,227  | 85.5    | 66.4   |
| Ox         | 2,663   | 12.0    | 8.0    |
| Red        | 6       | 0.0     | 0.0    |

Experiment Name: 05EDec2016 Bac sorting  
 Specimen Name: 12Dec  
 Tube Name: Tn Lib\_only hyg  
 Record Date: Dec 12, 2016 11:17:20 AM  
 SOP: Administrator  
 GUID: f533065a-8e46-4470-9fd7-f5eac910...

| Population | #Events | %Parent | FITC-A<br>Median | BV510-A<br>Median |
|------------|---------|---------|------------------|-------------------|
| S4         | 26,000  | 97.4    | 12,657           | 974               |
| GFP+       | 22,227  | 85.5    | 14,527           | 1,121             |
| Ox         | 2,663   | 12.0    | 16,098           | 1,551             |
| Red        | 6       | 0.0     | 3,656            | 48                |



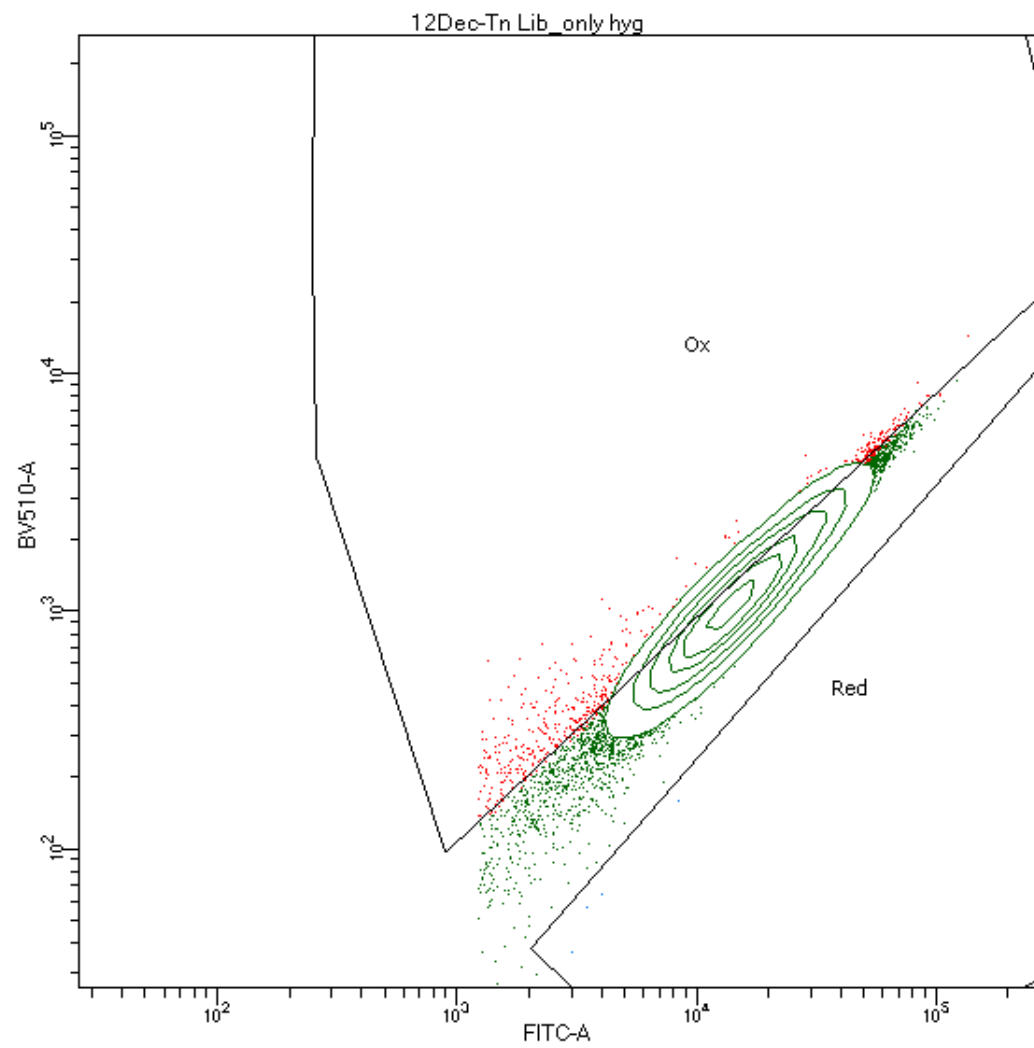

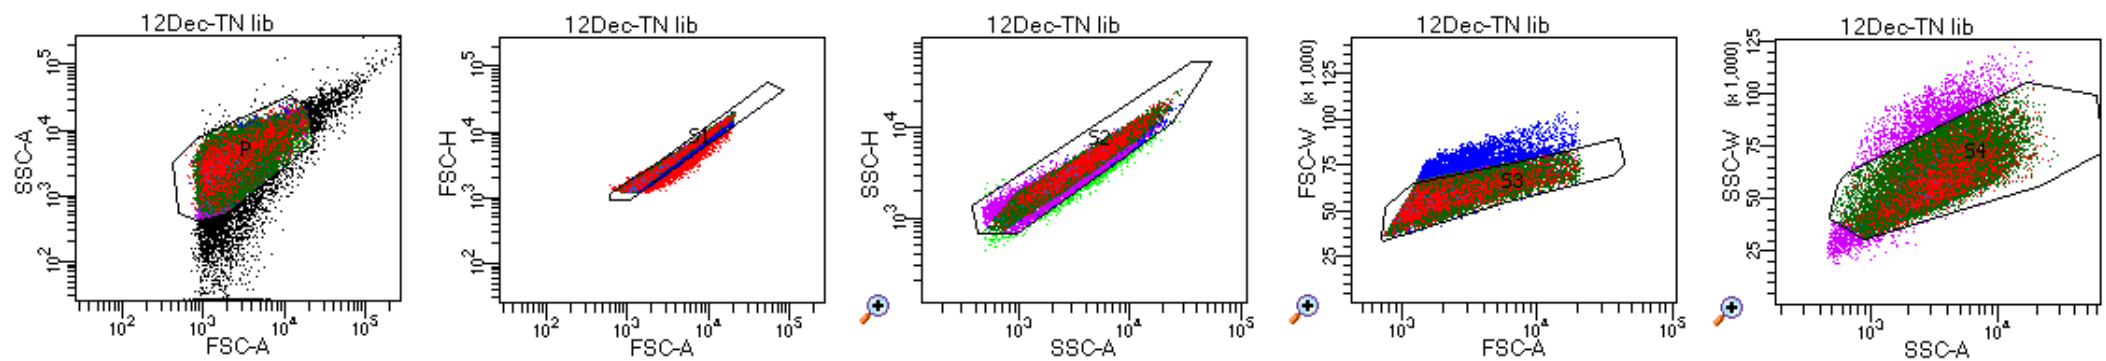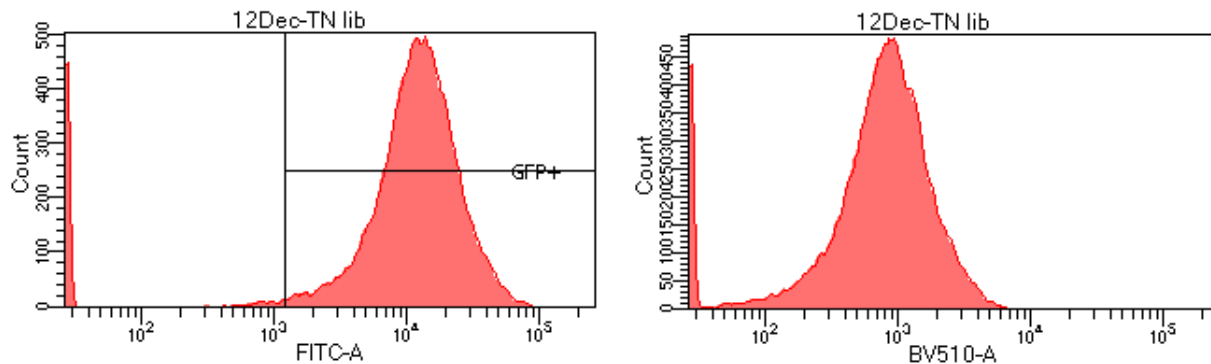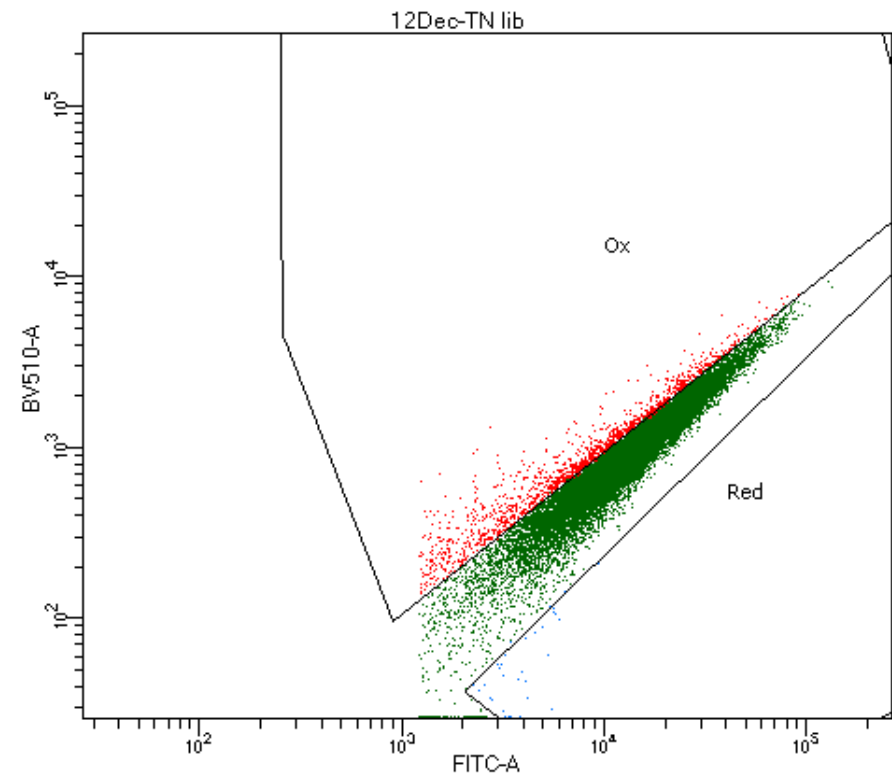

| Population | #Events | %Parent | %Total |
|------------|---------|---------|--------|
| All Events | 34,514  | ####    | 100.0  |
| P          | 30,678  | 88.9    | 88.9   |
| S1         | 29,028  | 94.6    | 84.1   |
| S2         | 28,414  | 97.9    | 82.3   |
| S3         | 25,172  | 88.6    | 72.9   |
| S4         | 22,899  | 91.0    | 66.3   |
| GFP+       | 21,323  | 93.1    | 61.8   |
| Ox         | 1,427   | 6.7     | 4.1    |
| Red        | 34      | 0.2     | 0.1    |

|                  |                                   |  |  |  |
|------------------|-----------------------------------|--|--|--|
| Experiment Name: | 05EDec2016 Bac sorting            |  |  |  |
| Specimen Name:   | 12Dec                             |  |  |  |
| Tube Name:       | TN lib                            |  |  |  |
| Record Date:     | Dec 12, 2016 11:17:55 AM          |  |  |  |
| \$OP:            | Administrator                     |  |  |  |
| GUID:            | 61059bc0-924a-4566-b2a9-bb7c85... |  |  |  |

  

| Population                                                                             | #Events | %Parent | FITC-A<br>Median | BV510-A<br>Median |
|----------------------------------------------------------------------------------------|---------|---------|------------------|-------------------|
|  S4   | 22,899  | 91.0    | 11,467           | 775               |
|  GFP+ | 21,323  | 93.1    | 12,131           | 822               |
|  Ox   | 1,427   | 6.7     | 7,391            | 800               |
|  Red  | 34      | 0.2     | 3,583            | 48                |

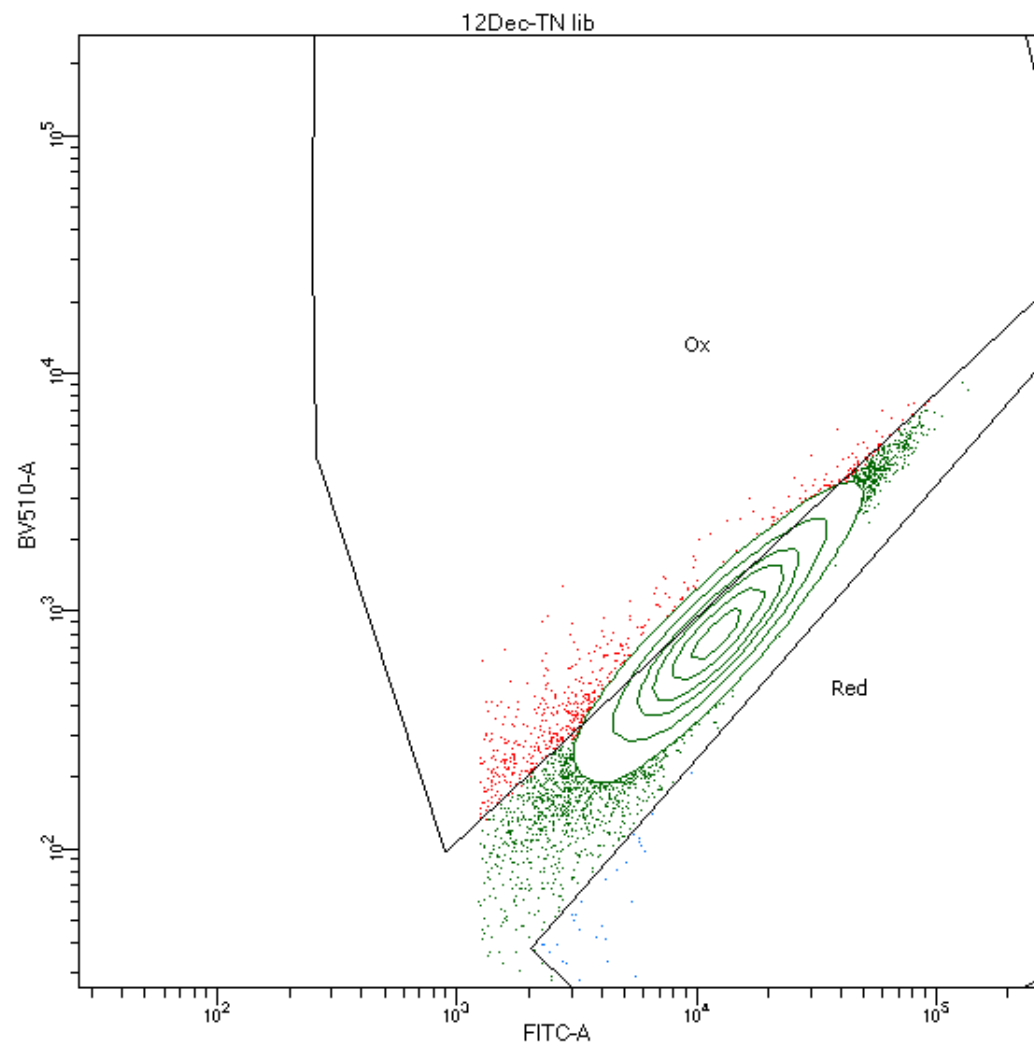

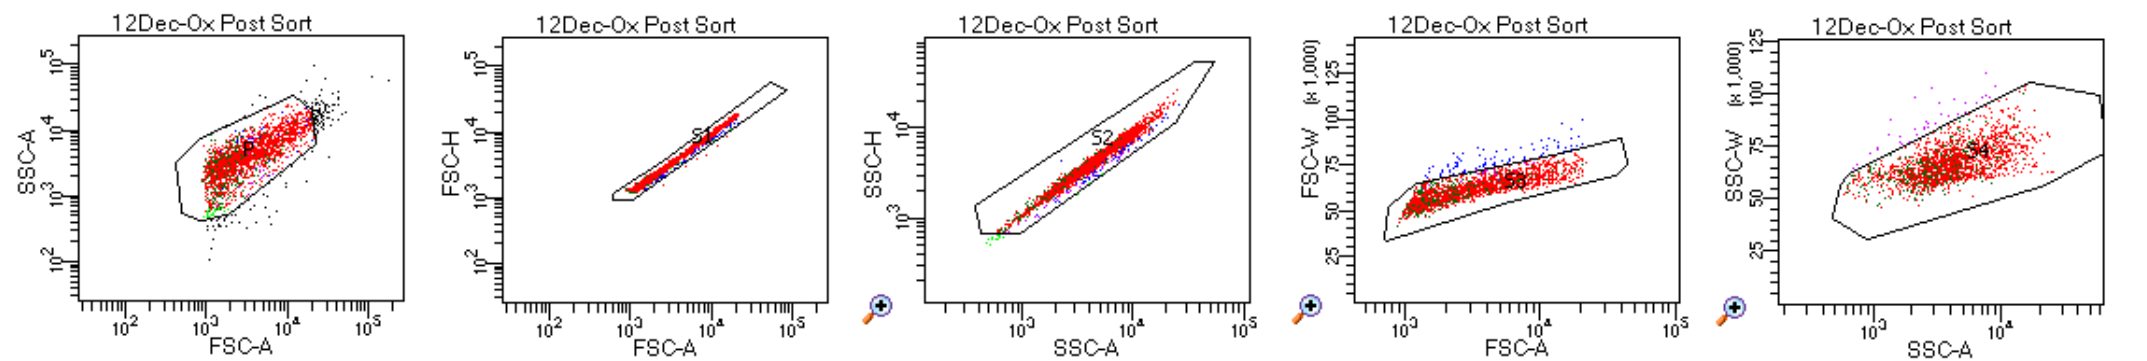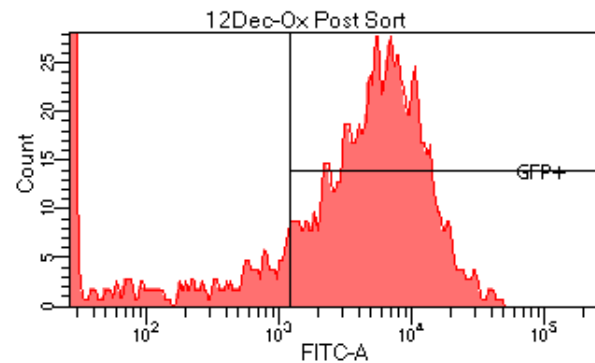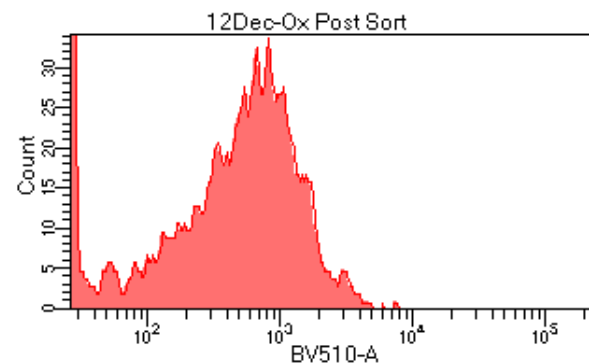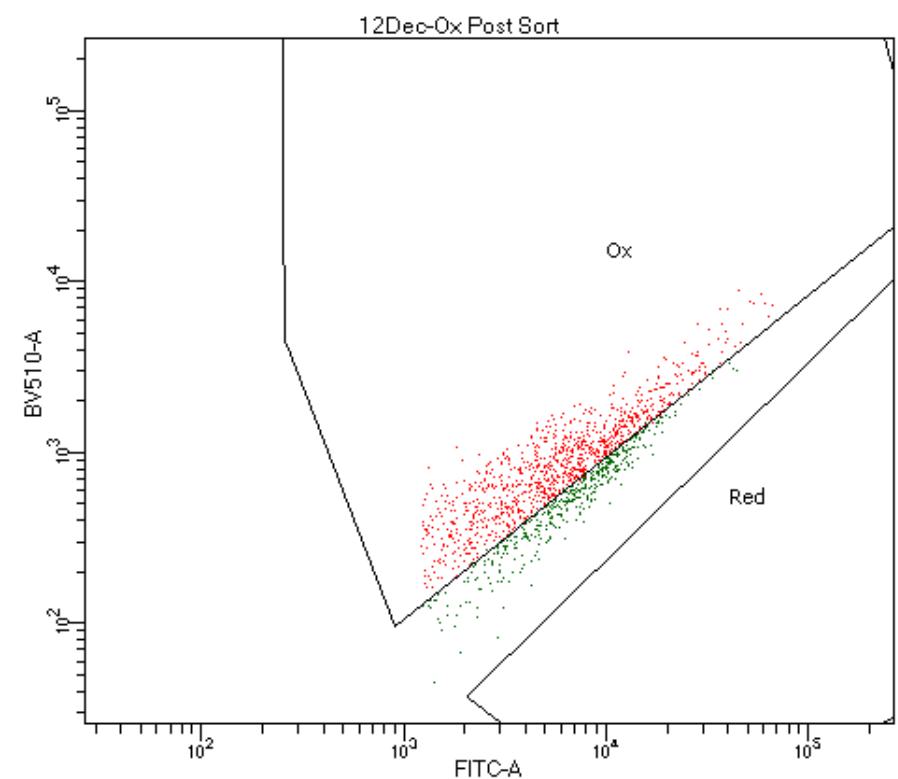

Tube: Ox Post Sort

| Population | #Events | %Parent | %Total |
|------------|---------|---------|--------|
| All Events | 2,226   | ####    | 100.0  |
| P          | 2,078   | 93.4    | 93.4   |
| S1         | 2,071   | 99.7    | 93.0   |
| S2         | 2,042   | 98.6    | 91.7   |
| S3         | 1,954   | 95.7    | 87.8   |
| S4         | 1,919   | 98.2    | 86.2   |
| GFP+       | 1,403   | 73.1    | 63.0   |
| Ox         | 954     | 68.0    | 42.9   |
| Red        | 0       | 0.0     | 0.0    |

Experiment Name: 05EDec2016 Bac sorting  
 Specimen Name: 12Dec  
 Tube Name: Ox Post Sort  
 Record Date: Dec 12, 2016 3:09:48 PM  
 SOP: Administrator  
 GUID: 320e8542-f8f2-4ec4-ab6d-f1468a19...

| Population | #Events | %Parent | FITC-A<br>Median | BV510-A<br>Median |
|------------|---------|---------|------------------|-------------------|
| S4         | 1,919   | 98.2    | 4,056            | 523               |
| GFP+       | 1,403   | 73.1    | 6,027            | 727               |
| Ox         | 954     | 68.0    | 5,492            | 821               |
| Red        | 0       | 0.0     | ####             | ####              |

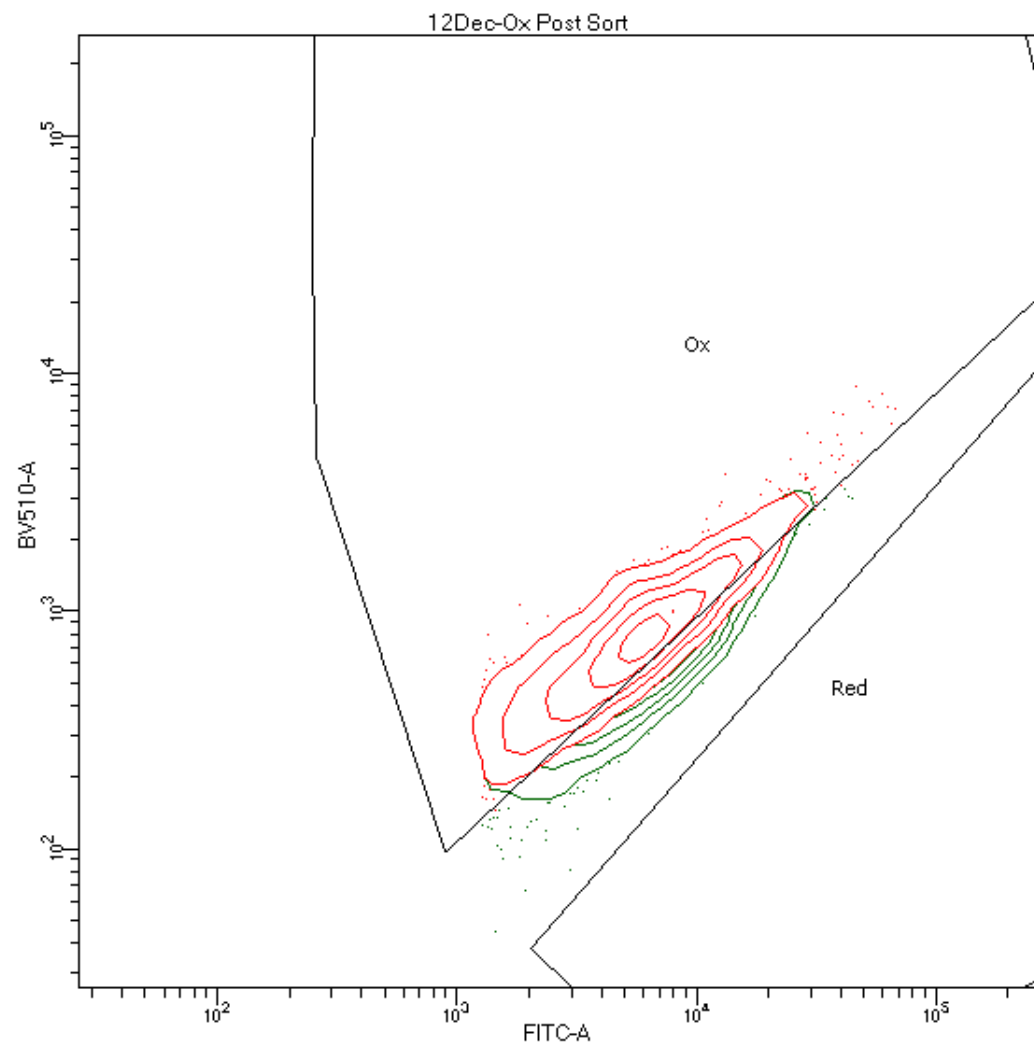

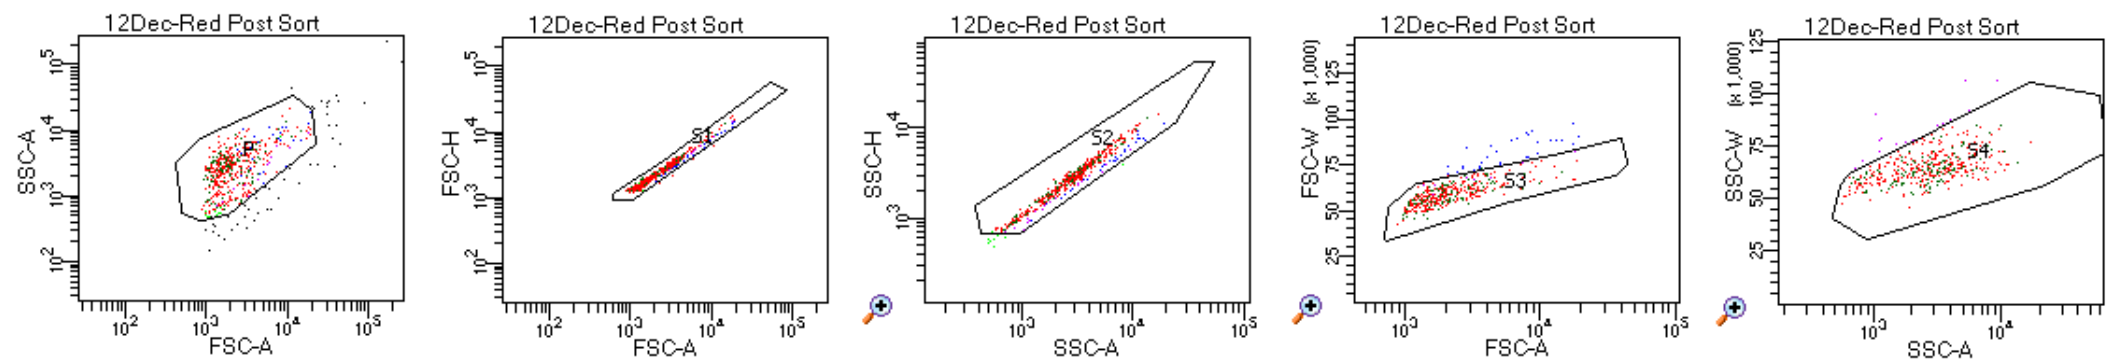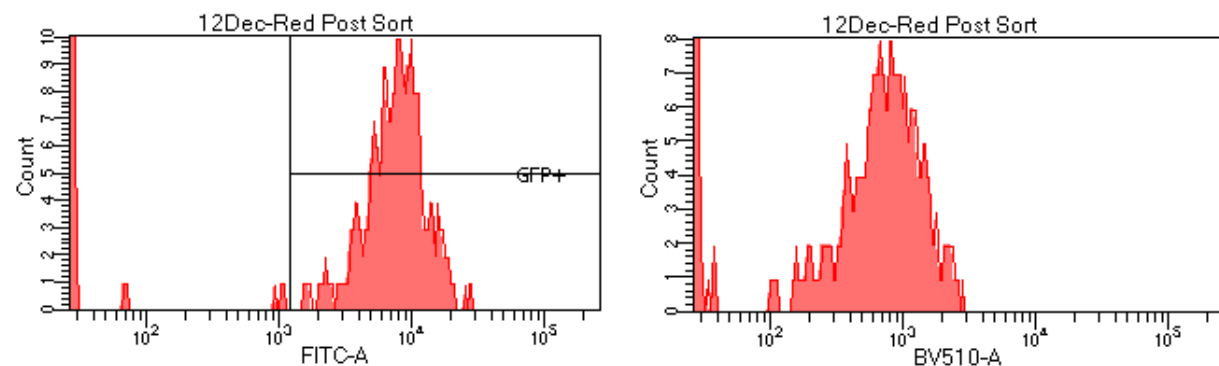

Tube: Red Post Sort

| Population | #Events | %Parent | %Total |
|------------|---------|---------|--------|
| All Events | 531     | ####    | 100.0  |
| P          | 480     | 90.4    | 90.4   |
| S1         | 474     | 98.8    | 89.3   |
| S2         | 461     | 97.3    | 86.8   |
| S3         | 431     | 93.5    | 81.2   |
| S4         | 413     | 95.8    | 77.8   |
| GFP+       | 343     | 83.1    | 64.6   |
| Ox         | 206     | 60.1    | 38.8   |
| Red        | 0       | 0.0     | 0.0    |

|                  |                                     |
|------------------|-------------------------------------|
| Experiment Name: | 05EDec2016 Bac sorting              |
| Specimen Name:   | 12Dec                               |
| Tube Name:       | Red Post Sort                       |
| Record Date:     | Dec 12, 2016 3:10:29 PM             |
| SOP:             | Administrator                       |
| GUID:            | 25a9223e-6a10-48cd-87aa-294fff6a... |

  

| Population | #Events | %Parent | FITC-A Median | BV510-A Median |
|------------|---------|---------|---------------|----------------|
| S4         | 413     | 95.8    | 6,589         | 632            |
| GFP+       | 343     | 83.1    | 7,594         | 758            |
| Ox         | 206     | 60.1    | 8,263         | 973            |
| Red        | 0       | 0.0     | ####          | ####           |

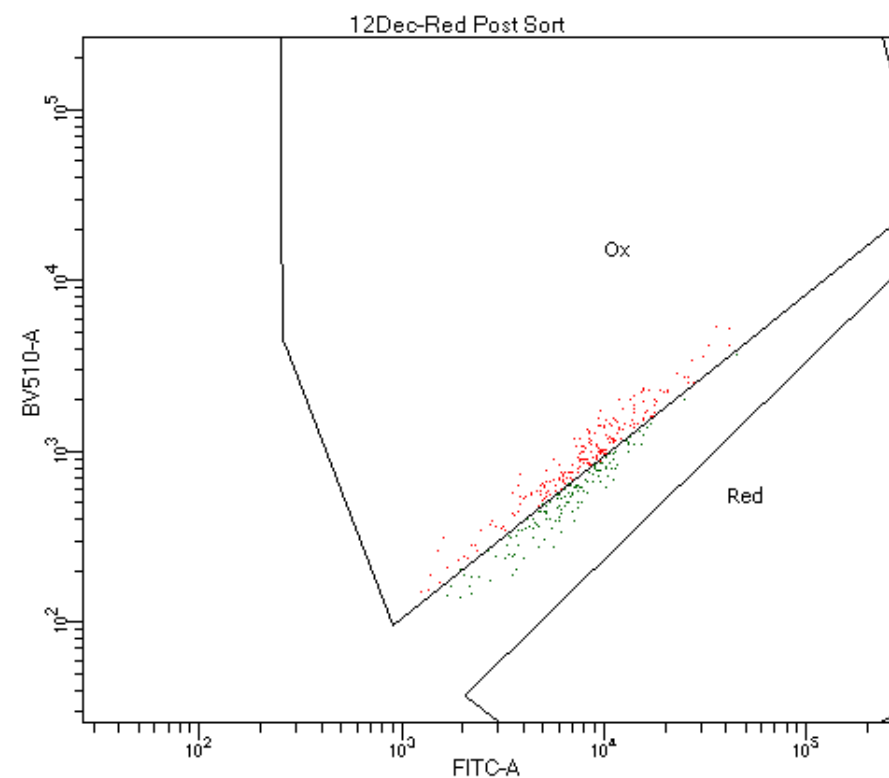

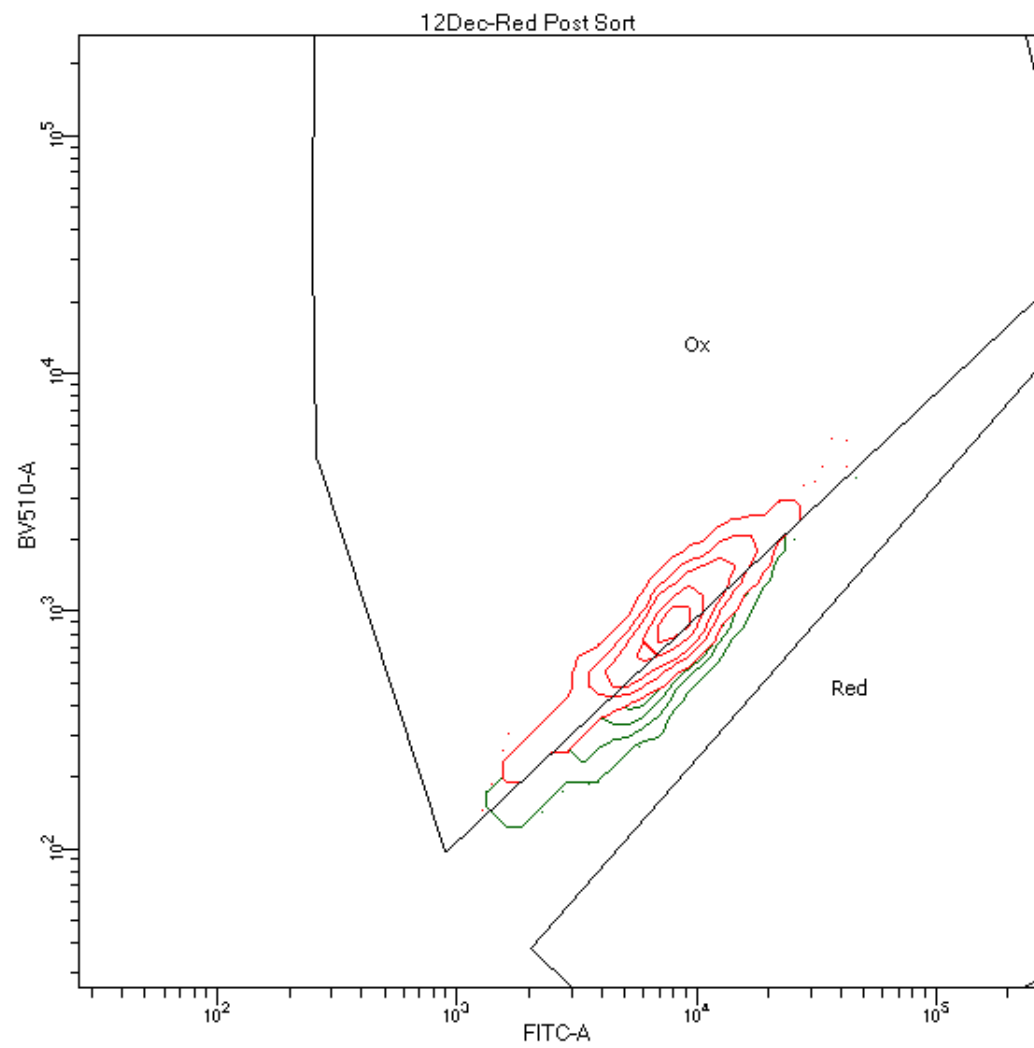

Supplement: supp [file elife-80218-supp-v1.zip]
