# Supplementary material for: Biosensor-integrated transposon mutagenesis reveals rv0158 as a coordinator of redox homeostasis in Mycobacterium tuberculosis
Source: eLife journal article supplement (doi:10.7554/elife.80218), 2023-08-29

# Batch Analysis Report

Run Date: 12/5/16 4:30 PM

Experiment: 05EDec2016 Bac sorting

User ID: Administrator

Statistics Output: N/A

Worksheet PDF Output: C:\Users\Admin\Desktop\05EDec2016 Bac sorting-Batch\_Analysis\_0512  
2016163007.pdf

**05Dec**

| Tube          | Status | Run Time        |
|---------------|--------|-----------------|
| US            | OK     | 12/5/16 4:30 PM |
| RV Mrx1       | OK     | 12/5/16 4:30 PM |
| RV Mrx1_001   | OK     | 12/5/16 4:30 PM |
| CHP           | OK     | 12/5/16 4:30 PM |
| CHP_001       | OK     | 12/5/16 4:30 PM |
| DTT           | OK     | 12/5/16 4:30 PM |
| DTT_001       | OK     | 12/5/16 4:30 PM |
| TN lib        | OK     | 12/5/16 4:30 PM |
| Ox Post Sort  | OK     | 12/5/16 4:30 PM |
| Red Post Sort | OK     | 12/5/16 4:30 PM |
| Ox_001        | OK     | 12/5/16 4:30 PM |
| Ox_002        | OK     | 12/5/16 4:30 PM |
| Ox_003        | OK     | 12/5/16 4:30 PM |
| CHP_01        | OK     | 12/5/16 4:30 PM |
| CHP_02        | OK     | 12/5/16 4:30 PM |

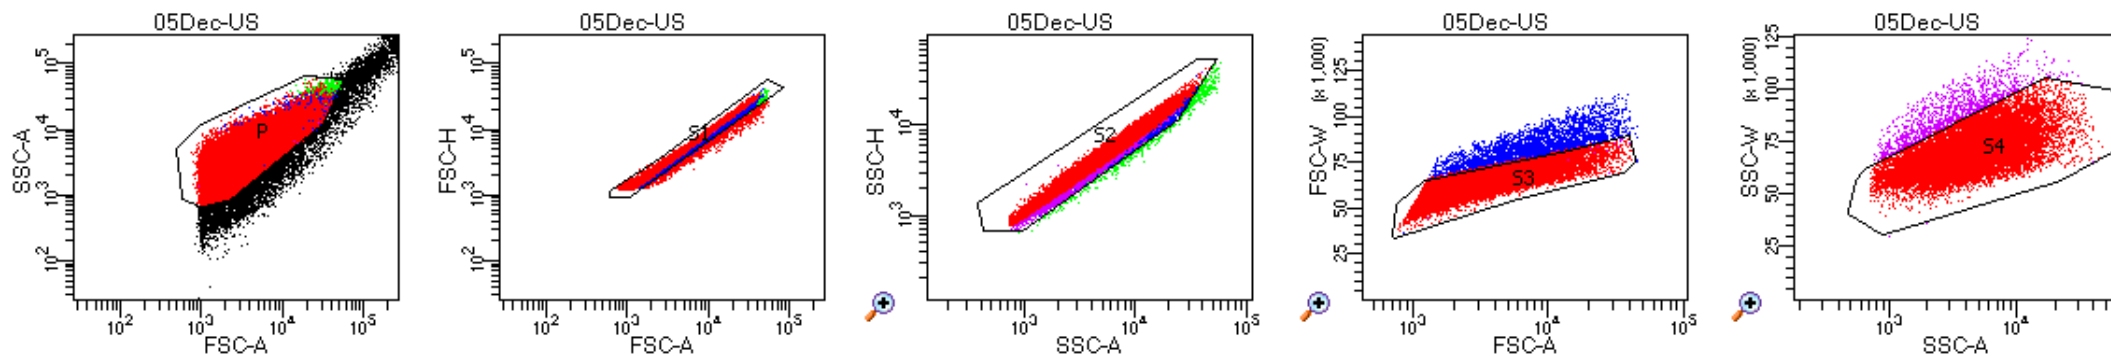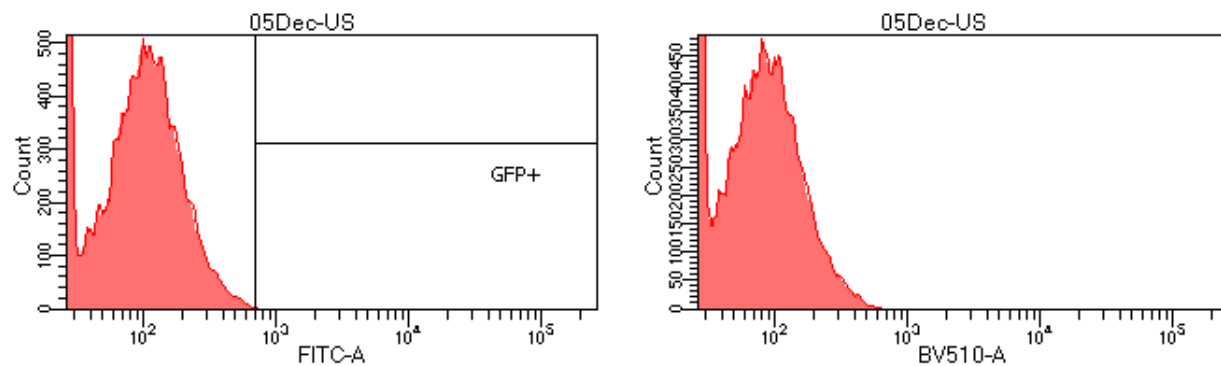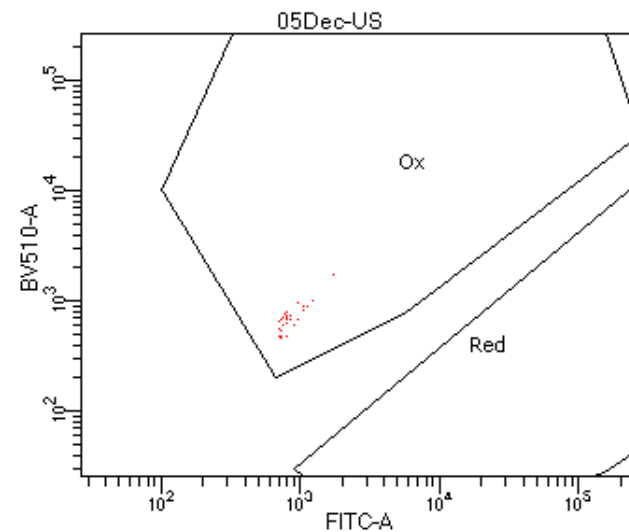

Tube: US

| Population | #Events | %Parent | %Total |
|------------|---------|---------|--------|
| All Events | 33,894  | ####    | 100.0  |
| P          | 28,307  | 83.5    | 83.5   |
| S1         | 27,040  | 95.5    | 79.8   |
| S2         | 26,429  | 97.7    | 78.0   |
| S3         | 23,363  | 88.4    | 68.9   |
| S4         | 22,240  | 95.2    | 65.6   |
| GFP+       | 27      | 0.1     | 0.1    |
| Ox         | 27      | 100.0   | 0.1    |
| Red        | 0       | 0.0     | 0.0    |

|                  |                                 |  |  |  |
|------------------|---------------------------------|--|--|--|
| Experiment Name: | 05EDec2016 Bac sorting          |  |  |  |
| Specimen Name:   | 05Dec                           |  |  |  |
| Tube Name:       | US                              |  |  |  |
| Record Date:     | Dec 5, 2016 2:13:30 PM          |  |  |  |
| SOP:             | Administrator                   |  |  |  |
| GUID:            | 6efe2ceb-978a-4869-9f54-ef0d... |  |  |  |

  

| Population                                                                                 | #Events | %Parent | FITC-A<br>Median | BV510-A<br>Median |
|--------------------------------------------------------------------------------------------|---------|---------|------------------|-------------------|
|  S4   | 22,240  | 95.2    | 95               | 74                |
|  GFP+ | 27      | 0.1     | 786              | 678               |
|  Ox   | 27      | 100.0   | 786              | 678               |
|  Red  | 0       | 0.0     | ####             | ####              |

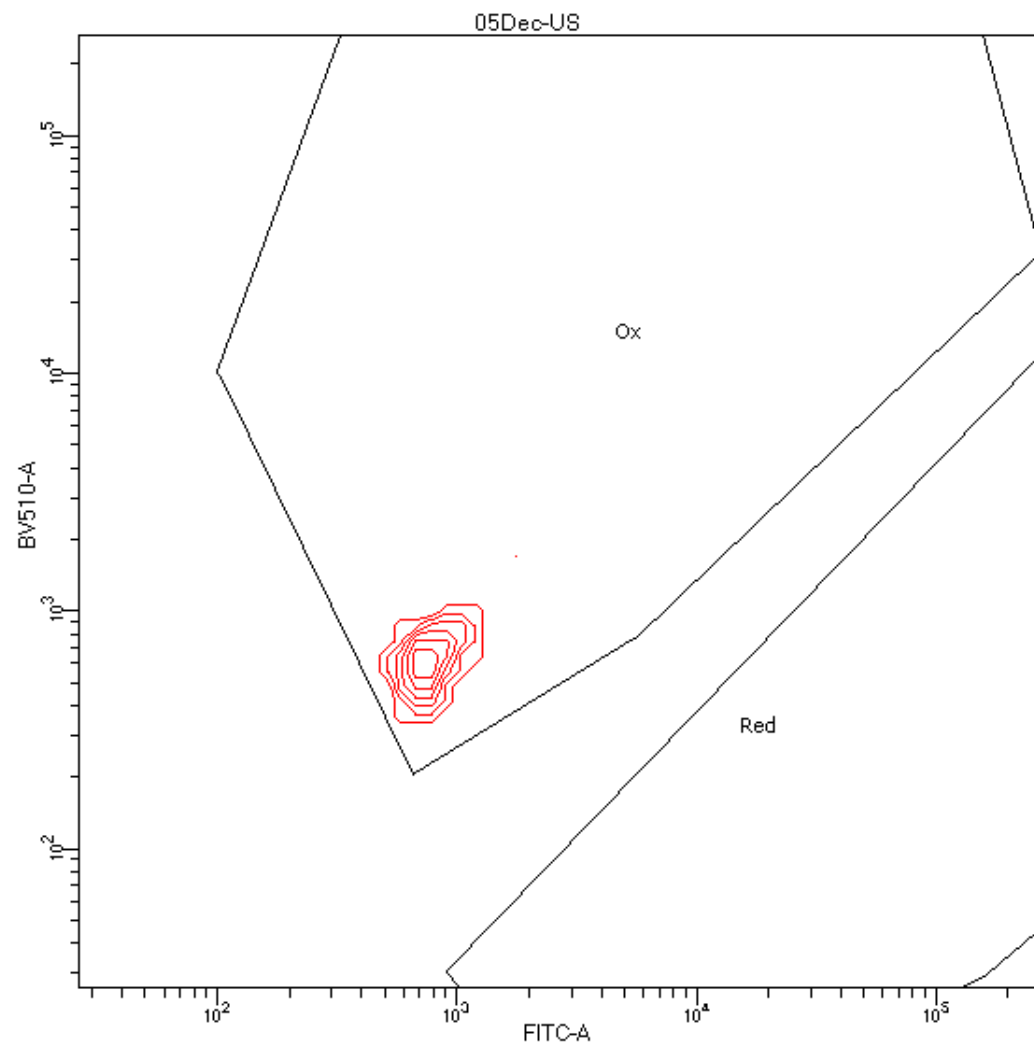

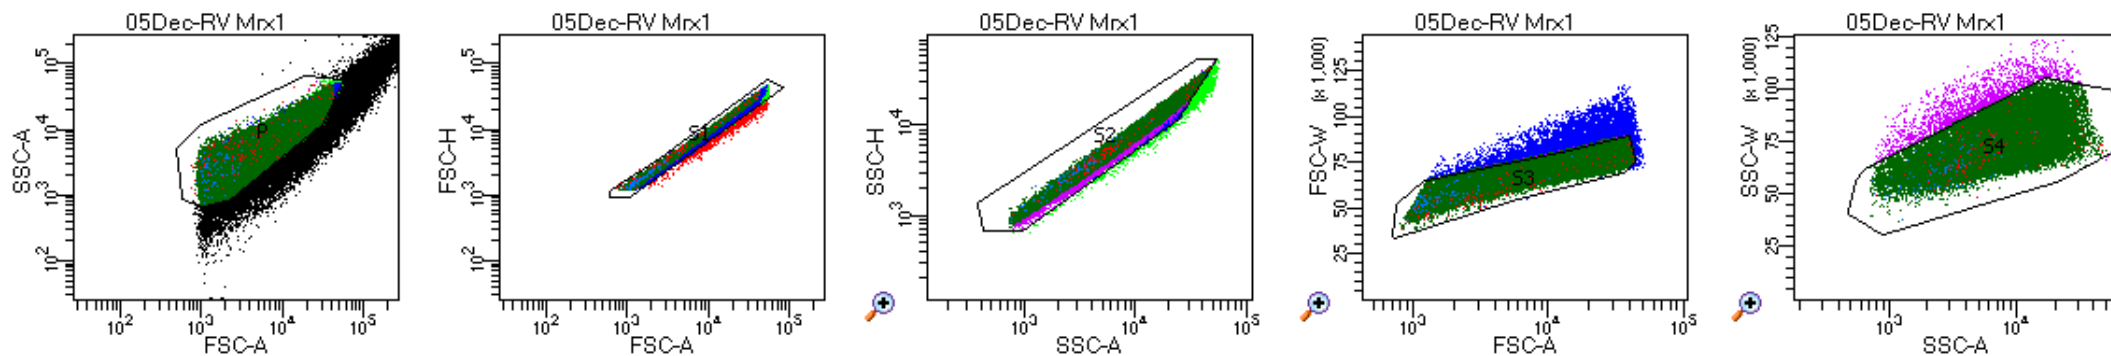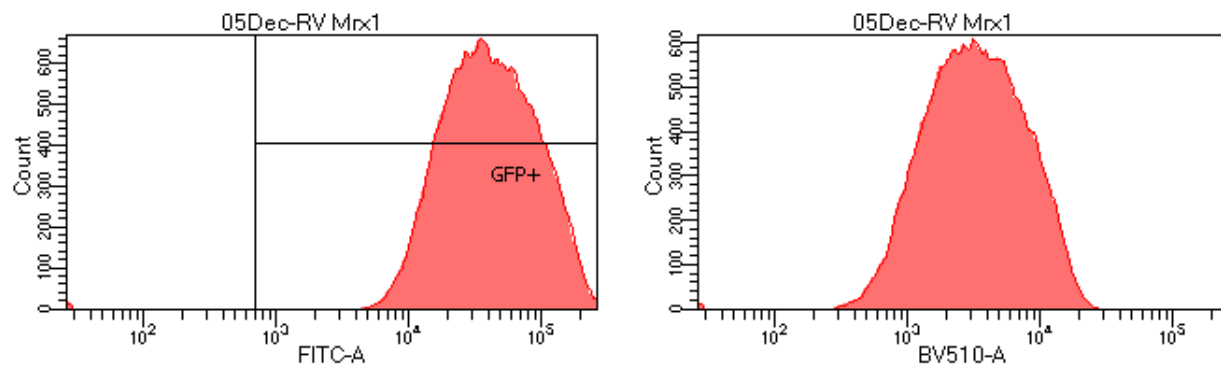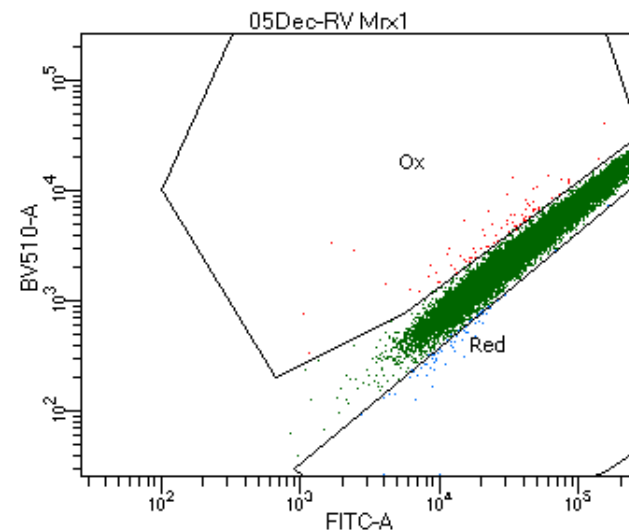

Tube: RV Mx1

| Population | #Events | %Parent | %Total |
|------------|---------|---------|--------|
| All Events | 73,400  | ####    | 100.0  |
| P          | 50,000  | 68.1    | 68.1   |
| S1         | 48,999  | 98.0    | 66.8   |
| S2         | 47,520  | 97.0    | 64.7   |
| S3         | 41,892  | 88.2    | 57.1   |
| S4         | 40,244  | 96.1    | 54.8   |
| GFP+       | 40,169  | 99.8    | 54.7   |
| Ox         | 99      | 0.2     | 0.1    |
| Red        | 80      | 0.2     | 0.1    |

|                  |                                |  |  |  |  |
|------------------|--------------------------------|--|--|--|--|
| Experiment Name: | 05EDec2016 Bac sorting         |  |  |  |  |
| Specimen Name:   | 05Dec                          |  |  |  |  |
| Tube Name:       | RV Mrx1                        |  |  |  |  |
| Record Date:     | Dec 5, 2016 4:27:38 PM         |  |  |  |  |
| \$OP:            | Administrator                  |  |  |  |  |
| GUID:            | 813183c7-53b3-4ab5-a621-30b... |  |  |  |  |

  

| Population                                                                                 | #Events | %Parent | FITC-A<br>Median | BV510-A<br>Median |
|--------------------------------------------------------------------------------------------|---------|---------|------------------|-------------------|
|  S4   | 40,244  | 96.1    | 38,973           | 3,103             |
|  GFP+ | 40,169  | 99.8    | 39,042           | 3,109             |
|  Ox   | 99      | 0.2     | 34,773           | 5,305             |
|  Red  | 80      | 0.2     | 11,255           | 351               |

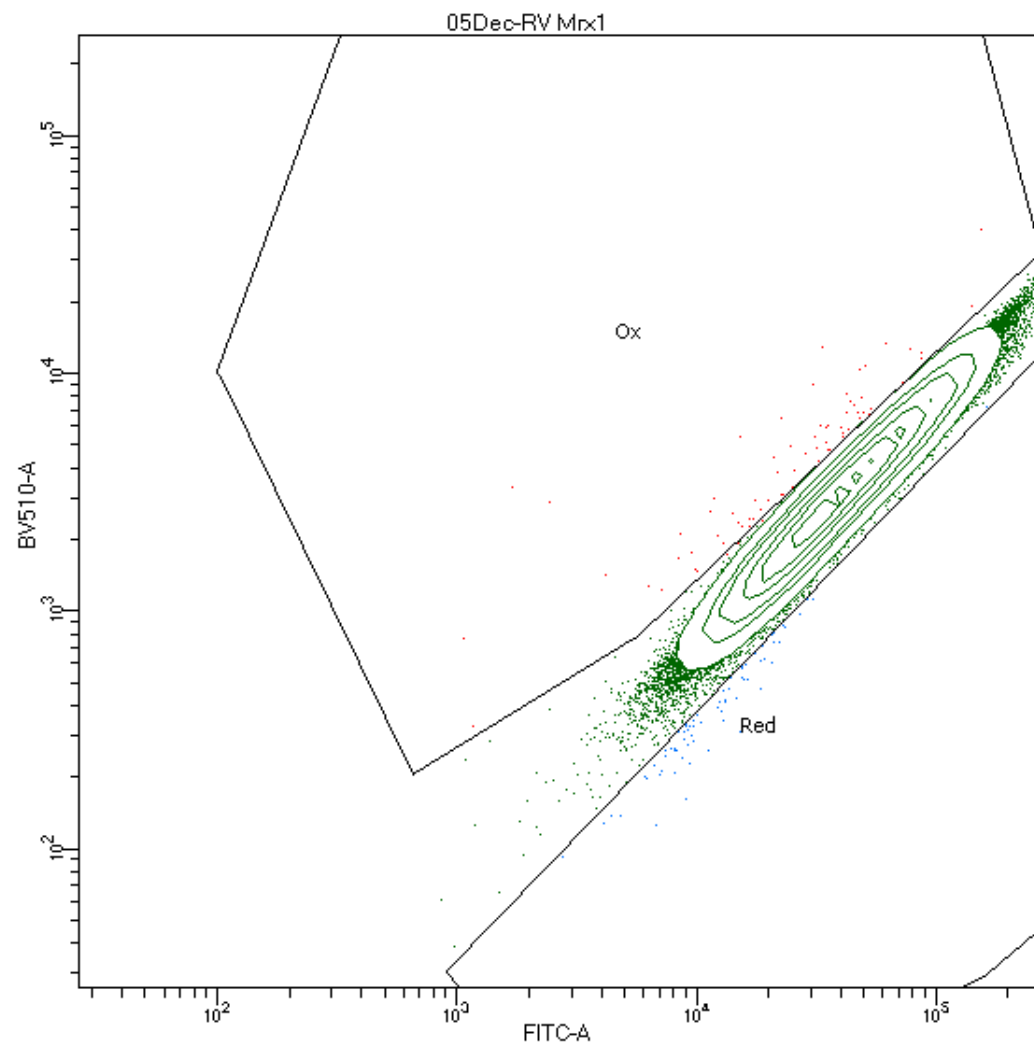

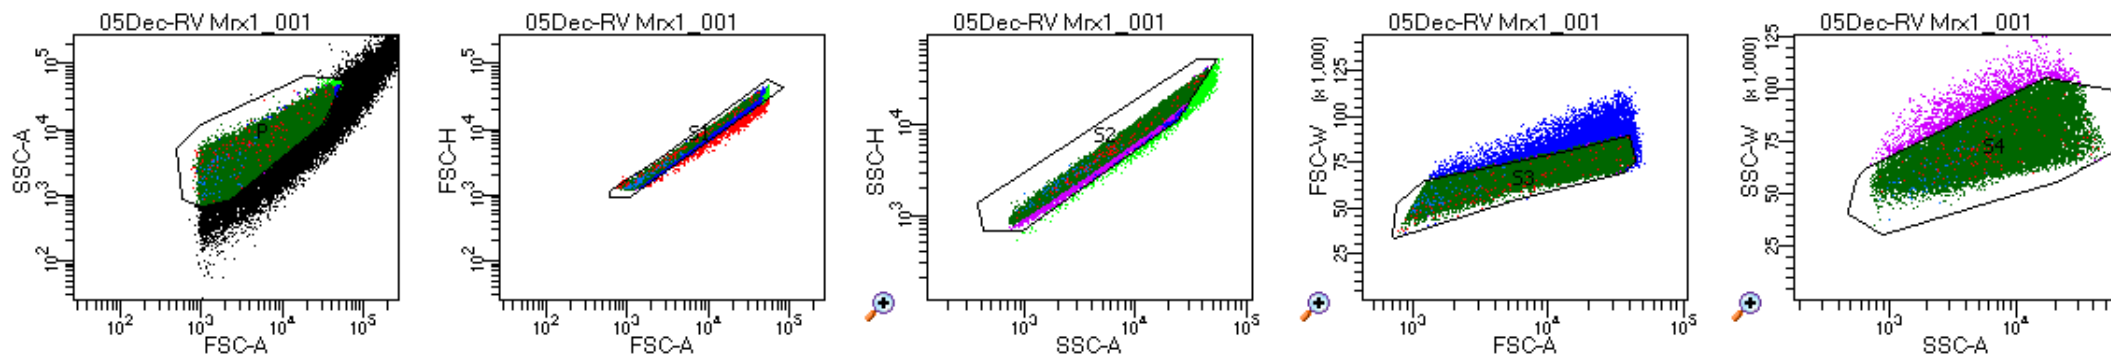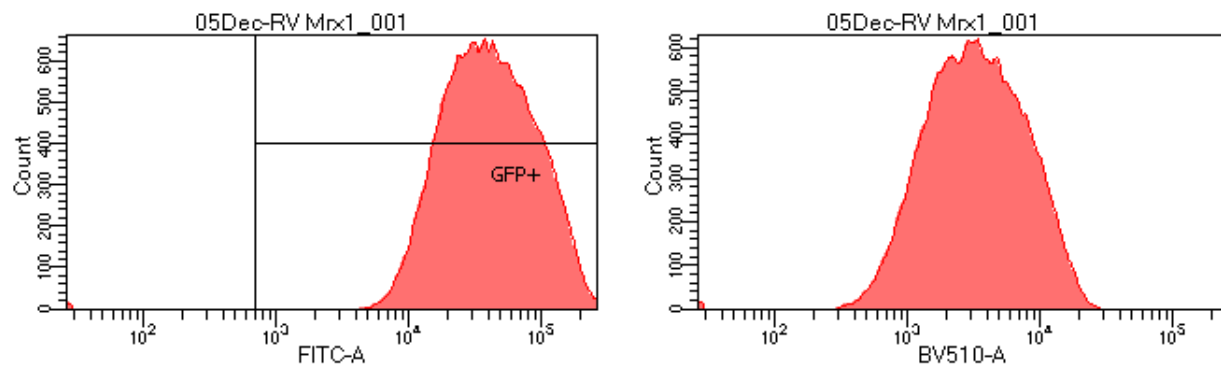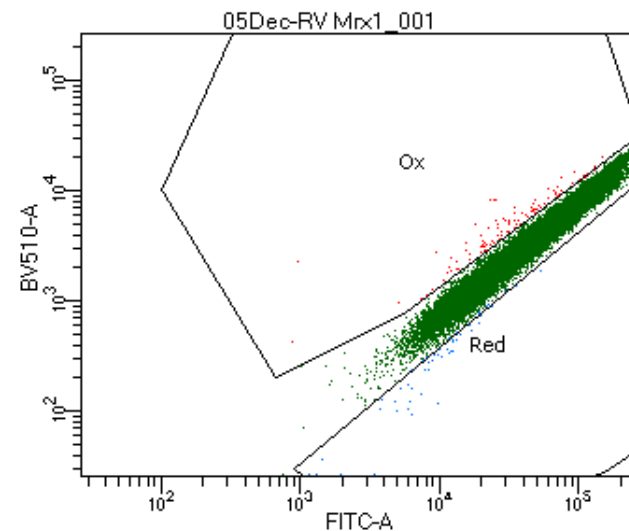

| Population | #Events | %Parent | %Total |
|------------|---------|---------|--------|
| All Events | 72,527  | ####    | 100.0  |
| P          | 50,000  | 68.9    | 68.9   |
| S1         | 48,928  | 97.9    | 67.5   |
| S2         | 47,472  | 97.0    | 65.5   |
| S3         | 41,835  | 88.1    | 57.7   |
| S4         | 40,159  | 96.0    | 55.4   |
| GFP+       | 40,090  | 99.8    | 55.3   |
| Ox         | 111     | 0.3     | 0.2    |
| Red        | 65      | 0.2     | 0.1    |

|                  |                                 |  |  |  |
|------------------|---------------------------------|--|--|--|
| Experiment Name: | 05EDec2016 Bac sorting          |  |  |  |
| Specimen Name:   | 05Dec                           |  |  |  |
| Tube Name:       | RV Mrx1_001                     |  |  |  |
| Record Date:     | Dec 5, 2016 4:28:13 PM          |  |  |  |
| SOP:             | Administrator                   |  |  |  |
| GUID:            | 48e3b8f3-3235-4b3c-a476-55fc... |  |  |  |

  

| Population                                                                                 | #Events | %Parent | FITC-A<br>Median | BV510-A<br>Median |
|--------------------------------------------------------------------------------------------|---------|---------|------------------|-------------------|
|  S4   | 40,159  | 96.0    | 38,482           | 3,119             |
|  GFP+ | 40,090  | 99.8    | 38,575           | 3,126             |
|  Ox   | 111     | 0.3     | 34,512           | 5,441             |
|  Red  | 65      | 0.2     | 11,200           | 369               |

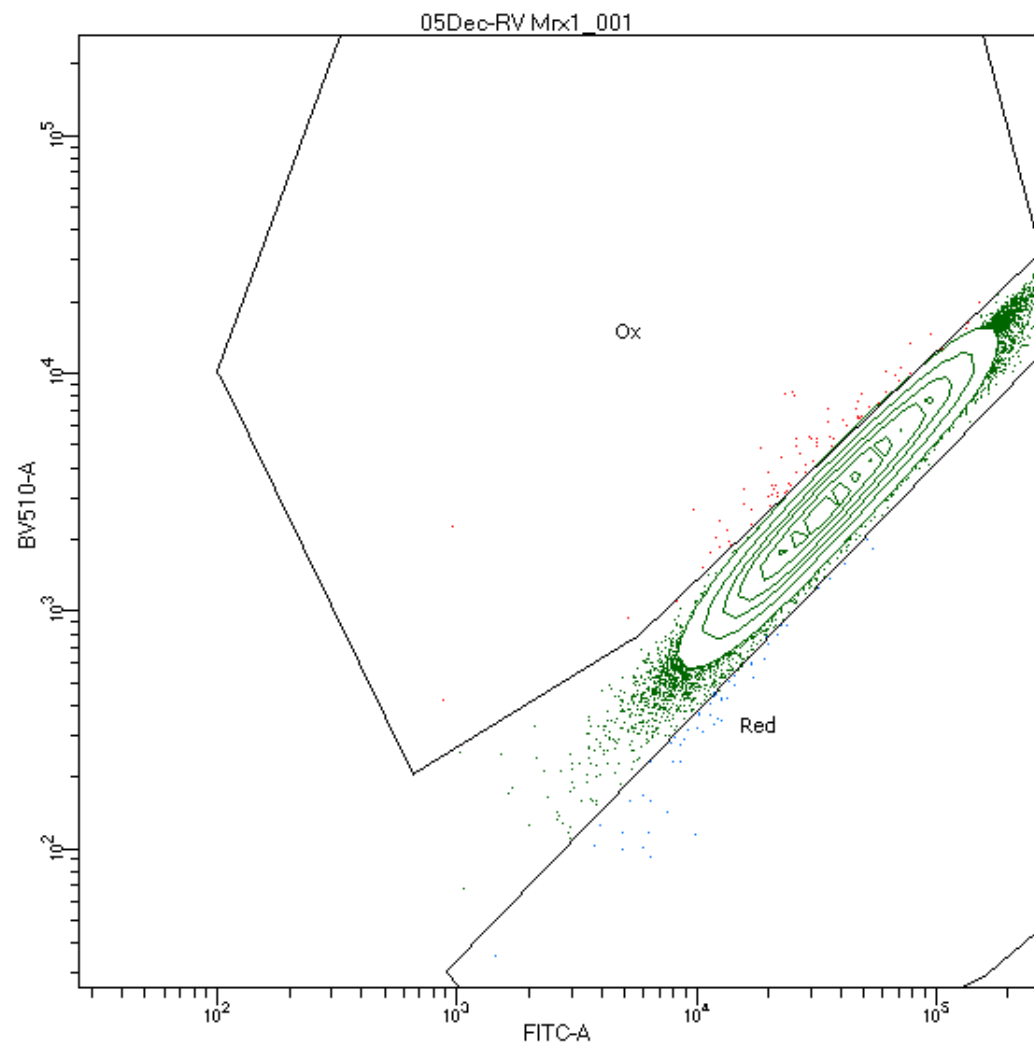

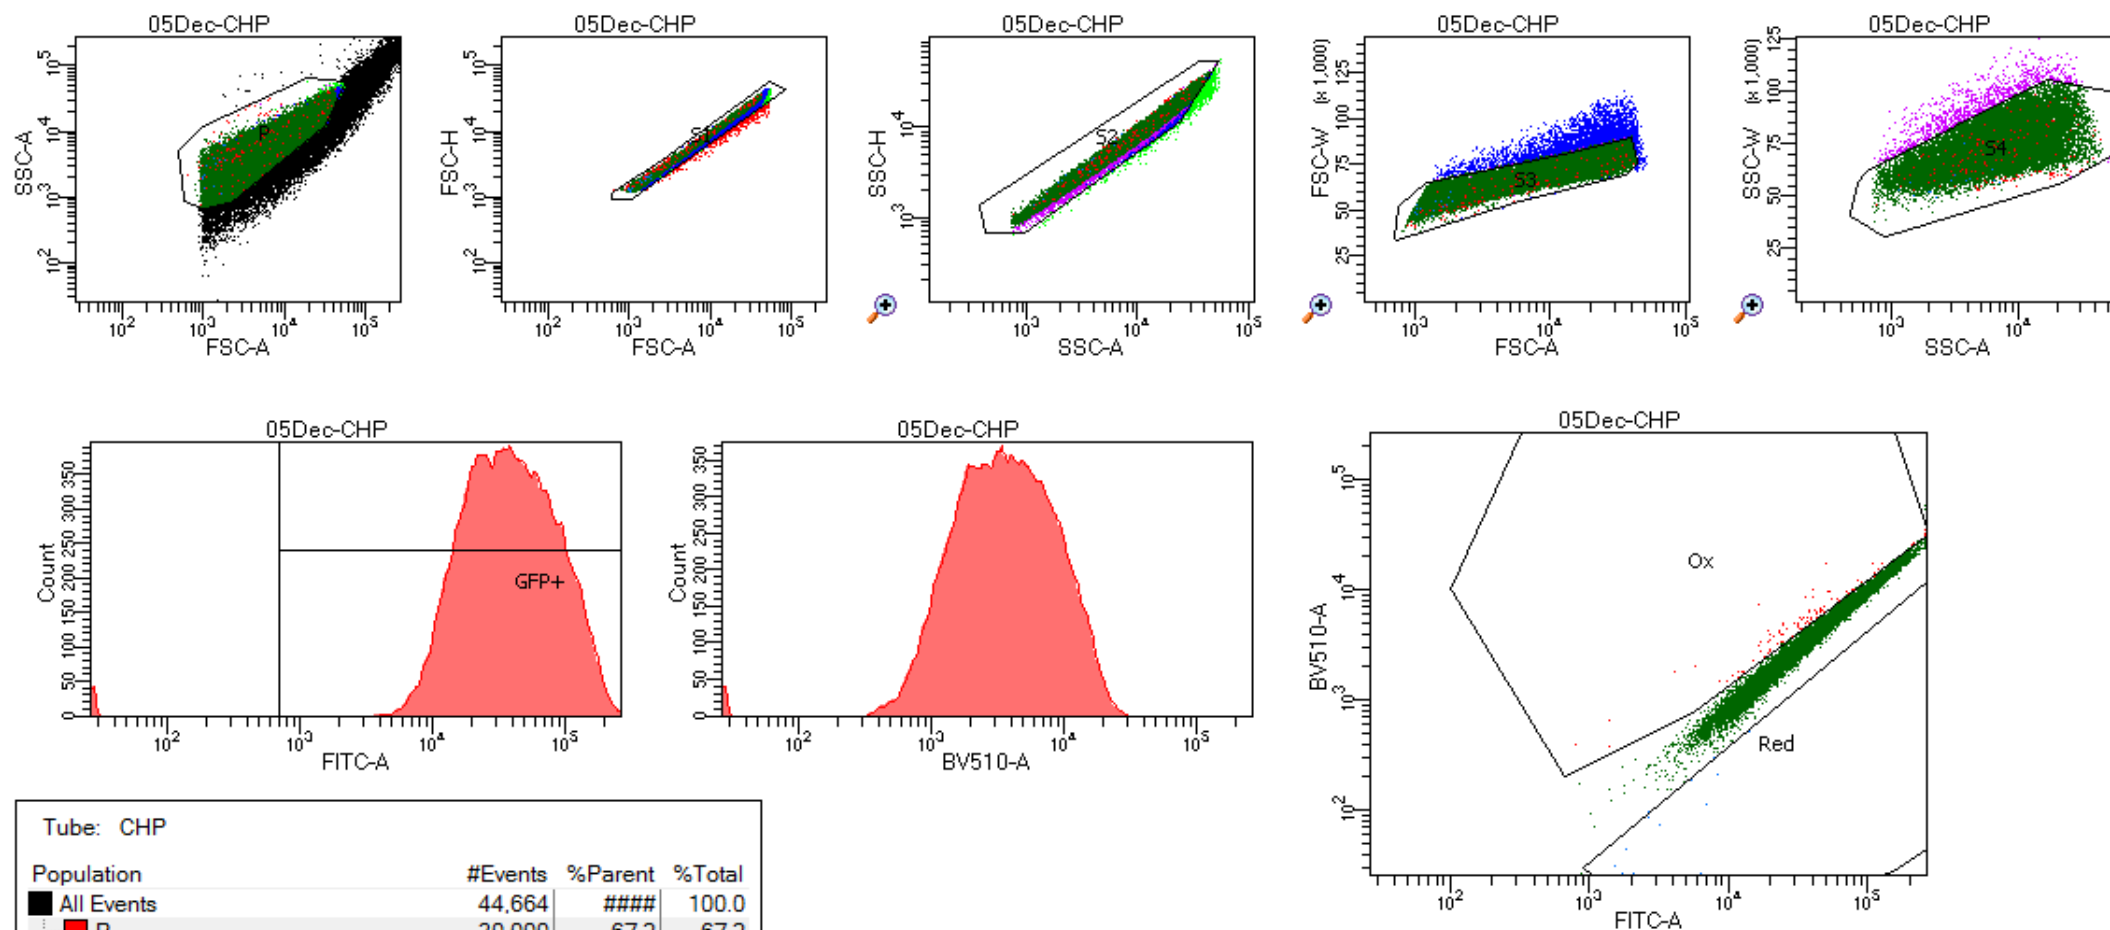

Tube: CHP

| Population | #Events | %Parent | %Total |
|------------|---------|---------|--------|
| All Events | 44,664  | ####    | 100.0  |
| P          | 30,000  | 67.2    | 67.2   |
| S1         | 29,535  | 98.4    | 66.1   |
| S2         | 28,675  | 97.1    | 64.2   |
| S3         | 25,809  | 90.0    | 57.8   |
| S4         | 24,892  | 96.4    | 55.7   |
| GFP+       | 24,758  | 99.5    | 55.4   |
| Ox         | 114     | 0.5     | 0.3    |
| Red        | 14      | 0.1     | 0.0    |

|                  |                                |  |  |  |
|------------------|--------------------------------|--|--|--|
| Experiment Name: | 05EDec2016 Bac sorting         |  |  |  |
| Specimen Name:   | 05Dec                          |  |  |  |
| Tube Name:       | CHP                            |  |  |  |
| Record Date:     | Dec 5, 2016 2:16:12 PM         |  |  |  |
| SOP:             | Administrator                  |  |  |  |
| GUID:            | 03ce0e3c-2747-4f85-9e42-729... |  |  |  |

  

| Population                                                                                 | #Events | %Parent | FITC-A<br>Median | BV510-A<br>Median |
|--------------------------------------------------------------------------------------------|---------|---------|------------------|-------------------|
|  S4   | 24,892  | 96.4    | 36,316           | 3,412             |
|  GFP+ | 24,758  | 99.5    | 36,574           | 3,434             |
|  Ox   | 114     | 0.5     | 37,371           | 5,578             |
|  Red  | 14      | 0.1     | 2,906            | 81                |



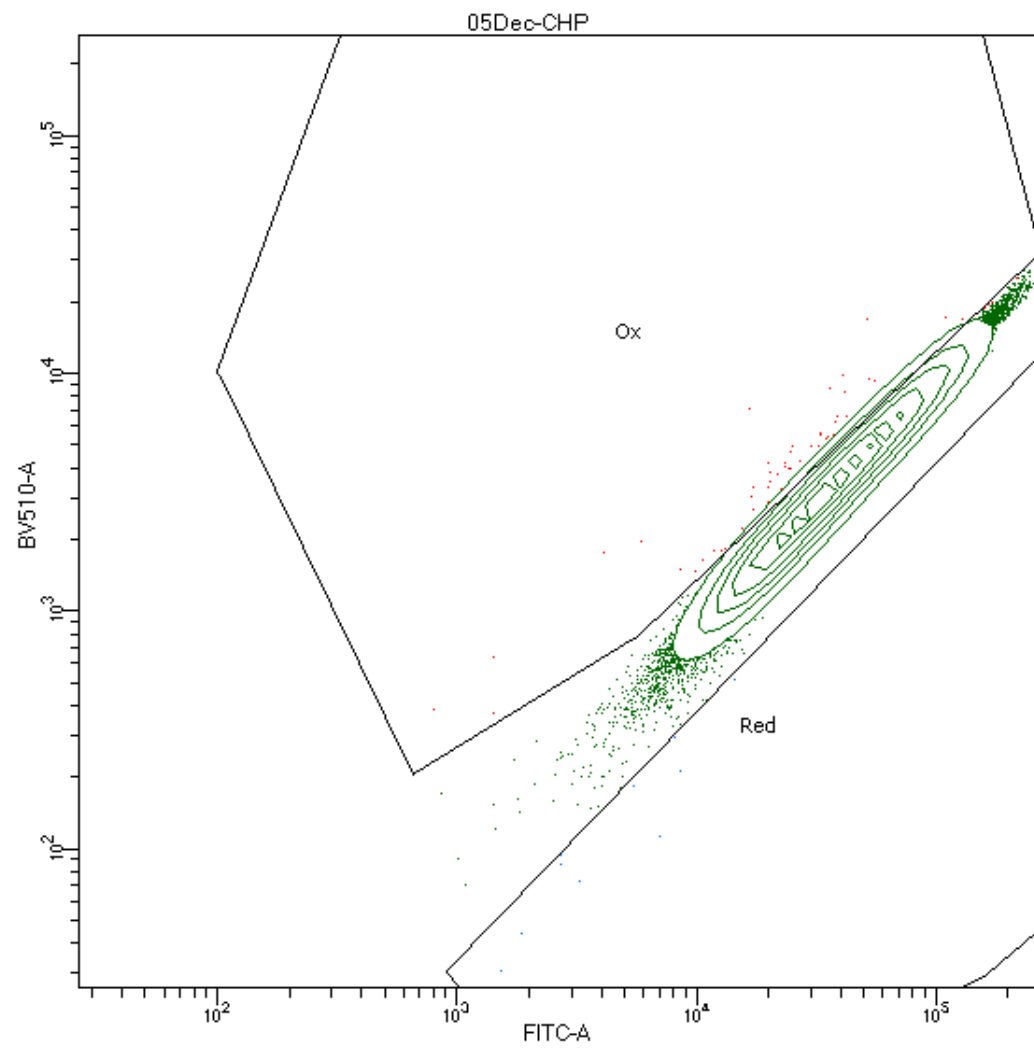

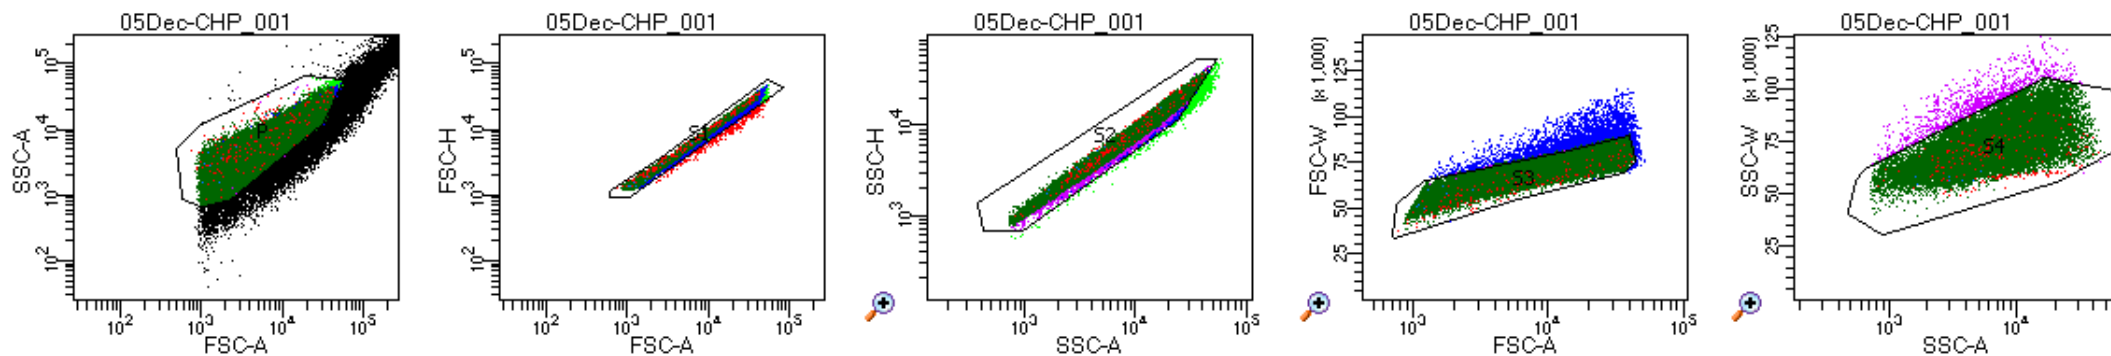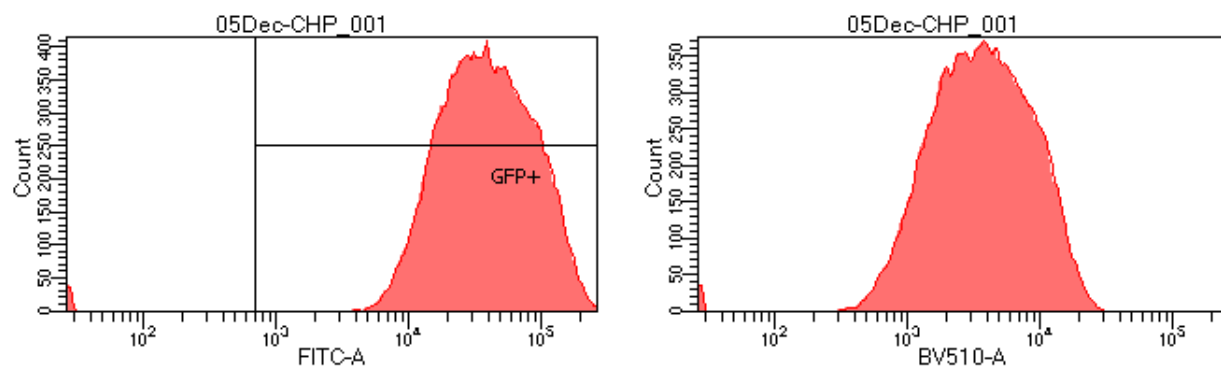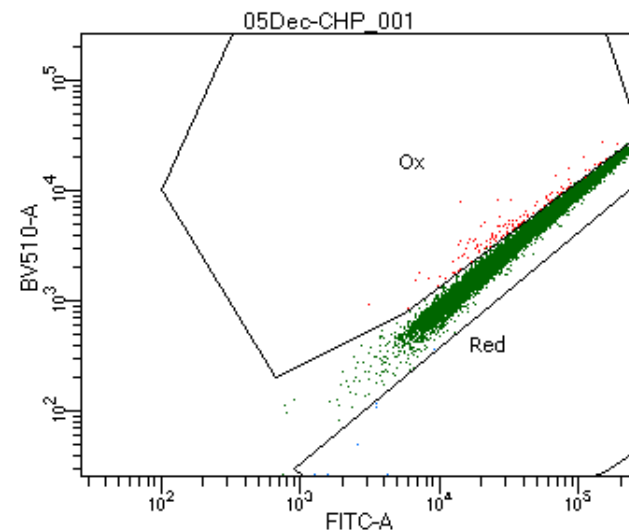

Tube: CHP\_001

| Population | #Events | %Parent | %Total |
|------------|---------|---------|--------|
| All Events | 44,871  | ####    | 100.0  |
| P          | 30,000  | 66.9    | 66.9   |
| S1         | 29,488  | 98.3    | 65.7   |
| S2         | 28,652  | 97.2    | 63.9   |
| S3         | 25,772  | 89.9    | 57.4   |
| S4         | 24,840  | 96.4    | 55.4   |
| GFP+       | 24,720  | 99.5    | 55.1   |
| Ox         | 153     | 0.6     | 0.3    |
| Red        | 8       | 0.0     | 0.0    |

|                  |                                |  |  |  |
|------------------|--------------------------------|--|--|--|
| Experiment Name: | 05EDec2016 Bac sorting         |  |  |  |
| Specimen Name:   | 05Dec                          |  |  |  |
| Tube Name:       | CHP_001                        |  |  |  |
| Record Date:     | Dec 5, 2016 2:16:48 PM         |  |  |  |
| \$OP:            | Administrator                  |  |  |  |
| GUID:            | 3f155b14-e8e4-4475-b6e8-e65... |  |  |  |

  

| Population                                                                                 | #Events | %Parent | FITC-A<br>Median | BV510-A<br>Median |
|--------------------------------------------------------------------------------------------|---------|---------|------------------|-------------------|
|  S4   | 24,840  | 96.4    | 36,959           | 3,501             |
|  GFP+ | 24,720  | 99.5    | 37,131           | 3,521             |
|  Ox   | 153     | 0.6     | 33,921           | 5,178             |
|  Red  | 8       | 0.0     | 3,440            | 80                |

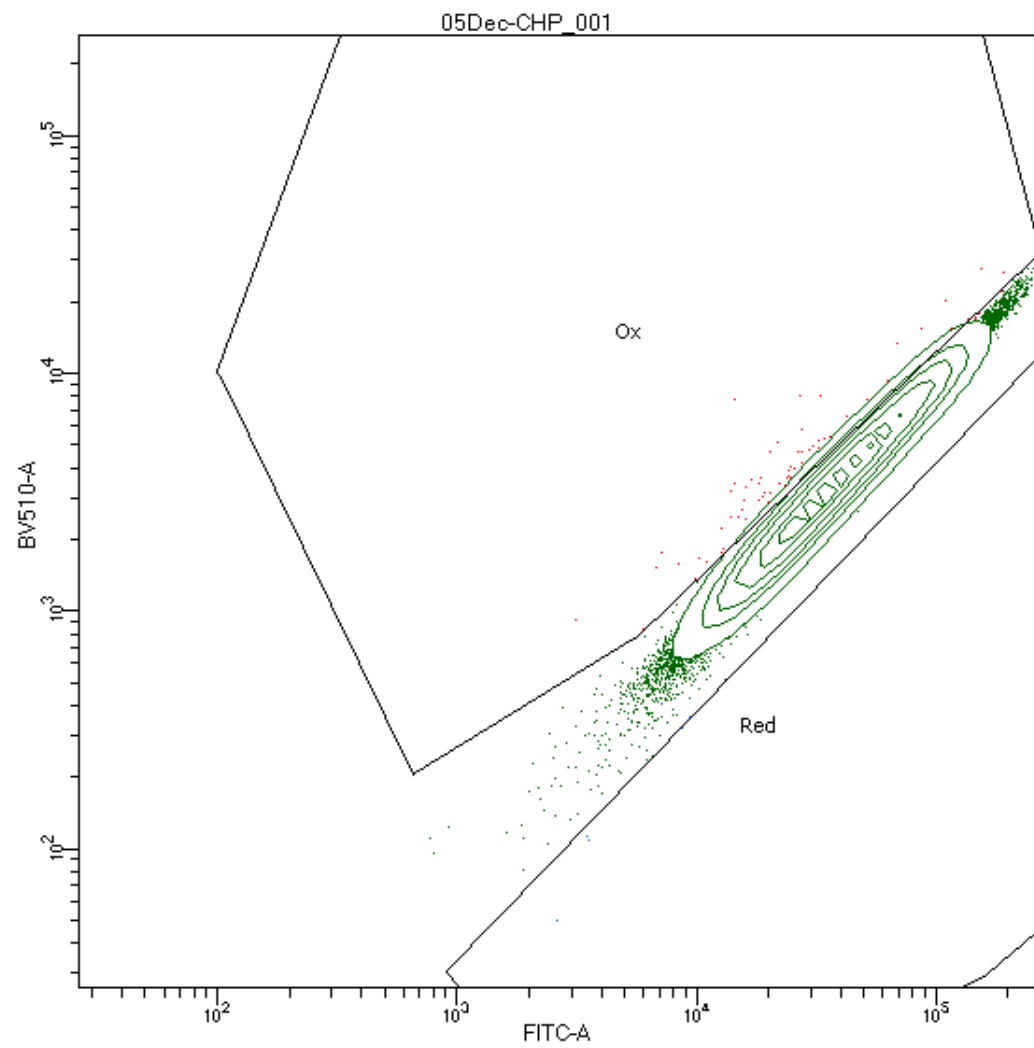

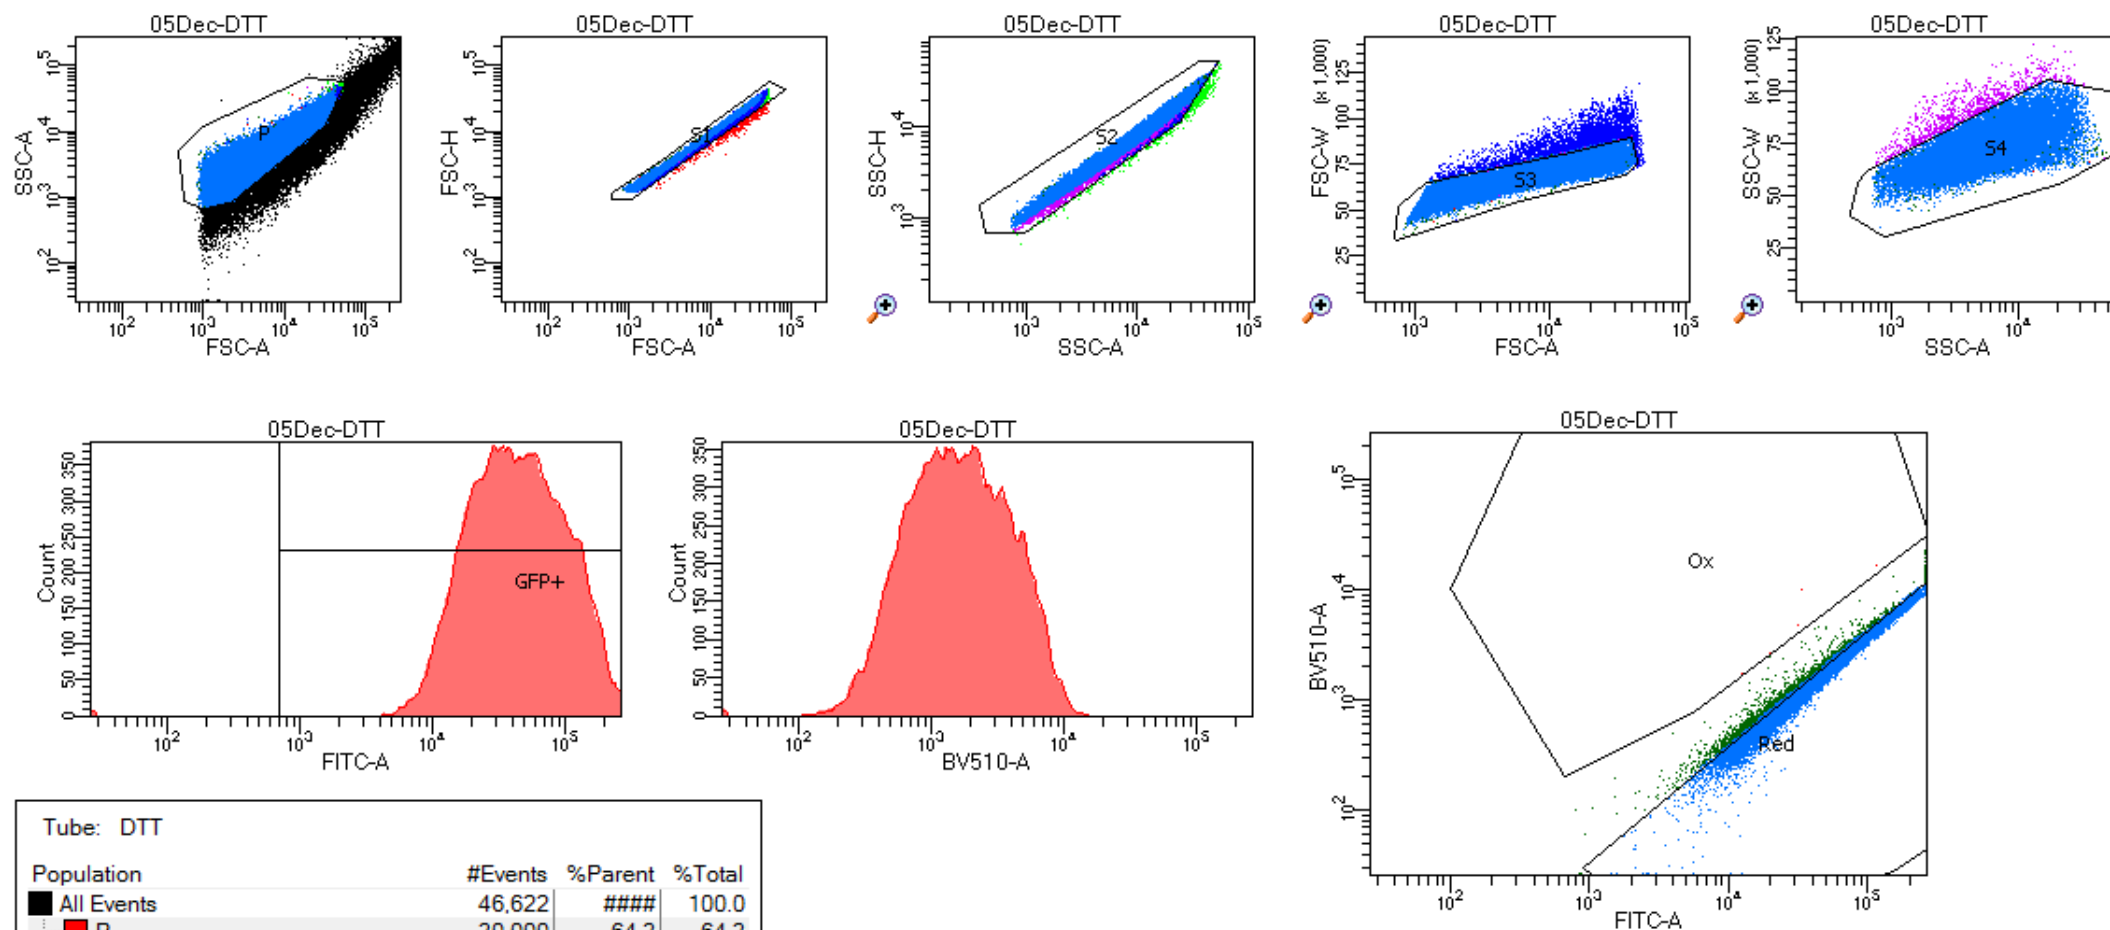

| Population | #Events | %Parent | %Total |
|------------|---------|---------|--------|
| All Events | 46,622  | ####    | 100.0  |
| P          | 30,000  | 64.3    | 64.3   |
| S1         | 29,589  | 98.6    | 63.5   |
| S2         | 29,061  | 98.2    | 62.3   |
| S3         | 25,739  | 88.6    | 55.2   |
| S4         | 24,886  | 96.7    | 53.4   |
| GFP+       | 24,840  | 99.8    | 53.3   |
| Ox         | 5       | 0.0     | 0.0    |
| Red        | 22,531  | 90.7    | 48.3   |

|                  |                                 |  |  |  |
|------------------|---------------------------------|--|--|--|
| Experiment Name: | 05EDec2016 Bac sorting          |  |  |  |
| Specimen Name:   | 05Dec                           |  |  |  |
| Tube Name:       | DTT                             |  |  |  |
| Record Date:     | Dec 5, 2016 2:17:32 PM          |  |  |  |
| \$OP:            | Administrator                   |  |  |  |
| GUID:            | 12713f7e-9ec3-4721-b70f-8612... |  |  |  |

  

| Population                                                                                 | #Events | %Parent | FITC-A<br>Median | BV510-A<br>Median |
|--------------------------------------------------------------------------------------------|---------|---------|------------------|-------------------|
|  S4   | 24,886  | 96.7    | 41,675           | 1,517             |
|  GFP+ | 24,840  | 99.8    | 41,751           | 1,522             |
|  Ox   | 5       | 0.0     | 31,330           | 4,762             |
|  Red  | 22,531  | 90.7    | 44,170           | 1,584             |

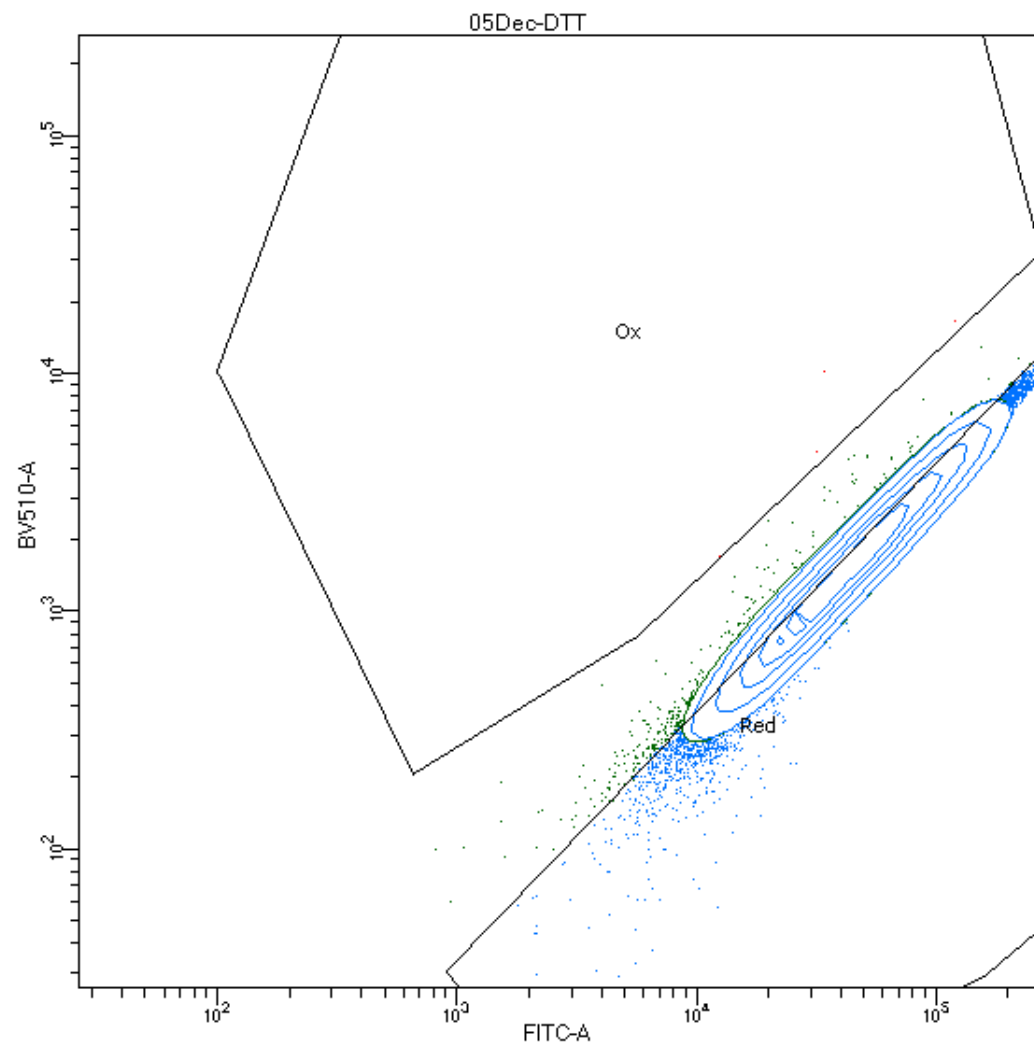

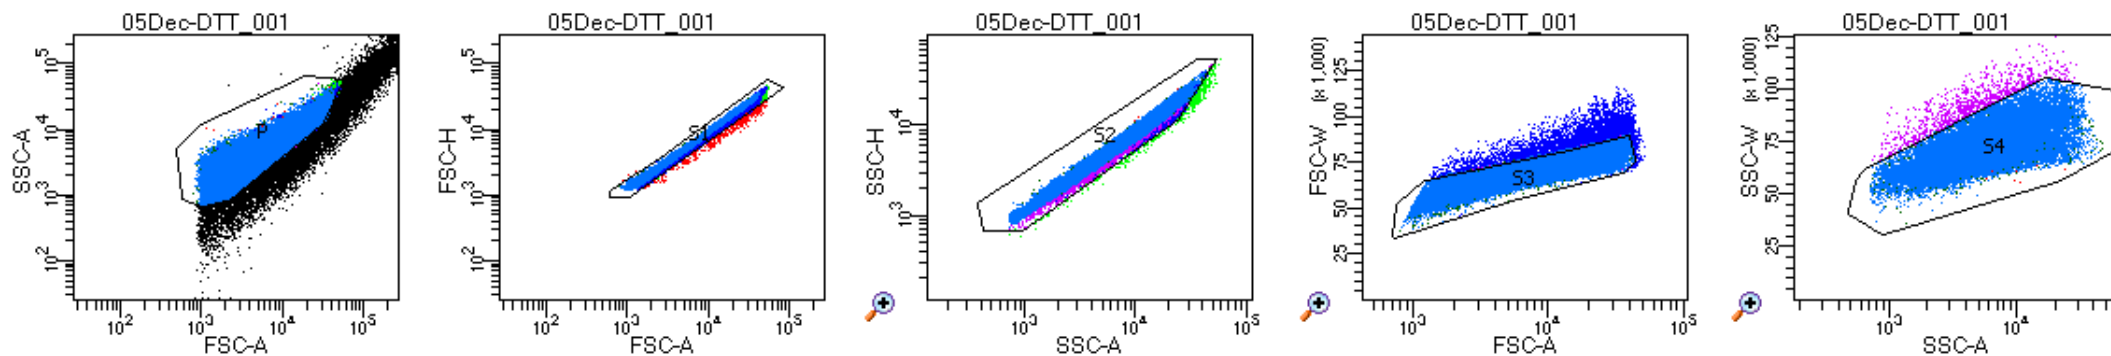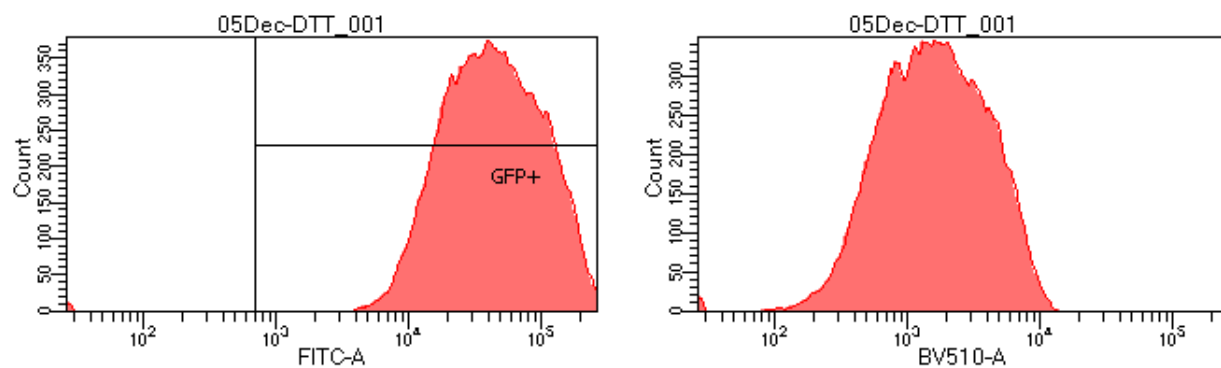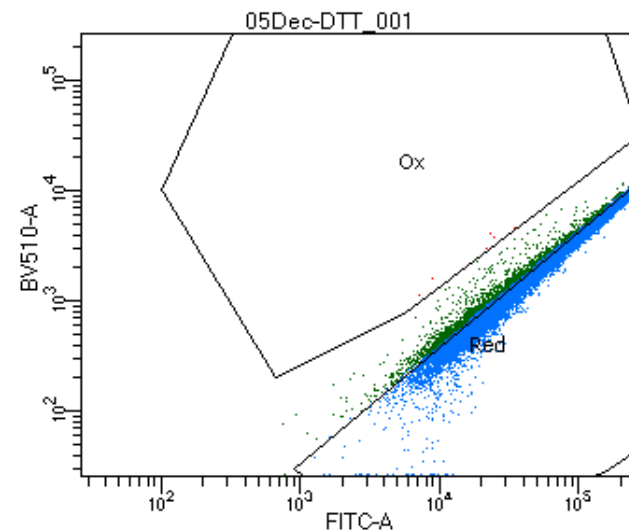

Tube: DTT\_001

| Population | #Events | %Parent | %Total |
|------------|---------|---------|--------|
| All Events | 45,911  | ####    | 100.0  |
| P          | 30,086  | 65.5    | 65.5   |
| S1         | 29,598  | 98.4    | 64.5   |
| S2         | 29,085  | 98.3    | 63.4   |
| S3         | 25,567  | 87.9    | 55.7   |
| S4         | 24,674  | 96.5    | 53.7   |
| GFP+       | 24,623  | 99.8    | 53.6   |
| Ox         | 6       | 0.0     | 0.0    |
| Red        | 21,701  | 88.1    | 47.3   |

|                  |                                |  |  |  |
|------------------|--------------------------------|--|--|--|
| Experiment Name: | 05EDec2016 Bac sorting         |  |  |  |
| Specimen Name:   | 05Dec                          |  |  |  |
| Tube Name:       | DTT_001                        |  |  |  |
| Record Date:     | Dec 5, 2016 2:18:07 PM         |  |  |  |
| \$OP:            | Administrator                  |  |  |  |
| GUID:            | c147e877-cb3d-44e6-bc19-948... |  |  |  |

  

| Population                                                                                 | #Events | %Parent | FITC-A<br>Median | BV510-A<br>Median |
|--------------------------------------------------------------------------------------------|---------|---------|------------------|-------------------|
|  S4   | 24,674  | 96.5    | 41,314           | 1,521             |
|  GFP+ | 24,623  | 99.8    | 41,416           | 1,524             |
|  Ox   | 6       | 0.0     | 22,280           | 3,358             |
|  Red  | 21,701  | 88.1    | 43,937           | 1,572             |

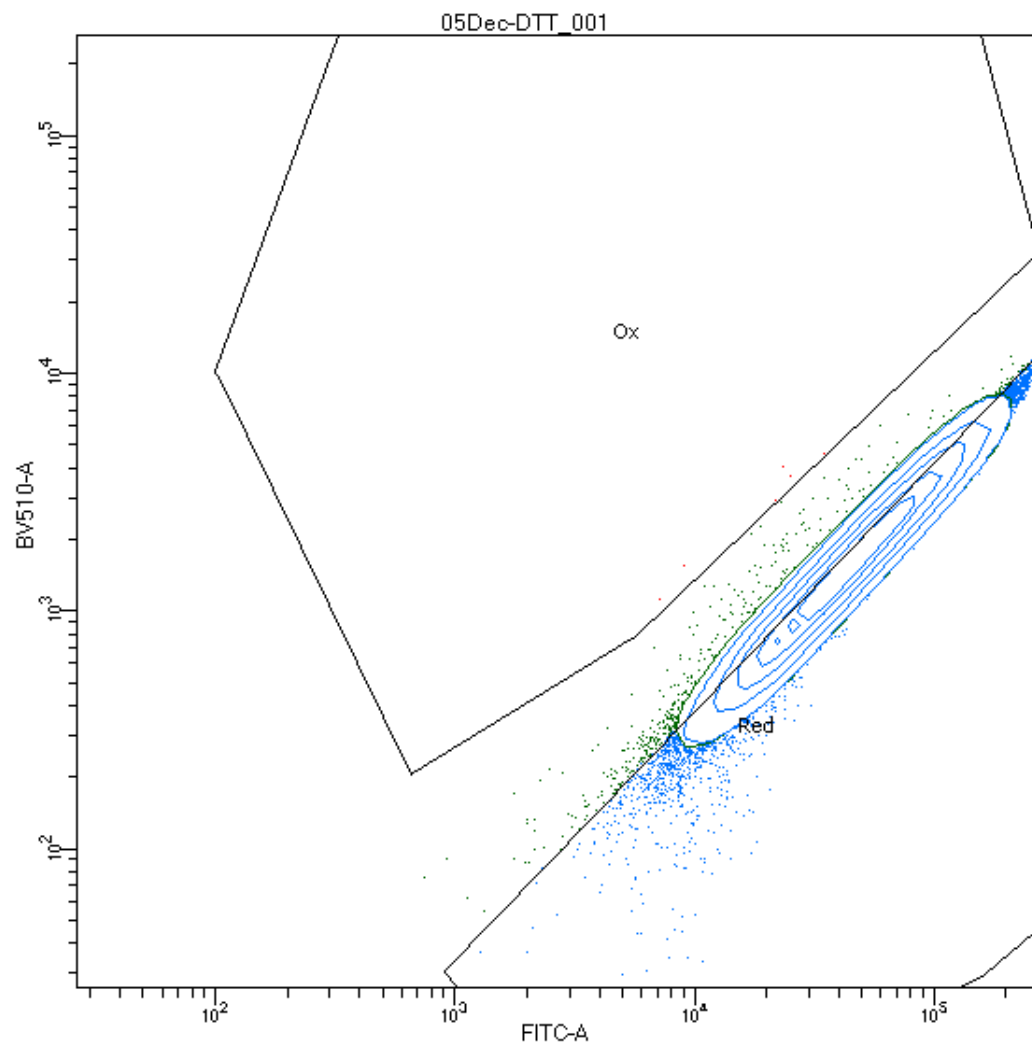

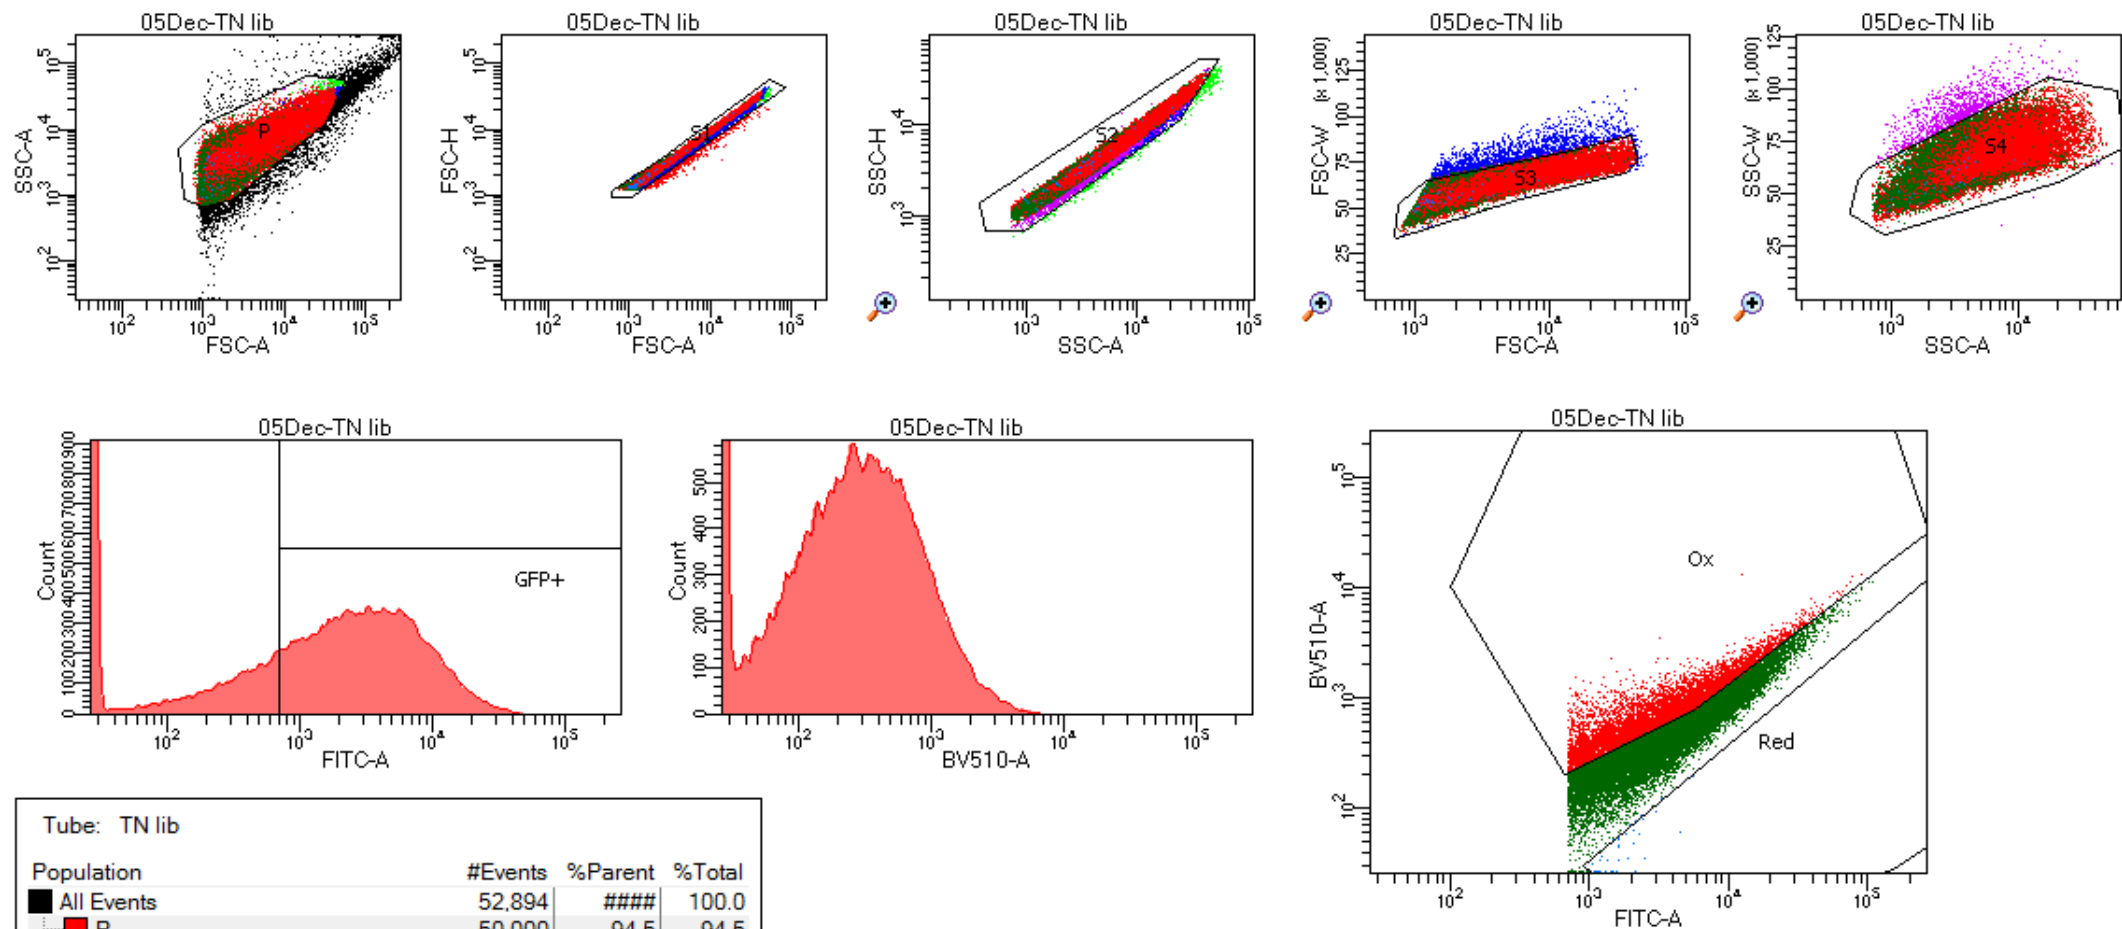

Tube: TN lib

| Population | #Events | %Parent | %Total |
|------------|---------|---------|--------|
| All Events | 52,894  | ####    | 100.0  |
| P          | 50,000  | 94.5    | 94.5   |
| S1         | 49,580  | 99.2    | 93.7   |
| S2         | 49,214  | 99.3    | 93.0   |
| S3         | 47,615  | 96.8    | 90.0   |
| S4         | 46,683  | 98.0    | 88.3   |
| GFP+       | 26,297  | 56.3    | 49.7   |
| Ox         | 6,602   | 25.1    | 12.5   |
| Red        | 38      | 0.1     | 0.1    |

Experiment Name: 05EDec2016 Bac sorting  
 Specimen Name: 05Dec  
 Tube Name: TN lib  
 Record Date: Dec 5, 2016 2:18:55 PM  
 SOP: Administrator  
 GUID: 456fb14e-329b-4373-9f97-dfd4...

| Population | #Events | %Parent | FITC-A<br>Median | BV510-A<br>Median |
|------------|---------|---------|------------------|-------------------|
| S4         | 46,683  | 98.0    | 1,070            | 250               |
| GFP+       | 26,297  | 56.3    | 3,347            | 471               |
| Ox         | 6,602   | 25.1    | 2,934            | 713               |
| Red        | 38      | 0.1     | 1,605            | 45                |



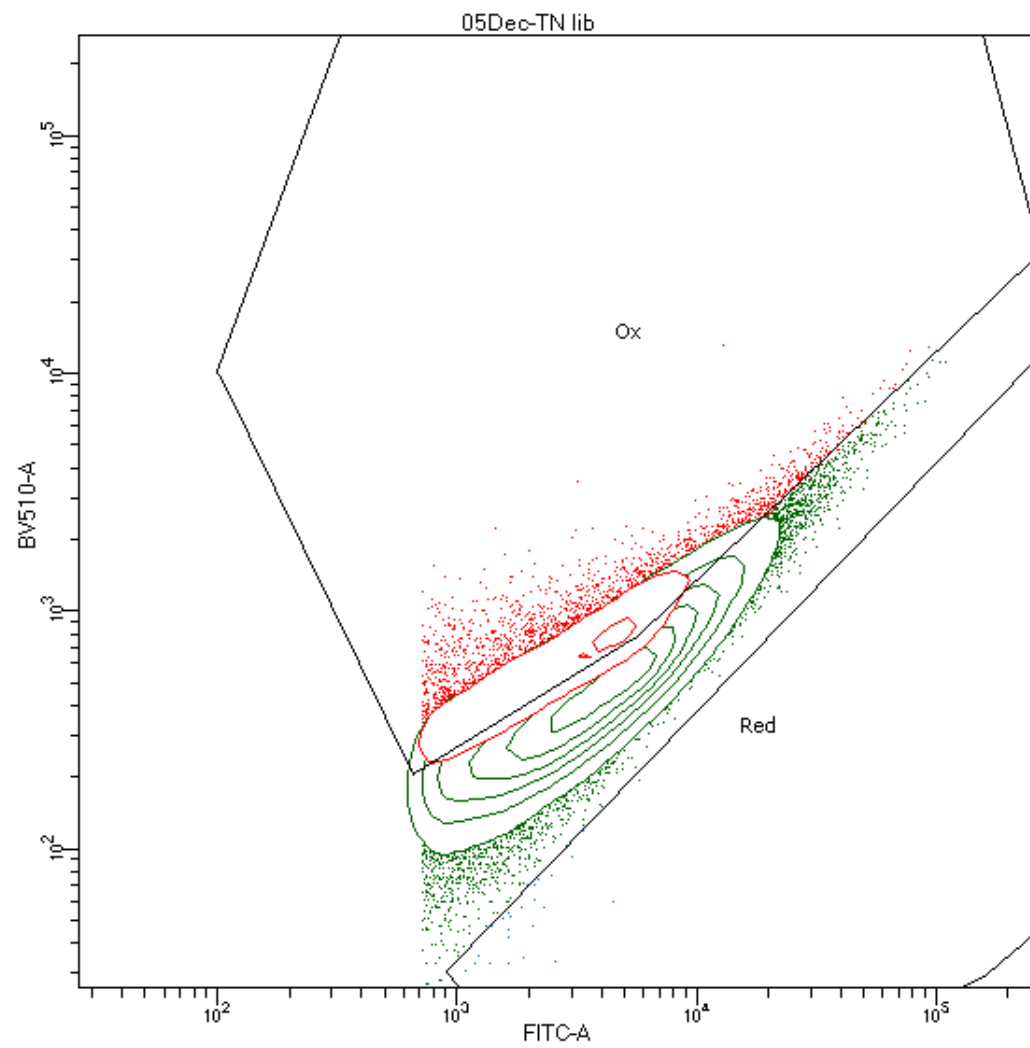

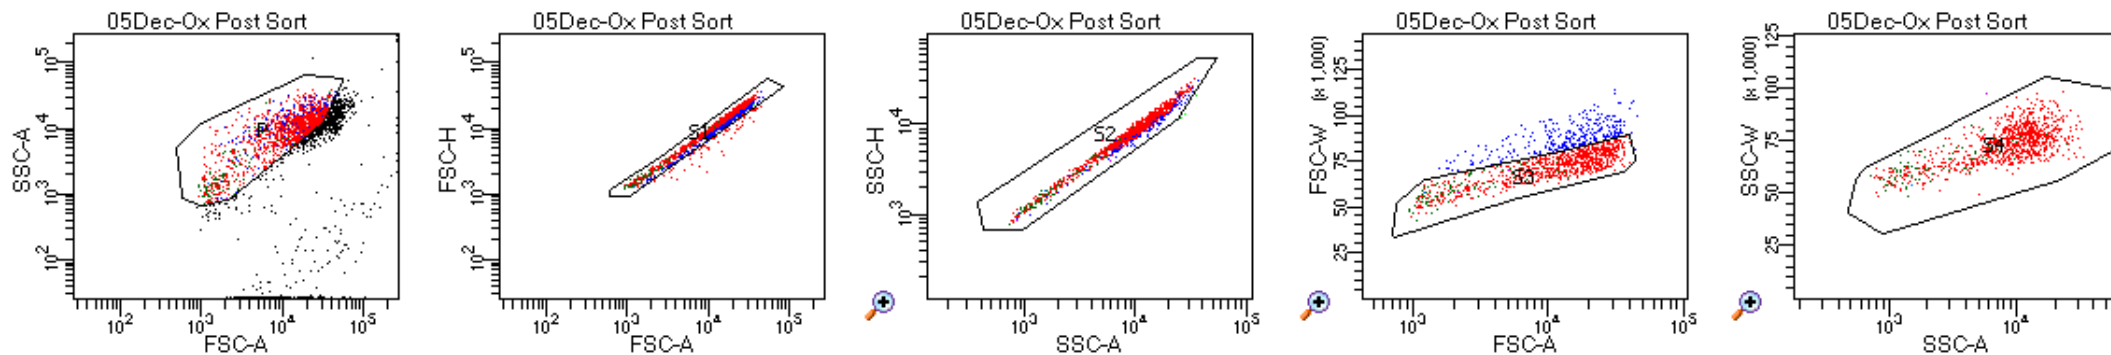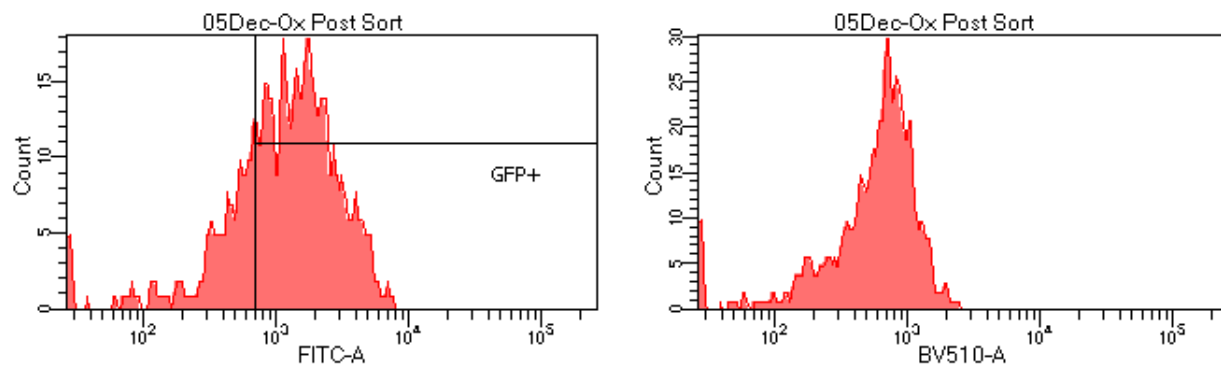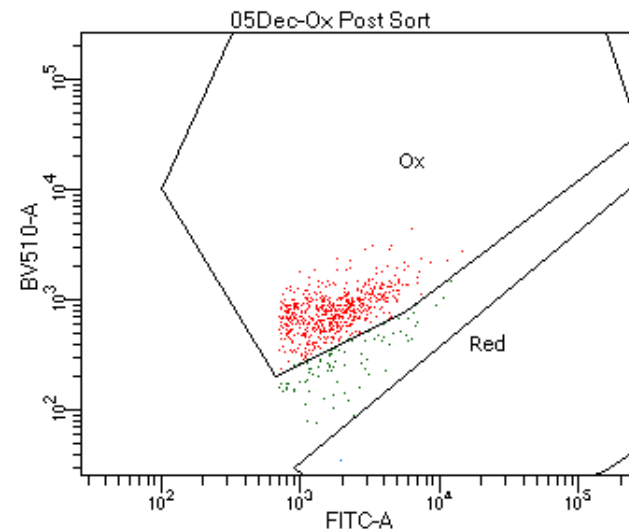

Tube: Ox Post Sort

| Population | #Events | %Parent | %Total |
|------------|---------|---------|--------|
| All Events | 2,228   | ####    | 100.0  |
| P          | 1,358   | 61.0    | 61.0   |
| S1         | 1,276   | 94.0    | 57.3   |
| S2         | 1,273   | 99.8    | 57.1   |
| S3         | 978     | 76.8    | 43.9   |
| S4         | 976     | 99.8    | 43.8   |
| GFP+       | 684     | 70.1    | 30.7   |
| Ox         | 593     | 86.7    | 26.6   |
| Red        | 1       | 0.1     | 0.0    |

|                  |                                |
|------------------|--------------------------------|
| Experiment Name: | 05EDec2016 Bac sorting         |
| Specimen Name:   | 05Dec                          |
| Tube Name:       | Ox Post Sort                   |
| Record Date:     | Dec 5, 2016 4:23:30 PM         |
| SOP:             | Administrator                  |
| GUID:            | 501515bc-0809-4310-97f5-109... |

  

| Population                                                                                 | #Events | %Parent | FITC-A<br>Median | BV510-A<br>Median |
|--------------------------------------------------------------------------------------------|---------|---------|------------------|-------------------|
|  S4   | 976     | 99.8    | 1,159            | 623               |
|  GFP+ | 684     | 70.1    | 1,663            | 741               |
|  Ox   | 593     | 86.7    | 1,636            | 794               |
|  Red  | 1       | 0.1     | 1,935            | 36                |

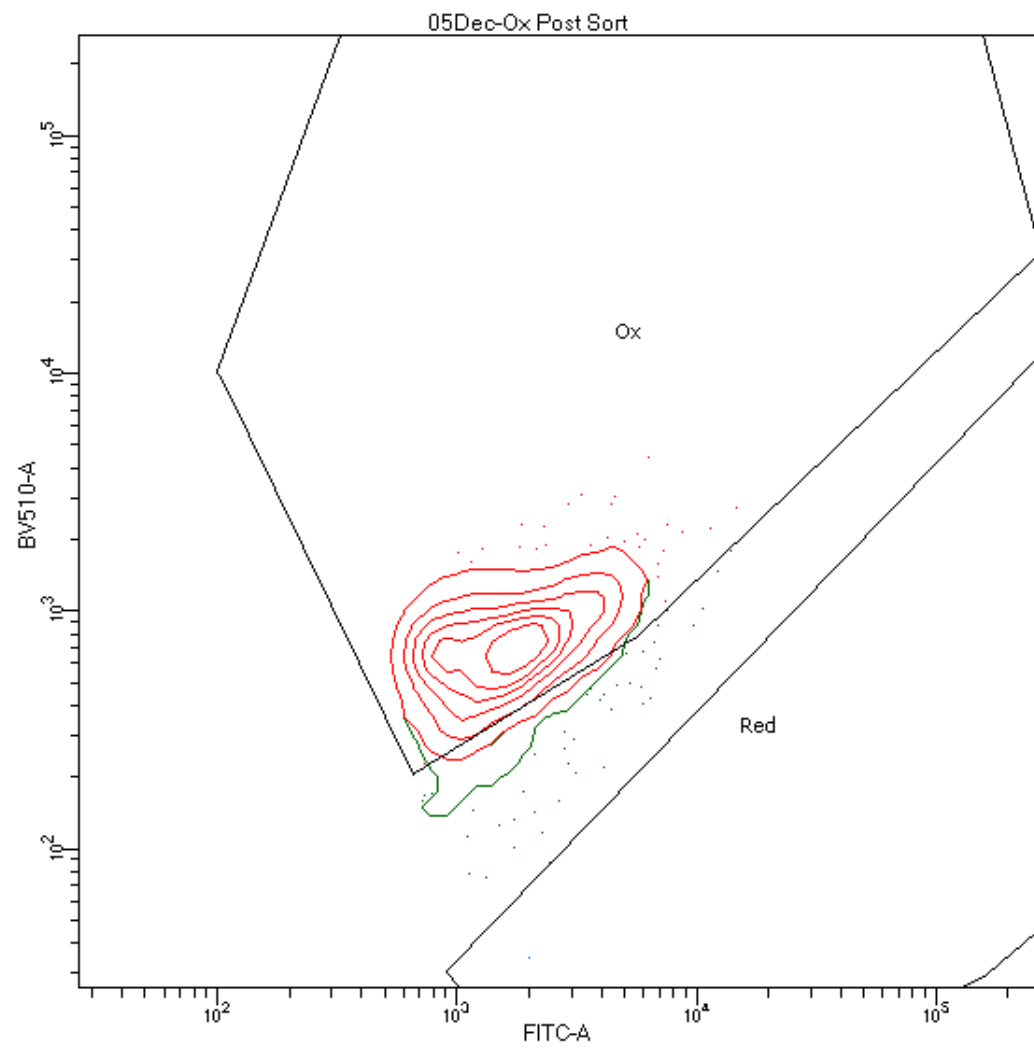

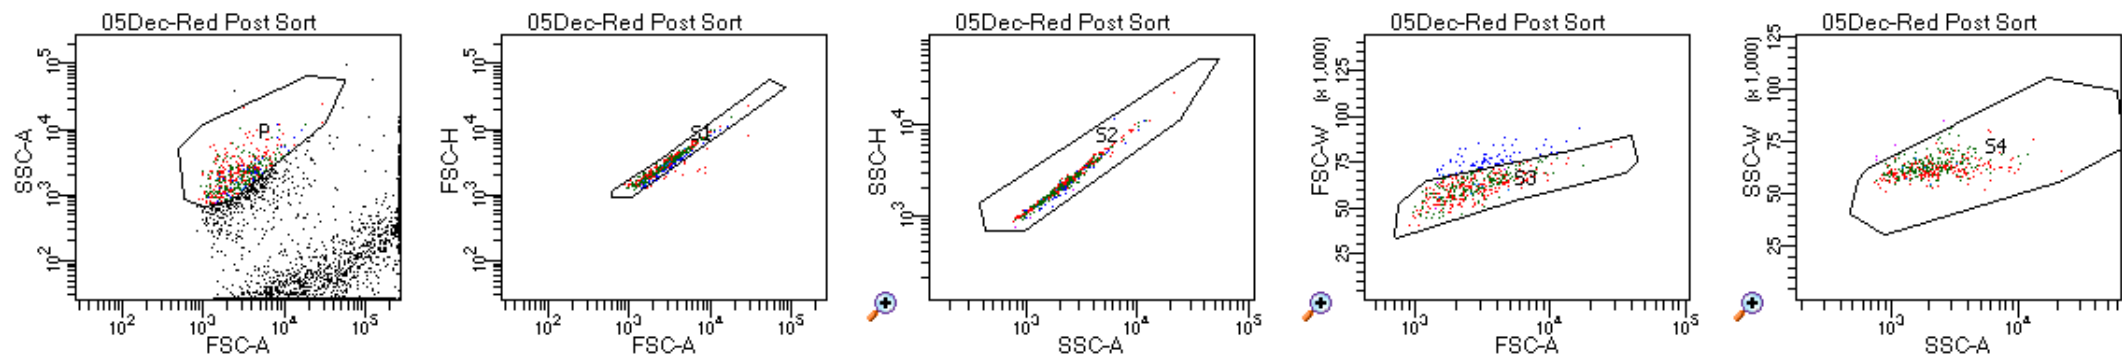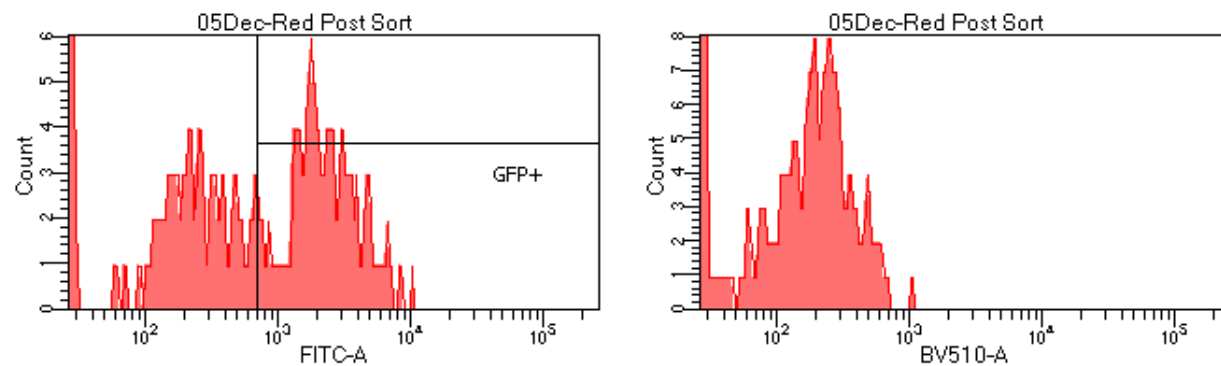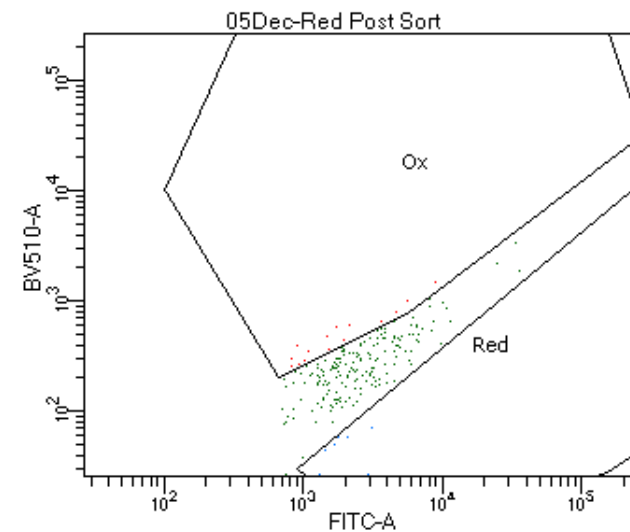

Tube: Red Post Sort

| Population | #Events | %Parent | %Total |
|------------|---------|---------|--------|
| All Events | 4,648   | ####    | 100.0  |
| P          | 513     | 11.0    | 11.0   |
| S1         | 496     | 96.7    | 10.7   |
| S2         | 496     | 100.0   | 10.7   |
| S3         | 421     | 84.9    | 9.1    |
| S4         | 417     | 99.0    | 9.0    |
| GFP+       | 206     | 49.4    | 4.4    |
| Ox         | 15      | 7.3     | 0.3    |
| Red        | 7       | 3.4     | 0.2    |

|                  |                                |
|------------------|--------------------------------|
| Experiment Name: | 05EDec2016 Bac sorting         |
| Specimen Name:   | 05Dec                          |
| Tube Name:       | Red Post Sort                  |
| Record Date:     | Dec 5, 2016 4:24:26 PM         |
| SOP:             | Administrator                  |
| GUID:            | 2cd99c73-31ca-4a5d-a6d5-619... |

  

| Population | #Events | %Parent | FITC-A<br>Median | BV510-A<br>Median |
|------------|---------|---------|------------------|-------------------|
| S4         | 417     | 99.0    | 662              | 161               |
| GFP+       | 206     | 49.4    | 2,254            | 250               |
| Ox         | 15      | 7.3     | 1,494            | 436               |
| Red        | 7       | 3.4     | 1,756            | 50                |

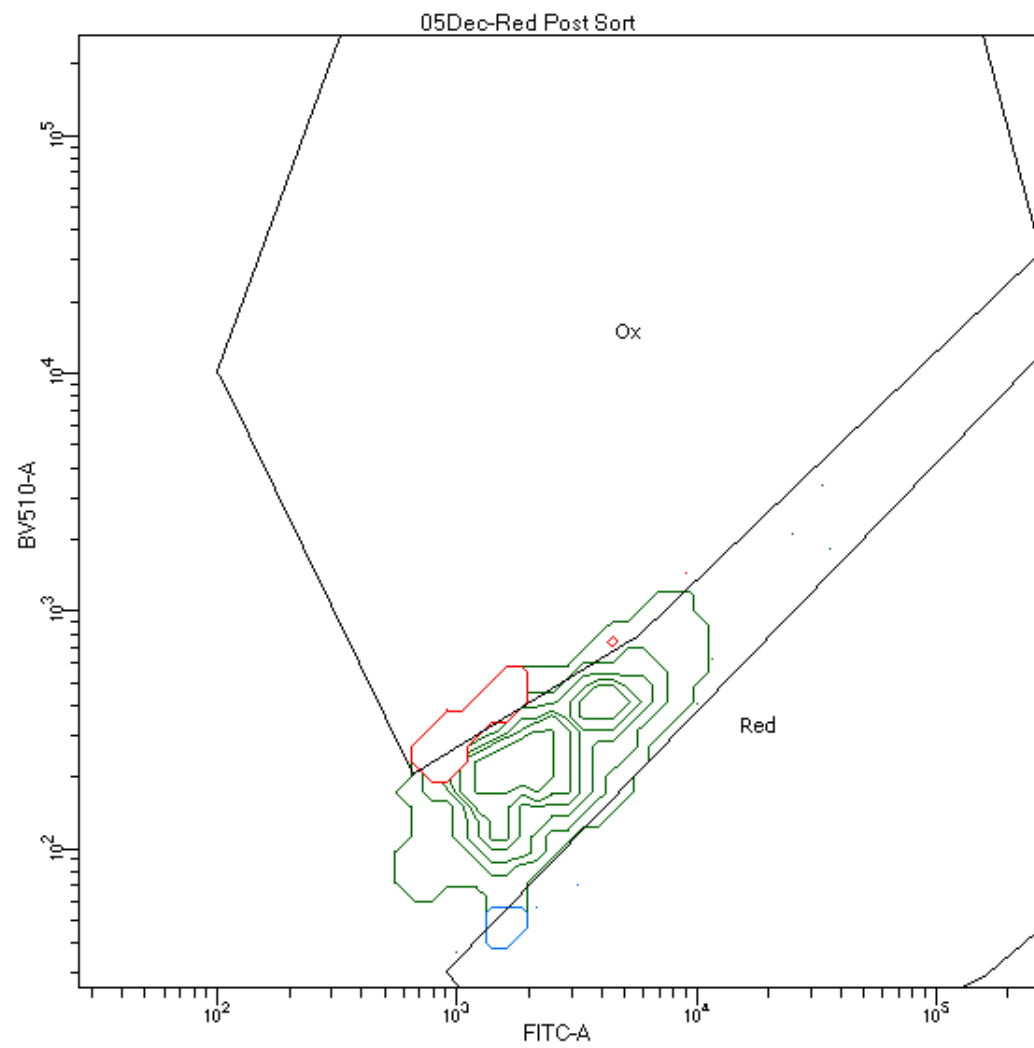

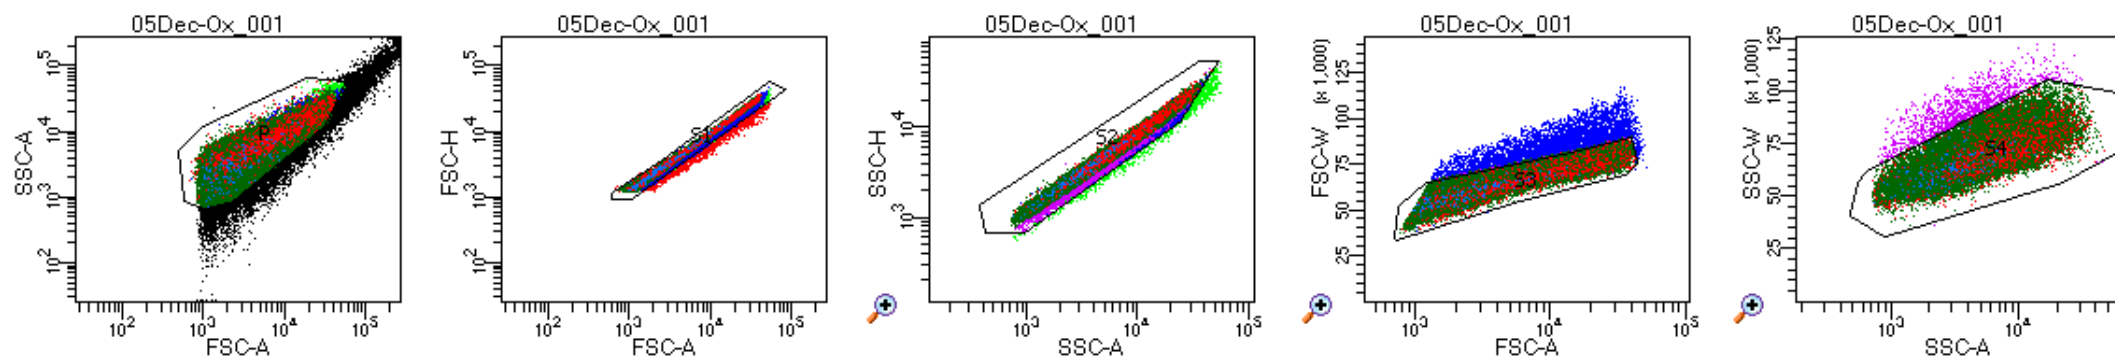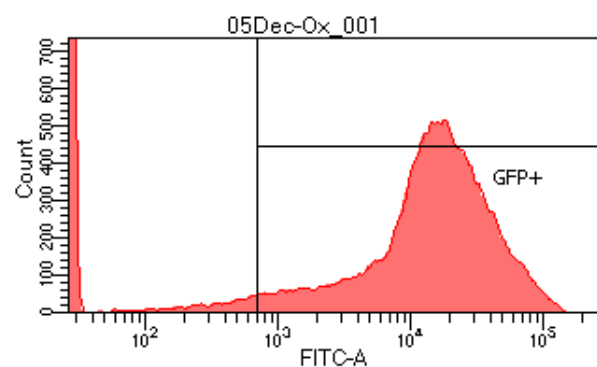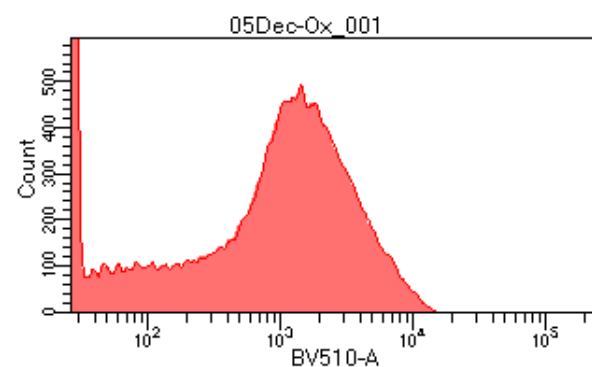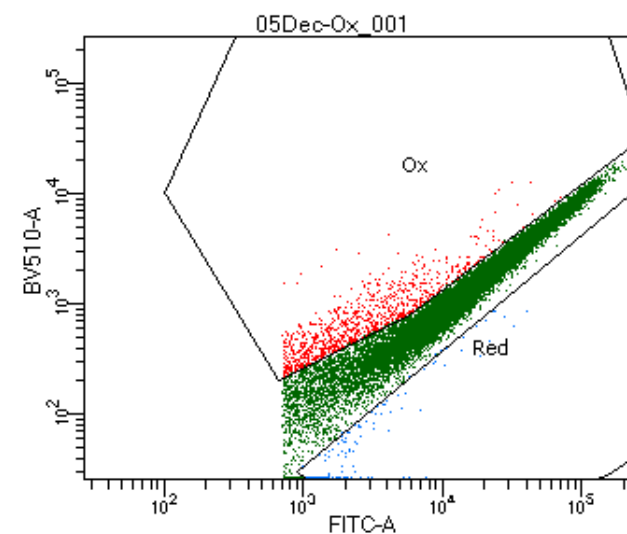

Tube: Ox\_001

| Population | #Events | %Parent | %Total |
|------------|---------|---------|--------|
| All Events | 57,851  | ####    | 100.0  |
| P          | 50,000  | 86.4    | 86.4   |
| S1         | 48,685  | 97.4    | 84.2   |
| S2         | 47,755  | 98.1    | 82.5   |
| S3         | 43,037  | 90.1    | 74.4   |
| S4         | 41,709  | 96.9    | 72.1   |
| GFP+       | 29,482  | 70.7    | 51.0   |
| Ox         | 902     | 3.1     | 1.6    |
| Red        | 136     | 0.5     | 0.2    |

Experiment Name: 05EDec2016 Bac sorting  
 Specimen Name: 05Dec  
 Tube Name: Ox\_001  
 Record Date: Dec 5, 2016 4:25:28 PM  
 SOP: Administrator  
 GUID: d4b9efa1-0167-47af-b938-078f...

| Population | #Events | %Parent | FITC-A<br>Median | BV510-A<br>Median |
|------------|---------|---------|------------------|-------------------|
| S4         | 41,709  | 96.9    | 9,983            | 837               |
| GFP+       | 29,482  | 70.7    | 15,811           | 1,360             |
| Ox         | 902     | 3.1     | 2,257            | 647               |
| Red        | 136     | 0.5     | 1,999            | 42                |

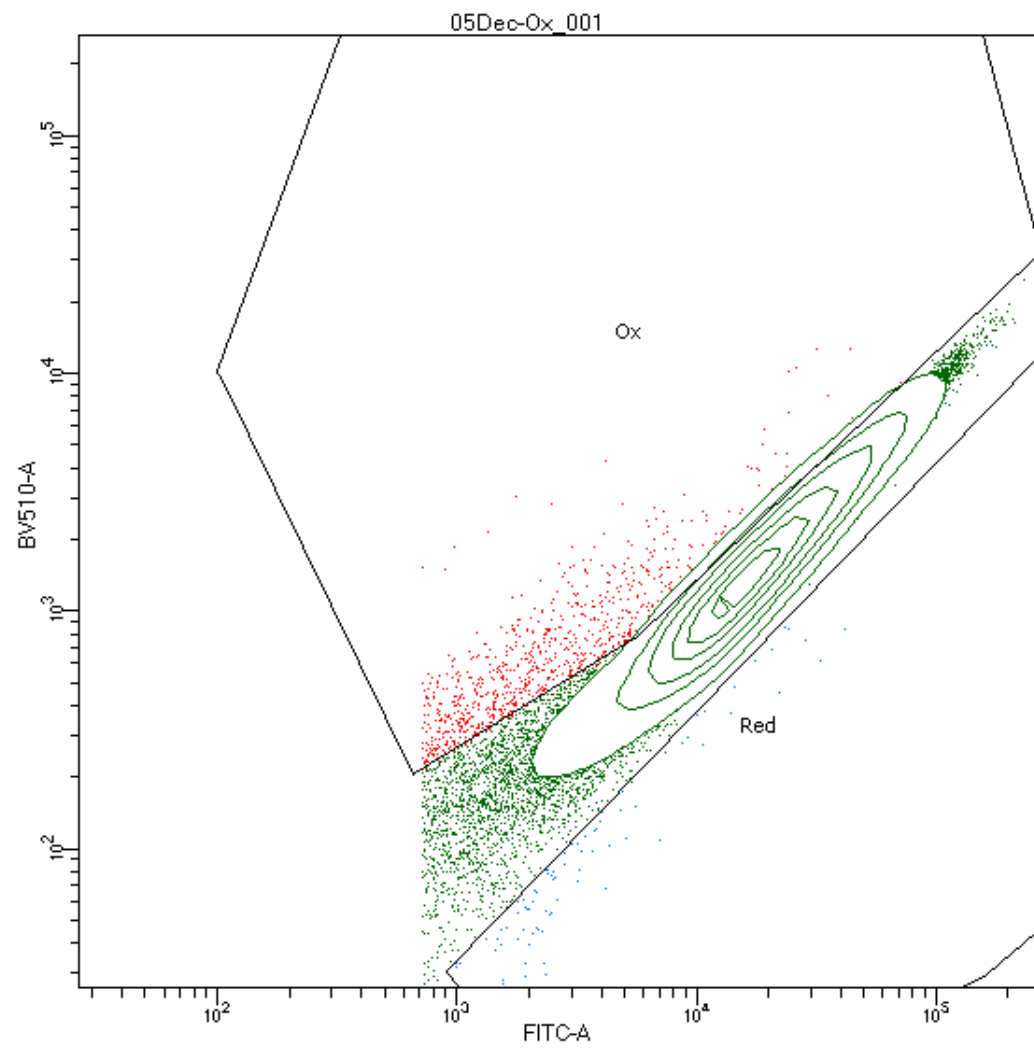

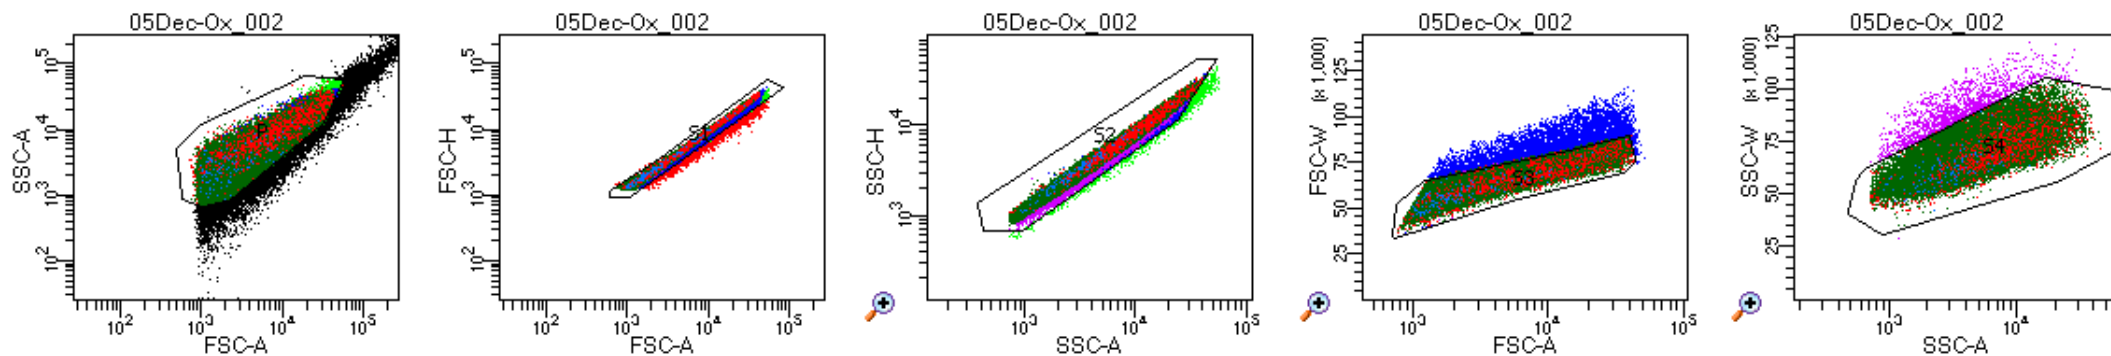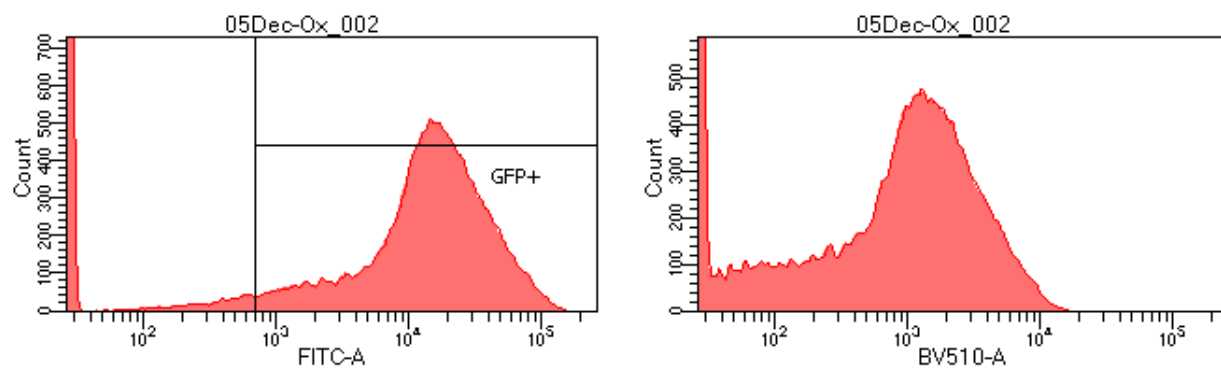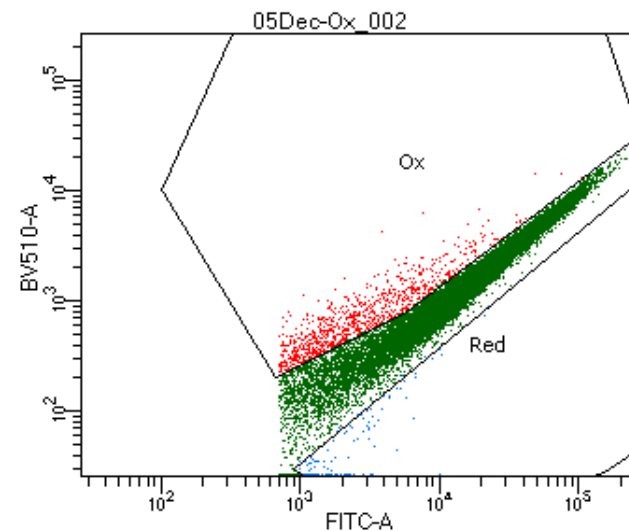

Tube: Ox\_002

| Population | #Events | %Parent | %Total |
|------------|---------|---------|--------|
| All Events | 58,137  | ####    | 100.0  |
| P          | 50,000  | 86.0    | 86.0   |
| S1         | 48,577  | 97.2    | 83.6   |
| S2         | 47,655  | 98.1    | 82.0   |
| S3         | 42,806  | 89.8    | 73.6   |
| S4         | 41,437  | 96.8    | 71.3   |
| GFP+       | 29,233  | 70.5    | 50.3   |
| Ox         | 888     | 3.0     | 1.5    |
| Red        | 124     | 0.4     | 0.2    |

Experiment Name: 05EDec2016 Bac sorting  
Specimen Name: 05Dec  
Tube Name: OX\_002  
Record Date: Dec 5, 2016 4:26:04 PM  
\$OP: Administrator  
GUID: 64c36e93-44d9-499b-b0b3-2c3...

| Population                                                                                 | #Events | %Parent | FITC-A<br>Median | BV510-A<br>Median |
|--------------------------------------------------------------------------------------------|---------|---------|------------------|-------------------|
|  S4   | 41,437  | 96.8    | 9,612            | 815               |
|  GFP+ | 29,233  | 70.5    | 15,378           | 1,327             |
|  OX   | 888     | 3.0     | 2,395            | 685               |
|  Red  | 124     | 0.4     | 1,792            | 33                |



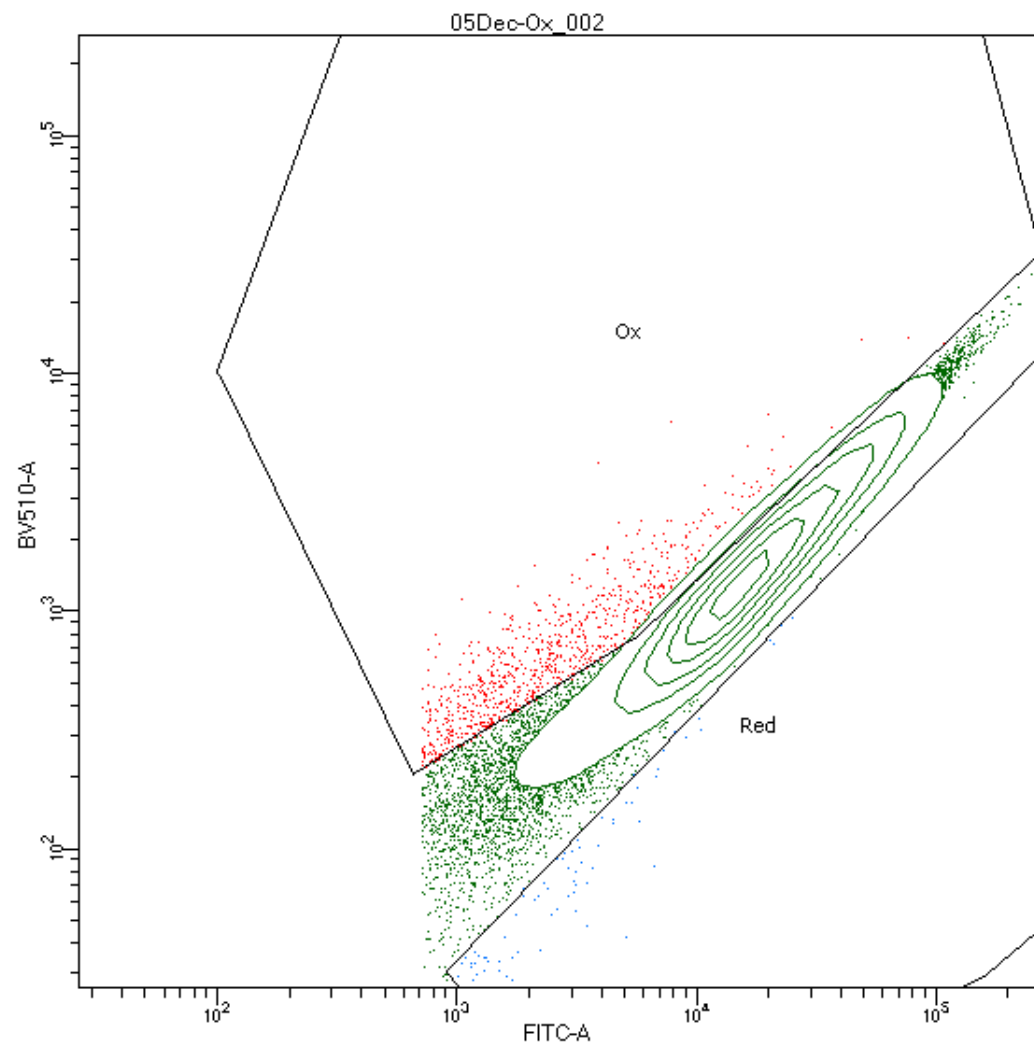

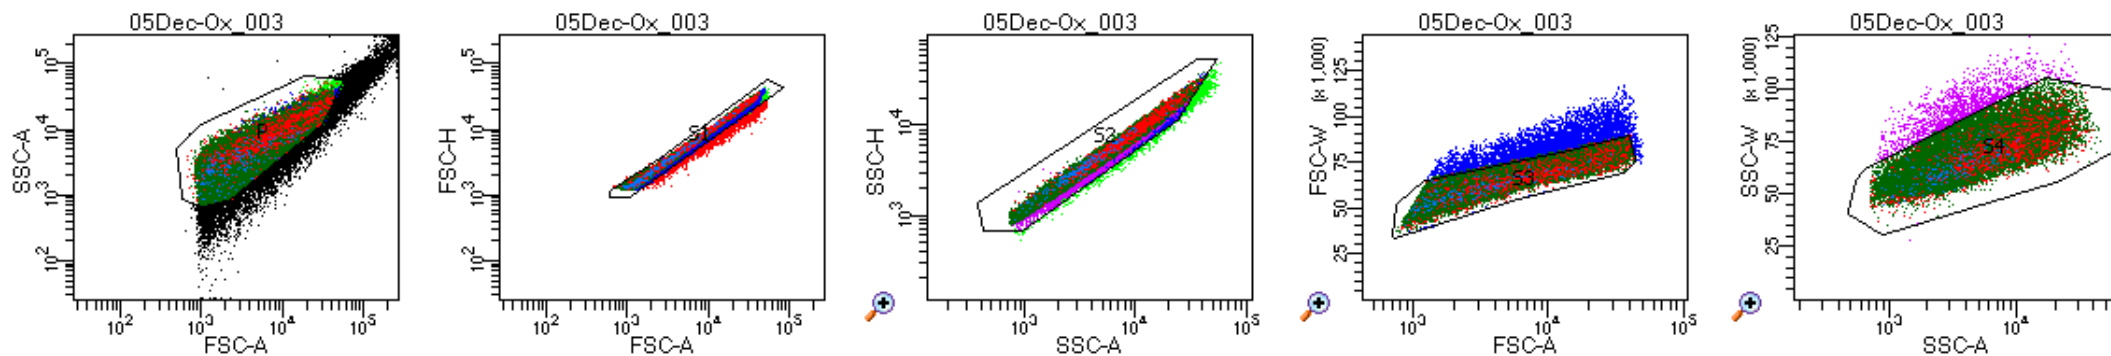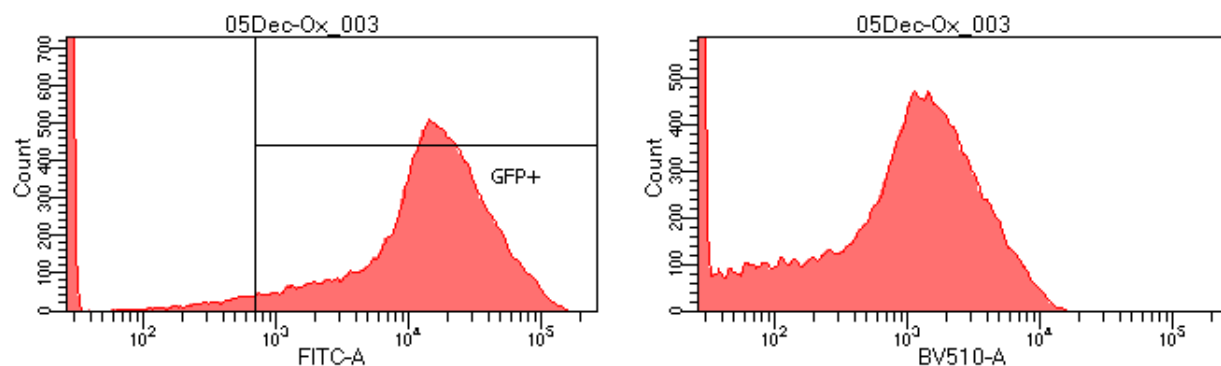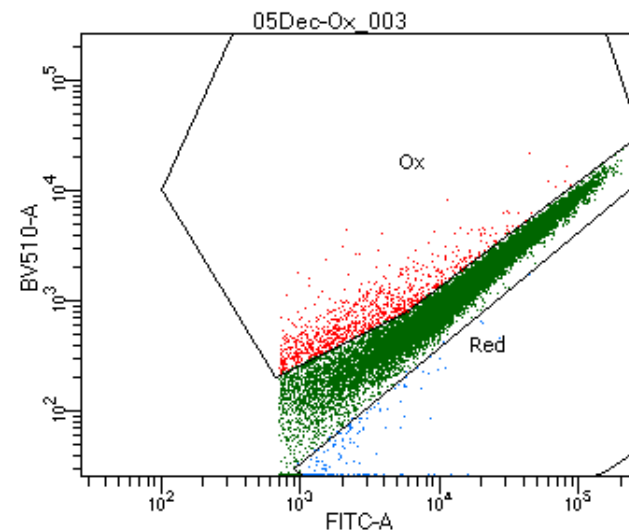

Tube: Ox\_003

| Population | #Events | %Parent | %Total |
|------------|---------|---------|--------|
| All Events | 58,647  | ####    | 100.0  |
| P          | 50,000  | 85.3    | 85.3   |
| S1         | 48,536  | 97.1    | 82.8   |
| S2         | 47,643  | 98.2    | 81.2   |
| S3         | 42,963  | 90.2    | 73.3   |
| S4         | 41,573  | 96.8    | 70.9   |
| GFP+       | 29,425  | 70.8    | 50.2   |
| Ox         | 906     | 3.1     | 1.5    |
| Red        | 172     | 0.6     | 0.3    |

|                  |                                |  |  |  |
|------------------|--------------------------------|--|--|--|
| Experiment Name: | 05EDec2016 Bac sorting         |  |  |  |
| Specimen Name:   | 05Dec                          |  |  |  |
| Tube Name:       | Ox_003                         |  |  |  |
| Record Date:     | Dec 5, 2016 4:26:38 PM         |  |  |  |
| SOP:             | Administrator                  |  |  |  |
| GUID:            | 9b49a9cc-c153-4f87-93a6-126... |  |  |  |

  

| Population                                                                                 | #Events | %Parent | FITC-A<br>Median | BV510-A<br>Median |
|--------------------------------------------------------------------------------------------|---------|---------|------------------|-------------------|
|  S4   | 41,573  | 96.8    | 9,841            | 820               |
|  GFP+ | 29,425  | 70.8    | 15,676           | 1,341             |
|  Ox   | 906     | 3.1     | 2,513            | 708               |
|  Red  | 172     | 0.6     | 1,993            | 37                |

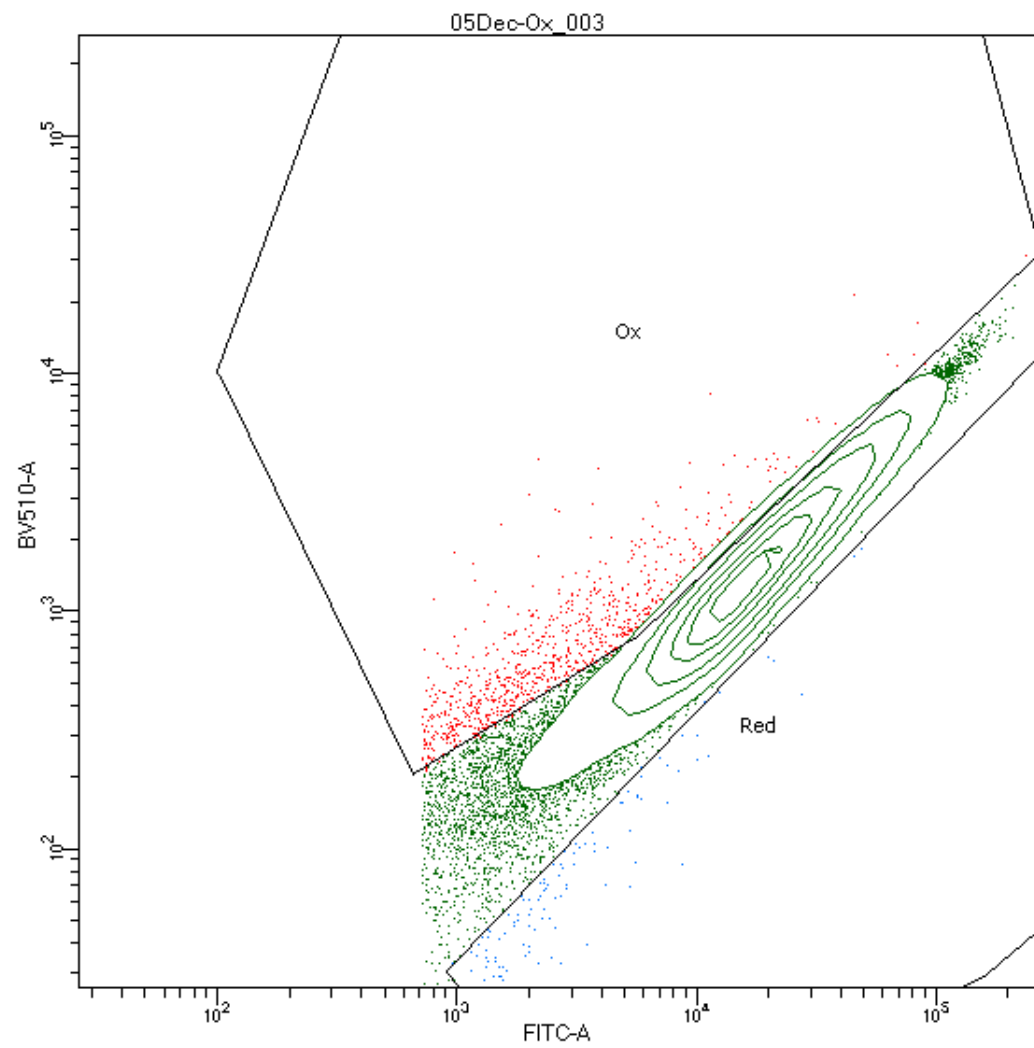

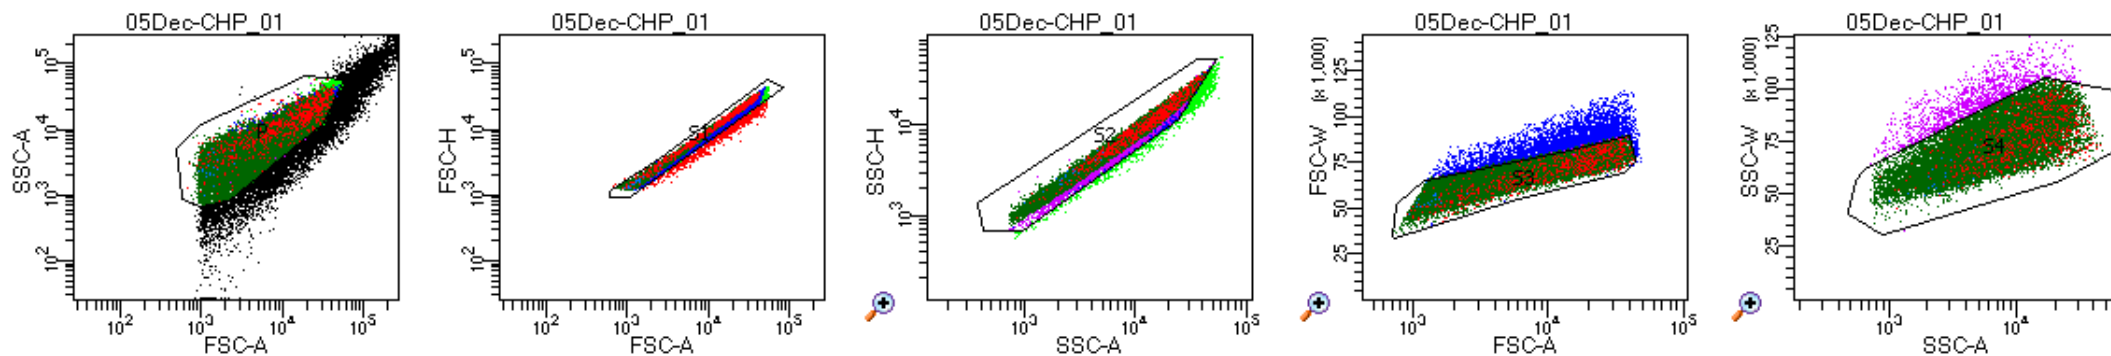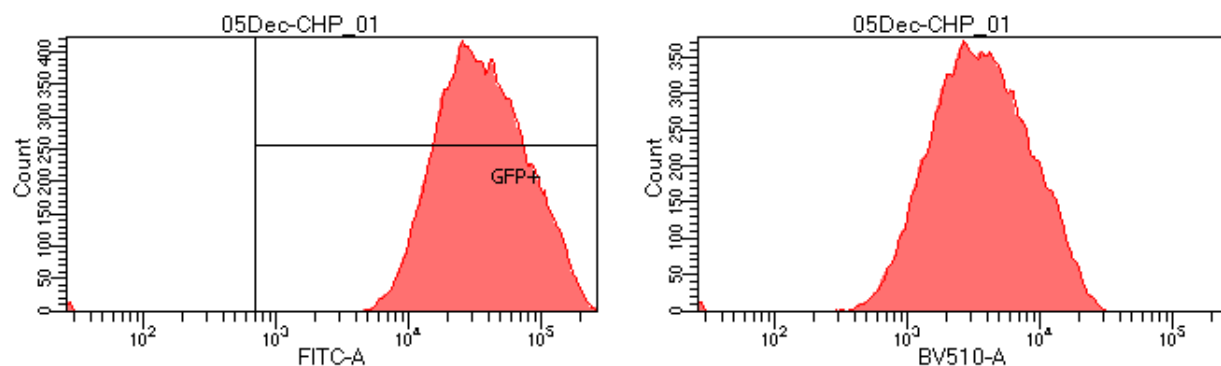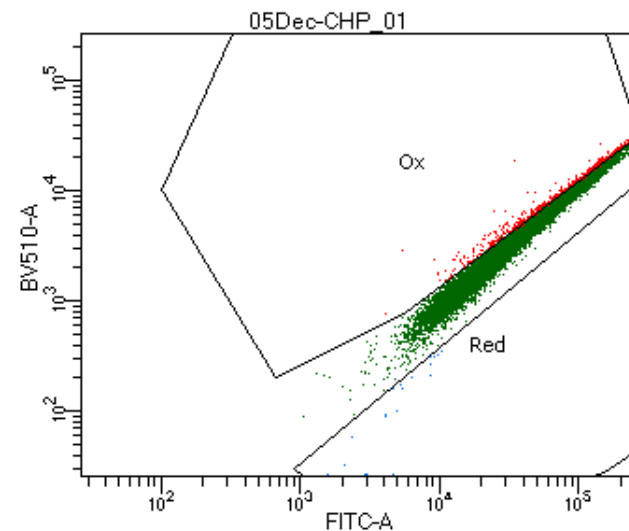

Tube: CHP\_01

| Population | #Events | %Parent | %Total |
|------------|---------|---------|--------|
| All Events | 38,157  | ####    | 100.0  |
| P          | 30,000  | 78.6    | 78.6   |
| S1         | 28,951  | 96.5    | 75.9   |
| S2         | 27,801  | 96.0    | 72.9   |
| S3         | 24,211  | 87.1    | 63.5   |
| S4         | 23,006  | 95.0    | 60.3   |
| GFP+       | 22,963  | 99.8    | 60.2   |
| Ox         | 676     | 2.9     | 1.8    |
| Red        | 20      | 0.1     | 0.1    |

|                  |                                 |  |  |  |
|------------------|---------------------------------|--|--|--|
| Experiment Name: | 05EDec2016 Bac sorting          |  |  |  |
| Specimen Name:   | 05Dec                           |  |  |  |
| Tube Name:       | CHP_01                          |  |  |  |
| Record Date:     | Dec 5, 2016 4:28:58 PM          |  |  |  |
| SOP:             | Administrator                   |  |  |  |
| GUID:            | de7e91f5-35f1-4e28-a8a8-a161... |  |  |  |

  

| Population                                                                                 | #Events | %Parent | FITC-A<br>Median | BV510-A<br>Median |
|--------------------------------------------------------------------------------------------|---------|---------|------------------|-------------------|
|  S4   | 23,006  | 95.0    | 33,763           | 3,400             |
|  GFP+ | 22,963  | 99.8    | 33,833           | 3,407             |
|  Ox   | 676     | 2.9     | 89,685           | 11,703            |
|  Red  | 20      | 0.1     | 4,738            | 129               |

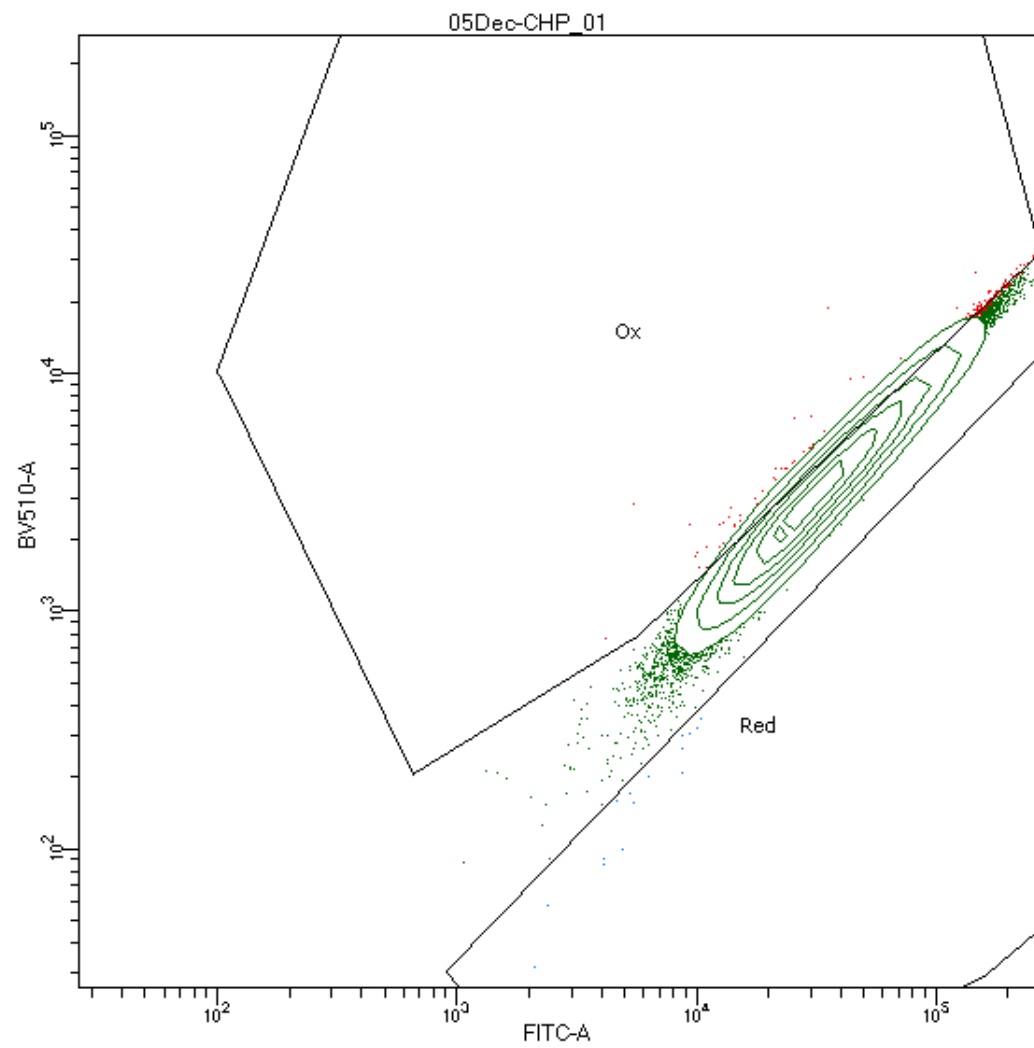

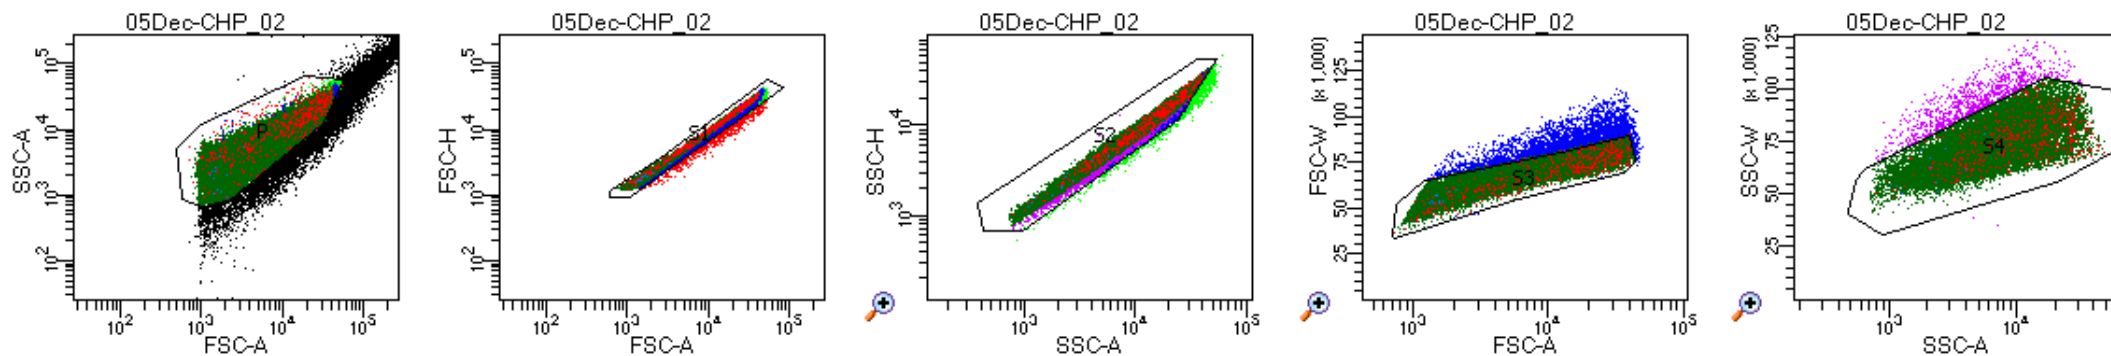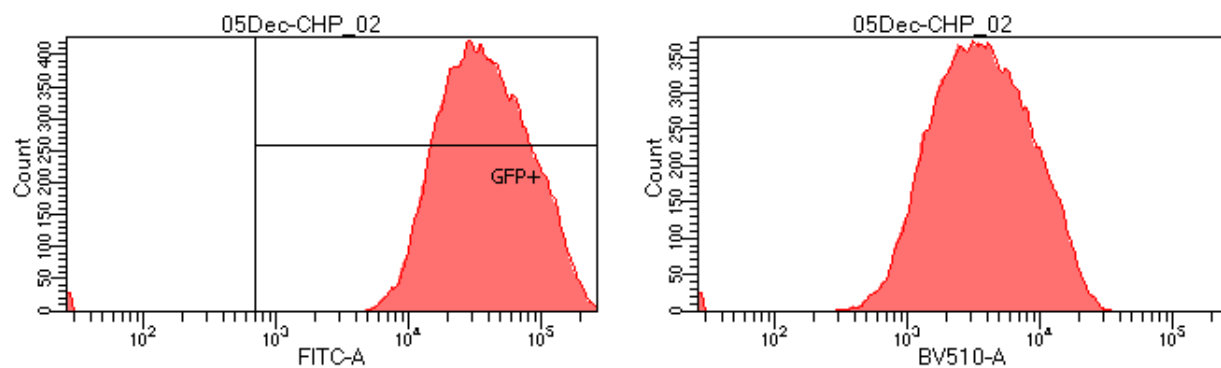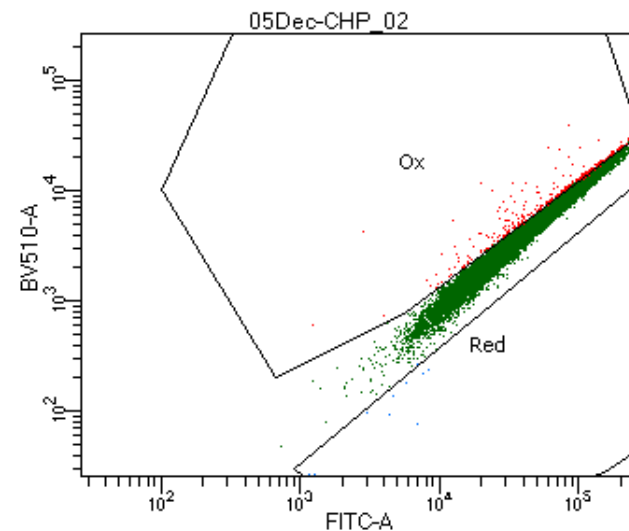

Tube: CHP\_02

| Population | #Events | %Parent | %Total |
|------------|---------|---------|--------|
| All Events | 39,242  | ####    | 100.0  |
| P          | 30,000  | 76.4    | 76.4   |
| S1         | 29,258  | 97.5    | 74.6   |
| S2         | 28,379  | 97.0    | 72.3   |
| S3         | 25,294  | 89.1    | 64.5   |
| S4         | 24,323  | 96.2    | 62.0   |
| GFP+       | 24,240  | 99.7    | 61.8   |
| Ox         | 473     | 2.0     | 1.2    |
| Red        | 11      | 0.0     | 0.0    |

|                  |                                |  |  |  |  |
|------------------|--------------------------------|--|--|--|--|
| Experiment Name: | 05EDec2016 Bac sorting         |  |  |  |  |
| Specimen Name:   | 05Dec                          |  |  |  |  |
| Tube Name:       | CHP_02                         |  |  |  |  |
| Record Date:     | Dec 5, 2016 4:29:45 PM         |  |  |  |  |
| SOP:             | Administrator                  |  |  |  |  |
| GUID:            | c3eab172-195a-4b10-b966-e27... |  |  |  |  |

  

| Population                                                                                 | #Events | %Parent | FITC-A<br>Median | BV510-A<br>Median |
|--------------------------------------------------------------------------------------------|---------|---------|------------------|-------------------|
|  S4   | 24,323  | 96.2    | 35,174           | 3,454             |
|  GFP+ | 24,240  | 99.7    | 35,328           | 3,465             |
|  Ox   | 473     | 2.0     | 92,899           | 12,537            |
|  Red  | 11      | 0.0     | 4,576            | 97                |

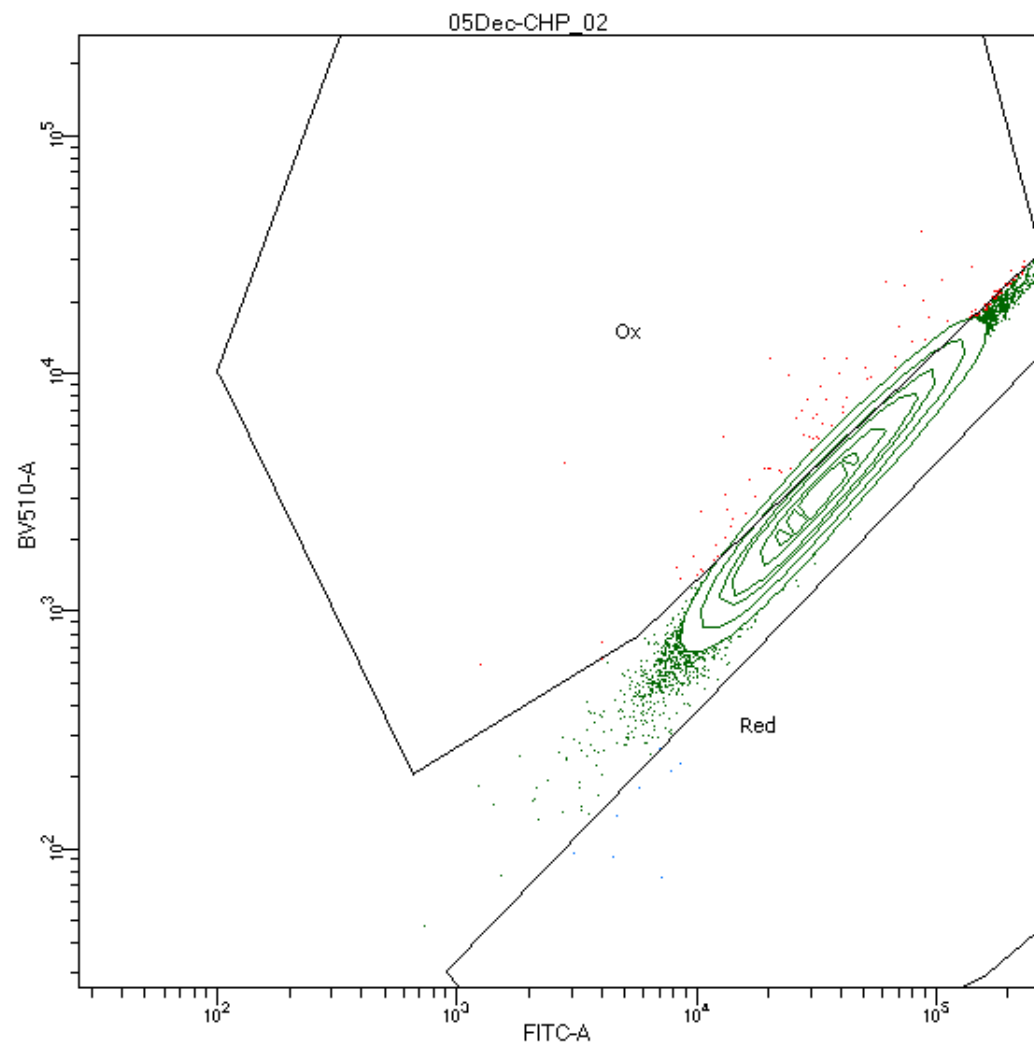

Supplement: supp [file elife-80218-supp-v1.zip]
