# Supplementary material for: Biosensor-integrated transposon mutagenesis reveals rv0158 as a coordinator of redox homeostasis in Mycobacterium tuberculosis
Source: eLife journal article supplement (doi:10.7554/elife.80218), 2023-08-29

# Batch Analysis Report

Run Date: 2/2/16 3:41 PM

Experiment: 02Feb2016 Bact Sorting

User ID: Administrator

Statistics Output: C:\Users\Admin\Desktop\02Feb2016 Bact Sorting-Batch\_Analysis\_02022016154146.csv

Worksheet PDF Output: C:\Users\Admin\Desktop\02Feb2016 Bact Sorting-Batch\_Analysis\_02022016154146.pdf

## Specimen\_001

| Tube           | Status | Run Time       |
|----------------|--------|----------------|
| RV US          | OK     | 2/2/16 3:41 PM |
| mrx1 rogfp     | OK     | 2/2/16 3:41 PM |
| mrx1 rogfp_001 | OK     | 2/2/16 3:41 PM |
| TN40K_001      | OK     | 2/2/16 3:41 PM |
| TN40K_002      | OK     | 2/2/16 3:41 PM |
| TN40K_003      | OK     | 2/2/16 3:41 PM |
| post sort      | OK     | 2/2/16 3:42 PM |

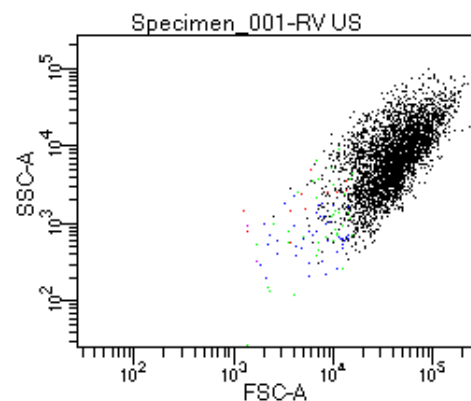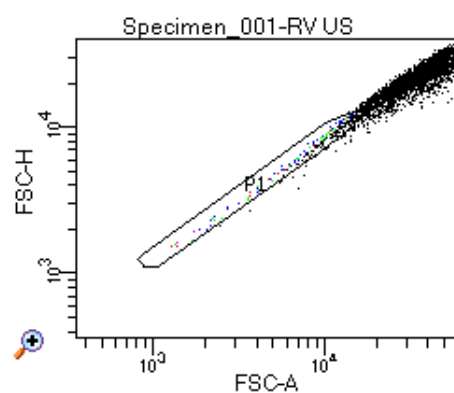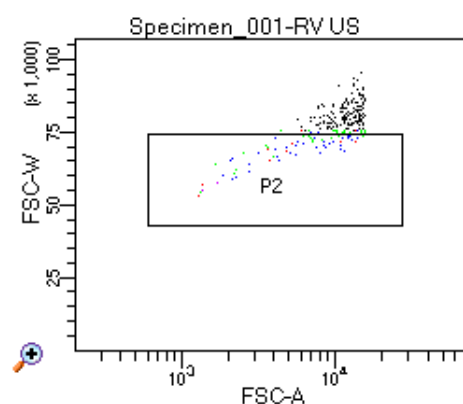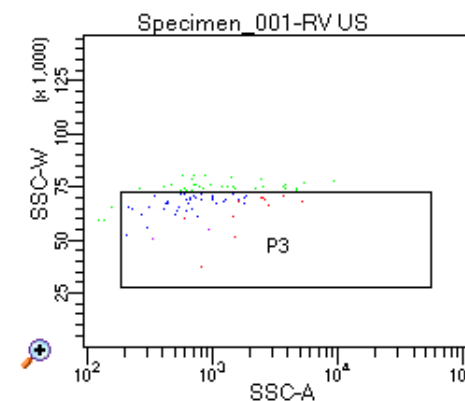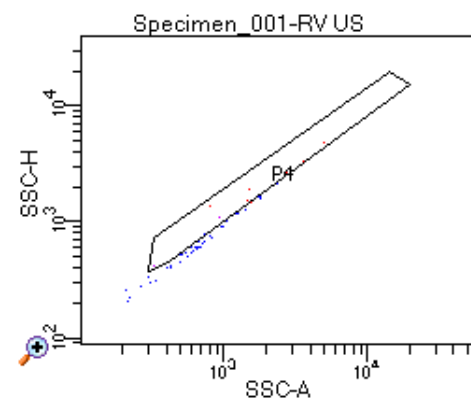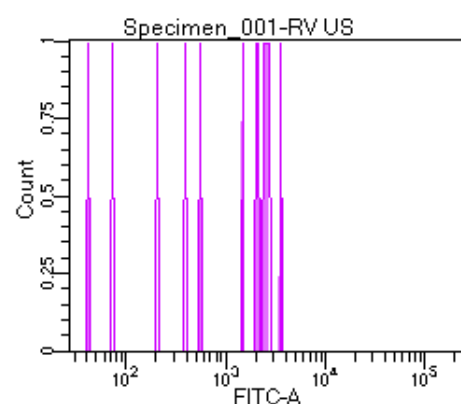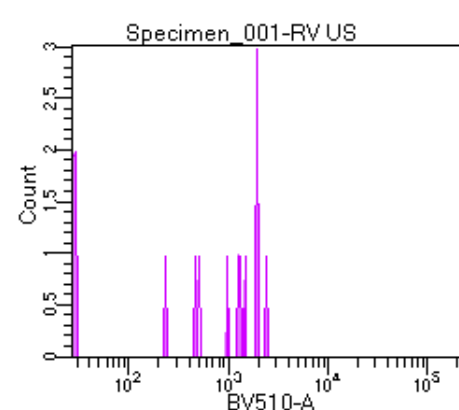

Experiment Name: 02Feb2016 Bact Sorting  
 Specimen Name: Specimen\_001  
 Tube Name: RV US  
 Record Date: Feb 2, 2016 2:52:28 PM  
 SOP: Administrator  
 GUID: 76a8b5c1-5df2-4417-83e7-c64...

| Population | #Events | %Parent | FITC-A<br>Median | BV510-A<br>Median |
|------------|---------|---------|------------------|-------------------|
| All Events | 3,500   | ####    | 8,128            | 5,347             |
| P1         | 249     | 7.1     | 2,619            | 1,856             |
| P2         | 95      | 38.2    | 1,193            | 777               |
| P3         | 56      | 58.9    | 1,163            | 742               |
| P4         | 13      | 23.2    | 1,870            | 1,189             |
| P5         | 11      | 84.6    | 1,942            | 1,248             |

Tube: RV US

| Population | #Events | %Parent | %Total |
|------------|---------|---------|--------|
| All Events | 3,500   | ####    | 100.0  |
| P1         | 249     | 7.1     | 7.1    |
| P2         | 95      | 38.2    | 2.7    |
| P3         | 56      | 58.9    | 1.6    |
| P4         | 13      | 23.2    | 0.4    |
| P5         | 11      | 84.6    | 0.3    |

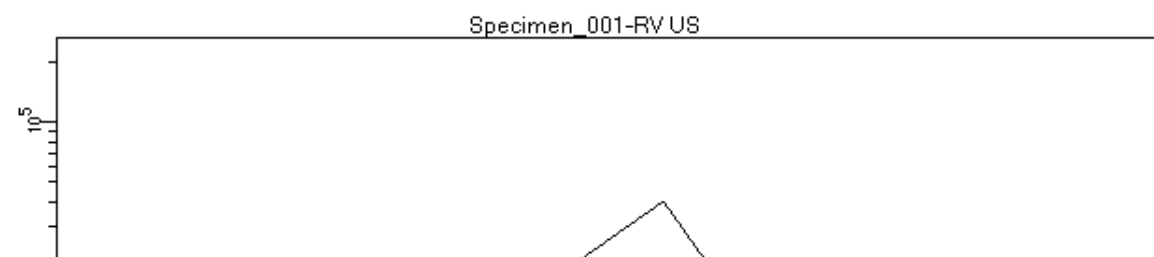

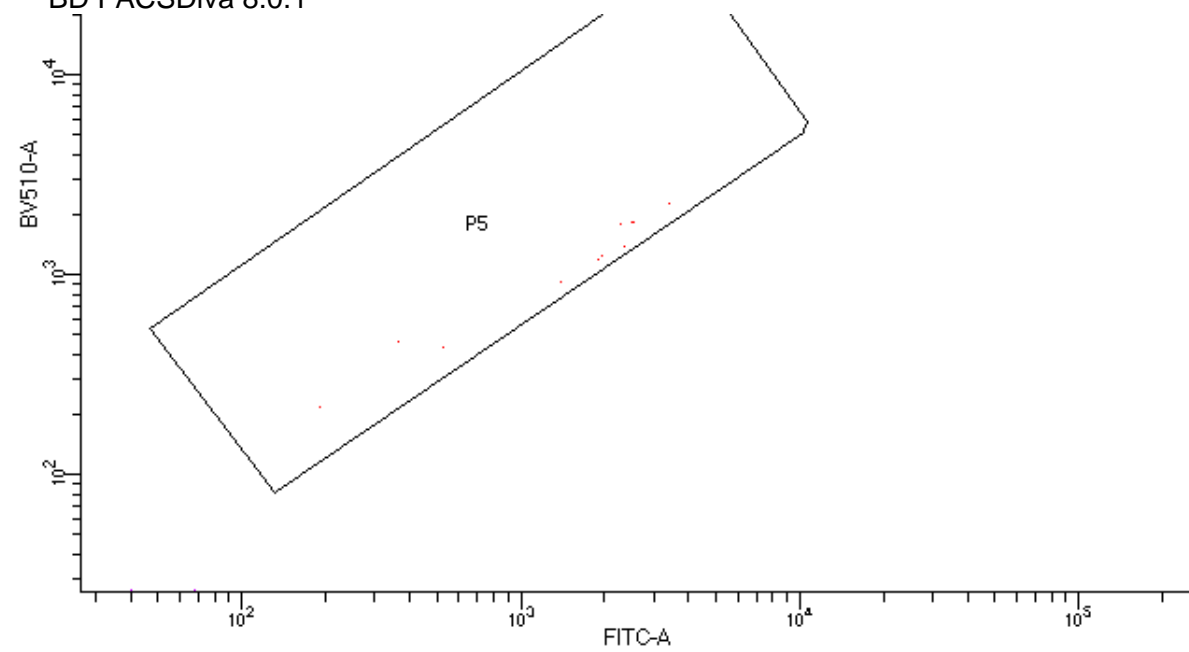

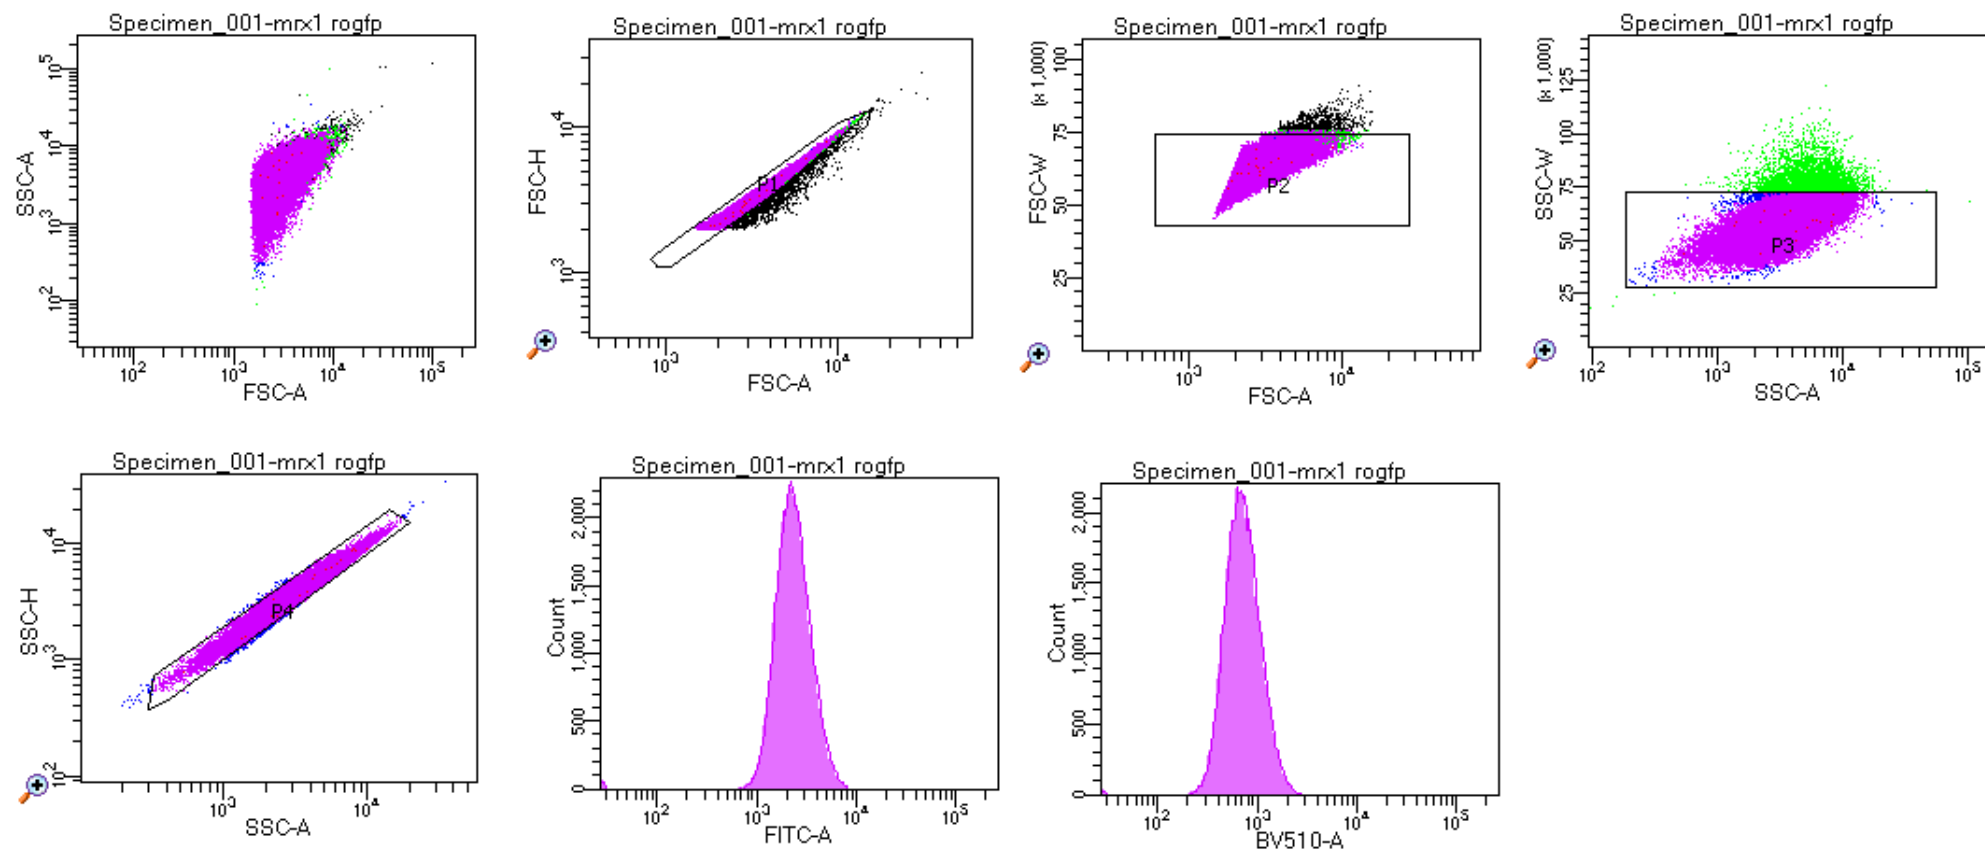

| Experiment Name: | 02Feb2016 Bact Sorting          |         |                  |                   |
|------------------|---------------------------------|---------|------------------|-------------------|
| Specimen Name:   | Specimen_001                    |         |                  |                   |
| Tube Name:       | mrx1 rogfp                      |         |                  |                   |
| Record Date:     | Feb 2, 2016 2:56:11 PM          |         |                  |                   |
| \$OP:            | Administrator                   |         |                  |                   |
| GUID:            | 7e6bfa69-92af-4b80-b5ab-4aaf... |         |                  |                   |
| Population       | #Events                         | %Parent | FITC-A<br>Median | BV510-A<br>Median |
| All Events       | 67,381                          | ####    | 2,230            | 679               |
| P1               | 65,644                          | 97.4    | 2,206            | 671               |
| P2               | 64,956                          | 99.0    | 2,194            | 668               |
| P3               | 60,963                          | 93.9    | 2,138            | 651               |
| P4               | 60,475                          | 99.2    | 2,138            | 651               |
| P5               | 18                              | 0.0     | 604              | 832               |

| Tube: mrx1 rogfp |         |         |        |
|------------------|---------|---------|--------|
| Population       | #Events | %Parent | %Total |
| All Events       | 67,381  | ####    | 100.0  |
| P1               | 65,644  | 97.4    | 97.4   |
| P2               | 64,956  | 99.0    | 96.4   |
| P3               | 60,963  | 93.9    | 90.5   |
| P4               | 60,475  | 99.2    | 89.8   |
| P5               | 18      | 0.0     | 0.0    |

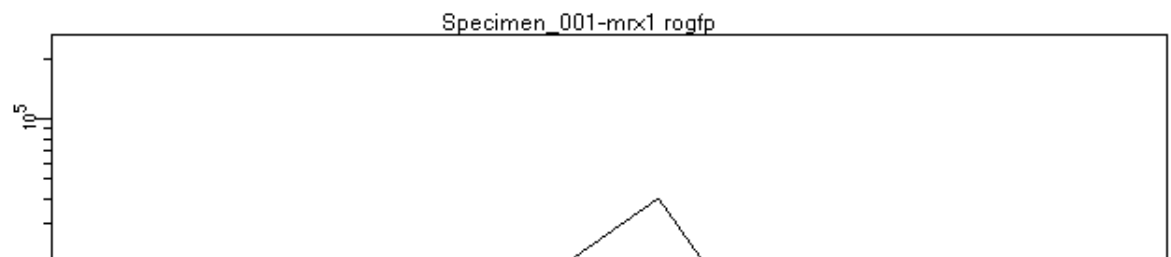

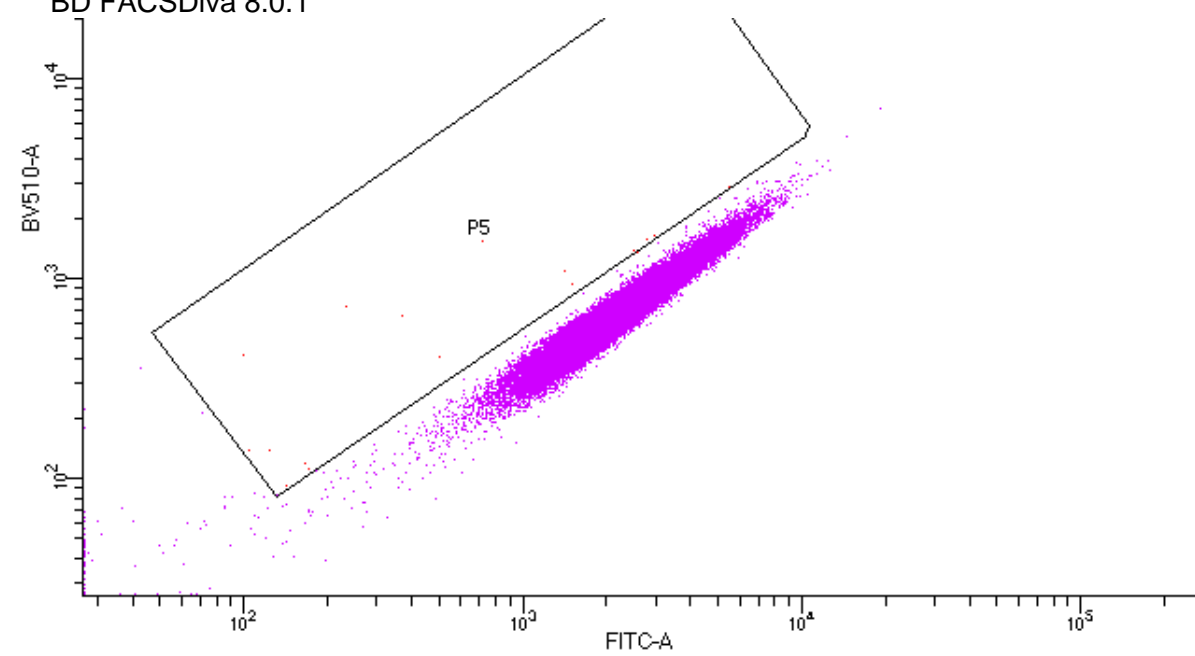

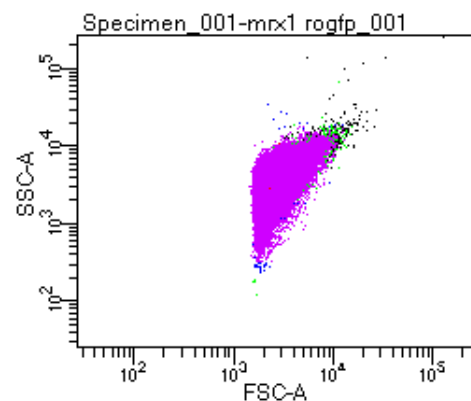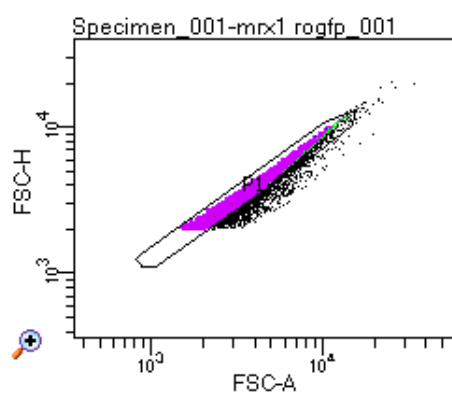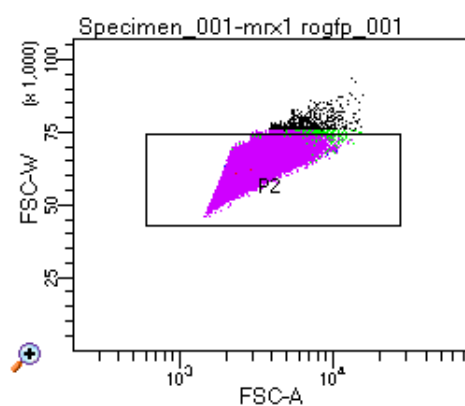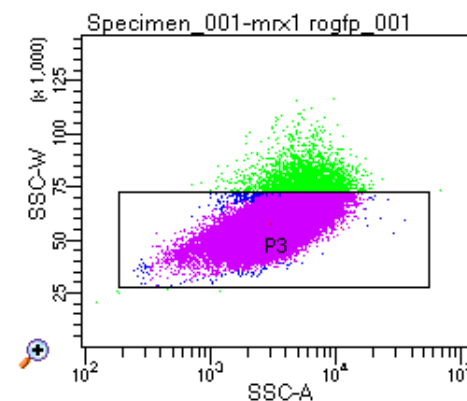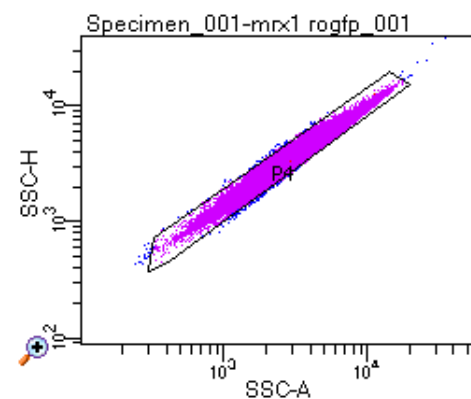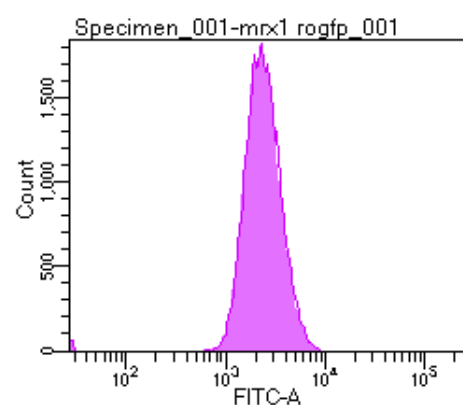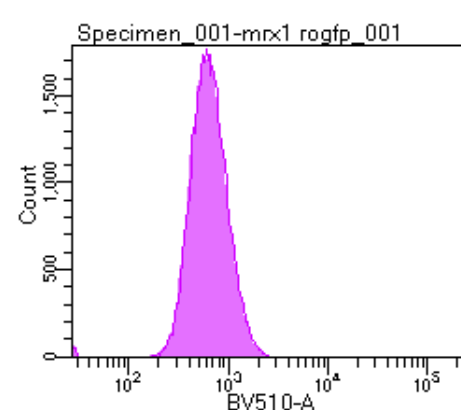

Experiment Name: 02Feb2016 Bact Sorting  
 Specimen Name: Specimen\_001  
 Tube Name: mrx1 rogfp\_001  
 Record Date: Feb 2, 2016 2:57:41 PM  
 SOP: Administrator  
 GUID: 31646a9c-dfff-4a26-990f-fc8905...

| Population | #Events | %Parent | FITC-A<br>Median | BV510-A<br>Median |
|------------|---------|---------|------------------|-------------------|
| All Events | 56,173  | ####    | 2,279            | 611               |
| P1         | 54,708  | 97.4    | 2,253            | 605               |
| P2         | 54,110  | 98.9    | 2,240            | 601               |
| P3         | 50,718  | 93.7    | 2,182            | 584               |
| P4         | 50,343  | 99.3    | 2,182            | 584               |
| P5         | 2       | 0.0     | 1,978            | 1,515             |

Tube: mrx1 rogfp\_001

| Population | #Events | %Parent | %Total |
|------------|---------|---------|--------|
| All Events | 56,173  | ####    | 100.0  |
| P1         | 54,708  | 97.4    | 97.4   |
| P2         | 54,110  | 98.9    | 96.3   |
| P3         | 50,718  | 93.7    | 90.3   |
| P4         | 50,343  | 99.3    | 89.6   |
| P5         | 2       | 0.0     | 0.0    |

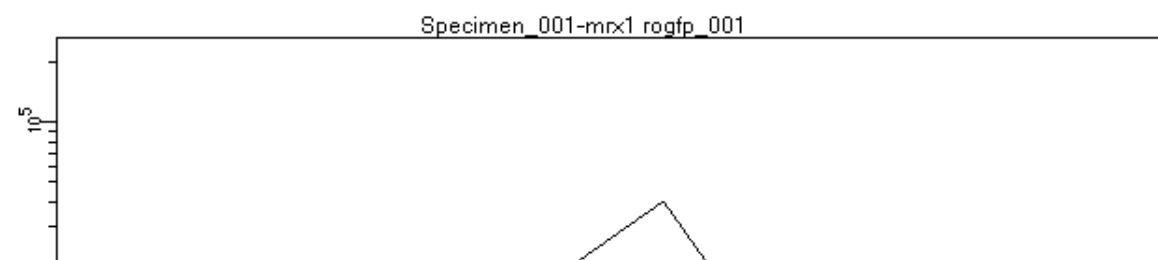

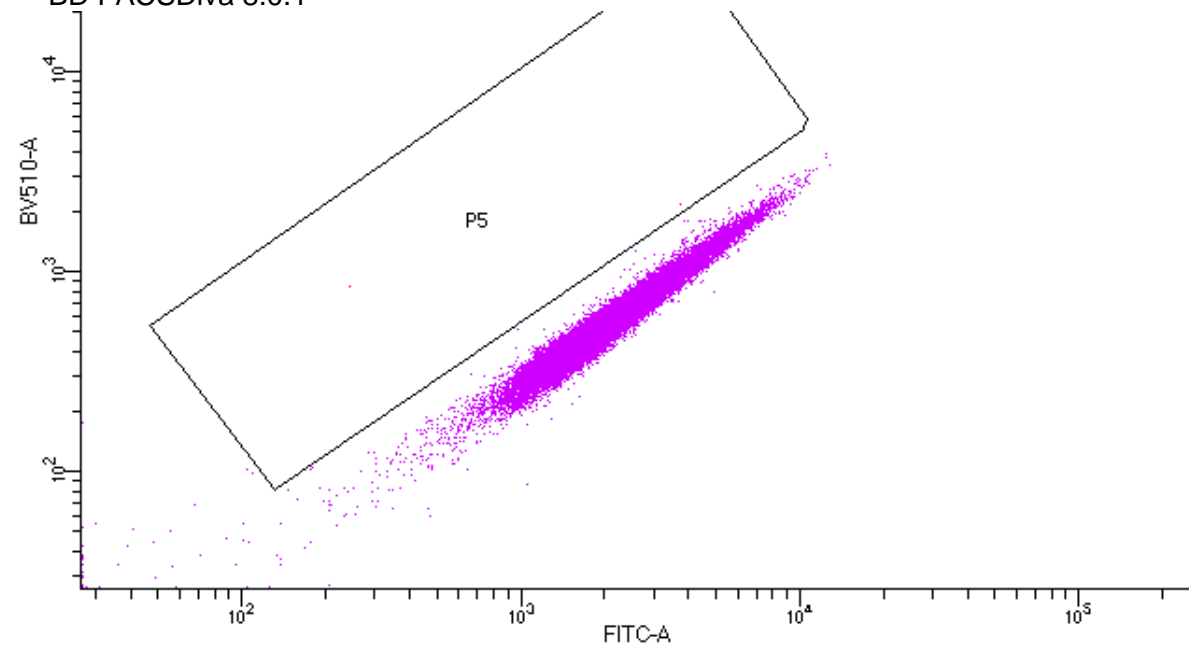

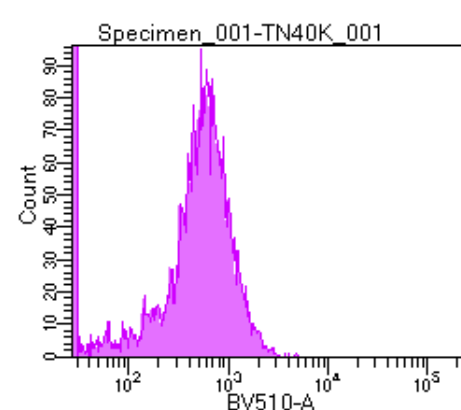

| Population | #Events | %Parent | %Total |
|------------|---------|---------|--------|
| All Events | 5,490   | ####    | 100.0  |
| P1         | 4,800   | 87.4    | 87.4   |
| P2         | 4,560   | 95.0    | 83.1   |
| P3         | 3,874   | 85.0    | 70.6   |
| P4         | 3,731   | 96.3    | 68.0   |
| P5         | 272     | 7.3     | 5.0    |

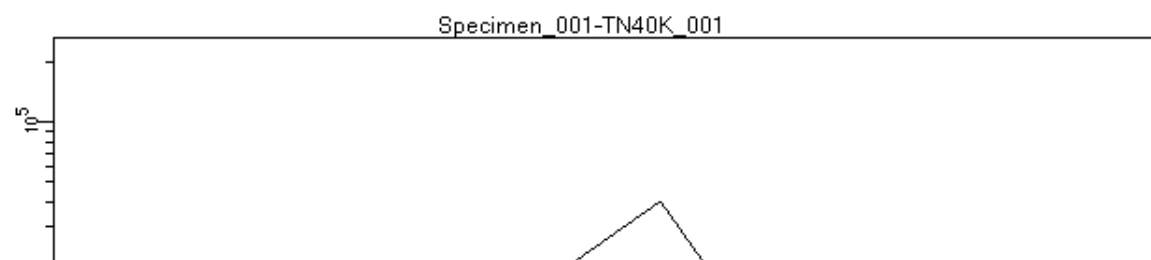



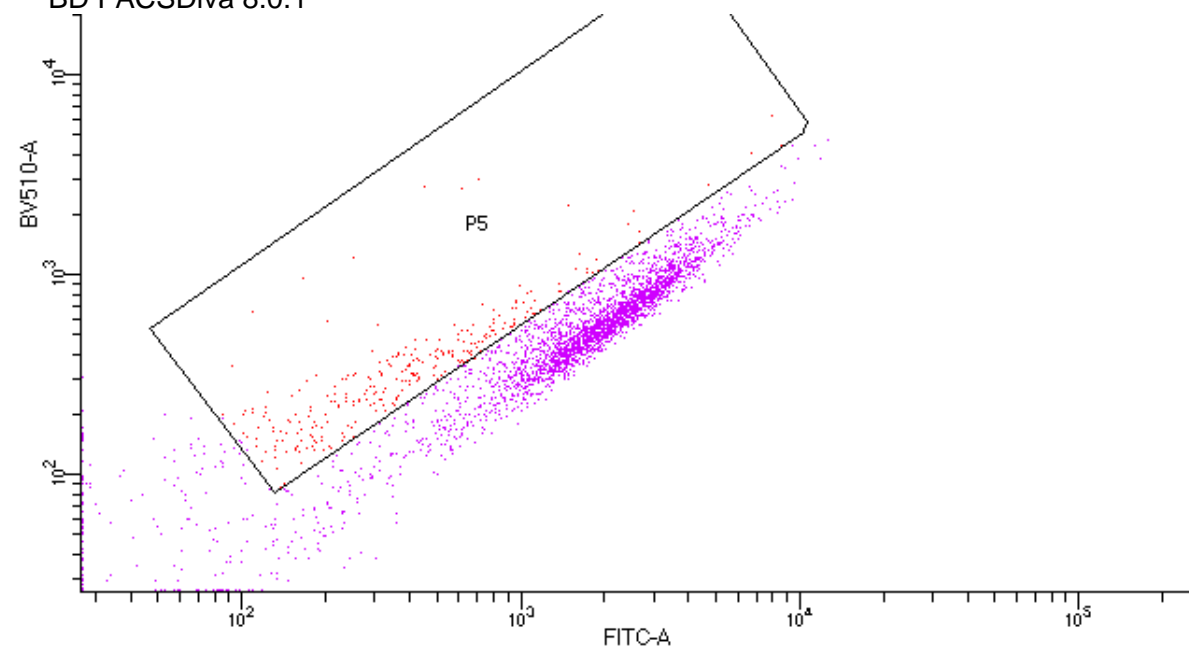

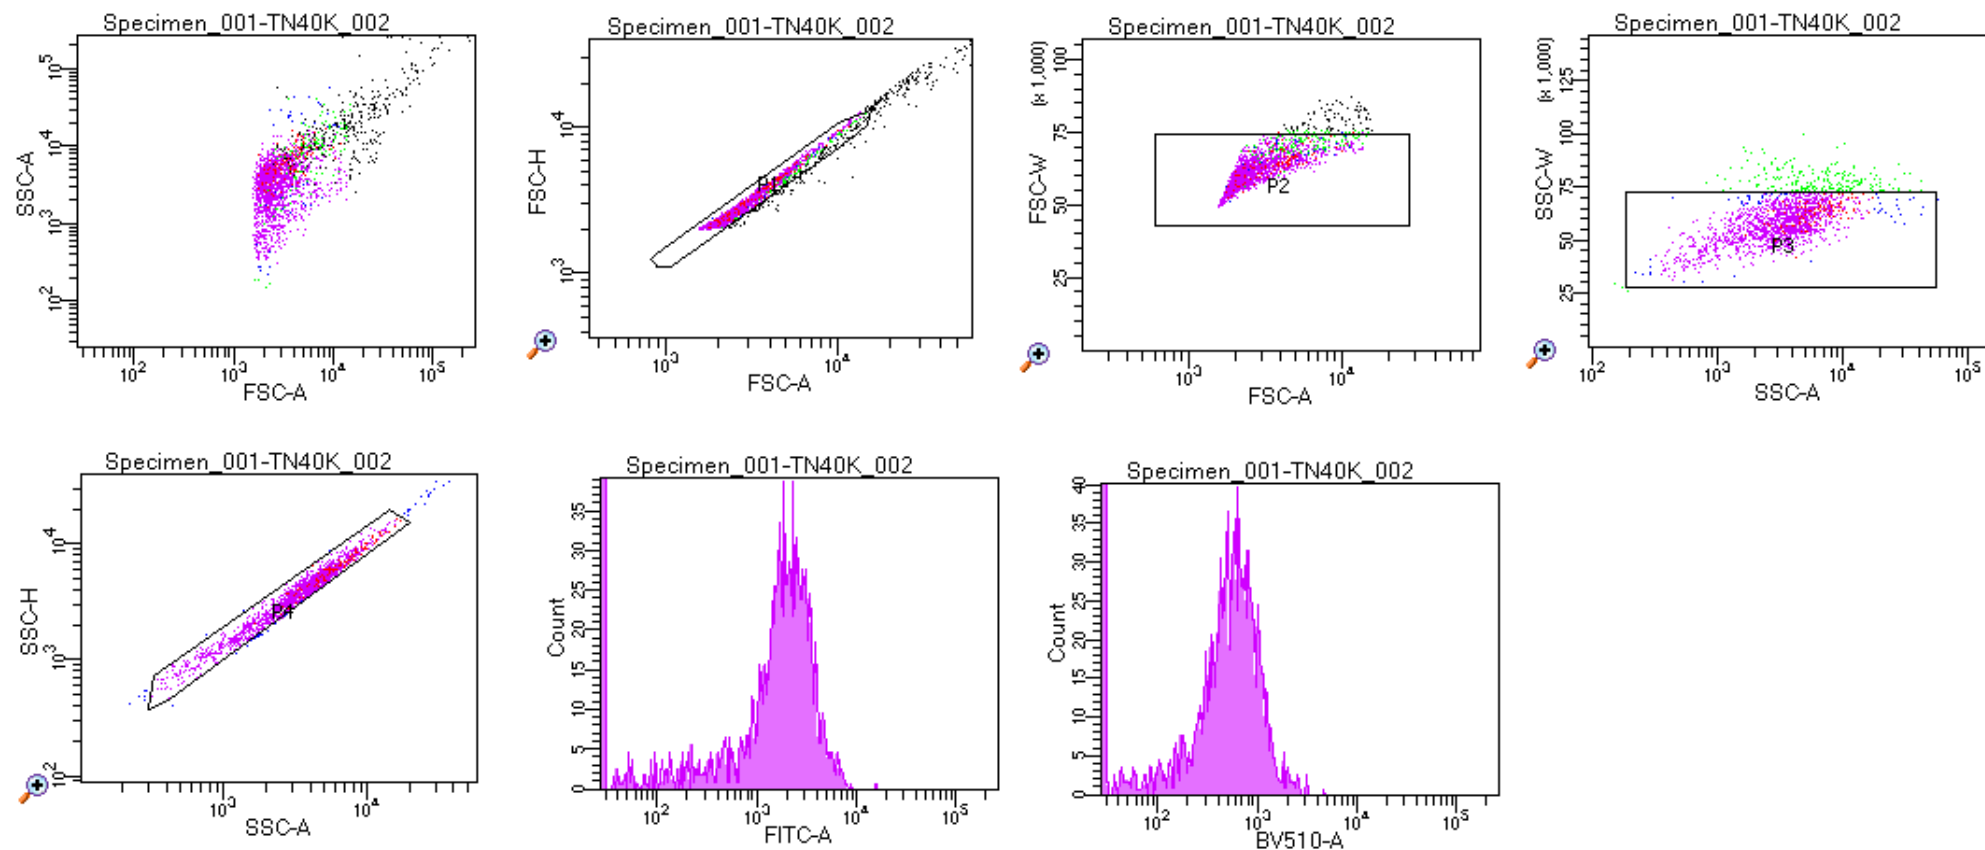

|                  |                               |
|------------------|-------------------------------|
| Experiment Name: | 02Feb2016 Bact Sorting        |
| Specimen Name:   | Specimen_001                  |
| Tube Name:       | TN40K_002                     |
| Record Date:     | Feb 2, 2016 3:01:53 PM        |
| SOP:             | Administrator                 |
| GUID:            | e7ed7dbe-4a26-4374-8e8a-da... |

  

| Population | #Events | %Parent | FITC-A<br>Median | BV510-A<br>Median |
|------------|---------|---------|------------------|-------------------|
| All Events | 2,075   | ####    | 1,662            | 529               |
| P1         | 1,816   | 87.5    | 1,592            | 498               |
| P2         | 1,739   | 95.8    | 1,560            | 480               |
| P3         | 1,521   | 87.5    | 1,504            | 450               |
| P4         | 1,459   | 95.9    | 1,531            | 454               |
| P5         | 97      | 6.6     | 325              | 318               |

| Tube: TN40K_002 |         |         |        |
|-----------------|---------|---------|--------|
| Population      | #Events | %Parent | %Total |
| All Events      | 2,075   | ####    | 100.0  |
| P1              | 1,816   | 87.5    | 87.5   |
| P2              | 1,739   | 95.8    | 83.8   |
| P3              | 1,521   | 87.5    | 73.3   |
| P4              | 1,459   | 95.9    | 70.3   |
| P5              | 97      | 6.6     | 4.7    |

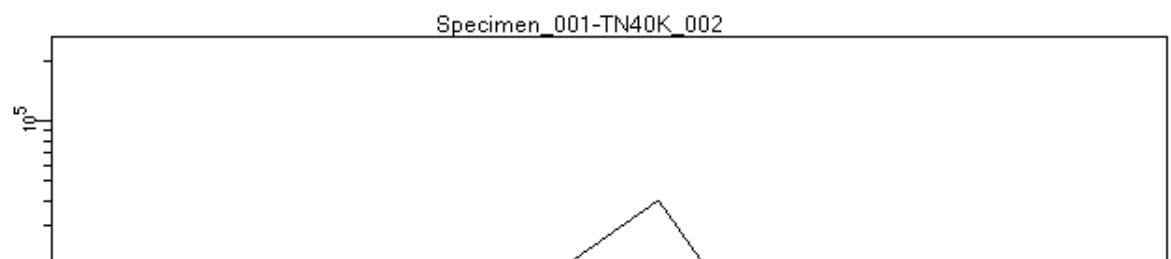

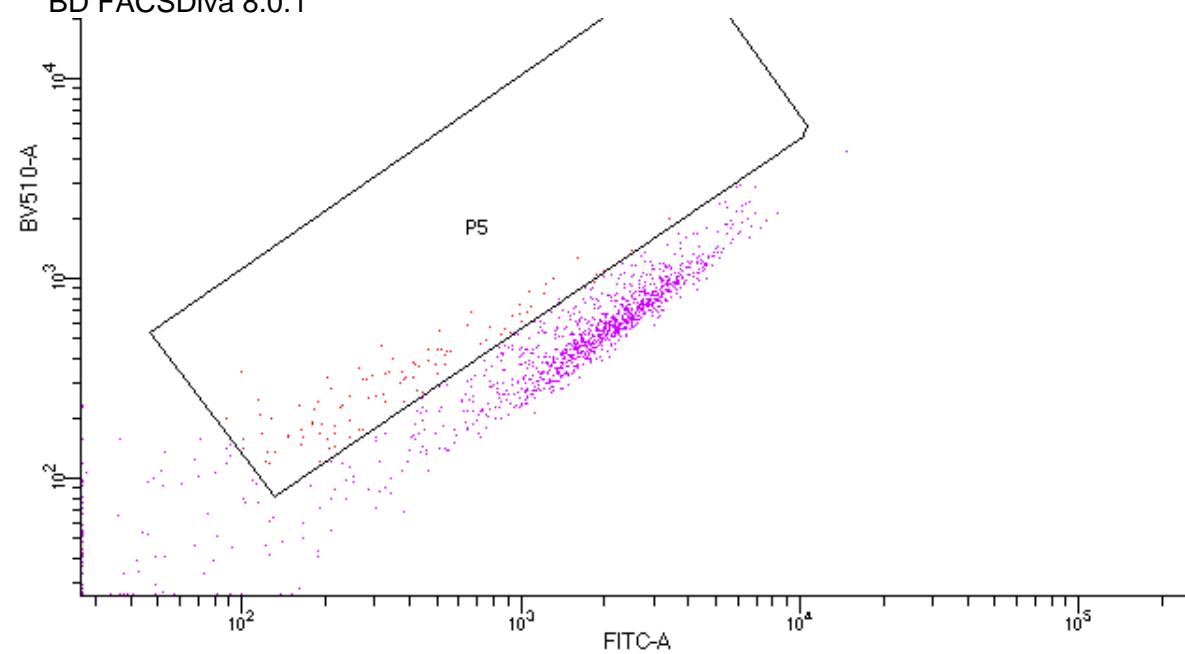

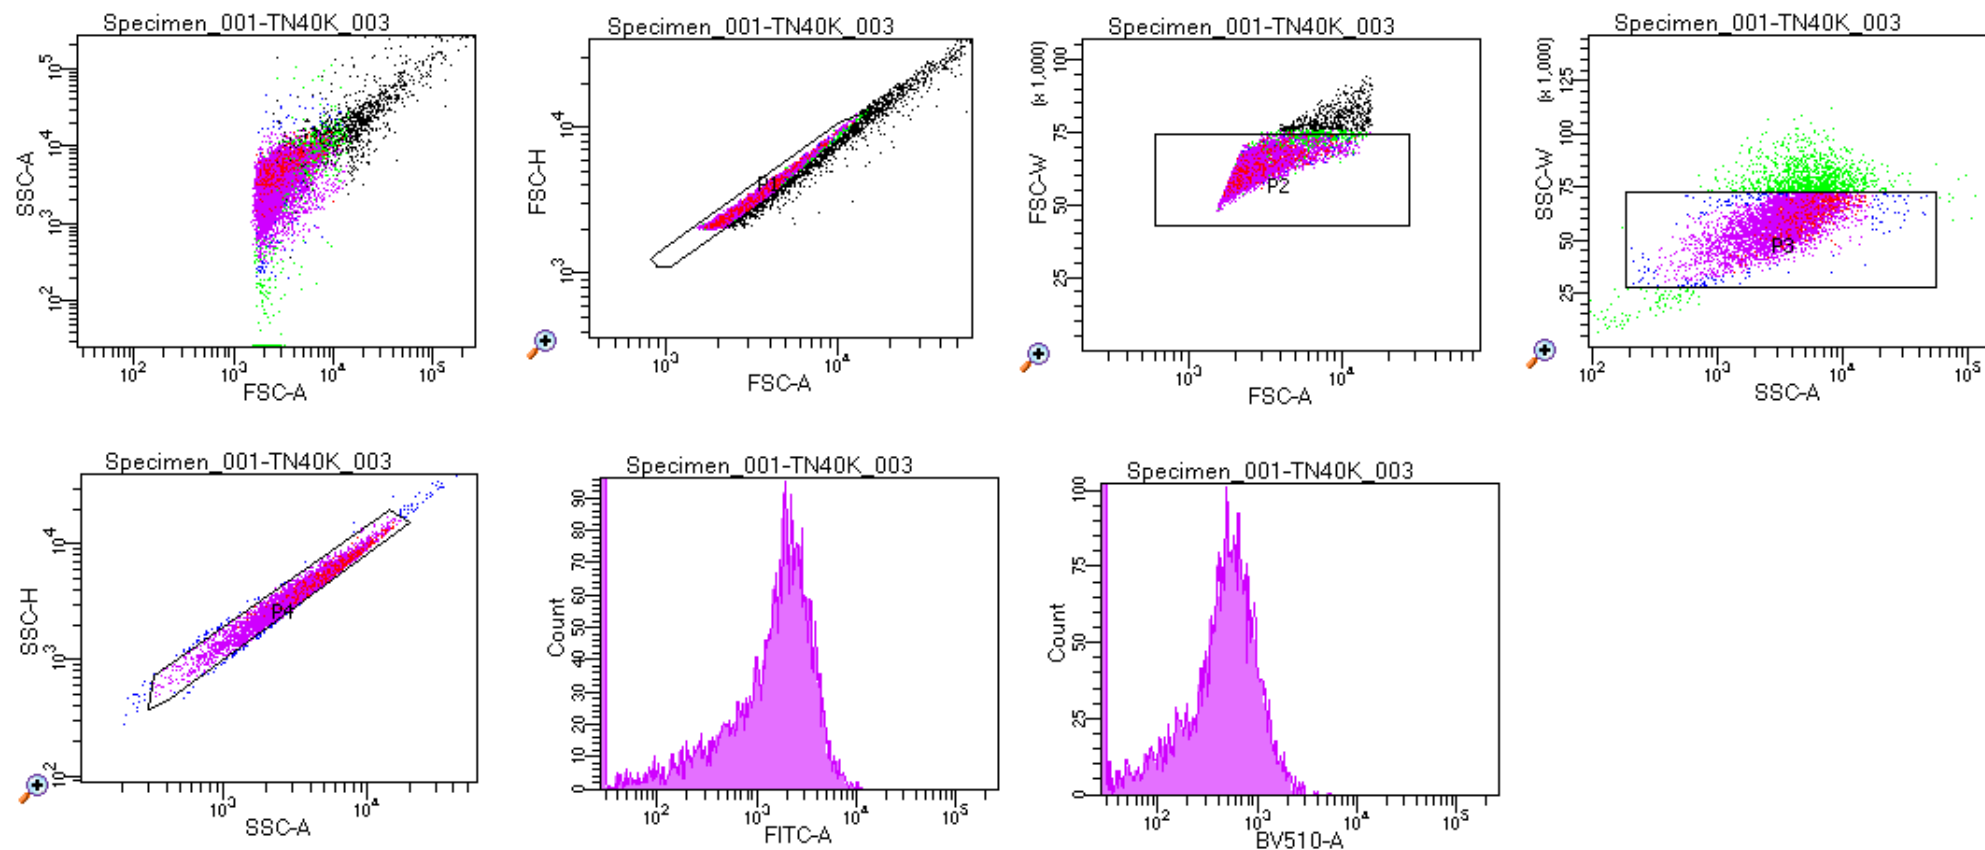

| Experiment Name: | 02Feb2016 Bact Sorting          |         |                  |                   |
|------------------|---------------------------------|---------|------------------|-------------------|
| Specimen Name:   | Specimen_001                    |         |                  |                   |
| Tube Name:       | TN40K_003                       |         |                  |                   |
| Record Date:     | Feb 2, 2016 3:19:44 PM          |         |                  |                   |
| \$OP:            | Administrator                   |         |                  |                   |
| GUID:            | 645e243a-8fd5-489e-821d-1df1... |         |                  |                   |
| Population       | #Events                         | %Parent | FITC-A<br>Median | BV510-A<br>Median |
| All Events       | 7,544                           | ####    | 1,518            | 464               |
| P1               | 6,496                           | 86.1    | 1,393            | 425               |
| P2               | 5,990                           | 92.2    | 1,347            | 407               |
| P3               | 4,694                           | 78.4    | 1,271            | 380               |
| P4               | 4,494                           | 95.7    | 1,274            | 383               |
| P5               | 272                             | 6.1     | 399              | 322               |

| Tube: TN40K_003 |         |         |        |
|-----------------|---------|---------|--------|
| Population      | #Events | %Parent | %Total |
| All Events      | 7,544   | ####    | 100.0  |
| P1              | 6,496   | 86.1    | 86.1   |
| P2              | 5,990   | 92.2    | 79.4   |
| P3              | 4,694   | 78.4    | 62.2   |
| P4              | 4,494   | 95.7    | 59.6   |
| P5              | 272     | 6.1     | 3.6    |

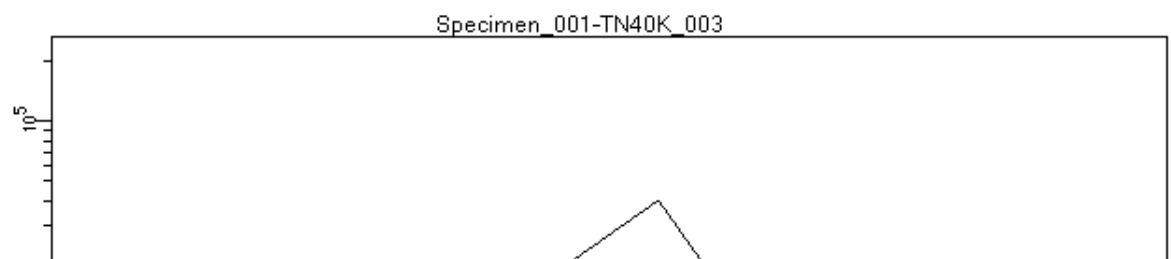

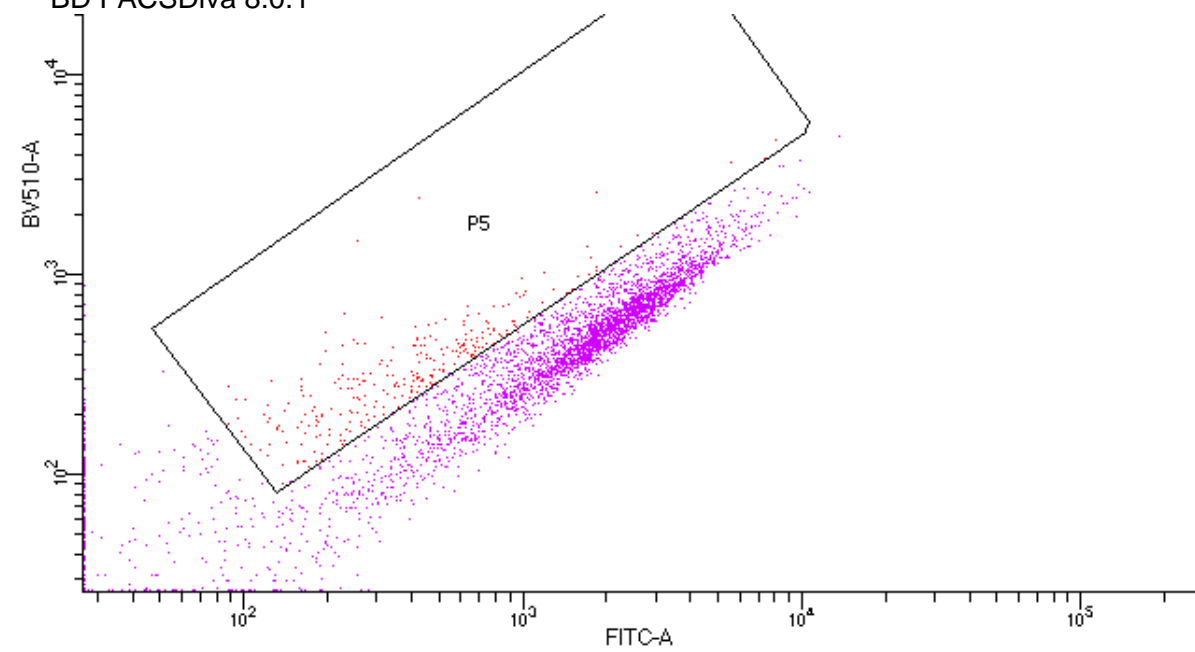

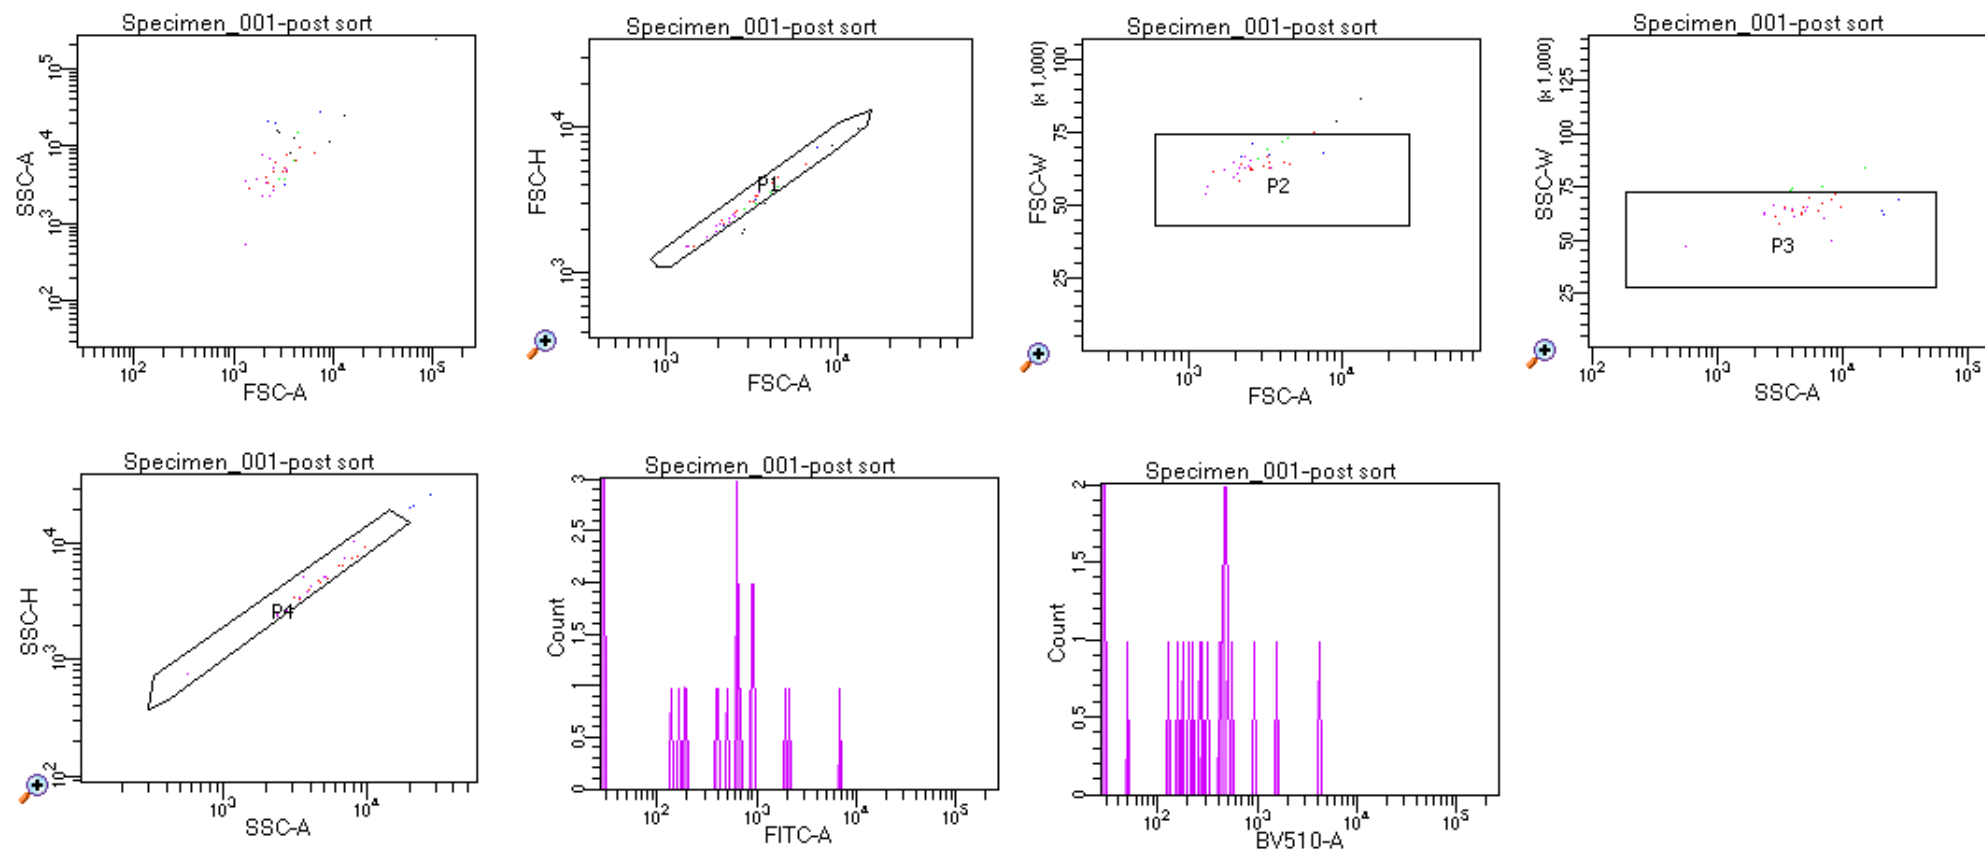

Experiment Name: 02Feb2016 Bact Sorting  
 Specimen Name: Specimen\_001  
 Tube Name: post sort  
 Record Date: Feb 2, 2016 3:41:21 PM  
 \$OP: Administrator  
 GUID: d93fe79e-0009-4c05-9bc0-8d6...

| Population | #Events | %Parent | FITC-A<br>Median | BV510-A<br>Median |
|------------|---------|---------|------------------|-------------------|
| All Events | 40      | ####    | 417              | 279               |
| P1         | 35      | 87.5    | 486              | 290               |
| P2         | 33      | 94.3    | 465              | 268               |
| P3         | 29      | 87.9    | 465              | 268               |
| P4         | 25      | 86.2    | 586              | 290               |
| P5         | 13      | 52.0    | 465              | 393               |

Tube: post sort

| Population | #Events | %Parent | %Total |
|------------|---------|---------|--------|
| All Events | 40      | ####    | 100.0  |
| P1         | 35      | 87.5    | 87.5   |
| P2         | 33      | 94.3    | 82.5   |
| P3         | 29      | 87.9    | 72.5   |
| P4         | 25      | 86.2    | 62.5   |
| P5         | 13      | 52.0    | 32.5   |

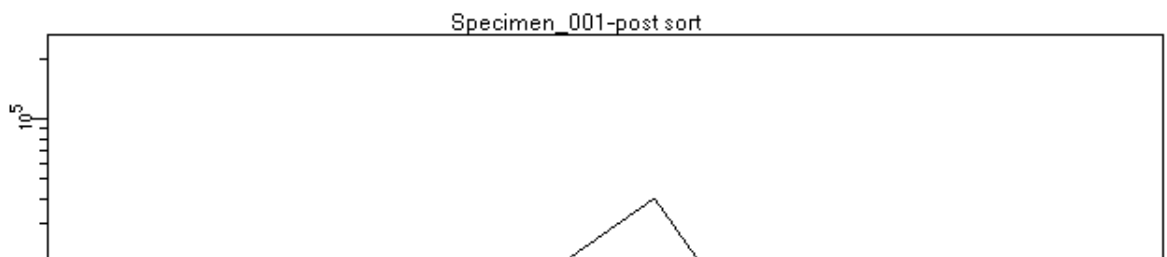

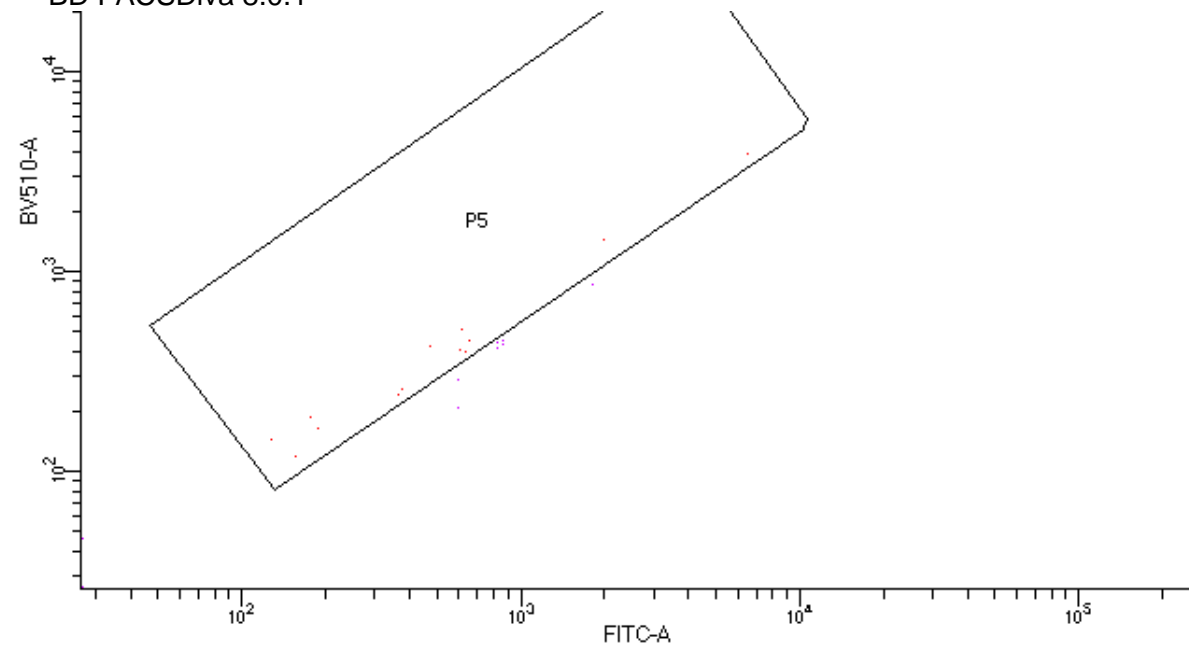

Supplement: supp [file elife-80218-supp-v1.zip]
