# Supplementary material for: Biosensor-integrated transposon mutagenesis reveals rv0158 as a coordinator of redox homeostasis in Mycobacterium tuberculosis
Source: eLife journal article supplement (doi:10.7554/elife.80218), 2023-08-29

# Batch Analysis Report

Run Date: 3/20/17 3:03 PM

Experiment: 09Mar2017 Bac\_001

User ID: Administrator

Statistics Output: C:\Users\Admin\Desktop\09Mar2017 Bac\_001-Batch\_Analysis\_20032017150335.csv

Worksheet PDF Output: C:\Users\Admin\Desktop\09Mar2017 Bac\_001-Batch\_Analysis\_20032017150335.pdf

## RVMrx1

| Tube       | Status | Run Time        |
|------------|--------|-----------------|
| US         | OK     | 3/20/17 3:03 PM |
| RVMrx1     | OK     | 3/20/17 3:03 PM |
| RVMrx1_001 | OK     | 3/20/17 3:03 PM |
| TNlib R2   | OK     | 3/20/17 3:03 PM |
| post sort  | OK     | 3/20/17 3:03 PM |
| chp1       | OK     | 3/20/17 3:03 PM |
| chp1_001   | OK     | 3/20/17 3:03 PM |
| dt1        | OK     | 3/20/17 3:03 PM |
| dt1_001    | OK     | 3/20/17 3:03 PM |

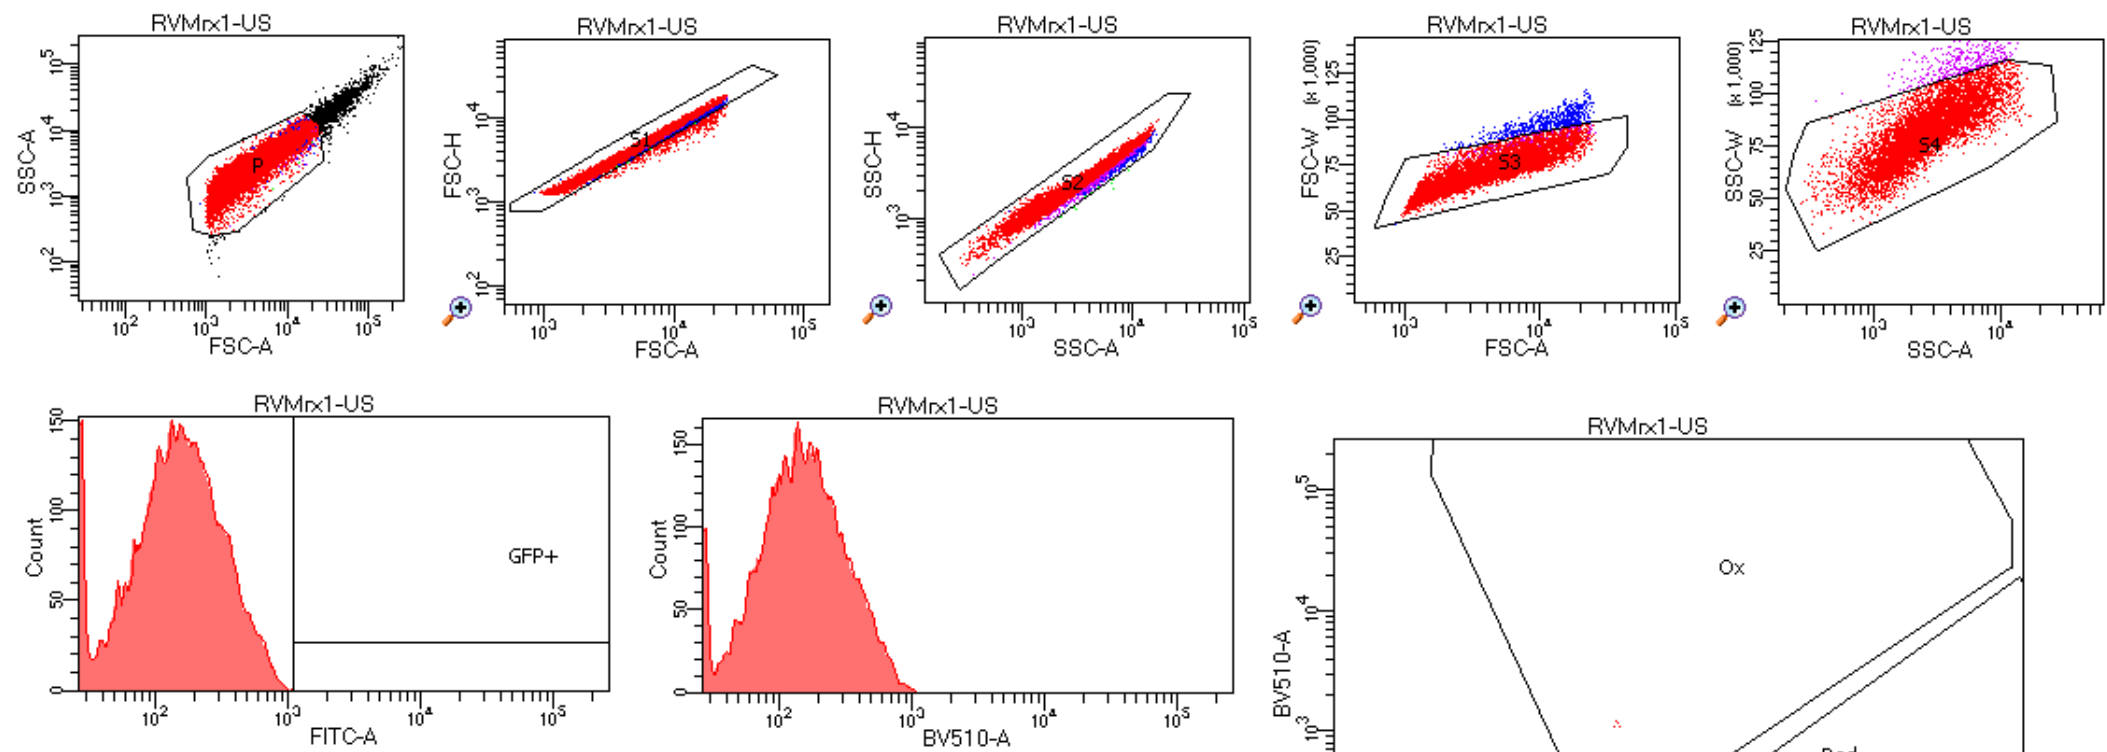

Tube: US

| Population | #Events | %Parent | %Total |
|------------|---------|---------|--------|
| All Events | 10,952  | ####    | 100.0  |
| P          | 9,462   | 86.4    | 86.4   |
| S1         | 8,838   | 93.4    | 80.7   |
| S2         | 8,819   | 99.8    | 80.5   |
| S3         | 8,175   | 92.7    | 74.6   |
| S4         | 7,803   | 95.4    | 71.2   |
| GFP+       | 4       | 0.1     | 0.0    |
| Ox         | 4       | 100.0   | 0.0    |
| Red        | 0       | 0.0     | 0.0    |

| Experiment Name: | 09Mar2017 Bac_001                  |         |               |                |
|------------------|------------------------------------|---------|---------------|----------------|
| Specimen Name:   | RVMrx1                             |         |               |                |
| Tube Name:       | US                                 |         |               |                |
| Record Date:     | Mar 20, 2017 10:23:00 AM           |         |               |                |
| SOP:             | Administrator                      |         |               |                |
| GUID:            | 787426f1-3435-4d5b-9b72-df6cb91... |         |               |                |
| Population       | #Events                            | %Parent | FITC-A Median | BV510-A Median |
| S4               | 7,803                              | 95.4    | 146           | 143            |
| GFP+             | 4                                  | 0.1     | 1,149         | 1,128          |
| Ox               | 4                                  | 100.0   | 1,149         | 1,128          |
| Red              | 0                                  | 0.0     | ####          | ####           |

RVMx1-US

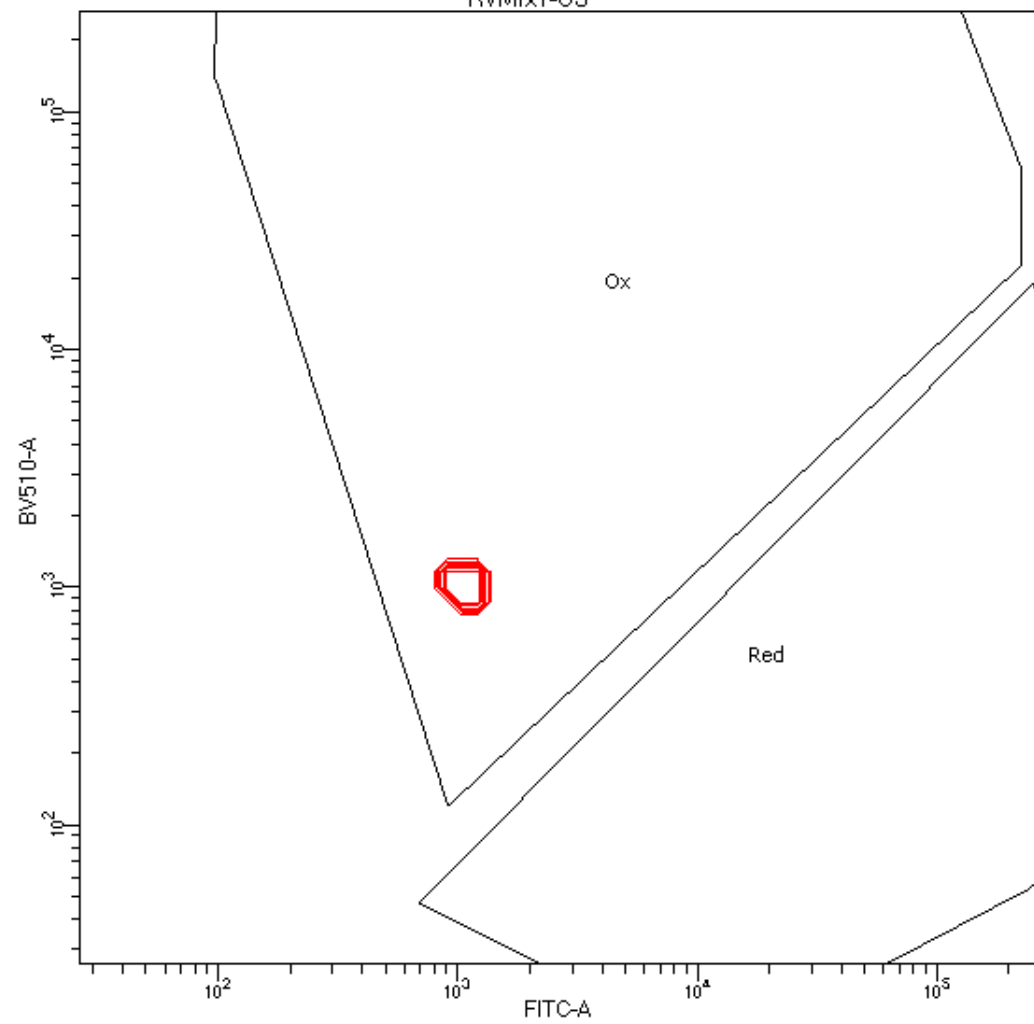

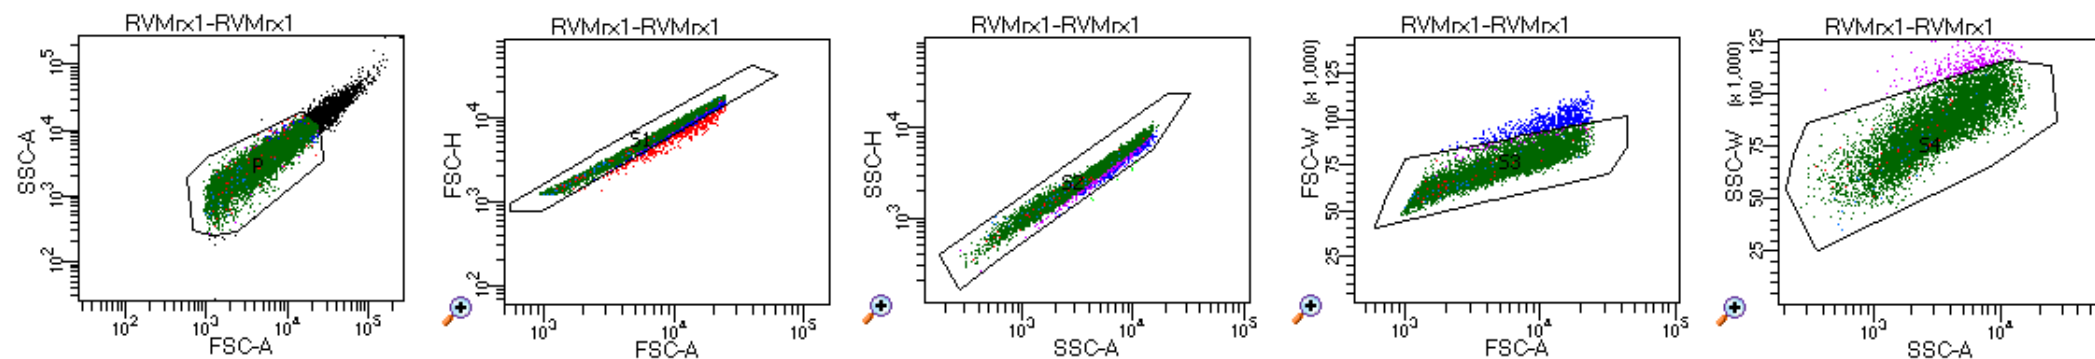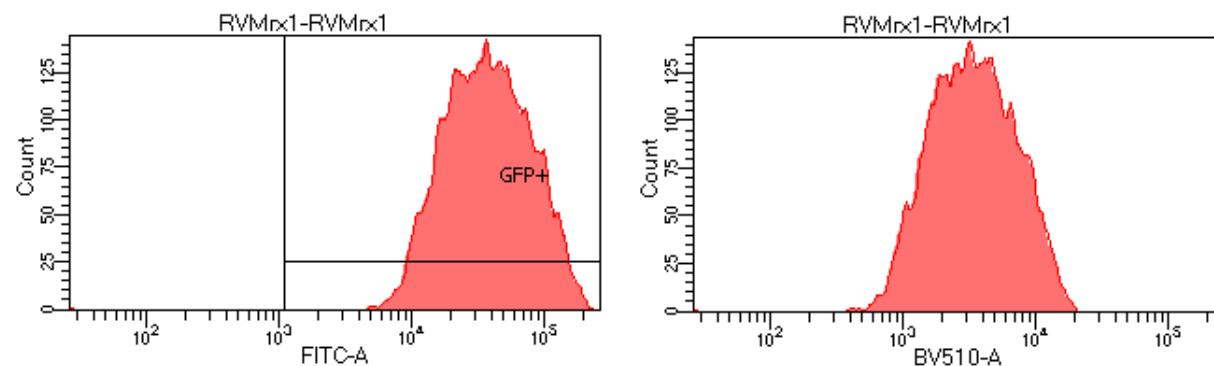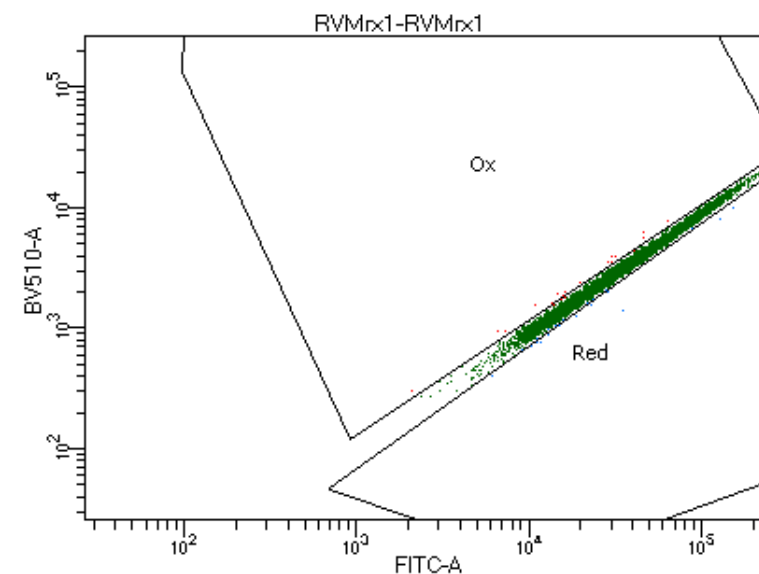

Tube: RVMrx1

| Population | #Events | %Parent | %Total |
|------------|---------|---------|--------|
| All Events | 10,974  | ####    | 100.0  |
| P          | 9,240   | 84.2    | 84.2   |
| S1         | 8,815   | 95.4    | 80.3   |
| S2         | 8,803   | 99.9    | 80.2   |
| S3         | 8,178   | 92.9    | 74.5   |
| S4         | 7,861   | 96.1    | 71.6   |
| GFP+       | 7,835   | 99.7    | 71.4   |
| Ox         | 31      | 0.4     | 0.3    |
| Red        | 32      | 0.4     | 0.3    |

Experiment Name: 09Mar2017 Bac\_001  
 Specimen Name: RVMrx1  
 Tube Name: RVMrx1  
 Record Date: Mar 20, 2017 10:23:38 AM  
 SOP: Administrator  
 GUID: 1cab095d-0d4f-434f-98da-b3612d1...

| Population | #Events | %Parent | FITC-A<br>Median | BV510-A<br>Median |
|------------|---------|---------|------------------|-------------------|
| S4         | 7,861   | 96.1    | 35,461           | 3,193             |
| GFP+       | 7,835   | 99.7    | 35,615           | 3,200             |
| Ox         | 31      | 0.4     | 28,478           | 3,611             |
| Red        | 32      | 0.4     | 15,303           | 1,115             |

RVMrx1-RVMrx1

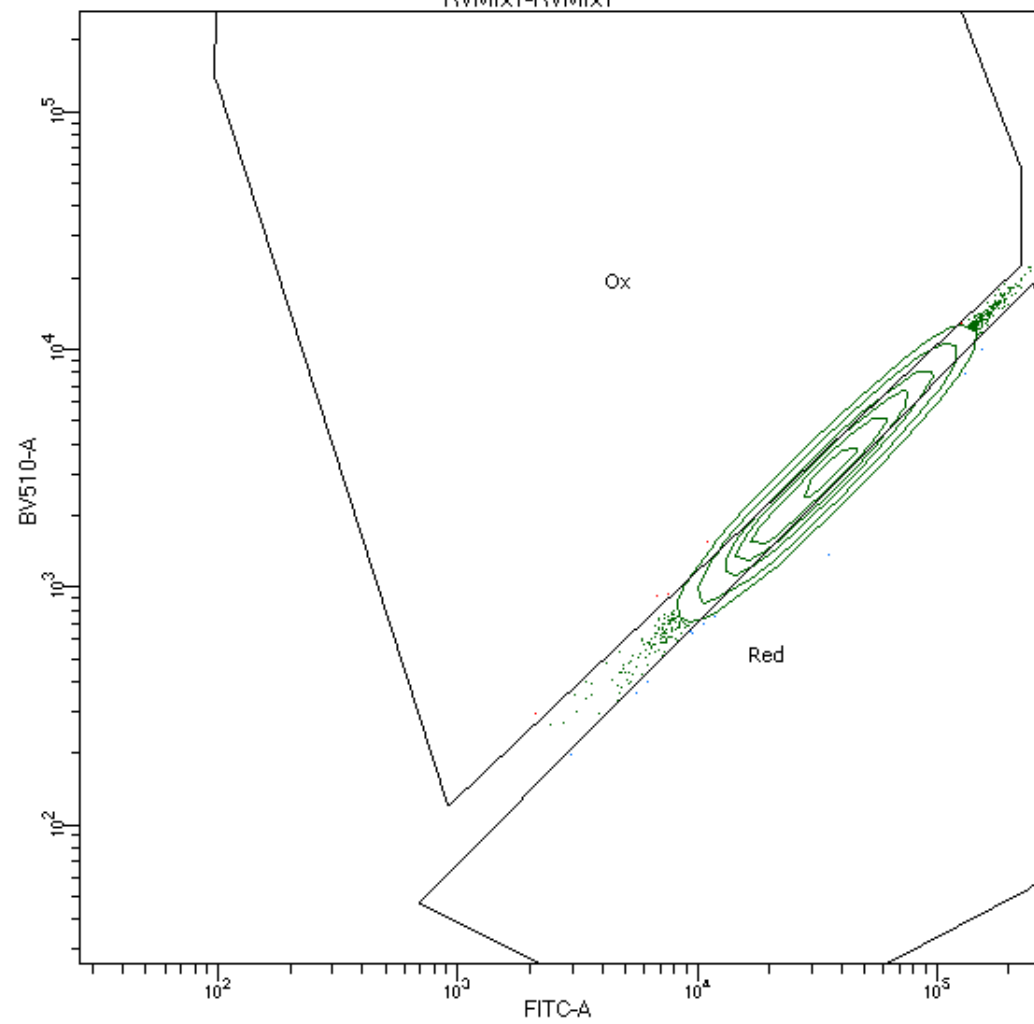

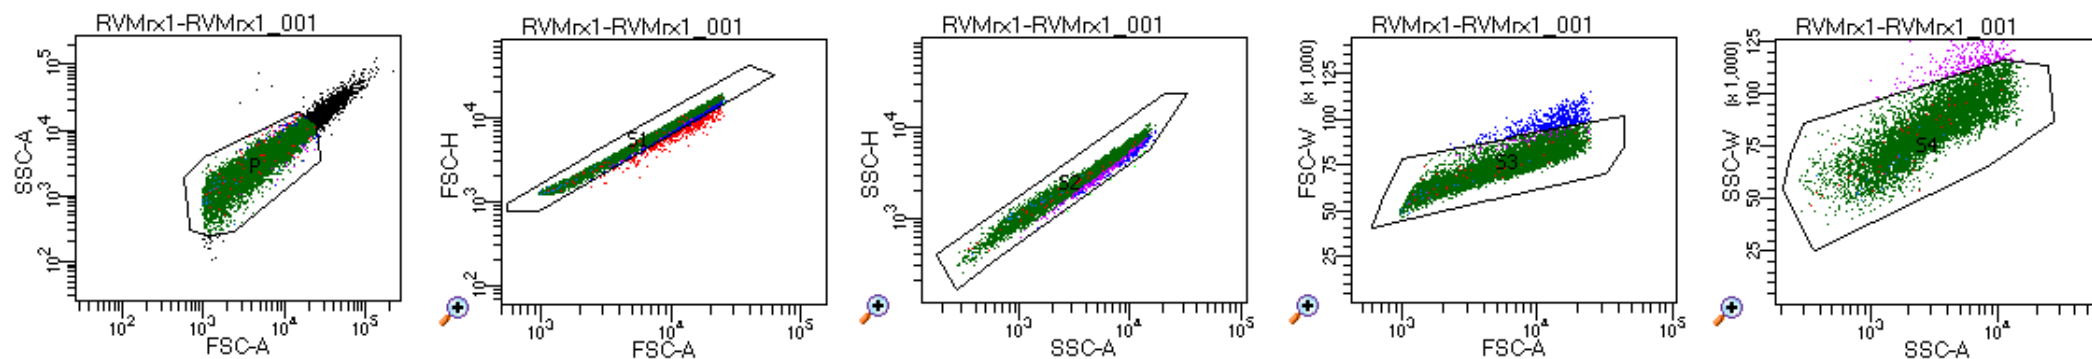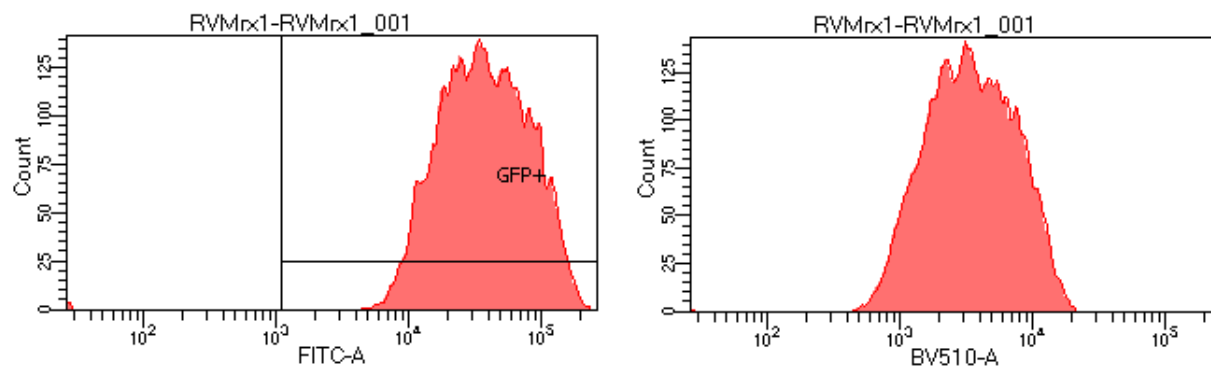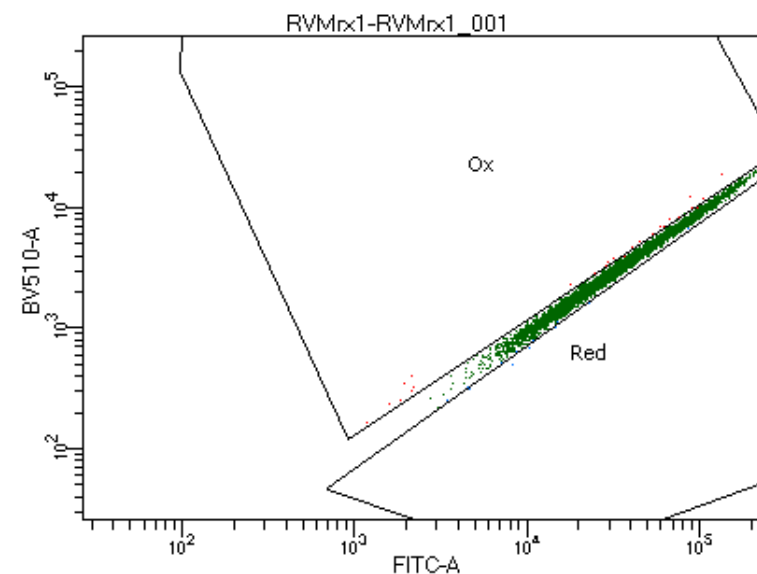

Tube: RVMrx1\_001

| Population | #Events | %Parent | %Total |
|------------|---------|---------|--------|
| All Events | 10,927  | ####    | 100.0  |
| P          | 9,328   | 85.4    | 85.4   |
| S1         | 8,957   | 96.0    | 82.0   |
| S2         | 8,948   | 99.9    | 81.9   |
| S3         | 8,382   | 93.7    | 76.7   |
| S4         | 8,080   | 96.4    | 73.9   |
| GFP+       | 8,046   | 99.6    | 73.6   |
| Ox         | 30      | 0.4     | 0.3    |
| Red        | 17      | 0.2     | 0.2    |

Experiment Name: 09Mar2017 Bac\_001  
 Specimen Name: RVMrx1  
 Tube Name: RVMrx1\_001  
 Record Date: Mar 20, 2017 10:24:16 AM  
 SOP: Administrator  
 GUID: 452fdc5f-2402-47fc-b5b8-b2d4708a...

| Population | #Events | %Parent | FITC-A<br>Median | BV510-A<br>Median |
|------------|---------|---------|------------------|-------------------|
| S4         | 8,080   | 96.4    | 35,518           | 3,236             |
| GFP+       | 8,046   | 99.6    | 35,683           | 3,256             |
| Ox         | 30      | 0.4     | 37,058           | 4,016             |
| Red        | 17      | 0.2     | 10,318           | 696               |

RVMrx1-RVMrx1\_001

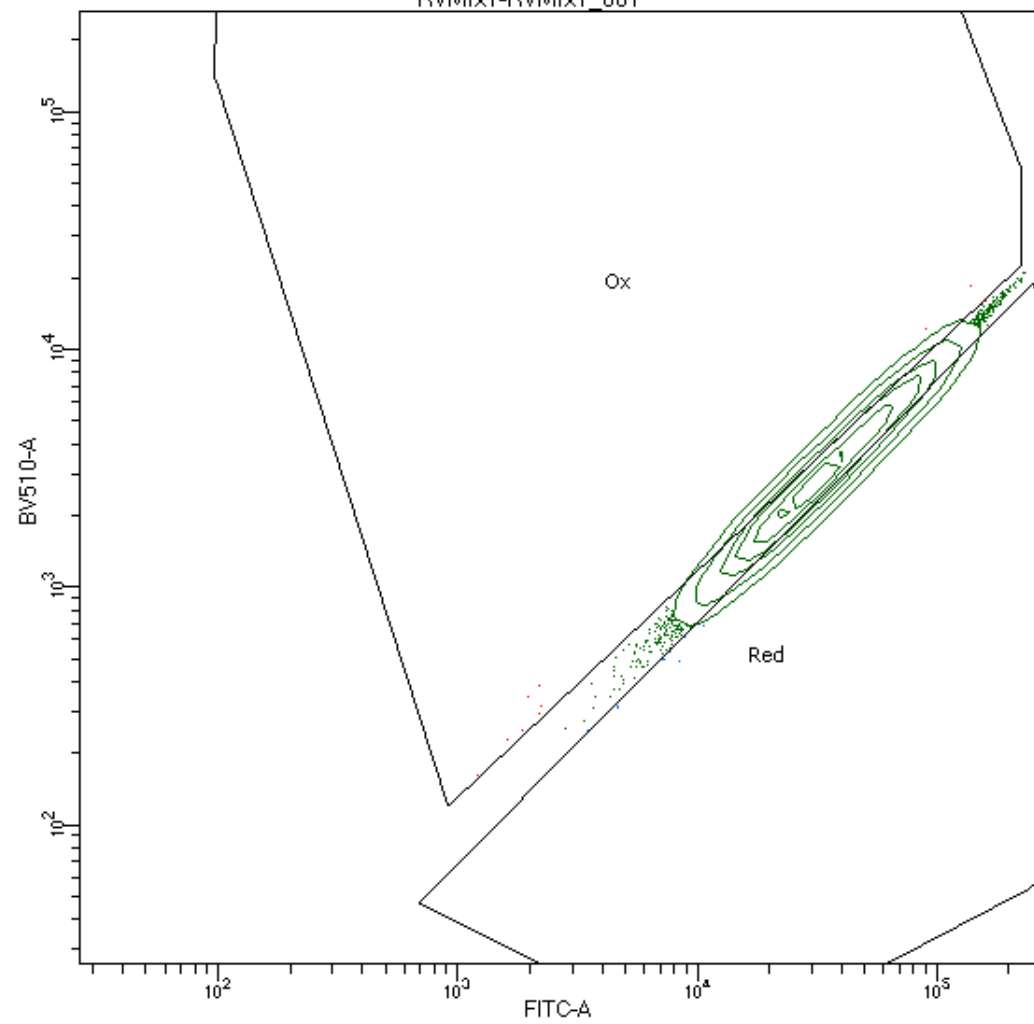

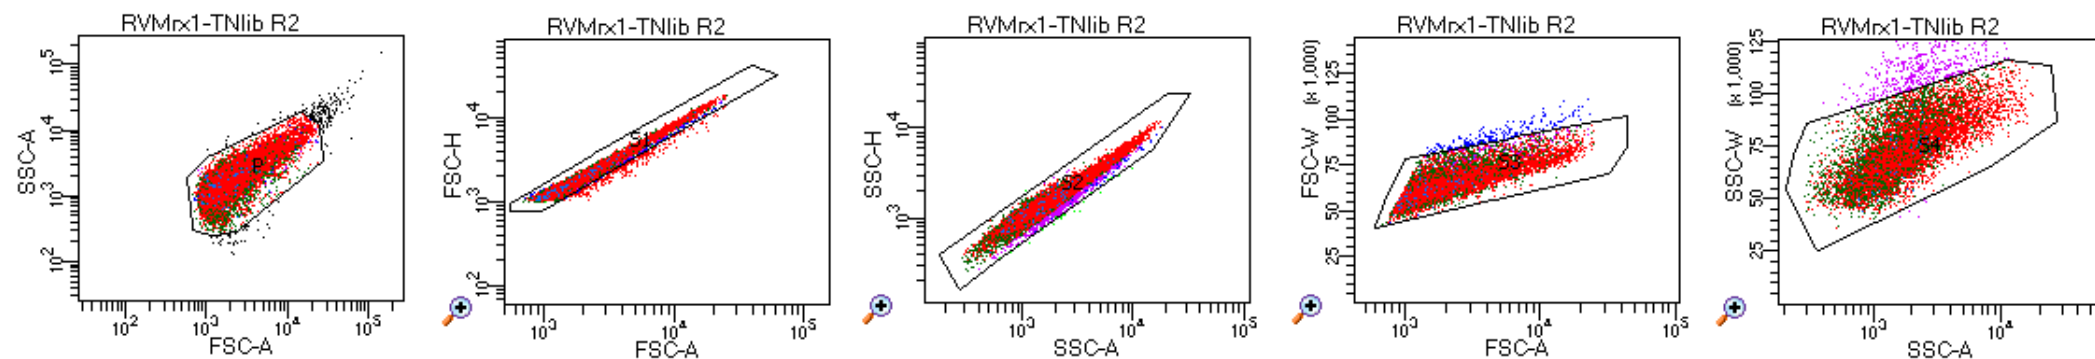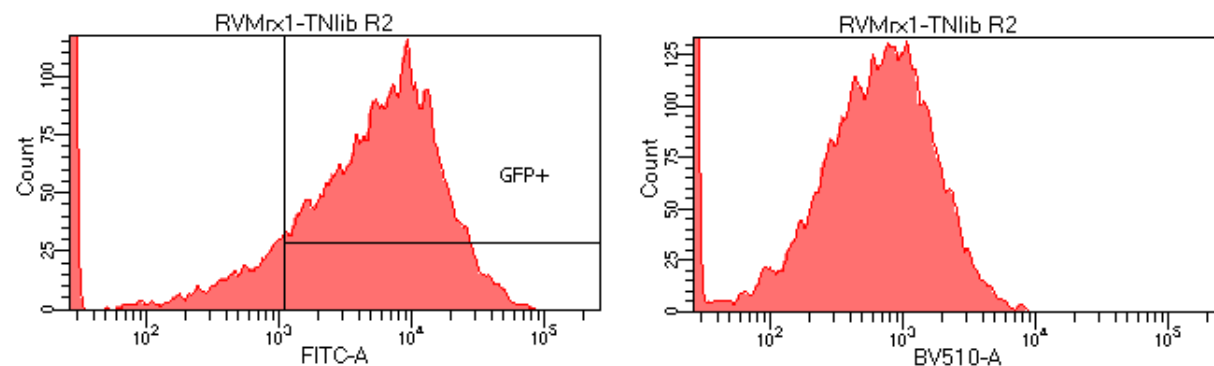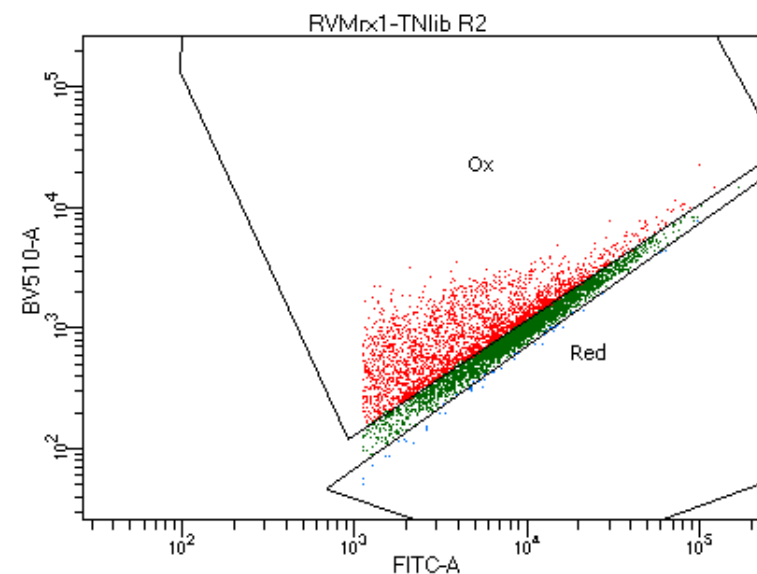

Tube: TNlib R2

| Population | #Events | %Parent | %Total |
|------------|---------|---------|--------|
| All Events | 10,218  | ####    | 100.0  |
| P          | 10,000  | 97.9    | 97.9   |
| S1         | 9,686   | 96.9    | 94.8   |
| S2         | 9,647   | 99.6    | 94.4   |
| S3         | 9,444   | 97.9    | 92.4   |
| S4         | 9,003   | 95.3    | 88.1   |
| GFP+       | 6,403   | 71.1    | 62.7   |
| Ox         | 2,541   | 39.7    | 24.9   |
| Red        | 70      | 1.1     | 0.7    |

Experiment Name: 09Mar2017 Bac\_001  
 Specimen Name: RVMrx1  
 Tube Name: TNlib R2  
 Record Date: Mar 20, 2017 12:52:13 PM  
 SOP: Administrator  
 GUID: 5c60819e-6c23-47ff-8931-37bb869...

| Population | #Events | %Parent | FITC-A<br>Median | BV510-A<br>Median |
|------------|---------|---------|------------------|-------------------|
| S4         | 9,003   | 95.3    | 3,962            | 617               |
| GFP+       | 6,403   | 71.1    | 6,849            | 871               |
| Ox         | 2,541   | 39.7    | 3,989            | 905               |
| Red        | 70      | 1.1     | 6,262            | 433               |



RVMx1-TNlib R2

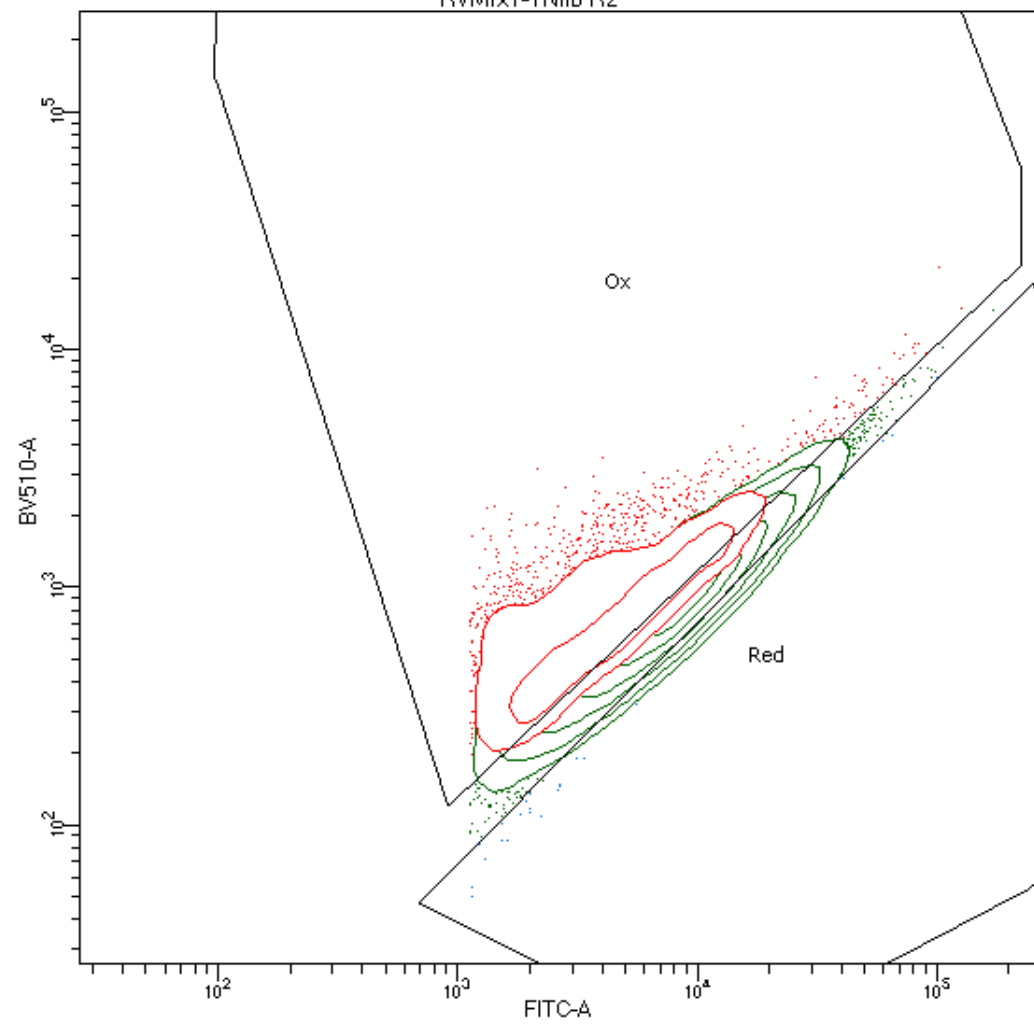

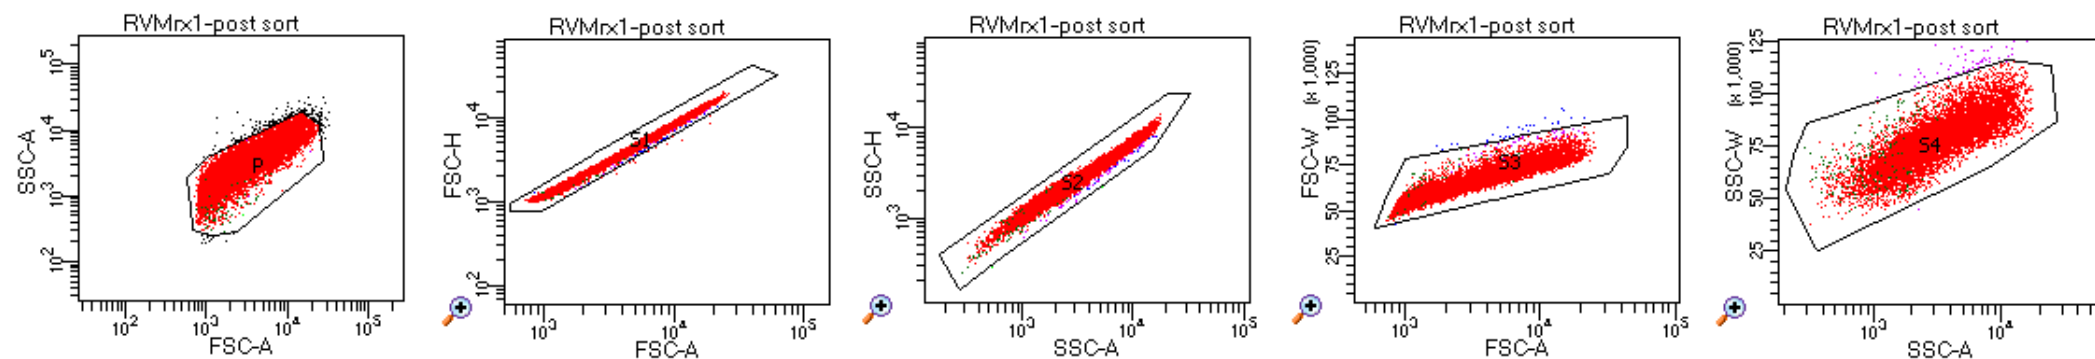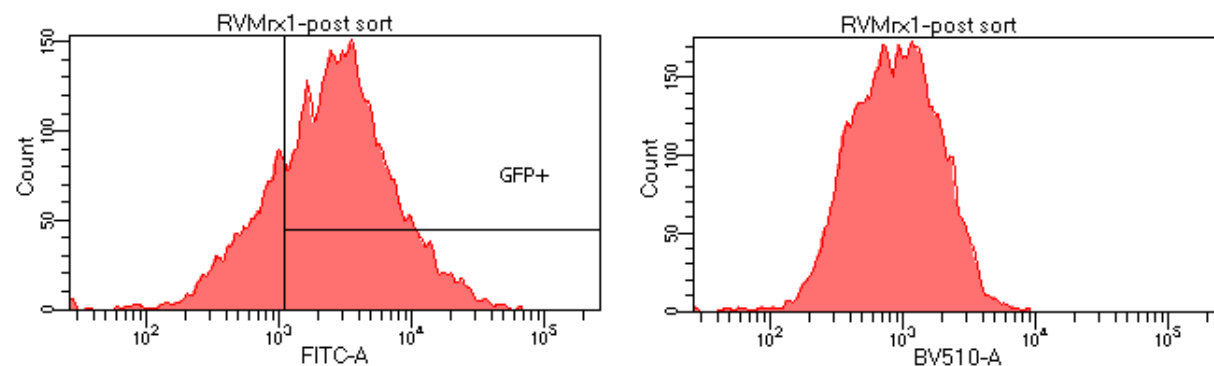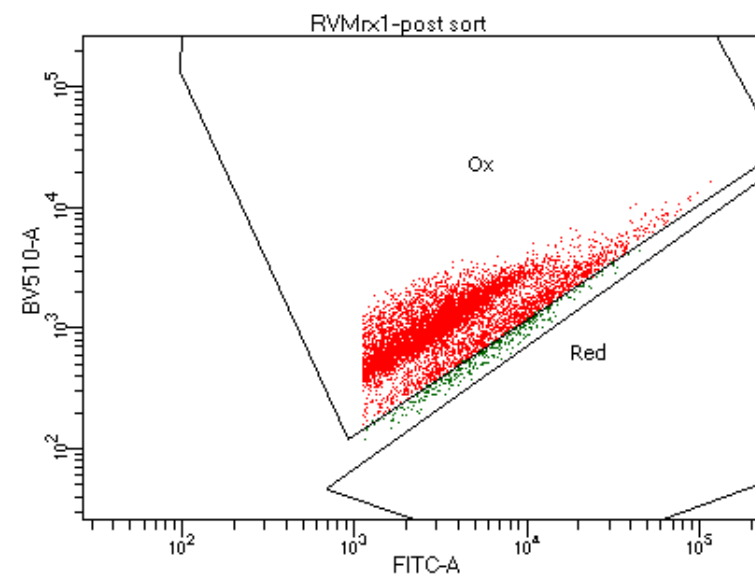

Tube: post sort

| Population | #Events | %Parent | %Total |
|------------|---------|---------|--------|
| All Events | 10,195  | ####    | 100.0  |
| P          | 10,000  | 98.1    | 98.1   |
| S1         | 9,981   | 99.8    | 97.9   |
| S2         | 9,979   | 100.0   | 97.9   |
| S3         | 9,945   | 99.7    | 97.5   |
| S4         | 9,877   | 99.3    | 96.9   |
| GFP+       | 7,508   | 76.0    | 73.6   |
| Ox         | 7,095   | 94.5    | 69.6   |
| Red        | 0       | 0.0     | 0.0    |

Experiment Name: 09Mar2017 Bac\_001  
 Specimen Name: RVMrx1  
 Tube Name: post sort  
 Record Date: Mar 20, 2017 2:39:48 PM  
 SOP: Administrator  
 GUID: cb10e07c-d1d2-4262-aa87-db5552...

| Population | #Events | %Parent | FITC-A<br>Median | BV510-A<br>Median |
|------------|---------|---------|------------------|-------------------|
| S4         | 9,877   | 99.3    | 2,470            | 847               |
| GFP+       | 7,508   | 76.0    | 3,330            | 1,089             |
| Ox         | 7,095   | 94.5    | 3,232            | 1,116             |
| Red        | 0       | 0.0     | ####             | ####              |

RVMrx1-post sort

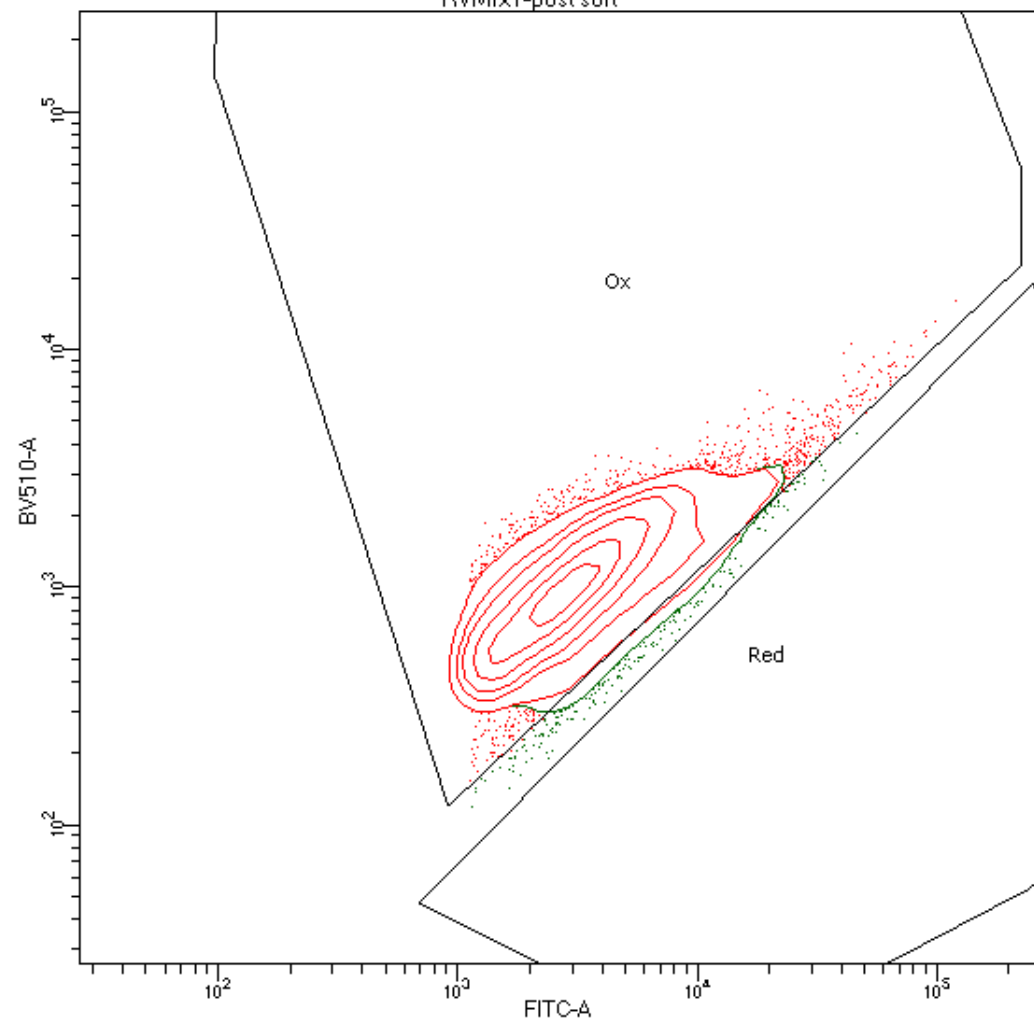

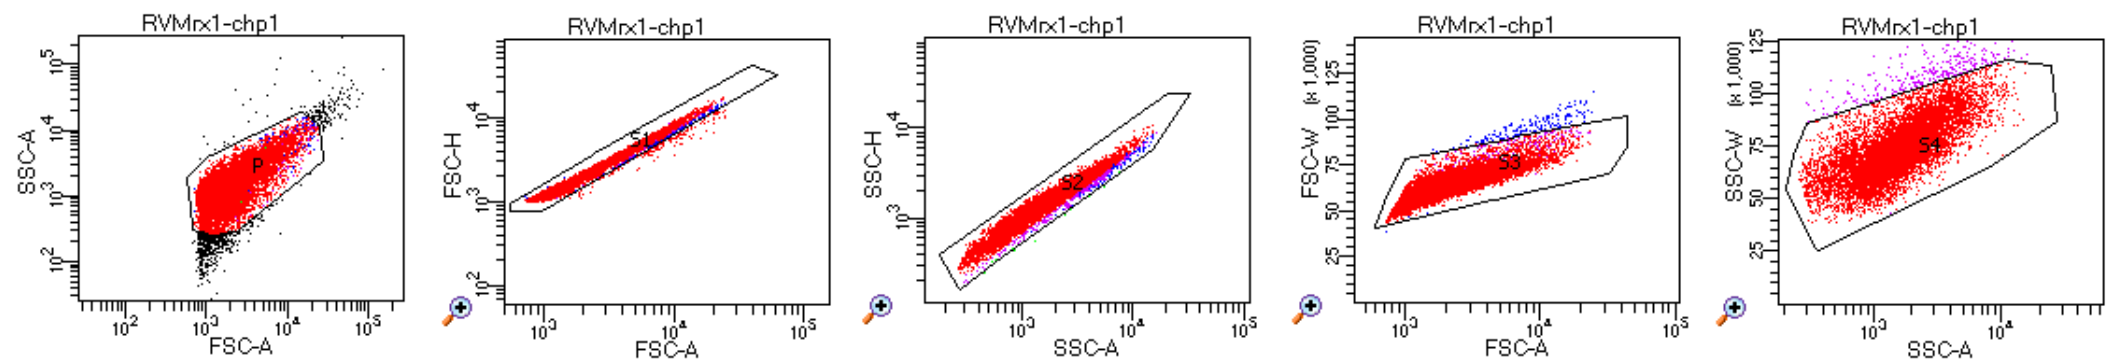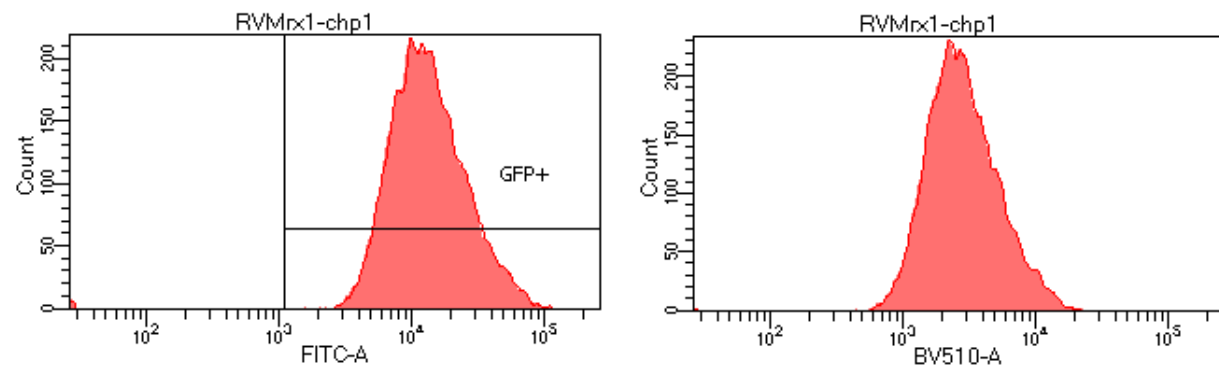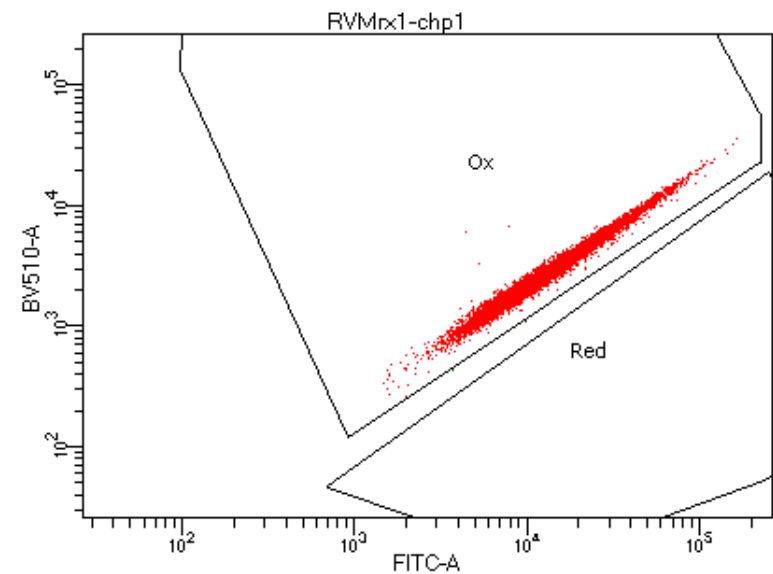

Tube: chp1

| Population | #Events | %Parent | %Total |
|------------|---------|---------|--------|
| All Events | 10,639  | ####    | 100.0  |
| P          | 10,000  | 94.0    | 94.0   |
| S1         | 9,843   | 98.4    | 92.5   |
| S2         | 9,827   | 99.8    | 92.4   |
| S3         | 9,646   | 98.2    | 90.7   |
| S4         | 9,337   | 96.8    | 87.8   |
| GFP+       | 9,306   | 99.7    | 87.5   |
| Ox         | 9,304   | 100.0   | 87.5   |
| Red        | 0       | 0.0     | 0.0    |

Experiment Name: 09Mar2017 Bac\_001  
 Specimen Name: RVMrx1  
 Tube Name: chp1  
 Record Date: Mar 20, 2017 2:40:58 PM  
 SOP: Administrator  
 GUID: 603a787e-4a19-483a-887f-3958de4...

| Population | #Events | %Parent | FITC-A<br>Median | BV510-A<br>Median |
|------------|---------|---------|------------------|-------------------|
| S4         | 9,337   | 96.8    | 12,324           | 2,603             |
| GFP+       | 9,306   | 99.7    | 12,350           | 2,606             |
| Ox         | 9,304   | 100.0   | 12,352           | 2,606             |
| Red        | 0       | 0.0     | ####             | ####              |

RVMrx1-chp1

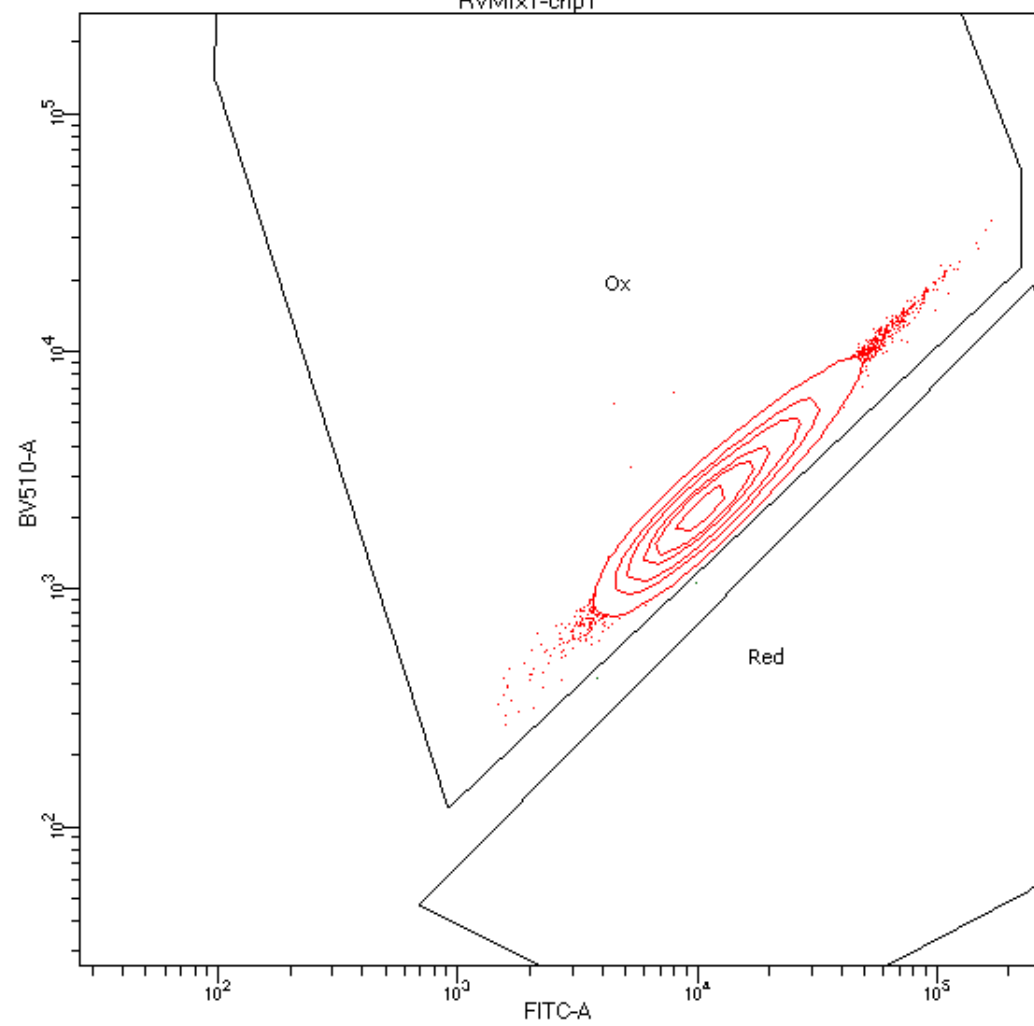

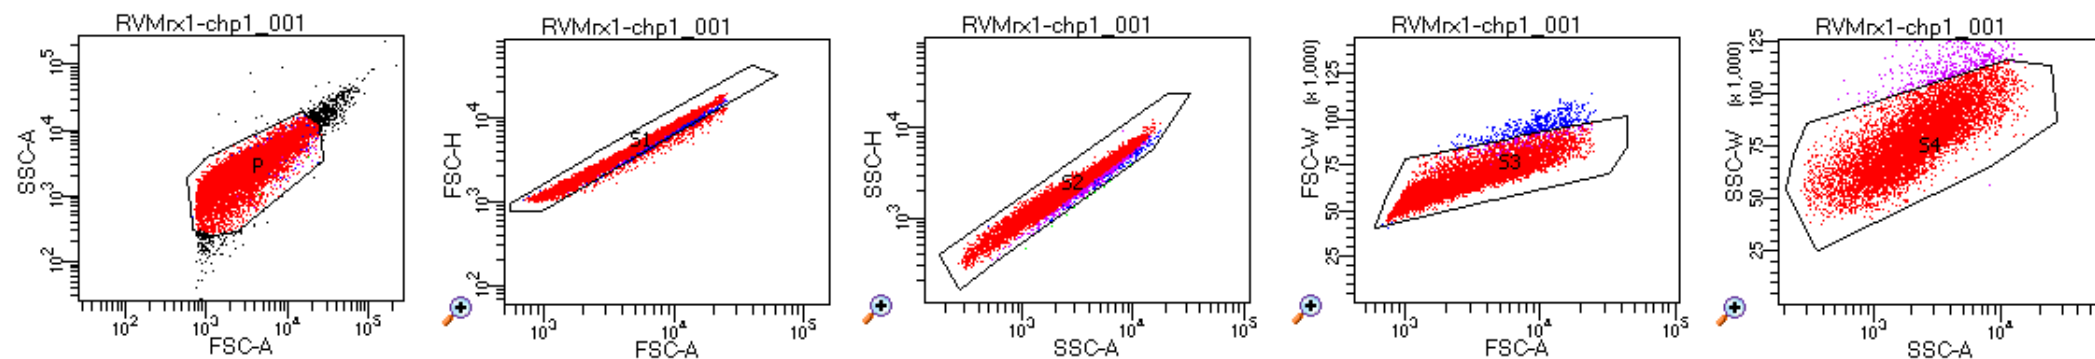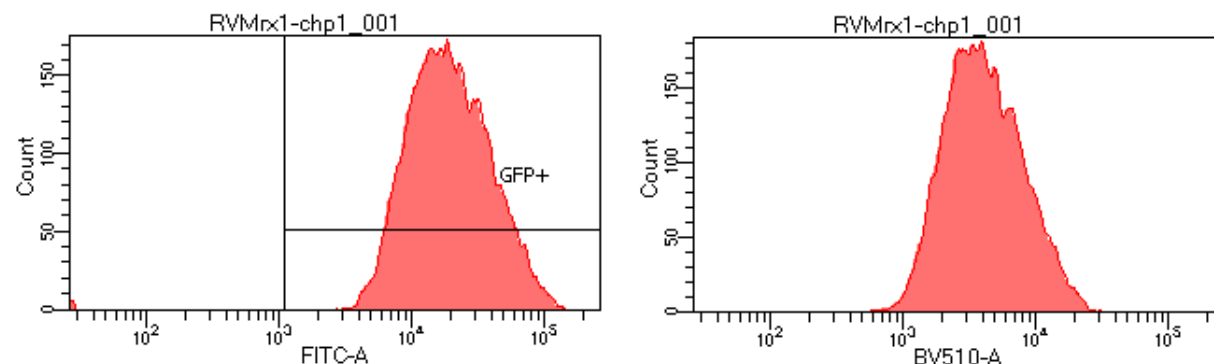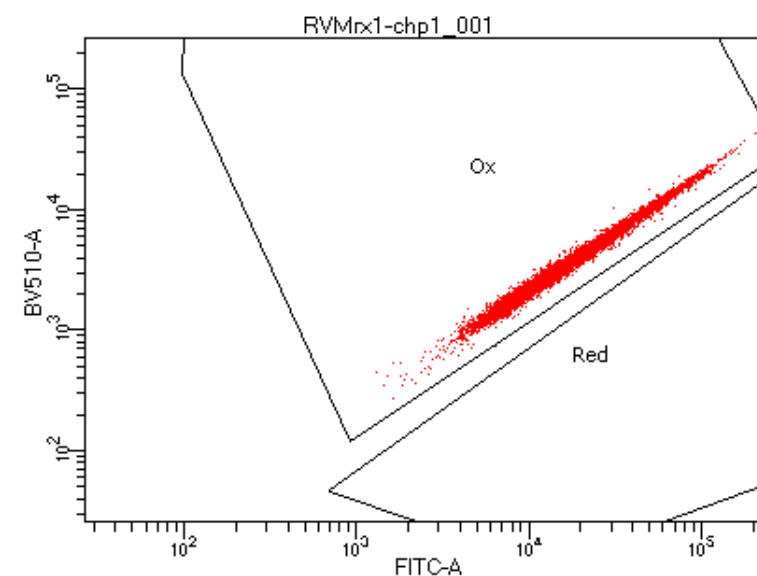

Tube: chp1\_001

| Population | #Events | %Parent | %Total |
|------------|---------|---------|--------|
| All Events | 10,642  | ####    | 100.0  |
| P          | 10,000  | 94.0    | 94.0   |
| S1         | 9,667   | 96.7    | 90.8   |
| S2         | 9,648   | 99.8    | 90.7   |
| S3         | 9,219   | 95.6    | 86.6   |
| S4         | 8,809   | 95.6    | 82.8   |
| GFP+       | 8,784   | 99.7    | 82.5   |
| Ox         | 8,783   | 100.0   | 82.5   |
| Red        | 0       | 0.0     | 0.0    |

Experiment Name: 09Mar2017 Bac\_001  
 Specimen Name: RVMrx1  
 Tube Name: chp1\_001  
 Record Date: Mar 20, 2017 2:41:51 PM  
 SOP: Administrator  
 GUID: 97088fa8-be80-4712-8fc7-9486c5a...

| Population | #Events | %Parent | FITC-A<br>Median | BV510-A<br>Median |
|------------|---------|---------|------------------|-------------------|
| S4         | 8,809   | 95.6    | 17,920           | 3,761             |
| GFP+       | 8,784   | 99.7    | 17,985           | 3,767             |
| Ox         | 8,783   | 100.0   | 17,987           | 3,767             |
| Red        | 0       | 0.0     | ####             | ####              |

RVMrx1-chp1\_001

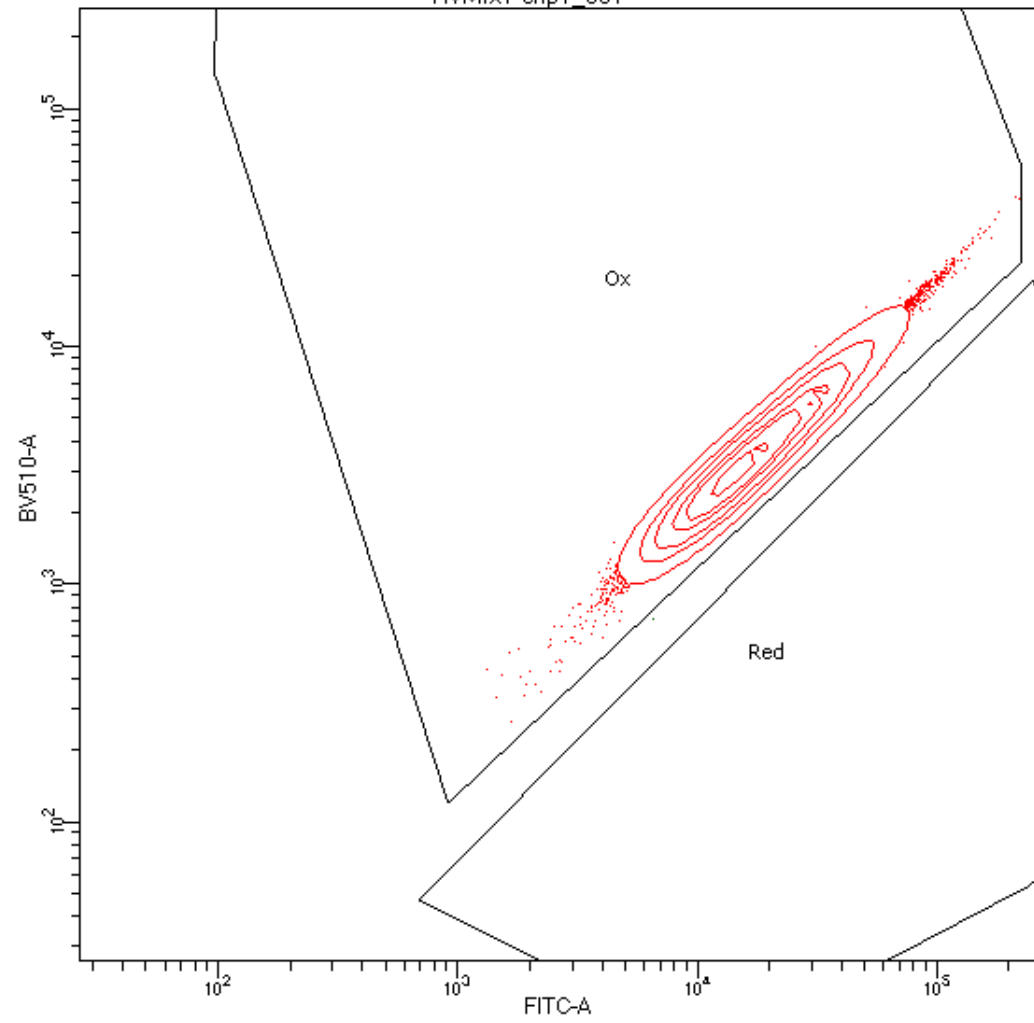

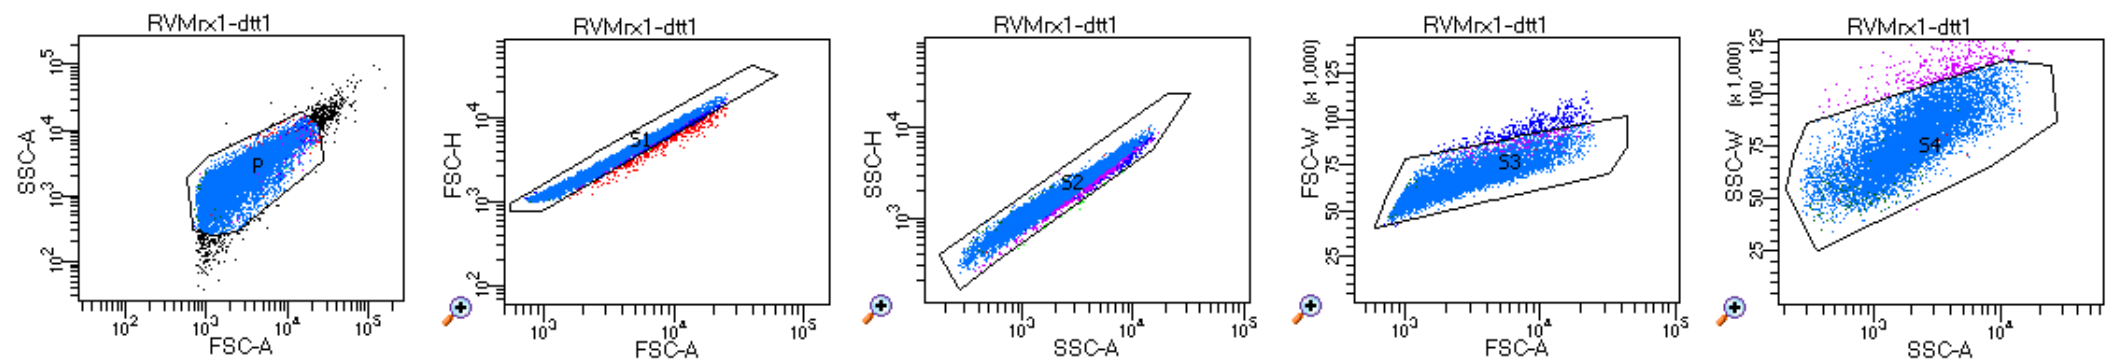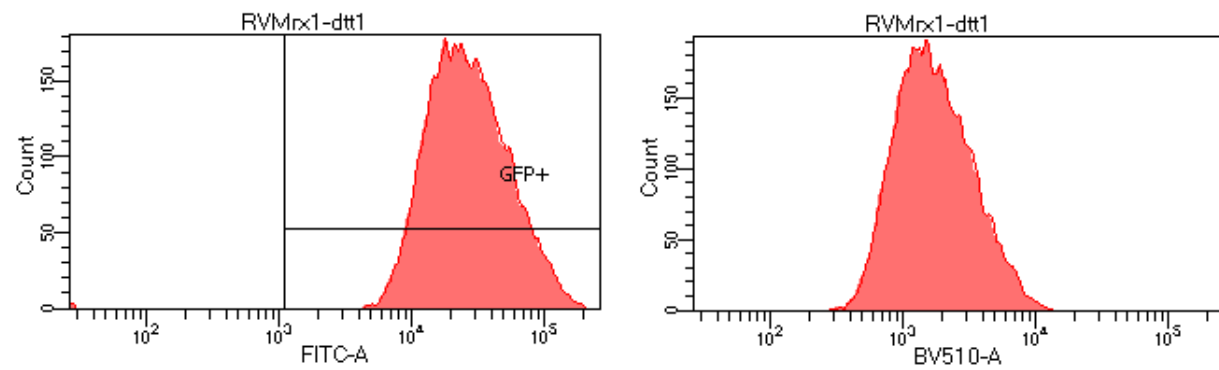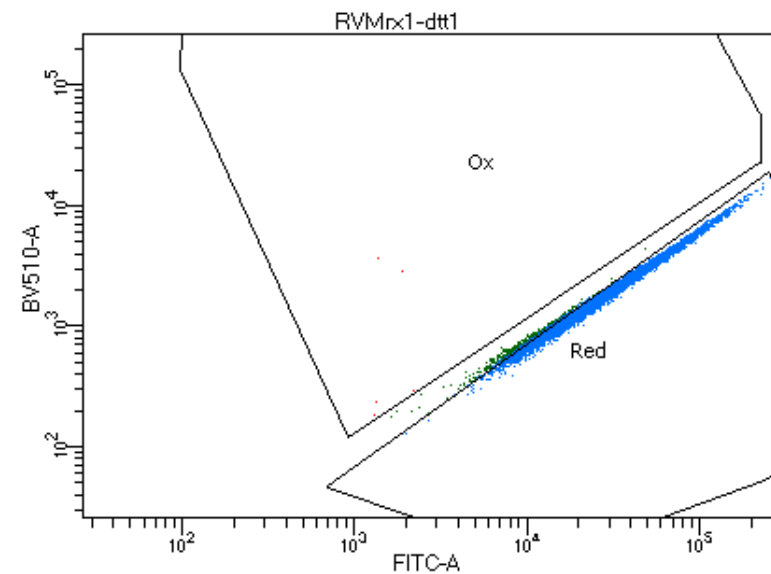

Tube: dtt1

| Population | #Events | %Parent | %Total |
|------------|---------|---------|--------|
| All Events | 10,541  | ####    | 100.0  |
| P          | 10,000  | 94.9    | 94.9   |
| S1         | 9,658   | 96.6    | 91.6   |
| S2         | 9,639   | 99.8    | 91.4   |
| S3         | 9,272   | 96.2    | 88.0   |
| S4         | 8,873   | 95.7    | 84.2   |
| GFP+       | 8,855   | 99.8    | 84.0   |
| Ox         | 5       | 0.1     | 0.0    |
| Red        | 8,500   | 96.0    | 80.6   |

Experiment Name: 09Mar2017 Bac\_001  
 Specimen Name: RVMrx1  
 Tube Name: dtt1  
 Record Date: Mar 20, 2017 2:42:52 PM  
 SOP: Administrator  
 GUID: 87d22f1c-cd15-4ee9-9337-f8c4b08f...

| Population | #Events | %Parent | FITC-A<br>Median | BV510-A<br>Median |
|------------|---------|---------|------------------|-------------------|
| S4         | 8,873   | 95.7    | 24,823           | 1,566             |
| GFP+       | 8,855   | 99.8    | 24,868           | 1,570             |
| Ox         | 5       | 0.1     | 1,348            | 289               |
| Red        | 8,500   | 96.0    | 25,711           | 1,625             |



RVMx1-dtt1

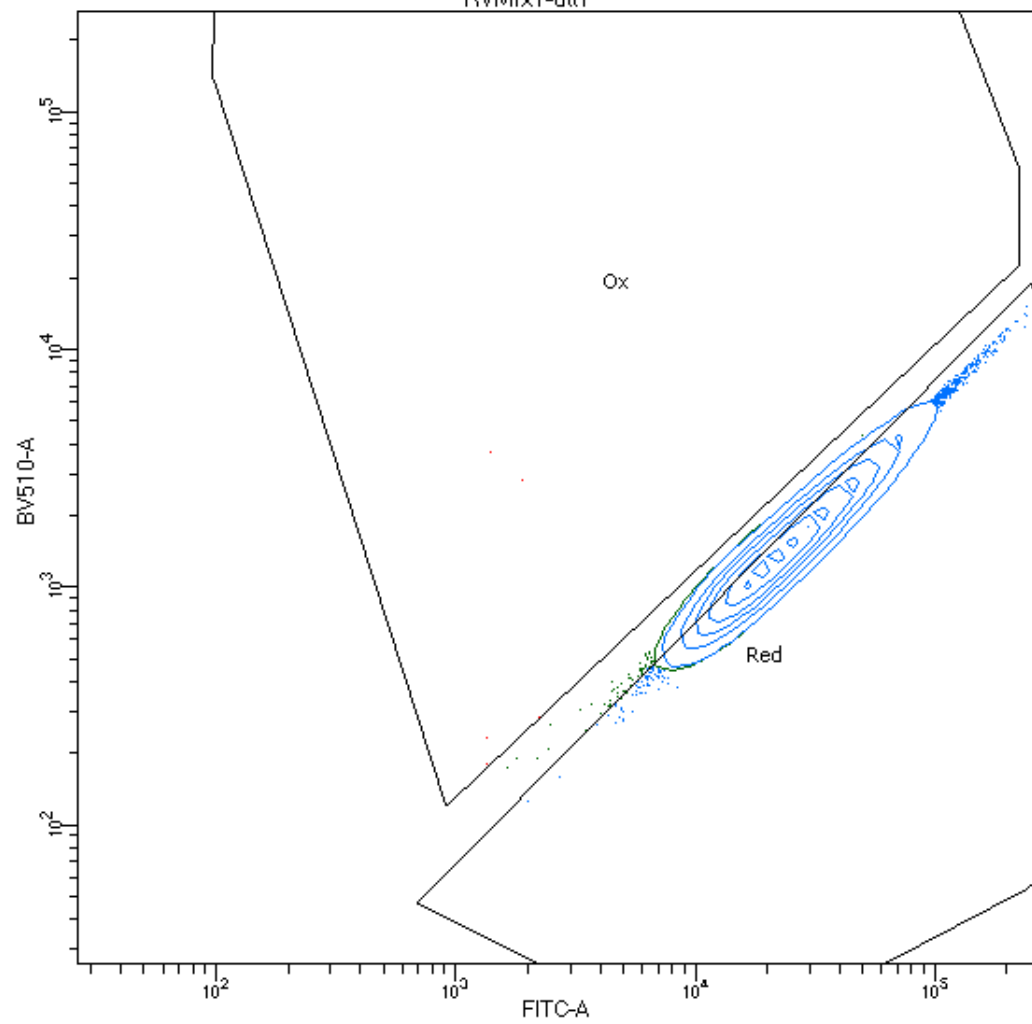

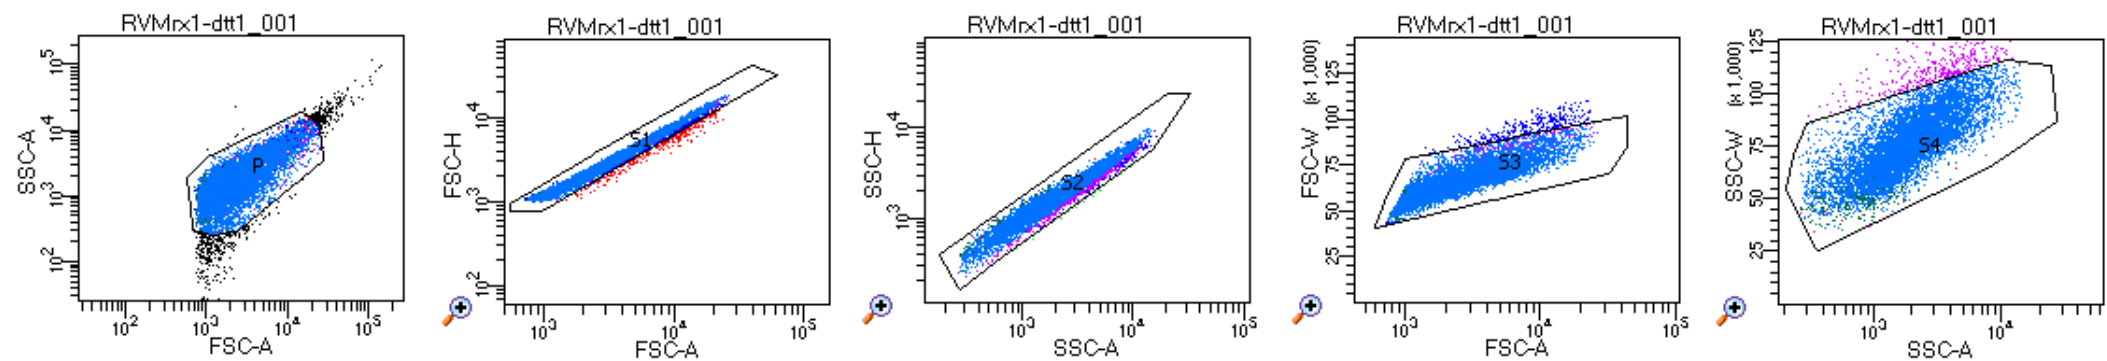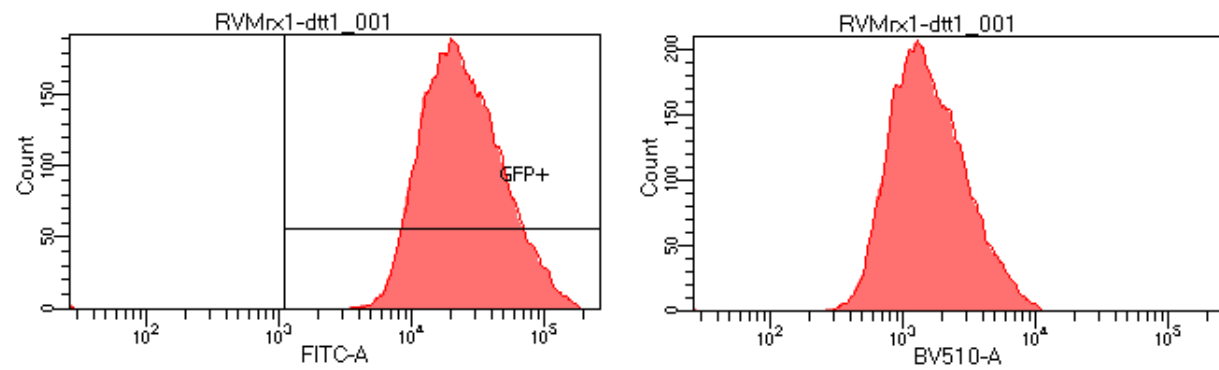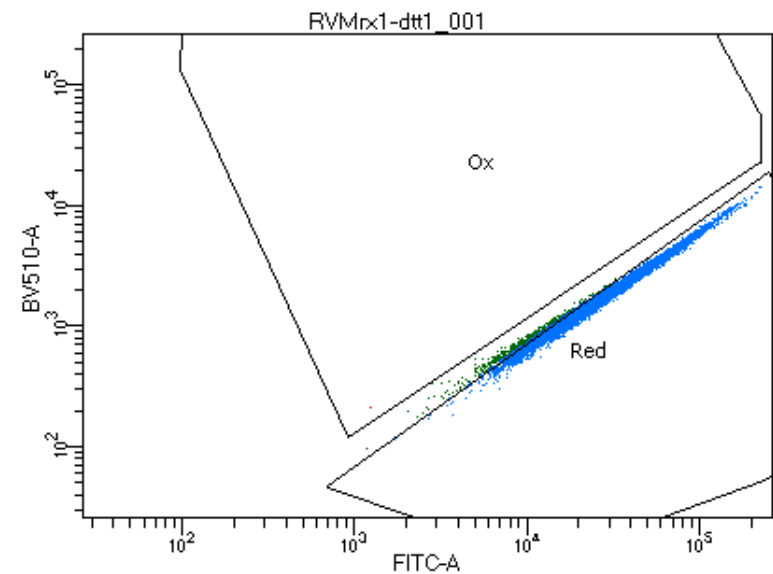

Tube: dtt1\_001

| Population | #Events | %Parent | %Total |
|------------|---------|---------|--------|
| All Events | 10,547  | ####    | 100.0  |
| P          | 10,000  | 94.8    | 94.8   |
| S1         | 9,745   | 97.4    | 92.4   |
| S2         | 9,726   | 99.8    | 92.2   |
| S3         | 9,411   | 96.8    | 89.2   |
| S4         | 9,050   | 96.2    | 85.8   |
| GFP+       | 9,034   | 99.8    | 85.7   |
| Ox         | 1       | 0.0     | 0.0    |
| Red        | 8,477   | 93.8    | 80.4   |

Experiment Name: 09Mar2017 Bac\_001  
 Specimen Name: RVMrx1  
 Tube Name: dtt1\_001  
 Record Date: Mar 20, 2017 2:44:57 PM  
 SOP: Administrator  
 GUID: d63165cf-4c1d-45f7-a1da-ee1cfa79f...

| Population | #Events | %Parent | FITC-A<br>Median | BV510-A<br>Median |
|------------|---------|---------|------------------|-------------------|
| S4         | 9,050   | 96.2    | 22,450           | 1,419             |
| GFP+       | 9,034   | 99.8    | 22,472           | 1,421             |
| Ox         | 1       | 0.0     | 1,212            | 210               |
| Red        | 8,477   | 93.8    | 23,611           | 1,492             |

RVMrx1-dtt1\_001

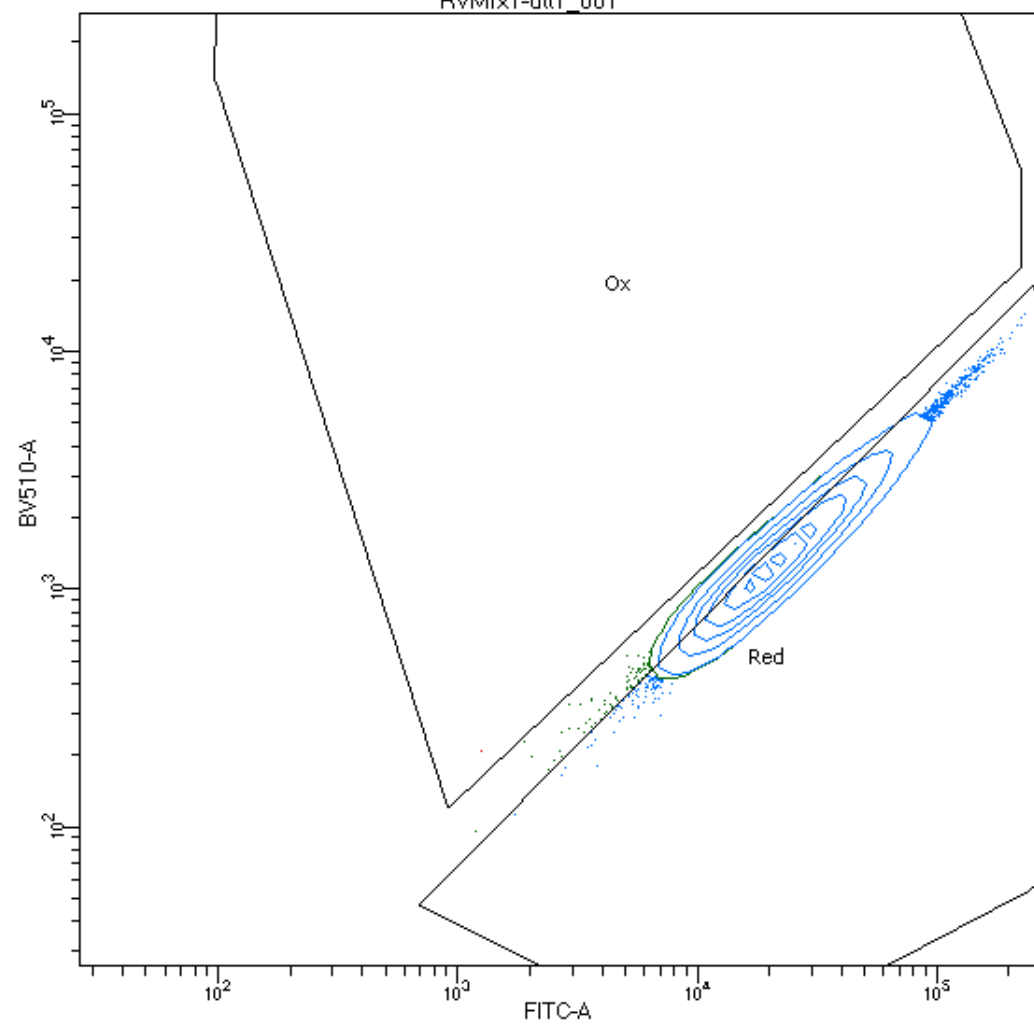

Supplement: supp [file elife-80218-supp-v1.zip]
