# Supplementary material for: Biosensor-integrated transposon mutagenesis reveals rv0158 as a coordinator of redox homeostasis in Mycobacterium tuberculosis
Source: eLife journal article supplement (doi:10.7554/elife.80218), 2023-08-29

# Batch Analysis Report

Run Date: 11/22/16 4:45 PM

Experiment: 21Nov2016 Bac sorting

User ID: Administrator

Statistics Output: C:\Users\Admin\Desktop\21Nov2016 Bac sorting-Batch\_Analysis\_22112016164451.csv

Worksheet PDF Output: C:\Users\Admin\Desktop\21Nov2016 Bac sorting-Batch\_Analysis\_22112016164451.pdf

## 21Nov

| Tube          | Status | Run Time         |
|---------------|--------|------------------|
| US            | OK     | 11/22/16 4:45 PM |
| RV Mrx1       | OK     | 11/22/16 4:45 PM |
| RV Mrx1_001   | OK     | 11/22/16 4:45 PM |
| CHP           | OK     | 11/22/16 4:45 PM |
| CHP_001       | OK     | 11/22/16 4:45 PM |
| DTT           | OK     | 11/22/16 4:45 PM |
| DTT_001       | OK     | 11/22/16 4:45 PM |
| TN lib        | OK     | 11/22/16 4:45 PM |
| Ox Post Sort  | OK     | 11/22/16 4:45 PM |
| Red Post Sort | OK     | 11/22/16 4:45 PM |

## 22Nov

| Tube          | Status | Run Time         |
|---------------|--------|------------------|
| US            | OK     | 11/22/16 4:45 PM |
| RV Mrx1       | OK     | 11/22/16 4:45 PM |
| RV Mrx1_001   | OK     | 11/22/16 4:45 PM |
| CHP           | OK     | 11/22/16 4:45 PM |
| CHP_001       | OK     | 11/22/16 4:45 PM |
| DTT           | OK     | 11/22/16 4:45 PM |
| DTT_001       | OK     | 11/22/16 4:45 PM |
| TN lib        | OK     | 11/22/16 4:45 PM |
| Ox Post Sort  | OK     | 11/22/16 4:45 PM |
| Red Post Sort | OK     | 11/22/16 4:45 PM |

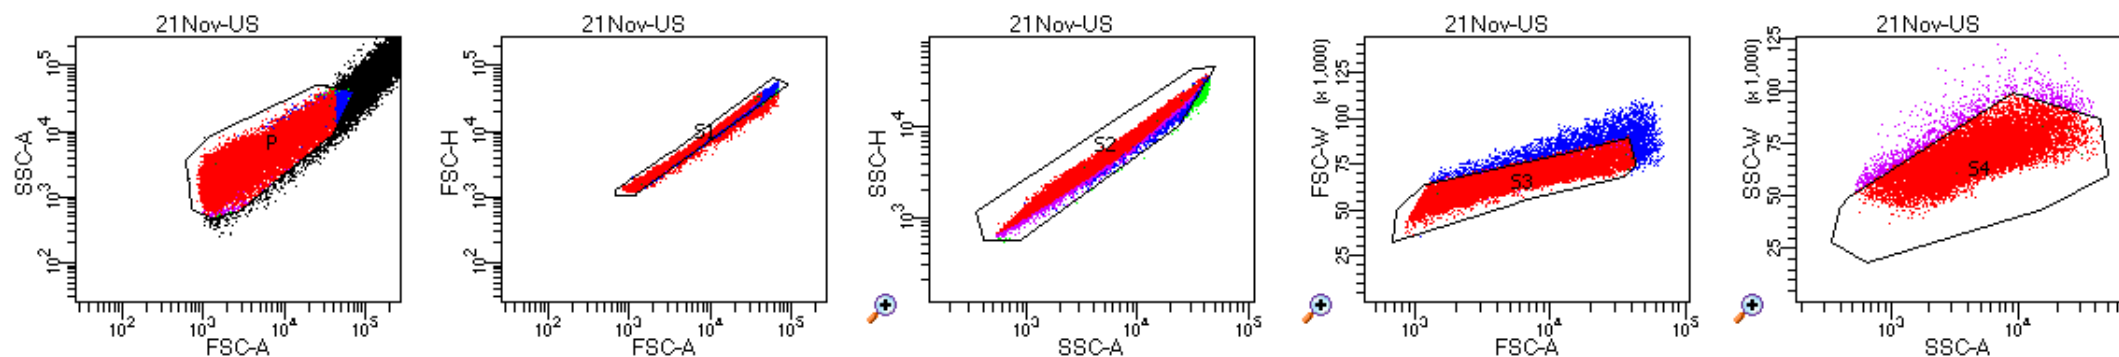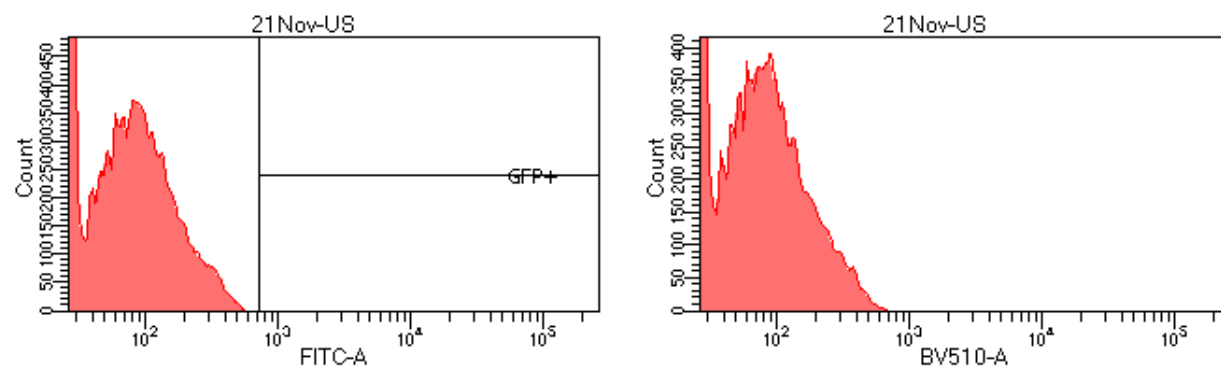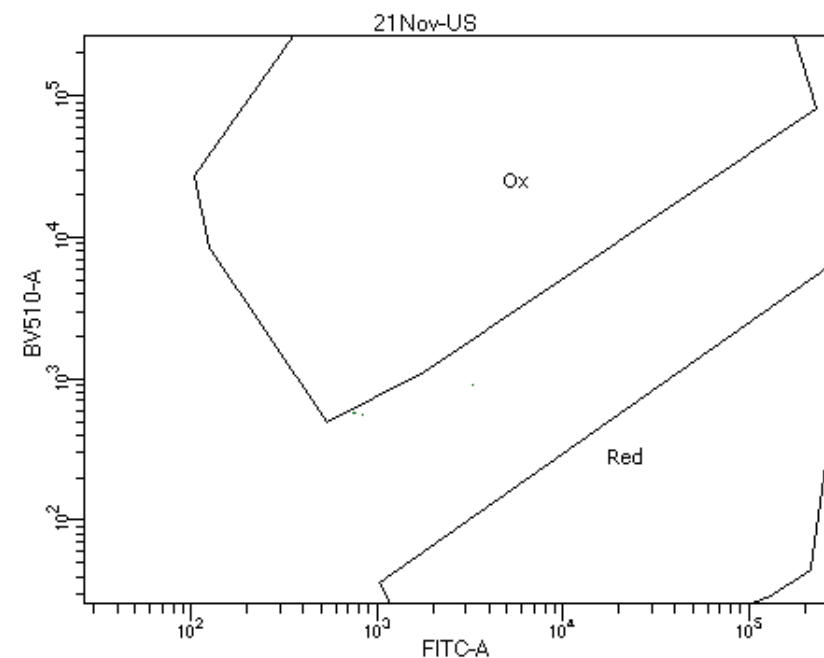

Tube: US

| Population | #Events | %Parent | %Total |
|------------|---------|---------|--------|
| All Events | 37,526  | ####    | 100.0  |
| P          | 26,166  | 69.7    | 69.7   |
| S1         | 25,129  | 96.0    | 67.0   |
| S2         | 24,738  | 98.4    | 65.9   |
| S3         | 22,218  | 89.8    | 59.2   |
| S4         | 21,228  | 95.5    | 56.6   |
| GFP+       | 4       | 0.0     | 0.0    |
| Ox         | 0       | 0.0     | 0.0    |
| Red        | 0       | 0.0     | 0.0    |

|                  |                                |
|------------------|--------------------------------|
| Experiment Name: | 21Nov2016 Bac sorting          |
| Specimen Name:   | 21Nov                          |
| Tube Name:       | US                             |
| Record Date:     | Nov 21, 2016 2:26:52 PM        |
| SOP:             | Administrator                  |
| GUID:            | 2e772c01-6191-4b81-8928-543... |

  

| Population | #Events | %Parent | FITC-A Median | BV510-A Median |
|------------|---------|---------|---------------|----------------|
| S4         | 21,228  | 95.5    | 65            | 67             |
| GFP+       | 4       | 0.0     | 781           | 572            |
| Ox         | 0       | 0.0     | ####          | ####           |
| Red        | 0       | 0.0     | ####          | ####           |

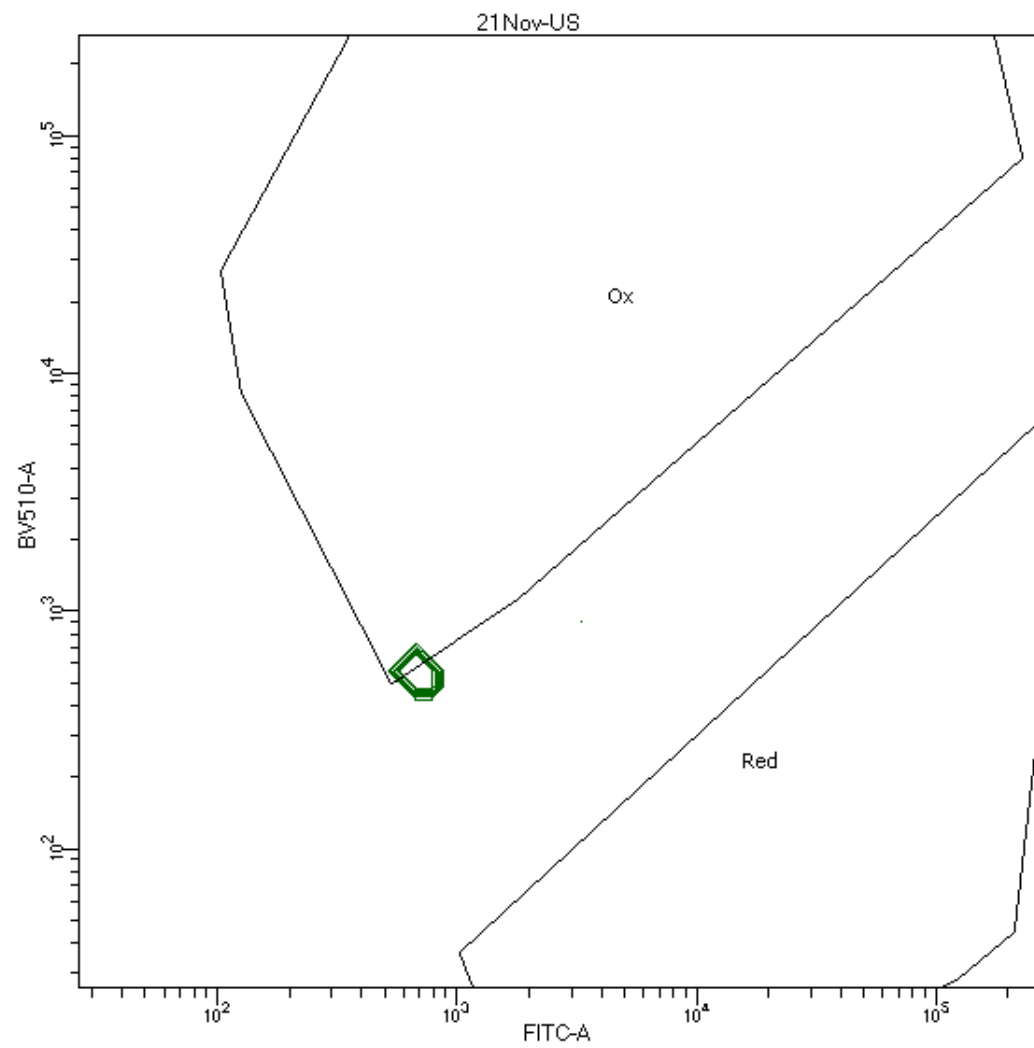

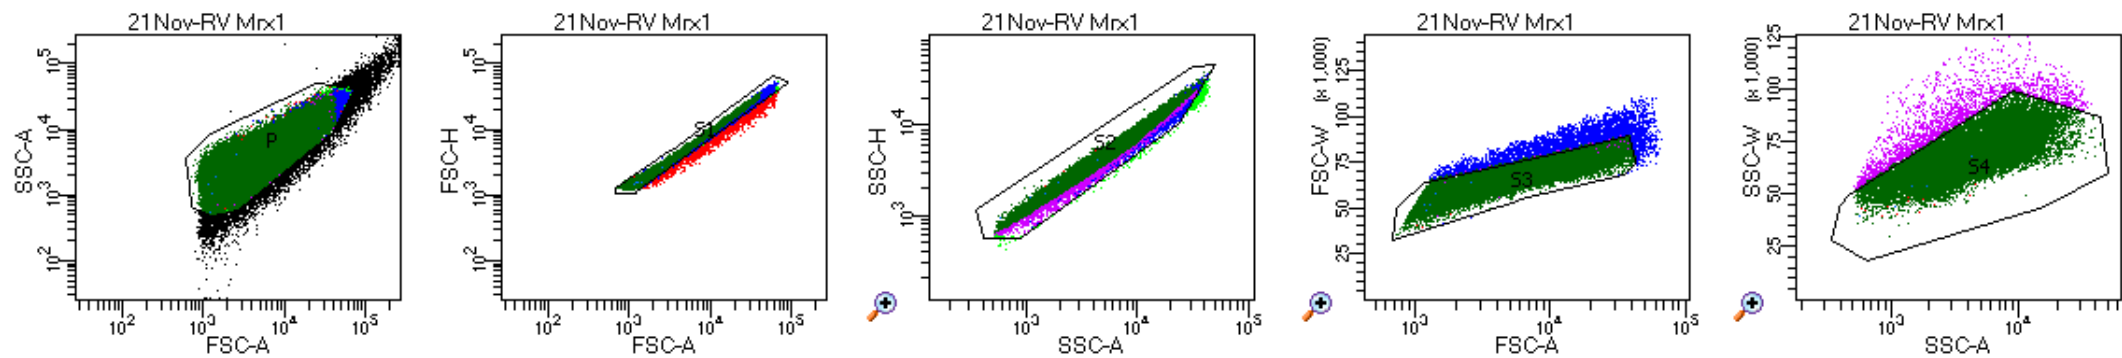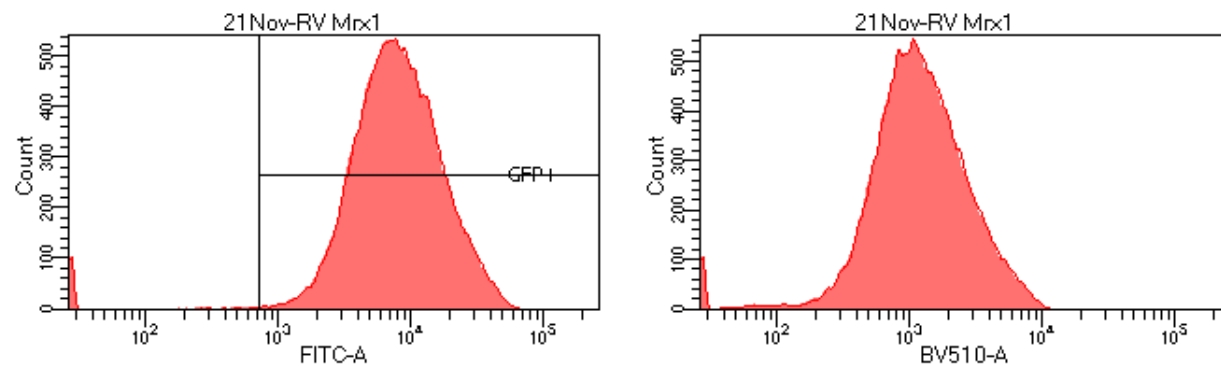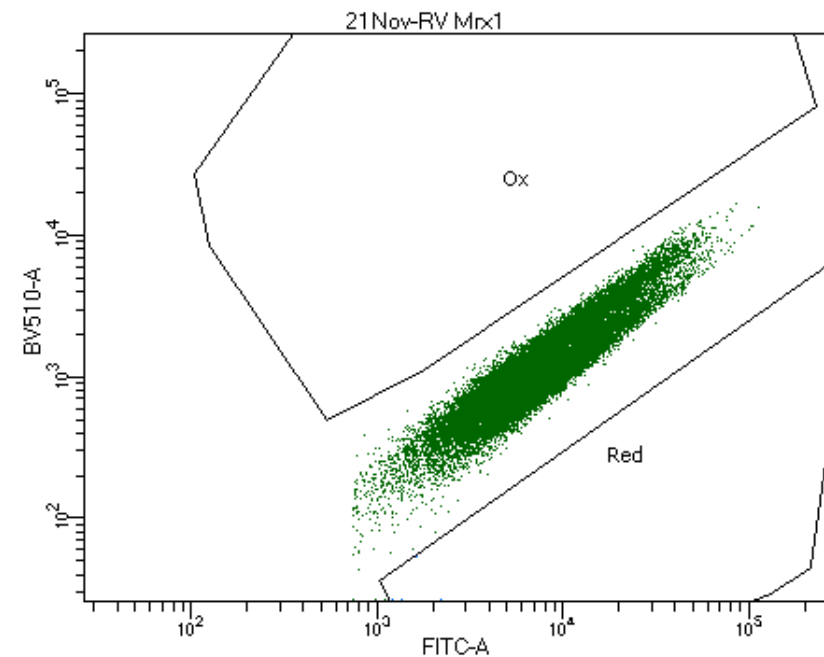

Tube: RV Mrx1

| Population | #Events | %Parent | %Total |
|------------|---------|---------|--------|
| All Events | 40,000  | ####    | 100.0  |
| P          | 35,658  | 89.1    | 89.1   |
| S1         | 33,806  | 94.8    | 84.5   |
| S2         | 33,457  | 99.0    | 83.6   |
| S3         | 30,000  | 89.7    | 75.0   |
| S4         | 28,104  | 93.7    | 70.3   |
| GFP+       | 27,485  | 97.8    | 68.7   |
| Ox         | 0       | 0.0     | 0.0    |
| Red        | 5       | 0.0     | 0.0    |

Experiment Name: 21Nov2016 Bac sorting  
 Specimen Name: 21Nov  
 Tube Name: RV Mrx1  
 Record Date: Nov 21, 2016 2:29:46 PM  
 SOP: Administrator  
 GUID: 3639ef2b-e674-43d8-b7d0-9e5...

| Population | #Events | %Parent | FITC-A<br>Median | BV510-A<br>Median |
|------------|---------|---------|------------------|-------------------|
| S4         | 28,104  | 93.7    | 7,486            | 1,116             |
| GFP+       | 27,485  | 97.8    | 7,650            | 1,140             |
| Ox         | 0       | 0.0     | ####             | ####              |
| Red        | 5       | 0.0     | 1,321            | 22                |

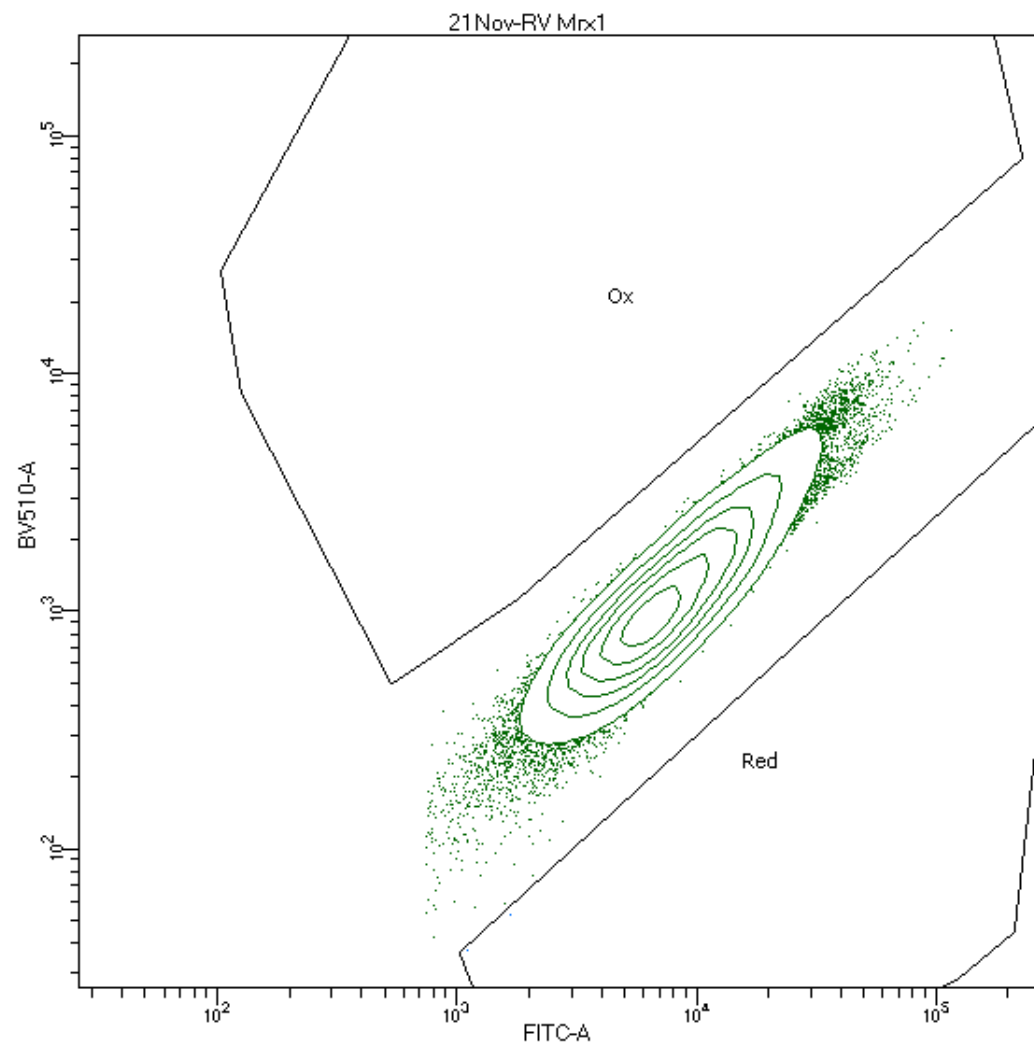

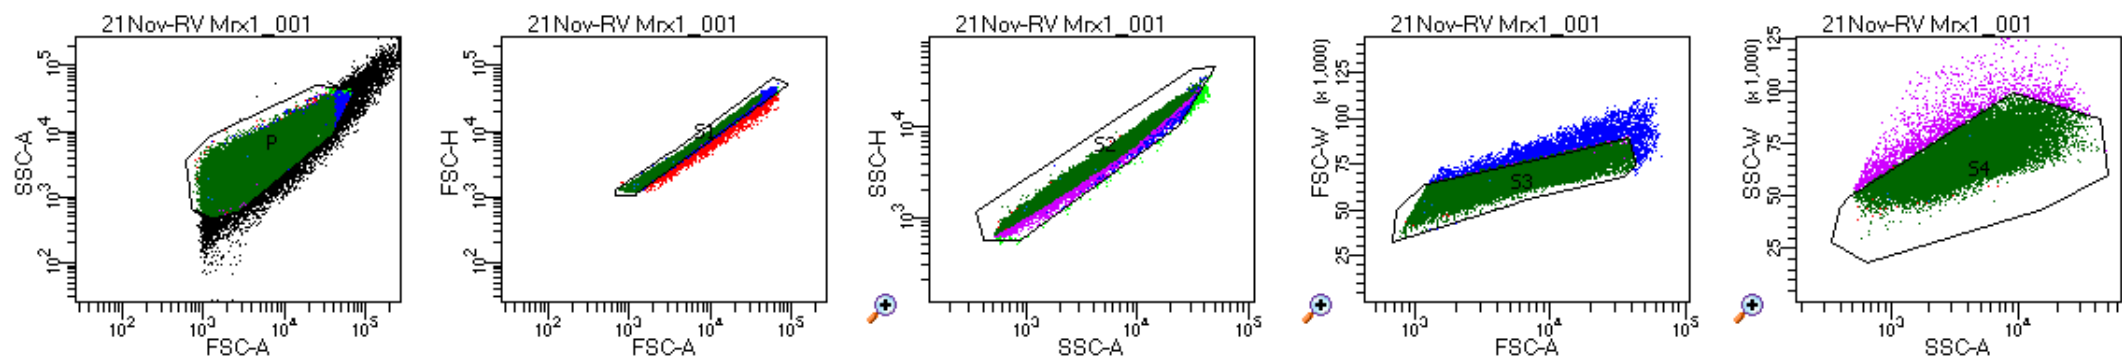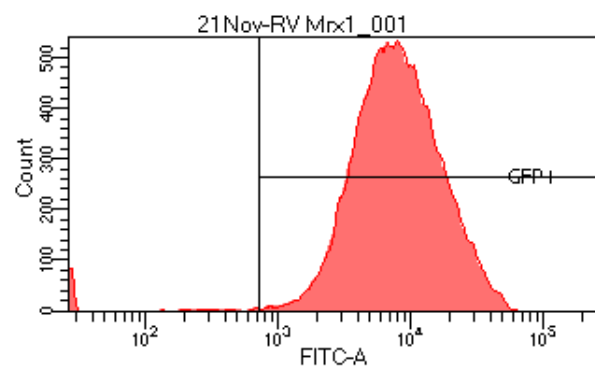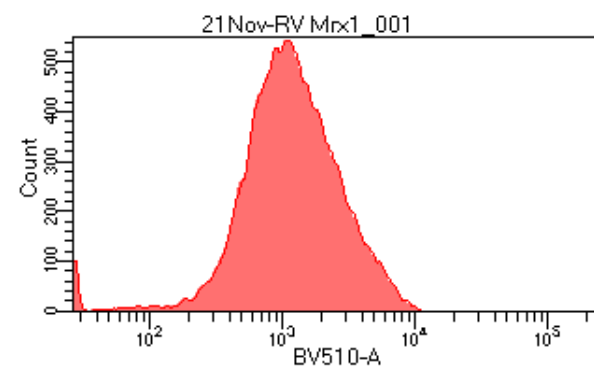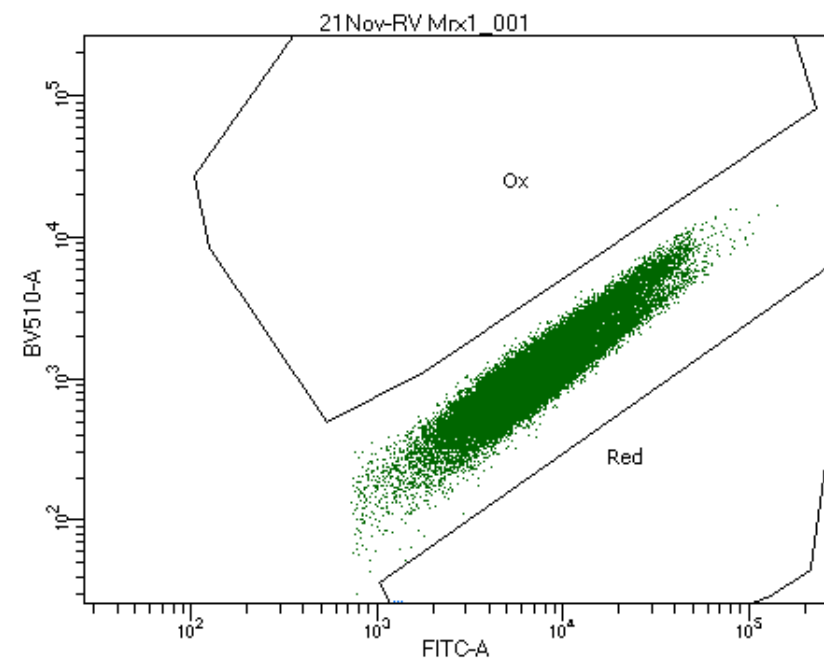

Tube: RV Mrx1\_001

| Population | #Events | %Parent | %Total |
|------------|---------|---------|--------|
| All Events | 40,179  | ####    | 100.0  |
| P          | 35,553  | 88.5    | 88.5   |
| S1         | 33,849  | 95.2    | 84.2   |
| S2         | 33,562  | 99.2    | 83.5   |
| S3         | 30,240  | 90.1    | 75.3   |
| S4         | 28,319  | 93.6    | 70.5   |
| GFP+       | 27,665  | 97.7    | 68.9   |
| Ox         | 0       | 0.0     | 0.0    |
| Red        | 4       | 0.0     | 0.0    |

Experiment Name: 21Nov2016 Bac sorting  
 Specimen Name: 21Nov  
 Tube Name: RV Mrx1\_001  
 Record Date: Nov 21, 2016 2:31:13 PM  
 SOP: Administrator  
 GUID: 3bb8c48d-03bf-4d5e-b0a6-d60...

| Population | #Events | %Parent | FITC-A<br>Median | BV510-A<br>Median |
|------------|---------|---------|------------------|-------------------|
| S4         | 28,319  | 93.6    | 7,432            | 1,099             |
| GFP+       | 27,665  | 97.7    | 7,603            | 1,121             |
| Ox         | 0       | 0.0     | ####             | ####              |
| Red        | 4       | 0.0     | 1,243            | 9                 |

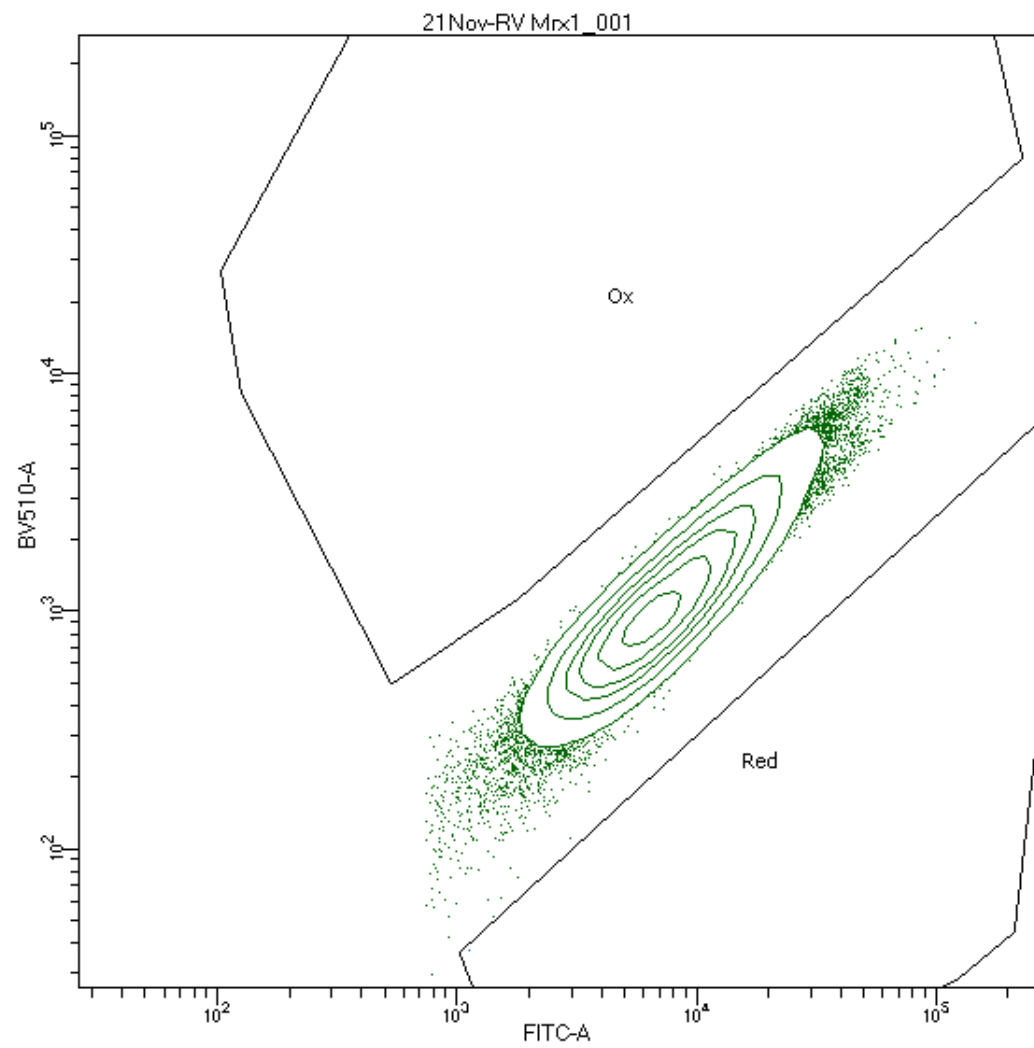

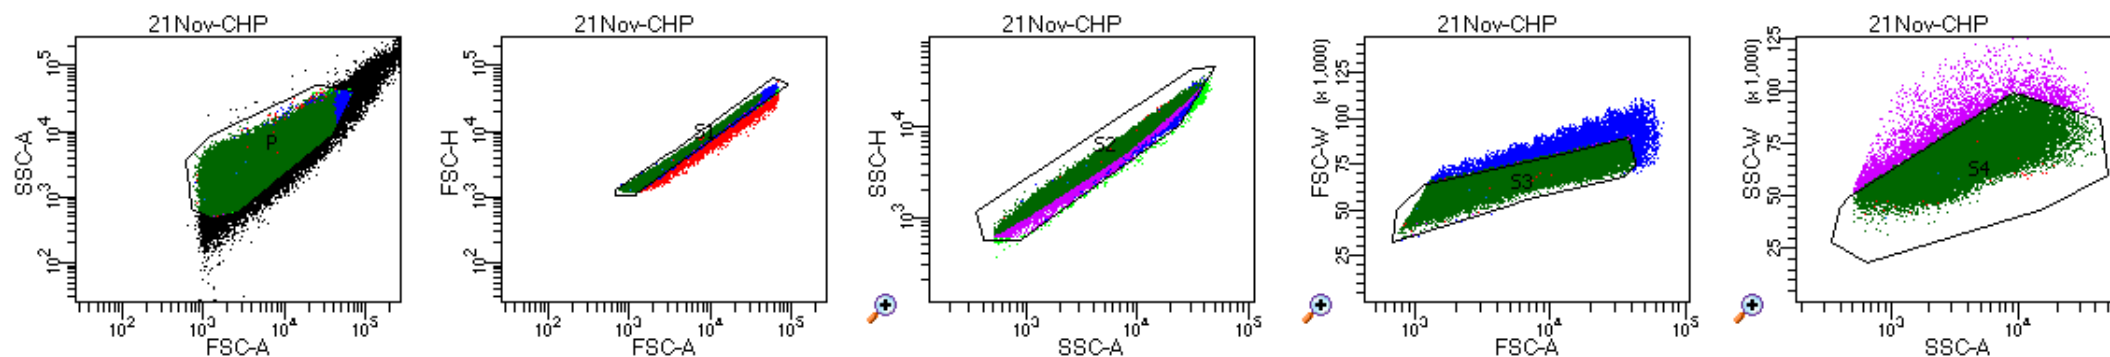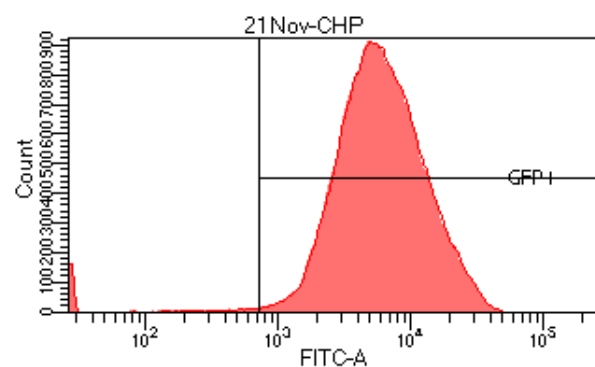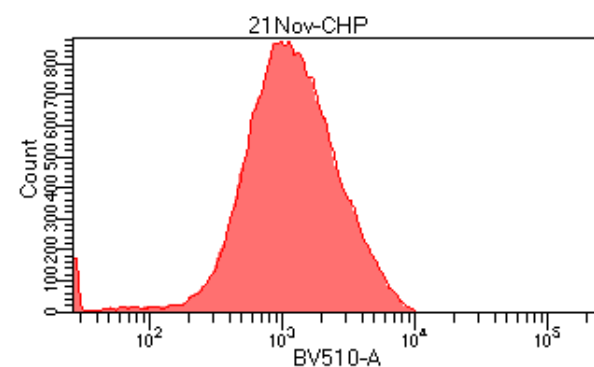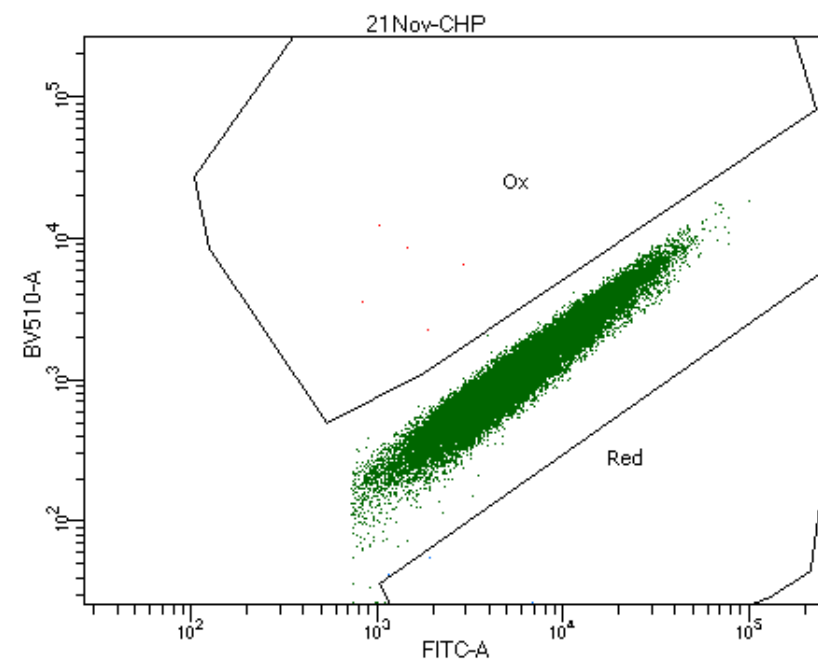

Tube: CHP

| Population | #Events | %Parent | %Total |
|------------|---------|---------|--------|
| All Events | 66,105  | ####    | 100.0  |
| P          | 59,301  | 89.7    | 89.7   |
| S1         | 56,332  | 95.0    | 85.2   |
| S2         | 55,826  | 99.1    | 84.5   |
| S3         | 50,329  | 90.2    | 76.1   |
| S4         | 47,182  | 93.7    | 71.4   |
| GFP+       | 45,833  | 97.1    | 69.3   |
| Ox         | 5       | 0.0     | 0.0    |
| Red        | 3       | 0.0     | 0.0    |

|                  |                                 |
|------------------|---------------------------------|
| Experiment Name: | 21Nov2016 Bac sorting           |
| Specimen Name:   | 21Nov                           |
| Tube Name:       | CHP                             |
| Record Date:     | Nov 21, 2016 2:31:50 PM         |
| SOP:             | Administrator                   |
| GUID:            | 4670f93e-731f-4aac-b304-c644... |

  

| Population | #Events | %Parent | FITC-A<br>Median | BV510-A<br>Median |
|------------|---------|---------|------------------|-------------------|
| S4         | 47,182  | 93.7    | 5,551            | 1,091             |
| GFP+       | 45,833  | 97.1    | 5,711            | 1,119             |
| Ox         | 5       | 0.0     | 1,437            | 6,458             |
| Red        | 3       | 0.0     | 1,873            | 42                |



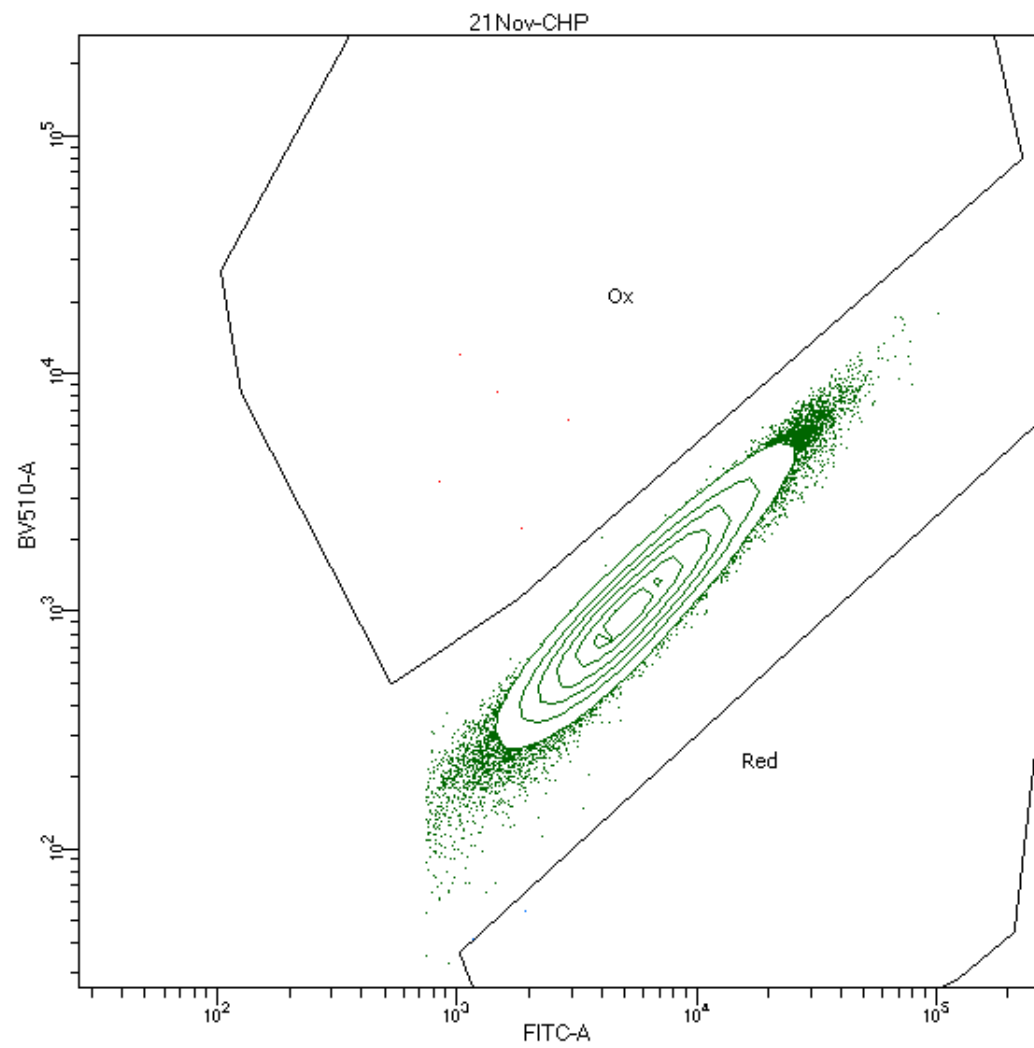

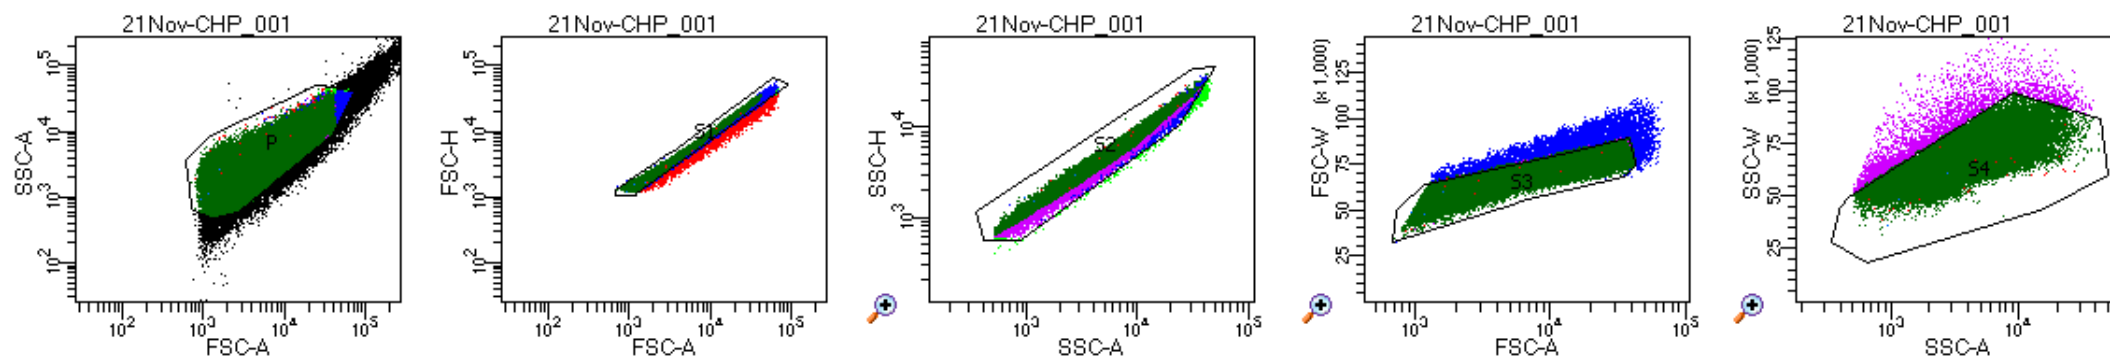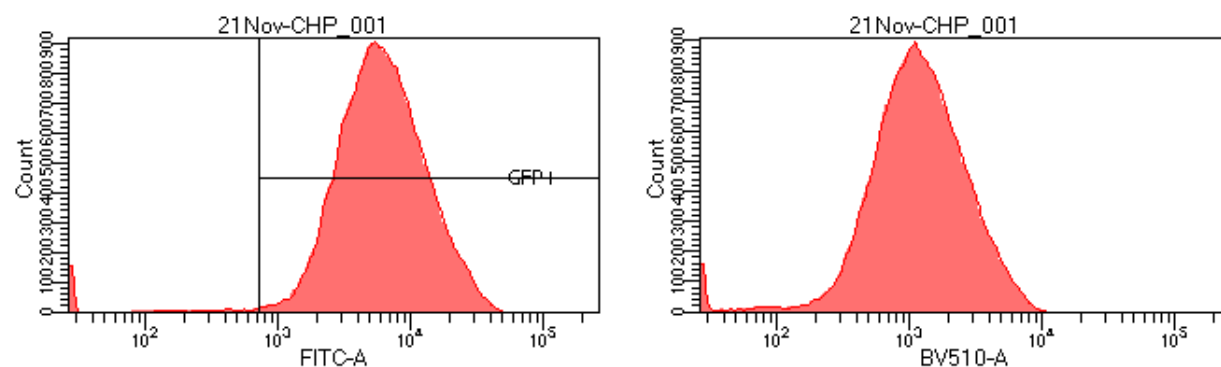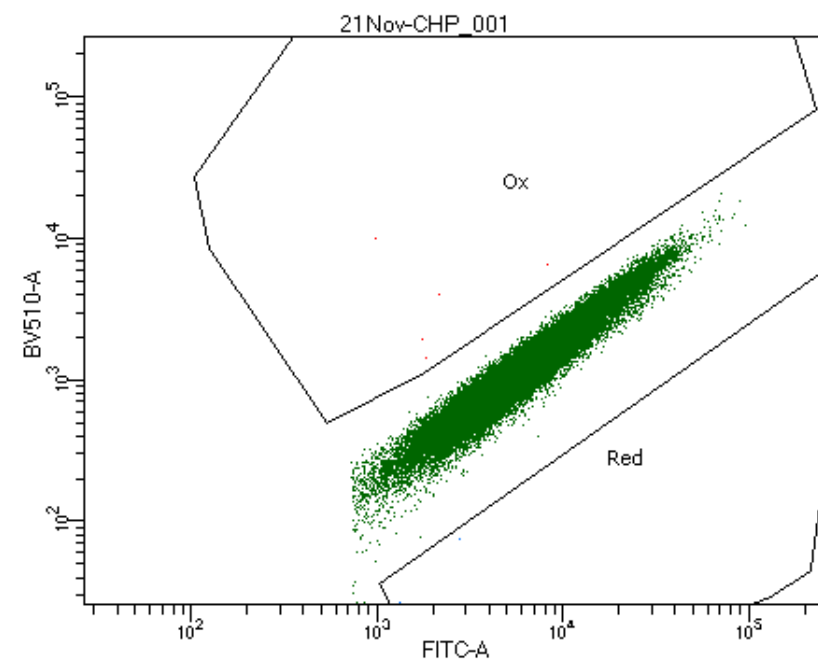

Tube: CHP\_001

| Population | #Events | %Parent | %Total |
|------------|---------|---------|--------|
| All Events | 66,176  | ####    | 100.0  |
| P          | 59,246  | 89.5    | 89.5   |
| S1         | 56,332  | 95.1    | 85.1   |
| S2         | 55,812  | 99.1    | 84.3   |
| S3         | 50,331  | 90.2    | 76.1   |
| S4         | 47,191  | 93.8    | 71.3   |
| GFP+       | 45,870  | 97.2    | 69.3   |
| Ox         | 6       | 0.0     | 0.0    |
| Red        | 3       | 0.0     | 0.0    |

Experiment Name: 21Nov2016 Bac sorting  
 Specimen Name: 21Nov  
 Tube Name: CHP\_001  
 Record Date: Nov 21, 2016 2:32:27 PM  
 SOP: Administrator  
 GUID: 082ac3e6-ea69-4c4a-8f5c-049...

| Population | #Events | %Parent | FITC-A<br>Median | BV510-A<br>Median |
|------------|---------|---------|------------------|-------------------|
| S4         | 47,191  | 93.8    | 5,680            | 1,112             |
| GFP+       | 45,870  | 97.2    | 5,832            | 1,141             |
| Ox         | 6       | 0.0     | 1,960            | 3,186             |
| Red        | 3       | 0.0     | 1,348            | 45                |

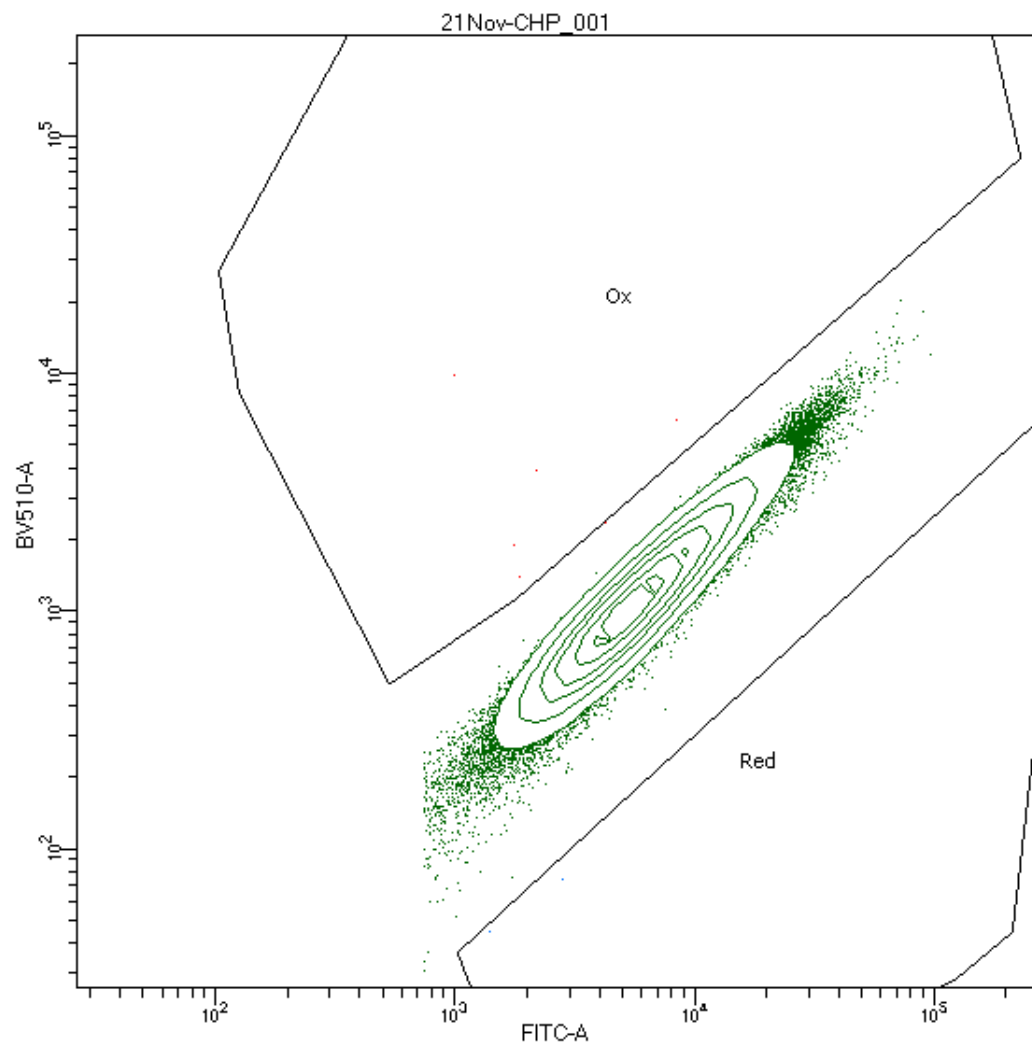

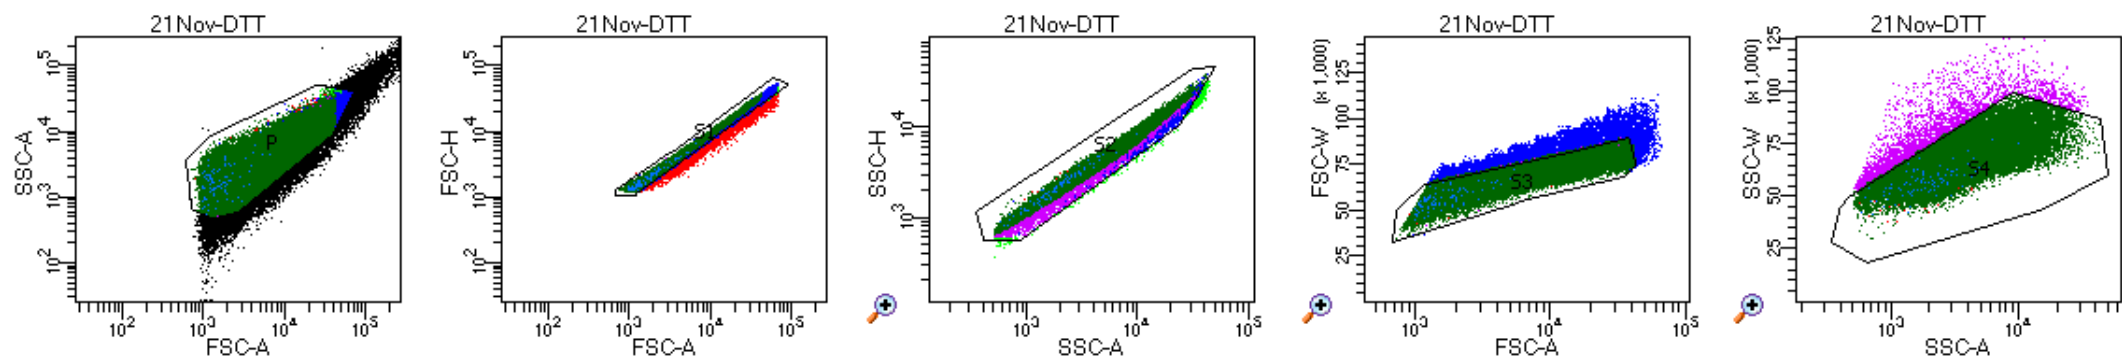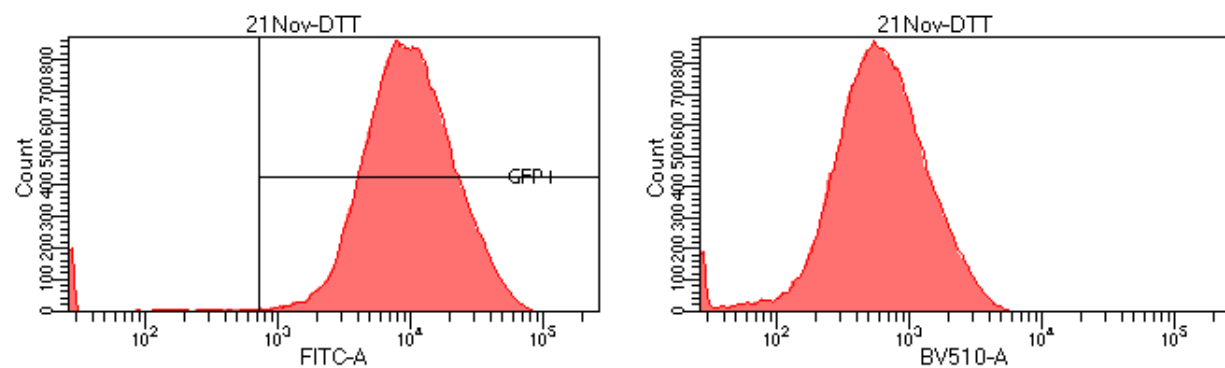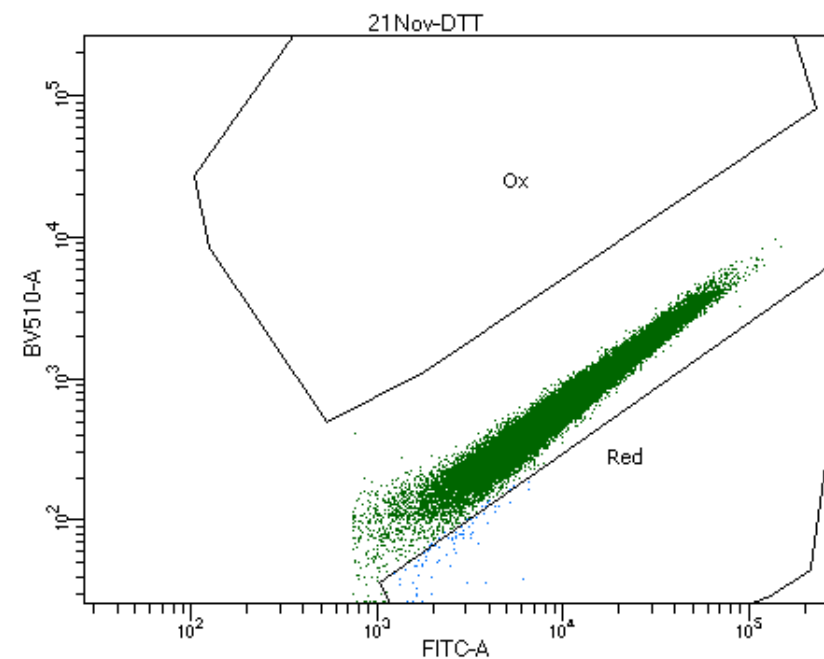

Tube: DTT

| Population | #Events | %Parent | %Total |
|------------|---------|---------|--------|
| All Events | 67,341  | ####    | 100.0  |
| P          | 59,044  | 87.7    | 87.7   |
| S1         | 55,948  | 94.8    | 83.1   |
| S2         | 55,517  | 99.2    | 82.4   |
| S3         | 49,412  | 89.0    | 73.4   |
| S4         | 46,459  | 94.0    | 69.0   |
| GFP+       | 45,227  | 97.3    | 67.2   |
| Ox         | 0       | 0.0     | 0.0    |
| Red        | 91      | 0.2     | 0.1    |

|                  |                                  |
|------------------|----------------------------------|
| Experiment Name: | 21Nov2016 Bac sorting            |
| Specimen Name:   | 21Nov                            |
| Tube Name:       | DTT                              |
| Record Date:     | Nov 21, 2016 2:33:07 PM          |
| SOP:             | Administrator                    |
| GUID:            | ca9c42d3-7f3b-4f51-9755-cb62f... |

  

| Population | #Events | %Parent | FITC-A Median | BV510-A Median |
|------------|---------|---------|---------------|----------------|
| S4         | 46,459  | 94.0    | 9,158         | 574            |
| GFP+       | 45,227  | 97.3    | 9,395         | 588            |
| Ox         | 0       | 0.0     | ####          | ####           |
| Red        | 91      | 0.2     | 2,509         | 71             |

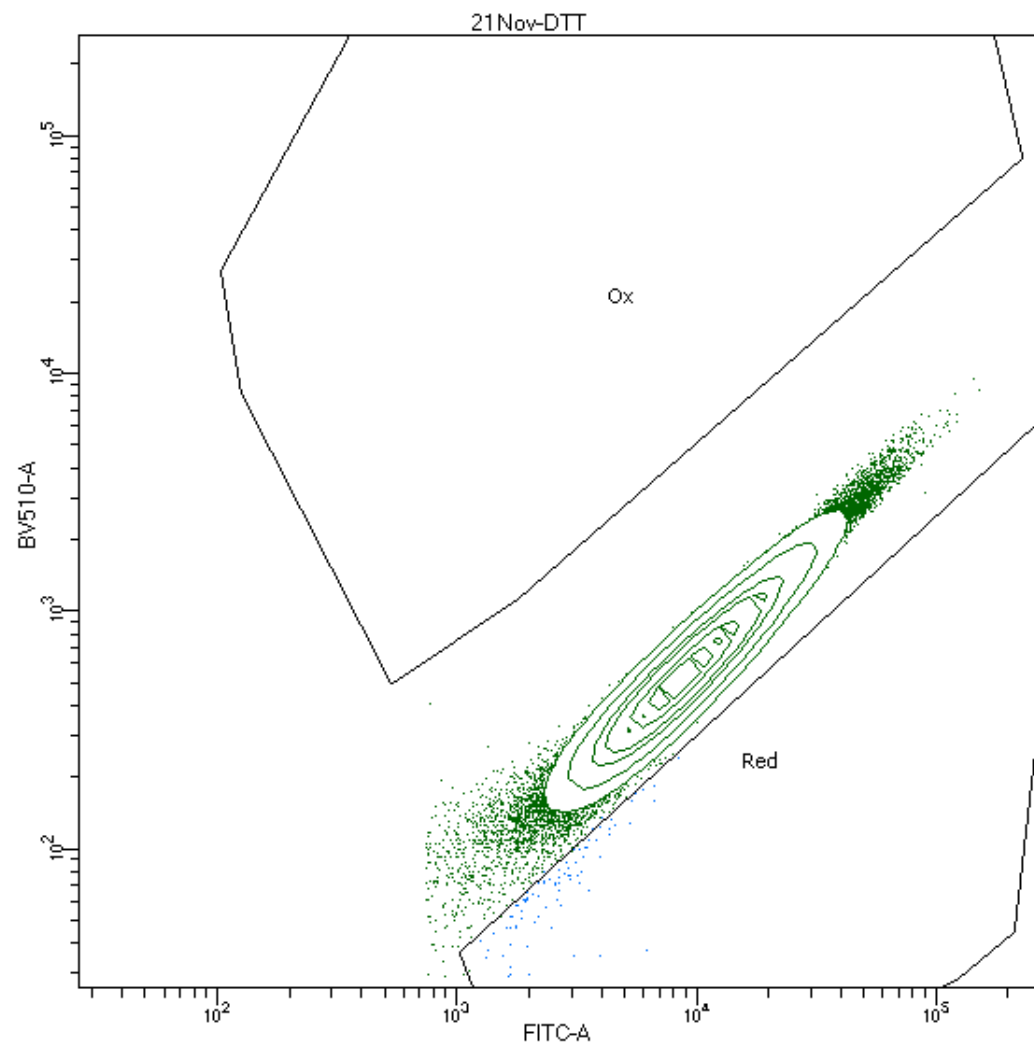

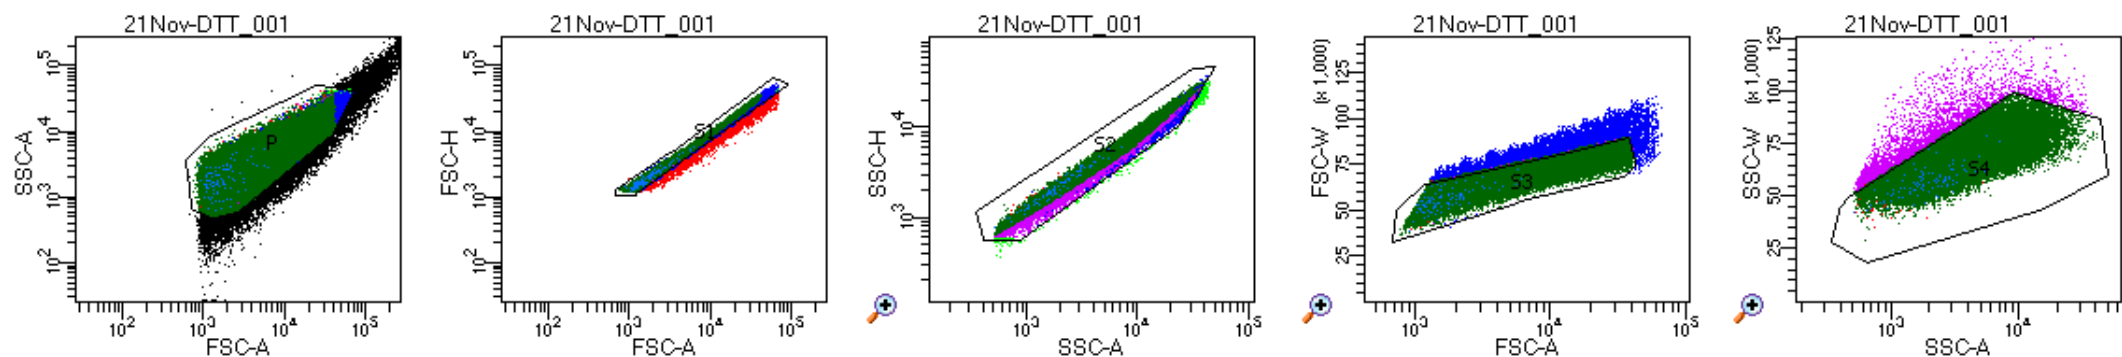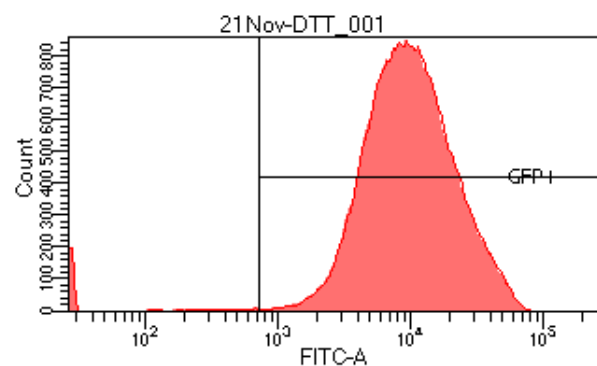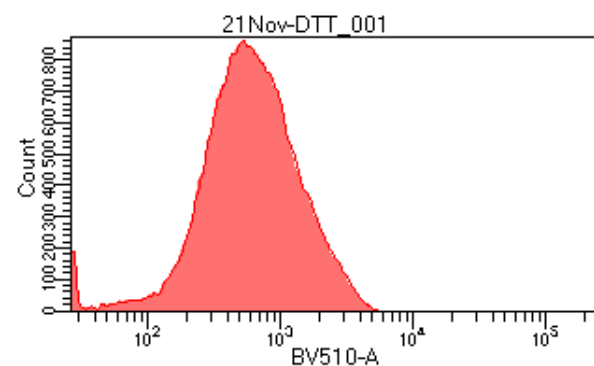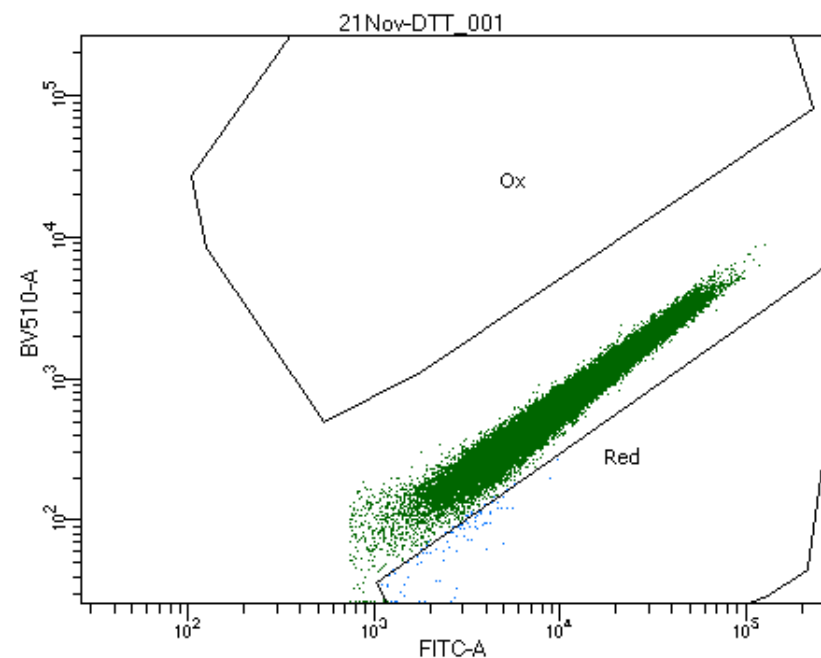

Tube: DTT\_001

| Population | #Events | %Parent | %Total |
|------------|---------|---------|--------|
| All Events | 67,314  | ####    | 100.0  |
| P          | 59,252  | 88.0    | 88.0   |
| S1         | 56,030  | 94.6    | 83.2   |
| S2         | 55,604  | 99.2    | 82.6   |
| S3         | 49,283  | 88.6    | 73.2   |
| S4         | 46,330  | 94.0    | 68.8   |
| GFP+       | 45,064  | 97.3    | 66.9   |
| Ox         | 0       | 0.0     | 0.0    |
| Red        | 101     | 0.2     | 0.2    |

Experiment Name: 21Nov2016 Bac sorting  
 Specimen Name: 21Nov  
 Tube Name: DTT\_001  
 Record Date: Nov 21, 2016 2:33:51 PM  
 SOP: Administrator  
 GUID: 6f0774a9-a53a-45ea-a2aa-82f7...

| Population | #Events | %Parent | FITC-A<br>Median | BV510-A<br>Median |
|------------|---------|---------|------------------|-------------------|
| S4         | 46,330  | 94.0    | 9,086            | 569               |
| GFP+       | 45,064  | 97.3    | 9,322            | 585               |
| Ox         | 0       | 0.0     | ####             | ####              |
| Red        | 101     | 0.2     | 2,827            | 81                |

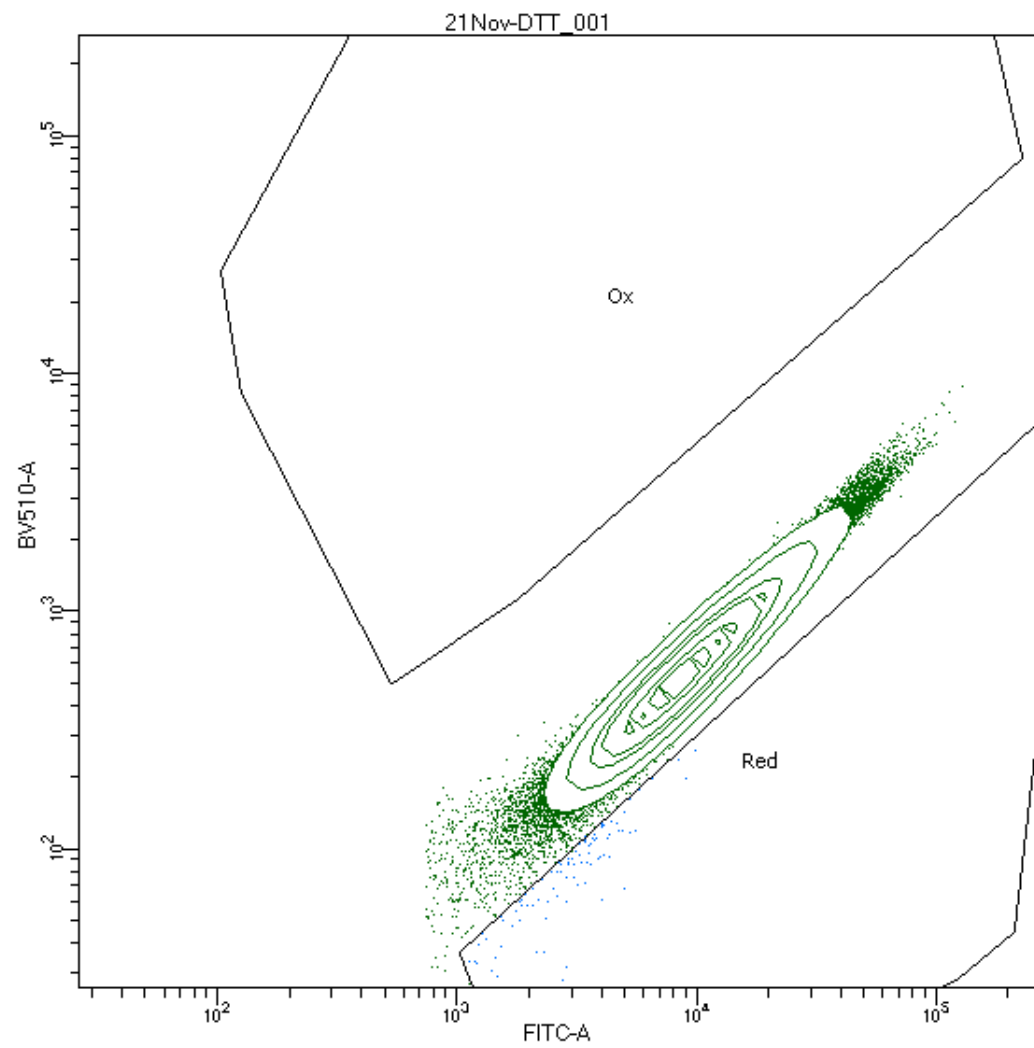

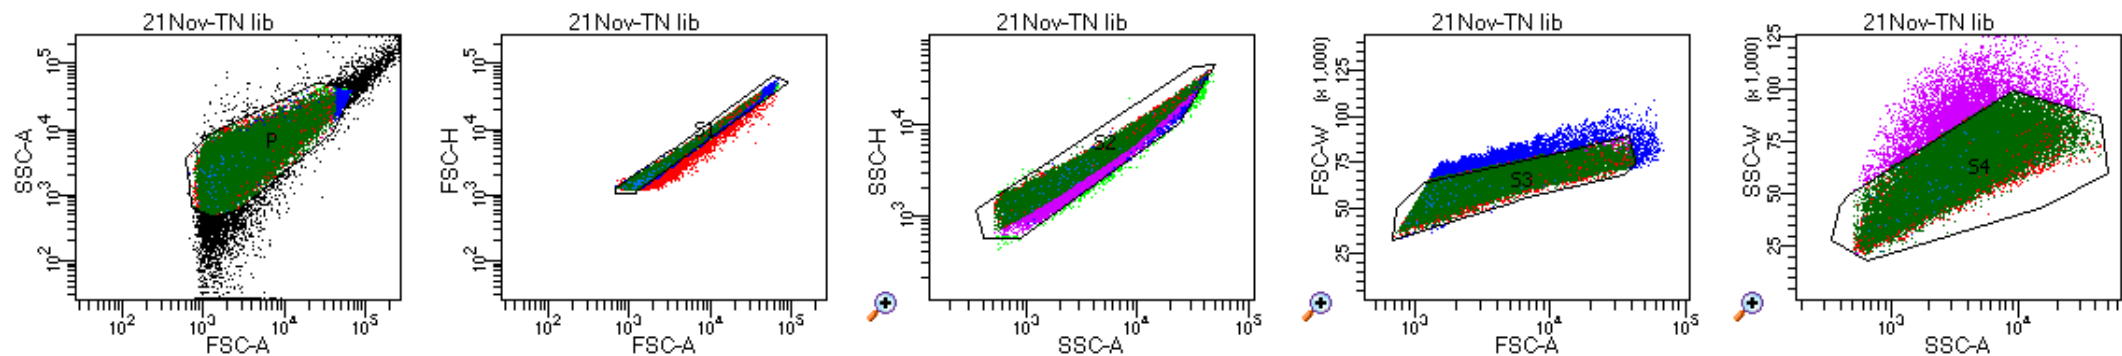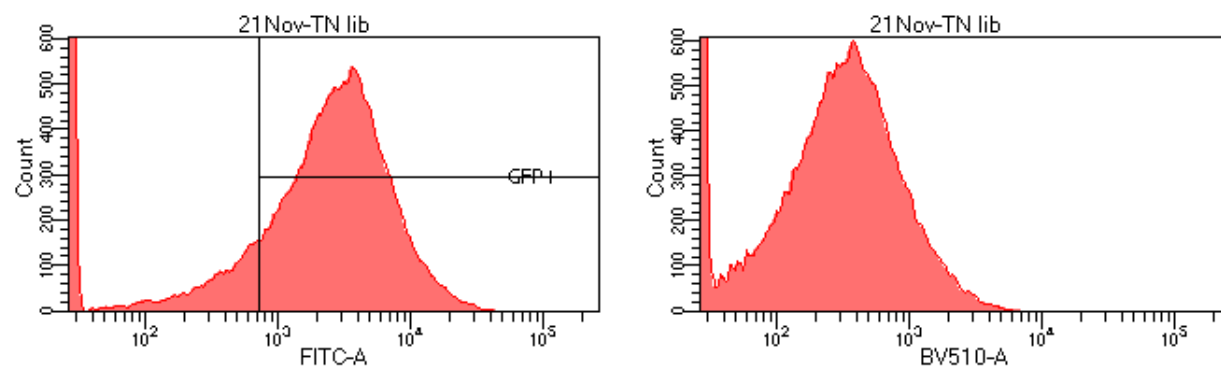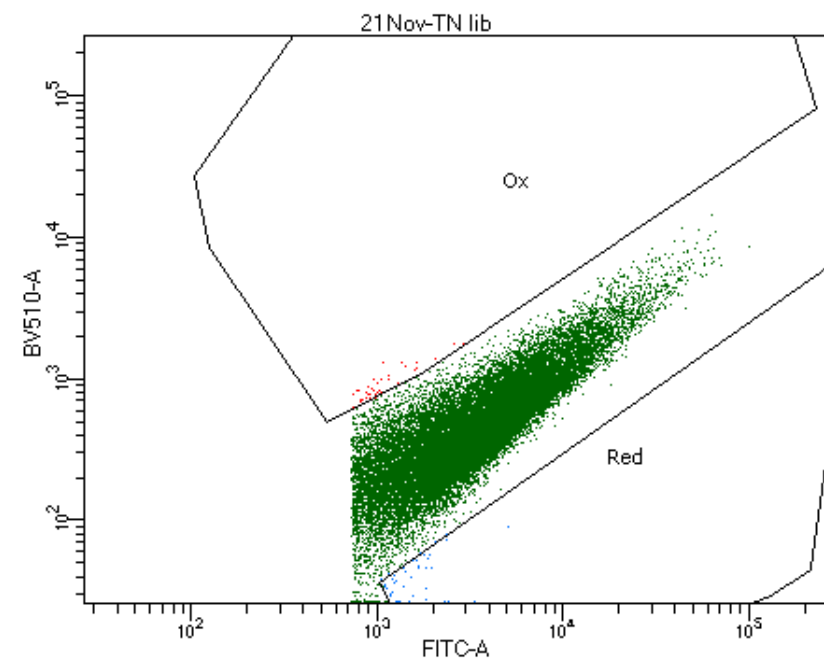

Tube: TN lib

| Population | #Events | %Parent | %Total |
|------------|---------|---------|--------|
| All Events | 59,864  | ####    | 100.0  |
| P          | 55,510  | 92.7    | 92.7   |
| S1         | 51,592  | 92.9    | 86.2   |
| S2         | 51,191  | 99.2    | 85.5   |
| S3         | 45,787  | 89.4    | 76.5   |
| S4         | 41,416  | 90.5    | 69.2   |
| GFP+       | 28,203  | 68.1    | 47.1   |
| Ox         | 37      | 0.1     | 0.1    |
| Red        | 47      | 0.2     | 0.1    |

|                  |                                 |
|------------------|---------------------------------|
| Experiment Name: | 21Nov2016 Bac sorting           |
| Specimen Name:   | 21Nov                           |
| Tube Name:       | TN lib                          |
| Record Date:     | Nov 21, 2016 2:34:30 PM         |
| SOP:             | Administrator                   |
| GUID:            | 758ac635-90fc-4e2f-9da8-7906... |

  

| Population | #Events | %Parent | FITC-A<br>Median | BV510-A<br>Median |
|------------|---------|---------|------------------|-------------------|
| S4         | 41,416  | 90.5    | 1,890            | 275               |
| GFP+       | 28,203  | 68.1    | 3,106            | 408               |
| Ox         | 37      | 0.1     | 958              | 822               |
| Red        | 47      | 0.2     | 1,456            | 39                |



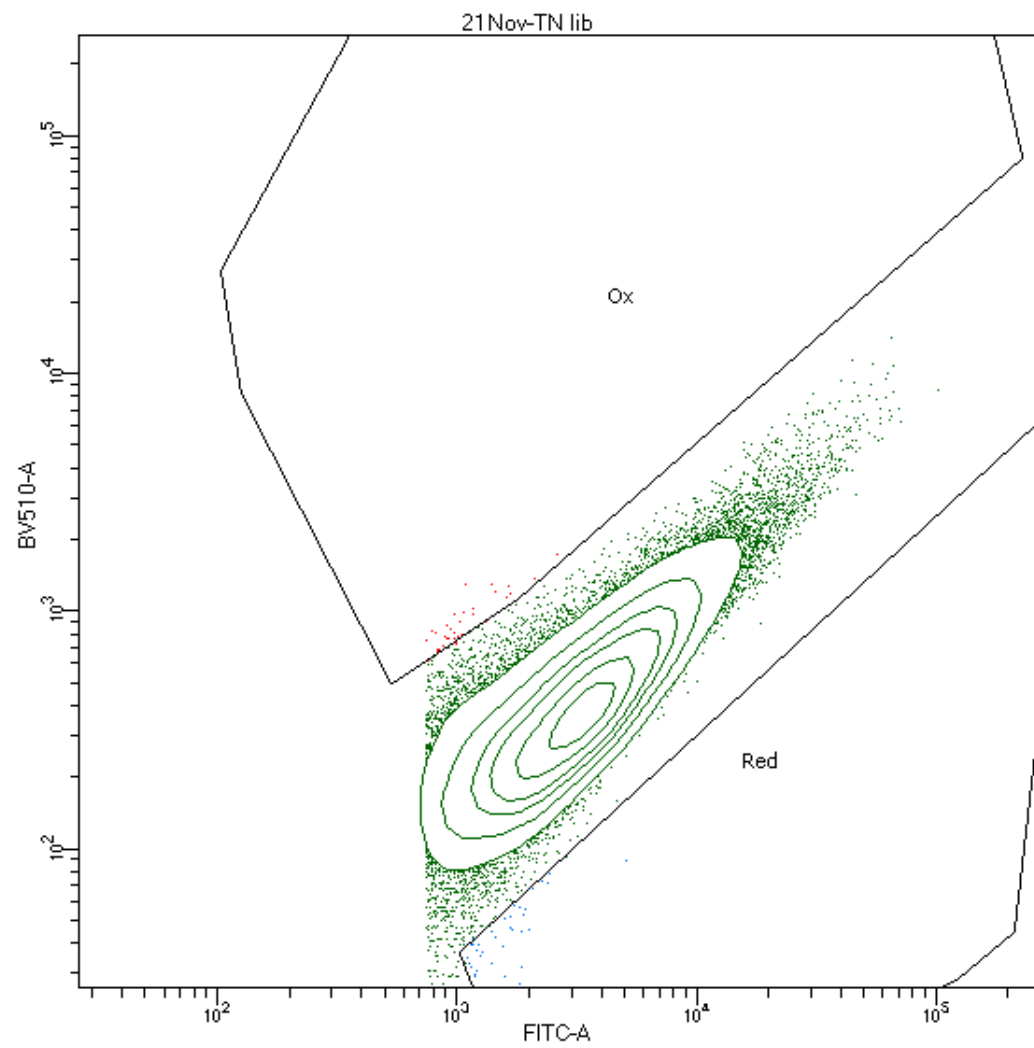

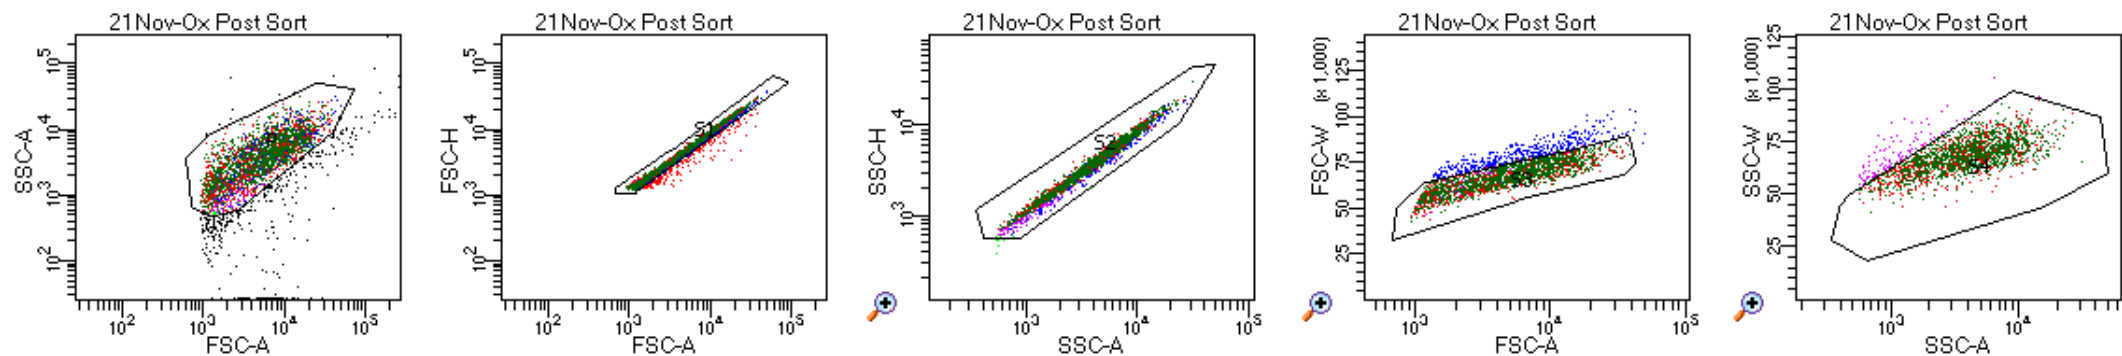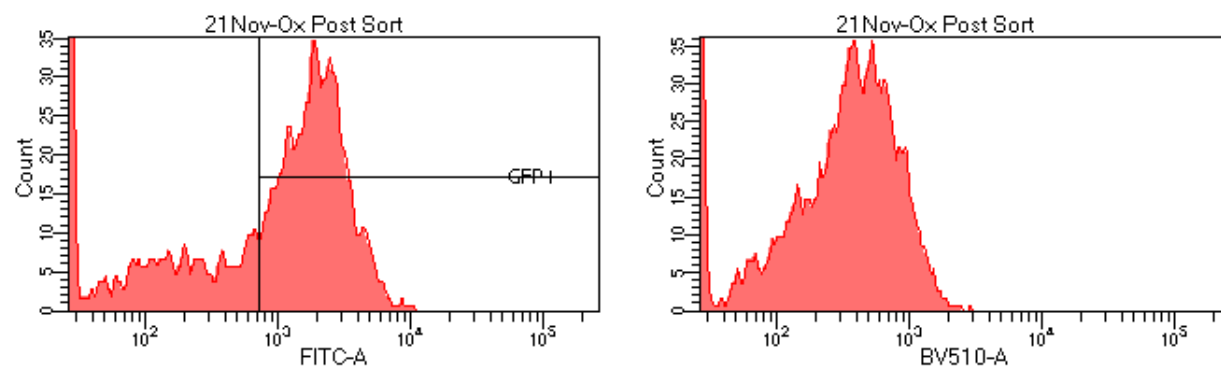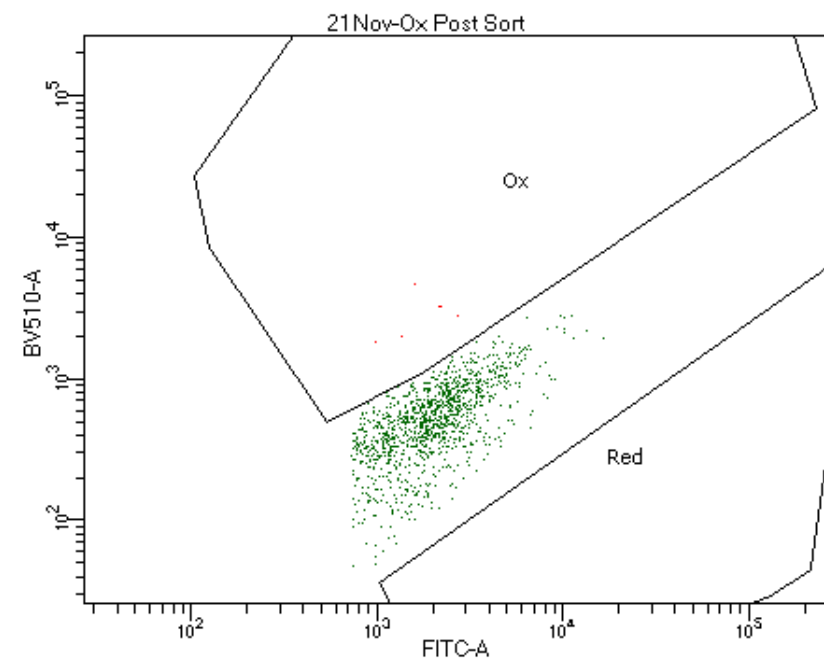

Tube: Ox Post Sort

| Population | #Events | %Parent | %Total |
|------------|---------|---------|--------|
| All Events | 3,117   | ####    | 100.0  |
| P          | 2,695   | 86.5    | 86.5   |
| S1         | 2,481   | 92.1    | 79.6   |
| S2         | 2,468   | 99.5    | 79.2   |
| S3         | 2,048   | 83.0    | 65.7   |
| S4         | 1,937   | 94.6    | 62.1   |
| GFP+       | 1,214   | 62.7    | 38.9   |
| Ox         | 6       | 0.5     | 0.2    |
| Red        | 0       | 0.0     | 0.0    |

|                  |                                |
|------------------|--------------------------------|
| Experiment Name: | 21Nov2016 Bac sorting          |
| Specimen Name:   | 21Nov                          |
| Tube Name:       | Ox Post Sort                   |
| Record Date:     | Nov 21, 2016 4:36:16 PM        |
| SOP:             | Administrator                  |
| GUID:            | d1ae7021-5e3d-41c2-a068-581... |

  

| Population | #Events | %Parent | FITC-A Median | BV510-A Median |
|------------|---------|---------|---------------|----------------|
| S4         | 1,937   | 94.6    | 1,182         | 354            |
| GFP+       | 1,214   | 62.7    | 1,931         | 507            |
| Ox         | 6       | 0.5     | 1,861         | 3,019          |
| Red        | 0       | 0.0     | ####          | ####           |

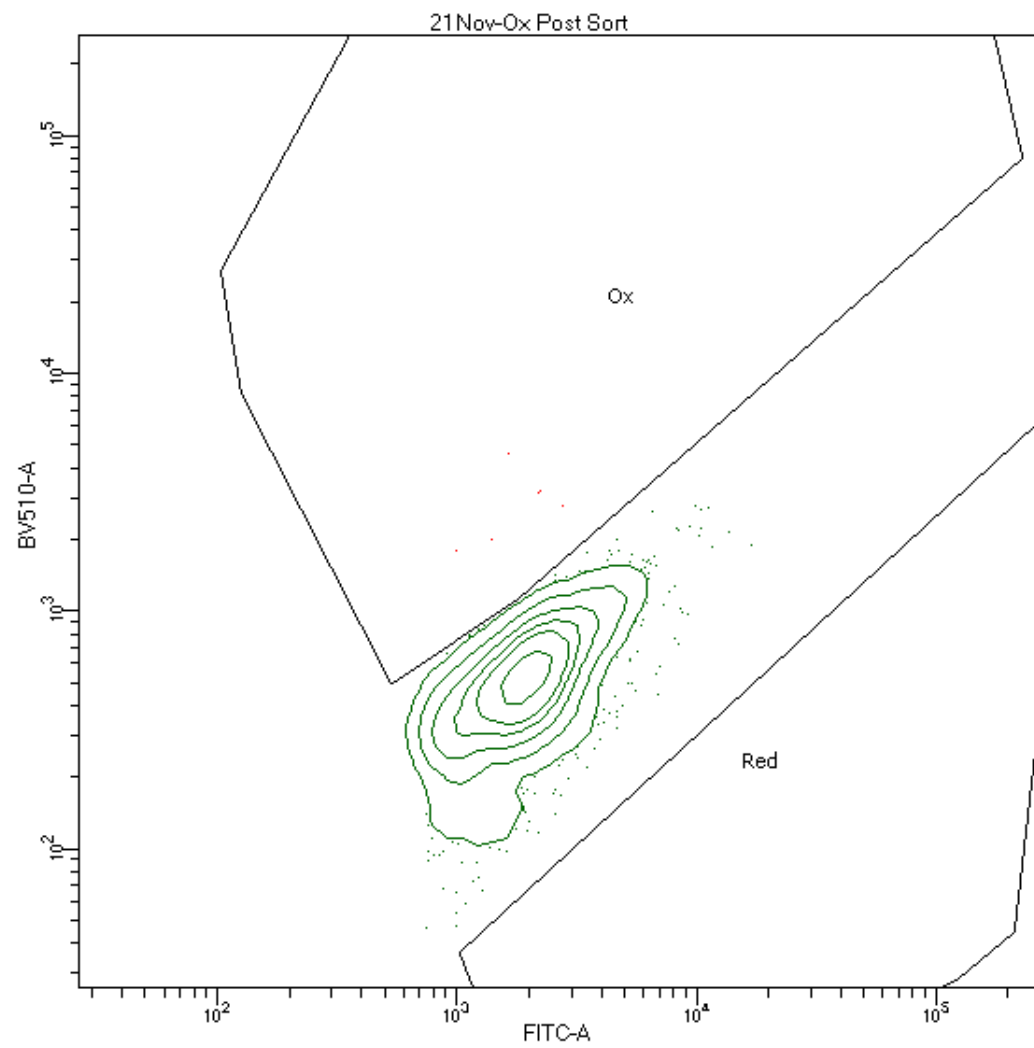

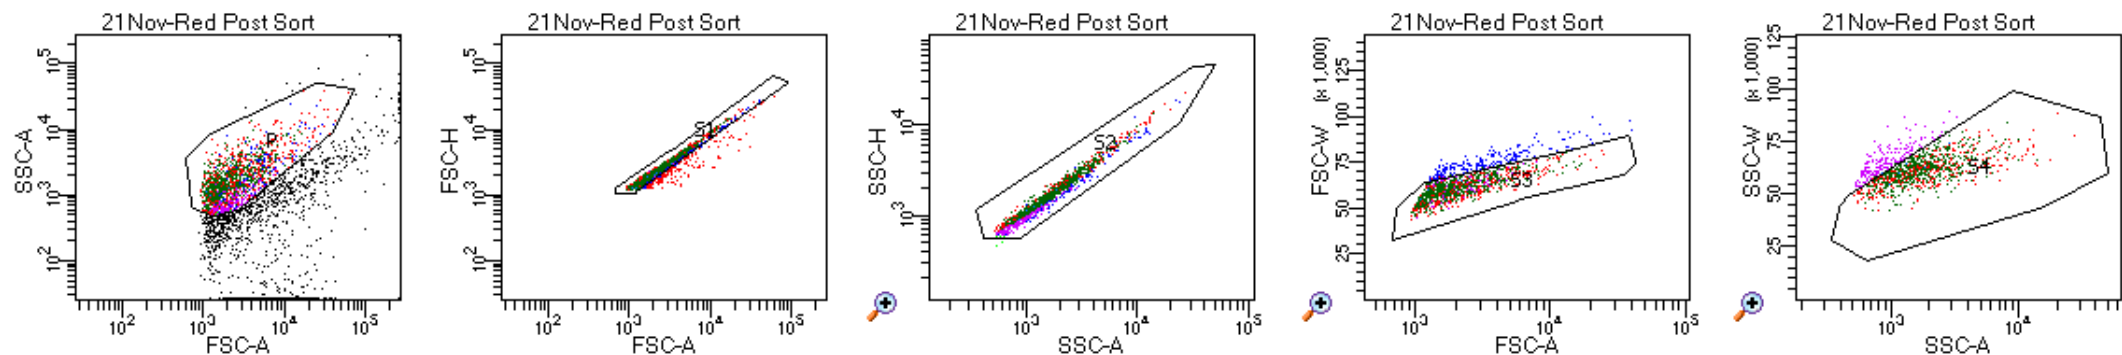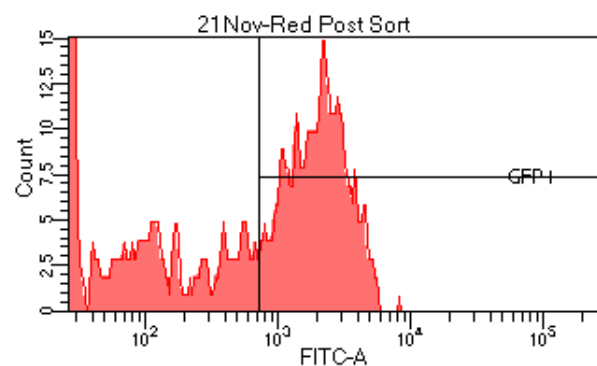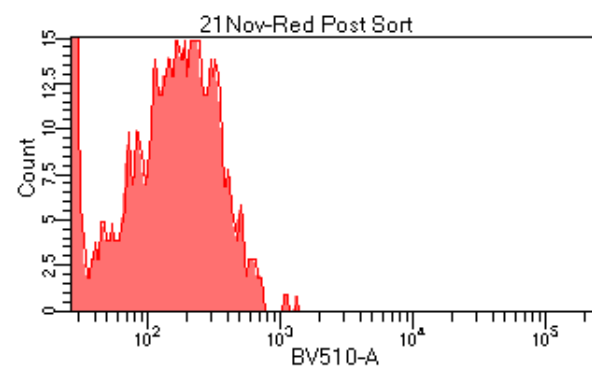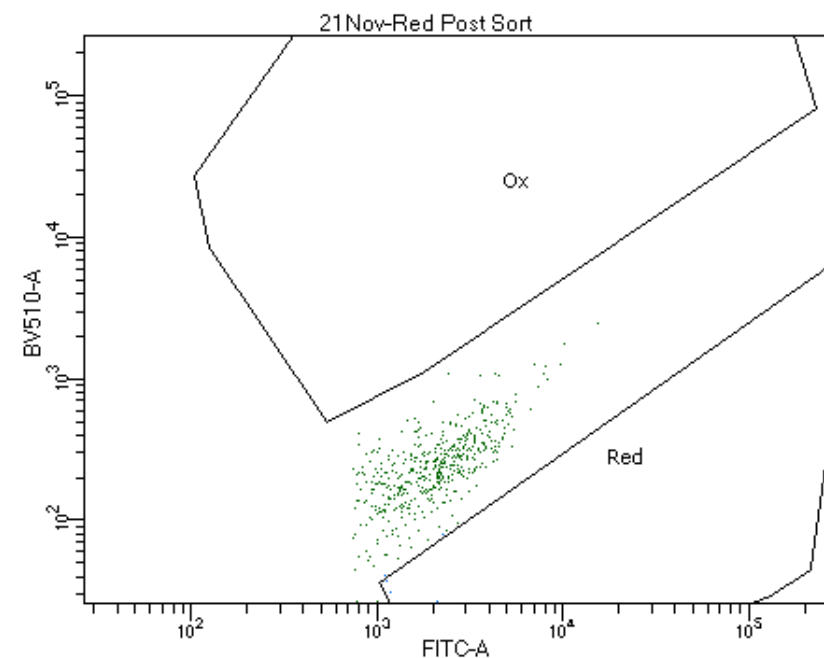

Tube: Red Post Sort

| Population | #Events | %Parent | %Total |
|------------|---------|---------|--------|
| All Events | 2,960   | ####    | 100.0  |
| P          | 1,549   | 52.3    | 52.3   |
| S1         | 1,349   | 87.1    | 45.6   |
| S2         | 1,339   | 99.3    | 45.2   |
| S3         | 1,132   | 84.5    | 38.2   |
| S4         | 940     | 83.0    | 31.8   |
| GFP+       | 483     | 51.4    | 16.3   |
| Ox         | 0       | 0.0     | 0.0    |
| Red        | 6       | 1.2     | 0.2    |

Experiment Name: 21Nov2016 Bac sorting  
 Specimen Name: 21Nov  
 Tube Name: Red Post Sort  
 Record Date: Nov 21, 2016 4:37:09 PM  
 SOP: Administrator  
 GUID: a6087b50-f85d-4a1f-8b21-8c89...

| Population | #Events | %Parent | FITC-A Median | BV510-A Median |
|------------|---------|---------|---------------|----------------|
| S4         | 940     | 83.0    | 783           | 139            |
| GFP+       | 483     | 51.4    | 2,063         | 233            |
| Ox         | 0       | 0.0     | ####          | ####           |
| Red        | 6       | 1.2     | 1,546         | 39             |

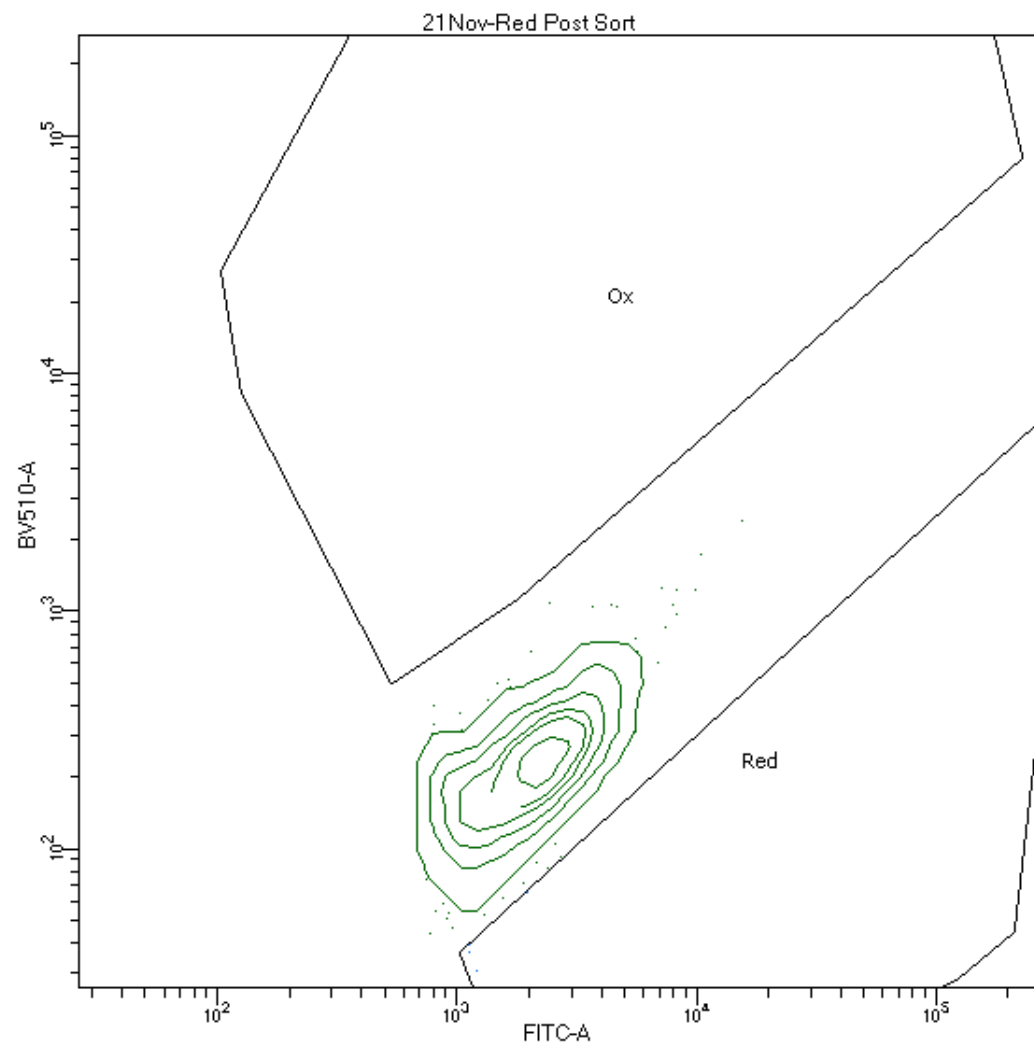

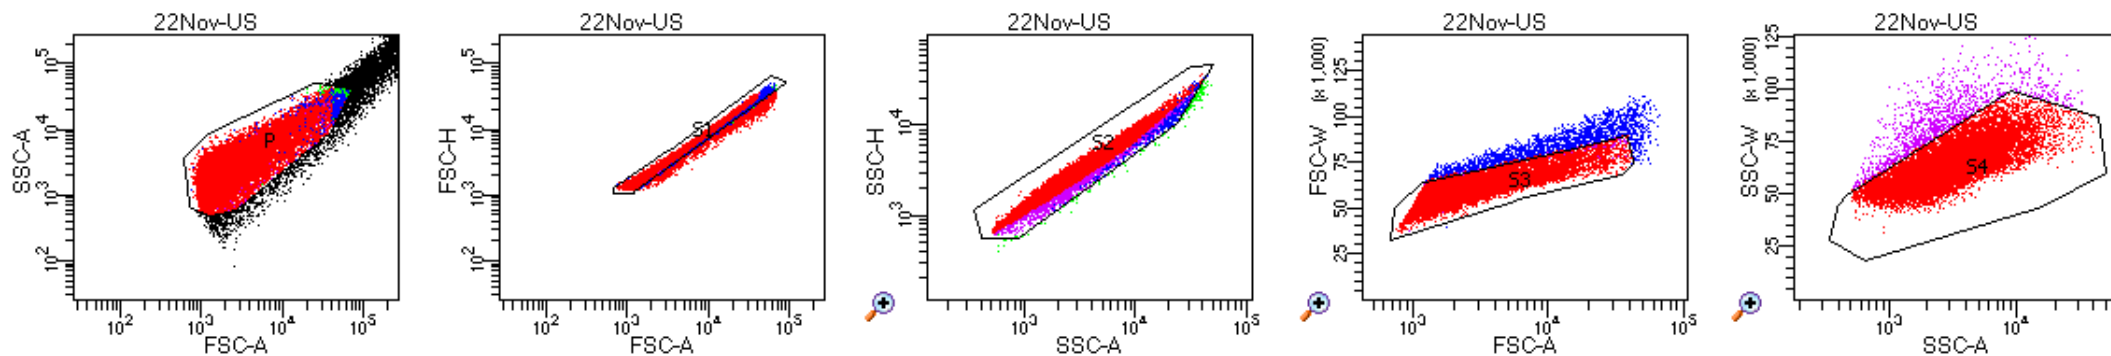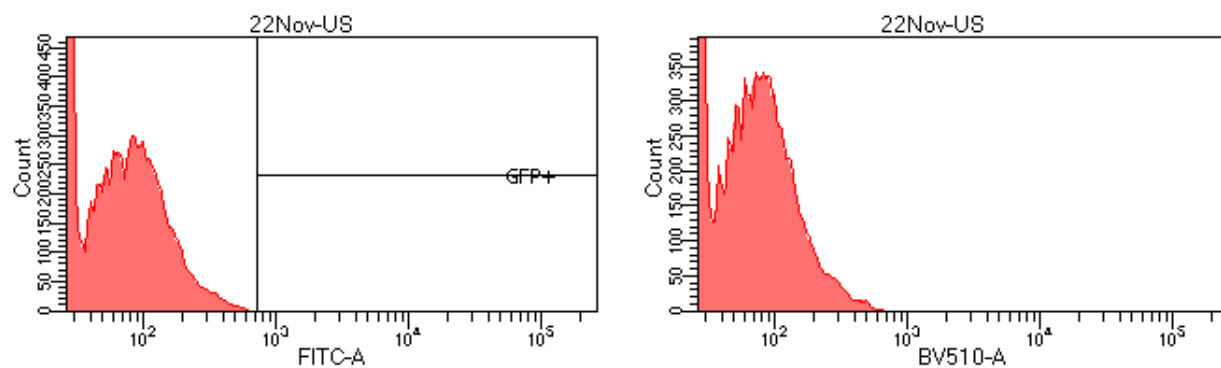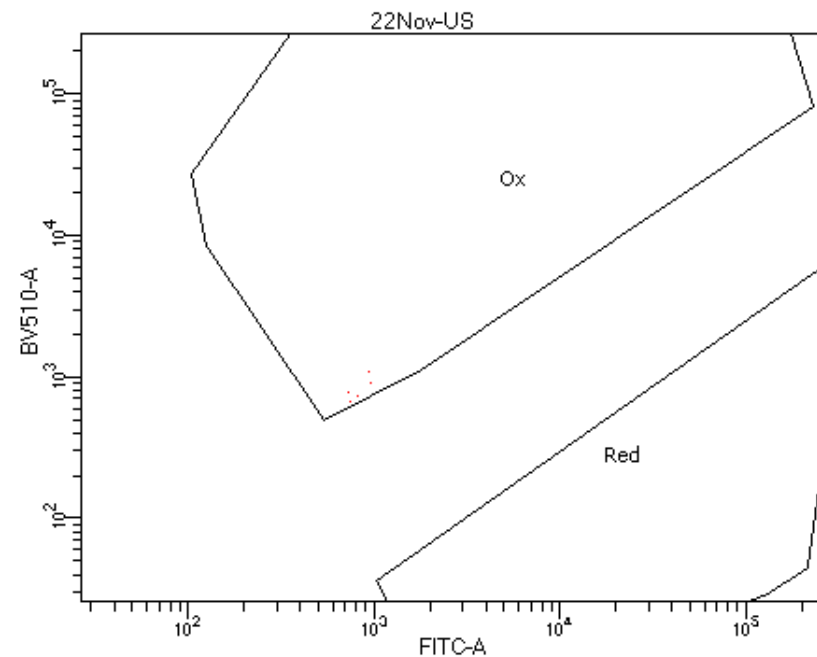

Tube: US

| Population | #Events | %Parent | %Total |
|------------|---------|---------|--------|
| All Events | 26,663  | ####    | 100.0  |
| P          | 22,243  | 83.4    | 83.4   |
| S1         | 20,748  | 93.3    | 77.8   |
| S2         | 20,558  | 99.1    | 77.1   |
| S3         | 18,774  | 91.3    | 70.4   |
| S4         | 17,638  | 93.9    | 66.2   |
| GFP+       | 5       | 0.0     | 0.0    |
| Ox         | 5       | 100.0   | 0.0    |
| Red        | 0       | 0.0     | 0.0    |

|                  |                                |  |  |  |
|------------------|--------------------------------|--|--|--|
| Experiment Name: | 21Nov2016 Bac sorting          |  |  |  |
| Specimen Name:   | 22Nov                          |  |  |  |
| Tube Name:       | US                             |  |  |  |
| Record Date:     | Nov 22, 2016 2:12:56 PM        |  |  |  |
| \$OP:            | Administrator                  |  |  |  |
| GUID:            | abdc656-7aff-4ad2-bb8e-6567... |  |  |  |

  

| Population                                                                                 | #Events | %Parent | FITC-A<br>Median | BV510-A<br>Median |
|--------------------------------------------------------------------------------------------|---------|---------|------------------|-------------------|
|  S4   | 17,638  | 93.9    | 58               | 61                |
|  GFP+ | 5       | 0.0     | 797              | 776               |
|  Ox   | 5       | 100.0   | 797              | 776               |
|  Red  | 0       | 0.0     | ####             | ####              |

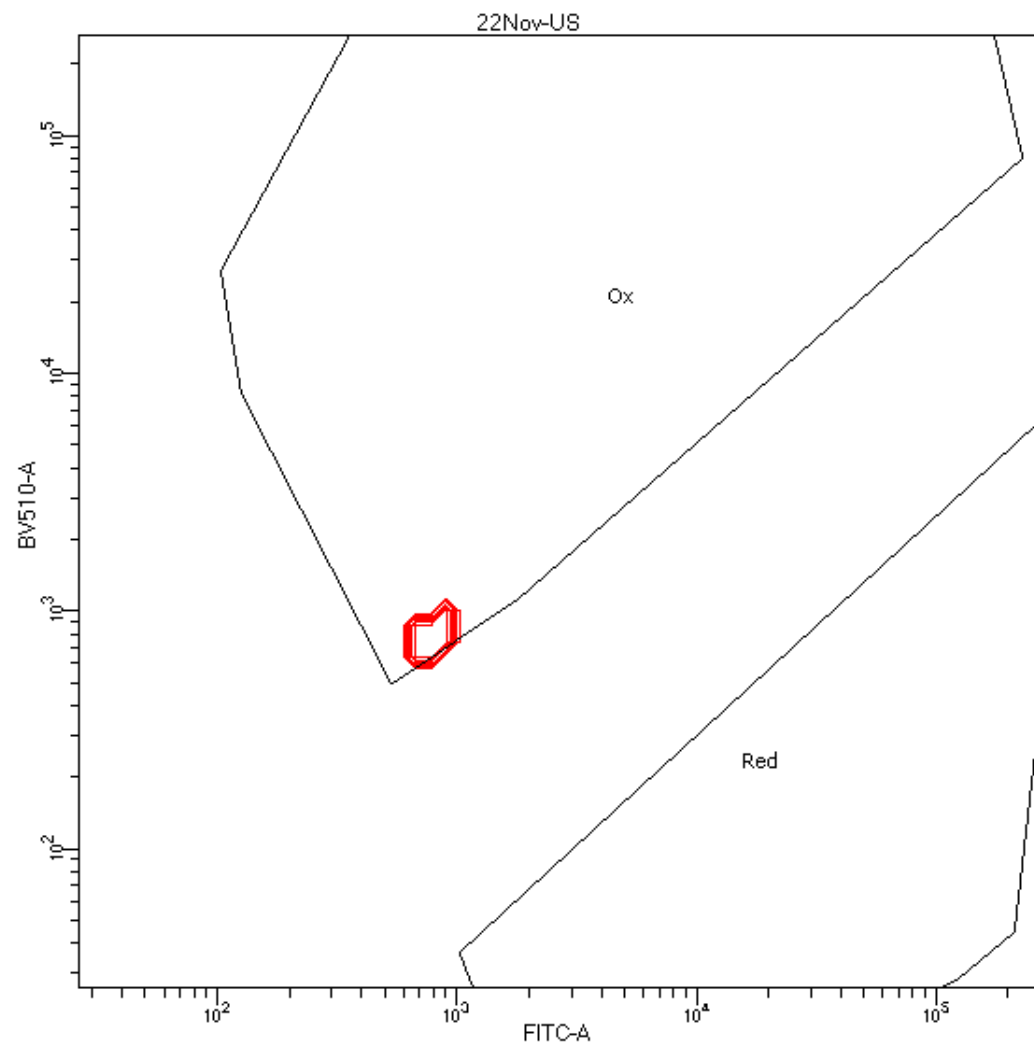

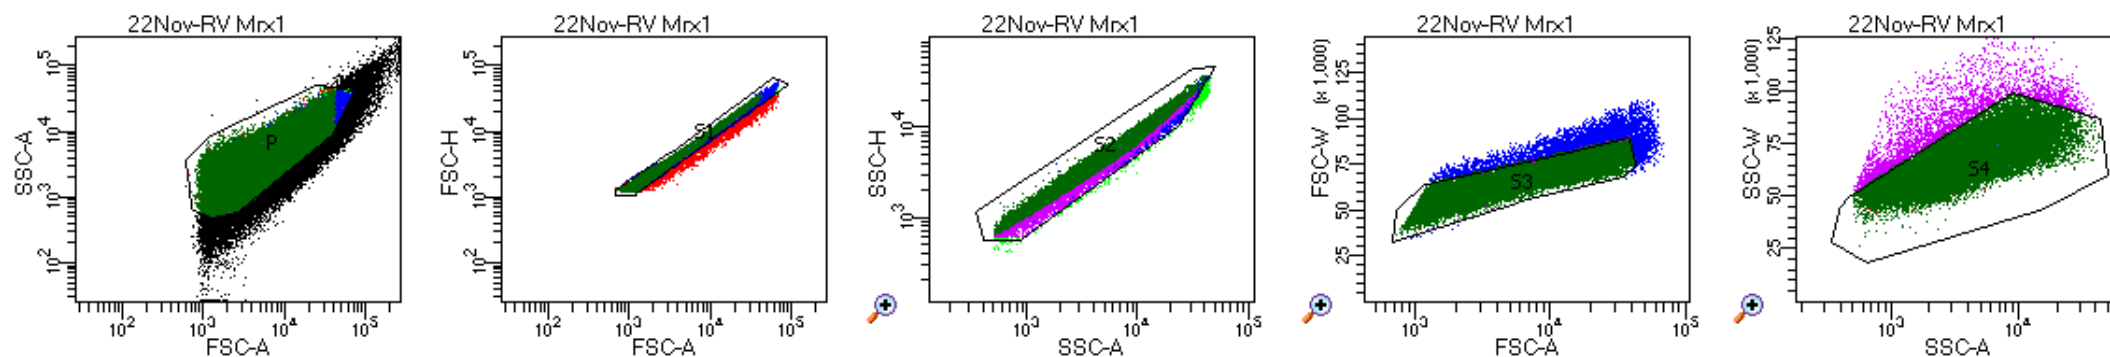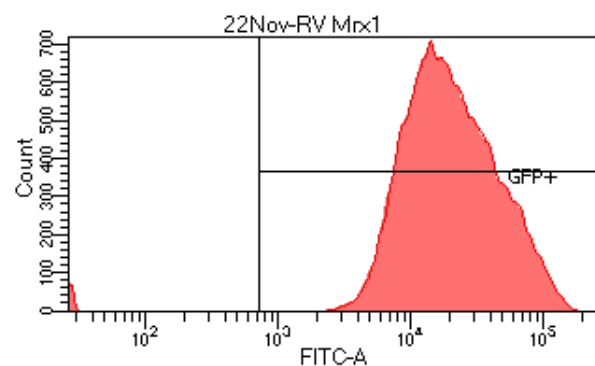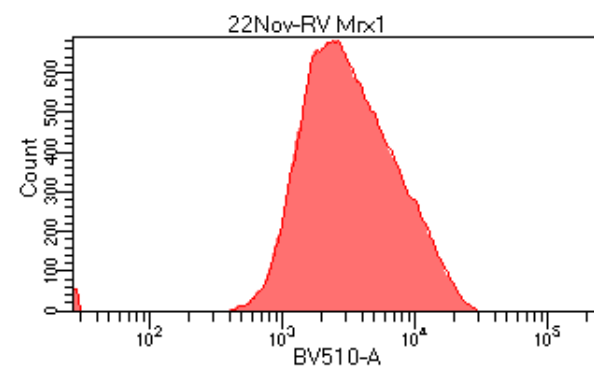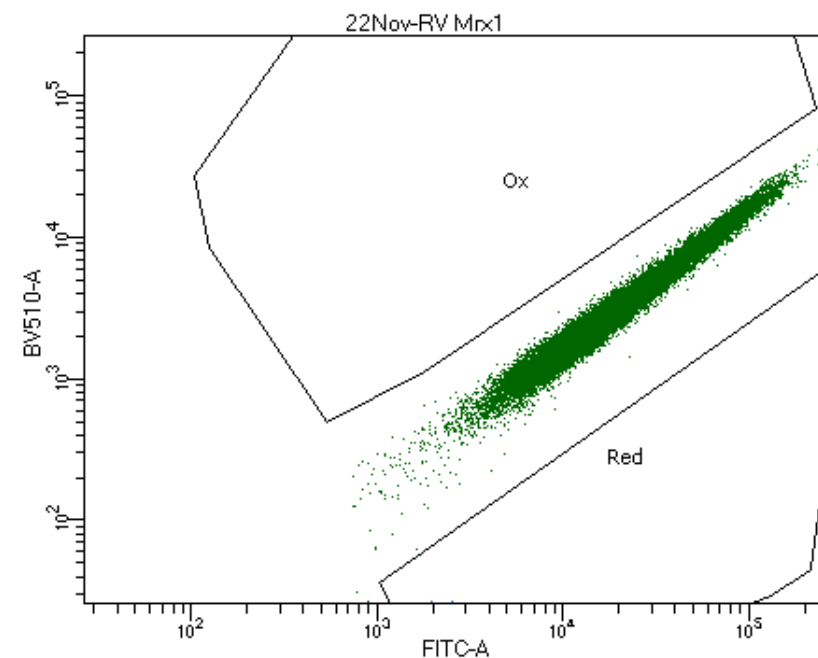

Tube: RV Mrx1

| Population | #Events | %Parent | %Total |
|------------|---------|---------|--------|
| All Events | 58,229  | ####    | 100.0  |
| P          | 47,601  | 81.7    | 81.7   |
| S1         | 45,562  | 95.7    | 78.2   |
| S2         | 45,024  | 98.8    | 77.3   |
| S3         | 41,130  | 91.4    | 70.6   |
| S4         | 38,397  | 93.4    | 65.9   |
| GFP+       | 38,169  | 99.4    | 65.5   |
| Ox         | 0       | 0.0     | 0.0    |
| Red        | 2       | 0.0     | 0.0    |

Experiment Name: 21Nov2016 Bac sorting  
 Specimen Name: 22Nov  
 Tube Name: RV Mrx1  
 Record Date: Nov 22, 2016 2:13:47 PM  
 SOP: Administrator  
 GUID: f42a0f51-a1bd-4ccf-a128-adba...

| Population | #Events | %Parent | FITC-A<br>Median | BV510-A<br>Median |
|------------|---------|---------|------------------|-------------------|
| S4         | 38,397  | 93.4    | 18,230           | 2,882             |
| GFP+       | 38,169  | 99.4    | 18,334           | 2,898             |
| Ox         | 0       | 0.0     | ####             | ####              |
| Red        | 2       | 0.0     | 2,222            | 15                |



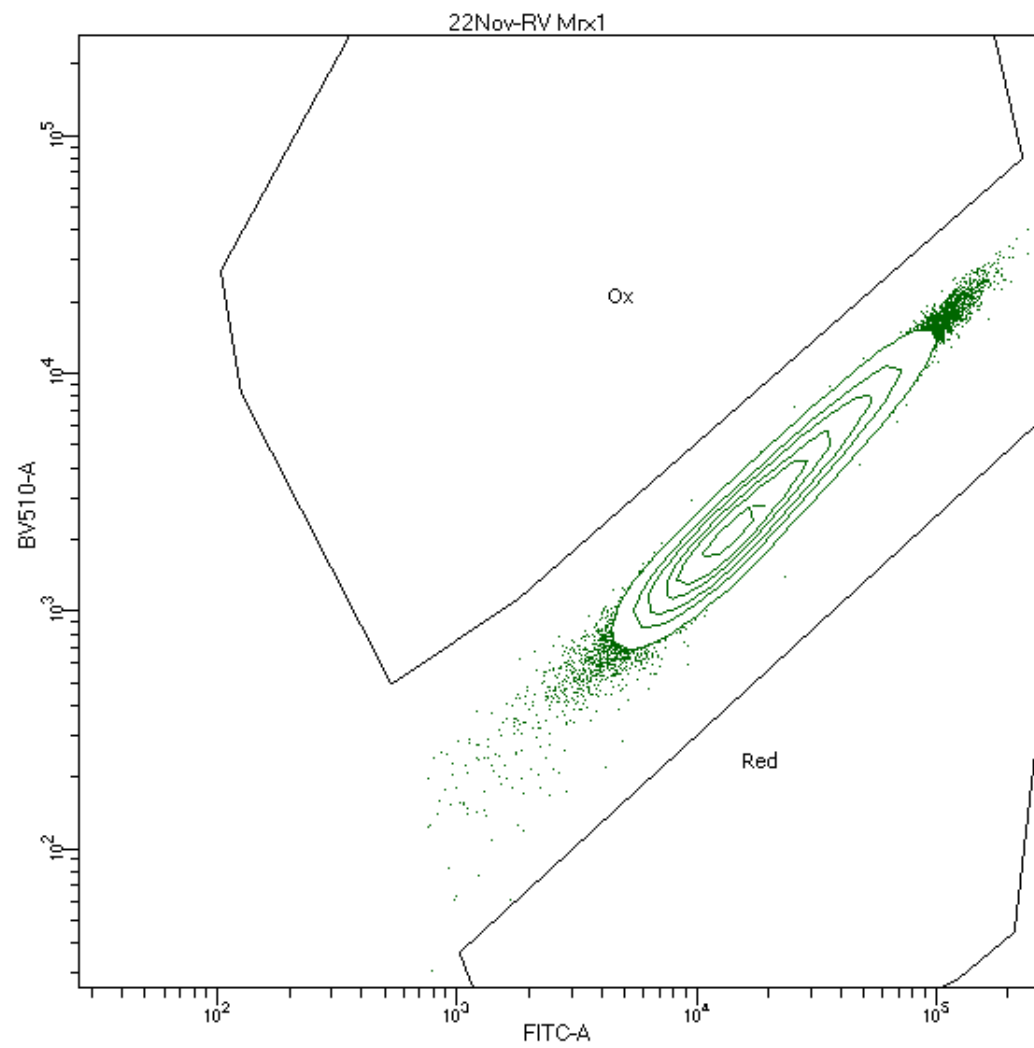

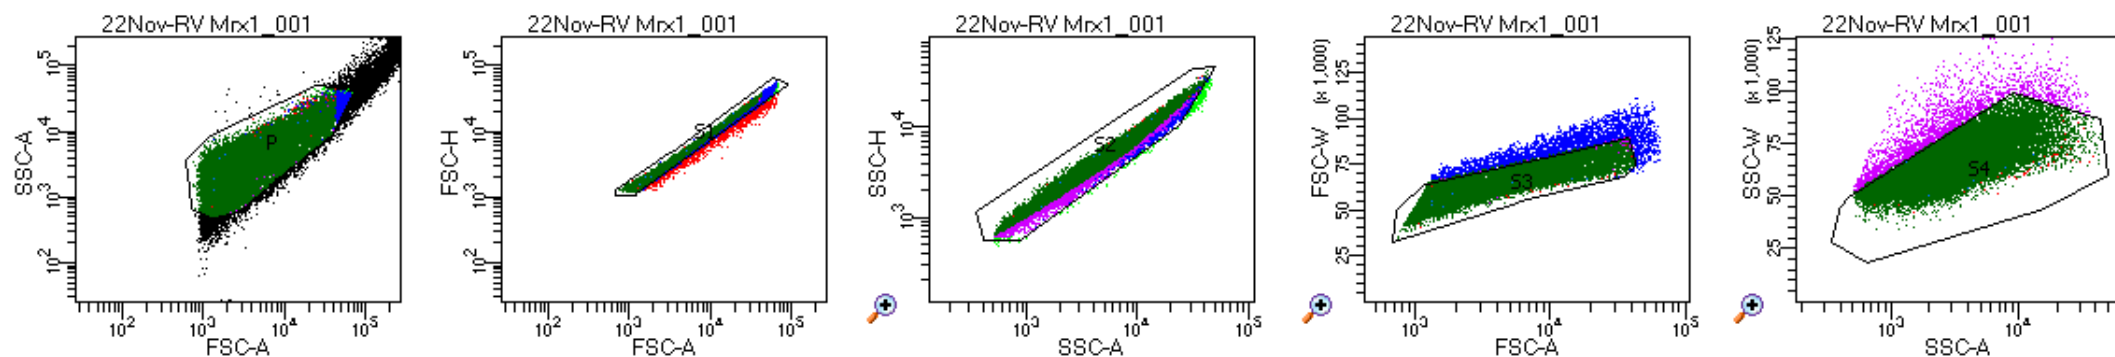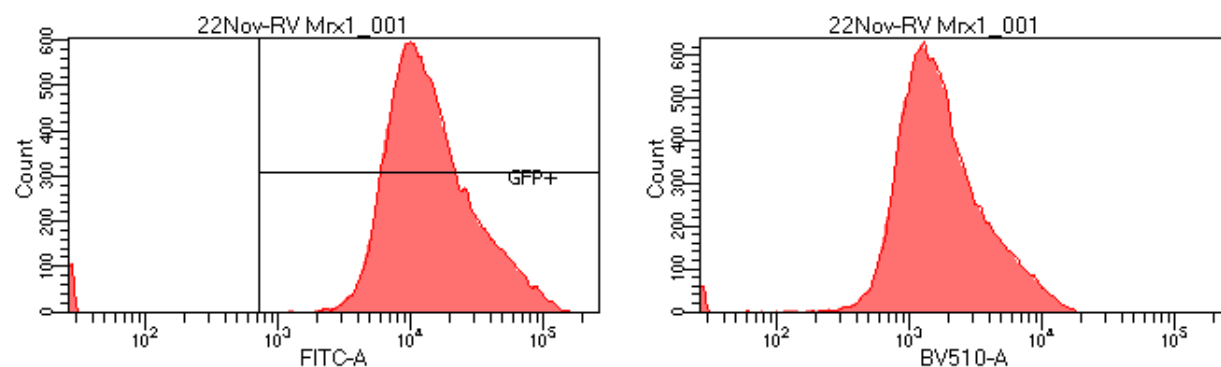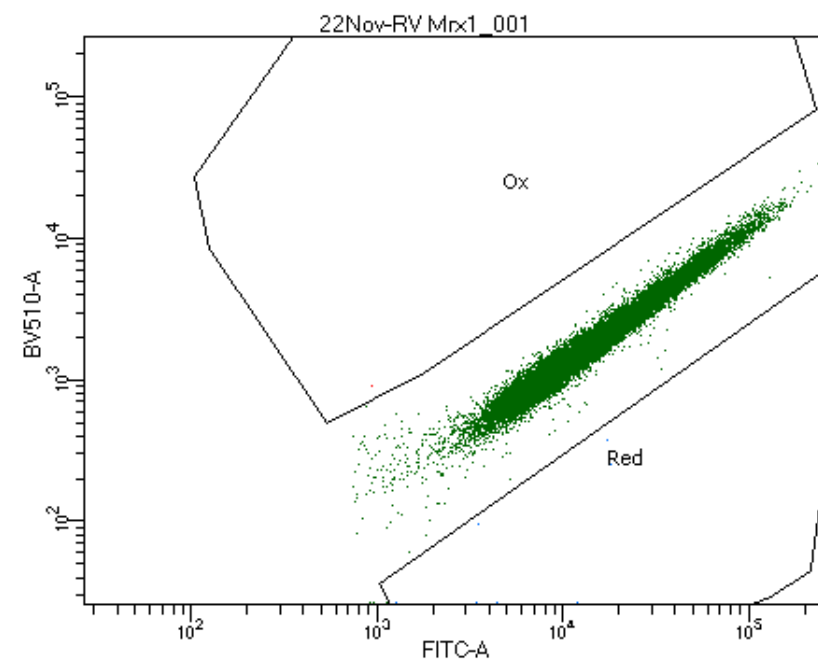

Tube: RV Mrx1\_001

| Population | #Events | %Parent | %Total |
|------------|---------|---------|--------|
| All Events | 39,651  | ####    | 100.0  |
| P          | 33,874  | 85.4    | 85.4   |
| S1         | 32,612  | 96.3    | 82.2   |
| S2         | 32,325  | 99.1    | 81.5   |
| S3         | 29,498  | 91.3    | 74.4   |
| S4         | 27,393  | 92.9    | 69.1   |
| GFP+       | 26,964  | 98.4    | 68.0   |
| Ox         | 2       | 0.0     | 0.0    |
| Red        | 7       | 0.0     | 0.0    |

Experiment Name: 21Nov2016 Bac sorting  
 Specimen Name: 22Nov  
 Tube Name: RV Mrx1\_001  
 Record Date: Nov 22, 2016 2:14:30 PM  
 SOP: Administrator  
 GUID: 9ea0558d-f759-42c4-ba02-f3fa...

| Population | #Events | %Parent | FITC-A<br>Median | BV510-A<br>Median |
|------------|---------|---------|------------------|-------------------|
| S4         | 27,393  | 92.9    | 12,166           | 1,504             |
| GFP+       | 26,964  | 98.4    | 12,346           | 1,522             |
| Ox         | 2       | 0.0     | 2,340            | 1,520             |
| Red        | 7       | 0.0     | 4,335            | -66               |

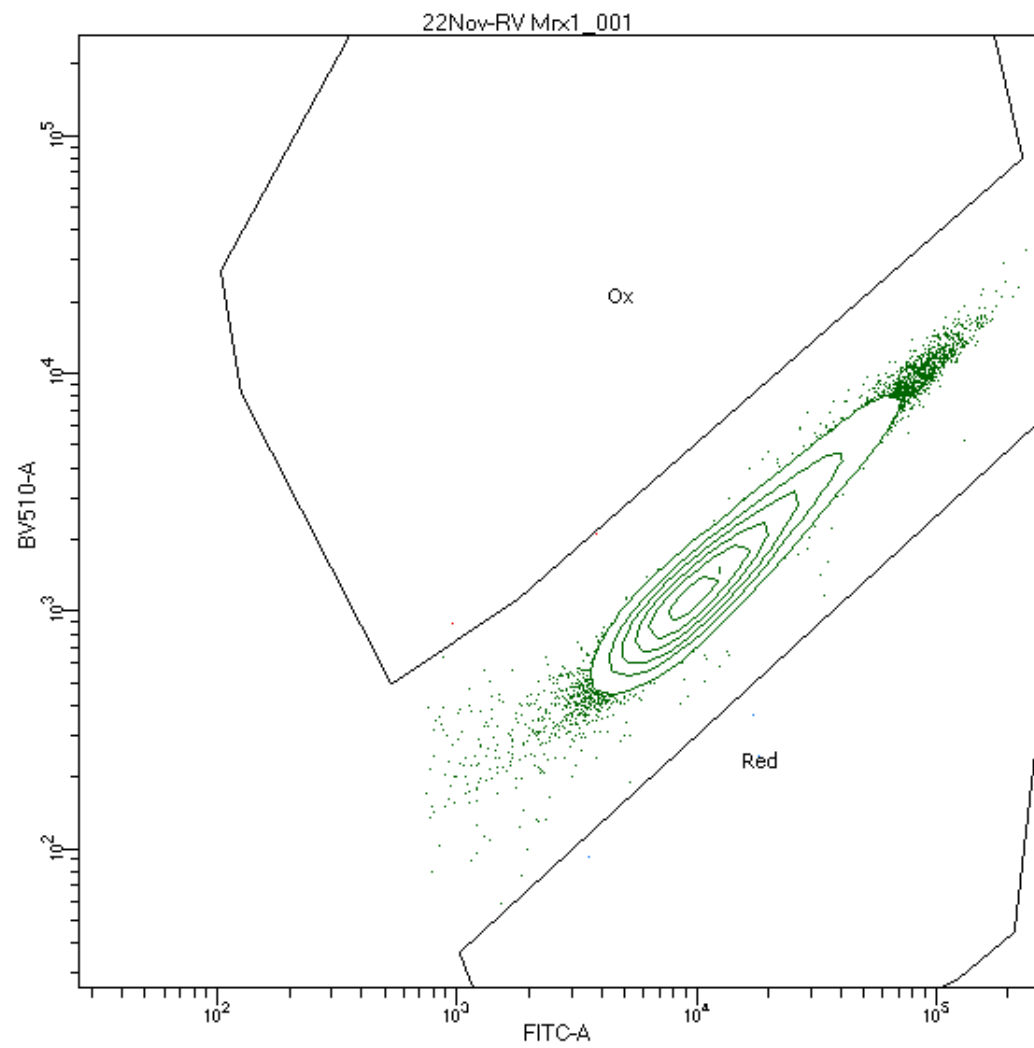

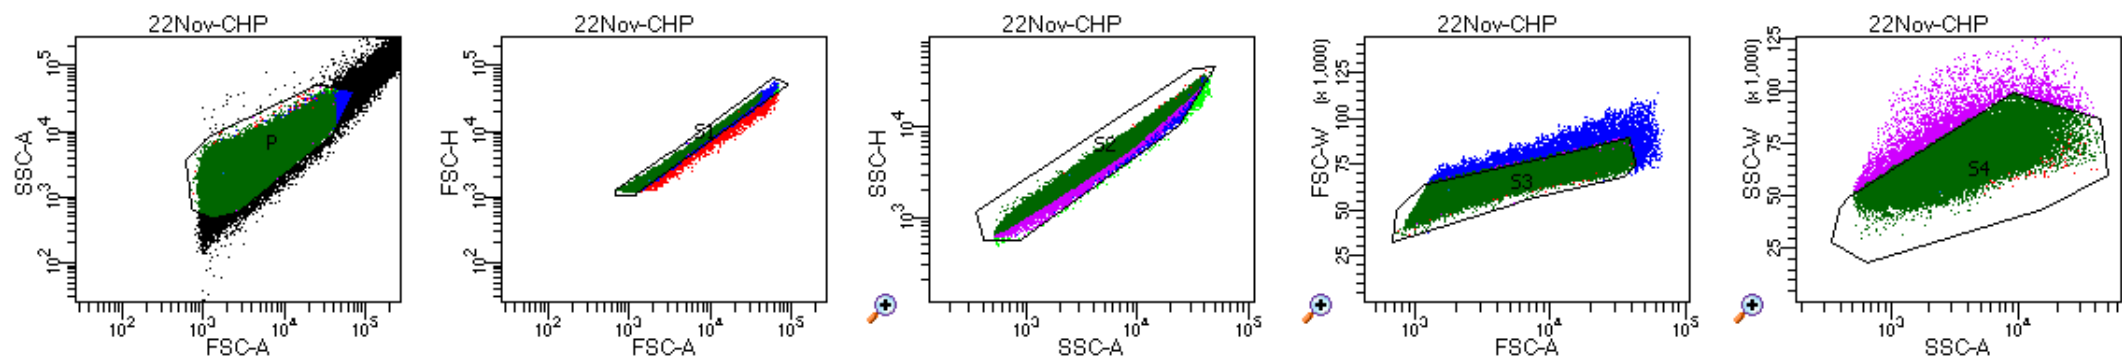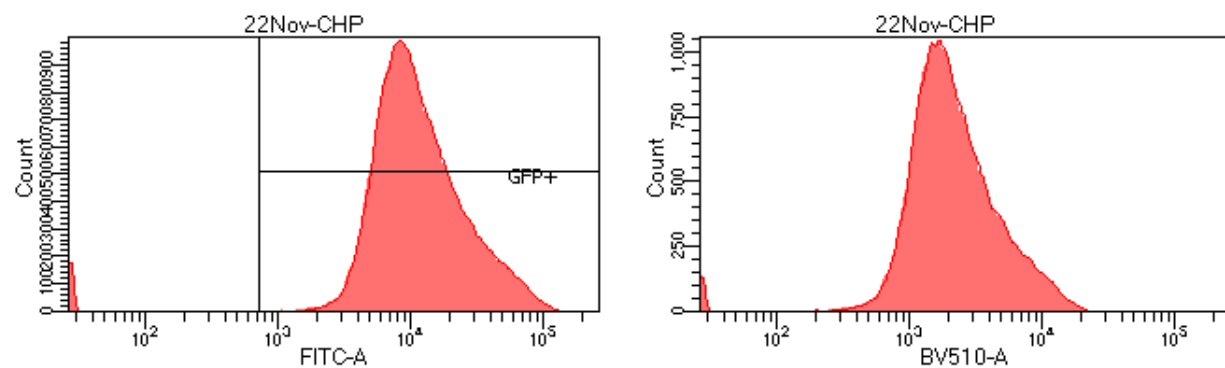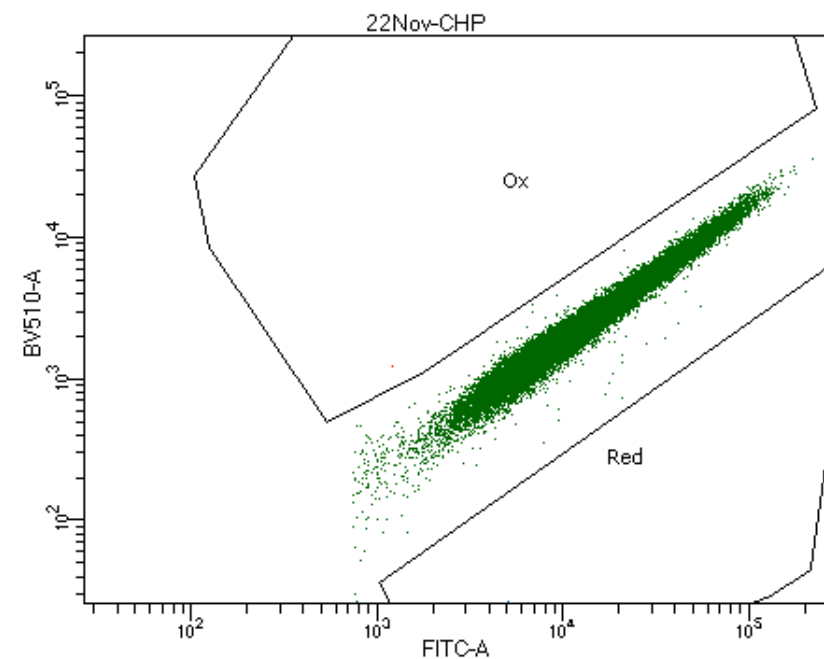

Tube: CHP

| Population | #Events | %Parent | %Total |
|------------|---------|---------|--------|
| All Events | 66,284  | ####    | 100.0  |
| P          | 56,534  | 85.3    | 85.3   |
| S1         | 54,350  | 96.1    | 82.0   |
| S2         | 53,907  | 99.2    | 81.3   |
| S3         | 48,940  | 90.8    | 73.8   |
| S4         | 45,298  | 92.6    | 68.3   |
| GFP+       | 44,582  | 98.4    | 67.3   |
| Ox         | 1       | 0.0     | 0.0    |
| Red        | 1       | 0.0     | 0.0    |

|                  |                                |
|------------------|--------------------------------|
| Experiment Name: | 21Nov2016 Bac sorting          |
| Specimen Name:   | 22Nov                          |
| Tube Name:       | CHP                            |
| Record Date:     | Nov 22, 2016 2:15:51 PM        |
| SOP:             | Administrator                  |
| GUID:            | 3120bf0a-a58c-44c6-a53e-97e... |

  

| Population | #Events | %Parent | FITC-A Median | BV510-A Median |
|------------|---------|---------|---------------|----------------|
| S4         | 45,298  | 92.6    | 10,022        | 1,886          |
| GFP+       | 44,582  | 98.4    | 10,177        | 1,910          |
| Ox         | 1       | 0.0     | 1,176         | 1,231          |
| Red        | 1       | 0.0     | 5,048         | 1              |

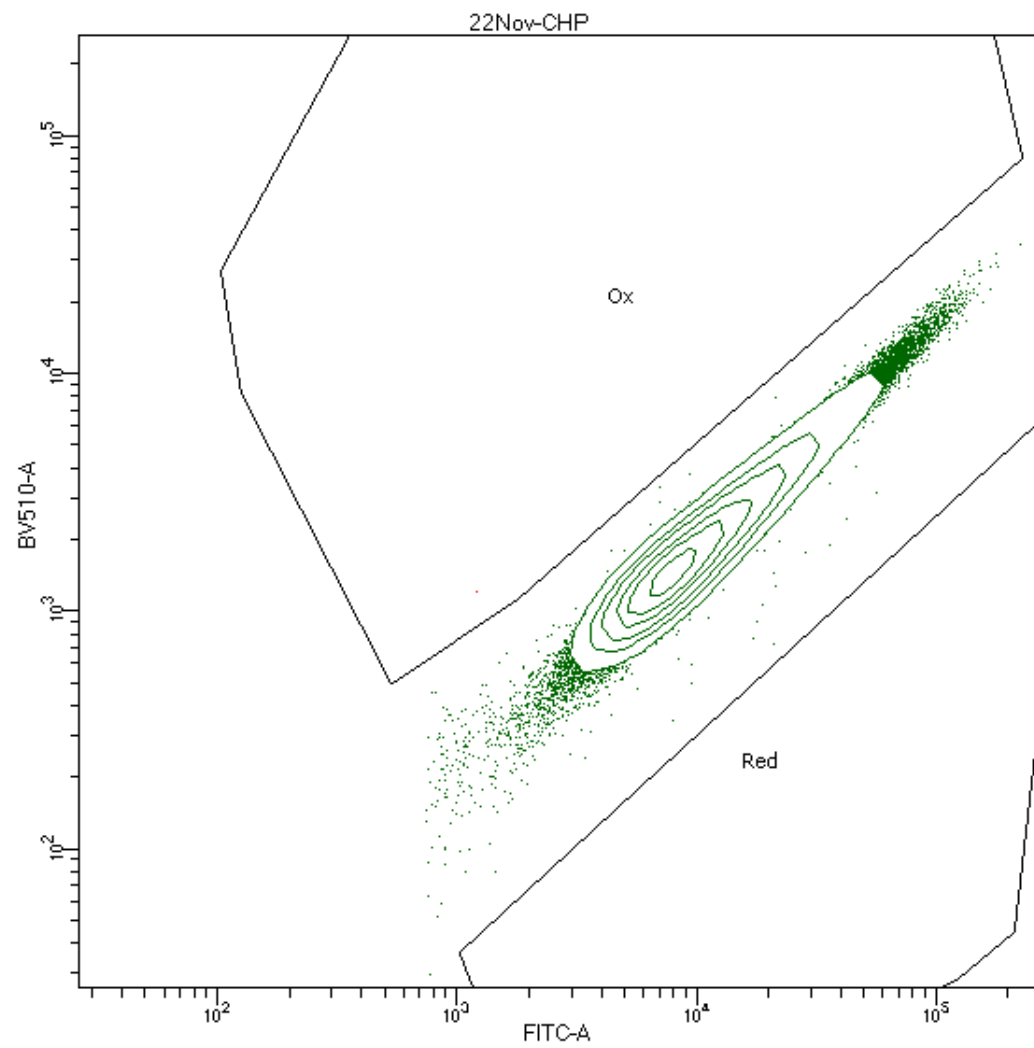

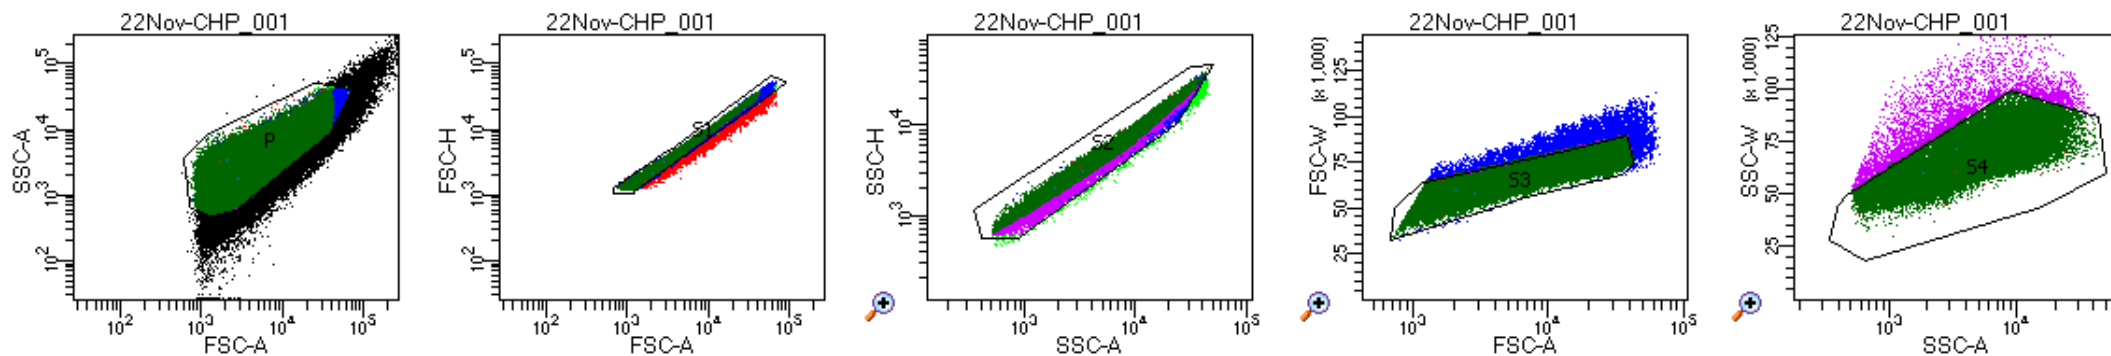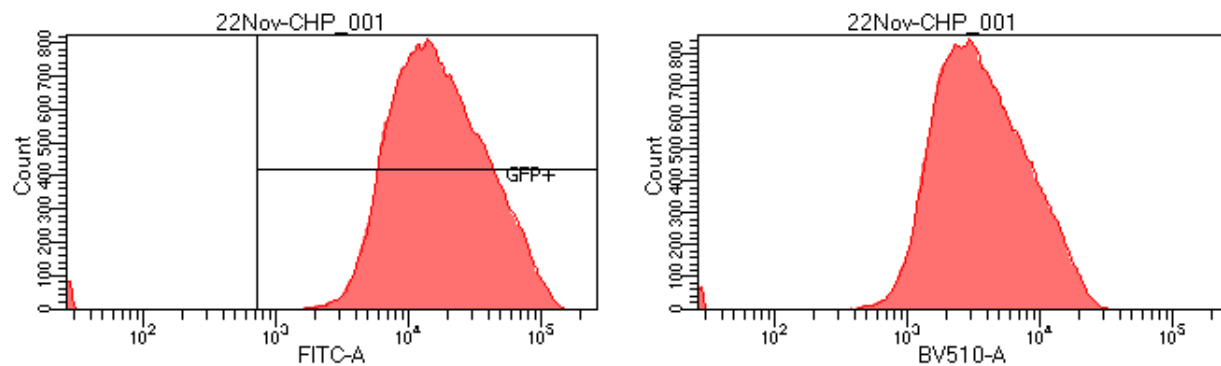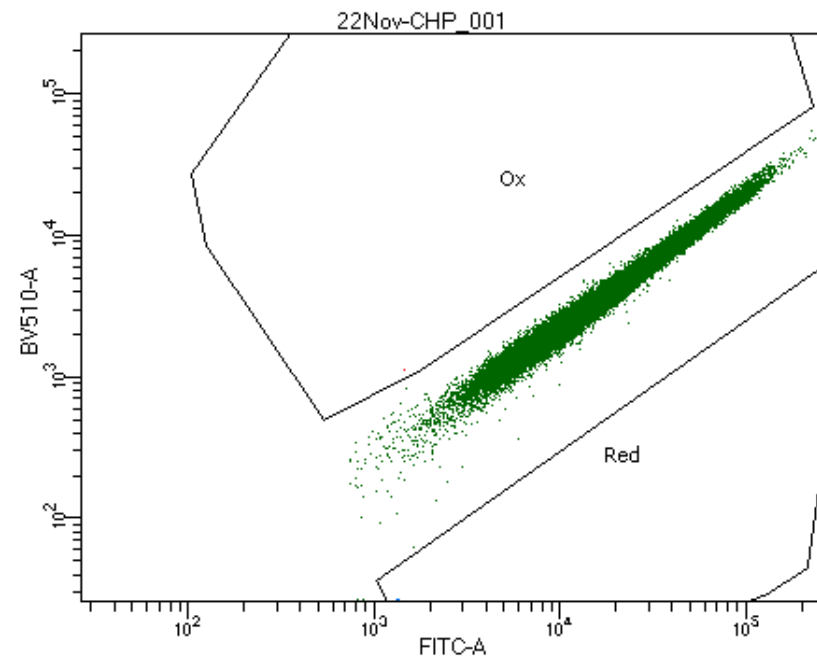

Tube: CHP\_001

| Population | #Events | %Parent | %Total |
|------------|---------|---------|--------|
| All Events | 71,712  | ####    | 100.0  |
| P          | 59,410  | 82.8    | 82.8   |
| S1         | 56,740  | 95.5    | 79.1   |
| S2         | 56,019  | 98.7    | 78.1   |
| S3         | 50,959  | 91.0    | 71.1   |
| S4         | 47,550  | 93.3    | 66.3   |
| GFP+       | 47,237  | 99.3    | 65.9   |
| Ox         | 1       | 0.0     | 0.0    |
| Red        | 2       | 0.0     | 0.0    |

|                  |                                  |
|------------------|----------------------------------|
| Experiment Name: | 21Nov2016 Bac sorting            |
| Specimen Name:   | 22Nov                            |
| Tube Name:       | CHP_001                          |
| Record Date:     | Nov 22, 2016 2:16:24 PM          |
| \$OP:            | Administrator                    |
| GUID:            | 8f47f751-284c-4113-8ff0-8a146... |

| Population | #Events | %Parent | FITC-A<br>Median | BV510-A<br>Median |
|------------|---------|---------|------------------|-------------------|
| S4         | 47,550  | 93.3    | 15,447           | 3,260             |
| GFP+       | 47,237  | 99.3    | 15,544           | 3,283             |
| Ox         | 1       | 0.0     | 1,446            | 1,102             |
| Red        | 2       | 0.0     | 1,325            | -66               |

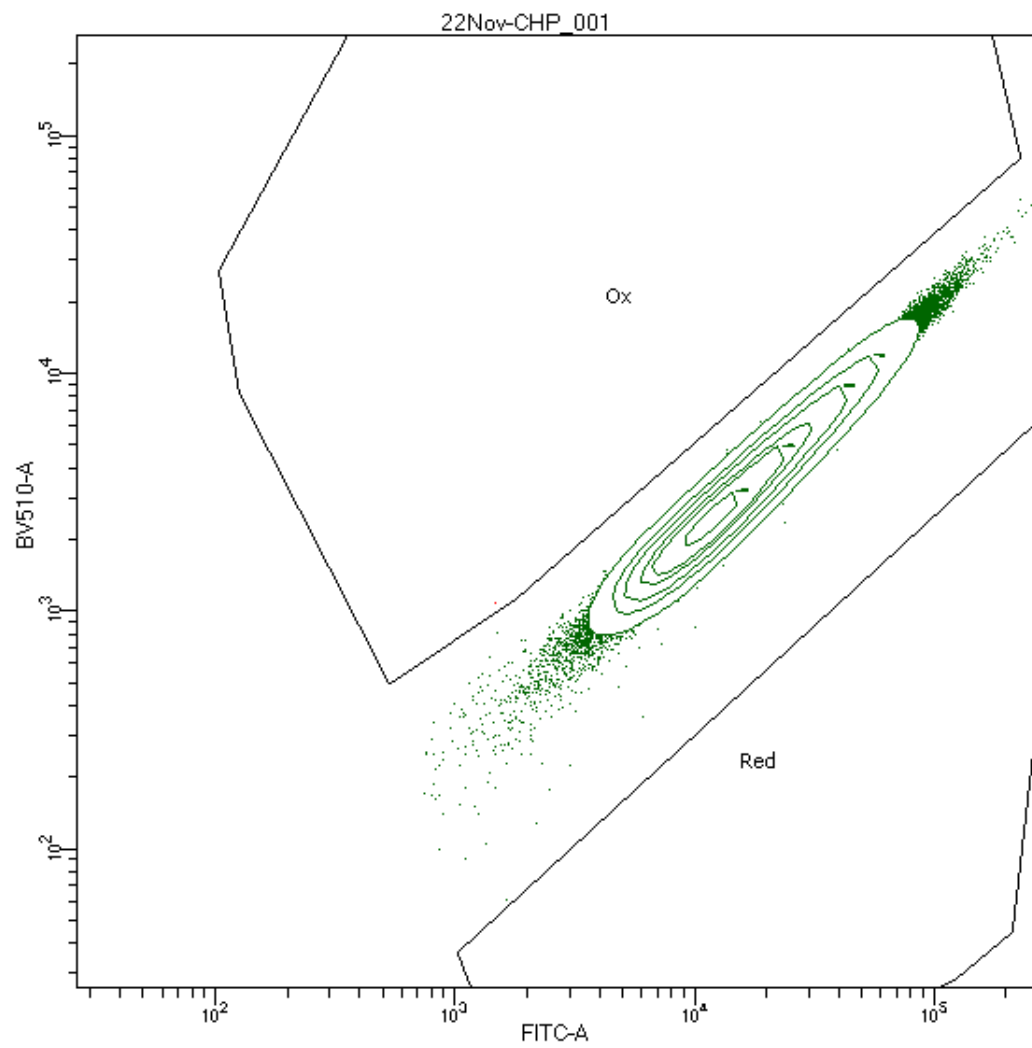

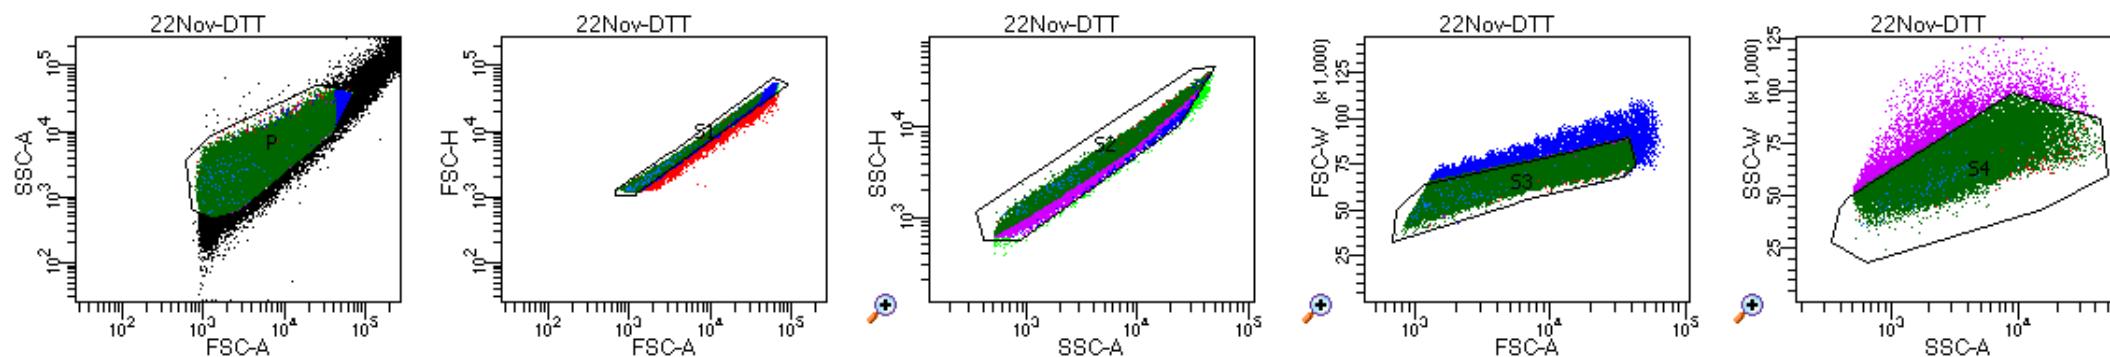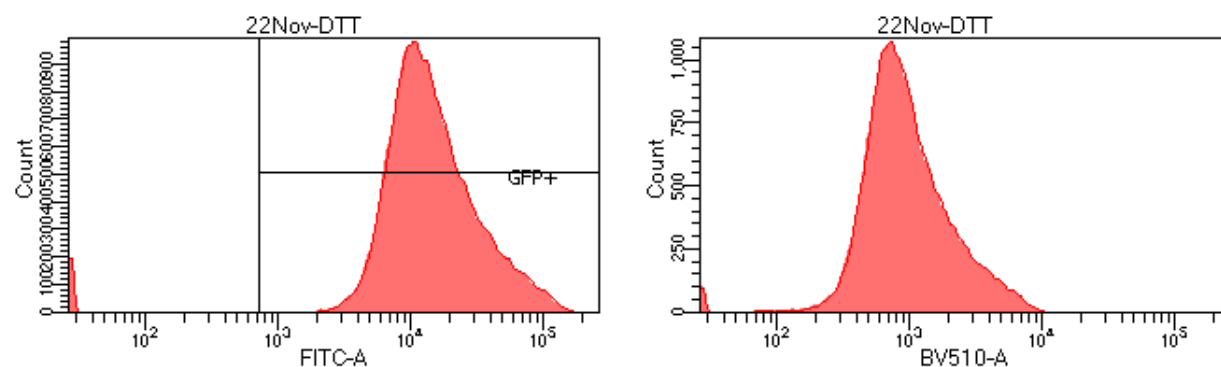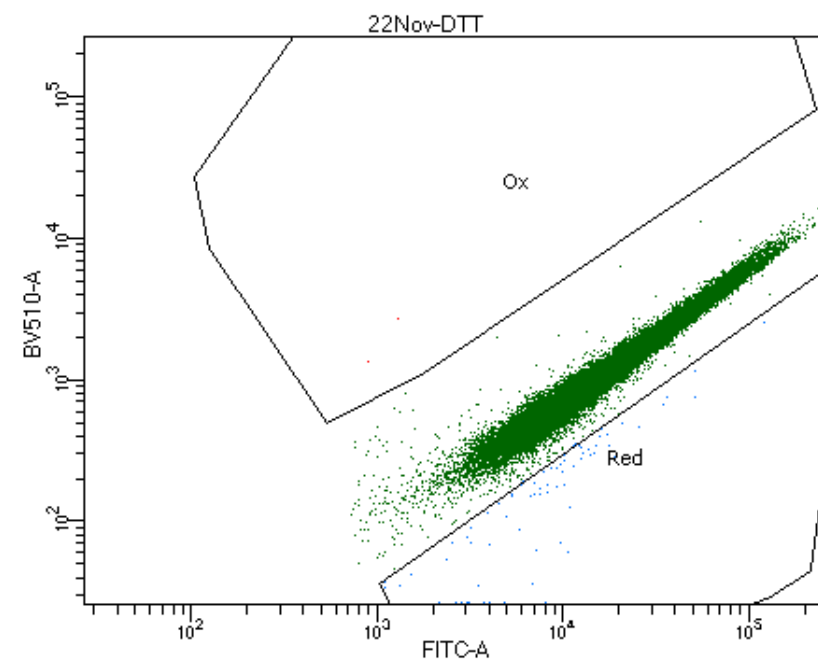

Tube: DTT

| Population | #Events | %Parent | %Total |
|------------|---------|---------|--------|
| All Events | 66,300  | ####    | 100.0  |
| P          | 56,031  | 84.5    | 84.5   |
| S1         | 53,726  | 95.9    | 81.0   |
| S2         | 53,262  | 99.1    | 80.3   |
| S3         | 48,117  | 90.3    | 72.6   |
| S4         | 44,524  | 92.5    | 67.2   |
| GFP+       | 43,820  | 98.4    | 66.1   |
| Ox         | 2       | 0.0     | 0.0    |
| Red        | 76      | 0.2     | 0.1    |

|                  |                                |
|------------------|--------------------------------|
| Experiment Name: | 21Nov2016 Bac sorting          |
| Specimen Name:   | 22Nov                          |
| Tube Name:       | DTT                            |
| Record Date:     | Nov 22, 2016 2:17:07 PM        |
| SOP:             | Administrator                  |
| GUID:            | 196a0967-9d00-4588-a308-c65... |

  

| Population | #Events | %Parent | FITC-A Median | BV510-A Median |
|------------|---------|---------|---------------|----------------|
| S4         | 44,524  | 92.5    | 12,696        | 832            |
| GFP+       | 43,820  | 98.4    | 12,862        | 842            |
| Ox         | 2       | 0.0     | 1,073         | 2,019          |
| Red        | 76      | 0.2     | 8,154         | 176            |



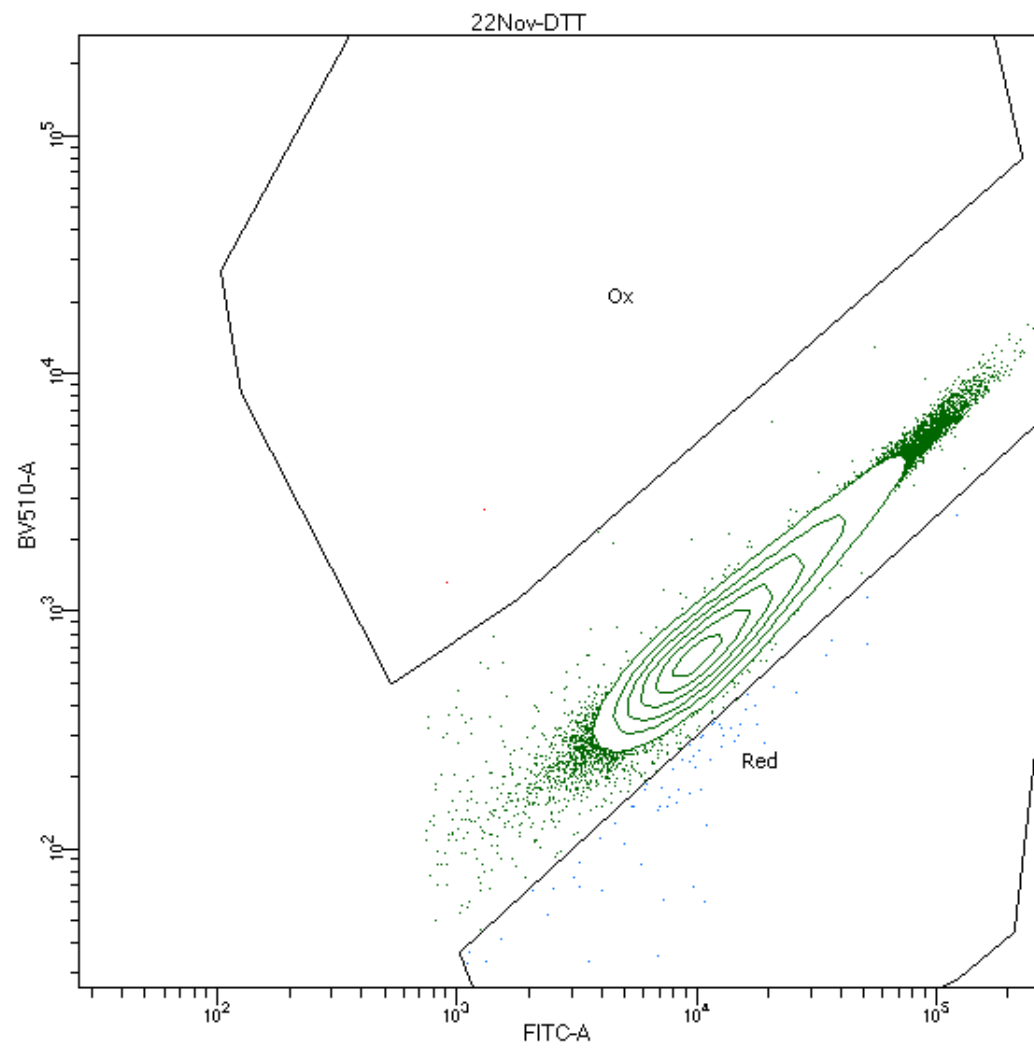

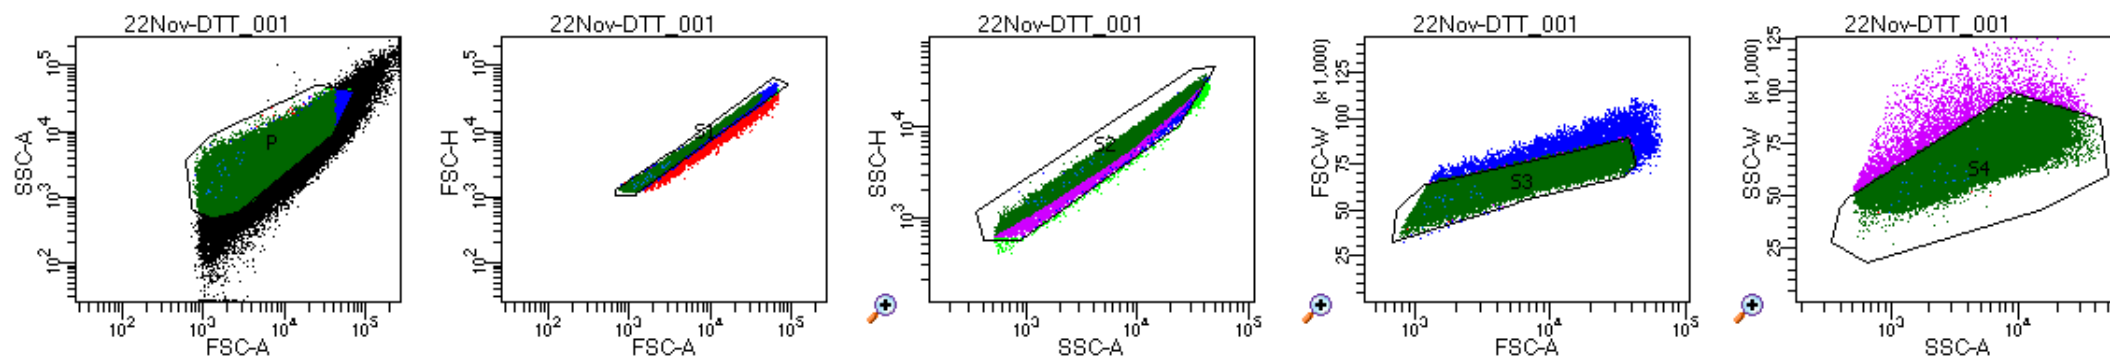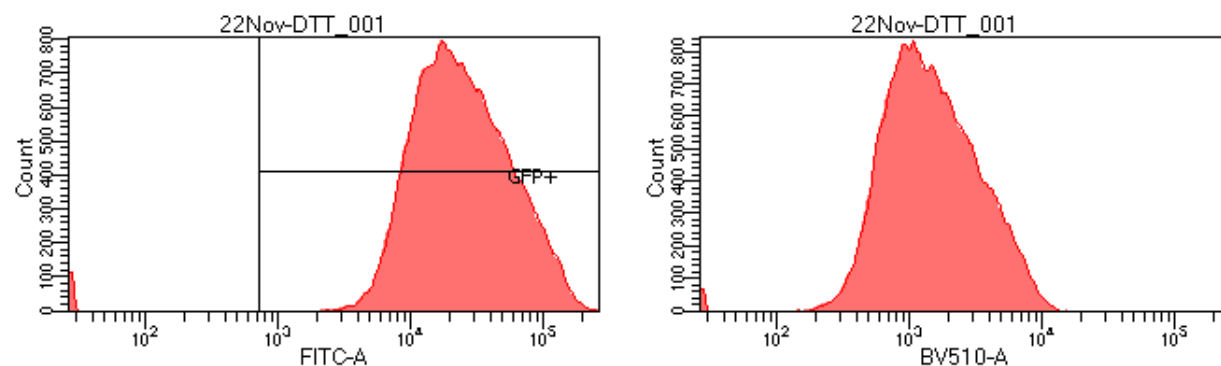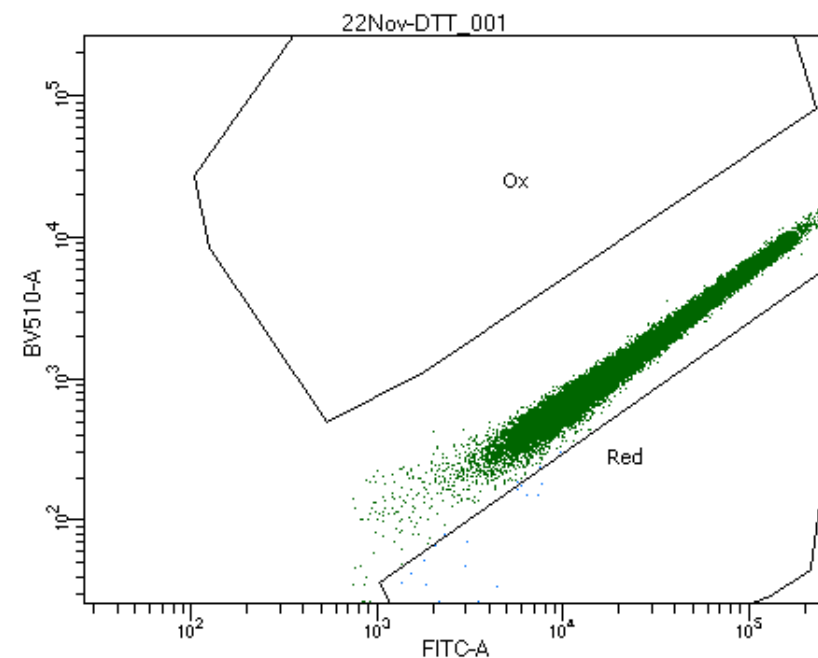

Tube: DTT\_001

| Population | #Events | %Parent | %Total |
|------------|---------|---------|--------|
| All Events | 72,990  | ####    | 100.0  |
| P          | 59,222  | 81.1    | 81.1   |
| S1         | 56,311  | 95.1    | 77.1   |
| S2         | 55,634  | 98.8    | 76.2   |
| S3         | 50,185  | 90.2    | 68.8   |
| S4         | 46,828  | 93.3    | 64.2   |
| GFP+       | 46,479  | 99.3    | 63.7   |
| Ox         | 0       | 0.0     | 0.0    |
| Red        | 22      | 0.0     | 0.0    |

Experiment Name: 21Nov2016 Bac sorting  
 Specimen Name: 22Nov  
 Tube Name: DTT\_001  
 Record Date: Nov 22, 2016 2:17:39 PM  
 SOP: Administrator  
 GUID: f9661cd8-4c75-4ea2-8426-18e...

| Population | #Events | %Parent | FITC-A<br>Median | BV510-A<br>Median |
|------------|---------|---------|------------------|-------------------|
| S4         | 46,828  | 93.3    | 22,288           | 1,320             |
| GFP+       | 46,479  | 99.3    | 22,499           | 1,332             |
| Ox         | 0       | 0.0     | ####             | ####              |
| Red        | 22      | 0.0     | 3,912            | 89                |

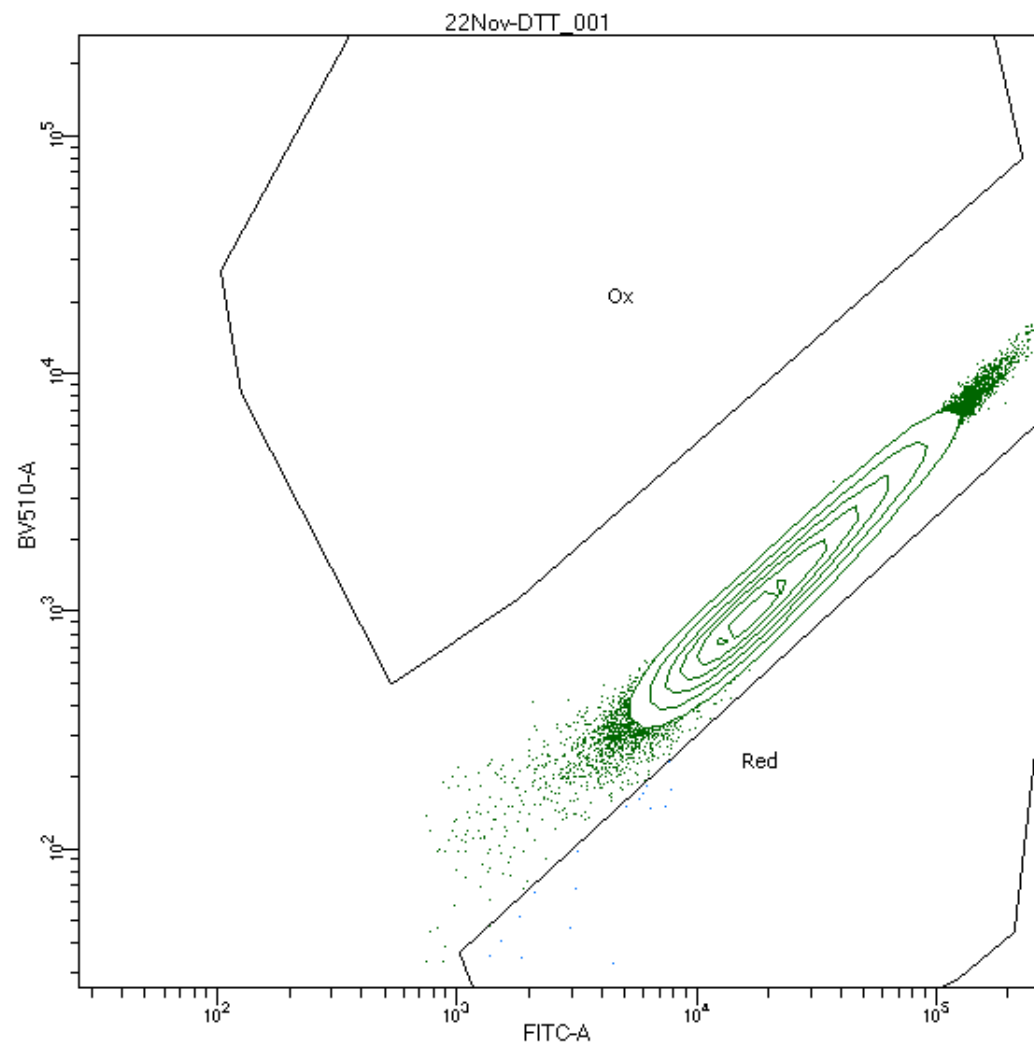

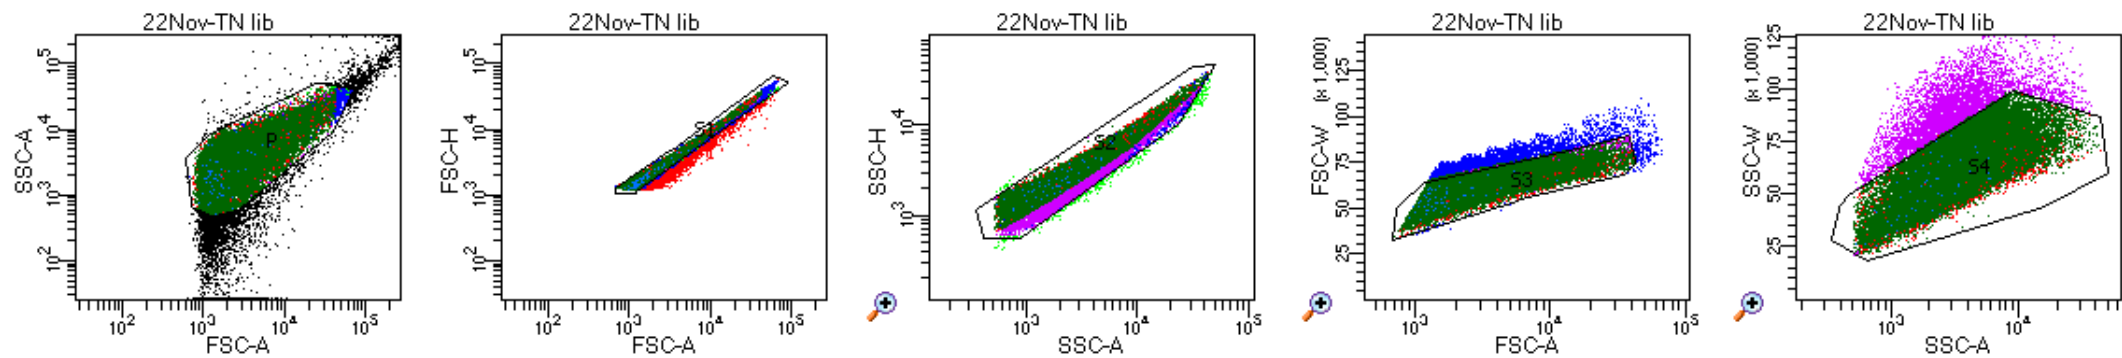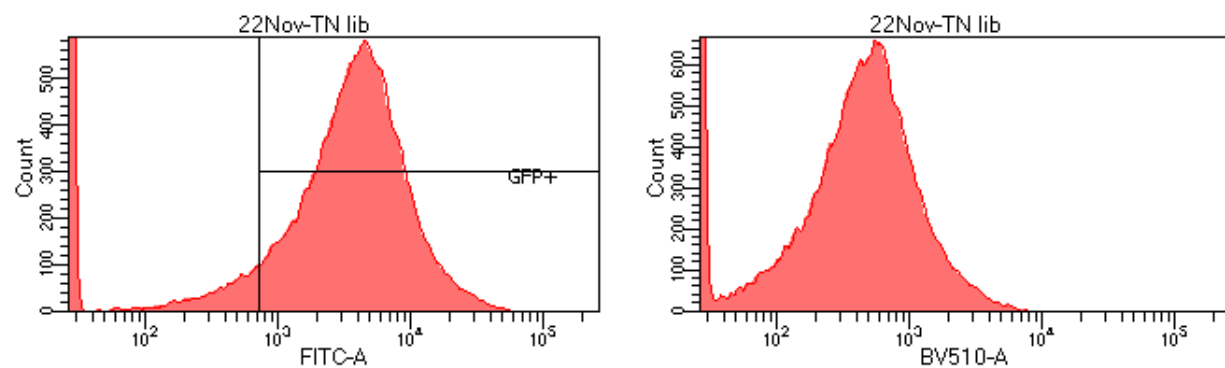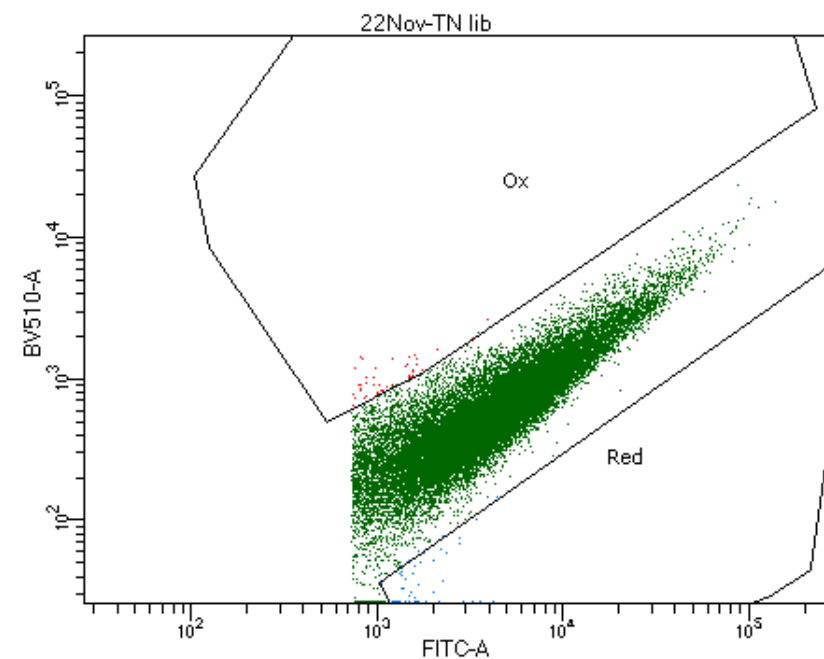

Tube: TN lib

| Population | #Events | %Parent | %Total |
|------------|---------|---------|--------|
| All Events | 58,178  | ####    | 100.0  |
| P          | 53,117  | 91.3    | 91.3   |
| S1         | 49,332  | 92.9    | 84.8   |
| S2         | 48,914  | 99.2    | 84.1   |
| S3         | 43,661  | 89.3    | 75.0   |
| S4         | 38,829  | 88.9    | 66.7   |
| GFP+       | 29,805  | 76.8    | 51.2   |
| Ox         | 45      | 0.2     | 0.1    |
| Red        | 56      | 0.2     | 0.1    |

|                  |                                |
|------------------|--------------------------------|
| Experiment Name: | 21Nov2016 Bac sorting          |
| Specimen Name:   | 22Nov                          |
| Tube Name:       | TN lib                         |
| Record Date:     | Nov 22, 2016 2:18:23 PM        |
| SOP:             | Administrator                  |
| GUID:            | ce5e6ea0-bacc-415d-88e6-341... |

  

| Population | #Events | %Parent | FITC-A Median | BV510-A Median |
|------------|---------|---------|---------------|----------------|
| S4         | 38,829  | 88.9    | 2,994         | 419            |
| GFP+       | 29,805  | 76.8    | 4,055         | 538            |
| Ox         | 45      | 0.2     | 1,021         | 1,006          |
| Red        | 56      | 0.2     | 1,571         | 32             |

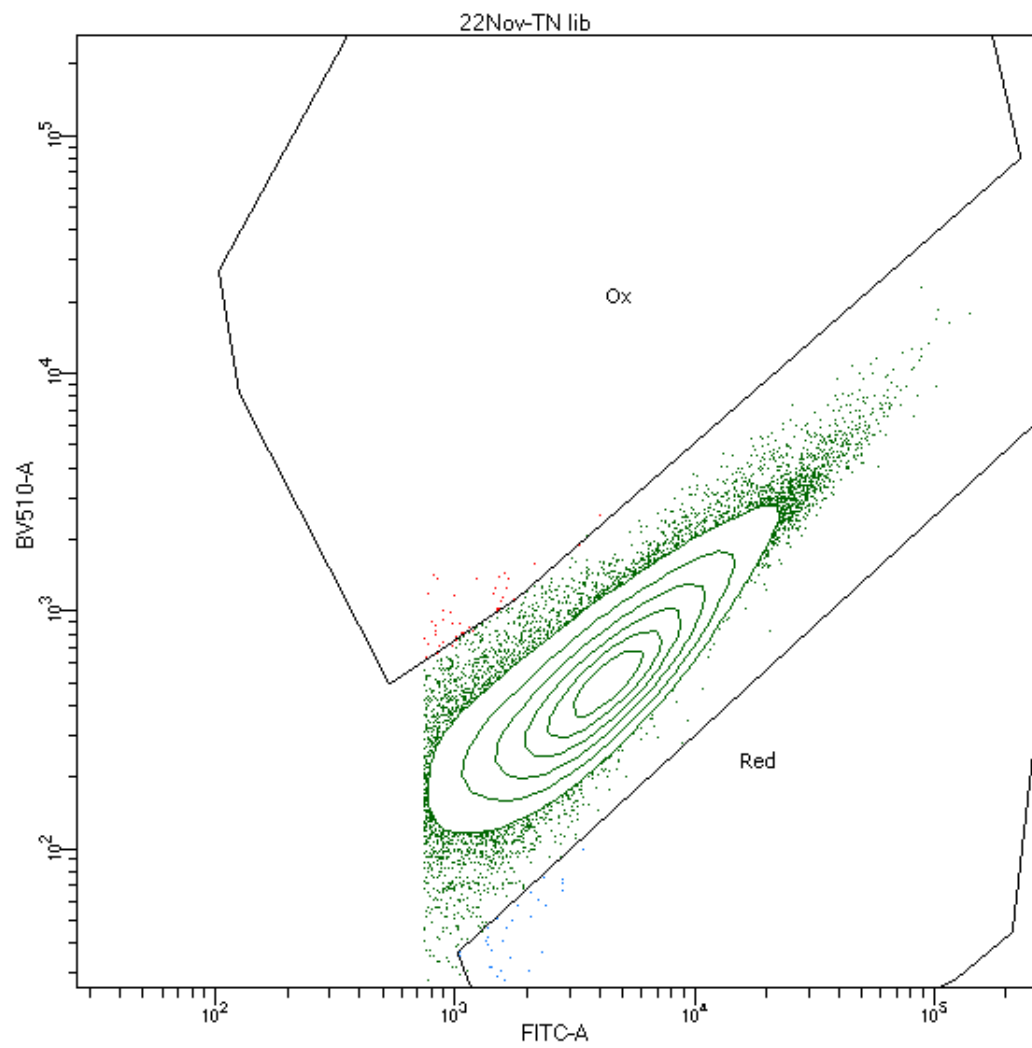

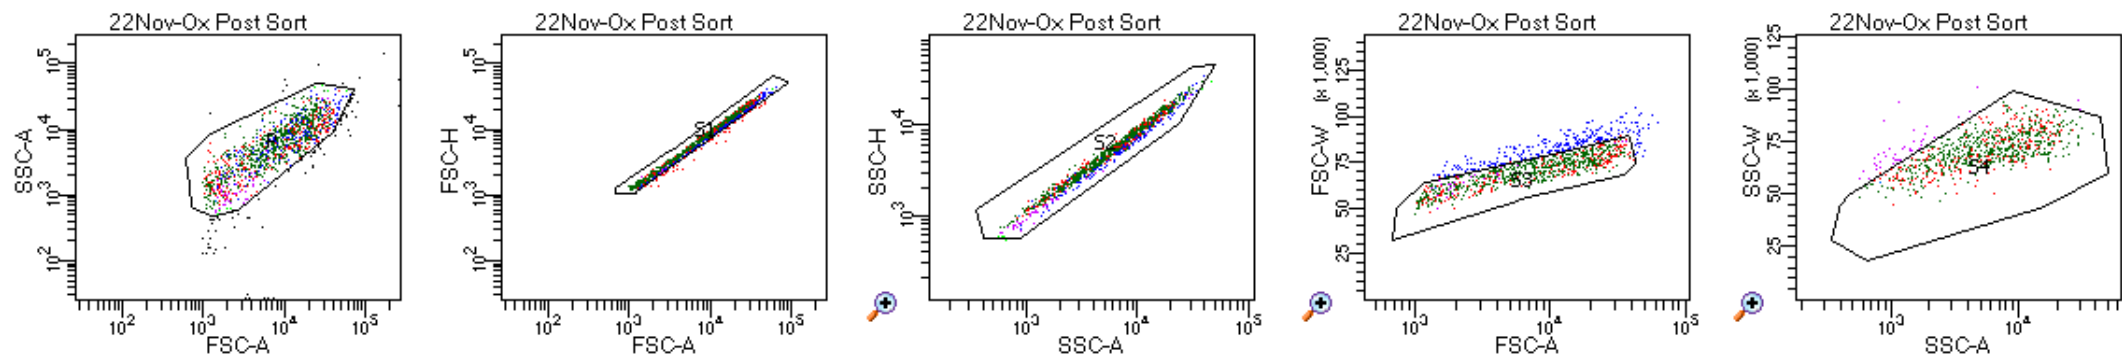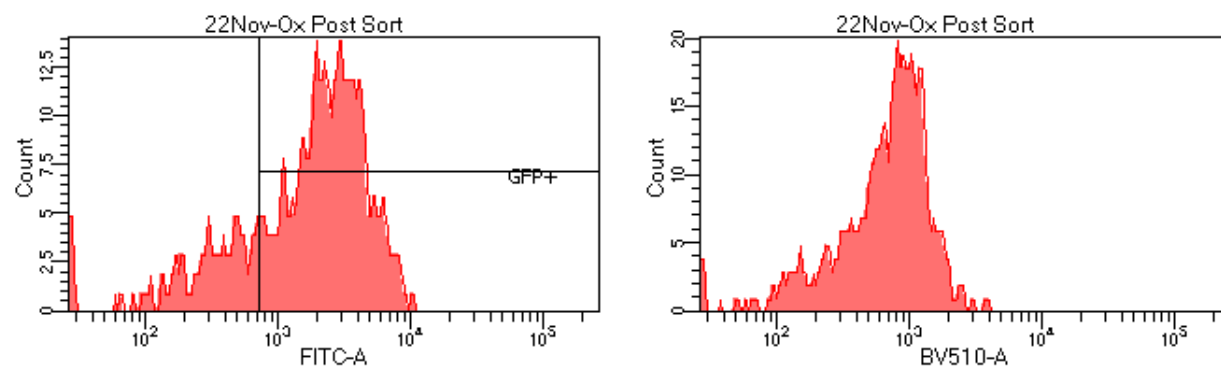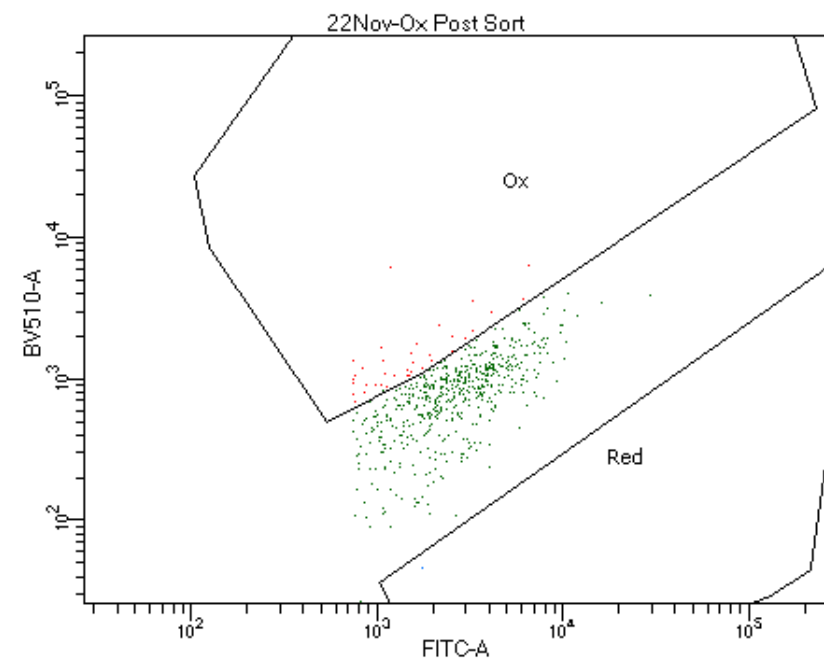

Tube: Ox Post Sort

| Population | #Events | %Parent | %Total |
|------------|---------|---------|--------|
| All Events | 1,246   | ####    | 100.0  |
| P          | 1,156   | 92.8    | 92.8   |
| S1         | 1,101   | 95.2    | 88.4   |
| S2         | 1,093   | 99.3    | 87.7   |
| S3         | 843     | 77.1    | 67.7   |
| S4         | 799     | 94.8    | 64.1   |
| GFP+       | 589     | 73.7    | 47.3   |
| Ox         | 39      | 6.6     | 3.1    |
| Red        | 1       | 0.2     | 0.1    |

|                  |                                 |
|------------------|---------------------------------|
| Experiment Name: | 21Nov2016 Bac sorting           |
| Specimen Name:   | 22Nov                           |
| Tube Name:       | Ox Post Sort                    |
| Record Date:     | Nov 22, 2016 4:43:05 PM         |
| SOP:             | Administrator                   |
| GUID:            | 55af95fe-3ca7-40d4-aa93-41ad... |

  

| Population | #Events | %Parent | FITC-A Median | BV510-A Median |
|------------|---------|---------|---------------|----------------|
| S4         | 799     | 94.8    | 1,866         | 722            |
| GFP+       | 589     | 73.7    | 2,527         | 851            |
| Ox         | 39      | 6.6     | 1,432         | 1,190          |
| Red        | 1       | 0.2     | 1,739         | 46             |

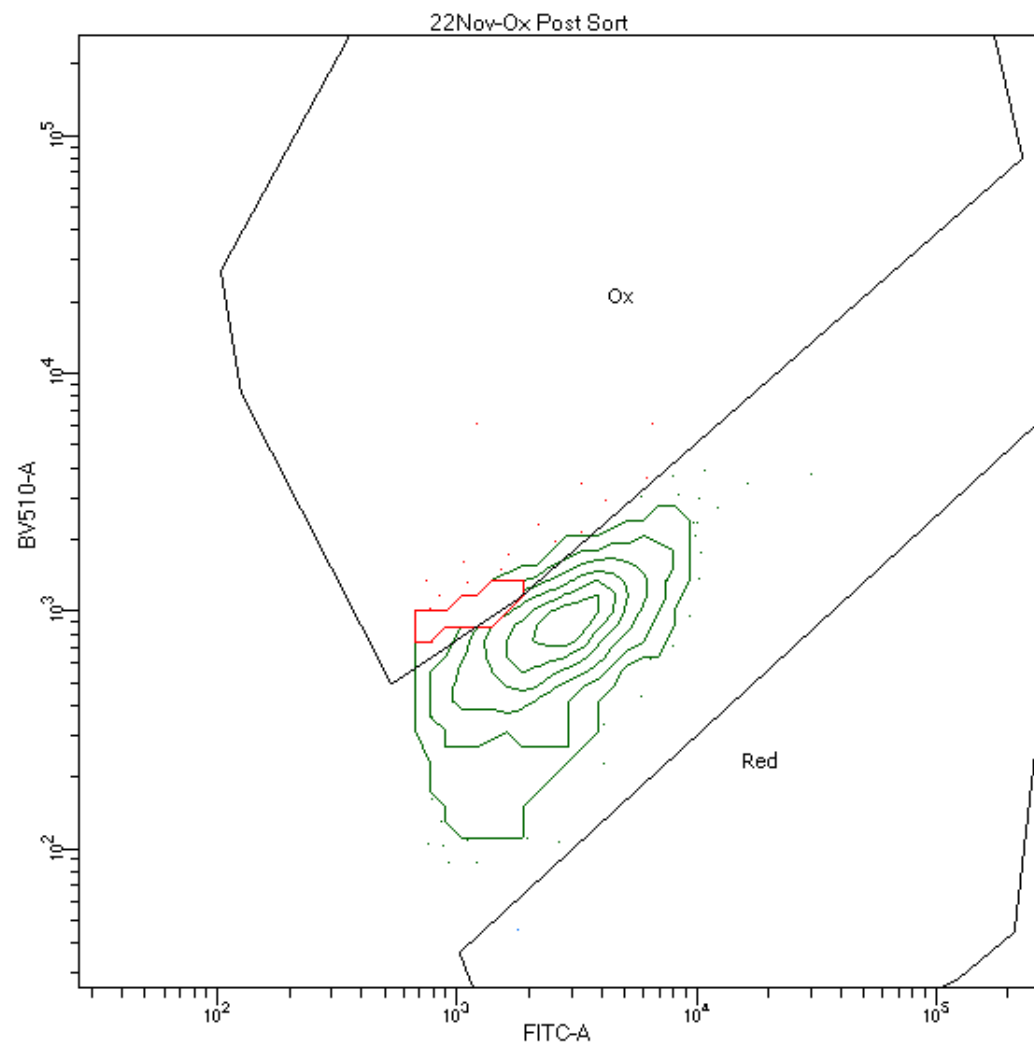

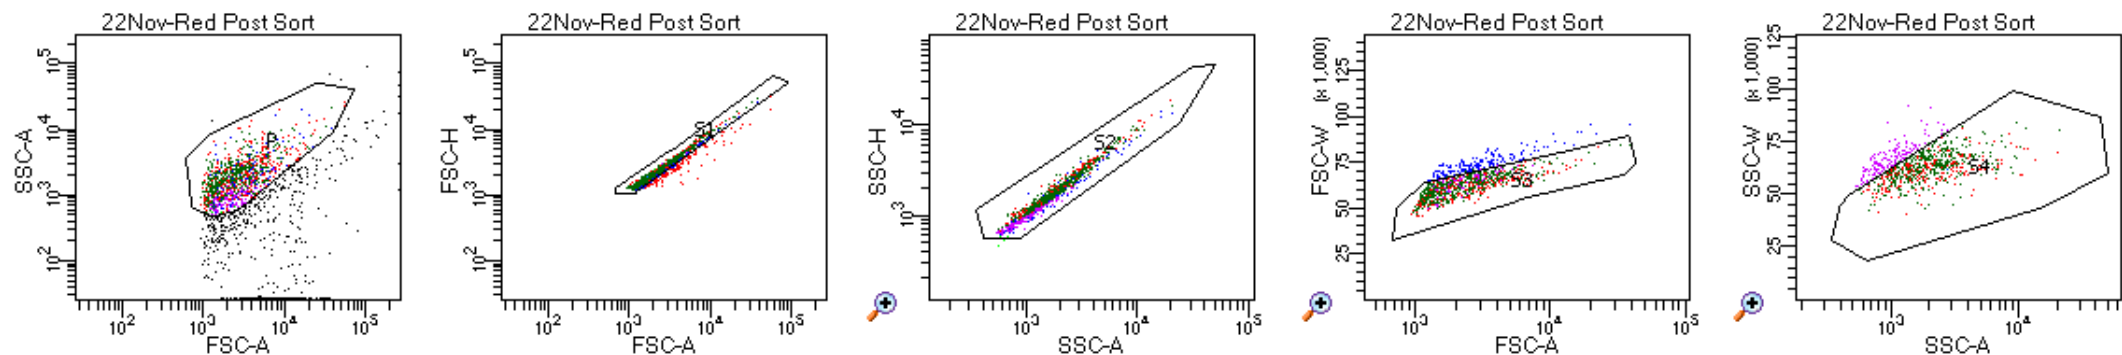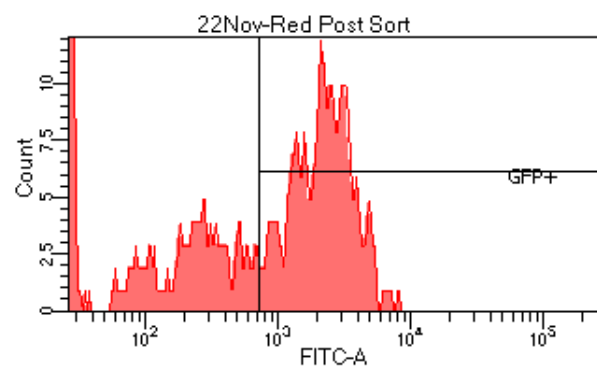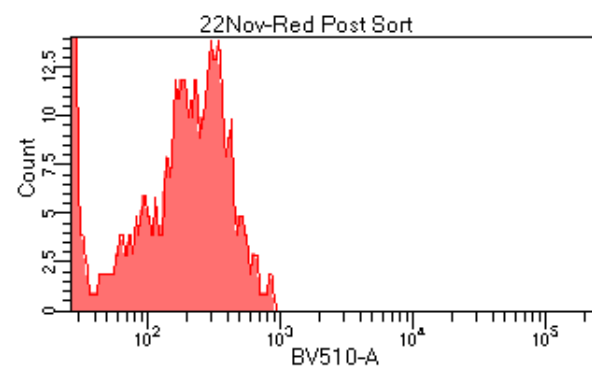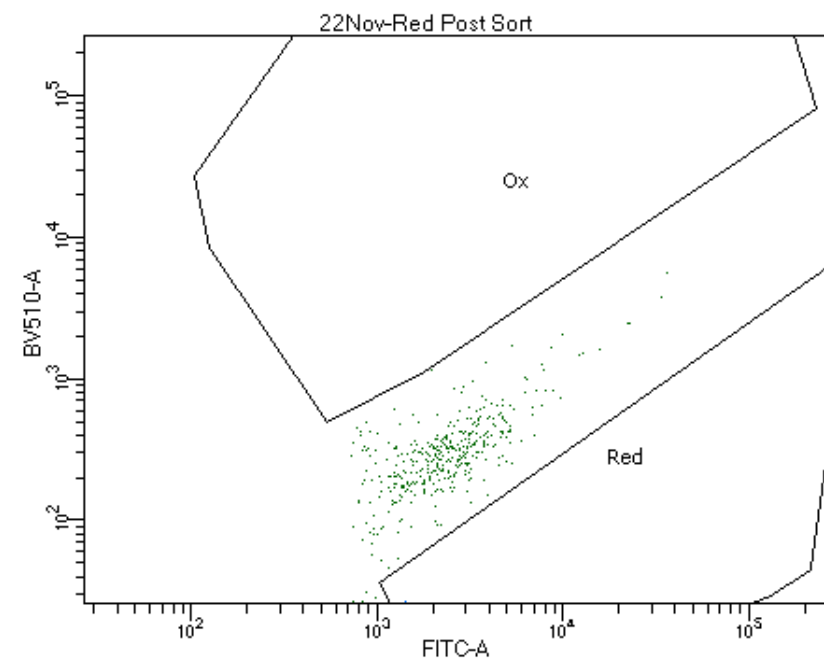

Tube: Red Post Sort

| Population | #Events | %Parent | %Total |
|------------|---------|---------|--------|
| All Events | 1,803   | ####    | 100.0  |
| P          | 1,158   | 64.2    | 64.2   |
| S1         | 1,022   | 88.3    | 56.7   |
| S2         | 1,016   | 99.4    | 56.4   |
| S3         | 848     | 83.5    | 47.0   |
| S4         | 698     | 82.3    | 38.7   |
| GFP+       | 395     | 56.6    | 21.9   |
| Ox         | 0       | 0.0     | 0.0    |
| Red        | 1       | 0.3     | 0.1    |

|                  |                                |
|------------------|--------------------------------|
| Experiment Name: | 21Nov2016 Bac sorting          |
| Specimen Name:   | 22Nov                          |
| Tube Name:       | Red Post Sort                  |
| Record Date:     | Nov 22, 2016 4:43:47 PM        |
| SOP:             | Administrator                  |
| GUID:            | 8158858b-cd1a-47b0-aafc-6e3... |

  

| Population | #Events | %Parent | FITC-A Median | BV510-A Median |
|------------|---------|---------|---------------|----------------|
| S4         | 698     | 82.3    | 1,127         | 187            |
| GFP+       | 395     | 56.6    | 2,213         | 289            |
| Ox         | 0       | 0.0     | ####          | ####           |
| Red        | 1       | 0.3     | 1,413         | -5             |



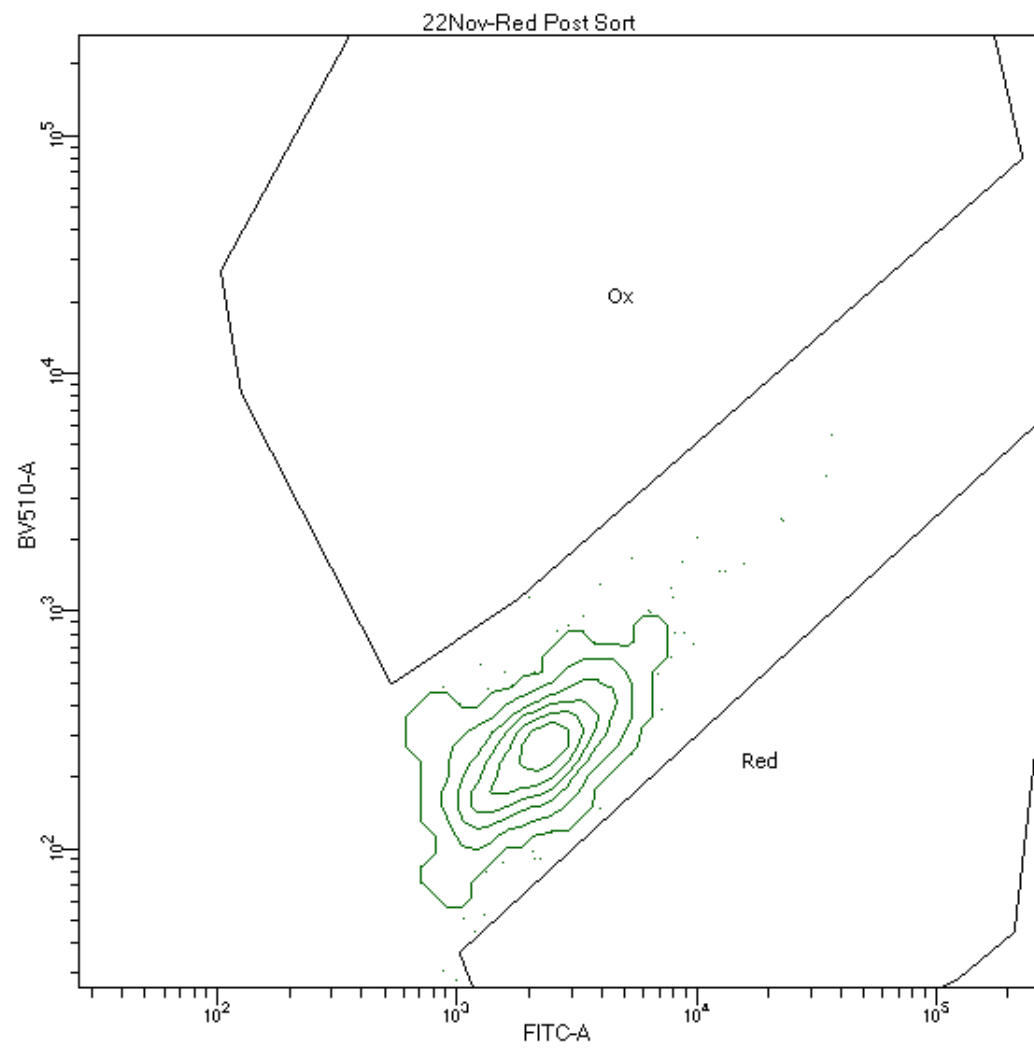

Supplement: supp [file elife-80218-supp-v1.zip]
