# Supplementary material for: Biosensor-integrated transposon mutagenesis reveals rv0158 as a coordinator of redox homeostasis in Mycobacterium tuberculosis
Source: eLife journal article supplement (doi:10.7554/elife.80218), 2023-08-29

# Batch Analysis Report

Run Date: 12/6/16 4:26 PM

Experiment: 05EDec2016 Bac sorting

User ID: Administrator

Statistics Output: N/A

Worksheet PDF Output: C:\Users\Admin\Desktop\06EDec2016 Bac sorting-Batch\_Analysis\_0612  
2016162608.pdf

**06Dec**

| Tube          | Status | Run Time        |
|---------------|--------|-----------------|
| US            | OK     | 12/6/16 4:26 PM |
| RV Mrx1       | OK     | 12/6/16 4:26 PM |
| RV Mrx1_001   | OK     | 12/6/16 4:26 PM |
| RV Mrx1_002   | OK     | 12/6/16 4:26 PM |
| TN lib        | OK     | 12/6/16 4:26 PM |
| Ox Post Sort  | OK     | 12/6/16 4:26 PM |
| Red Post Sort | OK     | 12/6/16 4:26 PM |

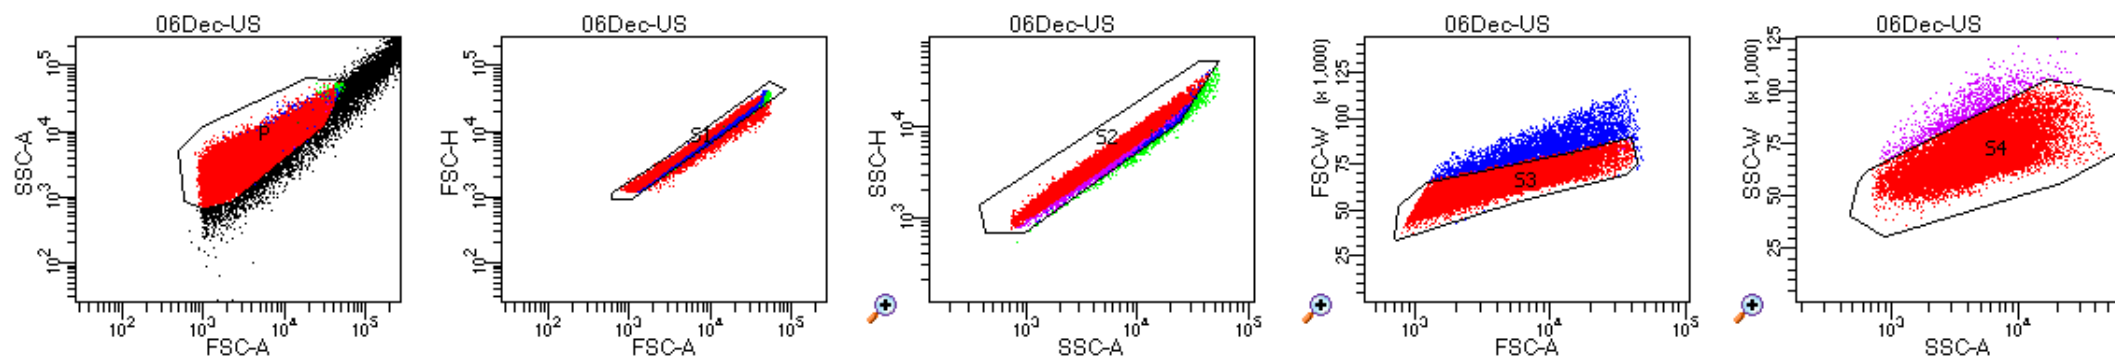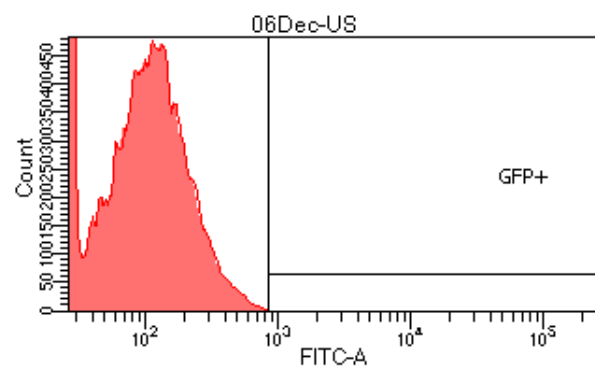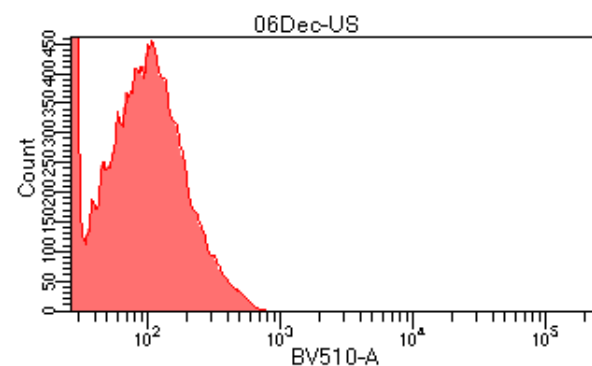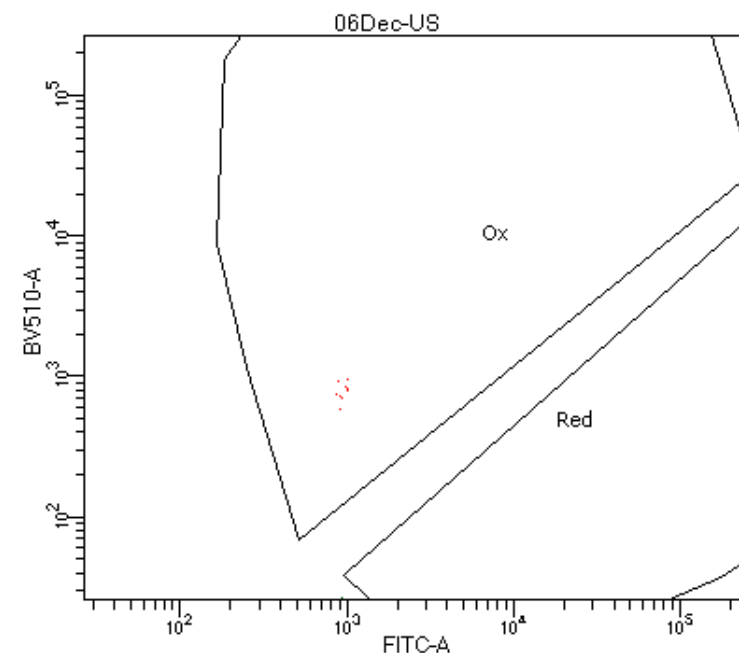

Tube: US

| Population | #Events | %Parent | %Total |
|------------|---------|---------|--------|
| All Events | 35,192  | ####    | 100.0  |
| P          | 30,000  | 85.2    | 85.2   |
| S1         | 28,627  | 95.4    | 81.3   |
| S2         | 27,978  | 97.7    | 79.5   |
| S3         | 23,944  | 85.6    | 68.0   |
| S4         | 23,023  | 96.2    | 65.4   |
| GFP+       | 10      | 0.0     | 0.0    |
| Ox         | 9       | 90.0    | 0.0    |
| Red        | 0       | 0.0     | 0.0    |

Experiment Name: 05EDec2016 Bac sorting  
 Specimen Name: 06Dec  
 Tube Name: US  
 Record Date: Dec 6, 2016 2:12:29 PM  
 SOP: Administrator  
 GUID: bab90d99-ffe7-4c0d-9fda-2221...

| Population | #Events | %Parent | FITC-A Median | BV510-A Median |
|------------|---------|---------|---------------|----------------|
| S4         | 23,023  | 96.2    | 97            | 83             |
| GFP+       | 10      | 0.0     | 917           | 759            |
| Ox         | 9       | 90.0    | 924           | 784            |
| Red        | 0       | 0.0     | ####          | ####           |

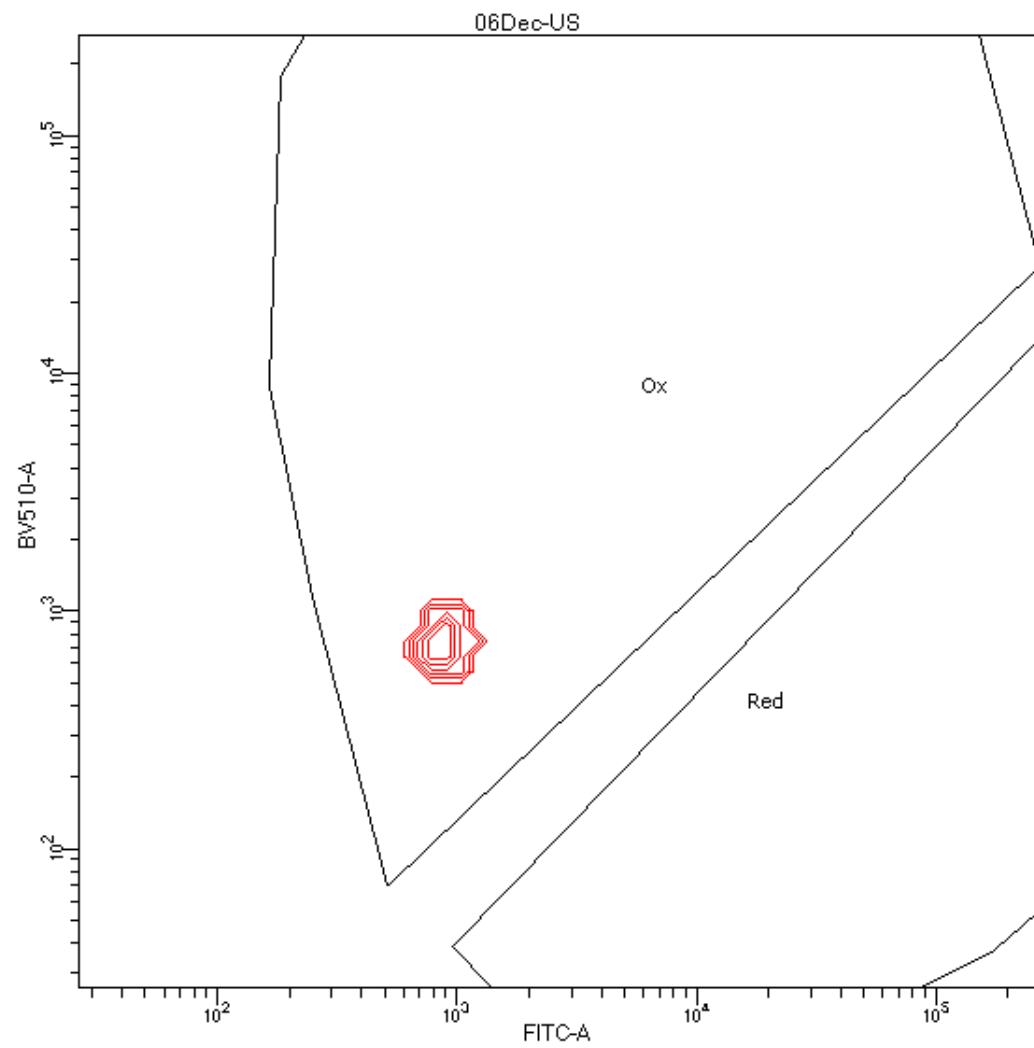

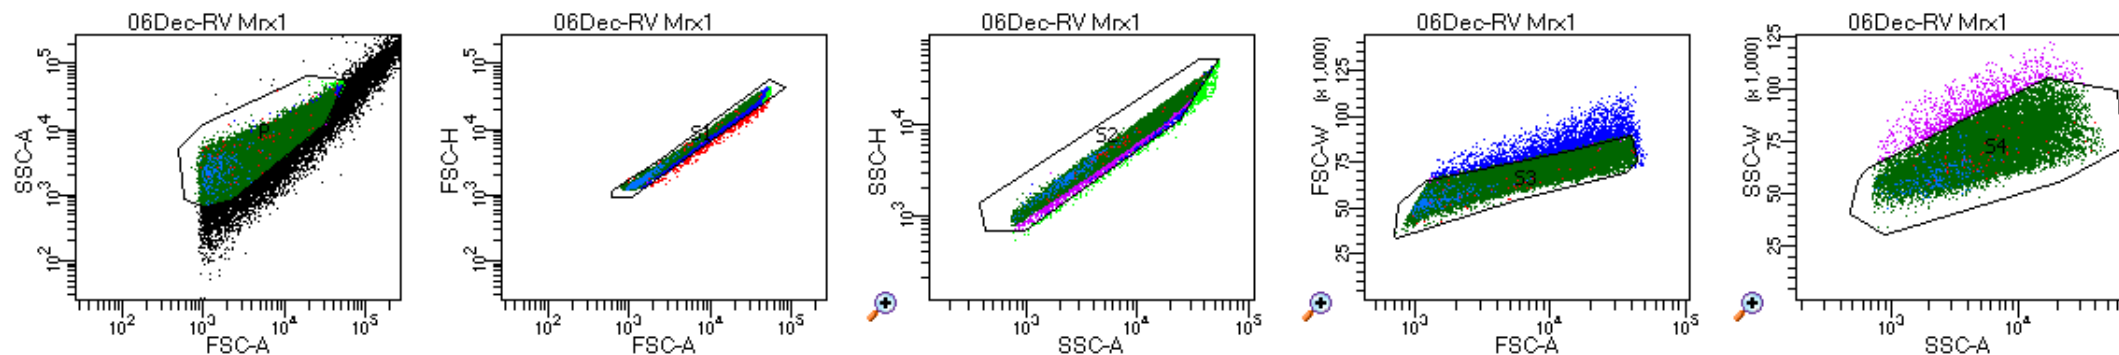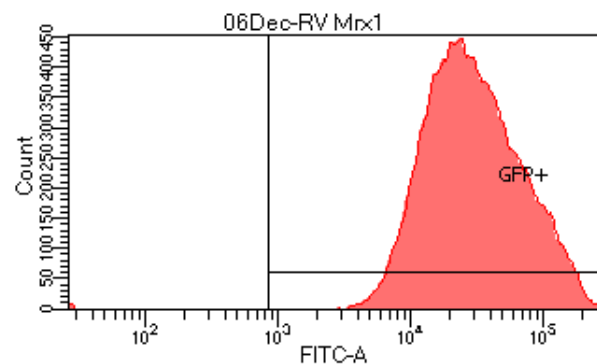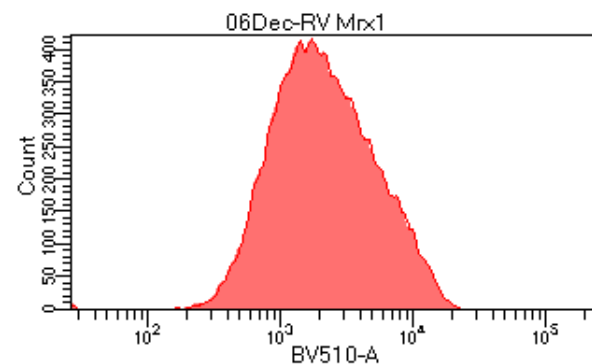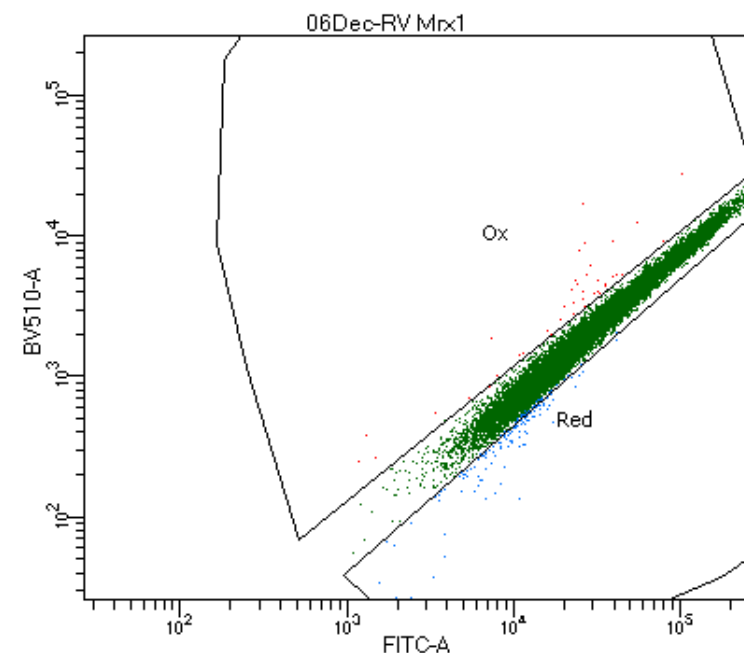

Tube: RV Mrx1

| Population | #Events | %Parent | %Total |
|------------|---------|---------|--------|
| All Events | 38,323  | ####    | 100.0  |
| P          | 30,000  | 78.3    | 78.3   |
| S1         | 29,618  | 98.7    | 77.3   |
| S2         | 29,115  | 98.3    | 76.0   |
| S3         | 26,784  | 92.0    | 69.9   |
| S4         | 25,837  | 96.5    | 67.4   |
| GFP+       | 25,793  | 99.8    | 67.3   |
| Ox         | 49      | 0.2     | 0.1    |
| Red        | 175     | 0.7     | 0.5    |

|                  |                                  |
|------------------|----------------------------------|
| Experiment Name: | 05EDec2016 Bac sorting           |
| Specimen Name:   | 06Dec                            |
| Tube Name:       | RV Mrx1                          |
| Record Date:     | Dec 6, 2016 2:13:21 PM           |
| SOP:             | Administrator                    |
| GUID:            | e18fffd3-0e6f-4822-8d3e-8089d... |

  

| Population | #Events | %Parent | FITC-A Median | BV510-A Median |
|------------|---------|---------|---------------|----------------|
| S4         | 25,837  | 96.5    | 27,036        | 1,935          |
| GFP+       | 25,793  | 99.8    | 27,077        | 1,938          |
| Ox         | 49      | 0.2     | 24,624        | 3,952          |
| Red        | 175     | 0.7     | 10,702        | 432            |

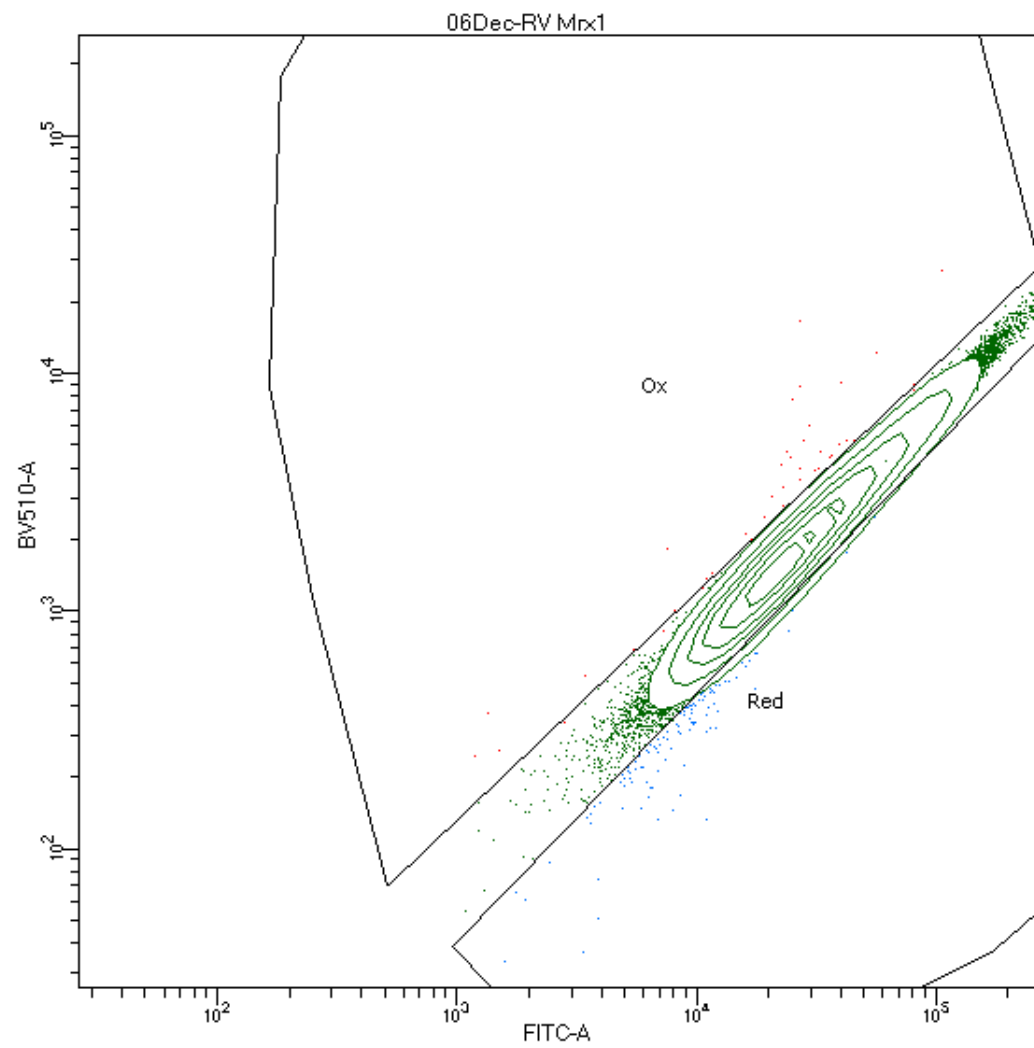

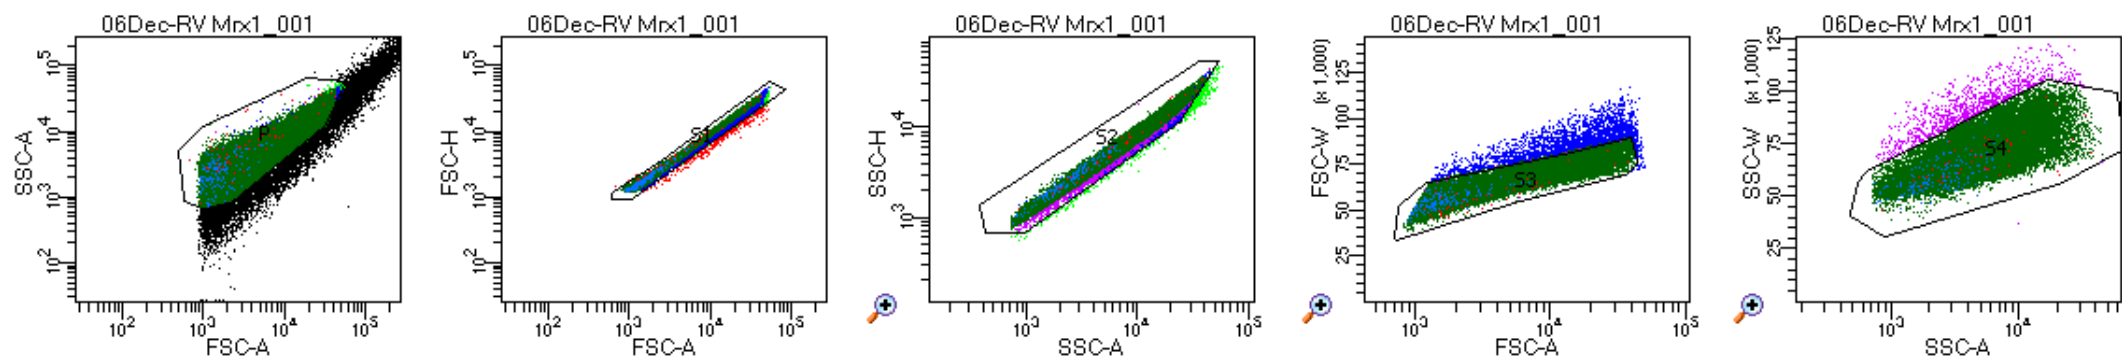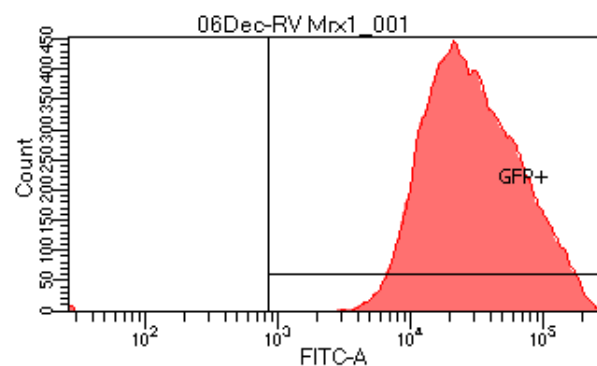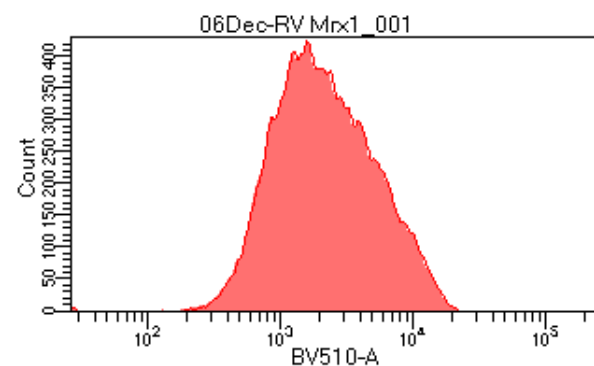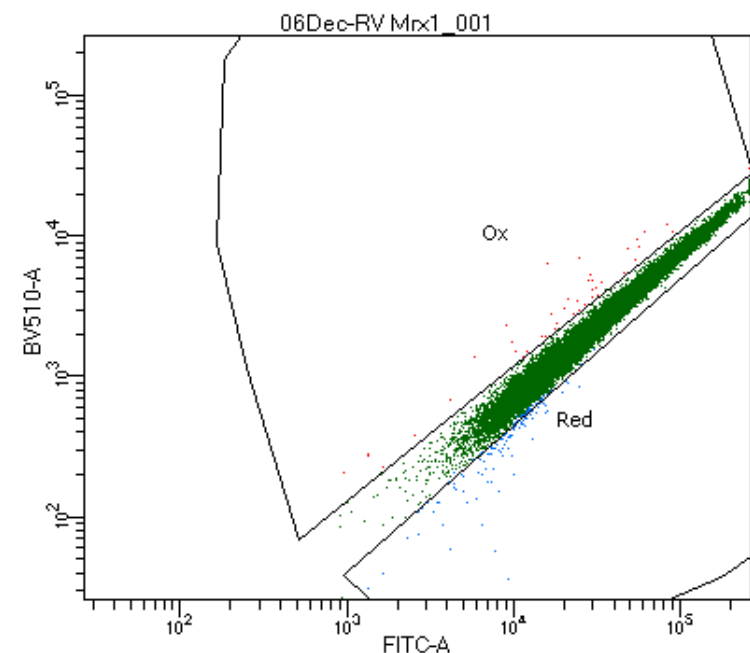

Tube: RV Mrx1\_001

| Population | #Events | %Parent | %Total |
|------------|---------|---------|--------|
| All Events | 38,403  | ####    | 100.0  |
| P          | 30,000  | 78.1    | 78.1   |
| S1         | 29,593  | 98.6    | 77.1   |
| S2         | 29,008  | 98.0    | 75.5   |
| S3         | 26,517  | 91.4    | 69.0   |
| S4         | 25,567  | 96.4    | 66.6   |
| GFP+       | 25,526  | 99.8    | 66.5   |
| Ox         | 47      | 0.2     | 0.1    |
| Red        | 154     | 0.6     | 0.4    |

|                  |                                 |
|------------------|---------------------------------|
| Experiment Name: | 05EDec2016 Bac sorting          |
| Specimen Name:   | 06Dec                           |
| Tube Name:       | RV Mrx1_001                     |
| Record Date:     | Dec 6, 2016 2:13:56 PM          |
| SOP:             | Administrator                   |
| GUID:            | 36805fdd-16e1-42e4-8f22-3aac... |

  

| Population | #Events | %Parent | FITC-A Median | BV510-A Median |
|------------|---------|---------|---------------|----------------|
| S4         | 25,567  | 96.4    | 26,760        | 1,945          |
| GFP+       | 25,526  | 99.8    | 26,840        | 1,949          |
| Ox         | 47      | 0.2     | 24,579        | 3,516          |
| Red        | 154     | 0.6     | 9,735         | 388            |

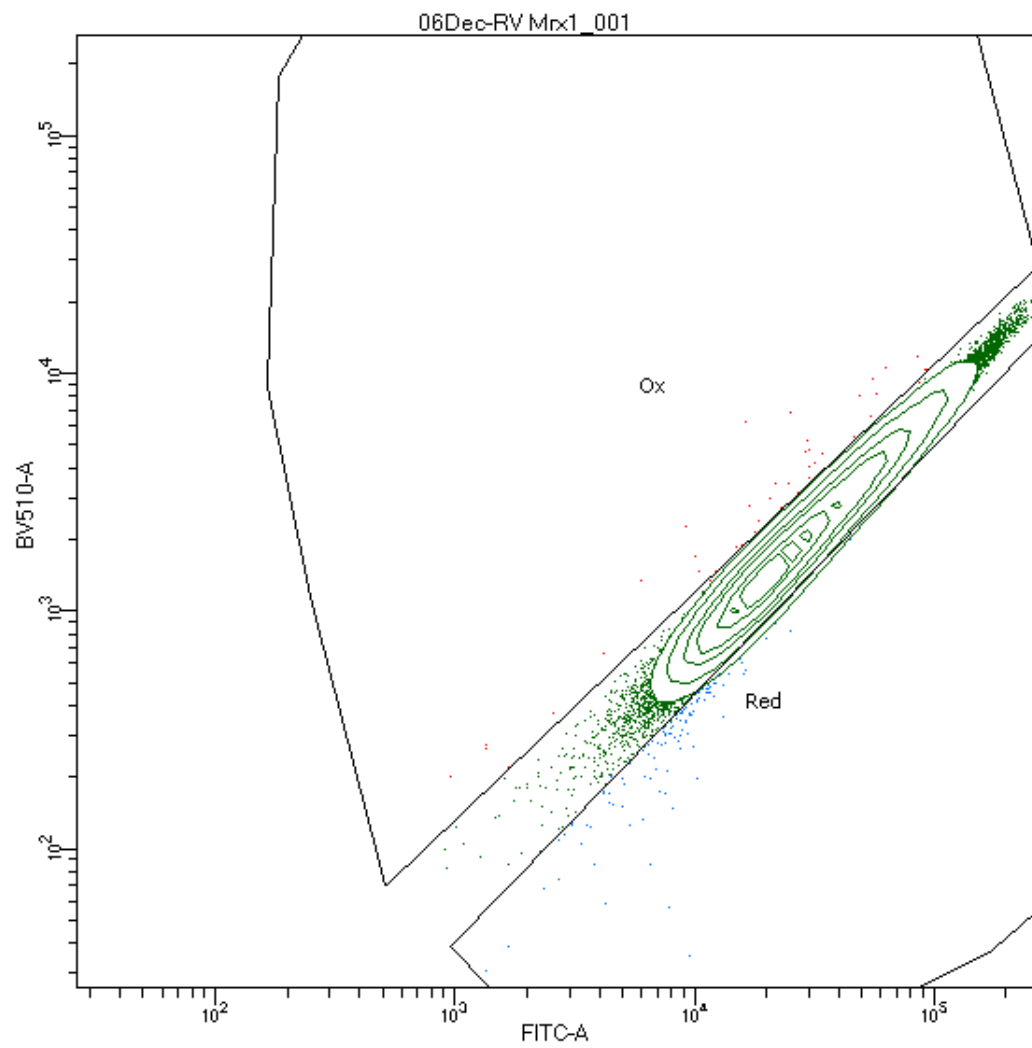

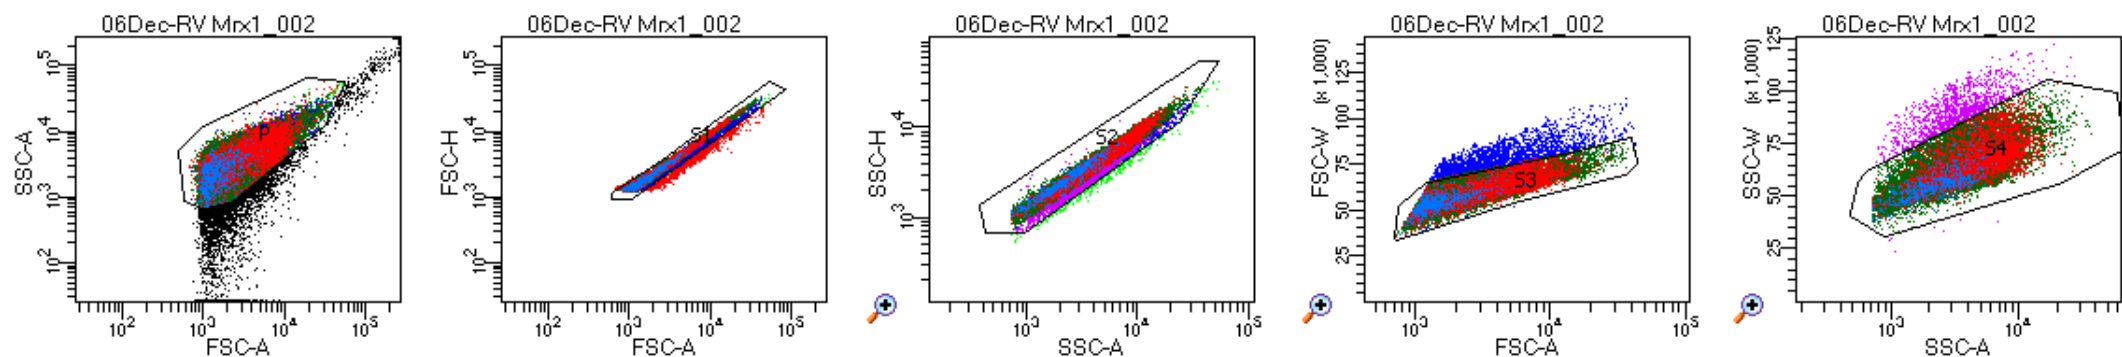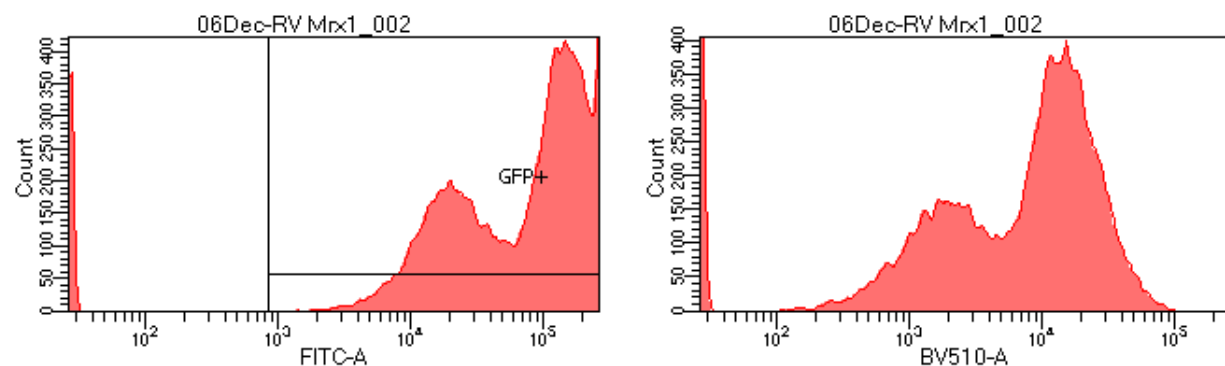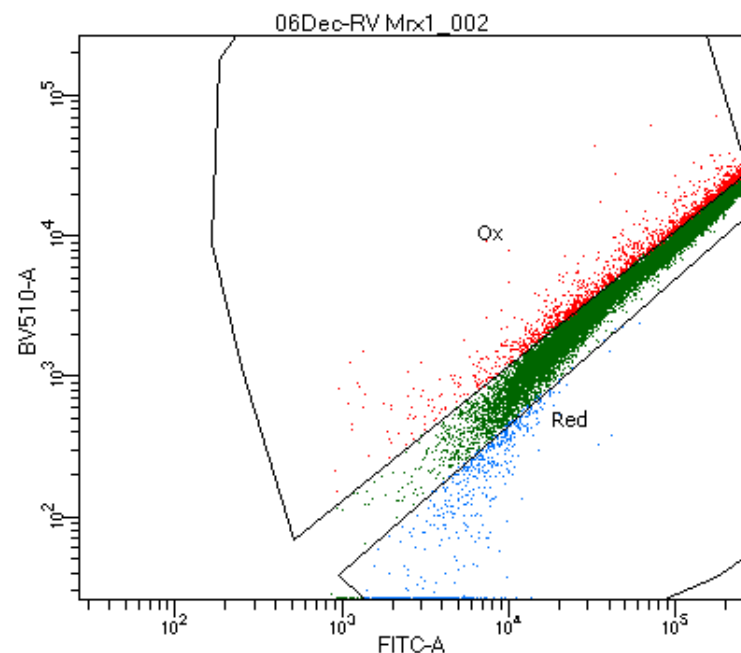

Tube: RV Mrx1\_002

| Population | #Events | %Parent | %Total |
|------------|---------|---------|--------|
| All Events | 33,015  | ####    | 100.0  |
| P          | 30,000  | 90.9    | 90.9   |
| S1         | 28,921  | 96.4    | 87.6   |
| S2         | 28,507  | 98.6    | 86.3   |
| S3         | 26,447  | 92.8    | 80.1   |
| S4         | 25,230  | 95.4    | 76.4   |
| GFP+       | 24,255  | 96.1    | 73.5   |
| Ox         | 3,288   | 13.6    | 10.0   |
| Red        | 579     | 2.4     | 1.8    |

|                  |                                 |
|------------------|---------------------------------|
| Experiment Name: | 05EDec2016 Bac sorting          |
| Specimen Name:   | 06Dec                           |
| Tube Name:       | RV Mrx1_002                     |
| Record Date:     | Dec 6, 2016 2:14:28 PM          |
| SOP:             | Administrator                   |
| GUID:            | 2aac91fc-8fc5-420a-a2eb-e499... |

  

| Population | #Events | %Parent | FITC-A Median | BV510-A Median |
|------------|---------|---------|---------------|----------------|
| S4         | 25,230  | 95.4    | 98,597        | 9,038          |
| GFP+       | 24,255  | 96.1    | 104,496       | 9,599          |
| Ox         | 3,288   | 13.6    | 245,682       | 26,778         |
| Red        | 579     | 2.4     | 6,204         | 178            |



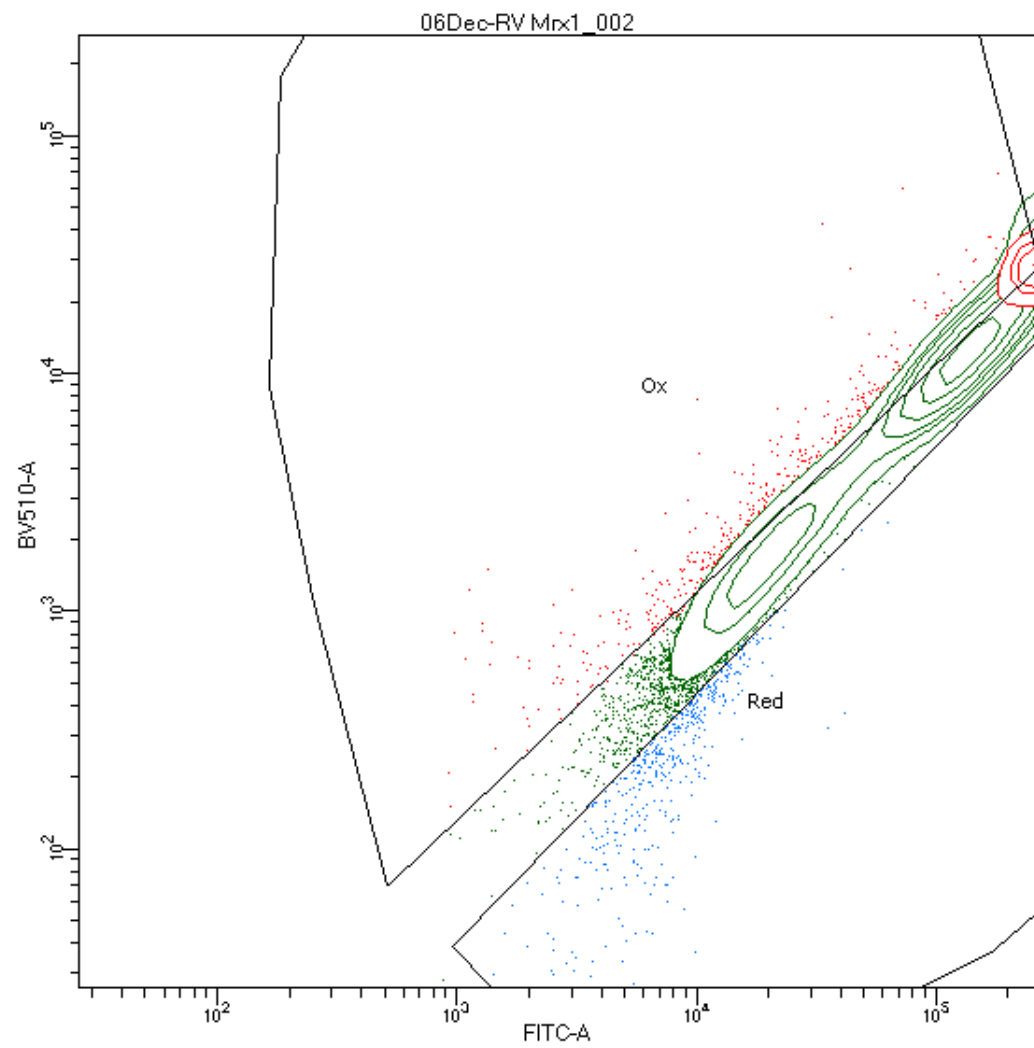

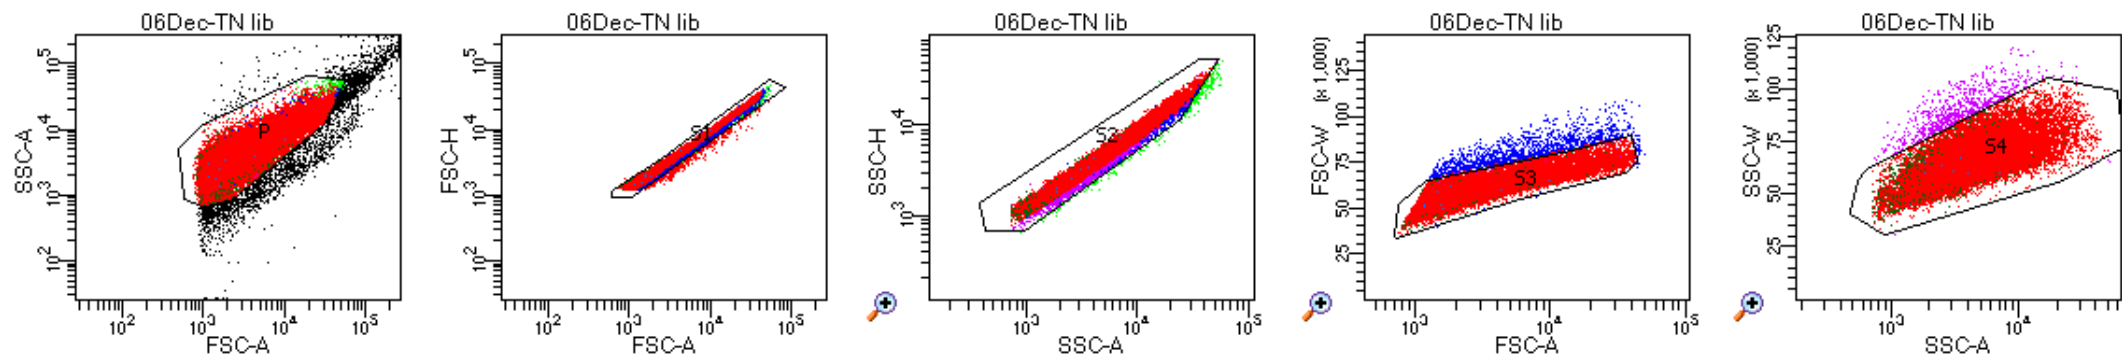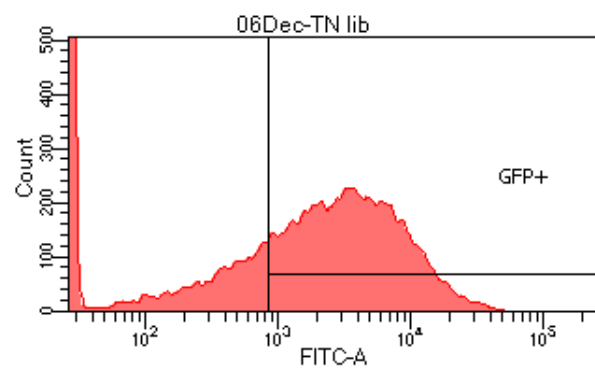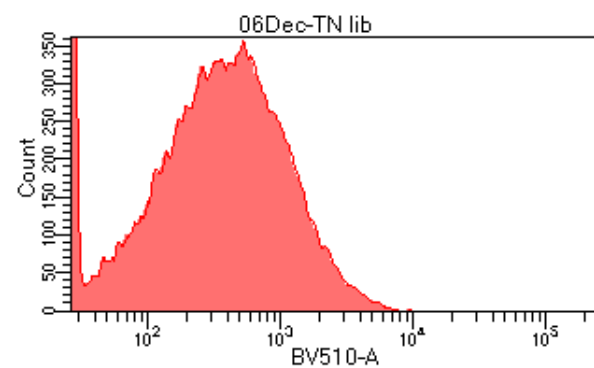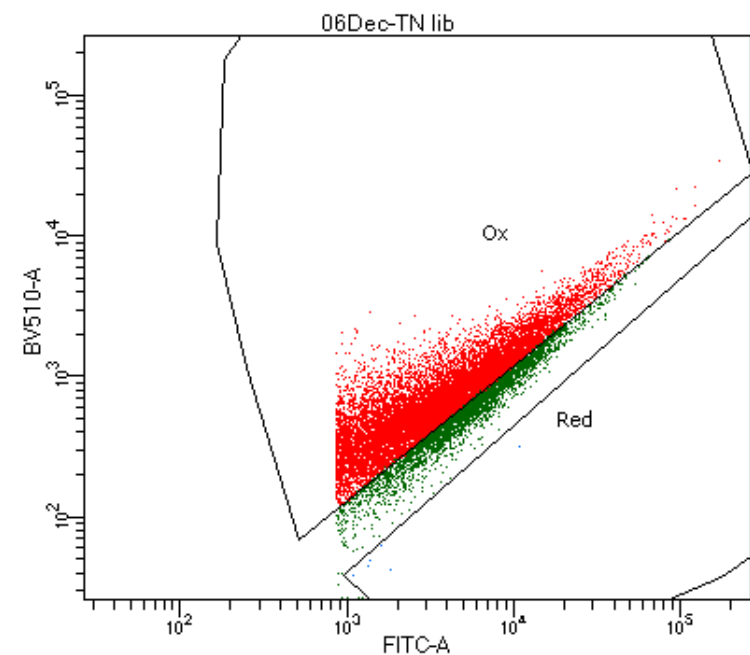

Tube: TN lib

| Population | #Events | %Parent | %Total |
|------------|---------|---------|--------|
| All Events | 32,644  | ####    | 100.0  |
| P          | 30,000  | 91.9    | 91.9   |
| S1         | 29,618  | 98.7    | 90.7   |
| S2         | 29,317  | 99.0    | 89.8   |
| S3         | 27,964  | 95.4    | 85.7   |
| S4         | 27,239  | 97.4    | 83.4   |
| GFP+       | 15,353  | 56.4    | 47.0   |
| Ox         | 11,664  | 76.0    | 35.7   |
| Red        | 8       | 0.1     | 0.0    |

|                  |                                 |
|------------------|---------------------------------|
| Experiment Name: | 05EDec2016 Bac sorting          |
| Specimen Name:   | 06Dec                           |
| Tube Name:       | TN lib                          |
| Record Date:     | Dec 6, 2016 2:15:39 PM          |
| SOP:             | Administrator                   |
| GUID:            | bfe7caeb-0f50-4da1-b0d5-c71e... |

  

| Population | #Events | %Parent | FITC-A Median | BV510-A Median |
|------------|---------|---------|---------------|----------------|
| S4         | 27,239  | 97.4    | 1,262         | 344            |
| GFP+       | 15,353  | 56.4    | 3,656         | 632            |
| Ox         | 11,664  | 76.0    | 3,129         | 652            |
| Red        | 8       | 0.1     | 1,693         | 55             |

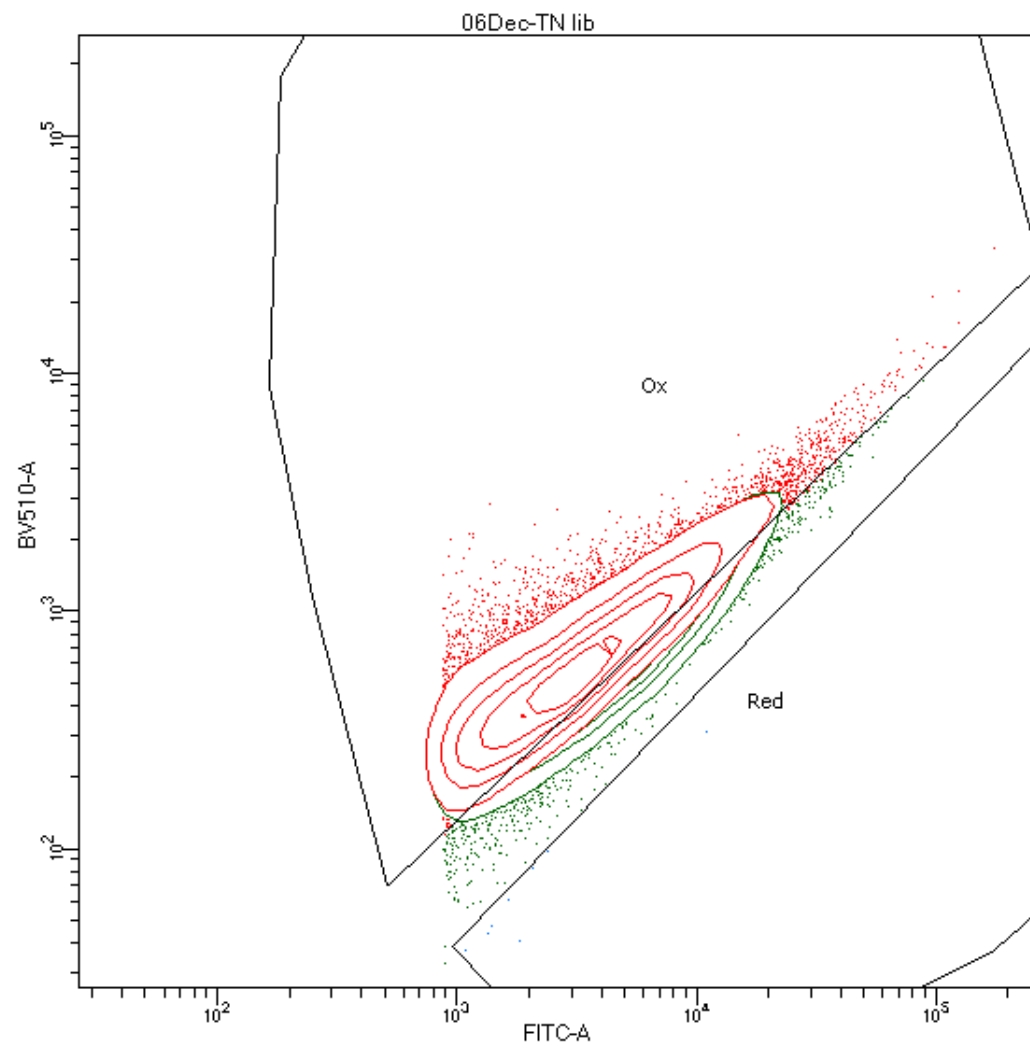

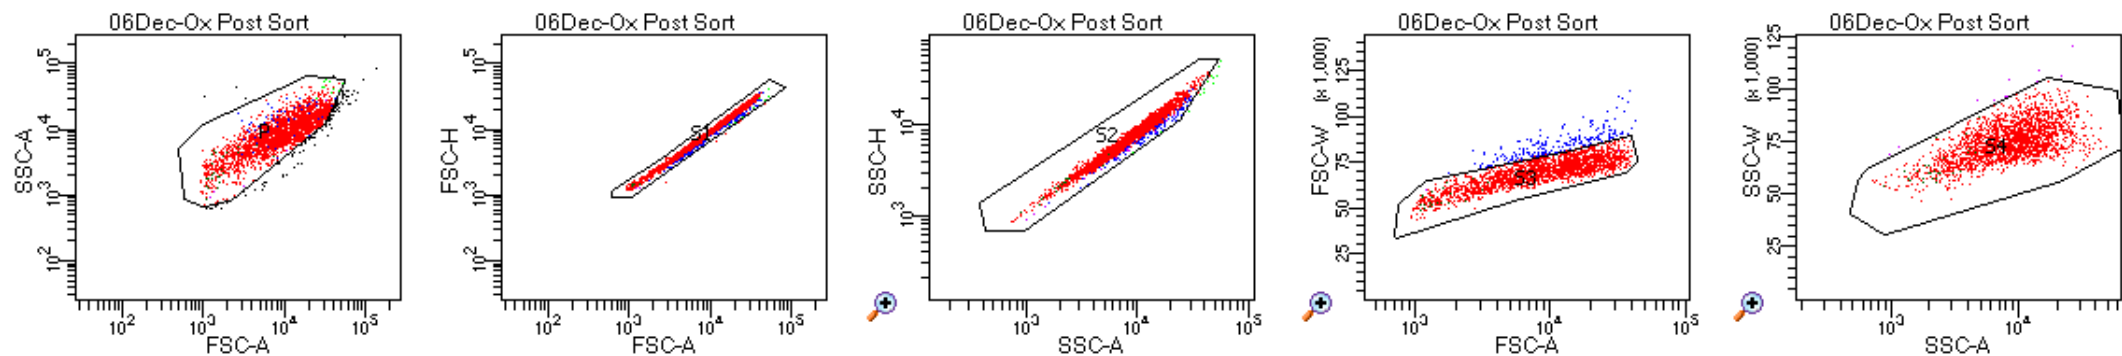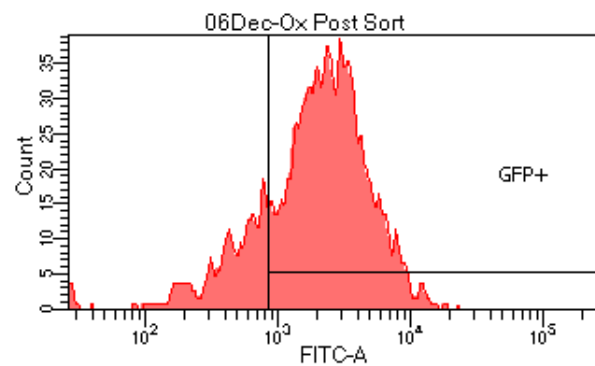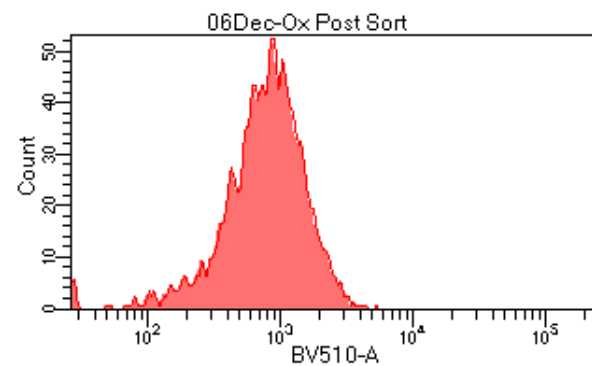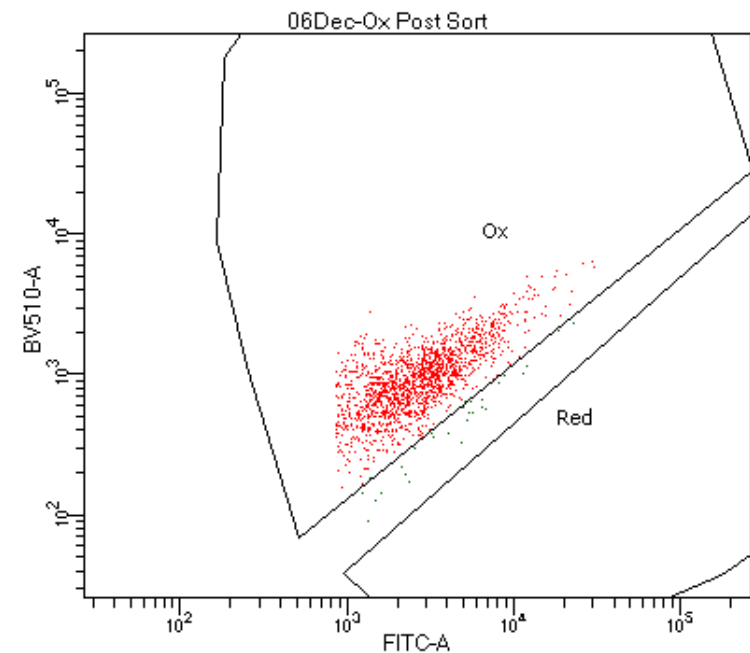

Tube: Ox Post Sort

| Population | #Events | %Parent | %Total |
|------------|---------|---------|--------|
| All Events | 2,480   | ####    | 100.0  |
| P          | 2,342   | 94.4    | 94.4   |
| S1         | 2,333   | 99.6    | 94.1   |
| S2         | 2,315   | 99.2    | 93.3   |
| S3         | 2,098   | 90.6    | 84.6   |
| S4         | 2,084   | 99.3    | 84.0   |
| GFP+       | 1,623   | 77.9    | 65.4   |
| Ox         | 1,590   | 98.0    | 64.1   |
| Red        | 0       | 0.0     | 0.0    |

|                  |                               |
|------------------|-------------------------------|
| Experiment Name: | 05EDec2016 Bac sorting        |
| Specimen Name:   | 06Dec                         |
| Tube Name:       | Ox Post Sort                  |
| Record Date:     | Dec 6, 2016 4:23:30 PM        |
| SOP:             | Administrator                 |
| GUID:            | 4cbcd5b-3037-45e0-933c-910... |

  

| Population | #Events | %Parent | FITC-A<br>Median | BV510-A<br>Median |
|------------|---------|---------|------------------|-------------------|
| S4         | 2,084   | 99.3    | 1,986            | 781               |
| GFP+       | 1,623   | 77.9    | 2,518            | 894               |
| Ox         | 1,590   | 98.0    | 2,494            | 901               |
| Red        | 0       | 0.0     | ####             | ####              |

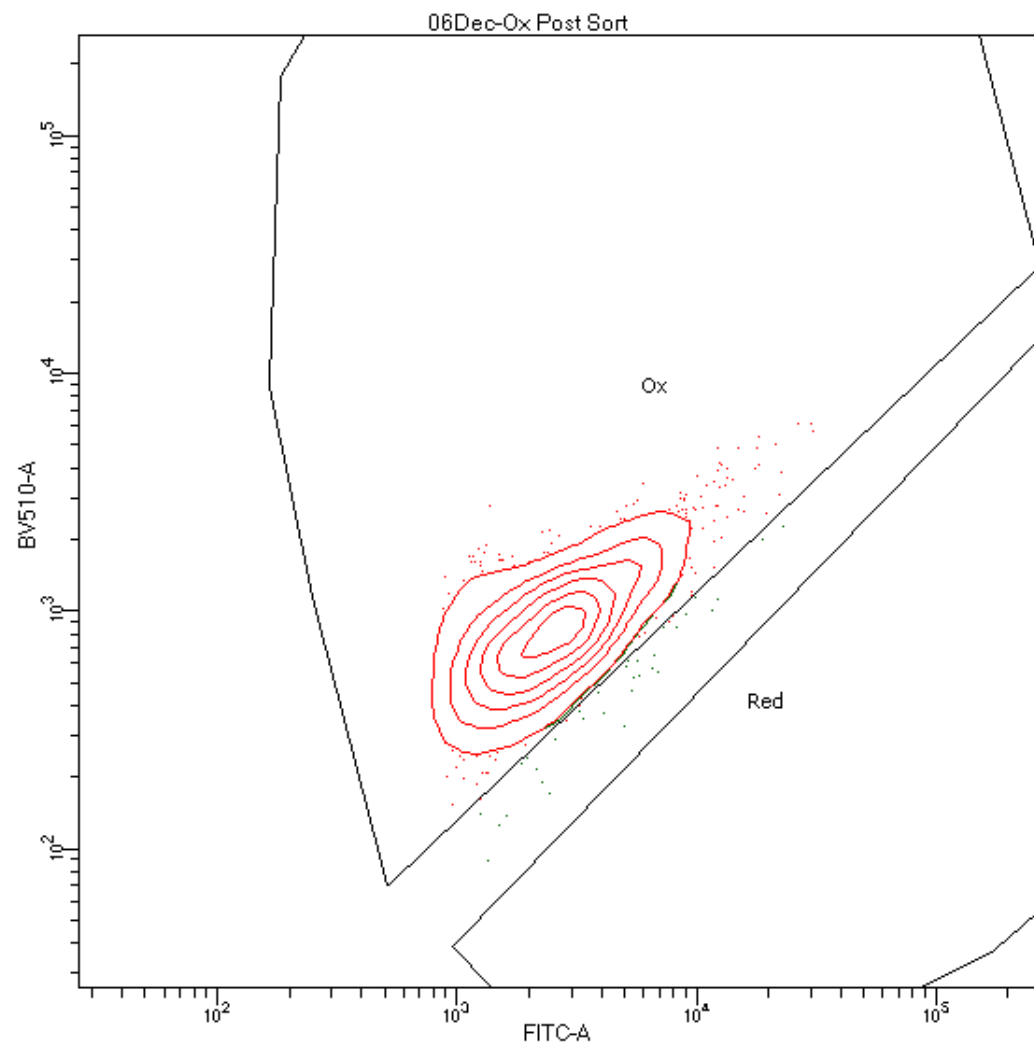

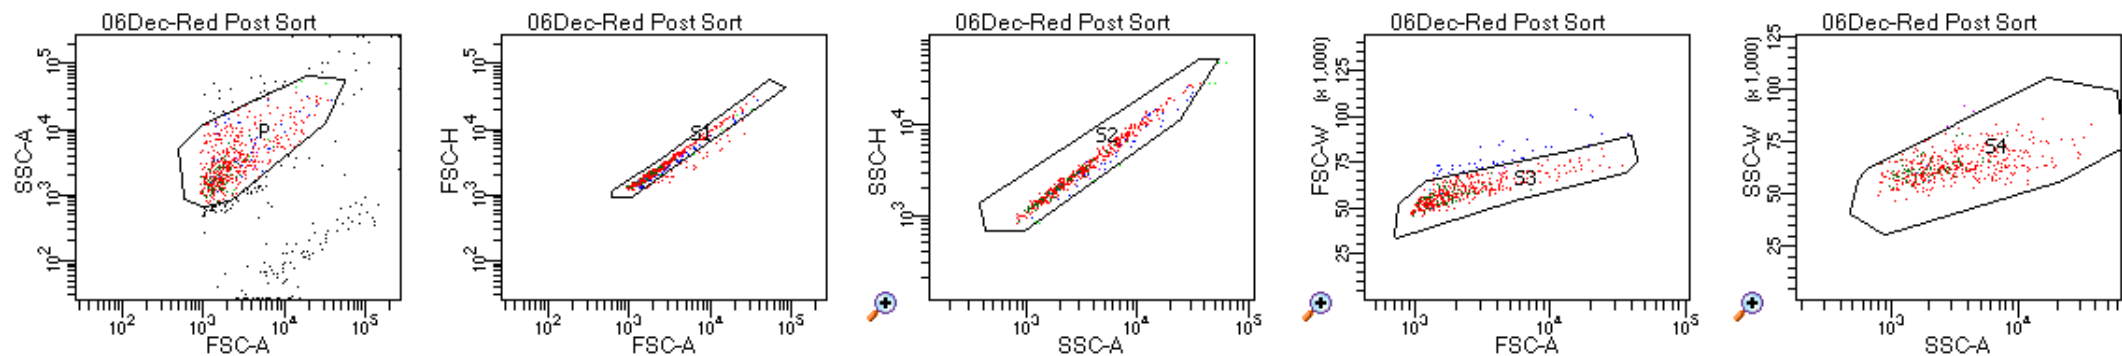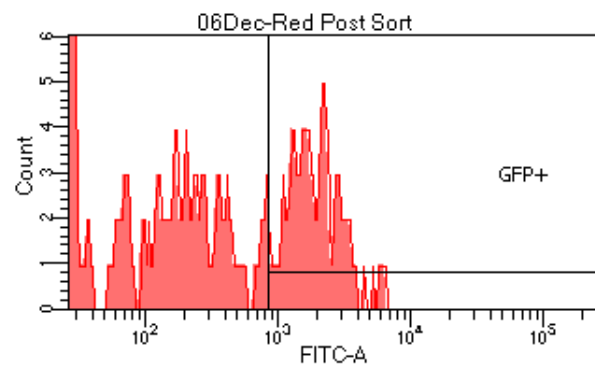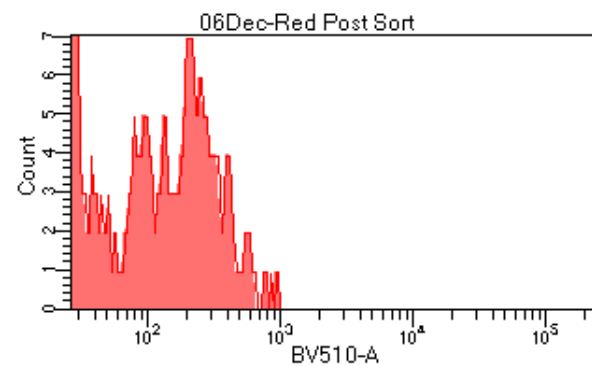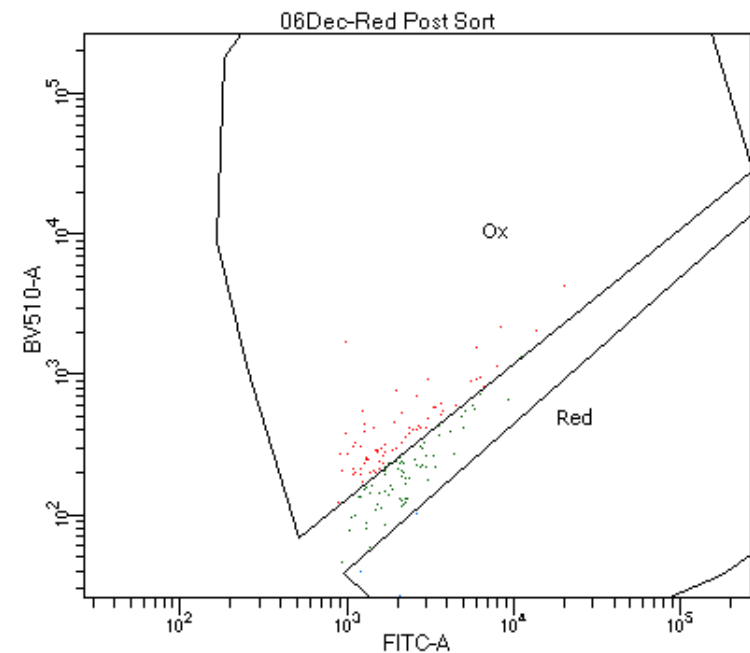

Tube: Red Post Sort

| Population | #Events | %Parent | %Total |
|------------|---------|---------|--------|
| All Events | 716     | ####    | 100.0  |
| P          | 520     | 72.6    | 72.6   |
| S1         | 488     | 93.8    | 68.2   |
| S2         | 480     | 98.4    | 67.0   |
| S3         | 442     | 92.1    | 61.7   |
| S4         | 439     | 99.3    | 61.3   |
| GFP+       | 149     | 33.9    | 20.8   |
| Ox         | 73      | 49.0    | 10.2   |
| Red        | 3       | 2.0     | 0.4    |

Experiment Name: 05EDec2016 Bac sorting  
 Specimen Name: 06Dec  
 Tube Name: Red Post Sort  
 Record Date: Dec 6, 2016 4:24:19 PM  
 SOP: Administrator  
 GUID: 62e0500e-311c-4bb2-ae4f-c8e...

| Population | #Events | %Parent | FITC-A<br>Median | BV510-A<br>Median |
|------------|---------|---------|------------------|-------------------|
| S4         | 439     | 99.3    | 258              | 114               |
| GFP+       | 149     | 33.9    | 2,055            | 247               |
| Ox         | 73      | 49.0    | 1,646            | 375               |
| Red        | 3       | 2.0     | 2,064            | 39                |

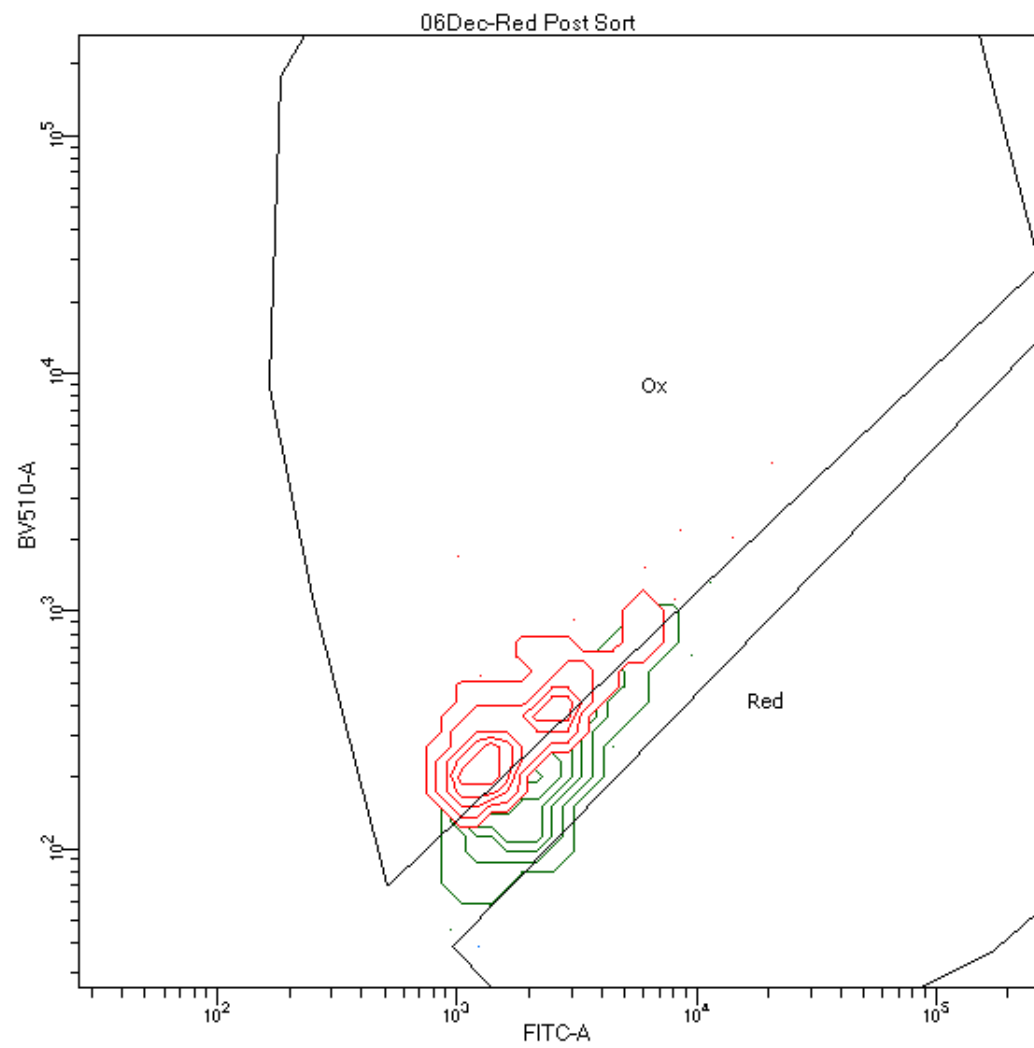

Supplement: supp [file elife-80218-supp-v1.zip]
