# Supplementary material for: Biosensor-integrated transposon mutagenesis reveals rv0158 as a coordinator of redox homeostasis in Mycobacterium tuberculosis
Source: eLife. 2023 Aug 29;12:e80218. doi: 10.7554/eLife.80218 (PMC10501769; doi:10.7554/eLife.80218)
Supplement: Figure 1—figure supplement 2—source data 1. [file elife-80218-fig1-figsupp2-data1.xlsx]

## Sheet: Sheet 1
	EmsH OX
WT Mtb	0.366667	0.152753	3
Tn Lib	4.51667	0.500833	3
WT Mtb+ CHP	98.7767	0.712484	3
1	20.8667	1.24231	3
2	40.775	3.35876	3
3	93.0733	1.75386	3
