# Supplementary material for: Biosensor-integrated transposon mutagenesis reveals rv0158 as a coordinator of redox homeostasis in Mycobacterium tuberculosis
Source: eLife. 2023 Aug 29;12:e80218. doi: 10.7554/eLife.80218 (PMC10501769; doi:10.7554/eLife.80218)
Supplement: Figure 1—figure supplement 3—source data 1. [file elife-80218-fig1-figsupp3-data1.xlsx]

## Sheet: Figure 3a
WT Mtb	3539.83	344.875	6
Tn Lib	2452.33	108.671	6
EMSH OXD Tn	53563	1470.77	6
Mtb + CHP	118070	958.446	6
	mean	sd

## Sheet: Figure 3b
	WT Mtb						Tn Lib						EMSHOXD Tn
Untreated	150	139	132	118			207	212	215	205			1580	1553	1563	1560
with Antioxidants	75	75	75	71			150	146	158	155			396	392	391	410
