# Supplementary material for: Biosensor-integrated transposon mutagenesis reveals rv0158 as a coordinator of redox homeostasis in Mycobacterium tuberculosis
Source: eLife. 2023 Aug 29;12:e80218. doi: 10.7554/eLife.80218 (PMC10501769; doi:10.7554/eLife.80218)
Supplement: Figure 2—source data 1. [file elife-80218-fig2-data1.xlsx]

## Sheet: Figure 2A
WT Mtb						Tn Lib						EMSHOXD Tn						250μM CHP
344.228	592.692	8.86485	287.786			536.331	418.487	465.178	375.957			1005.62	1099.93	1094.81	977.732			1414.89	1643.92	1292.93	1554.88

## Sheet: Figure 2B
WT Mtb						Tn Lib						EMSHOXD Tn						250μM CHP
0.030291	0.044419	0.045233	0.046977			0.054878	0.048049	0.047866	0.042134			0.233761	0.230948	0.196881	0.222263			0.341686	0.155291	0.153488	0.149884

## Sheet: Figure 2C
	Tn Lib						EMSHOXD Tn
ahpC	0.942689	1.01794					7.04141	6.63406
ahpD	0.807238	0.796452					1.6204	1.63079
trxB1	0.815155	0.912822					2.64931	2.45336
sigH	0.877585	0.832587	0.826723				1.72243	1.65214	1.63971
sufR	1.0596	1.05018	1.0467				2.11112	2.20446	2.02471
alkA	1.59655	1.47512	1.61984				2.81166	2.80693

## Sheet: Figure 2D
	WTMtb			TnLib			EMSHOXD Tn
0	0.399302	0.0068568	2	0.41632	0.00708534	2	0.651914	0.00352664	2
15	0.626609	0.00714874	2	0.734196	0.0167678	2	0.848585	0.00512878	2
30	0.590249	0.00114416	2	0.666175	0.000985425	2	0.888569	0.00992968	2
45	0.530519	0.00894505	2	0.666886	0.00173275	2	0.871028	0.00522773	2
60	0.453193	0.0198671	2	0.583788	0.000290128	2	0.821686	0.00635882	2
75	0.423303	0.0136435	2	0.516975	0.0135427	2	0.794566	0.00795424	2
90	0.389074	0.00452936	2	0.452528	0.000313997	2	0.771597	0.00794497	2

## Sheet: Figure 2E
		WT Mtb						EMSH OXD Tn
	Input	160000000	190000000					120000000	100000000
CHP	50μM	150000000	340000000					40000000	70000000
CHP	100μM	230000000	320000000					40000000	30000000
Diamide	2.5mM	170000000	290000000					44000000	40000000
Diamide	5 mM	260000000	190000000					60000000	40000000
H2O2	5mM	260000000	210000000					40000000	30000000
Menadione	1X MIC	220000000	260000000					40000000	30000000
