# Supplementary material for: Biosensor-integrated transposon mutagenesis reveals rv0158 as a coordinator of redox homeostasis in Mycobacterium tuberculosis
Source: eLife. 2023 Aug 29;12:e80218. doi: 10.7554/eLife.80218 (PMC10501769; doi:10.7554/eLife.80218)
Supplement: Figure 3—figure supplement 2—source data 1. [file elife-80218-fig3-figsupp2-data1.xlsx]

## Sheet: Figure 2a
	MFI (CellROX)
Mtb CDC1551	3097	3059	3039	3040
Rv3450	2577	3046	3036	3072	2777	2966
Rv3862c	3389	3141	3051	3100
Rv1791	3236	3248	3210	3261
Rv2175	3202	3276	3316	3427
Rv1013	3785	3818	3583	3689
Rv1043	4081	3790	3833	3589
Rv2873	4114	4164	4085	4235
Rv3868	4243	4264	4151	4141
Rv1493	4543	4529	4586	4070
Rv2268	5586	5380	5372	5557
CHP	21254	22388	21121	24050

## Sheet: Figure 2b
	TUNEL MFI
Mtb CDC1551	523	415	338	554	476	396
Rv3450	1952	2548	2286	1787
Rv3862c	1503	2185	1914	1280
Rv2175	890	836	823	1028
Rv1013	1711	1277	1848	1769
Rv1043	762	1043	910	1210
Rv2873	1094	893	923	1146
Rv3868	1092	935	764	670
Rv2268	1690	1744	1555	1562
