# Supplementary material for: Biosensor-integrated transposon mutagenesis reveals rv0158 as a coordinator of redox homeostasis in Mycobacterium tuberculosis
Source: eLife. 2023 Aug 29;12:e80218. doi: 10.7554/eLife.80218 (PMC10501769; doi:10.7554/eLife.80218)
Supplement: Figure 3—source data 1. [file elife-80218-fig3-data1.xlsx]

## Sheet: Figure 3B
Mtb H37Rv	-282.97	-280.075	-280.405	-281.318
Mtb CDC1551	-279.406	-279.574	-283.062	-277.834
rv2268:Tn	-271.637	-269.876	-270.144	-270.487
rv2175:Tn	-272.204	-271.578	-268.368	-268.938
rv2873:Tn	-270.257	-272.032	-267.952	-268.383
rv1493:Tn	-265.519	-268.494	-266.277	-265.079
rv3450:Tn	-269.14	-267.375	-267.161	-265.134
rv1013:Tn	-262.362	-266.934	-266.534	-265.442
rv1791:Tn	-265.76	-266.029	-266.168	-265.78
rv3862:Tn	-259.802	-261.21	-265.382	-264.459
rv1774:Tn	-260.707	-261.656	-261.563	-260.38
rv3868:Tn	-248.406	-257.613	-258.379	-256.316
