# Supplementary material for: Biosensor-integrated transposon mutagenesis reveals rv0158 as a coordinator of redox homeostasis in Mycobacterium tuberculosis
Source: eLife. 2023 Aug 29;12:e80218. doi: 10.7554/eLife.80218 (PMC10501769; doi:10.7554/eLife.80218)
Supplement: Figure 4—figure supplement 1—source data 1. [file elife-80218-fig4-figsupp1-data1.xlsx]

## Sheet: Figure S6b
	WT Mtb16S			rv0158 KO 16S			rv0158 Comp 16S			WT Mtbrv0158			rv0158KO rv0158			rv0158 Comp rv0158
1	1.04629	1.19019	1.06774	1.30117	1.14025	1.64013	1.05388	1.24667	1.6312	1.11601	1.15035	1.10517	1.06508	1.07888	1.65555	1.37211	1.19169	1.14952
2	1.05049	1.19643	1.08071	1.28815	1.14333	1.63226	1.0555	1.25965	1.65459	1.13409	1.17087	1.12643	1.07496	1.09589	1.66534	1.3949	1.20705	1.16815
3	1.05142	1.20267	1.08823	1.2861	1.15152	1.62762	1.05411	1.26316	1.66169	1.14519	1.18497	1.13965	1.08792	1.10581	1.67496	1.39485	1.21955	1.17934
4	1.05231	1.20403	1.09428	1.28562	1.14805	1.62356	1.05604	1.26511	1.66466	1.15274	1.19722	1.15362	1.09686	1.1104	1.68515	1.39917	1.23388	1.18541
5	1.05567	1.20929	1.09962	1.28881	1.14858	1.61922	1.05729	1.2626	1.6656	1.16163	1.20611	1.16315	1.10405	1.11813	1.69109	1.40379	1.24181	1.19384
6	1.05911	1.21164	1.10583	1.29543	1.15315	1.62145	1.06265	1.26401	1.6677	1.16681	1.21234	1.1709	1.11134	1.13063	1.69989	1.41096	1.24381	1.20115
7	1.06851	1.22663	1.11794	1.30744	1.16174	1.62714	1.07358	1.27287	1.67098	1.17126	1.21767	1.17781	1.11681	1.13441	1.70272	1.41293	1.24756	1.20514
8	1.08517	1.24543	1.13824	1.32854	1.18124	1.64278	1.09481	1.29535	1.69272	1.17724	1.22331	1.1842	1.1253	1.1446	1.70981	1.41744	1.25371	1.21153
9	1.11149	1.28419	1.17252	1.36667	1.21599	1.67615	1.13077	1.33285	1.73722	1.181	1.22897	1.19205	1.12975	1.14859	1.71487	1.42337	1.25839	1.21605
10	1.16752	1.3528	1.24818	1.44528	1.28095	1.74578	1.20377	1.40898	1.83048	1.18656	1.23385	1.19665	1.13341	1.1543	1.7174	1.42686	1.2615	1.22374
11	1.27065	1.48994	1.381	1.59255	1.40987	1.88502	1.34317	1.54798	2.00571	1.19248	1.24	1.20273	1.13854	1.1582	1.7228	1.42944	1.2668	1.22679
12	1.46758	1.7363	1.62845	1.86155	1.64927	2.13823	1.59563	1.80664	2.32374	1.19656	1.24609	1.20777	1.14314	1.16226	1.72965	1.42991	1.27213	1.23223
13	1.8132	2.16429	2.04798	2.31746	2.05914	2.57847	2.02766	2.24925	2.84015	1.19918	1.24932	1.212	1.14703	1.16227	1.7309	1.43609	1.28595	1.23594
14	2.36598	2.76292	2.65825	2.94317	2.64336	3.19559	2.64996	2.86571	3.43704	1.20483	1.25794	1.21711	1.15123	1.16604	1.73689	1.43961	1.28987	1.24153
15	2.97058	3.25624	3.17595	3.43126	3.13556	3.69359	3.17296	3.34622	3.83753	1.21013	1.26072	1.22285	1.15508	1.17299	1.73873	1.44297	1.29432	1.24807
16	3.38687	3.58142	3.53018	3.76905	3.45877	4.0349	3.51988	3.67302	4.14228	1.21809	1.26416	1.23242	1.16036	1.18011	1.74209	1.4479	1.2931	1.25576
17	3.70392	3.87219	3.81856	4.0684	3.74456	4.31436	3.8231	3.96236	4.40509	1.22677	1.27676	1.24143	1.16271	1.17999	1.74643	1.45548	1.31041	1.26487
18	3.99674	4.13819	4.07954	4.33074	3.99862	4.56182	4.08772	4.21295	4.62979	1.24297	1.288	1.25454	1.1665	1.18932	1.75194	1.47055	1.31583	1.28096
19	4.22629	4.32782	4.27746	4.52196	4.1769	4.74825	4.29276	4.39858	4.79289	1.26836	1.31074	1.27556	1.17043	1.19048	1.75401	1.48959	1.34112	1.30213
20	4.41175	4.48515	4.4425	4.68315	4.32232	4.90164	4.45866	4.54816	4.91912	1.31062	1.3459	1.31277	1.1741	1.19217	1.75654	1.52277	1.37509	1.34298
21	4.55594	4.61956	4.56778	4.80843	4.45765	5.02122	4.58776	4.67488	5.03783	1.38546	1.40884	1.37441	1.17911	1.20356	1.76186	1.58421	1.42528	1.4124
22	4.67686	4.70728	4.67788	4.91251	4.54582	5.11821	4.69302	4.76976	5.12584	1.51589	1.51926	1.48563	1.18232	1.2016	1.76606	1.69494	1.5281	1.53186
23	4.76959	4.79932	4.76259	4.99384	4.62244	5.19496	4.7856	4.84541	5.18727	1.72635	1.70421	1.66127	1.18508	1.21178	1.7675	1.87695	1.68787	1.73305
24	4.85397	4.87387	4.83126	5.06766	4.68616	5.25615	4.85281	4.9061	5.24757	2.05235	1.99591	1.94869	1.18854	1.2106	1.77364	2.16862	1.96377	2.04017
25	4.91715	4.94104	4.8963	5.13105	4.74224	5.3041	4.92138	4.96438	5.29955	2.48959	2.40769	2.33973	1.19283	1.21856	1.78066	2.58606	2.33595	2.45859
26	4.97666	4.97849	4.94569	5.17449	4.79202	5.35415	4.96838	5.00934	5.34208	2.99276	2.90145	2.82586	1.19801	1.22554	1.78155	3.09809	2.79159	2.93641
27	5.02611	5.02527	4.994	5.21644	4.82484	5.38082	5.01128	5.04483	5.37802	3.40641	3.35166	3.26258	1.20443	1.23383	1.78822	3.56705	3.19647	3.32813
28	5.07411	5.06078	5.02757	5.26584	4.86651	5.41971	5.07152	5.08333	5.40668	3.75158	3.69984	3.61673	1.21109	1.24263	1.79934	3.92757	3.52224	3.64764
29	5.10762	5.09111	5.0681	5.29112	4.89163	5.44198	5.09118	5.11567	5.44253	4.0532	4.00127	3.92485	1.22191	1.25408	1.81244	4.22757	3.83182	3.92081
30	5.14095	5.11467	5.09136	5.32151	4.92122	5.45391	5.12716	5.14024	5.46417	4.30953	4.2618	4.18579	1.23784	1.28298	1.84069	4.4922	4.05188	4.1657
31	5.17534	5.14956	5.12235	5.34783	4.94919	5.47809	5.14883	5.16839	5.4853	4.5176	4.47635	4.40582	1.2672	1.31817	1.87774	4.70565	4.28964	4.3538
32	5.20101	5.16495	5.14291	5.37485	4.97292	5.504	5.17668	5.18853	5.51509	4.68583	4.64086	4.56517	1.31639	1.39928	1.9562	4.87119	4.41667	4.50538
33	5.21425	5.19855	5.17257	5.3908	4.98707	5.51816	5.19537	5.2031	5.51705	4.80764	4.77251	4.70028	1.40735	1.52859	2.08595	5.00039	4.53034	4.62454
34	5.23677	5.20474	5.18973	5.41186	5.00315	5.5313	5.21402	5.23129	5.52701	4.91631	4.87395	4.79731	1.56308	1.75667	2.31851	5.10352	4.63815	4.70704
35	5.26056	5.22042	5.20557	5.43639	5.0284	5.55545	5.23514	5.24841	5.54063	4.99771	4.96004	4.90972	1.82545	2.11683	2.67245	5.18425	4.74667	4.78745
36	5.27596	5.253	5.22779	5.45704	5.03972	5.57239	5.261	5.26081	5.54956	5.0751	5.03622	4.98949	2.23334	2.64254	3.18702	5.25346	4.78232	4.85638
37	5.28565	5.25365	5.24905	5.4627	5.06077	5.59694	5.25774	5.28872	5.55551	5.12935	5.09231	5.02289	2.74709	3.07955	3.72995	5.30334	4.84122	4.89877
38	5.30616	5.2704	5.26166	5.47424	5.0878	5.60298	5.27853	5.29786	5.56747	5.18824	5.14314	5.09879	3.20204	3.39504	4.10792	5.35244	4.88007	4.94486
39	5.31892	5.29281	5.27731	5.49486	5.09975	5.61165	5.29115	5.30391	5.56689	5.22853	5.18429	5.14904	3.57188	3.69168	4.43037	5.39132	4.91795	4.98276
40	5.33483	5.30697	5.28288	5.49947	5.12488	5.61263	5.30252	5.3118	5.5716	5.26376	5.22024	5.1909	3.90294	3.94516	4.73691	5.42181	5.00147	5.01436
