# Supplementary material for: Biosensor-integrated transposon mutagenesis reveals rv0158 as a coordinator of redox homeostasis in Mycobacterium tuberculosis
Source: eLife. 2023 Aug 29;12:e80218. doi: 10.7554/eLife.80218 (PMC10501769; doi:10.7554/eLife.80218)
Supplement: Figure 4—source data 1. [file elife-80218-fig4-data1.xlsx]

## Sheet: Figure 4A
Mtb H37Rv	-282.97	-280.075	-280.405	-281.318
rv0158 KO	-262.77	-263.99	-264.617	-273.84
rv0158 Comp	-275.633	-277.153	-276.526	-274.965

## Sheet: Figure 4B
WT Mtb						rv0158 KO						rv0158 Comp						mshA KO
4761	6478	5358	6413	7011	7472	13977	11018	20645	15176	17901	17222	6766	6712	4614	3029			12095	12806	62229	53751	20003	16770

## Sheet: Figure 4C
WT Mtb						rv0158 KO						rv0158 Comp
1058	1030	1003	999	975	970	1472	1453	1433	1457	1460	1429	1158	1116	1146	1134	1156	1174

## Sheet: Figure 4D
rv0158 KO						rv0158 Comp
2.48116	2.62359	1.76677	1.82215			0.479277	0.456669	0.447626	0.448757

## Sheet: Figure 4E
	rv0158KO								rv0158 Comp								WT Mtb +CHP
Fold Change in A560nm	4.85917	4.63268	4.14882	3.26765	3.42913	3.53823			1.24539	1.7818	0.469416	1.24539	1.22789	0.863994			7.45973	7.3754	7.79704	8.60788	7.45973	6.64889			8

## Sheet: Figure 4F
	WT Mtb						rv0158 KO						rv0158 Comp
NAD+/NADH	1.89585	1.74946	1.42261	1.42261			3.23959	3.15156	2.4315	2.4315			1.9494	2.24836	1.78658	1.78658			1

## Sheet: Figure 4G
	WT Mtb						rv0158 KO						rv0158 Comp
NADH	0.089615	0.103462	0.103077	0.106923	0.117308	0.107692	0.093913	0.094348	0.093478	0.098261	0.093043	0.104348	0.059565	0.083913	0.070435	0.06087	0.076522	0.096087
NAD+	0.198846	0.179615	0.176538	0.177308	0.181154	0.197692	0.301304	0.276957	0.286522	0.285217	0.281304	0.261304	0.166957	0.166522	0.198696	0.173913	0.184348	0.151304
