# Supplementary material for: Biosensor-integrated transposon mutagenesis reveals rv0158 as a coordinator of redox homeostasis in Mycobacterium tuberculosis
Source: eLife. 2023 Aug 29;12:e80218. doi: 10.7554/eLife.80218 (PMC10501769; doi:10.7554/eLife.80218)
Supplement: Figure 5—figure supplement 1—source data 1. [file elife-80218-fig5-figsupp1-data1.xlsx]

## Sheet: Sheet1
	rv0158 KO			rv0158 Comp
rv0077C	9.53916	10.3539		2.85451	4.02299
groEL2	15.4975	18.0899		1.41325	0.73863
groES	9.03714	10.0562		1.38961	1.55977
vapB35	4.90159	5.14937		1.99776	2.31622
mbtC	7.7964	11.2715		4.273	4.45161
icl1	6.52643	9.71487		1.98613	2.30475
prpD	3.32001	6.38469		-1.62728	1.12563
prpC	5.49913	11.3502		1.16412	1.37555
katG	3.7	3.46	4.14	1.85	1.78	1.79
trxC	2.13	1.86	2.39	-1.10464	-1.0681	1.05
rv0081	-3.35	-3.13	-3.38	-2.49	-2.29	-1.96
rv0082	-1.86	-2.52	-2.32	-1.16	-1.07	-1.32
rv0823	-4.44	-4.03	-3.91	-1.27	-1.31	-1.25
desA1	-2.69639	-2.45466	-2.06939	1.09	-1.02765	-1.25281
desA3	-2.3841	-2.21472	-2.30678	-1.21058	-1.26687	-1.13494
fadD9	-1.94	-2.16	-1.72	1.27	1.35	1.52
leuD	-1.71	-1.78	-1.65	1.18	1.22	1.42
leuC	-2.55	-2.52	-2.24	-1.07	-1.02	1.08
