# Supplementary material for: Biosensor-integrated transposon mutagenesis reveals rv0158 as a coordinator of redox homeostasis in Mycobacterium tuberculosis
Source: eLife. 2023 Aug 29;12:e80218. doi: 10.7554/eLife.80218 (PMC10501769; doi:10.7554/eLife.80218)
Supplement: Figure 5—figure supplement 2—source data 1. [file elife-80218-fig5-figsupp2-data1.xlsx]

## Sheet: Overlap_allCondition_log
--------------------ALL	CONDITION	OVERLAP	data------------------------
Intersection	acidicPH5.5	Hypoxia_EHR	Hypoxia_DosR	H2O2_stress	NO_stress
Rv0158	18	18	6	30	30
P-value	acidicPH5.5	Hypoxia_EHR	Hypoxia_DosR	H2O2_stress	NO_stress
Rv0158	0.0200652	0.0411109	0.0270105	1.6742e-07	1.77346e-06
Odds_Ratio	acidicPH5.5	Hypoxia_EHR	Hypoxia_DosR	H2O2_stress	NO_stress
Rv0158	1.81061	1.64875	2.86554	3.43045	3.01288
Individual_group_data
Genome_size	4008
listA: Rv0158,	listB: acidicPH5.5	https://doi.org/10.1016/j.chom.2007.09.006
GeneOverlap	object:
listA	size=203
listB	size=212
Intersection	size=18
Overlapping	p-value=0.02
Jaccard	Index=0.0
listA: Rv0158,	listB: Hypoxia_EHR	https://doi.org/10.1371/journal.pone.0001502
GeneOverlap	object:
listA	size=203
listB	size=230
Intersection	size=18
Overlapping	p-value=0.041
Jaccard	Index=0.0
listA: Rv0158,	listB: Hypoxia_DosR	https://doi.org/10.1371/journal.pone.0001502
GeneOverlap	object:
listA	size=203
listB	size=46
Intersection	size=6
Overlapping	p-value=0.027
Jaccard	Index=0.0
listA: Rv0158,	listB: H2O2_stress	Voskuil et al., 2011
GeneOverlap	object:
listA	size=203
listB	size=213
Intersection	size=30
Overlapping	p-value=1.7e-07
Jaccard	Index=0.1
listA: Rv0158,	listB: NO_stress	https://pubmed.ncbi.nlm.nih.gov/21734908/
GeneOverlap	object:
listA	size=203
listB	size=237
Intersection	size=30
Overlapping	p-value=1.8e-06
Jaccard	Index=0.1
