# Supplementary material for: Biosensor-integrated transposon mutagenesis reveals rv0158 as a coordinator of redox homeostasis in Mycobacterium tuberculosis
Source: eLife. 2023 Aug 29;12:e80218. doi: 10.7554/eLife.80218 (PMC10501769; doi:10.7554/eLife.80218)
Supplement: Figure 5—source data 1. [file elife-80218-fig5-data1.xlsx]

## Sheet: Figure 5
		Rv0158 transcriptome						Rv0158 transcriptome					Rv0158 transcriptome			Fold change
Functional category based on MycoBrowser database	Mtb genome	Number of genes;FC>1.5	Number of genes;FC>2				Mtb genome	FC>1.5	FC>2			Mtb genome	FC>1.5	FC>2		FC>1.5	FC>2
cell wall and cell processes	0.191468	23	4			cell wall and cell processes	19.1468	0.100877	0.0533333		cell wall and cell processes	19.1468	10.0877	5.33333		0.526862	0.27855
conserved hypotheticals	0.258433	50	15			conserved hypotheticals	25.8433	0.219298	0.2		conserved hypotheticals	25.8433	21.9298	20		0.848569	0.773895
information pathways	0.060268	8	0			information pathways	6.0268	0.0350877	0		information pathways	6.0268	3.50877	0		0.582195	0
intermediary metabolism and respiration	0.232143	55	16			intermediary metabolism and respiration	23.2143	0.241228	0.213333		intermediary metabolism and respiration	23.2143	24.1228	21.3333		1.03914	0.918974
lipid metabolism	0.06746	37	15			lipid metabolism	6.746	0.162281	0.2		lipid metabolism	6.746	16.2281	20		2.40558	2.96472
PE/PPE	0.041667	11	4			PE/PPE	4.1667	0.0482456	0.0533333		PE/PPE	4.1667	4.82456	5.33333		1.15789	1.27999
regulatory proteins	0.049107	16	7			regulatory proteins	4.9107	0.0701754	0.0933333		regulatory proteins	4.9107	7.01754	9.33333		1.42903	1.90061
virulence, detoxification, adaptation	0.059524	22	9			virulence, detoxification, adaptation	5.9524	0.0964912	0.12		virulence, detoxification, adaptation	5.9524	9.64912	12		1.62105	2.01599
		228	75
