# Supplementary material for: Biosensor-integrated transposon mutagenesis reveals rv0158 as a coordinator of redox homeostasis in Mycobacterium tuberculosis
Source: eLife. 2023 Aug 29;12:e80218. doi: 10.7554/eLife.80218 (PMC10501769; doi:10.7554/eLife.80218)
Supplement: Figure 6—figure supplement 1—source data 1. [file elife-80218-fig6-figsupp1-data1.xlsx]

## Sheet: Sheet 1
rv0158 KO								rv0158 COMP
1.19403	1.12672	1.23843	1.19573					0.878788	0.898072	1.07236	1.06999
