# Supplementary material for: Biosensor-integrated transposon mutagenesis reveals rv0158 as a coordinator of redox homeostasis in Mycobacterium tuberculosis
Source: eLife. 2023 Aug 29;12:e80218. doi: 10.7554/eLife.80218 (PMC10501769; doi:10.7554/eLife.80218)
Supplement: Figure 6—source data 2. [file elife-80218-fig6-data2.xlsx]

## Sheet: Figure 6C
	rv0158 KO						rv0158 Comp
MAMES	0.830591	0.683204	0.537781	0.466529	0.659301	0.69677	1.14971	1.05095	1.02854	0.789978
FAMES	1.36355	1.33745	1.21879	1.31211	1.55073	1.59114	0.787767	0.625948	0.856656	0.918851	0.643524

## Sheet: Figure 6D
	rv0158KO												rv0158Comp												WTMtb
0	46.861	48.824	48.328	48.475	48.188	48.824	49.051	48.252	47.827	46.573	50.307	49.619	33.499	36.407	35.887	35.516	36.191	35.978	35.053	34.446	35.289	35.254	33.661	33.12	54.559	55.789	55.9	55.623	54.728	54.029	55.247	55.063	54.464	56.003	54.681	54.548
1	47.74	48.707	47.043	47.997	46.626	47.599	49.454	47.18	47.317	47.246	49.463	48.232	34.071	35.645	36.348	35.756	35.607	35.711	35.517	34.653	35.061	35.195	34.471	32.964	55.052	56.176	55.146	54.566	54.203	54.502	56.23	54.542	53.16	53.798	53.818	54.004
2	48.54	49.466	47.743	47.849	49.133	47.25	48.702	46.742	47.24	46.802	49.836	47.721	34.891	36.828	35.642	36.112	35.776	34.411	36.426	34.072	33.252	35.264	33.519	32.402	54.516	54.703	54.32	55.217	53.736	53.115	55.45	53.558	54.525	53.229	53.024	52.233
3	48.16	49.919	49.105	48.637	49.036	49.995	50.008	48.827	48.797	48.319	51.784	49.779	35.284	35.806	36.526	35.448	35.71	35.048	35.586	33.463	33.627	36.534	34.546	32.695	54.422	53.018	54.319	53.794	52.99	52.315	52.861	52.157	51.783	52.906	53.264	52.653
4	52.184	51.918	50.474	50.493	50.501	50.115	52.2	48.866	50.461	49.574	52.309	49.663	35.695	35.933	36.551	35.42	35.755	35.293	35.672	35.083	34.919	37.327	34.002	32.113	54.772	53.541	54.063	53.476	53.393	53.872	52.769	53.313	52.382	52.712	52.322	50.536
5	53.59	53.195	51.796	53.073	53.089	51.721	54.107	51.541	52.612	51.271	54.738	49.745	37.635	36.404	37.465	36.309	36.684	36.52	35.616	36.526	33.463	36.359	34.857	31.802	53.859	51.885	52.297	51.595	50.912	51.893	52.936	53.283	51.322	52.869	49.864	49.873
6	54.56	55.98	53.571	54.183	54.932	53.947	54.295	51.553	54.036	51.811	55.329	52.49	37.462	36.678	37.838	37.835	37.678	36.703	36.903	36.548	35.381	36.912	34.161	32.849	53.797	53.305	52.354	52.102	52.316	49.911	57.389	51.217	50.159	51.807	51.26	50.619
7	56.708	56.858	55.771	56.662	55.269	54.067	56.305	54.087	56.012	54.067	57.834	53.459	38.678	38.777	38.105	38.287	37.845	38.056	37.745	36.339	35.386	38.142	35.163	32.741	52.356	52.317	50.499	52.337	51.81	50.85	52.934	51.029	50.718	51.588	49.998	48.661
8	57.796	58.021	56.279	57.583	58.097	57.337	57.493	54.333	56.654	56.022	58.913	57.029	38.769	38.615	39.91	38.17	39.45	37.669	39.01	35.942	35.828	36.4	36.561	33.604	53.492	52.46	50.955	50.755	51.714	49.482	52.119	51.318	52.052	51.011	50.033	50.314
9	61.743	60.789	58.676	58.973	59.939	58.641	59.407	56.207	58.044	57.49	61.046	59.814	42.242	39.605	40.4	39.969	40.517	39.355	39.307	37.818	36.12	38.182	37.664	35.428	51.548	51.341	51.427	51.603	52.121	49.233	51.609	49.46	50.773	50.42	49.591	47.969
10	62.734	63.387	60.965	61.061	60.807	60.474	60.722	58.86	61.002	60.912	62.944	61.71	42.006	41.268	41.948	41.487	41.816	41.226	41.94	39.951	38.211	41.07	38.179	35.931	53.863	54.182	51.4	51.59	51.025	51.677	51.485	51.941	50.198	50.078	49.551	49.226
11	67.155	65.552	64.306	63.6	62.262	63.319	64.469	61.955	64.201	62.509	65.077	65.761	43.205	43.741	43.375	42.703	42.675	42.524	42.762	40.362	38.739	42.362	39.808	38.979	55.514	53.421	52.285	52.965	50.512	50.904	51.949	51.308	50.293	51.641	49.737	48.052
12	69.891	66.476	66.889	66.37	65.329	67.939	66.378	63.031	65.633	63.048	69.164	68.316	46.295	42.762	44.639	43.053	43.385	43.724	42.401	41.937	40.552	42.497	42.173	39.292	54.179	53.024	52.858	50.733	52	50.655	51.579	51.854	50.17	50.788	50.196	48.452
13	71.617	69.956	68.354	68.479	67.732	69.339	68.349	67.474	68.699	67.165	70.012	70.225	48.422	45.143	46.161	45.971	43.713	45.214	44.478	42.607	41.466	43.734	43.201	40.465	53.837	54.128	50.632	53.447	52.293	51.459	52.807	50.601	50.78	50.912	49.677	48.467
14	74.882	72.284	69.91	72.025	69.857	71.793	70.376	68.386	69.077	69.68	73.6	73.528	48.63	45.232	46.156	46.936	46.389	45.222	45.988	43.262	40.633	45.775	43.875	41.988	54.559	52.6	52.446	53.48	53.637	50.889	53.727	52.191	50.432	50.631	47.676	47.728
15	75.247	75.649	74.012	72.456	73.351	72.884	73.57	71.268	72.574	71.583	75.372	74.31	49.712	47.124	47.783	49.706	48.376	47.243	47.021	46.739	43.688	44.946	43.491	46.106	54.716	52.715	52.1	53.922	52.157	52.22	52.819	52.693	51.74	50.564	50.741	47.738
16	79.261	78.025	76.814	77.364	76.239	75.166	75.583	74.904	76.122	76.642	77.841	78.613	50.822	50.84	50.613	50.455	49.024	48.735	49.181	46.75	45.143	48.07	45.802	43.185	57.175	53.046	54.216	53.526	51.953	51.355	53.156	52.563	50.41	52.196	50.023	49.383
17	83.763	78.544	75.852	78.763	76.953	75.759	77.902	76.013	77.016	75.27	79.665	79.001	53.431	52.324	51.413	50.958	48.958	49.073	49.108	47.559	45.551	48.379	46.802	45.418	55.945	54.634	53.808	53.429	53.549	51.603	58.788	52.209	51.174	51.032	48.336	47.87
18	84.308	82.399	81.62	79.068	81.663	81.409	80.566	78.281	80.672	79.052	81.478	82.258	55.516	54.831	54.204	54.623	50.938	51.813	51.099	49.004	45.623	52.622	49.84	47.223	56.338	54.877	53.43	52.021	53.883	52.151	54.97	53.313	51.322	51.745	50.311	50.506
19	87.822	84.812	81.564	84.004	84.163	82.911	83.887	81.191	81.031	81.289	87.007	88.122	56.11	56.002	55.111	54.971	54.999	53.516	53.739	51.854	49.528	53.169	52.436	50.918	57.948	55.69	54.372	53.945	53.091	52.653	55.302	52.371	52.23	52.643	51.288	51.613
20	90.113	88.447	85.86	85.761	86.848	86.243	83.792	84.63	83.953	83.272	88.379	88.978	57.926	57.637	56.804	58.007	57.593	55.455	55.862	54.349	50.065	54.657	51.804	51.303	56.557	56.047	54.098	54.427	53.752	53.548	54.67	52.342	52.546	53.184	50.392	50.516
21	90.659	88.094	86.084	87.36	86.31	86.676	85.508	84.807	86.063	84.592	91.747	91.004	56.334	58.133	58.402	59.276	56.781	56.906	55.248	55.197	54.468	56.663	55.049	52.803	58.579	56.373	54.664	54.966	53.605	53.618	53.074	53.724	51.98	51.765	51.259	50.198
22	94.399	90.62	89.29	89.34	88.068	87.677	88.198	87.184	88.174	88.973	94.298	92.859	59.932	56.954	58.373	58.817	57.611	57.328	57.894	56.109	54.299	56.658	54.736	55.704	60.303	57.573	53.558	55.482	53.565	55.05	55.4	52.594	52.94	53.134	51.34	52.585
23	97.586	93.422	92.009	92.11	92.422	92.029	90.843	89.086	90.777	88.69	95.625	95.94	59.823	60.496	62.103	59.166	59.7	59.639	58.804	58.184	59.067	61.387	58.53	56.123	59.982	57.696	56.557	56.784	55.868	54.359	54.953	54.859	52.176	53.921	52.271	54.195
24	97.474	94.43	93.04	92.002	95.181	92.934	92.477	91.131	90.442	92.615	95.322	96.499	61.909	61.735	62.884	60.137	59.763	58.356	60.083	59.451	58.519	62.046	59.839	57.722	61.33	58.62	55.469	55.852	56.084	55.182	56.592	54.79	54.141	53.399	52.422	54.242
25	97.852	97.86	93.94	93.793	94.978	94.739	94.468	93.494	90.656	91.041	98.952	98.863	62.134	62.932	64.03	62.097	62.959	60.944	60.948	60.546	59.672	62.158	59.099	60.253	60.508	58.251	55.69	57.915	56.686	55.072	56.882	55.597	53.327	54.757	52.423	54.14
26	102.197	99.804	96.165	98.185	96.493	99.473	94.235	96.002	92.869	93.401	99.657	100.836	62.637	65.848	65.079	62.43	62.38	60.407	62.959	60.473	60.599	62.581	61.148	59.786	61.417	58.995	55.102	57.562	55.844	53.982	56.779	56.6	54.207	54.992	53.519	53.652
27	103.952	101.429	98.762	99.654	100.399	100.554	97.586	97.271	94.79	95.722	102.953	102.459	63.412	66.239	67.63	64.629	64.389	61.893	62.091	62.813	60.86	63.455	62.434	61.031	61.264	59.44	57.501	58.086	57.935	55.838	59.024	58.433	55.538	55.332	54.36	55.418
28	104.428	101.666	100.54	100.704	98.45	99.179	97.972	98.999	96.315	97.827	102.655	105.193	64.493	67.784	66.065	65.356	62.349	62.089	63.222	62.974	64.017	64.512	62.591	60.721	62.797	57.995	56.79	56.855	57.371	56.737	68.412	57.631	54.494	56.707	52.918	55.056
29	108.049	103.977	101.914	101.771	101.584	102.758	100.807	100.564	101.101	98.818	105.283	105.749	66.248	69.494	66.289	66.373	68.009	63.239	67.555	66.592	65.656	66.67	63.461	60.591	63.286	61.415	59.329	59.775	58.276	56.876	59.066	57.277	54.354	56.681	54.627	54.031
30	108.914	106.733	103.126	102.57	103.962	103.468	102.385	102.025	99.962	99.457	108.232	107.98	67.725	67.456	67.588	66.017	68.396	64.499	66.371	66.516	65.61	66.46	64.795	60.529	63.203	59.066	59.456	59.672	59.076	57.918	60.197	59.538	55.108	56.765	54.352	56.184
31	108.126	108.401	104.797	106.358	105.405	106.753	102.249	103.94	101.219	99.475	109.288	108.687	67.022	70.287	68.221	68.94	67.495	66.237	68.118	66.444	66.888	68.778	63.981	62.55	63.45	62.961	61.553	58.178	57.967	58.04	59.331	58.099	56.552	57.953	54.99	56.497
32	111.17	109.8	105.165	105.425	107.982	107.466	107.065	106.249	103.862	103.644	108.38	109.787	69.105	69.952	70.374	68.801	67.391	68.005	67.901	68.131	66.021	70.032	65.405	61.666	64.842	61.829	60.892	60.115	59.973	58.439	60.431	59.142	56.837	57.599	54.758	55.804
33	111.887	109.926	108.854	108.706	110.362	110.499	105.91	106.484	102.327	101.991	110.514	109.696	69.318	71.896	72.138	68.412	68.407	66.595	67.101	67.074	64.656	67.867	67.263	60.967	65.957	62.171	60.522	60.554	59.954	59.113	64.428	59.252	57.622	58.226	55.203	55.805
34	115.628	113.229	110.335	111.362	108.449	112.396	109.396	108.873	106.788	105.179	110.291	113.048	68.777	72.705	70.457	70.484	70.974	71.394	70.919	70.38	69.323	68.356	66.836	65.529	64.344	63.211	60.86	61.222	59.165	60.766	61.573	60.549	58.27	59.305	56.868	58.641
35	113.363	113.728	109.419	108.728	110.35	110.88	107.933	106.029	106.739	105.693	112.569	112.361	68.727	74.446	73	70.335	71.197	69.031	71.085	68.459	68.926	67.701	67.531	68.056	65.747	63.174	60.26	61.525	59.155	59.964	61.348	60.726	58.073	58.62	57.058	57.294
36	116.016	114.151	110.07	111.824	108.131	110.889	112.098	109.254	106.201	105.851	112.832	114.669	70.5	73.673	73.363	66.523	71.385	68.088	71.469	69.365	69.983	69.338	68.814	65.27	66.413	64.38	61.319	60.811	60.592	59.011	60.12	59.782	59.33	58.944	55.705	57.554
37	115.462	116.096	112.537	113.11	113.476	114.16	112.18	107.706	108.305	108.369	115.285	112.836	70.926	74.704	72.037	71.267	70.704	72.118	70.365	71.909	71.532	70.03	68.246	66.357	66.13	64.111	62.865	61.888	60.79	60.129	63.162	62.368	57.42	59.083	56.285	59.201
38	117.143	115.275	113.171	112.401	114.159	113.333	112.034	110.65	108.061	107.437	117.116	116.235	73.571	74.696	75.598	71.914	71.599	70.865	72.239	74.835	68.976	70.257	69.456	66.528	66.603	63.883	61.437	63.582	61.622	59.887	67.321	60.803	59.047	58.784	56.908	58.441
39	118.898	117.054	114.052	114.437	114.247	114.783	114.426	109.508	109.741	109.568	118.245	115.165	70.712	74.037	75.287	71.771	72.353	72.023	73.773	72.512	71.13	69.211	68.793	65.637	67.232	64.723	61.988	61.509	61.457	60.496	62.623	61.506	59.4	60.876	59.468	59.276
40	119.646	120.088	115.407	118.51	116.458	117.321	114.749	114.615	113.428	110.365	117.249	118.377	72.042	76.808	74.717	75.133	73.867	73.487	74.899	72.853	71.61	71.262	70.223	68.774	68.591	66.269	64.272	65.047	61.808	62.153	65.784	63.521	60.105	60.778	58.243	60.271
41	121.1	120.413	117.419	117.498	117.413	118.282	114.284	114.929	114.228	112.309	121.107	116.757	74.373	75.38	77.787	73.238	74.092	73.665	73.363	75.484	70.931	70.603	71.808	68.876	67.526	66.964	62.925	63.887	63.456	60.904	65.21	64.296	59.041	60.4	57.599	60.225
42	121.691	124.311	116.196	116.907	119.28	121.107	119.304	114.692	113.241	113.417	121.79	117.897	73.623	78.001	75.342	73.568	73.705	76.379	76.732	74.375	72.9	71.491	70.938	69.994	67.989	66.009	63.503	64.887	63.326	62.101	65.352	63.307	60.891	61.1	58.852	58.761
43	123.378	123.572	120.857	118.209	119.224	121.197	117.178	117.03	115.737	113.635	122.816	120.94	74.323	77.11	76.303	75.411	74.985	75.453	75	75.745	77.641	73.556	70.612	69.712	68.788	66.796	65.776	65.294	62.46	63.548	64.251	63.739	58.964	62.284	60.081	60.738
44	120.58	121.45	119.392	119.424	119.069	119.369	118.065	114.97	116.271	112.104	121.862	117.764	72.776	76.728	75.385	76.363	74.388	77.173	74.438	77.032	75.761	76.285	70.503	67.939	69.552	65.156	64.92	64.405	63.212	63.643	64.881	63.196	59.659	62.274	60.852	60.356
45	123.29	123.087	121.225	120.047	119.497	120.295	121.471	117.541	116.797	114.057	118.922	120.158	72.467	79.004	75.226	77.81	75.871	75.78	74.624	74.641	74.043	74.157	72.675	69.417	69.201	67.737	65.054	66.301	63.619	62.246	63.549	63.244	59.449	61.567	58.674	60.387
46	125.106	124.404	122.611	123.525	122.809	121.828	122.812	118.276	117.35	113.915	122.413	119.529	73.752	78.249	79.038	76.577	75.423	75.955	75.49	75.993	72.856	72.868	74.299	68.393	70.256	67.149	63.994	66.174	64.882	64.564	65.146	66.034	59.24	62.23	58.4	61.221
47	127.246	125.268	124.326	121.911	124.626	126.217	125.015	120.832	117.66	116.513	123.474	121.941	75.159	80.947	79.354	78.535	78.278	77.826	75.791	77.25	75.22	76.59	74.63	70.432	71.425	67.889	65.148	65.897	65.349	64.211	66.133	64.652	60.763	62.458	60.27	61.064
48	126.603	126.577	126.376	123.739	123.592	124.573	124.162	120.652	118.426	116.405	123.799	120.343	75.689	82.466	80.47	78.928	78.213	77.551	76.093	76.674	74.18	77.003	72.385	68.648	71.159	68.344	66.209	67.454	66.245	64.737	68.689	64.929	62.779	62.777	59.79	60.12
49	127.744	127.293	124.307	124.761	127.446	125.483	123.938	123.005	119.328	119.379	125.166	121.463	75.652	79.777	80.412	79.831	79.196	76.428	77.36	76.455	76.05	76.489	73.88	71.23	71.671	69.38	64.688	66.814	66.84	65.452	70.977	64.832	61.997	64.117	60.13	61.337
50	128.276	132.959	124.151	125.415	125.054	125.585	125.715	121.923	121.632	120.937	125.081	122.953	73.844	79.03	79.404	81.738	76.502	78.014	78.241	78.641	77.315	75.936	73.913	71.635	71.553	68.751	64.642	67.408	65.18	64.02	65.576	65.517	62.626	63.682	60.792	62.584
51	129.403	130.487	125.986	125.908	127.149	126.084	127.864	122.184	123.152	123.342	127.156	123.155	75.48	82.322	79.635	81.743	79.456	80.467	77.982	78.814	76.879	76.992	74.555	72.295	74.744	70.229	67.573	67.926	65.803	66.131	67.123	66.878	63.482	64.918	61.309	60.68
52	132.075	131.295	125.658	129.462	126.856	127.447	127.918	121.99	122.705	121.826	129.539	123.376	75.041	80.813	81.753	80.859	79.441	80.368	78.255	76.166	77.742	77.041	75.319	70.26	72.805	70.504	65.986	69.223	66.95	65.667	66.822	65.719	63.945	63.662	61.897	62.646
53	131.469	130.984	126.592	127.115	127.315	128.034	127.066	122.049	122.866	121.011	128.283	123.015	75.522	79.504	79.444	80.969	77.951	78.891	77.936	78.367	75.086	76.068	74.39	70.594	73.459	70.014	67.144	67.874	66.902	66.493	67.39	66.374	62.869	63.559	61.989	62.347
54	133.054	133.027	128.012	129.621	129.752	127.706	129.595	127.45	123.047	123.987	127.539	121.995	74.657	80.568	81.996	81.92	78.695	79.164	79.491	78.568	76.083	76.312	74.045	69.645	73.359	70.119	67.092	66.805	67.183	65.726	67.929	65.522	62.615	63.586	61.024	61.071
55	131.595	134.594	130.889	129.966	130.761	130.389	131.841	127.273	126.015	122.605	130.985	126.226	75.232	84.838	81.928	84.517	81.87	80.933	79.01	79.747	79.948	78.592	73.647	70.765	74.894	71.422	66.769	70.299	66.963	67.432	67.609	68.715	63.685	65.018	62.601	62.591
56	133.101	137.219	129.156	130.011	129.839	128.953	129.059	125.524	126.993	124.506	130.071	124.911	77.705	82.938	79.522	80.609	80.326	82.188	79.744	80.138	77.336	76.358	73.617	71.034	73.772	70.372	66.989	68.429	67.162	67.629	68.568	67.471	64.079	65.042	62.382	62.368
57	132.216	136.883	131.026	131.127	130.477	131.457	133.968	125.825	127.686	124.761	130.777	125.996	77.405	83.667	81.555	81.407	80.361	82.12	81.009	80.938	79.451	78.249	74.44	73.097	76.38	71.298	68.78	69.208	66.594	66.948	70.905	67.403	65.371	64.321	63.363	62.76
58	133.937	137.605	133.112	130.736	132.095	130.991	133.92	125.977	128.165	124.339	131.571	128.661	77.464	83.421	80.047	84.309	80.544	80.788	79.549	78.467	79.498	78.345	75.409	75.879	76.216	71.651	67.524	68.719	66.963	67.355	69.286	69.291	64.096	66.751	63.211	63.154
59	135.491	137.244	131.772	132.221	132.923	132.442	135.065	129.999	127.621	126.517	133.442	126.782	77.983	81.796	78.991	84.758	81.964	82.379	80.56	80.246	81.042	78.335	73.841	76.283	73.783	72.713	67.989	69.067	67.131	66.768	69.897	67.52	65.39	65.648	63.258	62.742
60	134.983	136.208	133.469	130.727	131.825	131.993	134.303	127.258	127.082	125.082	133.799	126.562	76.692	81.682	79.995	83.839	79.678	80.707	79.052	79.395	77.471	78.232	73.53	73.376	76.473	70.775	68.491	69.192	68.765	66.791	70.281	67.402	64.318	65.039	62.847	62.737
