# Supplementary material for: Biosensor-integrated transposon mutagenesis reveals rv0158 as a coordinator of redox homeostasis in Mycobacterium tuberculosis
Source: eLife. 2023 Aug 29;12:e80218. doi: 10.7554/eLife.80218 (PMC10501769; doi:10.7554/eLife.80218)
Supplement: Figure 7—figure supplement 1—source data 1. [file elife-80218-fig7-figsupp1-data1.xlsx]

## Sheet: Sheet 1
		Wild Type H37Rv			Δrv0158			rv0158 COMP			mshA KO
0		10000000	3.53553e+06	4	8750000	3.53553e+06	4	11666667	5.16398e+06	4	12500000	6.45497e+06	4
2		23333333	5.16398e+06	4	9166667	3.76386e+06	4	33333333	10408330	4	8000000	2.73861e+06	4
4		124000000	15478480	4	61000000	8.21584e+06	4	90000000	10000000	4	33333333	2.88675e+06	4
6		400000000	147196014	4	110000000	41833001	4	417000000	76376262	4	91666667	52041650	4
8		688000000	193110504	4	333000000	104083300	4	638000000	47871355	4	250000000	108012345	4
10		733000000	160727513	4	533000000	28867513	4	650000000	50000000	4	317000000	104083300	4
		mean
