# Supplementary material for: Biosensor-integrated transposon mutagenesis reveals rv0158 as a coordinator of redox homeostasis in Mycobacterium tuberculosis
Source: eLife. 2023 Aug 29;12:e80218. doi: 10.7554/eLife.80218 (PMC10501769; doi:10.7554/eLife.80218)
Supplement: Figure 7—source data 1. [file elife-80218-fig7-data1.xlsx]

## Sheet: Figure 7A
	Wildtype H37Rv				rv0158 KO				rv0158 Comp
1	0.035	0.05			0.049	0.039			0.076	0.075
3	0.402	0.5			0.103	0.083			0.287	0.238
5	1.105	1.465			0.344	0.461			1.196	0.94
7	2.54	2.525			0.91	1.024			2.12	1.855
9	2.865	2.785			2.05	1.83			2.89	2.7
11	2.925	3.08			2.875	2.635			2.645	2.66
13					3.08	3.04			2.79	2.695

## Sheet: Figure 7B
	Wildtype H37Rv				rv0158 KO				rv0158 Comp
0	0.05				0.05				0.05			Replicate 1
3	0.35				0.35				0.18
5	0.61				0.56				0.41
6	0.56				0.51				0.42
7	0.62				0.5				0.44
10	0.48				0.42				0.4
12	0.46				0.48				0.36
14	0.34				0.38				0.32
16
0	0.1				0.1				0.1			Plotted Data
2	0.234				0.228				0.237
4	0.535				0.533				0.425
6	0.737				0.7				0.554
8	0.82				0.72				0.65
14	0.66				0.5				0.78

## Sheet: Figure 7C
	Wildtype H37Rv						rv0158 KO						rv0158 Comp												rv0158 Comp
0	0.075						0.075						0.075
2	0.103	0.106	0.107	0.108	0.091	0.093	0.101	0.1	0.101	0.097	0.098	0.096	0.113	0.107	0.106	0.109	0.116	0.112
3	0.12	0.121	0.123	0.125	0.123	0.123	0.134	0.139	0.143	0.15	0.151	0.153	0.119	0.124	0.12	0.121	0.118	0.119
5	0.19	0.187	0.185	0.182	0.179	0.176	0.202	0.199	0.196	0.195	0.205	0.204	0.168	0.165	0.163	0.16	0.16	0.159
6	0.153	0.163	0.162	0.163	0.164	0.165	0.218	0.217	0.216	0.215	0.213	0.219	0.153	0.156	0.158	0.159	0.162	0.161
7	0.158	0.15	0.148	0.185	0.184	0.186	0.246	0.249	0.236	0.24	0.241	0.241	0.149	0.151	0.15	0.148	0.149	0.146
10	0.176	0.16	0.173	0.17	0.169	0.179	0.33	0.332	0.331	0.333	0.345	0.34	0.181	0.171	0.17	0.169	0.167	0.168
12	0.154	0.16	0.159	0.156	0.161	0.169	0.398	0.417	0.42	0.417	0.414	0.408	0.137	0.136	0.138	0.136	0.134	0.135
14	0.184	0.179	0.177	0.167	0.165	0.167	0.519	0.524	0.523	0.514	0.508	0.467	0.149	0.14	0.137	0.158	0.161	0.16

## Sheet: Figure 7D
	wtrv				korv0158				rv0158 comp
0	0.1				0.1				0.1
2	0.198	0.197	0.199	0.19	0.206	0.21	0.211	0.22	0.136	0.135	0.135	0.14
4	0.43	0.43	0.43	0.432	0.382	0.386	0.39	0.39	0.268	0.27	0.268	0.27
6	0.458	0.452	0.454	0.454	0.536	0.538	0.542	0.544	0.458	0.458	0.464	0.462
8	0.772	0.776	0.778	0.762	0.97	0.942	0.946	0.952	0.782	0.788	0.79	0.79
10	0.634	0.65	0.654	0.654	0.774	0.78	0.78	0.788	0.776	0.734	0.726	0.724
12	0.818	0.81	0.802	0.804	0.772	0.78	0.774	0.768	0.836	0.852	0.86	0.842

## Sheet: Figure 7E
	WT Mtb		rv0158 KO		rv0158 Comp
0	0.1		0.1		0.1
2	0.341		0.317		0.324
4	0.372		0.409		0.38
6	0.378		0.388		0.39
8	0.385		0.415		0.39
14	0.58		0.605		0.51

## Sheet: Figure 7F
	WT Mtb				rv0158 KO				rv0158 Comp
0.2% glucose	-282.758	-281.881	-275.633	-277.153		-264.617	-262.77	-263.99	-276.526	-274.965	-278.47	-279.548
0.2% acetate	-296.14	-295.51	-295.76		-305.35	-303.33	-304.35		-300.16	-302.08	-298.37
0.2% propionate	-305.9	-306.05	-304.19		-306.63	-305.4	-305.06		-299.23	-299.7	-299.5
0.02% cholesterol	-286.57	-282.96	-285.74		-282.98	-281.95	-282.07		-287.02	-286.71	-285.95
