# Supplementary material for: Biosensor-integrated transposon mutagenesis reveals rv0158 as a coordinator of redox homeostasis in Mycobacterium tuberculosis
Source: eLife. 2023 Aug 29;12:e80218. doi: 10.7554/eLife.80218 (PMC10501769; doi:10.7554/eLife.80218)
Supplement: Figure 8—source data 1. [file elife-80218-fig8-data1.xlsx]

## Sheet: Figure 8A
Time (minutes)	COMP					H37Rv					RV0158 KO
1.59032	100.365	103.977				96.0976	96.573	85.877	93.58		97.1582	99.8226	93.6856	91.8237
8.18095	101.801	99.0385				96.4612	99.4816	93.234	98.412		100.856	101.703	96.779	97.1672
14.7722	100	100				100	100	100	100		100	100	100	100
21.979	159.25	169.077				169.348	196.935	194.88	195.49		140.346	149.769	136.321	154.278
29.1092	171.495	186.778				185.082	213.285	204.7	221.79		144.354	153.331	148.339	166.729
36.2369	181.684	205.399				204.541	232.221	211.67	244.06		156.025	163.319	156.609	175.503
42.9168	495.048	376.3				474.528	495.438	475.8	495.18		283.603	200.42	383.459	338.393
49.5142	492.962	396.795				456.896	487.656	481.54	440.39		276.348	206.67	361.022	334.296
56.1154	474.563	382.825				430.022	468.436	473.98	372.97		271.974	204.036	311.555	297.679

## Sheet: Figure 8B
Time (minutes)	Rv0158 KO				H37Rv				COMP
1.58902	106.348		104.141	102.883	107.837	105.388		104.556	104.889	105.783	104.006	105.801
8.18714	99.319		98.5996	98.0522	100.671	99.8127		97.9889	98.7577	98.744	99.3223	98.9533
14.7818	100		100	100	100	100		100	100	100	100	100
21.9932	250.485		199.978	249.898	251.555	275.221		245.697	250.049	239.087	254.626	249.546
29.1281	280.862		213.793	263.805	303.422	337.569		279.917	290.06	278.902	280.584	275.535
36.2591	306.881		228.783	281.384	347.185	389.638		315.976	322.891	307.866	309.084	305.399
42.9443	635.001		489.78	683.904	590.326	599.145		463.138	634.428	741.63	505.097	481.826
49.5458	581.477		419.359	586.961	567.966	570.457		434.359	626.843	711.149	472.841	458.419
56.1477	525.423		396.455	566.488	517.57	539.717		392.459	596.166	670.732	452.331	440.608

## Sheet: Figure 8C
Time (minutes)	COMP		H37Rv		RV0158 KO
1.59032	108.155	110.545	119.318	114.193	102.744	103.955
8.18095	100.745	101.946	103.308	100.067	98.2902	98.9982
14.7722	100	100	100	100	100	100
21.979	130.055	142.236	128.709	141.619	162.799	163.089
29.1092	123.527	134.881	119.554	138.772	157.034	155.582
36.2369	121.937	133.649	130.356	143.383	158.322	158.243
42.9168	181.092	273.441	259.402	235.878	381.909	365.837
49.5142	192.243	282.276	252.525	239.318	378.363	375.778
56.1154	184.727	251	217.711	209.309	336.696	353.86

## Sheet: Figure 8D
Time (minutes)	COMP			H37Rv			RV0158 KO
1.59032	105.75	110.061		102.954	110.924		109.622	100.414
8.18095	104.382	103.743		98.1823	109.231		102.954	101.921
14.7722	100	100		100	100		100	100
21.979	270.217	302.106		311.32	329.715		171.235	184.236
29.1092	231.185	272.032		307.026	306.541		158.958	181.686
36.2369	210.421	259.579		308.04	288.079		164.658	186.722
42.9168	671.531	911.303		987.908	923.87		532.583	321.385
49.5142	557.346	722.959		807.101	730.131		491.77	316.623
56.1154	443.724	581.547		618.927	569.869		457.871	302.083

## Sheet: Figure 8E
Time (minutes)	Rv0158 KO		H37Rv		COMP
1.58902	92.0768	93.5356	100.252	95.2415	100.149	93.7238
8.18714	95.4105	96.7068	97.7245	98.6667	104.602	103.043
14.7818	100	100	100	100	100	100
21.9932	183.339	188.701	160.173	164.213	207.886	200.39
29.1281	162.328	172.56	158.78	161.563	197.035	191.293
36.2591	149.592	159.037	145.349	149.468	170.471	165.854
42.9443	553.498	554.974	592.4	562.794	548.25	701.019
49.5458	466.873	488.335	495.871	463.853	445.075	583.443
56.1477	420.248	450.78	411.968	424.835	436.645	588.572

## Sheet: Figure 8F
Time (minutes)	COMP		H37Rv		RV0158 KO
1.59032	110.914	106.5	45.2674	107.416	110.673	113.404
8.18095	102.301	101.172	66.8396	98.8958	102.708	103.494
14.7722	100	100	100	100	100	100
21.979	190.164	188.395	155.884	181.666	213.68	229.042
29.1092	158.849	153.995	135.273	158.596	187.638	200.898
36.2369	147.409	143.387	165.949	145.714	176.805	187.097
42.9168	286.159	344.675	142.943	278.415	454.744	448.95
49.5142	268.343	319.705	113.505	251.019	402.638	428.14
56.1154	231.221	272.189	136.044	197.047	344.884	377.303
