# Supplementary material for: Biosensor-integrated transposon mutagenesis reveals rv0158 as a coordinator of redox homeostasis in Mycobacterium tuberculosis
Source: eLife. 2023 Aug 29;12:e80218. doi: 10.7554/eLife.80218 (PMC10501769; doi:10.7554/eLife.80218)
Supplement: Figure 10—figure supplement 1—source data 2. [file elife-80218-fig10-figsupp1-data2.xls]

## Sheet: Curves
	Rv0158
ml	mAu
0	0.006
0.149932	-0.003
0.299864	-0.018
0.449797	-0.02
0.599729	-0.015
0.749661	-0.037
0.899593	-0.036
1.04953	-0.045
1.19946	-0.063
1.34939	-0.06
1.49932	-0.049
1.64925	-0.075
1.79919	-0.083
1.94912	-0.095
2.09905	-0.091
2.24898	-0.092
2.39892	-0.107
2.54885	-0.121
2.69878	-0.12
2.84871	-0.13
2.99864	-0.125
3.14858	-0.136
3.29851	-0.139
3.44844	-0.141
3.59837	-0.155
3.74831	-0.161
3.89824	-0.198
4.04817	-0.204
4.1981	-0.215
4.34803	-0.241
4.49797	-0.247
4.6479	-0.271
4.79783	-0.288
4.94776	-0.303
5.0977	-0.333
5.24763	-0.347
5.39756	-0.356
5.54749	-0.373
5.69742	-0.398
5.84736	-0.429
5.99729	-0.447
6.14722	-0.472
6.29715	-0.49
6.44708	-0.509
6.59702	-0.524
6.74695	-0.531
6.89688	-0.554
7.04681	-0.56
7.19675	-0.527
7.34668	-0.499
7.49661	-0.468
7.64654	-0.446
7.79647	-0.426
7.94641	-0.432
8.09634	-0.403
8.24627	-0.407
8.3962	-0.4
8.54614	-0.391
8.69607	-0.389
8.846	-0.379
8.99593	-0.363
9.14586	-0.368
9.2958	-0.363
9.44573	-0.369
9.59566	-0.338
9.74559	-0.356
9.89553	-0.348
10.0455	-0.348
10.1954	-0.35
10.3453	-0.337
10.4953	-0.333
10.6452	-0.352
10.7951	-0.369
10.9451	-0.385
11.095	-0.401
11.2449	-0.445
11.3948	-0.449
11.5448	-0.468
11.6947	-0.494
11.8446	-0.521
11.9946	-0.541
12.1445	-0.566
12.2944	-0.578
12.4444	-0.617
12.5943	-0.641
12.7442	-0.647
12.8942	-0.657
13.0441	-0.688
13.194	-0.711
13.344	-0.717
13.4939	-0.748
13.6438	-0.69
13.7938	-0.63
13.9437	-0.591
14.0936	-0.534
14.2436	-0.49
14.3935	-0.49
14.5434	-0.459
14.6934	-0.437
14.8433	-0.437
14.9932	-0.42
15.1432	-0.395
15.2931	-0.4
15.443	-0.4
15.5929	-0.409
15.7429	-0.401
15.8928	-0.412
16.0427	-0.408
16.1927	-0.419
16.3426	-0.395
16.4925	-0.393
16.6425	-0.373
16.7924	-0.387
16.9423	-0.378
17.0923	-0.408
17.2422	-0.414
17.3921	-0.435
17.5421	-0.45
17.692	-0.479
17.8419	-0.504
17.9919	-0.544
18.1418	-0.523
18.2917	-0.569
18.4417	-0.588
18.5916	-0.607
18.7415	-0.624
18.8915	-0.644
19.0414	-0.68
19.1913	-0.686
19.3413	-0.7
19.4912	-0.721
19.6411	-0.78
19.7911	-0.805
19.941	-0.835
20.0909	-0.722
20.2408	-0.664
20.3908	-0.604
20.5407	-0.567
20.6906	-0.509
20.8406	-0.48
20.9905	-0.453
21.1404	-0.446
21.2904	-0.407
21.4403	-0.402
21.5902	-0.387
21.7402	-0.379
21.8901	-0.378
22.04	-0.373
22.19	-0.374
22.3399	-0.387
22.4898	-0.368
22.6398	-0.369
22.7897	-0.365
22.9396	-0.357
23.0896	-0.342
23.2395	-0.355
23.3894	-0.385
23.5394	-0.4
23.6893	-0.406
23.8392	-0.437
23.9892	-0.45
24.1391	-0.494
24.289	-0.502
24.4389	-0.54
24.5889	-0.571
24.7388	-0.585
24.8887	-0.609
25.0387	-0.644
25.1886	-0.685
25.3385	-0.701
25.4885	-0.744
25.6384	-0.793
25.7883	-0.85
25.9383	-0.845
26.0882	-0.906
26.2381	-0.878
26.3881	-0.776
26.538	-0.704
26.6879	-0.669
26.8379	-0.61
26.9878	-0.594
27.1377	-0.57
27.2877	-0.55
27.4376	-0.509
27.5875	-0.489
27.7375	-0.468
27.8874	-0.438
28.0373	-0.381
28.1873	-0.346
28.3372	-0.289
28.4871	-0.262
28.6371	-0.195
28.787	-0.151
28.9369	-0.12
29.0868	-0.101
29.2368	-0.1
29.3867	-0.093
29.5366	-0.089
29.6866	-0.116
29.8365	-0.134
29.9864	-0.131
30.1364	-0.159
30.2863	-0.183
30.4362	-0.206
30.5862	-0.216
30.7361	-0.235
30.886	-0.24
31.036	-0.252
31.1859	-0.244
31.3358	-0.258
31.4858	-0.262
31.6357	-0.277
31.7856	-0.297
31.9356	-0.313
32.0855	-0.283
32.2354	-0.21
32.3854	-0.15
32.5353	-0.109
32.6852	-0.091
32.8352	-0.079
32.9851	-0.068
33.135	-0.077
33.285	-0.067
33.4349	-0.098
33.5848	-0.098
33.7347	-0.086
33.8847	-0.101
34.0346	-0.11
34.1845	-0.113
34.3345	-0.135
34.4844	-0.121
34.6343	-0.11
34.7843	-0.105
34.9342	-0.095
35.0841	-0.107
35.2341	-0.093
35.384	-0.144
35.5339	-0.156
35.6839	-0.214
35.8338	-0.245
35.9837	-0.269
36.1337	-0.31
36.2836	-0.36
36.4335	-0.42
36.5835	-0.446
36.7334	-0.502
36.8833	-0.551
37.0333	-0.584
37.1832	-0.632
37.3331	-0.678
37.4831	-0.729
37.633	-0.79
37.7829	-0.823
37.9328	-0.903
38.0828	-0.967
38.2327	-0.981
38.3826	-0.904
38.5326	-0.828
38.6825	-0.819
38.8324	-0.769
38.9824	-0.743
39.1323	-0.721
39.2822	-0.712
39.4322	-0.706
39.5821	-0.707
39.732	-0.708
39.882	-0.701
40.0319	-0.699
40.1818	-0.715
40.3318	-0.715
40.4817	-0.718
40.6316	-0.728
40.7816	-0.727
40.9315	-0.707
41.0814	-0.707
41.2314	-0.687
41.3813	-0.685
41.5312	-0.682
41.6812	-0.705
41.8311	-0.721
41.981	-0.738
42.131	-0.722
42.2809	-0.732
42.4308	-0.712
42.5807	-0.698
42.7307	-0.67
42.8806	-0.627
43.0305	-0.548
43.1805	-0.454
43.3304	-0.315
43.4803	-0.136
43.6303	0.106
43.7802	0.468
43.9301	0.891
44.0801	1.47
44.23	2.236
44.3799	3.255
44.5299	4.529
44.6798	5.933
44.8297	7.461
44.9797	9.085
45.1296	10.809
45.2795	12.581
45.4295	14.434
45.5794	16.262
45.7293	18.115
45.8793	19.903
46.0292	21.705
46.1791	23.397
46.3291	24.997
46.479	26.502
46.6289	27.936
46.7788	29.261
46.9288	30.498
47.0787	31.584
47.2286	32.533
47.3786	33.307
47.5285	33.87
47.6784	34.244
47.8284	34.409
47.9783	34.432
48.1282	34.253
48.2782	33.947
48.4281	33.509
48.578	33.04
48.728	32.485
48.8779	31.898
49.0278	31.322
49.1778	30.778
49.3277	30.32
49.4776	29.892
49.6276	29.515
49.7775	29.176
49.9274	28.867
50.0774	28.706
50.2273	28.576
50.3772	28.717
50.5272	28.965
50.6771	29.501
50.827	30.006
50.977	30.781
51.1269	31.388
51.2768	32.24
51.4267	33.02
51.5767	34.003
51.7266	35.214
51.8765	36.582
52.0265	38.484
52.1764	40.451
52.3263	43.155
52.4763	46.079
52.6262	50.318
52.7761	54.923
52.9261	61.048
53.076	67.626
53.2259	75.914
53.3759	84.987
53.5258	95.573
53.6757	107.123
53.8257	119.828
53.9756	132.248
54.1255	145.543
54.2755	157.883
54.4254	169.978
54.5753	180.859
54.7253	191.288
54.8752	201.262
55.0251	211.189
55.1751	221.62
55.325	231.968
55.4749	242.861
55.6248	253.149
55.7748	263.297
55.9247	272.134
56.0746	280.177
56.2246	286.803
56.3745	291.984
56.5244	296.015
56.6744	298.226
56.8243	299.522
56.9742	298.779
57.1242	297.316
57.2741	294.028
57.424	290.301
57.574	285.117
57.7239	279.793
57.8738	273.403
58.0238	266.855
58.1737	259.864
58.3236	252.62
58.4736	245.157
58.6235	237.594
58.7734	230.091
58.9234	222.671
59.0733	215.424
59.2232	208.084
59.3732	200.863
59.5231	193.484
59.673	185.79
59.823	178.297
59.9729	171.134
60.1228	163.779
60.2727	156.62
60.4227	149.688
60.5726	142.941
60.7225	136.478
60.8725	129.994
61.0224	123.742
61.1723	118.338
61.3223	112.526
61.4722	107.747
61.6221	102.344
61.7721	98.193
61.922	93.208
62.0719	89.504
62.2219	85
62.3718	81.86
62.5217	78.116
62.6717	75.347
62.8216	72.014
62.9715	69.227
63.1215	66.207
63.2714	63.47
63.4213	60.77
63.5713	58.121
63.7212	55.605
63.8711	53.104
64.0211	50.77
64.171	48.383
64.3209	46.108
64.4708	43.825
64.6208	41.784
64.7707	39.767
64.9206	37.86
65.0706	36.034
65.2205	34.2
65.3704	32.547
65.5204	30.835
65.6703	29.224
65.8202	27.739
65.9702	26.21
66.1201	24.897
66.27	23.503
66.42	22.375
66.5699	21.058
66.7198	20.078
66.8698	18.874
67.0197	18.029
67.1696	16.908
67.3196	16.12
67.4695	15.116
67.6194	14.338
67.7694	13.454
67.9193	12.824
68.0692	12.163
68.2192	11.651
68.3691	11.099
68.519	10.568
68.669	10.052
68.8189	9.546
68.9688	9.071
69.1187	8.57
69.2687	8.11
69.4186	7.64
69.5685	7.212
69.7185	6.819
69.8684	6.437
70.0183	6.079
70.1683	5.735
70.3182	5.418
70.4681	5.136
70.6181	4.826
70.768	4.524
70.9179	4.226
71.0679	3.971
71.2178	3.685
71.3677	3.456
71.5177	3.2
71.6676	3.009
71.8175	2.784
71.9675	2.621
72.1174	2.407
72.2673	2.256
72.4173	2.071
72.5672	1.94
72.7171	1.782
72.8671	1.648
73.017	1.511
73.1669	1.367
73.3168	1.236
73.4668	1.155
73.6167	1.147
73.7666	1.162
73.9166	1.161
74.0665	1.145
74.2164	1.134
74.3664	1.112
74.5163	1.071
74.6662	1.048
74.8162	1.016
74.9661	0.987
75.116	0.983
75.266	0.943
75.4159	0.904
75.5658	0.846
75.7158	0.828
75.8657	0.805
76.0156	0.782
76.1656	0.745
76.3155	0.727
76.4654	0.706
76.6154	0.693
76.7653	0.642
76.9152	0.599
77.0652	0.552
77.2151	0.532
77.365	0.476
77.515	0.447
77.6649	0.399
77.8148	0.384
77.9647	0.334
78.1147	0.298
78.2646	0.264
78.4145	0.255
78.5645	0.23
78.7144	0.163
78.8643	0.147
79.0143	0.1
79.1642	0.037
79.3141	0.031
79.4641	0.076
79.614	0.182
79.7639	0.231
79.9139	0.288
80.0638	0.327
80.2137	0.369
80.3637	0.401
80.5136	0.421
80.6635	0.461
80.8135	0.471
80.9634	0.501
81.1133	0.504
81.2633	0.522
81.4132	0.505
81.5631	0.533
81.7131	0.556
81.863	0.58
82.0129	0.583
82.1628	0.633
82.3128	0.638
82.4627	0.673
82.6126	0.677
82.7626	0.687
82.9125	0.695
83.0624	0.705
83.2124	0.717
83.3623	0.726
83.5122	0.761
83.6622	0.776
83.8121	0.8
83.962	0.827
84.112	0.825
84.2619	0.874
84.4118	0.88
84.5618	0.897
84.7117	0.916
84.8616	0.916
85.0116	0.904
85.1615	0.949
85.3114	0.951
85.4614	1.052
85.6113	1.188
85.7612	1.258
85.9112	1.351
86.0611	1.426
86.211	1.492
86.361	1.539
86.5109	1.596
86.6608	1.642
86.8107	1.68
86.9607	1.72
87.1106	1.757
87.2605	1.762
87.4105	1.783
87.5604	1.792
87.7103	1.82
87.8603	1.841
88.0102	1.859
88.1601	1.886
88.3101	1.891
88.46	1.893
88.6099	1.884
88.7599	1.882
88.9098	1.856
89.0597	1.841
89.2097	1.821
89.3596	1.817
89.5095	1.806
89.6595	1.793
89.8094	1.775
89.9593	1.752
90.1093	1.746
90.2592	1.724
90.4091	1.707
90.5591	1.664
90.709	1.661
90.8589	1.645
91.0088	1.612
91.1588	1.568
91.3087	1.626
91.4586	1.711
91.6086	1.806
91.7585	1.859
91.9084	1.93
92.0584	1.992
92.2083	2.016
92.3582	2.054
92.5082	2.062
92.6581	2.11
92.808	2.12
92.958	2.152
93.1079	2.159
93.2578	2.17
93.4078	2.177
93.5577	2.182
93.7076	2.2
93.8576	2.223
94.0075	2.252
94.1574	2.253
94.3074	2.251
94.4573	2.256
94.6072	2.234
94.7572	2.223
94.9071	2.207
95.057	2.193
95.207	2.18
95.3569	2.17
95.5068	2.157
95.6567	2.129
95.8067	2.125
95.9566	2.1
96.1065	2.104
96.2565	2.065
96.4064	2.034
96.5563	2.03
96.7063	2.012
96.8562	1.959
97.0061	1.955
97.1561	1.999
97.306	2.105
97.4559	2.191
97.6059	2.239
97.7558	2.31
97.9057	2.353
98.0557	2.399
98.2056	2.423
98.3555	2.456
98.5055	2.464
98.6554	2.47
98.8053	2.494
98.9553	2.507
99.1052	2.529
99.2551	2.525
99.4051	2.543
99.555	2.548
99.7049	2.56
99.8549	2.585
100.005	2.589
100.155	2.582
100.305	2.565
100.455	2.556
100.605	2.526
100.754	2.5
100.904	2.494
101.054	2.475
101.204	2.425
101.354	2.408
101.504	2.399
101.654	2.383
101.804	2.351
101.954	2.337
102.104	2.313
102.254	2.28
102.404	2.243
102.554	2.182
102.704	2.15
102.853	2.122
103.003	2.149
103.153	2.224
103.303	2.264
103.453	2.304
103.603	2.3
103.753	2.328
103.903	2.266
104.053	2.225
104.203	2.143
104.353	2.086
104.503	1.965
104.653	1.869
104.803	1.729
104.953	1.648
105.102	1.497
105.252	1.376
105.402	1.162
105.552	1.052
105.702	0.958
105.852	0.887
106.002	0.779
106.152	0.685
106.302	0.541
106.452	0.394
106.602	0.255
106.752	0.084
106.902	-0.08
107.052	-0.245
107.202	-0.43
107.351	-0.611
107.501	-0.783
107.651	-0.945
107.801	-1.09
107.951	-1.237
108.101	-1.361
108.251	-1.457
108.401	-1.574
108.551	-1.671
108.701	-1.754
108.851	-1.849
109.001	-1.916
109.151	-1.971
109.301	-1.994
109.451	-2.011
109.6	-2.004
109.75	-1.963
109.9	-1.882
110.05	-1.819
110.2	-1.705
110.35	-1.594
110.5	-1.442
110.65	-1.294
110.8	-1.145
110.95	-0.962
111.1	-0.758
111.25	-0.572
111.4	-0.354
111.55	-0.08
111.699	0.235
111.849	0.575
111.999	0.948
112.149	1.301
112.299	1.656
112.449	2.009
112.599	2.37
112.749	2.699
112.899	3.053
113.049	3.369
113.199	3.691
113.349	3.969
113.499	4.264
113.649	4.537
113.799	4.793
113.948	5.029
114.098	5.255
114.248	5.484
114.398	5.721
114.548	5.975
114.698	6.32
114.848	6.692
114.998	7.125
115.148	7.568
115.298	8.008
115.448	8.43
115.598	8.848
115.748	9.26
115.898	9.637
116.048	9.988
116.197	10.325
116.347	10.627
116.497	10.875
116.647	11.105
116.797	11.254
116.947	11.364
117.097	11.402
117.247	11.398
117.397	11.379
117.547	11.349
117.697	11.308
117.847	11.246
117.997	11.13
118.147	10.998
118.297	10.861
118.446	10.682
118.596	10.488
118.746	10.308
118.896	10.112
119.046	9.9
119.196	9.683
119.346	9.454
119.496	9.242
119.646	9.047
119.796	8.824
119.946	8.625
120.096	8.404
120.246	8.203
120.396	8.005
120.545	7.76
120.695	7.563
120.845	7.346
120.995	7.131
121.145	6.923
121.295	6.729
121.445	6.519
121.595	6.333
121.745	6.176
121.895	5.989
122.045	5.836
122.195	5.683
122.345	5.541
122.495	5.437
122.645	5.307
122.794	5.203
122.944	5.105
123.094	5.038
123.244	5.031
123.394	5.083
123.544	5.144
123.694	5.192
123.844	5.238
123.994	5.289
124.144	5.472
124.294	5.572
124.444	9.98
124.594	8.22
124.744	7.391
124.894	7.122
125.043	6.972
125.193	6.849
125.343	6.744
125.493	6.684
125.643	6.673
125.793	6.619
125.943	6.569
126.093	6.487
126.243	6.435
126.393	6.329
126.543	6.25
126.693	6.159
126.843	6.056
126.993	5.942
127.143	5.863
127.292	5.757
127.442	5.641
127.592	5.516
127.742	5.414
127.892	5.295
128.042	5.168
128.192	5.036
128.342	4.895
128.492	4.768
128.642	4.633
128.792	4.501
128.942	4.38
129.092	4.254
129.242	4.142
129.391	4.024
129.541	3.916
129.691	3.786
129.841	3.69
129.991	3.585
130.141	3.49
130.291	3.409
130.441	3.306
130.591	3.227
130.741	3.165
130.891	3.153
131.041	3.142
131.191	3.143
131.341	3.128
131.491	3.112
131.64	3.106
131.79	3.078
131.94	3.064
132.09	3.051
132.24	2.996
132.39	2.986
132.54	2.95
132.69	2.951
132.84	2.938
132.99	2.906
133.14	2.886
133.29	2.876
133.44	2.875
133.59	2.868
133.74	2.861
133.889	2.851
134.039	2.838
134.189	2.816
134.339	2.807
134.489	2.781
134.639	2.76
134.789	2.755
134.939	2.73
