# Supplementary material for: Biosensor-integrated transposon mutagenesis reveals rv0158 as a coordinator of redox homeostasis in Mycobacterium tuberculosis
Source: eLife. 2023 Aug 29;12:e80218. doi: 10.7554/eLife.80218 (PMC10501769; doi:10.7554/eLife.80218)
Supplement: Figure 10—source data 1. [file elife-80218-fig10-data1.xlsx]

## Sheet: Figure 10A, 10B
	rv0158 KO Glucose			rv0158Comp Glucose			rv0158 KO Propionate			rv0158Comp Propionate
icl1		3.44622	3.15962		1.09407	1.28404		5.20179	5.34424		0.918676	0.927319
prpR		3.29369	2.70766		2.25965	1.24974		11.5956	7.80939		1.71812	1.30584
prpC		4.01291	3.12869		1.66691	1.73199		12.5384	11.8384		0.987118	0.925629
prpD		5.15355	5.29487		1.72328	2.12467		7.7431	11.4135		0.918672	0.962303
fadB2		1.0906	0.949562		0.656749	0.670926		5.5052	5.51578		0.892363	1.07695

## Sheet: Figure 10D, 10E
	rv0158 KO Glucose				rv0158 Comp Glucose				rv0158 KO Propionate				rv0158Comp Propionate
ppsE	2.06675	1.55234			1.79861	2.00683			9.52489	18.8494				2.55898	3.601
drrA	2.03377	1.40667			1.12019	1.89998			24.1587	32.0747				2.81648	3.11038
drrC	1.3363	0.964006			1.49867	1.42323			9.84067	12.5856				1.77526	1.69048
papA5	1.33878	1.03617			1.21549	1.39454			3.62686	4.83272				1.72861	2.17455
pks1	1.68859	0.92304			1.55644	1.32132			3.56073	3.05027				0.758018	0.5821
fadD22	1.23324	1.00704			1.2907	1.5753			3.93361	5.11993				0.827789	0.695615
