# Supplementary material for: Biosensor-integrated transposon mutagenesis reveals rv0158 as a coordinator of redox homeostasis in Mycobacterium tuberculosis
Source: eLife. 2023 Aug 29;12:e80218. doi: 10.7554/eLife.80218 (PMC10501769; doi:10.7554/eLife.80218)
Supplement: Figure 12—figure supplement 1—source data 1. [file elife-80218-fig12-figsupp1-data1.xlsx]

## Sheet: Figure 1a
	WT Mtb				rv0158 KO				rv0158 Comp
Input	10000000	9500000	13500000		11000000	13500000	17000000		5500000	4500000	5500000
UT	17000000	12500000	18500000	18000000	32500000	23000000	14500000	10500000	29500000	24000000	15500000	16500000
H2O2 5mM	65000	75000	115000	70000	70000	120000	50000	100000	380000	555000	275000	605000
H2O2 10mM	0	0	0	0	0	0	0	0	50	250	200	150

## Sheet: Figure 1b
	WT Mtb				Rv0158 KO				rv0158 Comp
Input	7000000	7500000	7000000		10500000	11500000	8500000		1500000	900000	1450000
UT	2000000	3000000	3500000	6000000	9500000	15500000	37500000	3750000	11500000	16000000	13000000	2150000
H2O2 5mM	2720000	2350000	2105000	1145000	150000	150000	175000	95000	160000	210000	50000	79000
H2O2 10mM	0	0	0	0	1300		3350	1000	50	0	150	0

## Sheet: Figure 1c
	WT Mtb				Rv0158 KO				rv0158 Comp
Input	11500000	12500000	12500000		22000000	15000000	22000000		3350000	3800000	4050000
UT	17500000	13000000	21500000	16500000	13500000	18000000	13000000	20000000	11000000	9000000	7500000	23500000
H2O2 5mM	940000	760000	690000	815000	2230000	1915000	1635000	2205000	295000	405000
H2O2 10mM	550	650	750	500	2350	2800	2200	30500	250	250	400	500
