# Supplementary material for: Biosensor-integrated transposon mutagenesis reveals rv0158 as a coordinator of redox homeostasis in Mycobacterium tuberculosis
Source: eLife. 2023 Aug 29;12:e80218. doi: 10.7554/eLife.80218 (PMC10501769; doi:10.7554/eLife.80218)
Supplement: Figure 12—figure supplement 2—source data 1. [file elife-80218-fig12-figsupp2-data1.xlsx]

## Sheet: Figure 2a
WT Mtb						rv0158 KO						rv0158 Comp
5906.08	6022.54	6386.86	6270.45			6329.44	6208	6023.01	5680.5			6093.08	6045.72	5958.86	5881.79

## Sheet: Figure 2b
	WT Mtb				rv0158 KO				rv0158 Comp
0.25			84.8191	87.73	87.7681	88.2805			73.1733	71.0287
0.125			82.9132	85.2901	86.3745	88.6044			71.1428	68.6121
0.0625			71.1186	76.6502	83.8185	83.9963			60.3403	57.6418
0.03125			-12.5351	-16.4423	64.056	65.5925			35.9088	31.6581
0.015625			-0.26344	-2.67583	-3.37934	-6.23162			-6.11327	-4.26585

## Sheet: Figure 2c
	WT Mtb				rv0158 KO				rv0158 Comp
0.125	99.0984	98.8827	98.8459	98.7959	98.8119	98.7005	98.8757	99.2499	98.5298	98.8551	98.7592	98.9257
0.0625	98.5619	98.4906	98.4283	98.4081	98.4015	98.4277	98.4813	98.5599	73.3885	79.5198	98.4016	98.5029
0.03125	98.361	98.2531	98.0736	98.2067	98.0769	97.1651	97.0642	97.4259	94.6027	96.4576	95.9975	96.6836
0.01563	96.1753	96.8783	96.9976	95.8838	96.5398	97.3175	97.5225	97.1727	28.9558	74.9369	79.0143	82.9753
0.00781	85.7367	83.5594	90.8462	83.4853	91.2897	94.6195	95.2115	95.1311	33.2838	38.7025	26.6667	24.7235
0.00391	35.2786	42.8532	21.7069	38.1974	87.2393	84.3535	89.2452	86.8741	9.4002	8.78298	9.01243	9.62831
0.00195	9.55196	7.76832	9.03922	8.81946	8.39229	9.87947	7.12683	12.4082	8.1161	9.30443	9.10928	8.89365

## Sheet: Figure 2d
	WT Mtb				rv0158 KO				rv0158 Comp
0.5	98.5637	98.3953	98.5659	98.6267	98.3756	98.4343	98.4353	98.432	98.377	98.4886	98.3668	98.4219
0.25	98.5606	98.4451	98.5638	98.5524	98.273	98.182	98.3915	98.3141	98.208	98.312	98.2163	98.2721
0.125	98.2925	98.2244	98.3106	98.3092	98.0013	97.9882	98.4513	98.1276	97.7453	97.8453	97.72	97.8219
0.0625	43.0272	70.088	57.8254	59.2795	96.6822	96.0473	96.9749	96.9325	75.5118	76.7863	60.8262	60.0208
0.03125	9.57373	7.67891	11.379	9.20722	80.5502	71.9978	84.2151	77.1993	9.43899	8.5687	7.67568	7.50752
0.01563	9.36422	7.83581	11.4673	9.6	23.5906	11.5108	34.5763	13.3709	7.88746	8.7299	7.29299	7.2557
0.00781	8.62472	8.53996	10.3841	9.66508	13.8961	10.1139	12.8448	11.7283	8.46014	8.01764	6.60761	7.05973

## Sheet: Figure 2e
	WT Mtb				rv0158 KO				rv0158 Comp
0.25	97	98	97.935		97.9002	97.8074	97.8253	97.7715	97.741	97.5993	97.6392	97.6749
0.125	97.904	97.7783	97.6891		97.6054	97.6568	97.4949	97.5007	97.5873	97.3739	97.4912	97.3998
0.0625	96.6342	96.4221	97.2037		97.0323	96.945	96.6184	96.7296	96.027	96.6785	95.9564	96.4648
0.03125	61	88	94.9413		95.9773	96.2262	96.0963	95.6504	91.6913	92.5	93.8519	94.2196
0.01563	12.8474	20.4314	56.0097		93.5791	93.6126	93.5581	88.9642	13.403	20.3453	35.7118	47.328
0.00781	1.61858	1.02108	-0.02582		69.5787	75.2444	72.0055	65.5577	-4.3203	-3.98893	1.09582	-2.57982
0.0039	-1.55776	5.53595	-1.0511		0.70822	5.64268	-4.1749	-2.17621	-2.29113	3.02373	-0.75788	0.02528
