# Supplementary material for: Biosensor-integrated transposon mutagenesis reveals rv0158 as a coordinator of redox homeostasis in Mycobacterium tuberculosis
Source: eLife. 2023 Aug 29;12:e80218. doi: 10.7554/eLife.80218 (PMC10501769; doi:10.7554/eLife.80218)
Supplement: Figure 12—source data 1. [file elife-80218-fig12-data1.xlsx]

## Sheet: Figure 12A
	WT Mtb						rv 0158 KO						rv0158 Comp
INPUT	5000000	5000000	8000000	9500000			6000000	8500000	9500000	6500000			7000000	7500000	6000000	8000000	7500000
H2O2 5mM	2950000	2900000	2250000	3650000			25000	10000	10000	20000			750000	700000	400000	450000
CHP100μM	1900000	2100000	3100000	2950000			650000	650000	350000	400000			1550000	1100000	1300000	800000
MND 0.5 mM	5000	10000	10000	5000			0	0	0	0			20000	10000	10000	10000
DETA NO 1.25mM	2100000	2800000	3100000	2600000			450000	850000	800000	750000			1750000	2400000	1800000	1650000

## Sheet: Figure 12B
	WT Mtb								rv 0158 KO								rv0158 Comp
UT	600000	700000	900000	500000	1000000	500000			500000	700000	900000	1000000	500000	1500000			800000	800000	700000	1000000	2000000
INH 1X	45000	60000	200000	150000					0	0	0	0					10000	5000	15000	20000
MOX 1X	150000	150000	140000	105000					10000	25000	55000	40000					350000	180000	215000	350000
BDQ 1X	80000	195000	400000	100000					40000	30000	25000	25000					600000	700000	400000	350000

## Sheet: Figure 12C
	EMSH-reduced						EMSH-basal						EMSH-oxidized
WT Mtb	36.84	46.85	47.46	57.71			44.75	34.41	32.37	27.3				18.41	18.74	20.17	14.99
rv0158 KO	13.36	10.56	36.23	35.68			39.48	35.05	17.89	17.46				47.16	54.39	45.88	46.87
rv0158 Comp	42.58	45.89	42.04	38.29			30.09	28.5	28.02	27.11				27.34	25.62	29.94	34.6

## Sheet: Figure 12D
	WT				KO				COMP
1	123.809	195.238	109.524		101.587	124.868	112.169	120.635	166.667	162.5	187.5	175
2	176.19	166.667	161.905	171.429	91.0053	124.868	107.936	105.82	145.833	262.5	183.333	162.5
4	109.524	157.143	119.048	228.571	55.0265	40.2116	31.746	0	95.8333	75	87.5	58.3333

## Sheet: Figure 12F
	wild type Mtb					KO rv0158					COMP
4 week	148271	111020	91153	59307		18722	56667	58296	67753		120821	40846	37223	132060
8 week	84634	27103	46640	45388		2431.7	9277.3	9050.8	2307.7		17662	13829	12871	59701

## Sheet: Figure 12G
	wild type Mtb						KO rv0158					COMP
4 week		590	500	2000	146.67		30	200	120	40		200	100	40	2500
8 week		605	220	170	293.33		20	20	0	0		120	80	40	30
