# Supplementary material for: Biosensor-integrated transposon mutagenesis reveals rv0158 as a coordinator of redox homeostasis in Mycobacterium tuberculosis
Source: eLife journal article supplement (doi:10.7554/elife.80218), 2023-08-29
Supplement: supp [file elife-80218-supp-v1.zip]

Experiment : 21Nov2016 Bac sorting  
Specimen : 22Nov  
Tube : TN lib  
Sort Layout : Sort Layout\_001  
Application : FACSDiva Version 8.0.1

## Sort Report

Report Date : 2016.11.22 at 16:40:29  
Device : 4 Tube  
User ID : Administrator  
Cytometer : FACS Aria III (P65828254001)

### Sort Settings

|             |           |                   |       |
|-------------|-----------|-------------------|-------|
| Sort Setup  | 70 micron | Precision         | Yield |
| Frequency   | 88.3      | Yield Mask        | 32    |
| Amplitude   | 4.5       | Purity Mask       | 0     |
| Phase       | 0.00      | Phase Mask        | 0     |
| Drop Delay  | 44.65     | Single Cell       | Off   |
| Attenuation | Off       | Plates Voltage    | 4,000 |
| Sweet Spot  | On        | Voltage Centering | 6     |
| First Drop  | 210       | Sheath Pressure   | 70.00 |
| Target Gap  | 6         |                   |       |

### Side Stream Voltage (%)

| Far Left | Left  | Right | Far Right |
|----------|-------|-------|-----------|
| 0.00     | 56.00 | 43.00 | 0.00      |

### Neighboring Drop Charge (%)

| 2nd   | 3rd  | 4th  |
|-------|------|------|
| 18.00 | 8.00 | 0.00 |

### Acquisition Counters

|                              |          |
|------------------------------|----------|
| Threshold Count              | 90050439 |
| Processed Events Count(evt)  | 89667398 |
| Electronic Aborts Count(evt) | 996883   |
| Sort Elapsed Time(hh:mm:ss)  | 02:11:57 |

### Sort Counters

|                       | Far Left | Left | Right | Far Right |
|-----------------------|----------|------|-------|-----------|
| Sort Rate(evt/s)      | NA       | 31   | 12    | NA        |
| Conflicts Count(evt)  | NA       | 0    | 0     | NA        |
| Conflicts Rate(evt/s) | NA       | 0    | 0     | NA        |
| Efficiency(%)         | NA       | 100  | 100   | NA        |

### Sort Layout

| Far Left | Left        | Right       | Far Right |
|----------|-------------|-------------|-----------|
|          | Ox : 246261 | Red : 99093 |           |
