# Supplementary material for: Biosensor-integrated transposon mutagenesis reveals rv0158 as a coordinator of redox homeostasis in Mycobacterium tuberculosis
Source: eLife journal article supplement (doi:10.7554/elife.80218), 2023-08-29
Supplement: supp [file elife-80218-supp-v1.zip]

# Batch Analysis Report

Run Date: 2/3/16 5:15 PM

Experiment: 03Feb2016 Bact Sorting

User ID: Administrator

Statistics Output: C:\Users\Admin\Desktop\03Feb2016 Bact Sorting-Batch\_Analysis\_03022016171529.csv

Worksheet PDF Output: C:\Users\Admin\Desktop\03Feb2016 Bact Sorting-Batch\_Analysis\_03022016171529.pdf

## Specimen\_001

| Tube            | Status | Run Time       |
|-----------------|--------|----------------|
| RV US           | OK     | 2/3/16 5:15 PM |
| RV Mrx1         | OK     | 2/3/16 5:15 PM |
| RV Mrx1_001     | OK     | 2/3/16 5:15 PM |
| RV Mrx1 CHP     | OK     | 2/3/16 5:15 PM |
| RV Mrx1 CHP_001 | OK     | 2/3/16 5:15 PM |
| RV Mrx1 DTT     | OK     | 2/3/16 5:15 PM |
| RV Mrx1 DTT_001 | OK     | 2/3/16 5:15 PM |
| TN 40K          | OK     | 2/3/16 5:15 PM |
| TN 40K_001      | OK     | 2/3/16 5:15 PM |
| post sort       | OK     | 2/3/16 5:15 PM |

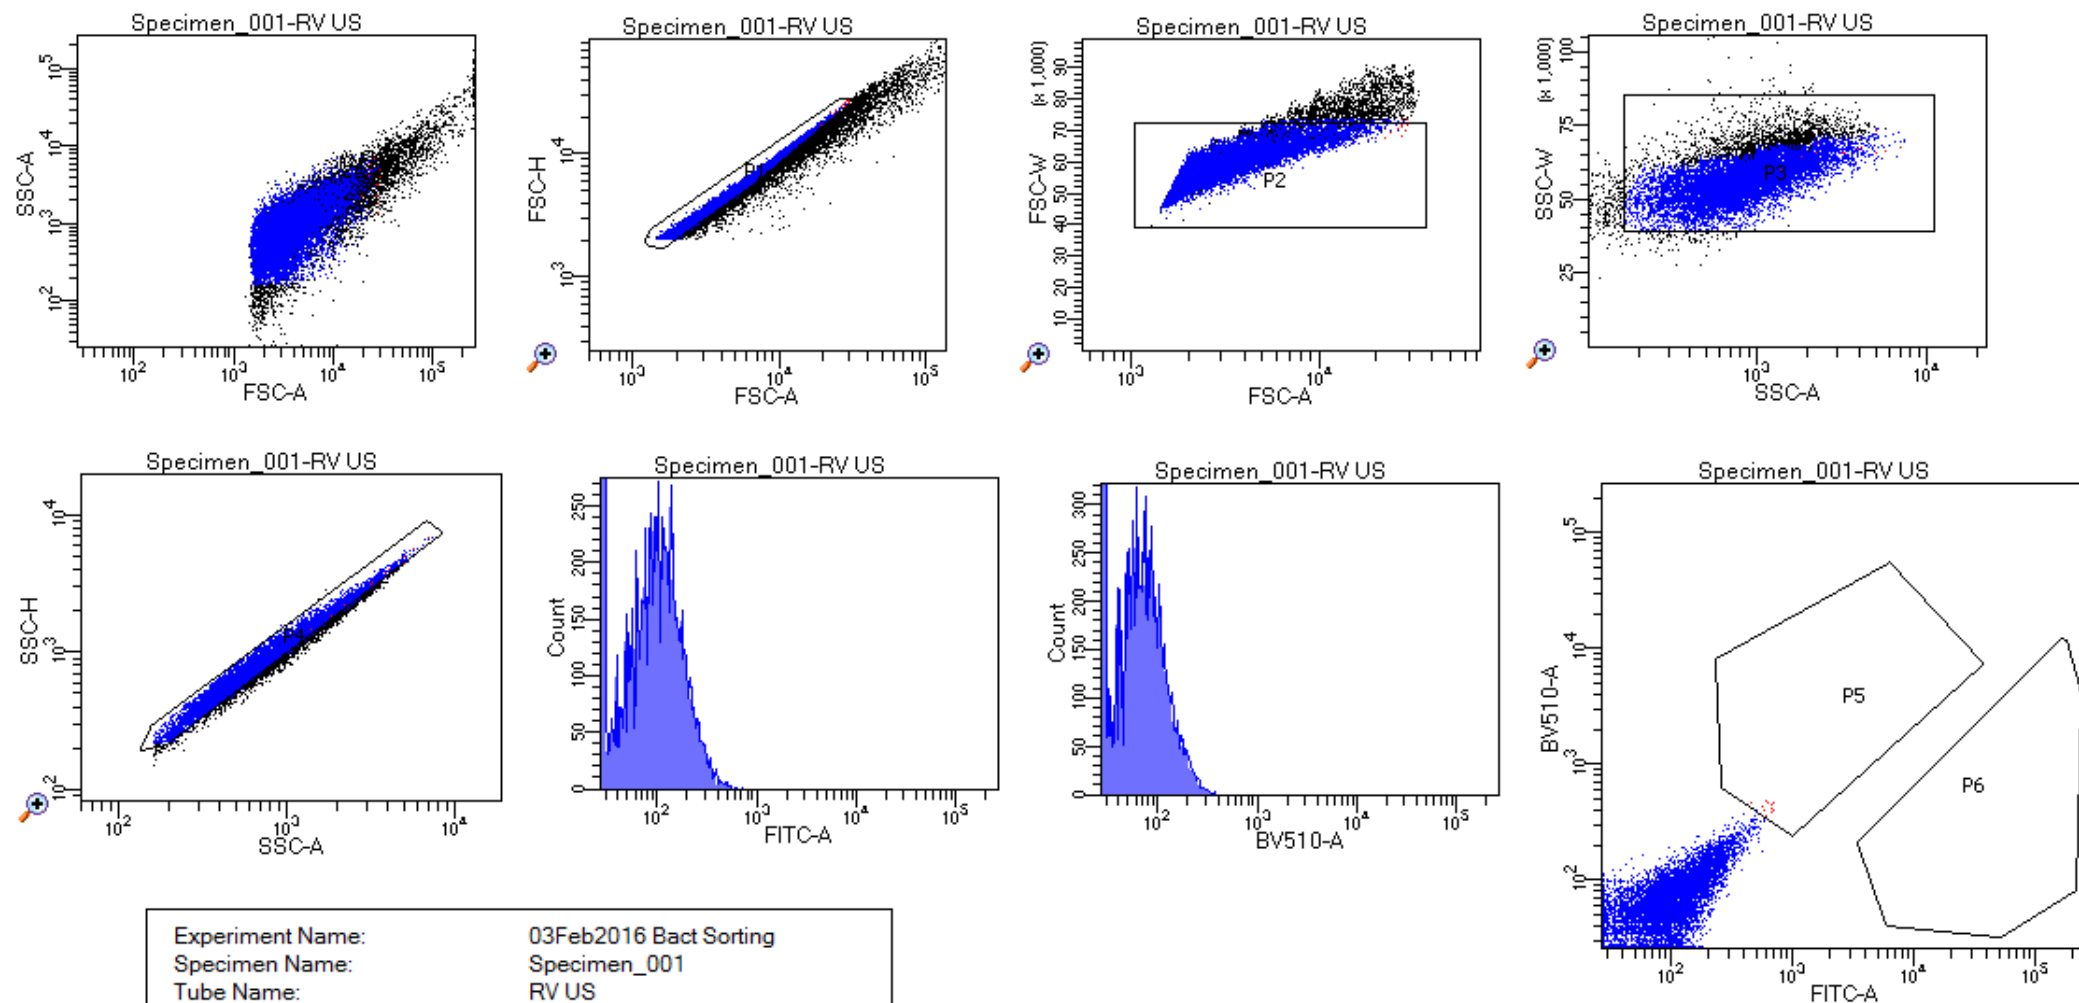

Experiment Name: 03Feb2016 Bact Sorting  
 Specimen Name: Specimen\_001  
 Tube Name: RV US  
 Record Date: Feb 3, 2016 3:19:31 PM  
 SOP: Administrator  
 GUID: 5525787f-e853-42cc-836d-07a...

| Population | #Events | %Parent | FITC-A<br>Median | BV510-A<br>Median |
|------------|---------|---------|------------------|-------------------|
| All Events | 16,022  | ####    | 117              | 80                |
| P1         | 12,827  | 80.1    | 102              | 71                |
| P2         | 11,478  | 89.5    | 93               | 65                |
| P3         | 11,003  | 95.9    | 94               | 67                |
| P4         | 9,432   | 85.7    | 89               | 62                |
| P5         | 12      | 0.1     | 602              | 420               |
| P6         | 0       | 0.0     | ####             | ####              |

Tube: RV US

| Population | #Events | %Parent | %Total |
|------------|---------|---------|--------|
| All Events | 16,022  | ####    | 100.0  |
| P1         | 12,827  | 80.1    | 80.1   |
| P2         | 11,478  | 89.5    | 71.6   |
| P3         | 11,003  | 95.9    | 68.7   |
| P4         | 9,432   | 85.7    | 58.9   |
| P5         | 12      | 0.1     | 0.1    |
| P6         | 0       | 0.0     | 0.0    |



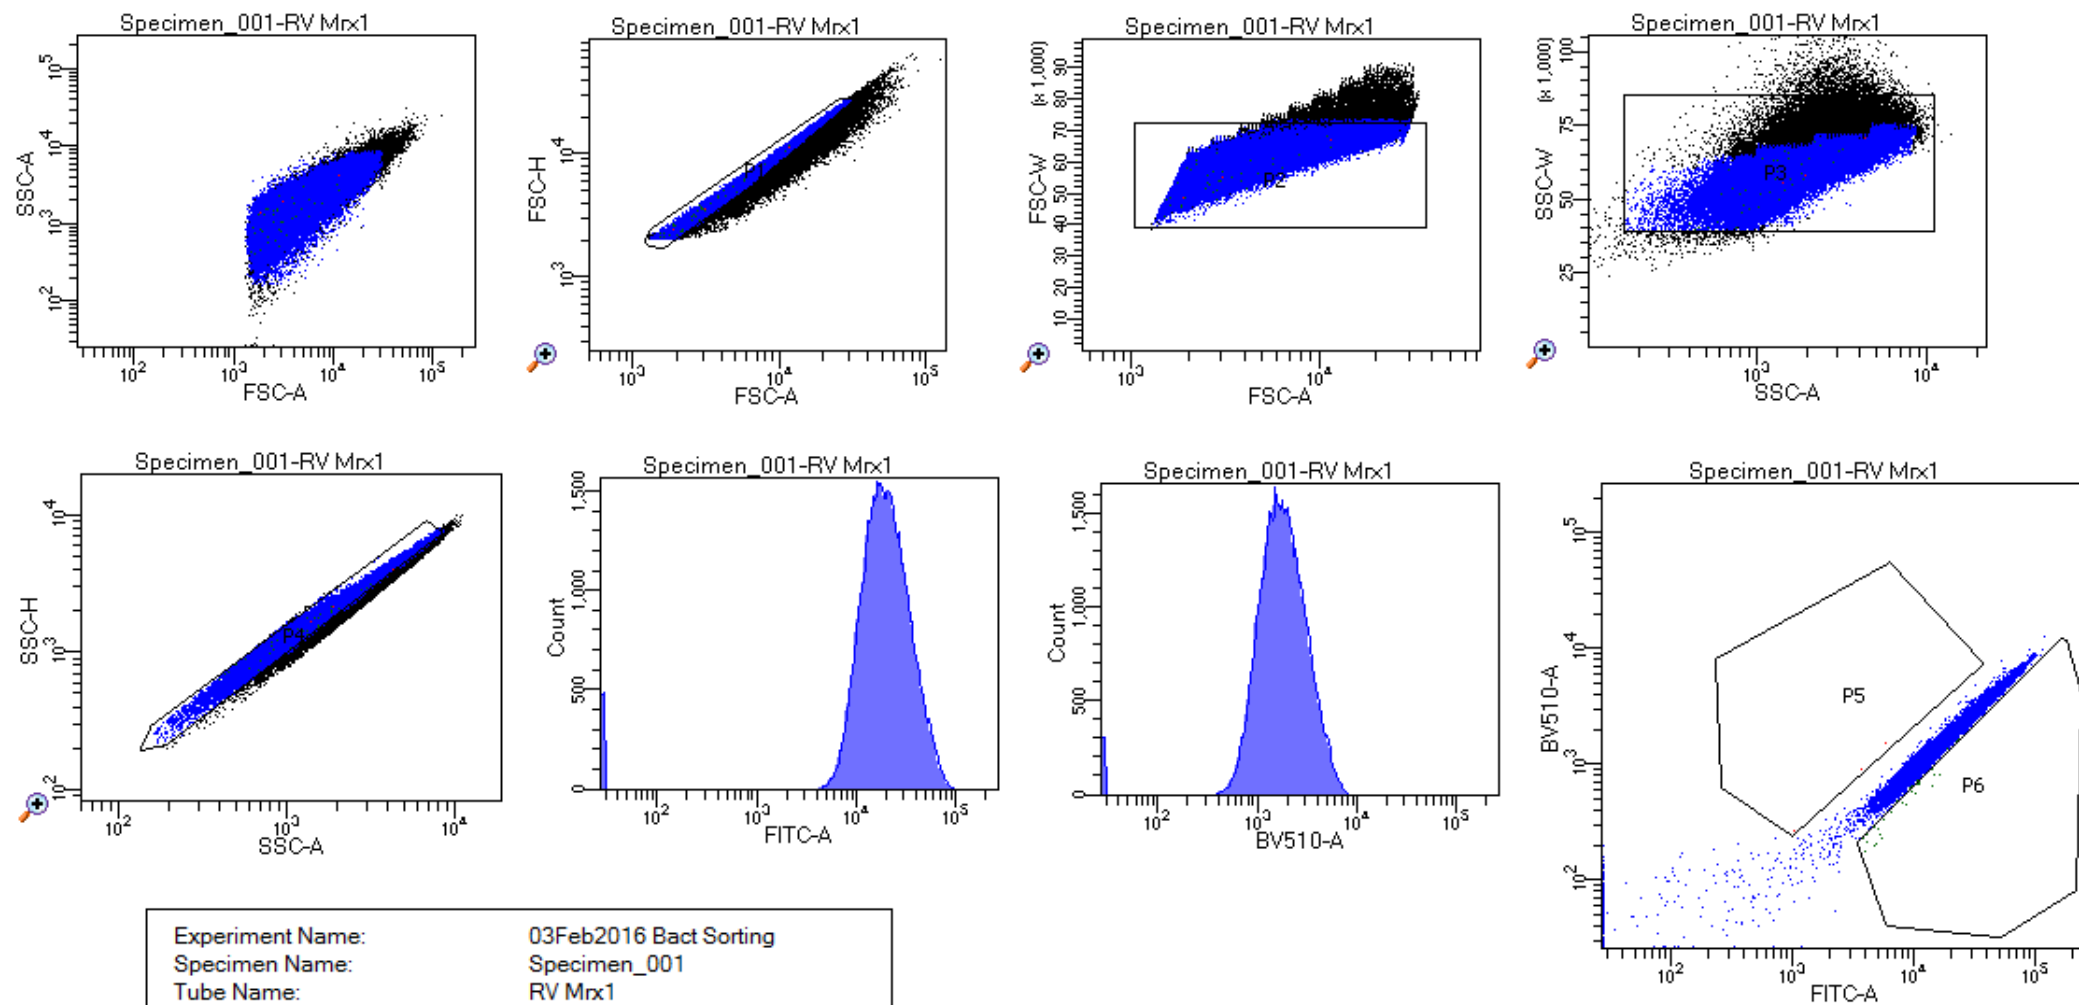

Experiment Name: 03Feb2016 Bact Sorting  
 Specimen Name: Specimen\_001  
 Tube Name: RV Mrx1  
 Record Date: Feb 3, 2016 3:20:46 PM  
 SOP: Administrator  
 GUID: b862cdae-f1c2-437a-b30a-f205...

| Population | #Events | %Parent | FITC-A<br>Median | BV510-A<br>Median |
|------------|---------|---------|------------------|-------------------|
| All Events | 96,347  | ####    | 23,308           | 2,089             |
| P1         | 88,561  | 91.9    | 22,119           | 1,986             |
| P2         | 82,624  | 93.3    | 20,954           | 1,885             |
| P3         | 81,034  | 98.1    | 20,874           | 1,878             |
| P4         | 60,439  | 74.6    | 18,193           | 1,645             |
| P5         | 3       | 0.0     | 3,654            | 907               |
| P6         | 38      | 0.1     | 9,589            | 606               |

Tube: RV Mrx1

| Population | #Events | %Parent | %Total |
|------------|---------|---------|--------|
| All Events | 96,347  | ####    | 100.0  |
| P1         | 88,561  | 91.9    | 91.9   |
| P2         | 82,624  | 93.3    | 85.8   |
| P3         | 81,034  | 98.1    | 84.1   |
| P4         | 60,439  | 74.6    | 62.7   |
| P5         | 3       | 0.0     | 0.0    |
| P6         | 38      | 0.1     | 0.0    |



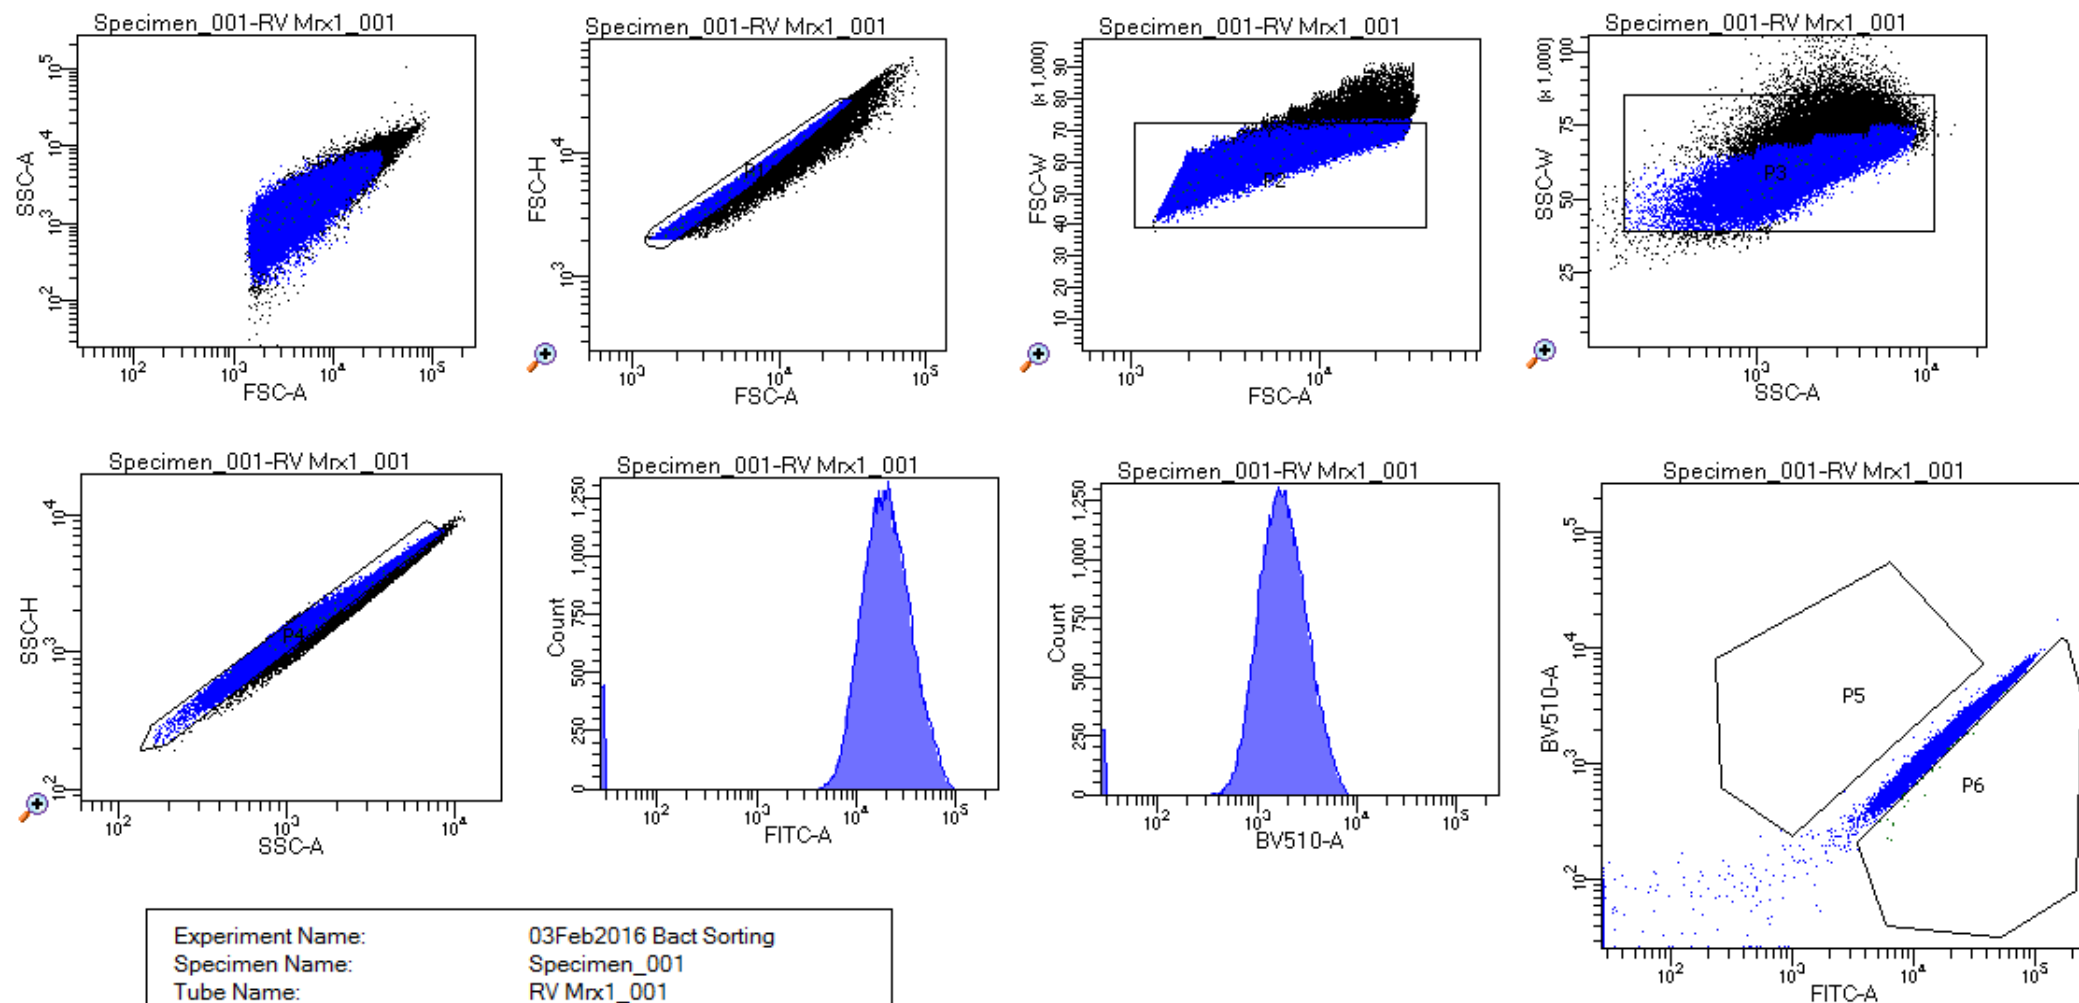

Experiment Name: 03Feb2016 Bact Sorting  
 Specimen Name: Specimen\_001  
 Tube Name: RV Mrx1\_001  
 Record Date: Feb 3, 2016 3:21:36 PM  
 SOP: Administrator  
 GUID: f1bcc585-3b64-4776-aea3-f632...

| Population | #Events | %Parent | FITC-A<br>Median | BV510-A<br>Median |
|------------|---------|---------|------------------|-------------------|
| All Events | 82,747  | ####    | 24,266           | 2,140             |
| P1         | 75,747  | 91.5    | 23,019           | 2,030             |
| P2         | 70,080  | 92.5    | 21,611           | 1,911             |
| P3         | 68,839  | 98.2    | 21,525           | 1,904             |
| P4         | 50,336  | 73.1    | 18,656           | 1,653             |
| P5         | 0       | 0.0     | ####             | ####              |
| P6         | 39      | 0.1     | 14,244           | 922               |

Tube: RV Mrx1\_001

| Population | #Events | %Parent | %Total |
|------------|---------|---------|--------|
| All Events | 82,747  | ####    | 100.0  |
| P1         | 75,747  | 91.5    | 91.5   |
| P2         | 70,080  | 92.5    | 84.7   |
| P3         | 68,839  | 98.2    | 83.2   |
| P4         | 50,336  | 73.1    | 60.8   |
| P5         | 0       | 0.0     | 0.0    |
| P6         | 39      | 0.1     | 0.0    |



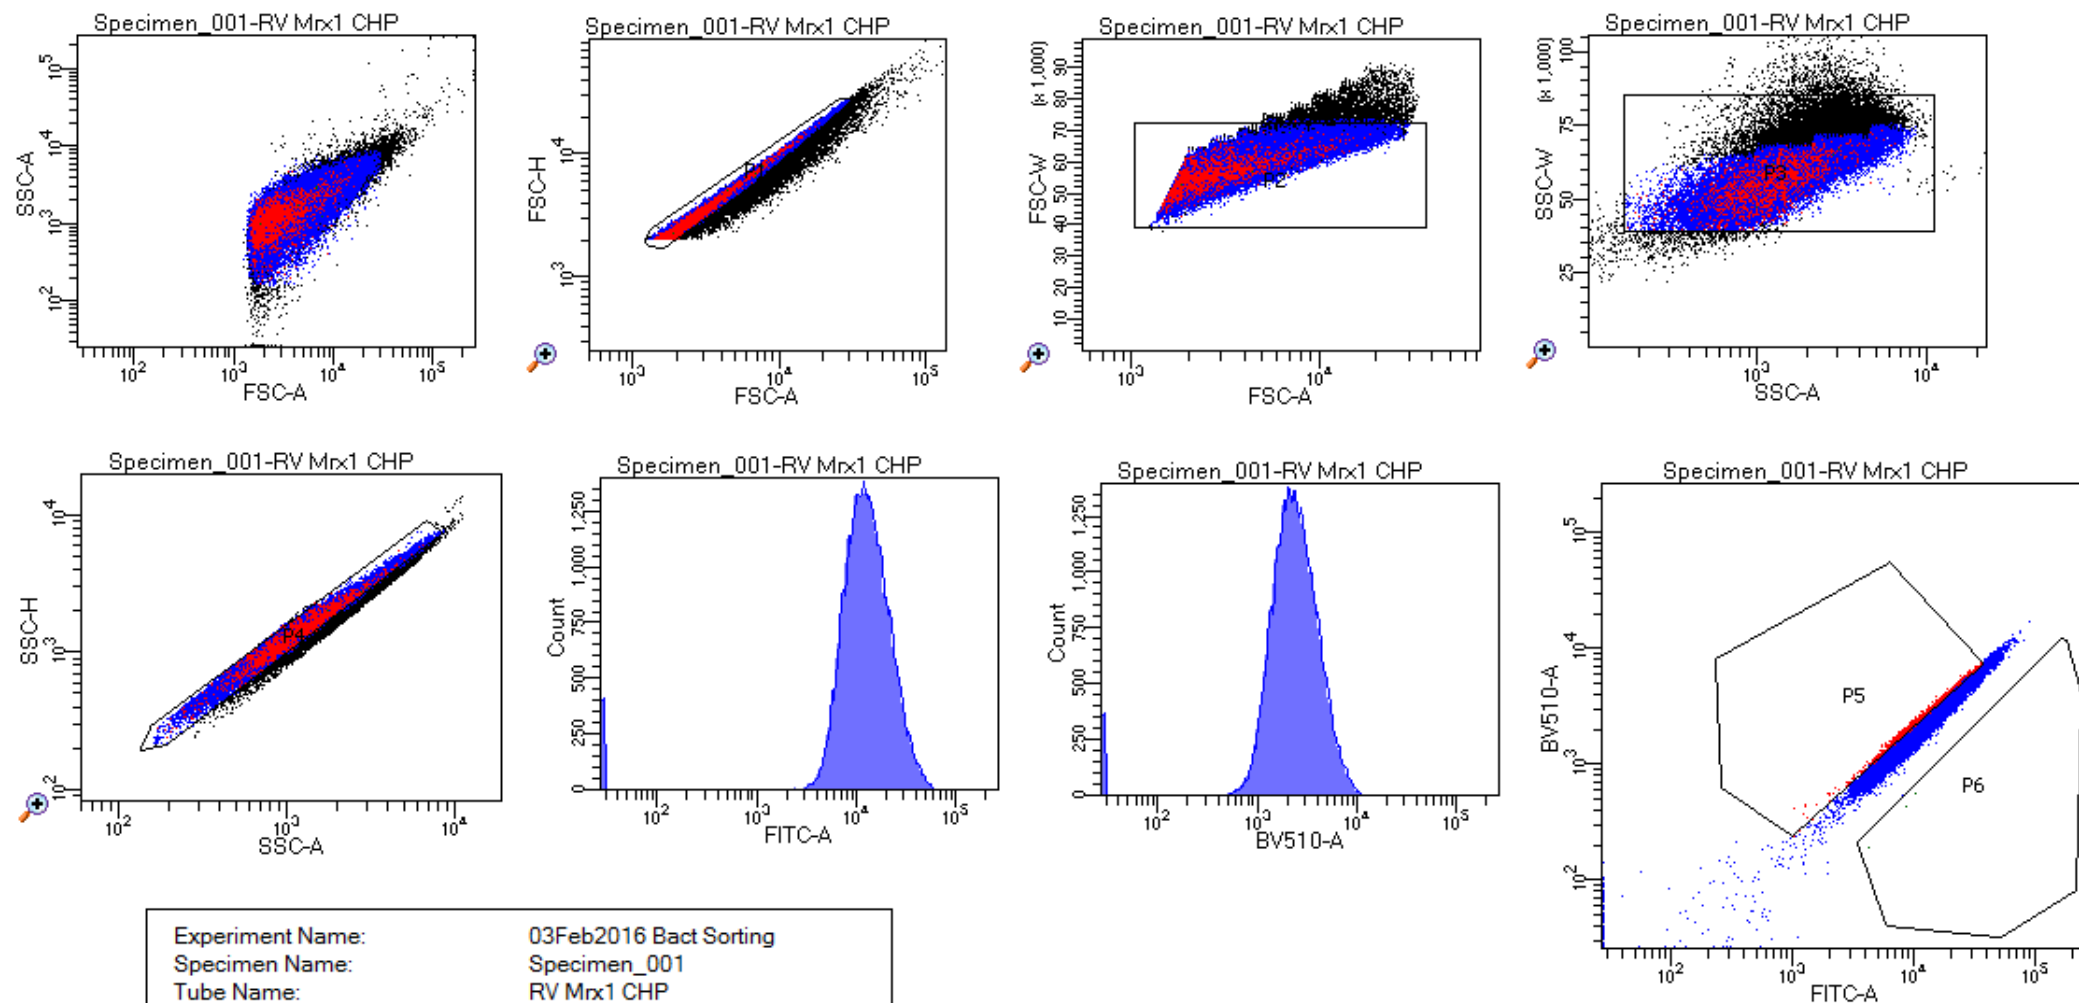

Experiment Name: 03Feb2016 Bact Sorting  
 Specimen Name: Specimen\_001  
 Tube Name: RV Mrx1 CHP  
 Record Date: Feb 3, 2016 3:22:42 PM  
 SOP: Administrator  
 GUID: 14cc8366-2b97-4646-b979-0d6...

| Population | #Events | %Parent | FITC-A<br>Median | BV510-A<br>Median |
|------------|---------|---------|------------------|-------------------|
| All Events | 71,472  | ####    | 13,991           | 2,586             |
| P1         | 66,031  | 92.4    | 13,383           | 2,479             |
| P2         | 63,100  | 95.6    | 12,928           | 2,395             |
| P3         | 61,635  | 97.7    | 12,950           | 2,399             |
| P4         | 49,824  | 80.8    | 11,737           | 2,183             |
| P5         | 1,416   | 2.8     | 10,805           | 2,366             |
| P6         | 5       | 0.0     | 7,776            | 437               |

Tube: RV Mrx1 CHP

| Population | #Events | %Parent | %Total |
|------------|---------|---------|--------|
| All Events | 71,472  | ####    | 100.0  |
| P1         | 66,031  | 92.4    | 92.4   |
| P2         | 63,100  | 95.6    | 88.3   |
| P3         | 61,635  | 97.7    | 86.2   |
| P4         | 49,824  | 80.8    | 69.7   |
| P5         | 1,416   | 2.8     | 2.0    |
| P6         | 5       | 0.0     | 0.0    |



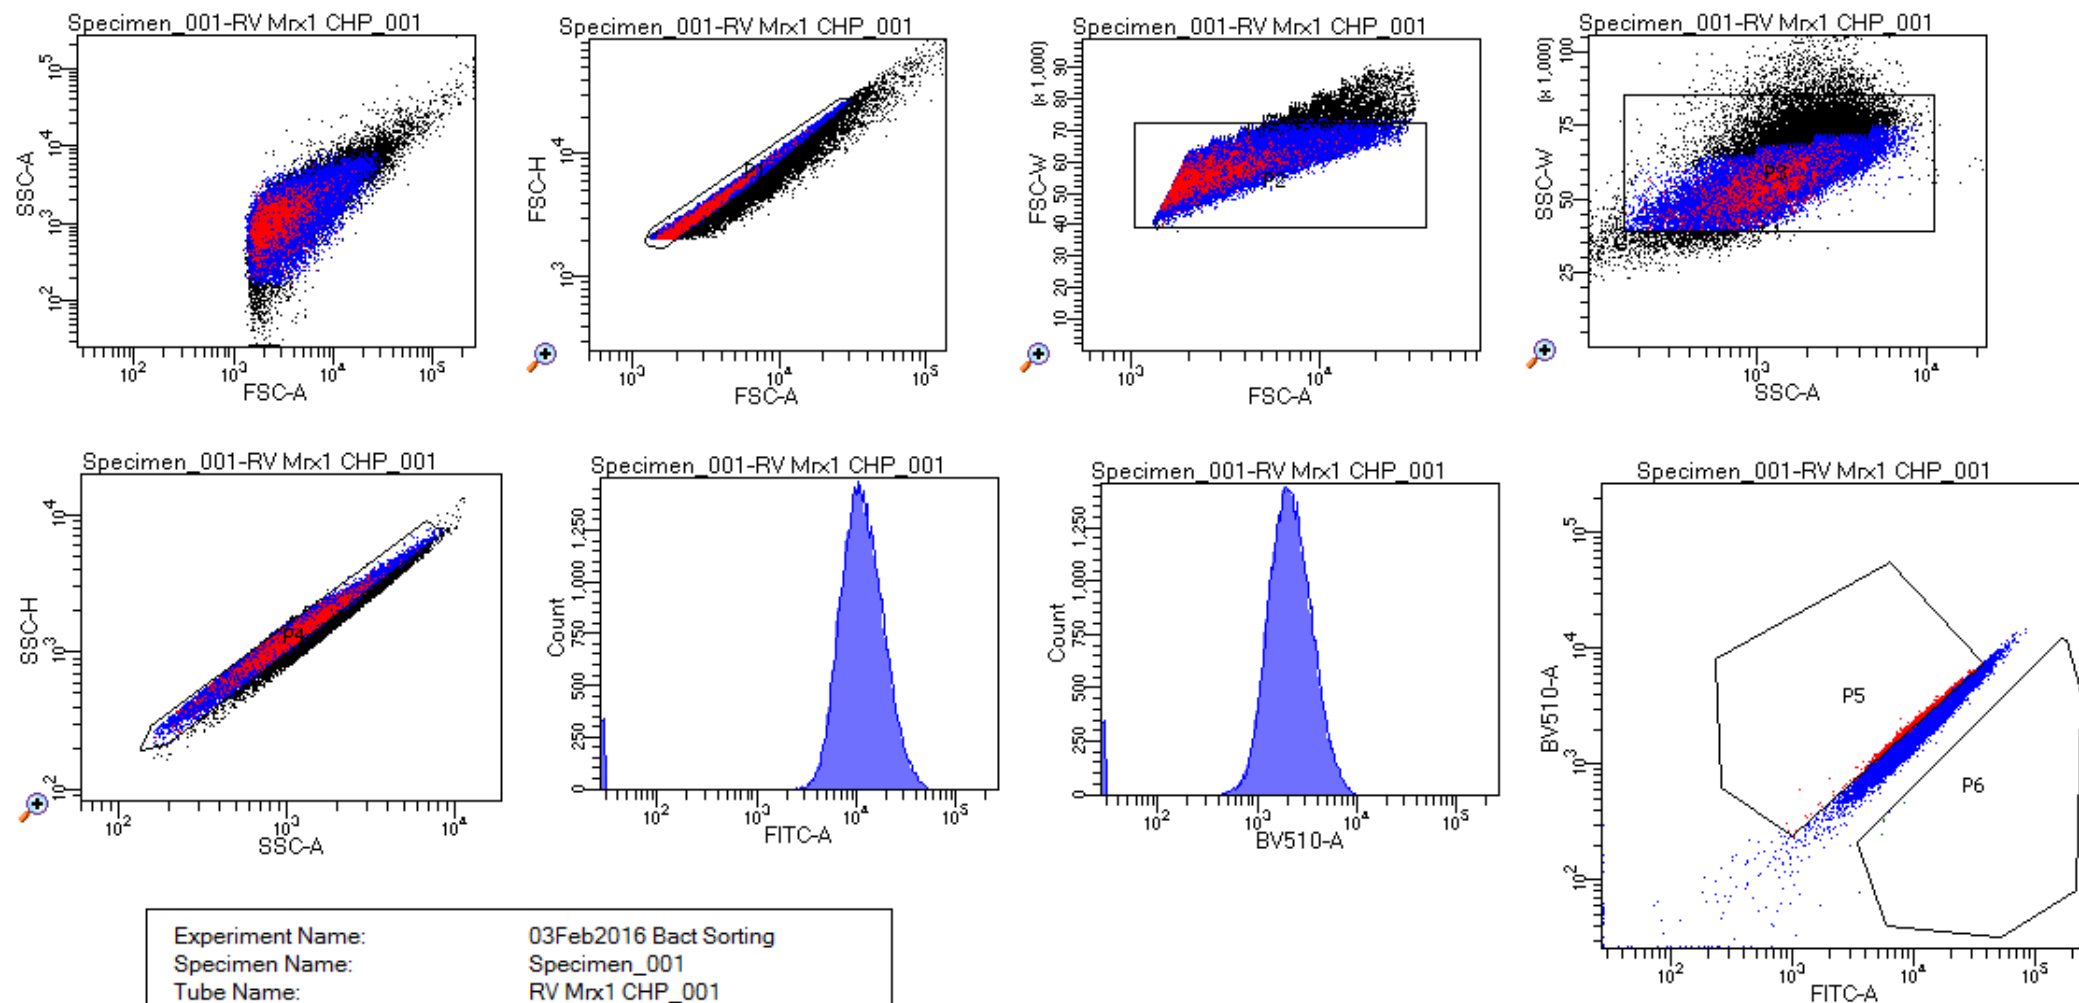

Experiment Name: 03Feb2016 Bact Sorting  
 Specimen Name: Specimen\_001  
 Tube Name: RV Mrx1 CHP\_001  
 Record Date: Feb 3, 2016 3:23:34 PM  
 SOP: Administrator  
 GUID: 91a05edf-ffbc-4741-b4dd-10f7b...

| Population | #Events | %Parent | FITC-A<br>Median | BV510-A<br>Median |
|------------|---------|---------|------------------|-------------------|
| All Events | 70,694  | ####    | 12,270           | 2,271             |
| P1         | 64,612  | 91.4    | 11,680           | 2,162             |
| P2         | 62,245  | 96.3    | 11,370           | 2,108             |
| P3         | 60,124  | 96.6    | 11,447           | 2,120             |
| P4         | 49,767  | 82.8    | 10,562           | 1,965             |
| P5         | 1,399   | 2.8     | 10,233           | 2,261             |
| P6         | 4       | 0.0     | 5,552            | 323               |

Tube: RV Mrx1 CHP\_001

| Population | #Events | %Parent | %Total |
|------------|---------|---------|--------|
| All Events | 70,694  | ####    | 100.0  |
| P1         | 64,612  | 91.4    | 91.4   |
| P2         | 62,245  | 96.3    | 88.0   |
| P3         | 60,124  | 96.6    | 85.0   |
| P4         | 49,767  | 82.8    | 70.4   |
| P5         | 1,399   | 2.8     | 2.0    |
| P6         | 4       | 0.0     | 0.0    |



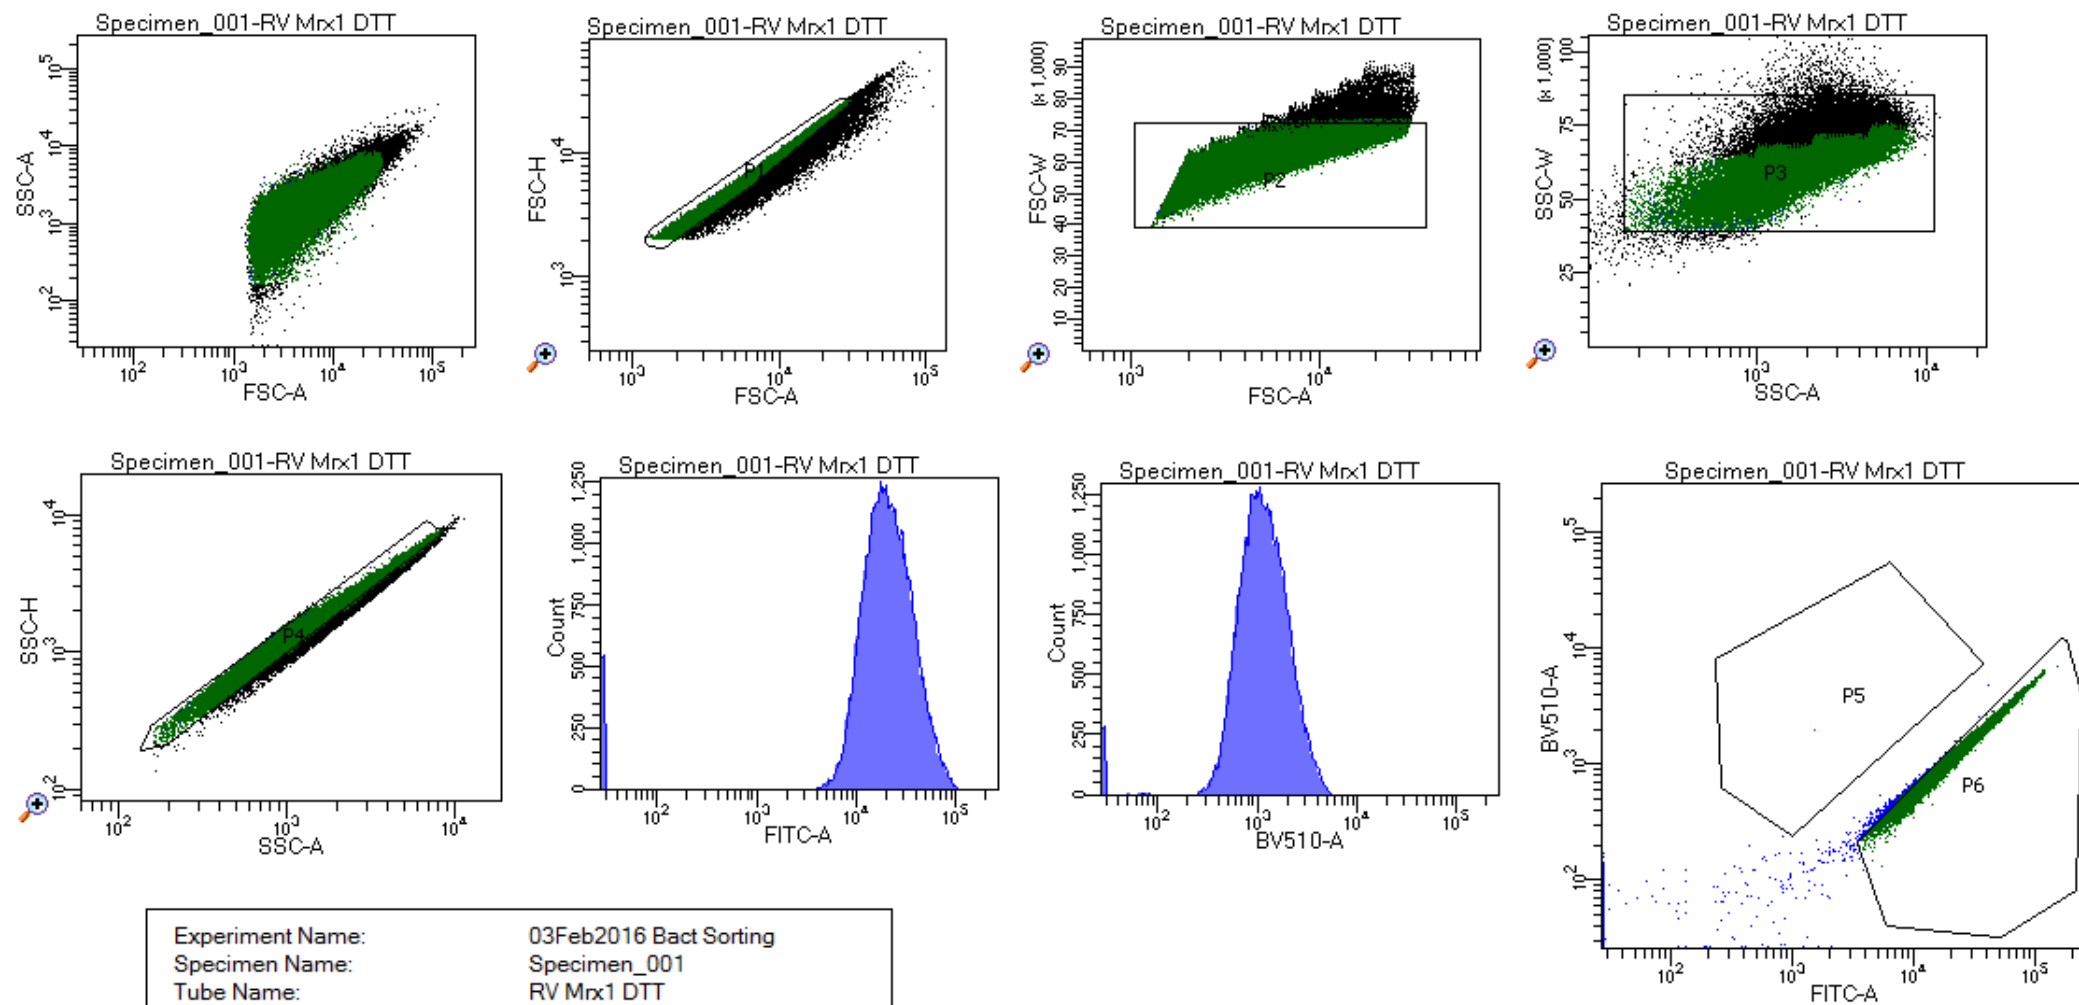

Experiment Name: 03Feb2016 Bact Sorting  
 Specimen Name: Specimen\_001  
 Tube Name: RV Mrx1 DTT  
 Record Date: Feb 3, 2016 3:24:34 PM  
 SOP: Administrator  
 GUID: efefc59e-5606-4206-bd4c-6326...

| Population | #Events | %Parent | FITC-A<br>Median | BV510-A<br>Median |
|------------|---------|---------|------------------|-------------------|
| All Events | 80,498  | ####    | 24,715           | 1,344             |
| P1         | 73,100  | 90.8    | 23,401           | 1,276             |
| P2         | 67,922  | 92.9    | 22,035           | 1,202             |
| P3         | 66,746  | 98.3    | 22,033           | 1,202             |
| P4         | 50,000  | 74.9    | 19,122           | 1,049             |
| P5         | 1       | 0.0     | 1,470            | 2,000             |
| P6         | 48,807  | 97.6    | 19,455           | 1,066             |

Tube: RV Mrx1 DTT

| Population | #Events | %Parent | %Total |
|------------|---------|---------|--------|
| All Events | 80,498  | ####    | 100.0  |
| P1         | 73,100  | 90.8    | 90.8   |
| P2         | 67,922  | 92.9    | 84.4   |
| P3         | 66,746  | 98.3    | 82.9   |
| P4         | 50,000  | 74.9    | 62.1   |
| P5         | 1       | 0.0     | 0.0    |
| P6         | 48,807  | 97.6    | 60.6   |



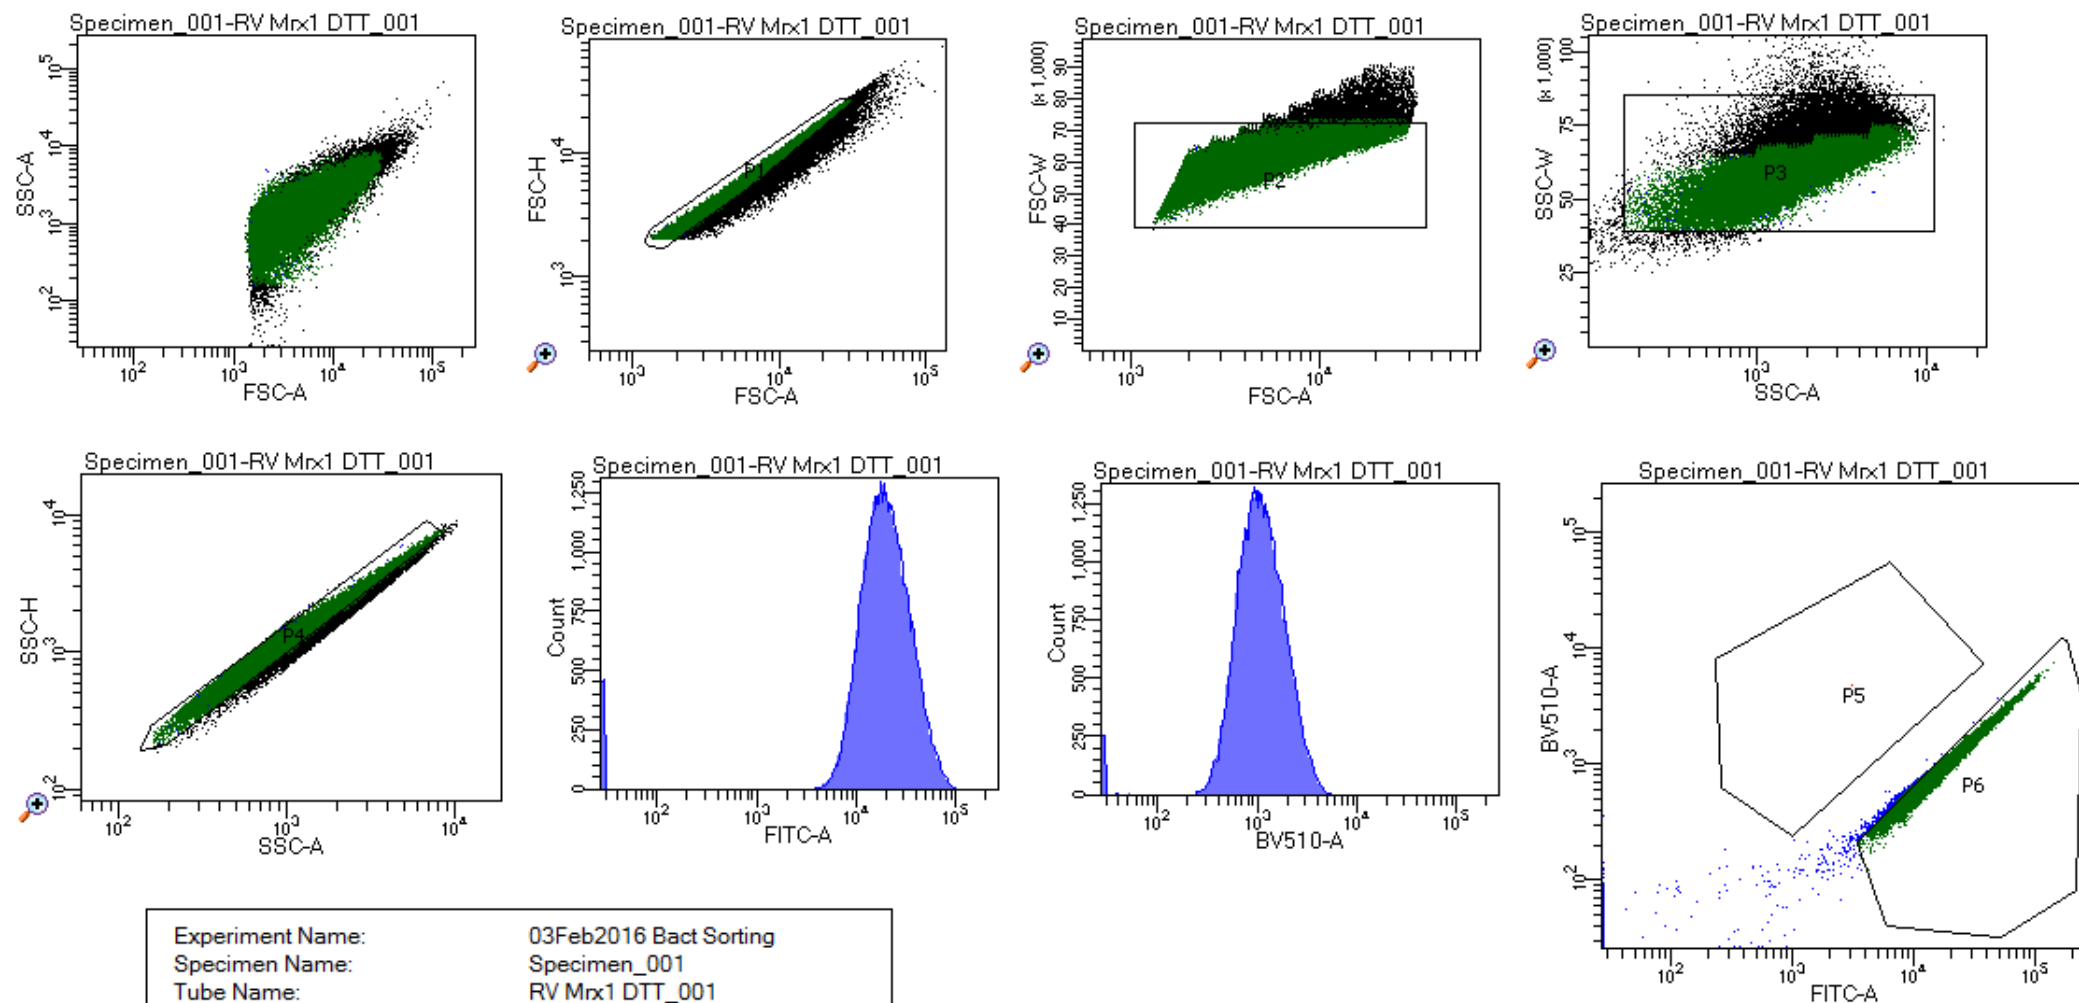

Experiment Name: 03Feb2016 Bact Sorting  
 Specimen Name: Specimen\_001  
 Tube Name: RV Mrx1 DTT\_001  
 Record Date: Feb 3, 2016 3:25:47 PM  
 SOP: Administrator  
 GUID: 33b9914e-eed8-4b67-9ae4-bf6f...

| Population | #Events | %Parent | FITC-A<br>Median | BV510-A<br>Median |
|------------|---------|---------|------------------|-------------------|
| All Events | 78,431  | ####    | 22,966           | 1,241             |
| P1         | 71,141  | 90.7    | 21,806           | 1,180             |
| P2         | 66,735  | 93.8    | 20,758           | 1,123             |
| P3         | 65,384  | 98.0    | 20,767           | 1,124             |
| P4         | 50,000  | 76.5    | 18,260           | 992               |
| P5         | 1       | 0.0     | 3,078            | 4,761             |
| P6         | 48,870  | 97.7    | 18,570           | 1,008             |

Tube: RV Mrx1 DTT\_001

| Population | #Events | %Parent | %Total |
|------------|---------|---------|--------|
| All Events | 78,431  | ####    | 100.0  |
| P1         | 71,141  | 90.7    | 90.7   |
| P2         | 66,735  | 93.8    | 85.1   |
| P3         | 65,384  | 98.0    | 83.4   |
| P4         | 50,000  | 76.5    | 63.8   |
| P5         | 1       | 0.0     | 0.0    |
| P6         | 48,870  | 97.7    | 62.3   |



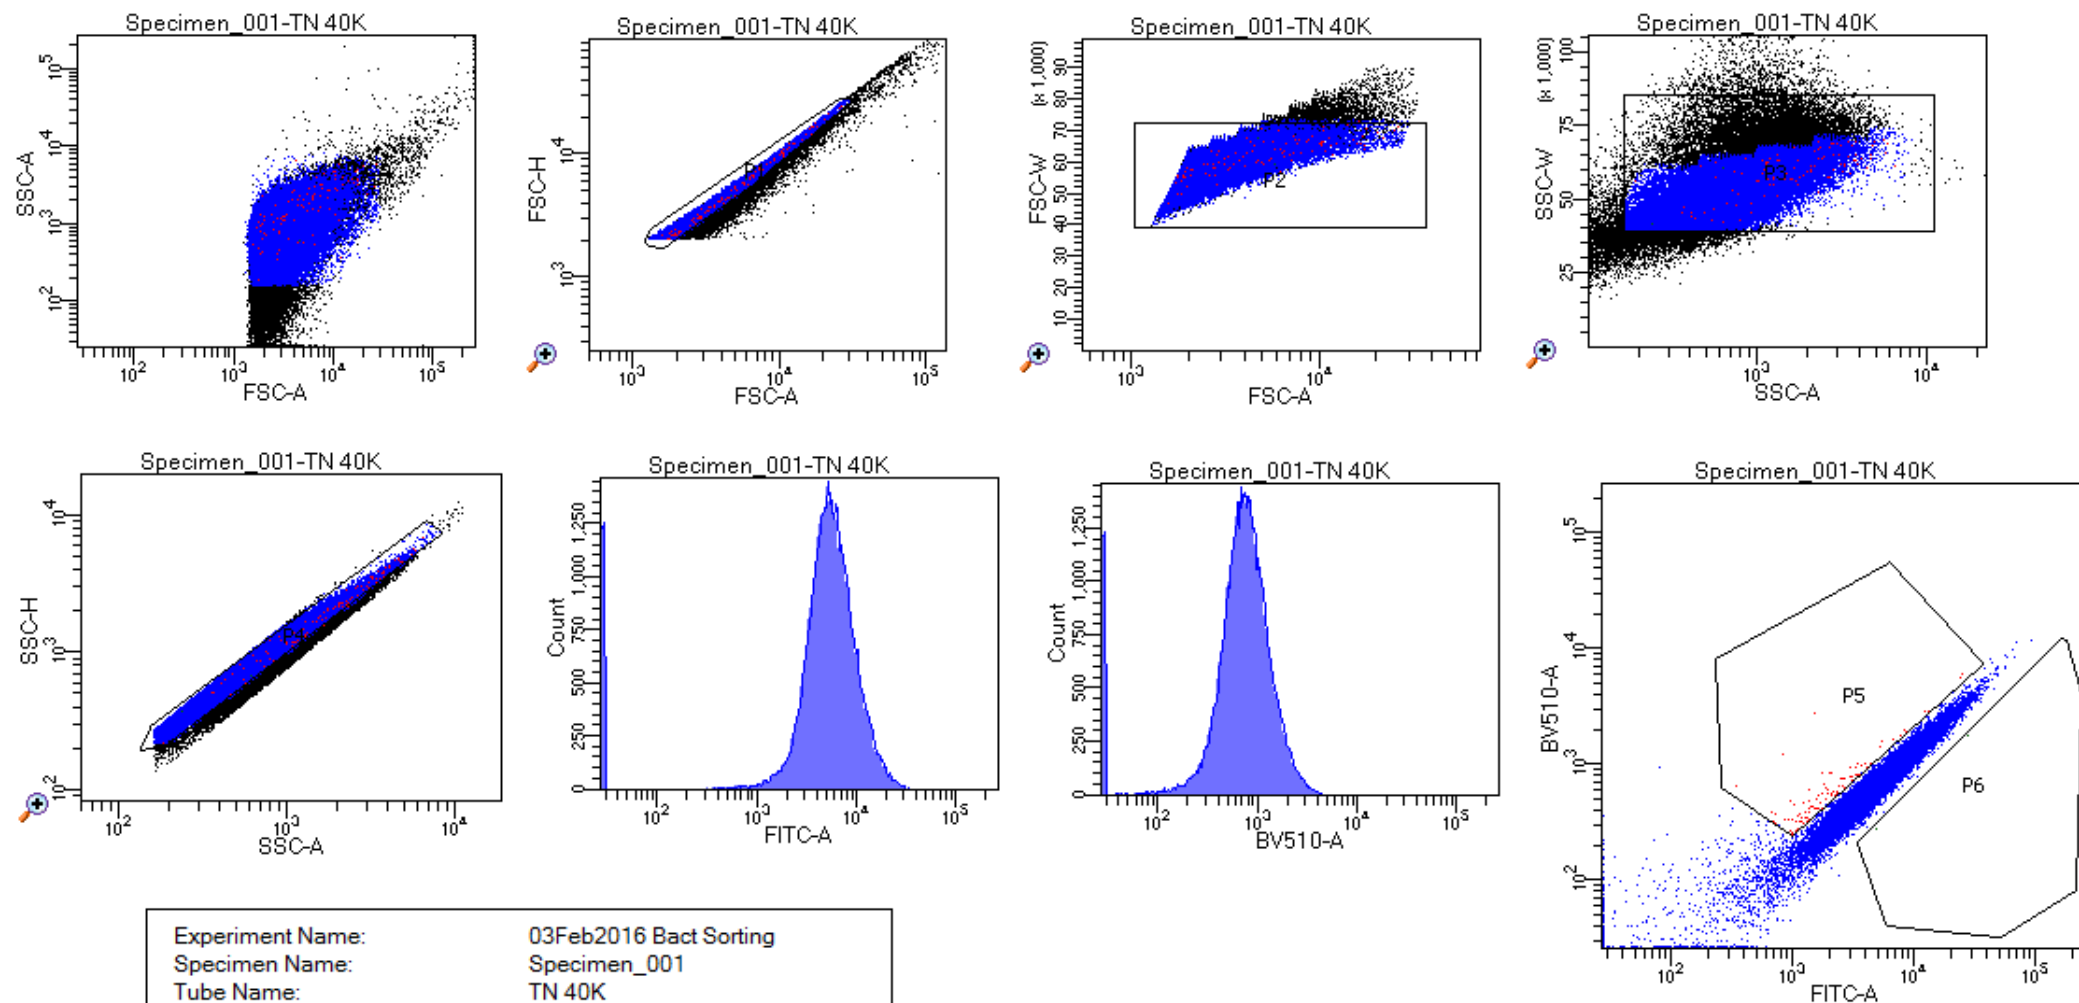

Experiment Name: 03Feb2016 Bact Sorting  
 Specimen Name: Specimen\_001  
 Tube Name: TN 40K  
 Record Date: Feb 3, 2016 3:27:17 PM  
 SOP: Administrator  
 GUID: 5afa2684-77fb-42ab-b268-9cf9...

| Population | #Events | %Parent | FITC-A<br>Median | BV510-A<br>Median |
|------------|---------|---------|------------------|-------------------|
| All Events | 77,609  | ####    | 5,428            | 738               |
| P1         | 70,083  | 90.3    | 5,246            | 713               |
| P2         | 68,458  | 97.7    | 5,167            | 702               |
| P3         | 59,505  | 86.9    | 5,370            | 728               |
| P4         | 50,000  | 84.0    | 5,090            | 692               |
| P5         | 101     | 0.2     | 1,707            | 548               |
| P6         | 2       | 0.0     | 16,306           | 1,009             |

Tube: TN 40K

| Population | #Events | %Parent | %Total |
|------------|---------|---------|--------|
| All Events | 77,609  | ####    | 100.0  |
| P1         | 70,083  | 90.3    | 90.3   |
| P2         | 68,458  | 97.7    | 88.2   |
| P3         | 59,505  | 86.9    | 76.7   |
| P4         | 50,000  | 84.0    | 64.4   |
| P5         | 101     | 0.2     | 0.1    |
| P6         | 2       | 0.0     | 0.0    |



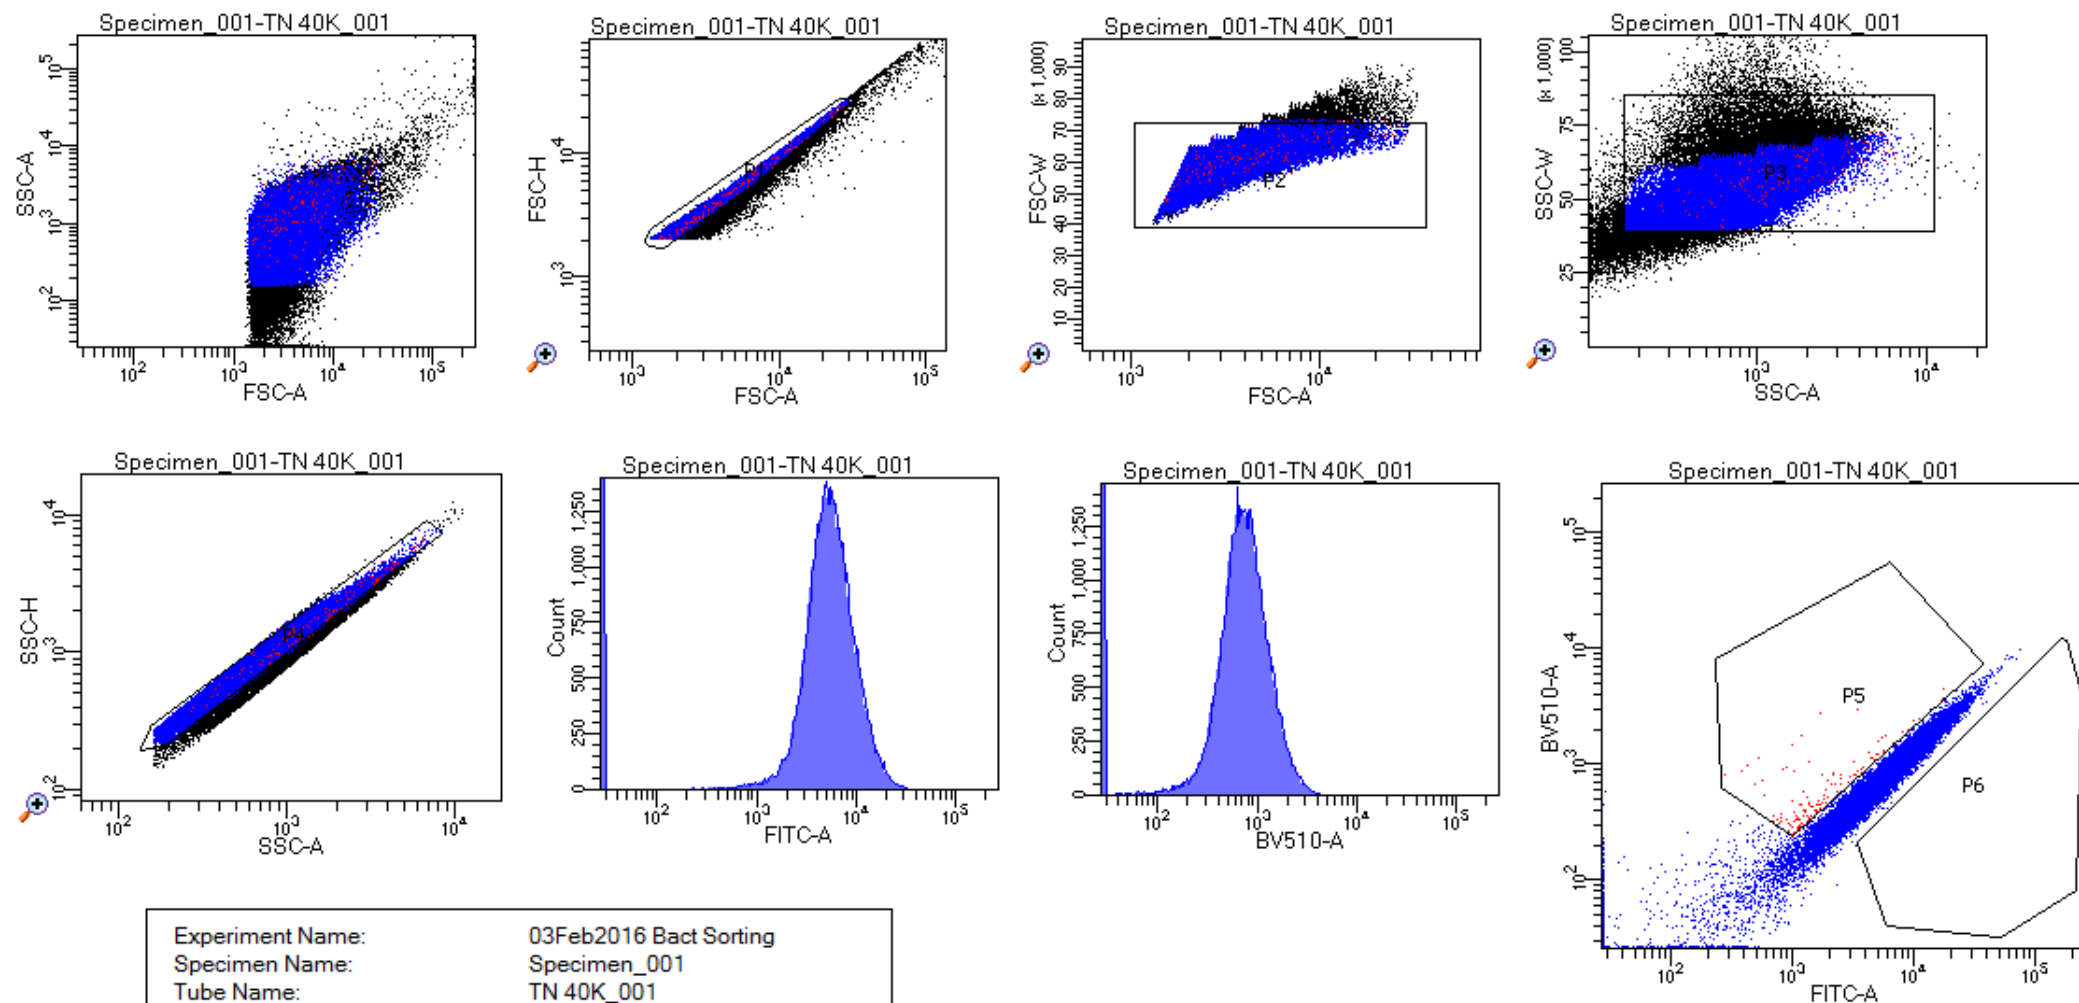

Experiment Name: 03Feb2016 Bact Sorting  
 Specimen Name: Specimen\_001  
 Tube Name: TN 40K\_001  
 Record Date: Feb 3, 2016 3:30:57 PM  
 SOP: Administrator  
 GUID: 1b423a43-4da6-47ea-9734-9f4...

| Population | #Events | %Parent | FITC-A<br>Median | BV510-A<br>Median |
|------------|---------|---------|------------------|-------------------|
| All Events | 80,849  | ####    | 5,326            | 720               |
| P1         | 71,890  | 88.9    | 5,134            | 694               |
| P2         | 70,155  | 97.6    | 5,050            | 682               |
| P3         | 60,214  | 85.8    | 5,260            | 709               |
| P4         | 50,000  | 83.0    | 4,966            | 670               |
| P5         | 135     | 0.3     | 1,379            | 490               |
| P6         | 0       | 0.0     | ####             | ####              |

Tube: TN 40K\_001

| Population | #Events | %Parent | %Total |
|------------|---------|---------|--------|
| All Events | 80,849  | ####    | 100.0  |
| P1         | 71,890  | 88.9    | 88.9   |
| P2         | 70,155  | 97.6    | 86.8   |
| P3         | 60,214  | 85.8    | 74.5   |
| P4         | 50,000  | 83.0    | 61.8   |
| P5         | 135     | 0.3     | 0.2    |
| P6         | 0       | 0.0     | 0.0    |



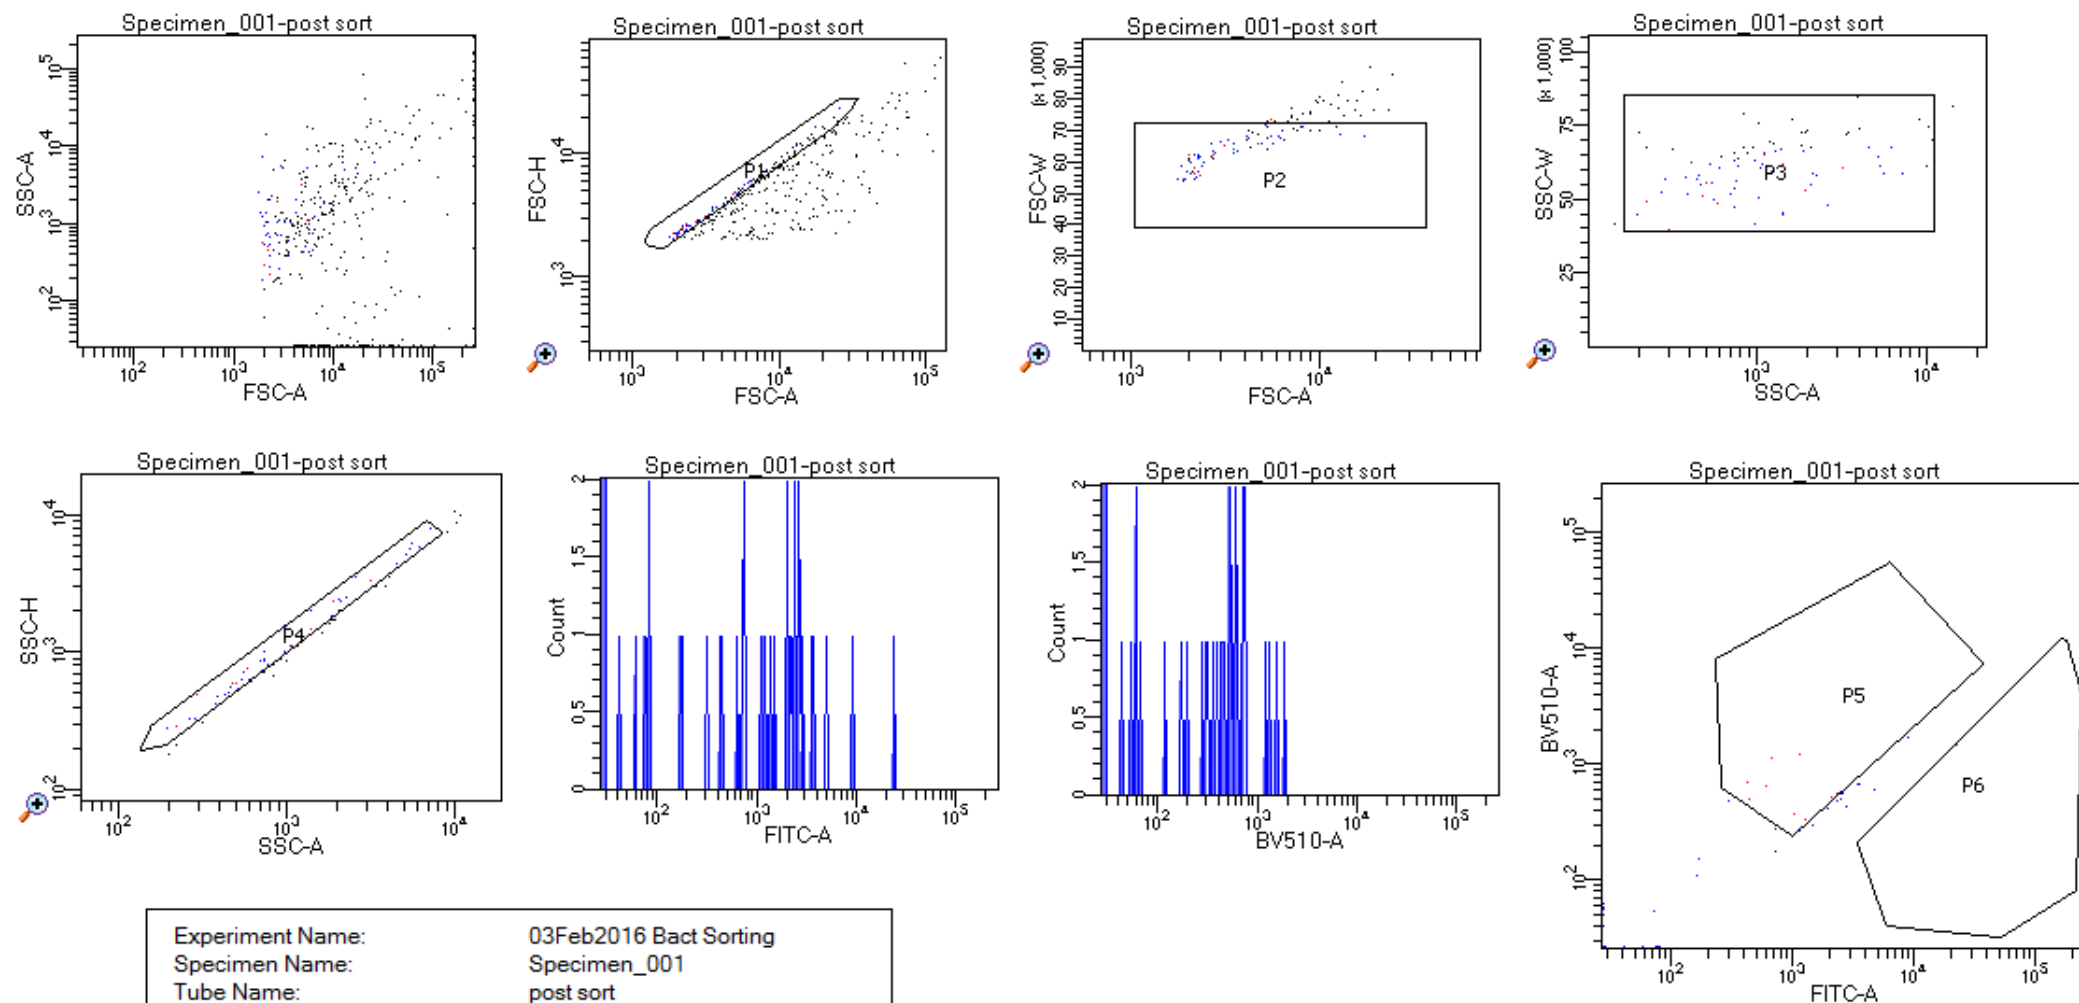

Experiment Name: 03Feb2016 Bact Sorting  
 Specimen Name: Specimen\_001  
 Tube Name: post sort  
 Record Date: Feb 3, 2016 5:14:37 PM  
 SOP: Administrator  
 GUID: 62a38b5b-4eb5-4a77-b5e4-42f...

| Population | #Events | %Parent | FITC-A<br>Median | BV510-A<br>Median |
|------------|---------|---------|------------------|-------------------|
| All Events | 366     | ####    | 78               | 66                |
| P1         | 107     | 29.2    | 897              | 335               |
| P2         | 80      | 74.8    | 696              | 276               |
| P3         | 77      | 96.3    | 809              | 286               |
| P4         | 50      | 64.9    | 347              | 221               |
| P5         | 9       | 18.0    | 1,016            | 558               |
| P6         | 1       | 2.0     | 22,699           | 1,465             |

Tube: post sort

| Population | #Events | %Parent | %Total |
|------------|---------|---------|--------|
| All Events | 366     | ####    | 100.0  |
| P1         | 107     | 29.2    | 29.2   |
| P2         | 80      | 74.8    | 21.9   |
| P3         | 77      | 96.2    | 21.0   |
| P4         | 50      | 64.9    | 13.7   |
| P5         | 9       | 18.0    | 2.5    |
| P6         | 1       | 2.0     | 0.3    |
