# Supplementary material for: Biosensor-integrated transposon mutagenesis reveals rv0158 as a coordinator of redox homeostasis in Mycobacterium tuberculosis
Source: eLife journal article supplement (doi:10.7554/elife.80218), 2023-08-29
Supplement: supp [file elife-80218-supp-v1.zip]

# Batch Analysis Report

Run Date: 5/16/16 11:39 AM

Experiment: 16May2016 Bac sorting

User ID: Administrator

Statistics Output: N/A

Worksheet PDF Output: C:\Users\Admin\Desktop\16May2016 Bac sorting-Batch\_Analysis\_16052016113903.pdf

## Specimen\_001

| Tube   | Status | Run Time         |
|--------|--------|------------------|
| US     | OK     | 5/16/16 11:39 AM |
| Mrx1   | OK     | 5/16/16 11:39 AM |
| MRX1 1 | OK     | 5/16/16 11:39 AM |
| TN40k  | OK     | 5/16/16 11:39 AM |

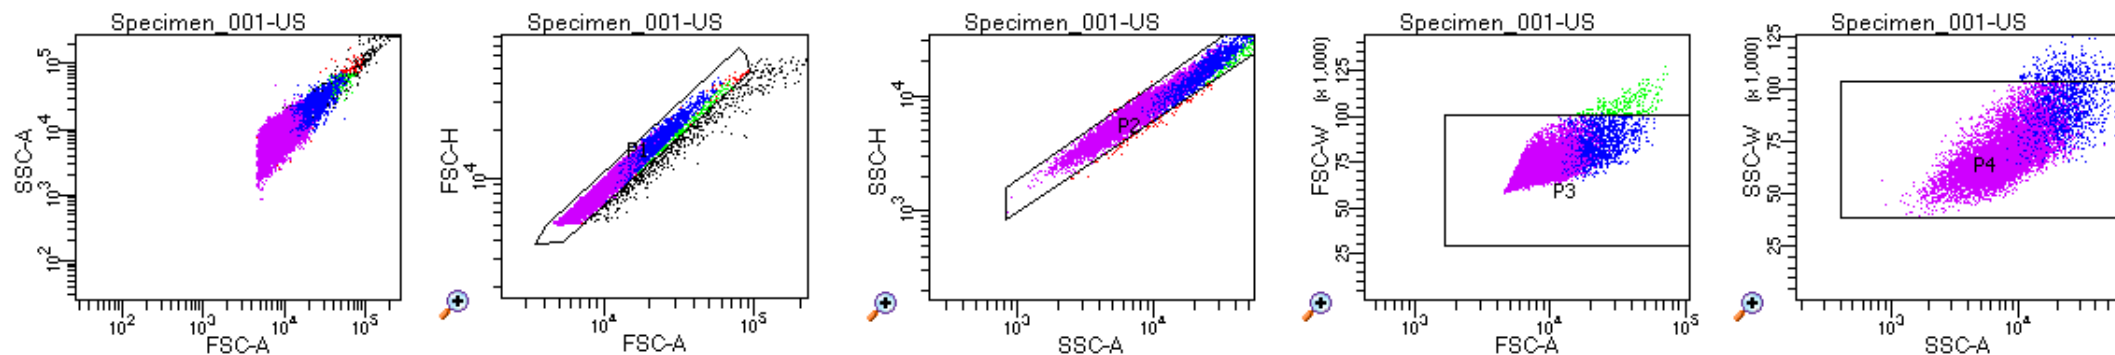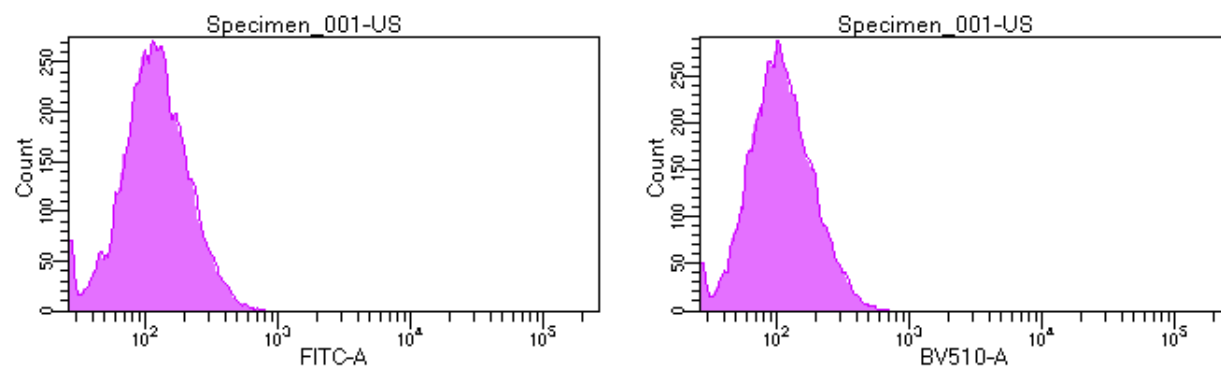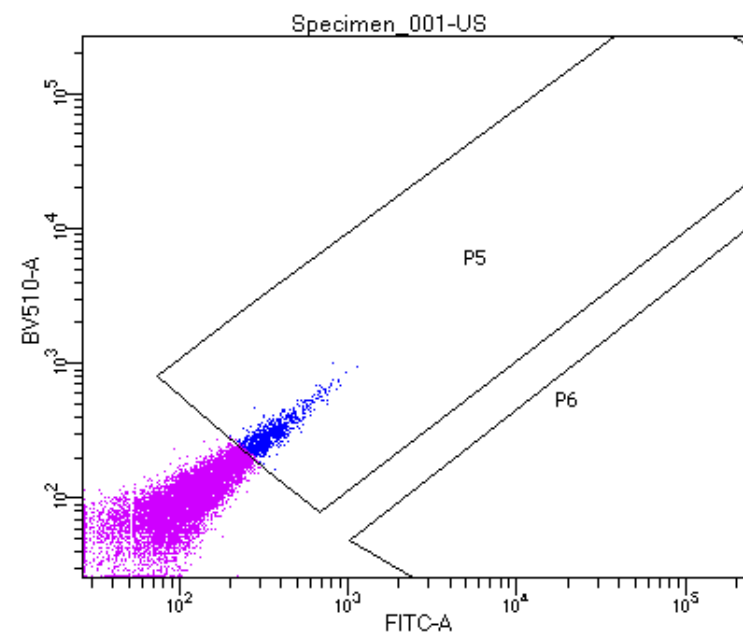

Tube: US

| Population | #Events | %Parent | %Total |
|------------|---------|---------|--------|
| All Events | 11,319  | ####    | 100.0  |
| P1         | 10,720  | 94.7    | 94.7   |
| P2         | 10,567  | 98.6    | 93.4   |
| P3         | 10,362  | 98.1    | 91.5   |
| P4         | 10,084  | 97.3    | 89.1   |
| P5         | 849     | 8.4     | 7.5    |
| P6         | 0       | 0.0     | 0.0    |

Experiment Name: 16May2016 Bac sorting  
 Specimen Name: Specimen\_001  
 Tube Name: US  
 Record Date: May 16, 2016 11:34:26 AM  
 SOP: Administrator  
 GUID: 31fa8bf9-36c1-4ab7-9ee3-f1934c6e3670

| Population | %Parent | %Grand Parent | %Total | FITC-A<br>Median | BV510-A<br>Median |
|------------|---------|---------------|--------|------------------|-------------------|
| P4         | 97.3    | 95.4          | 89.1   | 113              | 101               |
| P5         | 8.4     | 8.2           | 7.5    | 319              | 285               |
| P6         | 0.0     | 0.0           | 0.0    | ####             | ####              |

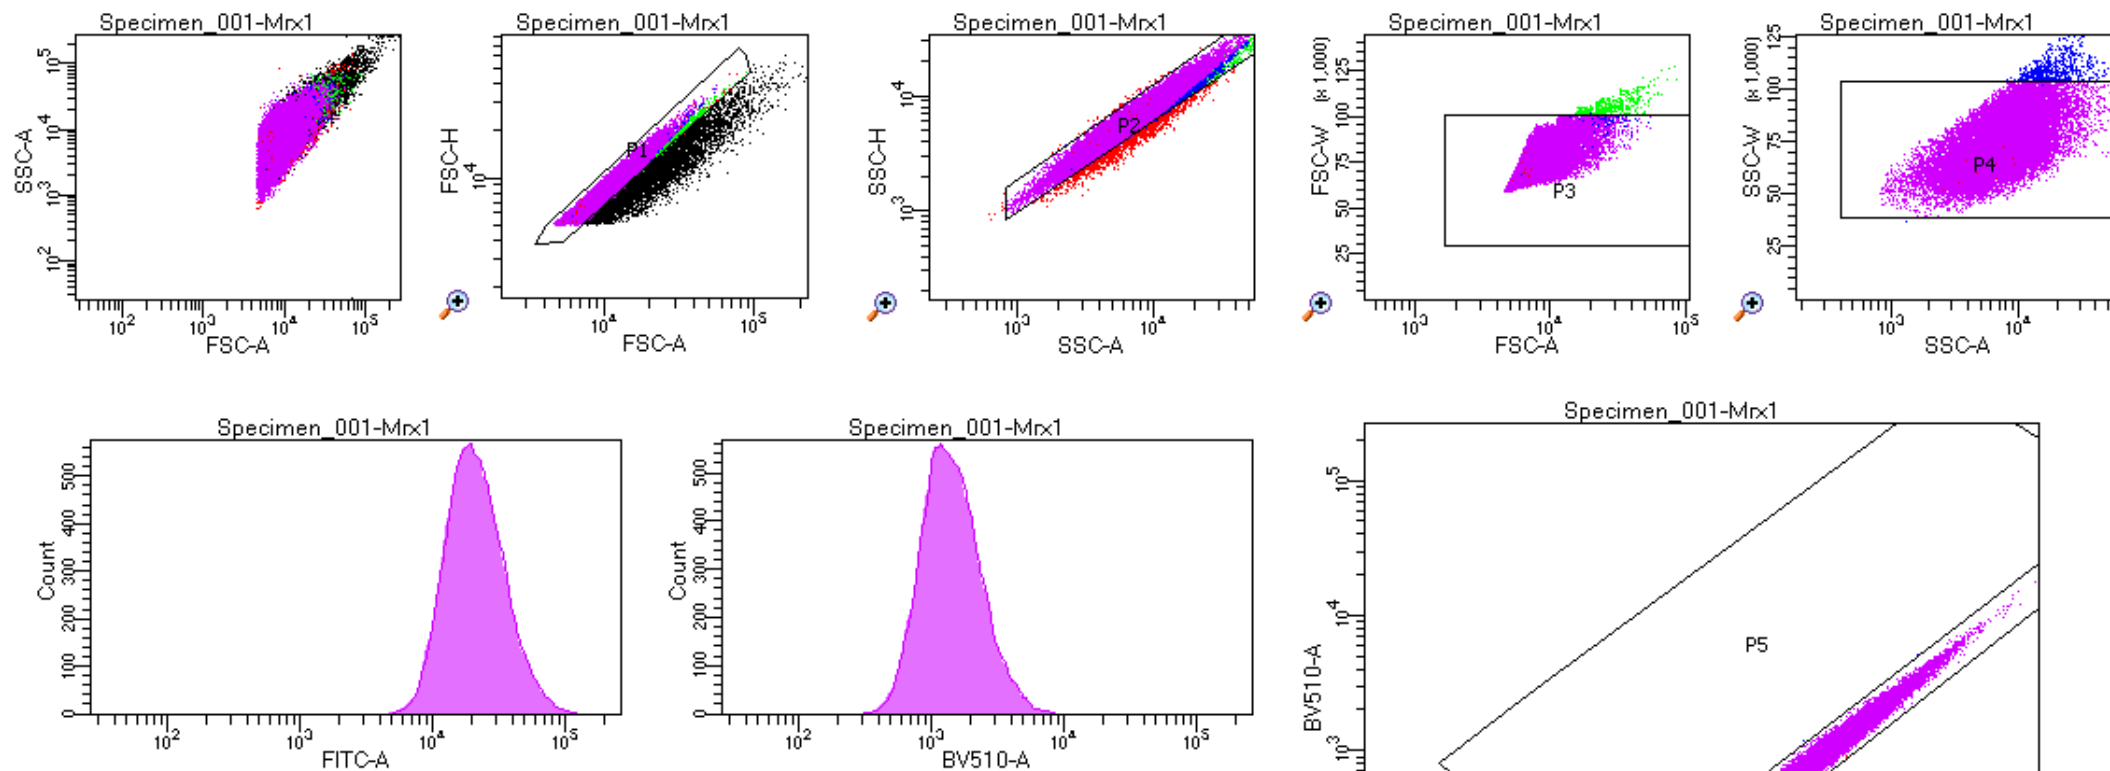

Tube: Mrx1

| Population | #Events | %Parent | %Total |
|------------|---------|---------|--------|
| All Events | 29,979  | ####    | 100.0  |
| P1         | 22,554  | 75.2    | 75.2   |
| P2         | 20,975  | 93.0    | 70.0   |
| P3         | 20,582  | 98.1    | 68.7   |
| P4         | 20,000  | 97.2    | 66.7   |
| P5         | 2       | 0.0     | 0.0    |
| P6         | 10      | 0.0     | 0.0    |

|                  |                                      |
|------------------|--------------------------------------|
| Experiment Name: | 16May2016 Bac sorting                |
| Specimen Name:   | Specimen_001                         |
| Tube Name:       | Mrx1                                 |
| Record Date:     | May 16, 2016 11:36:06 AM             |
| SOP:             | Administrator                        |
| GUID:            | c2938a97-2f1b-413c-81aa-fcb2260d303f |

| Population | %Parent | %Grand Parent | %Total | FITC-A<br>Median | BV510-A<br>Median |
|------------|---------|---------------|--------|------------------|-------------------|
| P4         | 97.2    | 95.4          | 66.7   | 19,832           | 1,318             |
| P5         | 0.0     | 0.0           | 0.0    | 30,632           | 3,191             |
| P6         | 0.1     | 0.0           | 0.0    | 12,749           | 589               |

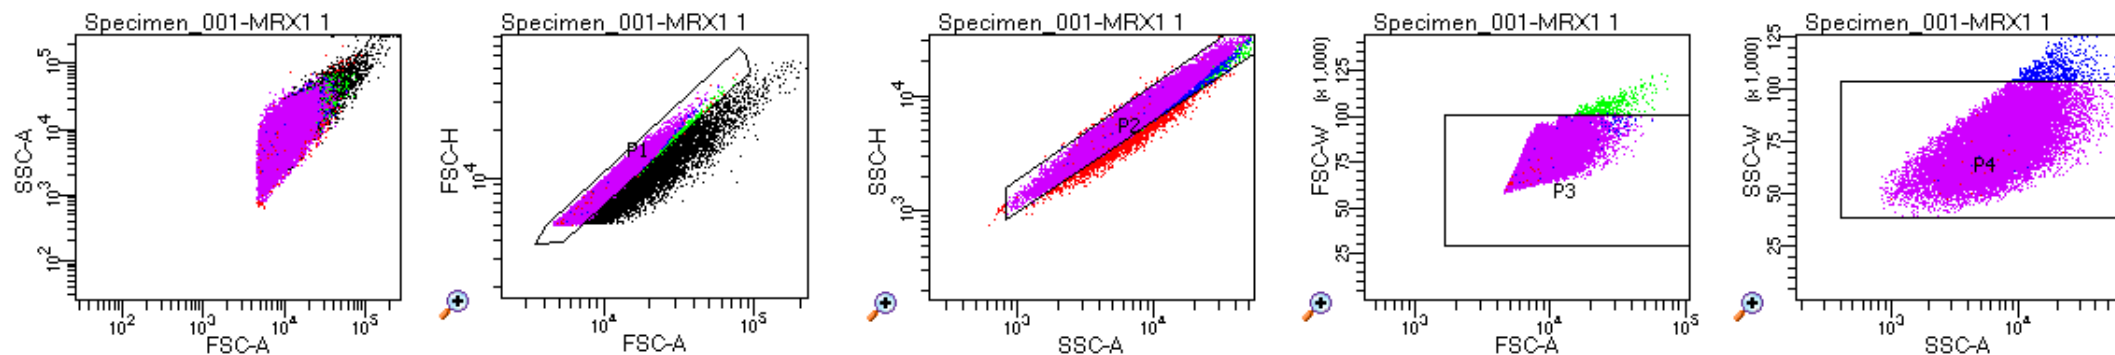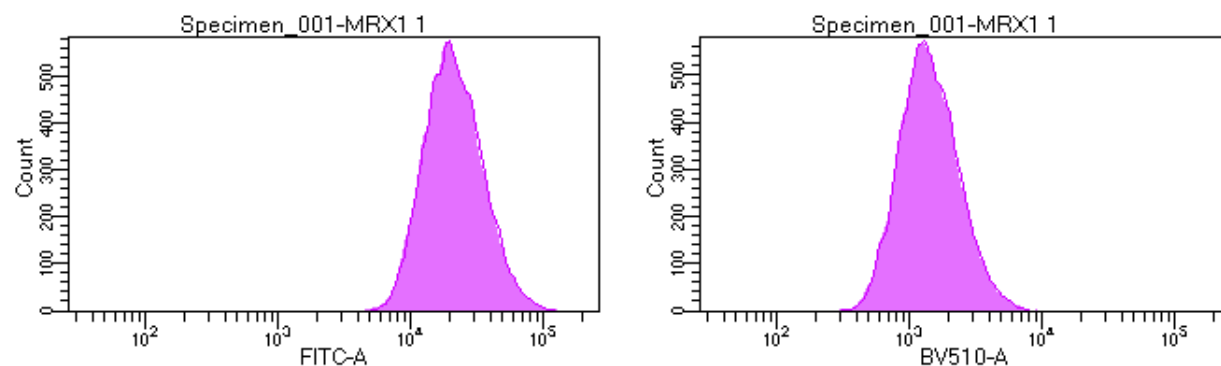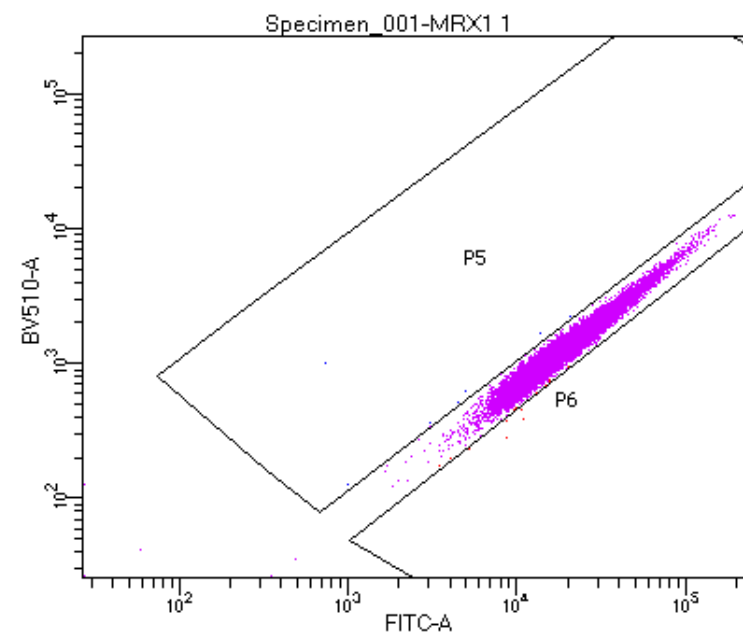

Tube: MRX1 1

| Population | #Events | %Parent | %Total |
|------------|---------|---------|--------|
| All Events | 30,011  | ####    | 100.0  |
| P1         | 22,610  | 75.3    | 75.3   |
| P2         | 20,948  | 92.6    | 69.8   |
| P3         | 20,574  | 98.2    | 68.6   |
| P4         | 20,000  | 97.2    | 66.6   |
| P5         | 7       | 0.0     | 0.0    |
| P6         | 20      | 0.1     | 0.1    |

Experiment Name: 16May2016 Bac sorting  
 Specimen Name: Specimen\_001  
 Tube Name: MRX1 1  
 Record Date: May 16, 2016 11:37:13 AM  
 SOP: Administrator  
 GUID: 03e95433-38d1-4b4a-b1c5-1e10be582e34

| Population | %Parent | %Grand Parent | %Total | FITC-A<br>Median | BV510-A<br>Median |
|------------|---------|---------------|--------|------------------|-------------------|
| P4         | 97.2    | 95.5          | 66.6   | 20,063           | 1,329             |
| P5         | 0.0     | 0.0           | 0.0    | 4,406            | 620               |
| P6         | 0.1     | 0.1           | 0.1    | 10,737           | 463               |

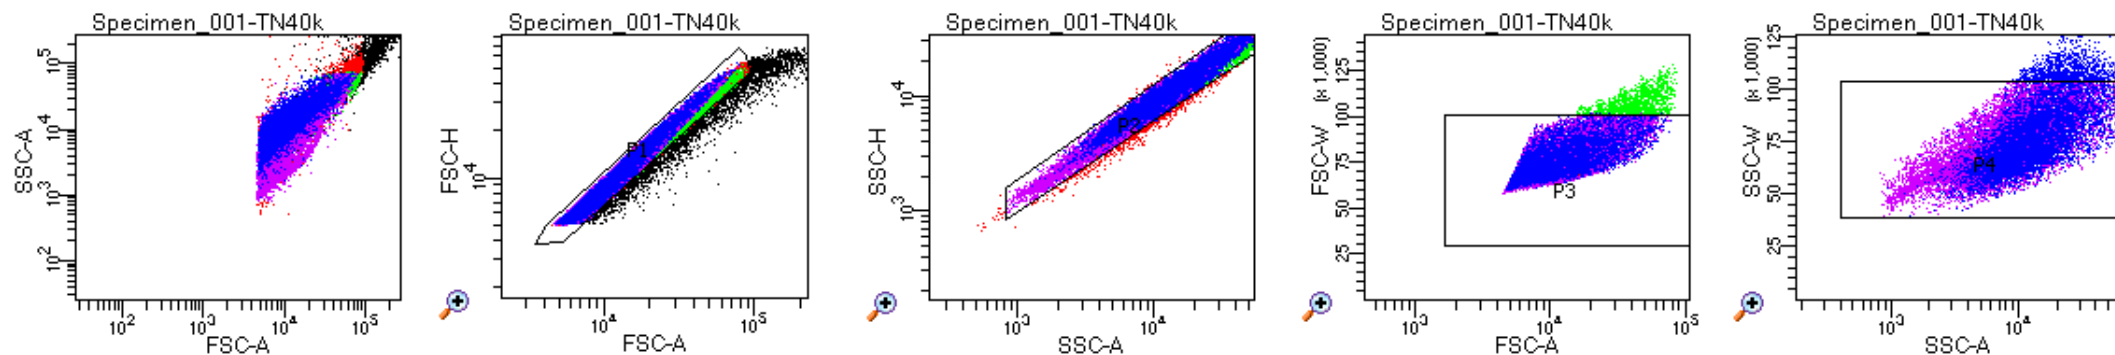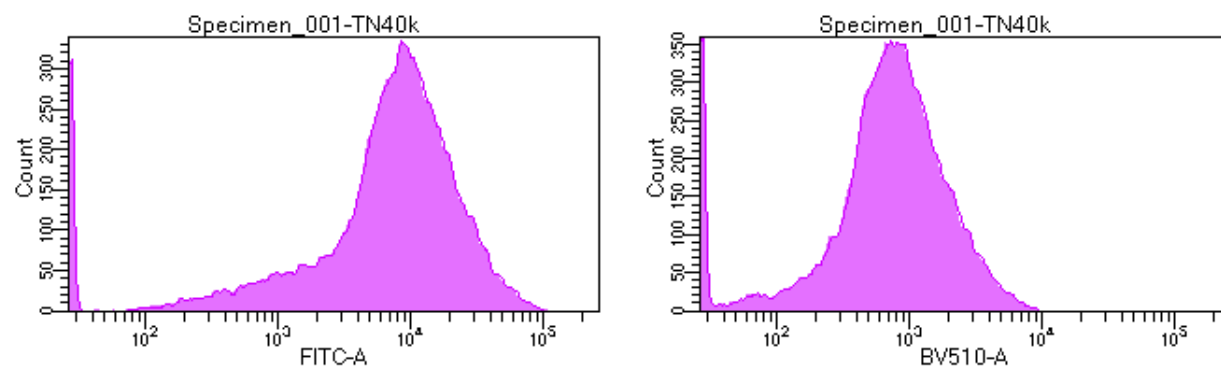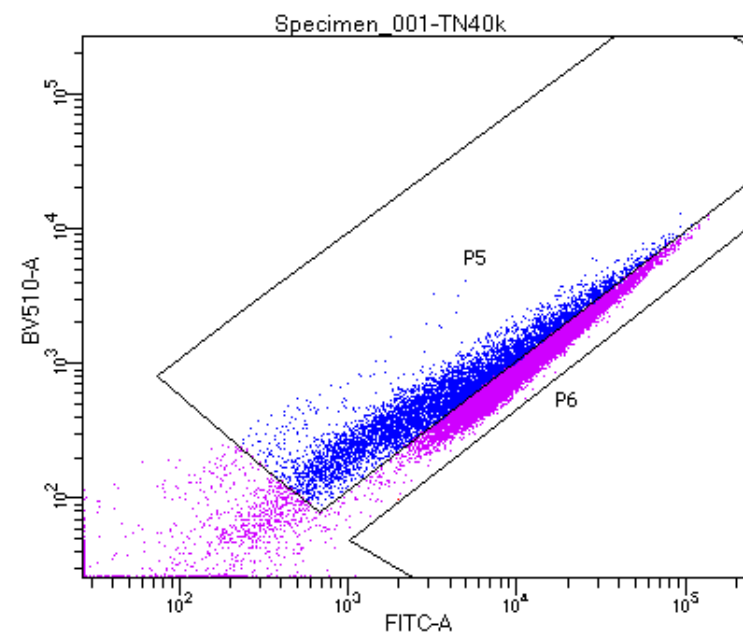

Tube: TN40k

| Population | #Events | %Parent | %Total |
|------------|---------|---------|--------|
| All Events | 25,979  | ####    | 100.0  |
| P1         | 23,001  | 88.5    | 88.5   |
| P2         | 21,984  | 95.6    | 84.6   |
| P3         | 20,961  | 95.3    | 80.7   |
| P4         | 20,000  | 95.4    | 77.0   |
| P5         | 6,089   | 30.4    | 23.4   |
| P6         | 1       | 0.0     | 0.0    |

Experiment Name: 16May2016 Bac sorting  
 Specimen Name: Specimen\_001  
 Tube Name: TN40k  
 Record Date: May 16, 2016 11:38:47 AM  
 SOP: Administrator  
 GUID: 0ddd6a75-c0ad-41aa-82c7-2522e1159d9c

| Population | %Parent | %Grand Parent | %Total | FITC-A Median | BV510-A Median |
|------------|---------|---------------|--------|---------------|----------------|
| P4         | 95.4    | 91.0          | 77.0   | 7,733         | 726            |
| P5         | 30.4    | 29.0          | 23.4   | 3,846         | 587            |
| P6         | 0.0     | 0.0           | 0.0    | 1,952         | 97             |
