# Supplementary material for: Biosensor-integrated transposon mutagenesis reveals rv0158 as a coordinator of redox homeostasis in Mycobacterium tuberculosis
Source: eLife journal article supplement (doi:10.7554/elife.80218), 2023-08-29
Supplement: supp [file elife-80218-supp-v1.zip]

Experiment : Bac sorting  
 Specimen : SS RVMrx1  
 Tube : TN lib ox  
 Sort Layout : Sort Layout\_004  
 Application : FACSDiva Version 8.0.1

## Sort Report

Report Date : 2017.01.31 at 16:49:37  
 Device : 2 Tube  
 User ID : Administrator  
 Cytometer : FACSARIAIII (P65828254001)

### Sort Settings

|             |           |                   |              |
|-------------|-----------|-------------------|--------------|
| Sort Setup  | 70 micron | Precision         | 4-Way Purity |
| Frequency   | 88.9      | Yield Mask        | 0            |
| Amplitude   | 5.3       | Purity Mask       | 32           |
| Phase       | 0.00      | Phase Mask        | 0            |
| Drop Delay  | 44.83     | Single Cell       | Off          |
| Attenuation | Off       | Plates Voltage    | 5,500        |
| Sweet Spot  | On        | Voltage Centering | 6            |
| First Drop  | 200       | Sheath Pressure   | 70.00        |
| Target Gap  | 6         |                   |              |

### Side Stream Voltage (%)

| Far Left | Left  | Right | Far Right |
|----------|-------|-------|-----------|
| 0.00     | 39.00 | 0.00  | 0.00      |

### Neighboring Drop Charge (%)

| 2nd   | 3rd  | 4th  |
|-------|------|------|
| 18.00 | 8.00 | 0.00 |

### Acquisition Counters

|                              |          |
|------------------------------|----------|
| Threshold Count              | 98355662 |
| Processed Events Count(evt)  | 97649504 |
| Electronic Aborts Count(evt) | 2426413  |
| Sort Elapsed Time(hh:mm:ss)  | 01:32:51 |

### Sort Counters

|                       | Left    | Right |
|-----------------------|---------|-------|
| Sort Rate(evt/s)      | 0       | NA    |
| Conflicts Count(evt)  | 1566708 | NA    |
| Conflicts Rate(evt/s) | 0       | NA    |
| Efficiency(%)         | 0       | NA    |

### Sort Layout

| Left         | Right |
|--------------|-------|
| Ox : 5526507 |       |
