# Supplementary material for: Biosensor-integrated transposon mutagenesis reveals rv0158 as a coordinator of redox homeostasis in Mycobacterium tuberculosis
Source: eLife journal article supplement (doi:10.7554/elife.80218), 2023-08-29
Supplement: supp [file elife-80218-supp-v1.zip]

Experiment : 05EDec2016 Bac sorting  
Specimen : 12Dec  
Tube : TN lib  
Sort Layout : Sort Layout\_003  
Application : FACSDiva Version 8.0.1

## Sort Report

Report Date : 2016.12.12 at 15:05:54  
Device : 2 Tube  
User ID : Administrator  
Cytometer : FACSARIAIII (P65828254001)

### Sort Settings

|             |           |                   |       |
|-------------|-----------|-------------------|-------|
| Sort Setup  | 70 micron | Precision         | Yield |
| Frequency   | 88.4      | Yield Mask        | 32    |
| Amplitude   | 4.3       | Purity Mask       | 0     |
| Phase       | 0.00      | Phase Mask        | 0     |
| Drop Delay  | 44.83     | Single Cell       | Off   |
| Attenuation | Off       | Plates Voltage    | 5,500 |
| Sweet Spot  | On        | Voltage Centering | 6     |
| First Drop  | 201       | Sheath Pressure   | 70.00 |
| Target Gap  | 6         |                   |       |

### Side Stream Voltage (%)

| Far Left | Left  | Right | Far Right |
|----------|-------|-------|-----------|
| 0.00     | 41.00 | 34.00 | 0.00      |

### Neighboring Drop Charge (%)

| 2nd   | 3rd  | 4th  |
|-------|------|------|
| 18.00 | 8.00 | 0.00 |

### Acquisition Counters

|                              |           |
|------------------------------|-----------|
| Threshold Count              | 102601318 |
| Processed Events Count(evt)  | 11735806  |
| Electronic Aborts Count(evt) | 2017677   |
| Sort Elapsed Time(hh:mm:ss)  | 01:29:38  |

### Sort Counters

|                       | Left | Right |
|-----------------------|------|-------|
| Sort Rate(evt/s)      | 162  | 6     |
| Conflicts Count(evt)  | 0    | 0     |
| Conflicts Rate(evt/s) | 0    | 0     |
| Efficiency(%)         | 100  | 100   |

### Sort Layout

| Left        | Right       |
|-------------|-------------|
| Ox : 874382 | Red : 33101 |
