# Supplementary material for: Biosensor-integrated transposon mutagenesis reveals rv0158 as a coordinator of redox homeostasis in Mycobacterium tuberculosis
Source: eLife journal article supplement (doi:10.7554/elife.80218), 2023-08-29
Supplement: supp [file elife-80218-supp-v1.zip]

Experiment : 16May2016 Bac sorting  
 Specimen : Specimen\_001  
 Tube : TN40k  
 Sort Layout : Sort Layout\_006  
 Application : FACSDiva Version 8.0.1

## Sort Report

Report Date : 2016.05.16 at 15:43:10  
 Device : 4 Tube  
 User ID : Administrator  
 Cytometer : FACSARIAIII (P65828254001)

### Sort Settings

|             |           |                   |              |
|-------------|-----------|-------------------|--------------|
| Sort Setup  | 70 micron | Precision         | 4-Way Purity |
| Frequency   | 89.8      | Yield Mask        | 0            |
| Amplitude   | 6.0       | Purity Mask       | 32           |
| Phase       | 0.00      | Phase Mask        | 0            |
| Drop Delay  | 45.01     | Single Cell       | Off          |
| Attenuation | Off       | Plates Voltage    | 6,000        |
| Sweet Spot  | On        | Voltage Centering | 6            |
| First Drop  | 171       | Sheath Pressure   | 70.00        |
| Target Gap  | 6         |                   |              |

### Side Stream Voltage (%)

| Far Left | Left  | Right | Far Right |
|----------|-------|-------|-----------|
| 93.00    | 38.00 | 27.00 | 82.00     |

### Neighboring Drop Charge (%)

| 2nd   | 3rd  | 4th  |
|-------|------|------|
| 18.00 | 6.00 | 0.00 |

### Acquisition Counters

|                              |          |
|------------------------------|----------|
| Threshold Count              | 1153432  |
| Processed Events Count(evt)  | 1203671  |
| Electronic Aborts Count(evt) | 1549     |
| Sort Elapsed Time(hh:mm:ss)  | 00:26:08 |

### Sort Counters

|                       | Far Left | Left | Right | Far Right |
|-----------------------|----------|------|-------|-----------|
| Sort Rate(evt/s)      | NA       | 0    | NA    | NA        |
| Conflicts Count(evt)  | NA       | 21   | NA    | NA        |
| Conflicts Rate(evt/s) | NA       | 0    | NA    | NA        |
| Efficiency(%)         | NA       | 0    | NA    | NA        |

### Sort Layout

| Far Left | Left | Right | Far Right |
|----------|------|-------|-----------|
|----------|------|-------|-----------|

P5 : 1487
