# Supplementary material for: Biosensor-integrated transposon mutagenesis reveals rv0158 as a coordinator of redox homeostasis in Mycobacterium tuberculosis
Source: eLife journal article supplement (doi:10.7554/elife.80218), 2023-08-29
Supplement: supp [file elife-80218-supp-v1.zip]

Experiment : 27Oct2016 Sorting Macro  
Specimen : Specimen\_001  
Tube : RV mrx1  
Sort Layout : Sort Layout\_003  
Application : FACSDiva Version 8.0.1

## Sort Report

Report Date : 2016.10.27 at 16:19:34  
Device : 2 Tube  
User ID : Administrator  
Cytometer : FACSAriaIII (P65828254001)

### Sort Settings

|             |            |                   |              |
|-------------|------------|-------------------|--------------|
| Sort Setup  | 100 micron | Precision         | 4-Way Purity |
| Frequency   | 42.6       | Yield Mask        | 0            |
| Amplitude   | 5.1        | Purity Mask       | 32           |
| Phase       | 0.00       | Phase Mask        | 0            |
| Drop Delay  | 37.77      | Single Cell       | Off          |
| Attenuation | Off        | Plates Voltage    | 3,500        |
| Sweet Spot  | On         | Voltage Centering | 19           |
| First Drop  | 179        | Sheath Pressure   | 20.00        |
| Target Gap  | 10         |                   |              |

### Side Stream Voltage (%)

| Far Left | Left  | Right | Far Right |
|----------|-------|-------|-----------|
| 0.00     | 24.00 | 20.00 | 0.00      |

### Neighboring Drop Charge (%)

| 2nd   | 3rd  | 4th  |
|-------|------|------|
| 18.00 | 6.00 | 1.00 |

### Acquisition Counters

|                              |          |
|------------------------------|----------|
| Threshold Count              | 35646010 |
| Processed Events Count(evt)  | 36111821 |
| Electronic Aborts Count(evt) | 869505   |
| Sort Elapsed Time(hh:mm:ss)  | 01:49:27 |

### Sort Counters

|                       | Left | Right |
|-----------------------|------|-------|
| Sort Rate(evt/s)      | 0    | 0     |
| Conflicts Count(evt)  | 2771 | 29342 |
| Conflicts Rate(evt/s) | 0    | 0     |
| Efficiency(%)         | 0    | 0     |

### Sort Layout

| Left      | Right      |
|-----------|------------|
| Ox : 9005 | Red : 8728 |
