# Supplementary material for: Biosensor-integrated transposon mutagenesis reveals rv0158 as a coordinator of redox homeostasis in Mycobacterium tuberculosis
Source: eLife journal article supplement (doi:10.7554/elife.80218), 2023-08-29
Supplement: supp [file Figure 1-Source Data 1.xlsx]

## Sheet: Figure 1F
WT Mtb	-280.405	-281.318	-271.94	-272.624	-282.97	-280.075
Tn Lib	-280.39	-280.182	-280.301	-274.063	-277.135	-276.879
EMSHOXD Tn	-249.806	-239.073	-255.092	-253.554	-251.453	-249.43

## Sheet: Figure 1F_All
Statistics
Name	Events	% Parent	% Grandparent	% Total	FITC-A Median	V500-A Median
us:All Events	10000	***	***	100	109	112
us:P2	51	0.57	0.51	0.51	446	451
RV:P2	8906	99.83	89.06	89.06	9815	290		0.0295466		0.401102	0.407479
RV:P2	9854	99.86	98.54	98.54	7739	233		0.0301072		0.417422
RV:P2	9756	99.87	97.56	97.56	9390	274		0.02918		0.390429
RV:P2	9727	99.9	97.27	97.27	8771	260		0.0296431		0.403912
TN:P2	8360	99.87	83.6	83.6	7640	254		0.0332461		0.41632
TN:P2	9051	99.92	90.51	90.51	7098	237		0.0333897		0.419469
TN:P2	8418	99.86	84.18	84.18	7806	260		0.0333077		0.417671
TN:P2	8632	99.83	86.32	86.32	7190	240		0.0333797		0.41925
OXD:P2	8504	99.78	85.04	85.04	7506	255		0.0339728		0.432258
OXD:P2	5864	88.98	58.64	58.64	4523	208		0.0459872		0.879717	0.873062
OXD:P2	6115	90.28	61.15	61.15	5349	234		0.0437465		0.814479
OXD:P2	6889	87.65	68.89	68.89	3947	189		0.0478845		0.934956
Tube_013:P2	5991	89.17	59.91	59.91	4756	216		0.0454163		0.863096
RVCHP:P2	8662	99.88	86.62	86.62	8761	438		0.0499943
RVCHP:P2	8691	99.8	86.91	86.91	8768	426		0.0485858
RVCHP:P2	8245	99.71	82.45	82.45	9956	499		0.0501205
RVDTT:P2	9248	99.47	92.48	92.48	15496	307		0.0198116
RVDTT:P2	8216	98.93	82.16	82.16	17229	343		0.0199083
RVDTT:P2	9083	99.58	90.83	90.83	15646	320		0.0204525
RVDTT:P2	34	77.27	72.34	72.34	14421	277		0.0192081
TNCHP:P2	8884	99.91	88.84	88.84	5666	339		0.0598306
TNCHP:P2	9088	99.95	90.88	90.88	5379	322		0.0598624
TNCHP:P2	8854	99.92	88.54	88.54	5868	348		0.0593047
TNCHP:P2	8723	99.93	87.23	87.23	5462	322		0.0589528
TNDTT:P2	8010	99.9	80.1	80.1	11047	241		0.0218159
TNDTT:P2	8338	99.77	83.38	83.38	10284	216		0.0210035
TNDTT:P2	7917	99.81	79.17	79.17	10081	220		0.0218232
TNDTT:P2	8892	99.76	88.92	88.92	9456	178		0.018824
													0.0598624	1
													0.018824	0.1
