# Supplementary material for: Biosensor-integrated transposon mutagenesis reveals rv0158 as a coordinator of redox homeostasis in Mycobacterium tuberculosis
Source: eLife journal article supplement (doi:10.7554/elife.80218), 2023-08-29
Supplement: supp [file Figure 9- processed Data.xlsx]

## Sheet: Sheet1
		WT_Gluc			KO_Gluc			CO_Gluc			WT_Prop			KO_Prop			CO_Prop
		1	2	3	1	2	3	1	2	3	1	2	3	1	2	3	1	2	3
Lactate		1610000	1445000	1132000	1857000	1638000	1870000	1142000	1531000	1829000	3212000	2836000	4170000	5112000	5007000	5435000	7266000	6073000	7199000
Pyruvate		2547000	2232000	2128000	1758000	1794000	1860000	1774000	1873000	2057000	3515000	3309000	3236000	3491000	4074000	4304000	3922000	3936000	3479000
Oxaloacetate		521100	377600	553600	395400	351000	424900	327000	329700	550600	428800	274500	234800	116400	403900	204200	315300	173300	106200
Citrate		38270000	36210000	39950000	31420000	28330000	32820000	18920000	21420000	26600000	8792000	6692000	7151000	3917000	8107000	4694000	7316000	4835000	1427000
2-KG		22580000	38180000	20520000	18490000	38940000	26070000	4032000	4829000	7110000	4279000	2872000	2923000	13700000	13150000	16330000	9332000	7772000	7144000
Fumarate		4143000	3942000	3858000	3345000	3788000	3883000	3719000	3582000	4041000	4239000	3760000	4175000	4916000	4808000	5401000	6086000	6027000	5664000
Succinate		36510000	43750000	38980000	34790000	41760000	42000000	19220000	20070000	23600000	34310000	28180000	39670000	31560000	49170000	38760000	35440000	27470000	24020000
MethylCitrate		196500	215100	249700	73200	74990	102200	56760	78670	159500	7114000	3922000	4005000	2722000	6747000	2911000	2689000	1235000	361800
Malate		9550000	9835000	8170000	6901000	7631000	8555000	5106000	6858000	9744000	5535000	5313000	6940000	3126000	5318000	3470000	9059000	5891000	4394000
Glyoxylate		7763000	7851000	7180000	7544000	7406000	7688000	6940000	6793000	7233000	16300000	16850000	16730000	16570000	17970000	20380000	20070000	19420000	18440000		protein oncentrations as determined by BCA assay
																					0.191033	Glucose
																					0.174344
																					0.134765
	Lactate	8.42785e+06	7.56412e+06	5.92567e+06	1.06514e+07	9.39524e+06	1.07259e+07	8.474e+06	1.13605e+07	1.35718e+07	5.14129e+07	4.53944e+07	6.67471e+07	4.75442e+07	4.65676e+07	5.05483e+07	2.25802e+08	1.88727e+08	2.23719e+08
	Pyruvate	1.33327e+07	1.16838e+07	1.11394e+07	1.00835e+07	1.029e+07	1.06686e+07	1.31636e+07	1.38983e+07	1.52636e+07	5.62629e+07	5.29655e+07	5.17971e+07	3.24681e+07	3.78903e+07	4.00294e+07	1.21882e+08	1.22317e+08	1.08115e+08		0.0624746	Propionate
	Oxaloacetate	2.7278e+06	1.97662e+06	2.89792e+06	2.26794e+06	2.01327e+06	2.43714e+06	2.42644e+06	2.44648e+06	4.08563e+06	6.86359e+06	4.39379e+06	3.75833e+06	1.08258e+06	3.75648e+06	1.89916e+06	9.79841e+06	5.38555e+06	3.30032e+06		0.107521
	Citrate	2.00331e+08	1.89548e+08	2.09126e+08	1.80219e+08	1.62495e+08	1.88249e+08	1.40392e+08	1.58943e+08	1.9738e+08	1.40729e+08	1.07116e+08	1.14463e+08	3.64301e+07	7.53992e+07	4.36566e+07	2.27355e+08	1.50255e+08	4.43461e+07		0.0321787
	2-KG	1.18199e+08	1.9986e+08	1.07416e+08	1.06055e+08	2.23352e+08	1.49532e+08	2.99187e+07	3.58327e+07	5.27585e+07	6.84918e+07	4.59707e+07	4.6787e+07	1.27417e+08	1.22302e+08	1.51877e+08	2.90006e+08	2.41526e+08	2.2201e+08
	Fumarate	2.16873e+07	2.06351e+07	2.01954e+07	1.91863e+07	2.17272e+07	2.22721e+07	2.75962e+07	2.65796e+07	2.99855e+07	6.78516e+07	6.01845e+07	6.68272e+07	4.57213e+07	4.47168e+07	5.0232e+07	1.89131e+08	1.87298e+08	1.76017e+08
	Succinate	1.91118e+08	2.29018e+08	2.04048e+08	1.99548e+08	2.39527e+08	2.40904e+08	1.42619e+08	1.48926e+08	1.7512e+08	5.49183e+08	4.51063e+08	6.34978e+08	2.93524e+08	4.57306e+08	3.60488e+08	1.10135e+09	8.5367e+08	7.46457e+08
	MethylCitrate	1.02862e+06	1.12598e+06	1.3071e+06	419861	430128	586199	421177	583756	1.18354e+06	1.1387e+08	6.27775e+07	6.41061e+07	2.5316e+07	6.27505e+07	2.70738e+07	8.35646e+07	3.83794e+07	1.12435e+07
	Malate	4.99913e+07	5.14831e+07	4.27674e+07	3.95828e+07	4.37699e+07	4.90698e+07	3.78881e+07	5.08885e+07	7.23036e+07	8.8596e+07	8.50426e+07	1.11085e+08	2.90734e+07	4.94601e+07	3.22728e+07	2.81522e+08	1.83071e+08	1.3655e+08
	Glyoxylate	4.06369e+07	4.10975e+07	3.75851e+07	4.32709e+07	4.24793e+07	4.40968e+07	5.1497e+07	5.04062e+07	5.36712e+07	2.60906e+08	2.6971e+08	2.67789e+08	1.54109e+08	1.6713e+08	1.89544e+08	6.23705e+08	6.03505e+08	5.7305e+08
		RvG1	RvP1	KO G1	KOP1	Comp G1	Comp P1				RVP/RVG			KOP/KOG			COMPP/COMPG
	Lactate	7.30588e+06		1.02575e+07		1.11354e+07					7.0372	6.21341	9.13609	4.63506	4.53985	4.92792	20.2778	16.9484	20.0908
	Pyruvate	1.2052e+07		1.03474e+07		1.41085e+07					4.66835	4.39475	4.2978	3.13781	3.66182	3.86855	8.6389	8.66973	7.66311
	Oxaloacetate	2.53411e+06		2.23945e+06		2.98618e+06					2.70848	1.73386	1.48309	0.483414	1.67741	0.84805	3.28125	1.80349	1.1052
	Citrate	1.99668e+08		1.76988e+08		1.65572e+08					0.704815	0.536467	0.573263	0.205834	0.426014	0.246665	1.37315	0.907488	0.267836
	2-KG	1.41825e+08		1.59646e+08		3.95033e+07					0.482932	0.324136	0.329892	0.79812	0.766078	0.951335	7.3413	6.11408	5.62004
	Fumarate	2.08393e+07		2.10619e+07		2.80538e+07					3.25594	2.88803	3.20679	2.17081	2.12312	2.38498	6.74175	6.67639	6.27428
	Succinate	2.08061e+08		2.2666e+08		1.55555e+08					2.63953	2.16793	3.05188	1.295	2.01759	1.59044	7.08015	5.48791	4.79868
	MethylCitrate	1.1539e+06		478729		729492					98.683	54.4047	55.556	52.8817	131.077	56.5535	114.552	52.6112	15.4127
	Malate	4.80806e+07		4.41408e+07		5.36934e+07					1.84266	1.76875	2.31039	0.658651	1.12051	0.731132	5.24313	3.40957	2.54314
	Glyoxylate	3.97731e+07		4.32823e+07		5.18581e+07					6.55985	6.7812	6.7329	3.56056	3.86139	4.37925	12.0271	11.6376	11.0503
	Lactate	1.15357	1.03535	0.811082	1.0384	0.915937	1.04567	0.760995	1.02021	1.21879
	Pyruvate	1.10627	0.969451	0.92428	0.974501	0.994457	1.03104	0.933029	0.985098	1.08187
	Oxaloacetate	1.07643	0.780004	1.14357	1.01272	0.899001	1.08828	0.812557	0.819266	1.36818
	Citrate	1.00332	0.949314	1.04737	1.01826	0.918116	1.06363	0.847924	0.959964	1.19211
	2-KG	0.833415	1.4092	0.757382	0.664311	1.39904	0.936647	0.757373	0.907082	1.33555
	Fumarate	1.04069	0.990203	0.969103	0.910948	1.03159	1.05746	0.983689	0.947452	1.06886
	Succinate	0.918568	1.10072	0.980711	0.880388	1.05677	1.06284	0.916839	0.957386	1.12578
	MethylCitrate	0.891426	0.975805	1.13277	0.877032	0.898478	1.22449	0.577357	0.800224	1.62242
	Malate	1.03974	1.07077	0.889494	0.896738	0.991597	1.11166	0.705638	0.947761	1.3466
	Glyoxylate	1.02172	1.0333	0.944986	0.999735	0.981447	1.01882	0.993036	0.972002	1.03496
