# Supplementary material for: Biosensor-integrated transposon mutagenesis reveals rv0158 as a coordinator of redox homeostasis in Mycobacterium tuberculosis
Source: eLife journal article supplement (doi:10.7554/elife.80218), 2023-08-29
Supplement: supp [file q1 and q3 masses.xlsx]

## Sheet: Sheet1
		Parent ion mass (Q1)	Product ion mass (Q3)
	Pyruvate	299.1	91.1
	Fumarate	327.1	91.1
	Succinate	329.1	91.1
	Malate	345	91.1
	Oxaloacetate	448	324.9
	α-Ketoglutarate	462	338.9
	Citrate/Isocitrate	508	91.1
	Glyoxylate	285	91.1
	Methylcitrate	522	91.1
	Lactate	196	91.1
