# Supplementary material for: Biosensor-integrated transposon mutagenesis reveals rv0158 as a coordinator of redox homeostasis in Mycobacterium tuberculosis
Source: eLife journal article supplement (doi:10.7554/elife.80218), 2023-08-29
Supplement: supp [file raw data.xlsx]

## Sheet: Sheet1
Sample Name	Injection Volume	Component Name	Area	Height	Retention Time	Width at 50%	Signal / Noise	Width at 10%
Sample21	10	MG_1	N/A	N/A	N/A	N/A	N/A	N/A
Sample21	10	MG_2	1038	108.4	10	0.17	21.7	0.25
Sample21	10	Lac_1	23860	1066	5.79	0.42	70.9	0.59
Sample21	10	Lac_2	1117	103.3	6.43	0.18	7.2	0.26
Sample21	10	Lac_3	1531	146.8	6.58	0.19	16	0.23
Sample21	10	Pyr_1	2806	261.2	7.48	0.19	24.4	0.23
Sample21	10	Pyr_2	7632	356	7.6	0.41	37.7	0.52
Sample21	10	OAA_1	3488	371.6	7.99	0.15	74.5	0.2
Sample21	10	OAA_2	685.3	50.86	7.5	0.21	10.2	0.35
Sample21	10	Cit_1	1811	119.7	7.41	0.31	24	0.36
Sample21	10	Cit_2	2247	207.5	7.34	0.16	41.6	0.35
Sample21	10	Cit_3	264.1	42.88	7.13	0.1	8.6	0.19
Sample21	10	2-KG_1	8533	809.2	7.96	0.17	162.3	0.33
Sample21	10	2-KG_2	2110	243.6	7.88	0.12	48.9	0.28
Sample21	10	Fumarate	2030	192.1	7.46	0.21	37.3	0.23
Sample21	10	Succinate	5449	408.6	6.8	0.28	53.5	0.28
Sample21	10	Fum_2	1192	167.7	6.1	0.09	18.2	0.17
Sample21	10	Suc_2	3503	358.8	7.18	0.2	45.6	0.2
Sample21	10	MethylCitrate	3076	236.6	7.57	0.2	47.4	0.46
Sample21	10	Malate	1059	117.7	6.92	0.12	15.3	0.27
Sample21	10	Glyoxylate_1	1921	132.5	7.42	0.27	23.5	0.36
Sample21	10	Glyoxylate_2	14170	866.1	7.45	0.32	52.8	0.41
Sample19	1	MG_1	4410000	383800	9.83	0.15	4681.1	0.36
Sample19	1	MG_2	115300	9845	9.84	0.16	1974.2	0.36
Sample19	1	Lac_1	55870000	6170000	6.15	0.14	24380.4	0.25
Sample19	1	Lac_2	2918000	336800	6.14	0.13	8250.3	0.25
Sample19	1	Lac_3	4428000	508100	6.14	0.13	20577.9	0.25
Sample19	1	Pyr_1	11220000	1063000	7.94	0.15	13346.1	0.33
Sample19	1	Pyr_2	557300	52140	7.94	0.15	2222.9	0.34
Sample19	1	OAA_1	293500	27260	7.79	0.14	1056.3	0.36
Sample19	1	OAA_2	170100	16960	7.79	0.14	2385.9	0.31
Sample19	1	Cit_1	12240000	1021000	7.34	0.19	46777	0.36
Sample19	1	Cit_2	11730000	995500	7.35	0.17	65064.4	0.35
Sample19	1	Cit_3	458800	47720	7.36	0.14	9569.2	0.29
Sample19	1	2-KG_1	33830000	2932000	7.9	0.16	33010.7	0.36
Sample19	1	2-KG_2	18480000	1450000	7.89	0.16	70800.9	0.45
Sample19	1	Fumarate	922100	68040	7.79	0.17	2687.3	0.47
Sample19	1	Succinate	121400000	11430000	6.86	0.16	42104.8	0.29
Sample19	1	Fum_2	1522000	147600	6.33	0.15	1253.7	0.3
Sample19	1	Suc_2	114600000	11110000	6.86	0.16	43228.6	0.29
Sample19	1	MethylCitrate	39790000	3982000	7.53	0.14	132078	0.3
Sample19	1	Malate	35960000	5069000	6.63	0.11	23036.7	0.22
Sample19	1	Glyoxylate_1	8274000	831300	7.49	0.14	13950.2	0.3
Sample19	1	Glyoxylate_2	121900000	10800000	7.5	0.17	25068.4	0.33
Sample1	10	MG_1	638700	42650	9.9	0.2	136.1	0.52
Sample1	10	MG_2	21480	1656	9.91	0.19	332.2	0.42
Sample1	10	Lac_1	1610000	186200	6.14	0.13	937.3	0.25
Sample1	10	Lac_2	84030	8701	6.14	0.14	391.1	0.29
Sample1	10	Lac_3	114300	12990	6.14	0.13	374	0.26
Sample1	10	Pyr_1	2547000	159400	7.96	0.43	3252.2	0.67
Sample1	10	Pyr_2	102900	8657	7.97	0.15	532.3	0.5
Sample1	10	OAA_1	821300	89160	7.82	0.13	1016.9	0.27
Sample1	10	OAA_2	521100	57570	7.82	0.13	4367.7	0.27
Sample1	10	Cit_1	38270000	4342000	7.38	0.13	50855.9	0.27
Sample1	10	Cit_2	37870000	4184000	7.38	0.13	49364.6	0.28
Sample1	10	Cit_3	2036000	234000	7.38	0.13	46930.6	0.27
Sample1	10	2-KG_1	22580000	1975000	7.92	0.16	31502.2	0.37
Sample1	10	2-KG_2	10260000	937500	7.92	0.15	22152.3	0.36
Sample1	10	Fumarate	4143000	354100	7.82	0.16	11208	0.37
Sample1	10	Succinate	36510000	4087000	6.88	0.13	27845.2	0.26
Sample1	10	Fum_2	545300	41910	6.13	0.19	228.7	0.39
Sample1	10	Suc_2	32890000	3723000	6.88	0.13	10595.2	0.26
Sample1	10	MethylCitrate	196500	18800	7.57	0.14	1475.2	0.41
Sample1	10	Malate	9550000	1371000	6.65	0.09	4469.3	0.21
Sample1	10	Glyoxylate_1	448900	42590	7.5	0.15	1335.7	0.32
Sample1	10	Glyoxylate_2	7763000	742800	7.5	0.15	2465.4	0.32
Sample2	10	MG_1	749000	49430	9.89	0.2	177.8	0.54
Sample2	10	MG_2	27130	2047	9.9	0.19	410.4	0.39
Sample2	10	Lac_1	1445000	159500	6.16	0.14	846.6	0.27
Sample2	10	Lac_2	80000	8080	6.16	0.15	342.7	0.29
Sample2	10	Lac_3	112400	12350	6.16	0.14	363.2	0.27
Sample2	10	Pyr_1	2232000	134600	7.94	0.44	2687.7	0.68
Sample2	10	Pyr_2	83230	7030	7.97	0.15	398.4	0.48
Sample2	10	OAA_1	623300	68050	7.82	0.13	1093.5	0.27
Sample2	10	OAA_2	377600	41280	7.82	0.14	2420.3	0.27
Sample2	10	Cit_1	36210000	4081000	7.39	0.13	37109.9	0.27
Sample2	10	Cit_2	34480000	3801000	7.39	0.13	47387.6	0.28
Sample2	10	Cit_3	1894000	217500	7.39	0.13	38040.1	0.27
Sample2	10	2-KG_1	38180000	3418000	7.92	0.16	36568.6	0.35
Sample2	10	2-KG_2	17560000	1585000	7.91	0.15	33929	0.35
Sample2	10	Fumarate	3942000	342200	7.82	0.16	8715.6	0.37
Sample2	10	Succinate	43750000	4824000	6.89	0.14	22824.6	0.27
Sample2	10	Fum_2	607700	52330	6.17	0.16	307.5	0.38
Sample2	10	Suc_2	39780000	4425000	6.89	0.13	12155.4	0.27
Sample2	10	MethylCitrate	215100	21950	7.58	0.14	1076.2	0.32
Sample2	10	Malate	9835000	1447000	6.66	0.09	5446.8	0.19
Sample2	10	Glyoxylate_1	458000	44890	7.51	0.15	1069.4	0.31
Sample2	10	Glyoxylate_2	7851000	768100	7.5	0.15	1607.3	0.31
Sample3	10	MG_1	882500	61440	9.88	0.19	216	0.49
Sample3	10	MG_2	31250	2434	9.89	0.18	488.2	0.4
Sample3	10	Lac_1	1132000	125100	6.13	0.14	717.1	0.26
Sample3	10	Lac_2	58500	5846	6.12	0.16	265.6	0.29
Sample3	10	Lac_3	79790	8437	6.13	0.14	296.1	0.28
Sample3	10	Pyr_1	2128000	134200	7.94	0.43	2929.2	0.67
Sample3	10	Pyr_2	78050	7085	7.96	0.14	421.7	0.45
Sample3	10	OAA_1	909500	98820	7.81	0.13	1109.5	0.27
Sample3	10	OAA_2	553600	60530	7.81	0.14	3547	0.27
Sample3	10	Cit_1	39950000	4540000	7.38	0.13	43718.1	0.27
Sample3	10	Cit_2	38030000	4221000	7.38	0.13	41928.2	0.27
Sample3	10	Cit_3	2080000	241800	7.38	0.12	32838.1	0.26
Sample3	10	2-KG_1	20520000	1875000	7.92	0.15	29714	0.36
Sample3	10	2-KG_2	9390000	878200	7.91	0.15	17496.6	0.34
Sample3	10	Fumarate	3858000	336100	7.81	0.16	9401.9	0.37
Sample3	10	Succinate	38980000	4408000	6.87	0.13	23721.4	0.26
Sample3	10	Fum_2	595600	46070	6.13	0.19	249.4	0.39
Sample3	10	Suc_2	35510000	4105000	6.87	0.13	11520.8	0.26
Sample3	10	MethylCitrate	249700	23850	7.57	0.14	1335.8	0.33
Sample3	10	Malate	8170000	1168000	6.65	0.09	4606.7	0.2
Sample3	10	Glyoxylate_1	412900	40580	7.49	0.15	1181.4	0.31
Sample3	10	Glyoxylate_2	7180000	711600	7.49	0.15	1536.8	0.31
Sample4	10	MG_1	739800	52680	9.88	0.2	179.8	0.49
Sample4	10	MG_2	28410	2072	9.89	0.2	415.5	0.44
Sample4	10	Lac_1	1857000	212100	6.15	0.13	1207.7	0.25
Sample4	10	Lac_2	98020	10300	6.14	0.14	453.3	0.28
Sample4	10	Lac_3	137000	15480	6.15	0.14	429.2	0.26
Sample4	10	Pyr_1	1758000	111100	7.95	0.42	2438.6	0.66
Sample4	10	Pyr_2	73230	6114	7.96	0.15	421.8	0.46
Sample4	10	OAA_1	667800	70280	7.81	0.13	972.5	0.28
Sample4	10	OAA_2	395400	43350	7.81	0.13	2828.8	0.27
Sample4	10	Cit_1	31420000	3608000	7.38	0.13	30620	0.27
Sample4	10	Cit_2	30500000	3438000	7.38	0.13	33882.8	0.27
Sample4	10	Cit_3	1631000	189200	7.38	0.12	34250.4	0.26
Sample4	10	2-KG_1	18490000	1664000	7.92	0.15	25129.3	0.36
Sample4	10	2-KG_2	8384000	774300	7.92	0.15	16943.1	0.35
Sample4	10	Fumarate	3345000	286300	7.81	0.16	8772.1	0.37
Sample4	10	Succinate	34790000	3917000	6.88	0.13	22425.3	0.26
Sample4	10	Fum_2	610800	48700	6.13	0.18	272	0.38
Sample4	10	Suc_2	31350000	3505000	6.87	0.13	10259.9	0.26
Sample4	10	MethylCitrate	73200	6465	7.57	0.16	501.6	0.4
Sample4	10	Malate	6901000	1015000	6.65	0.09	2870.9	0.2
Sample4	10	Glyoxylate_1	446100	43570	7.5	0.15	1389.5	0.31
Sample4	10	Glyoxylate_2	7544000	739500	7.5	0.15	2023.2	0.31
Sample5	10	MG_1	1030000	71030	9.88	0.19	263	0.52
Sample5	10	MG_2	33150	2736	9.89	0.17	548.6	0.4
Sample5	10	Lac_1	1638000	181600	6.15	0.14	947.3	0.26
Sample5	10	Lac_2	87320	8619	6.14	0.16	420.6	0.29
Sample5	10	Lac_3	121400	13200	6.15	0.14	458.6	0.26
Sample5	10	Pyr_1	1794000	111800	7.94	0.43	2382.4	0.67
Sample5	10	Pyr_2	74310	6520	7.96	0.14	391.1	0.49
Sample5	10	OAA_1	579500	64110	7.82	0.13	869.2	0.27
Sample5	10	OAA_2	351000	38460	7.82	0.13	2477.4	0.27
Sample5	10	Cit_1	28330000	3337000	7.38	0.12	28980.7	0.26
Sample5	10	Cit_2	27750000	3216000	7.38	0.12	43568.8	0.26
Sample5	10	Cit_3	1466000	173900	7.38	0.12	34863.2	0.25
Sample5	10	2-KG_1	38940000	3468000	7.9	0.16	43716.2	0.35
Sample5	10	2-KG_2	18340000	1659000	7.9	0.16	26873.1	0.35
Sample5	10	Fumarate	3788000	331800	7.81	0.16	8622.8	0.36
Sample5	10	Succinate	41760000	4616000	6.88	0.14	26924.2	0.26
Sample5	10	Fum_2	554500	47180	6.16	0.16	268	0.38
Sample5	10	Suc_2	37640000	4187000	6.88	0.13	14287	0.26
Sample5	10	MethylCitrate	74990	6837	7.57	0.15	493.9	0.38
Sample5	10	Malate	7631000	1127000	6.65	0.1	5502.5	0.19
Sample5	10	Glyoxylate_1	435900	41980	7.5	0.15	1020.3	0.32
Sample5	10	Glyoxylate_2	7406000	721900	7.5	0.15	1475.1	0.31
Sample6	10	MG_1	703800	47600	9.88	0.2	140.2	0.54
Sample6	10	MG_2	23790	1872	9.88	0.17	375.4	0.4
Sample6	10	Lac_1	1870000	211800	6.15	0.14	1249.4	0.26
Sample6	10	Lac_2	99460	10200	6.14	0.15	463.2	0.29
Sample6	10	Lac_3	133300	14760	6.15	0.14	490.3	0.26
Sample6	10	Pyr_1	1860000	112600	7.93	0.43	2366.7	0.67
Sample6	10	Pyr_2	75350	6126	7.96	0.15	390.3	0.51
Sample6	10	OAA_1	669500	75540	7.81	0.13	1090.9	0.26
Sample6	10	OAA_2	424900	47530	7.81	0.13	3316.7	0.27
Sample6	10	Cit_1	32820000	3719000	7.38	0.13	33085.1	0.27
Sample6	10	Cit_2	32230000	3558000	7.38	0.13	46634.6	0.28
Sample6	10	Cit_3	1711000	197800	7.38	0.12	33828.2	0.26
Sample6	10	2-KG_1	26070000	2345000	7.91	0.15	28271.7	0.36
Sample6	10	2-KG_2	12150000	1120000	7.91	0.15	20892.2	0.35
Sample6	10	Fumarate	3883000	338000	7.81	0.16	8888.2	0.36
Sample6	10	Succinate	42000000	4568000	6.88	0.14	26124.4	0.27
Sample6	10	Fum_2	588300	49620	6.15	0.17	305	0.38
Sample6	10	Suc_2	38560000	4264000	6.88	0.13	11543.7	0.27
Sample6	10	MethylCitrate	102200	9111	7.57	0.15	686.8	0.43
Sample6	10	Malate	8555000	1294000	6.65	0.09	5738.5	0.19
Sample6	10	Glyoxylate_1	445600	42030	7.5	0.16	1058	0.32
Sample6	10	Glyoxylate_2	7688000	736900	7.5	0.15	1385.1	0.32
Sample7	10	MG_1	421200	27020	9.88	0.22	87.4	0.59
Sample7	10	MG_2	13180	1078	9.89	0.18	216.2	0.41
Sample7	10	Lac_1	1142000	129900	6.15	0.14	812.5	0.26
Sample7	10	Lac_2	62120	6553	6.14	0.14	323	0.28
Sample7	10	Lac_3	82530	9297	6.15	0.14	241.7	0.26
Sample7	10	Pyr_1	1774000	112000	7.94	0.42	2818.2	0.67
Sample7	10	Pyr_2	77000	6268	7.96	0.14	488.2	0.53
Sample7	10	OAA_1	684100	65630	7.81	0.15	965.4	0.33
Sample7	10	OAA_2	327000	35700	7.81	0.13	2665.3	0.27
Sample7	10	Cit_1	18920000	2160000	7.38	0.13	31386.2	0.27
Sample7	10	Cit_2	18930000	2144000	7.38	0.13	32834.3	0.27
Sample7	10	Cit_3	957300	110600	7.38	0.13	22176	0.26
Sample7	10	2-KG_1	4032000	323700	7.9	0.17	10945.2	0.39
Sample7	10	2-KG_2	1660000	144800	7.9	0.16	4991.1	0.37
Sample7	10	Fumarate	3719000	318100	7.81	0.16	9639.3	0.37
Sample7	10	Succinate	19220000	2182000	6.88	0.13	23246.3	0.26
Sample7	10	Fum_2	520200	43600	6.14	0.17	314.4	0.38
Sample7	10	Suc_2	17280000	1986000	6.87	0.13	7841.9	0.26
Sample7	10	MethylCitrate	56760	5378	7.57	0.15	503.4	0.38
Sample7	10	Malate	5106000	733000	6.65	0.09	2567.7	0.2
Sample7	10	Glyoxylate_1	405600	39710	7.49	0.15	1099.4	0.31
Sample7	10	Glyoxylate_2	6940000	671900	7.49	0.15	1946.2	0.31
Sample8	10	MG_1	517000	31870	9.88	0.22	114.1	0.6
Sample8	10	MG_2	14280	1240	9.87	0.17	248.7	0.36
Sample8	10	Lac_1	1531000	174600	6.15	0.13	1073.3	0.26
Sample8	10	Lac_2	82760	8745	6.15	0.14	421	0.28
Sample8	10	Lac_3	114100	12930	6.15	0.14	358.5	0.26
Sample8	10	Pyr_1	1873000	120200	7.95	0.41	2756.4	0.66
Sample8	10	Pyr_2	79970	6696	7.95	0.14	515.8	0.47
Sample8	10	OAA_1	579800	60150	7.81	0.14	881	0.29
Sample8	10	OAA_2	329700	35330	7.81	0.14	2608	0.28
Sample8	10	Cit_1	21420000	2391000	7.38	0.13	36829.5	0.27
Sample8	10	Cit_2	21390000	2387000	7.38	0.13	39656.8	0.27
Sample8	10	Cit_3	1101000	124100	7.38	0.13	24892.4	0.27
Sample8	10	2-KG_1	4829000	389500	7.9	0.17	11644.6	0.39
Sample8	10	2-KG_2	2042000	179700	7.91	0.16	6501.1	0.37
Sample8	10	Fumarate	3582000	307500	7.81	0.16	9331.9	0.37
Sample8	10	Succinate	20070000	2273000	6.88	0.13	23321.3	0.26
Sample8	10	Fum_2	545500	46830	6.14	0.17	363.7	0.37
Sample8	10	Suc_2	18010000	2017000	6.88	0.13	6859.3	0.26
Sample8	10	MethylCitrate	78670	6471	7.56	0.14	640.6	0.46
Sample8	10	Malate	6858000	1021000	6.65	0.09	4364.9	0.2
Sample8	10	Glyoxylate_1	391700	37880	7.49	0.15	1149.8	0.32
Sample8	10	Glyoxylate_2	6793000	653100	7.49	0.15	1712.3	0.32
Sample9	10	MG_1	554600	35020	9.88	0.22	111.3	0.56
Sample9	10	MG_2	17550	1310	9.88	0.19	262.6	0.45
Sample9	10	Lac_1	1829000	208400	6.15	0.13	1222.1	0.26
Sample9	10	Lac_2	99290	10020	6.15	0.15	506	0.29
Sample9	10	Lac_3	131300	15220	6.15	0.13	477.4	0.25
Sample9	10	Pyr_1	2057000	133700	7.95	0.41	2712.1	0.66
Sample9	10	Pyr_2	88250	7579	7.96	0.14	475	0.49
Sample9	10	OAA_1	972600	100200	7.81	0.14	1411.3	0.29
Sample9	10	OAA_2	550600	60310	7.81	0.13	3271.7	0.27
Sample9	10	Cit_1	26600000	2958000	7.38	0.13	38675.7	0.27
Sample9	10	Cit_2	25990000	2849000	7.38	0.13	36703.6	0.28
Sample9	10	Cit_3	1354000	153600	7.38	0.13	30794.3	0.27
Sample9	10	2-KG_1	7110000	603500	7.91	0.16	14049.6	0.38
Sample9	10	2-KG_2	3115000	279700	7.91	0.16	6188	0.36
Sample9	10	Fumarate	4041000	351300	7.81	0.16	9917.5	0.37
Sample9	10	Succinate	23600000	2610000	6.87	0.13	18836.5	0.27
Sample9	10	Fum_2	637900	53230	6.14	0.17	400.2	0.38
Sample9	10	Suc_2	21380000	2383000	6.87	0.13	6658.5	0.27
Sample9	10	MethylCitrate	159500	11620	7.57	0.15	933	0.63
Sample9	10	Malate	9744000	1492000	6.65	0.09	5147	0.2
Sample9	10	Glyoxylate_1	426500	40940	7.49	0.15	1062	0.32
Sample9	10	Glyoxylate_2	7233000	696100	7.49	0.15	1490.2	0.32
Sample10	10	MG_1	667600	42740	9.87	0.23	129.8	0.54
Sample10	10	MG_2	23310	1879	9.87	0.16	376.9	0.44
Sample10	10	Lac_1	3212000	319200	6.08	0.16	1576.1	0.28
Sample10	10	Lac_2	391100	42490	6.06	0.14	1582.8	0.27
Sample10	10	Lac_3	216100	20920	6.08	0.16	739	0.3
Sample10	10	Pyr_1	3515000	248100	7.95	0.14	4424.4	0.65
Sample10	10	Pyr_2	153800	13780	7.95	0.14	863.8	0.45
Sample10	10	OAA_1	1234000	97290	7.81	0.17	1448.1	0.44
Sample10	10	OAA_2	428800	46300	7.8	0.14	2385	0.27
Sample10	10	Cit_1	8792000	990900	7.37	0.13	21804.1	0.26
Sample10	10	Cit_2	8826000	987300	7.37	0.13	29920.4	0.27
Sample10	10	Cit_3	434500	49980	7.37	0.13	10023.1	0.26
Sample10	10	2-KG_1	4279000	343100	7.91	0.16	6781.1	0.41
Sample10	10	2-KG_2	1744000	158800	7.91	0.15	4630.2	0.36
Sample10	10	Fumarate	4239000	369700	7.81	0.16	7734.4	0.37
Sample10	10	Succinate	34310000	3880000	6.86	0.13	23137	0.26
Sample10	10	Fum_2	595400	48110	6.12	0.18	291.3	0.38
Sample10	10	Suc_2	32870000	3642000	6.87	0.13	10824.1	0.27
Sample10	10	MethylCitrate	7114000	565200	7.54	0.19	14606.4	0.39
Sample10	10	Malate	5535000	830200	6.64	0.09	1448.3	0.2
Sample10	10	Glyoxylate_1	943600	90790	7.5	0.15	1483.6	0.32
Sample10	10	Glyoxylate_2	16300000	1566000	7.5	0.15	2488.7	0.32
Sample11	10	MG_1	765600	51040	9.86	0.2	171.2	0.53
Sample11	10	MG_2	27690	2171	9.86	0.18	423.4	0.41
Sample11	10	Lac_1	2836000	271800	6.1	0.17	1488.7	0.29
Sample11	10	Lac_2	298100	31550	6.08	0.14	1279.4	0.27
Sample11	10	Lac_3	193500	18370	6.1	0.17	689	0.29
Sample11	10	Pyr_1	3309000	233000	7.95	0.14	4024.2	0.64
Sample11	10	Pyr_2	147800	12650	7.95	0.15	750.3	0.44
Sample11	10	OAA_1	554500	49950	7.81	0.15	795.3	0.33
Sample11	10	OAA_2	274500	29610	7.8	0.13	1900.3	0.28
Sample11	10	Cit_1	6692000	755000	7.37	0.13	24717.8	0.27
Sample11	10	Cit_2	6673000	754400	7.37	0.13	32342.9	0.27
Sample11	10	Cit_3	331200	37790	7.37	0.13	7577.9	0.26
Sample11	10	2-KG_1	2872000	222700	7.91	0.17	6998.9	0.42
Sample11	10	2-KG_2	1122000	100700	7.91	0.15	3873.5	0.37
Sample11	10	Fumarate	3760000	321300	7.8	0.16	8263.1	0.38
Sample11	10	Succinate	28180000	3195000	6.87	0.13	20530	0.26
Sample11	10	Fum_2	432300	36420	6.12	0.17	216.9	0.37
Sample11	10	Suc_2	27800000	3105000	6.87	0.13	11020.7	0.27
Sample11	10	MethylCitrate	3922000	346300	7.55	0.16	10241.1	0.37
Sample11	10	Malate	5313000	771500	6.64	0.1	1415.3	0.21
Sample11	10	Glyoxylate_1	948300	92910	7.5	0.15	1827.1	0.31
Sample11	10	Glyoxylate_2	16850000	1669000	7.5	0.15	3405.9	0.31
Sample12	10	MG_1	1041000	71550	9.86	0.2	303.3	0.49
Sample12	10	MG_2	37810	2965	9.87	0.18	530.8	0.42
Sample12	10	Lac_1	4170000	415300	6.1	0.16	1989.7	0.28
Sample12	10	Lac_2	495200	56340	6.08	0.13	1678.6	0.26
Sample12	10	Lac_3	285400	27840	6.1	0.16	863.6	0.29
Sample12	10	Pyr_1	3236000	220000	7.95	0.14	3528.9	0.65
Sample12	10	Pyr_2	131600	11750	7.96	0.15	732.9	0.38
Sample12	10	OAA_1	392400	39930	7.81	0.14	734.3	0.28
Sample12	10	OAA_2	234800	25140	7.81	0.14	1687.2	0.28
Sample12	10	Cit_1	7151000	803700	7.38	0.13	18172.2	0.27
Sample12	10	Cit_2	7279000	816000	7.38	0.13	41301.4	0.26
Sample12	10	Cit_3	359600	41360	7.37	0.13	8294.7	0.26
Sample12	10	2-KG_1	2923000	249300	7.9	0.16	5760.4	0.38
Sample12	10	2-KG_2	1325000	117500	7.9	0.16	4347	0.36
Sample12	10	Fumarate	4175000	357200	7.81	0.16	8197	0.38
Sample12	10	Succinate	39670000	4513000	6.87	0.13	26540.4	0.26
Sample12	10	Fum_2	575000	51150	6.14	0.15	333.6	0.37
Sample12	10	Suc_2	38530000	4370000	6.87	0.13	14585.5	0.26
Sample12	10	MethylCitrate	4005000	356300	7.56	0.15	11055.9	0.37
Sample12	10	Malate	6940000	996200	6.65	0.1	2214.7	0.21
Sample12	10	Glyoxylate_1	944600	93820	7.5	0.15	2350.2	0.31
Sample12	10	Glyoxylate_2	16730000	1633000	7.5	0.15	3632	0.31
Sample13	10	MG_1	721000	47820	9.86	0.2	245.4	0.55
Sample13	10	MG_2	22460	1882	9.86	0.16	377.5	0.39
Sample13	10	Lac_1	5112000	522200	6.08	0.15	2288.9	0.28
Sample13	10	Lac_2	626900	72360	6.07	0.13	2235.4	0.26
Sample13	10	Lac_3	342200	34210	6.08	0.16	1013.3	0.29
Sample13	10	Pyr_1	3491000	219700	7.95	0.14	3756.1	0.75
Sample13	10	Pyr_2	127700	11170	7.95	0.14	589.1	0.46
Sample13	10	OAA_1	200100	18920	7.82	0.16	293.9	0.32
Sample13	10	OAA_2	116400	11350	7.82	0.16	878.2	0.29
Sample13	10	Cit_1	3917000	449800	7.37	0.13	13189.9	0.26
Sample13	10	Cit_2	4037000	456500	7.37	0.13	35377.4	0.26
Sample13	10	Cit_3	200000	22560	7.37	0.13	4523.7	0.27
Sample13	10	2-KG_1	13700000	1214000	7.89	0.15	18506.9	0.37
Sample13	10	2-KG_2	6139000	565900	7.89	0.15	17927.5	0.35
Sample13	10	Fumarate	4916000	430000	7.8	0.16	9394.2	0.37
Sample13	10	Succinate	31560000	3531000	6.87	0.13	23801.1	0.26
Sample13	10	Fum_2	523600	46560	6.14	0.14	281.7	0.43
Sample13	10	Suc_2	29120000	3238000	6.87	0.13	13004.8	0.27
Sample13	10	MethylCitrate	2722000	267300	7.56	0.14	6695.7	0.32
Sample13	10	Malate	3126000	482000	6.65	0.1	843.5	0.21
Sample13	10	Glyoxylate_1	928700	88750	7.5	0.15	2113.2	0.32
Sample13	10	Glyoxylate_2	16570000	1592000	7.5	0.15	3518.1	0.32
Sample14	10	MG_1	700200	47430	9.86	0.2	189	0.54
Sample14	10	MG_2	27730	2292	9.86	0.16	459.7	0.41
Sample14	10	Lac_1	5007000	555200	6.08	0.14	2233.5	0.27
Sample14	10	Lac_2	663200	78400	6.07	0.13	2397.8	0.25
Sample14	10	Lac_3	332900	35340	6.08	0.15	1103	0.28
Sample14	10	Pyr_1	4074000	259600	7.94	0.14	3938.2	0.67
Sample14	10	Pyr_2	154300	13800	7.95	0.14	729.7	0.44
Sample14	10	OAA_1	606800	66410	7.8	0.14	733.2	0.27
Sample14	10	OAA_2	403900	42150	7.81	0.14	2404.1	0.28
Sample14	10	Cit_1	8107000	922300	7.37	0.13	20308.5	0.26
Sample14	10	Cit_2	8414000	946200	7.37	0.13	47117.1	0.26
Sample14	10	Cit_3	420100	48370	7.37	0.13	9698.7	0.26
Sample14	10	2-KG_1	13150000	1154000	7.89	0.15	15318.3	0.37
Sample14	10	2-KG_2	6051000	556800	7.89	0.15	14304.6	0.35
Sample14	10	Fumarate	4808000	424200	7.8	0.16	8101.4	0.36
Sample14	10	Succinate	49170000	5428000	6.87	0.13	30098.2	0.27
Sample14	10	Fum_2	564200	51060	6.14	0.15	304.1	0.35
Sample14	10	Suc_2	45430000	5085000	6.87	0.13	12465.1	0.27
Sample14	10	MethylCitrate	6747000	561000	7.55	0.17	13405.2	0.38
Sample14	10	Malate	5318000	735800	6.65	0.1	1586.7	0.29
Sample14	10	Glyoxylate_1	1010000	95570	7.5	0.15	1568.6	0.32
Sample14	10	Glyoxylate_2	17970000	1724000	7.5	0.15	2218.2	0.32
Sample15	10	MG_1	409300	25260	9.86	0.22	103.7	0.62
Sample15	10	MG_2	14520	1161	9.86	0.16	232.9	0.43
Sample15	10	Lac_1	5435000	604700	6.08	0.14	2425.7	0.27
Sample15	10	Lac_2	712700	85420	6.08	0.13	2736.8	0.25
Sample15	10	Lac_3	361300	39190	6.08	0.14	957.6	0.27
Sample15	10	Pyr_1	4304000	266700	7.93	0.42	4351.9	0.74
Sample15	10	Pyr_2	155500	13820	7.94	0.14	689.8	0.47
Sample15	10	OAA_1	321300	31340	7.81	0.16	408.5	0.32
Sample15	10	OAA_2	204200	20320	7.81	0.15	1409.3	0.28
Sample15	10	Cit_1	4694000	534700	7.37	0.13	13547	0.26
Sample15	10	Cit_2	4789000	540500	7.37	0.13	35068.1	0.27
Sample15	10	Cit_3	244200	27520	7.37	0.13	5519.2	0.26
Sample15	10	2-KG_1	16330000	1423000	7.89	0.15	21911.4	0.38
Sample15	10	2-KG_2	7269000	665300	7.89	0.15	19643.1	0.35
Sample15	10	Fumarate	5401000	472900	7.8	0.16	8335.6	0.36
Sample15	10	Succinate	38760000	4246000	6.87	0.13	23240	0.27
Sample15	10	Fum_2	549600	47840	6.14	0.15	263	0.42
Sample15	10	Suc_2	35830000	3917000	6.87	0.14	10589.6	0.27
Sample15	10	MethylCitrate	2911000	283500	7.56	0.14	7892.7	0.32
Sample15	10	Malate	3470000	533300	6.65	0.1	956.5	0.21
Sample15	10	Glyoxylate_1	1159000	109600	7.5	0.15	1852	0.32
Sample15	10	Glyoxylate_2	20380000	1941000	7.5	0.15	3253.4	0.32
Sample16	10	MG_1	639200	42550	9.85	0.2	176.3	0.55
Sample16	10	MG_2	21320	1734	9.86	0.16	347.7	0.42
Sample16	10	Lac_1	7266000	724600	6.09	0.16	3096.7	0.28
Sample16	10	Lac_2	837100	91650	6.07	0.14	2792.6	0.26
Sample16	10	Lac_3	502800	49710	6.09	0.16	1379.7	0.28
Sample16	10	Pyr_1	3922000	243000	7.93	0.42	4239.9	0.67
Sample16	10	Pyr_2	150400	13490	7.94	0.14	659.4	0.42
Sample16	10	OAA_1	526200	55750	7.8	0.14	979.3	0.28
Sample16	10	OAA_2	315300	33580	7.8	0.14	2101.7	0.27
Sample16	10	Cit_1	7316000	840500	7.37	0.13	26200.3	0.26
Sample16	10	Cit_2	7586000	869700	7.36	0.13	46849.8	0.26
Sample16	10	Cit_3	381600	44230	7.36	0.13	8869	0.26
Sample16	10	2-KG_1	9332000	866500	7.88	0.15	17797.7	0.34
Sample16	10	2-KG_2	4373000	407100	7.88	0.15	12725.7	0.35
Sample16	10	Fumarate	6086000	532500	7.8	0.16	8074.1	0.36
Sample16	10	Succinate	35440000	3946000	6.86	0.13	26369	0.26
Sample16	10	Fum_2	518400	45220	6.14	0.15	257.3	0.36
Sample16	10	Suc_2	31930000	3530000	6.86	0.13	11749	0.26
Sample16	10	MethylCitrate	2689000	220200	7.54	0.18	8336.7	0.38
Sample16	10	Malate	9059000	1328000	6.64	0.1	2523.2	0.2
Sample16	10	Glyoxylate_1	1174000	110800	7.49	0.15	2097.6	0.32
Sample16	10	Glyoxylate_2	20070000	1883000	7.49	0.16	2854.1	0.32
Sample17	10	MG_1	476800	30970	9.85	0.21	138.3	0.6
Sample17	10	MG_2	16870	1279	9.86	0.17	256.4	0.5
Sample17	10	Lac_1	6073000	652500	6.08	0.15	2869.6	0.27
Sample17	10	Lac_2	759800	87370	6.07	0.13	2297.8	0.25
Sample17	10	Lac_3	408200	43130	6.08	0.15	972.6	0.27
Sample17	10	Pyr_1	3936000	245900	7.92	0.42	4673.5	0.66
Sample17	10	Pyr_2	141500	12910	7.94	0.14	641.7	0.45
Sample17	10	OAA_1	295600	29160	7.8	0.15	647.9	0.31
Sample17	10	OAA_2	173300	17710	7.8	0.15	1707.8	0.28
Sample17	10	Cit_1	4835000	556300	7.37	0.13	19083.1	0.26
Sample17	10	Cit_2	4953000	565000	7.37	0.13	35878.7	0.26
Sample17	10	Cit_3	247000	28780	7.36	0.12	5770.7	0.26
Sample17	10	2-KG_1	7772000	710300	7.88	0.15	19491.5	0.35
Sample17	10	2-KG_2	3583000	332100	7.88	0.15	12624.2	0.35
Sample17	10	Fumarate	6027000	528100	7.8	0.16	8734.7	0.36
Sample17	10	Succinate	27470000	3032000	6.86	0.13	23377.6	0.27
Sample17	10	Fum_2	530700	48200	6.14	0.14	284.2	0.37
Sample17	10	Suc_2	25220000	2798000	6.86	0.13	9627.8	0.27
Sample17	10	MethylCitrate	1235000	116100	7.55	0.14	4915.5	0.35
Sample17	10	Malate	5891000	829900	6.64	0.1	3687	0.2
Sample17	10	Glyoxylate_1	1092000	103700	7.49	0.15	1790.1	0.32
Sample17	10	Glyoxylate_2	19420000	1845000	7.49	0.15	3148.7	0.32
Sample18	10	MG_1	466200	29400	9.84	0.21	150.1	0.61
Sample18	10	MG_2	14450	1241	9.83	0.17	248.8	0.39
Sample18	10	Lac_1	7199000	774900	6.08	0.15	3264.3	0.27
Sample18	10	Lac_2	923800	107500	6.07	0.13	3186.8	0.25
Sample18	10	Lac_3	483200	50560	6.08	0.15	1396.4	0.27
Sample18	10	Pyr_1	3479000	221300	7.92	0.41	4106.1	0.66
Sample18	10	Pyr_2	135200	11550	7.93	0.14	675.4	0.49
Sample18	10	OAA_1	195100	18290	7.79	0.16	509.9	0.34
Sample18	10	OAA_2	106200	10320	7.8	0.15	1103.3	0.29
Sample18	10	Cit_1	1427000	162700	7.36	0.13	7428.5	0.26
Sample18	10	Cit_2	1489000	170400	7.36	0.13	34162.6	0.26
Sample18	10	Cit_3	75540	8619	7.36	0.13	1728.3	0.27
Sample18	10	2-KG_1	7144000	655900	7.88	0.15	20388	0.35
Sample18	10	2-KG_2	3362000	314200	7.87	0.15	13020.4	0.35
Sample18	10	Fumarate	5664000	499700	7.79	0.16	8672.4	0.36
Sample18	10	Succinate	24020000	2619000	6.85	0.13	17993.9	0.27
Sample18	10	Fum_2	511200	47320	6.13	0.14	281	0.39
Sample18	10	Suc_2	22290000	2434000	6.85	0.14	7222.4	0.28
Sample18	10	MethylCitrate	361800	31510	7.55	0.15	1701.9	0.4
Sample18	10	Malate	4394000	589300	6.64	0.1	3041.1	0.22
Sample18	10	Glyoxylate_1	1041000	98050	7.48	0.16	2067	0.32
Sample18	10	Glyoxylate_2	18440000	1752000	7.48	0.15	2864.7	0.32

## Sheet: Sheet2
	WT_Gluc			KO_Gluc			CO_Gluc			WT_Prop			KO_Prop			CO_Prop
	1	2	3	1	2	3	1	2	3	1	2	3	1	2	3	1	2	3		Parent ion mass (Q1)	Product ion mass (Q3)
Lactate	1610000	1445000	1132000	1857000	1638000	1870000	1142000	1531000	1829000	3212000	2836000	4170000	5112000	5007000	5435000	7266000	6073000	7199000		196	91.1
Pyruvate	2547000	2232000	2128000	1758000	1794000	1860000	1774000	1873000	2057000	3515000	3309000	3236000	3491000	4074000	4304000	3922000	3936000	3479000		299.1	91.1
Oxaloacetate	521100	377600	553600	395400	351000	424900	327000	329700	550600	428800	274500	234800	116400	403900	204200	315300	173300	106200		448	324.9
Citrate	38270000	36210000	39950000	31420000	28330000	32820000	18920000	21420000	26600000	8792000	6692000	7151000	3917000	8107000	4694000	7316000	4835000	1427000		508	91.1
2-KG	22580000	38180000	20520000	18490000	38940000	26070000	4032000	4829000	7110000	4279000	2872000	2923000	13700000	13150000	16330000	9332000	7772000	7144000		462	338.9
Fumarate	4143000	3942000	3858000	3345000	3788000	3883000	3719000	3582000	4041000	4239000	3760000	4175000	4916000	4808000	5401000	6086000	6027000	5664000		327.1	91.1
Succinate	36510000	43750000	38980000	34790000	41760000	42000000	19220000	20070000	23600000	34310000	28180000	39670000	31560000	49170000	38760000	35440000	27470000	24020000		329.1	91.1
MethylCitrate	196500	215100	249700	73200	74990	102200	56760	78670	159500	7114000	3922000	4005000	2722000	6747000	2911000	2689000	1235000	361800		522	91.1
Malate	9550000	9835000	8170000	6901000	7631000	8555000	5106000	6858000	9744000	5535000	5313000	6940000	3126000	5318000	3470000	9059000	5891000	4394000		345	91.1
Glyoxylate	7763000	7851000	7180000	7544000	7406000	7688000	6940000	6793000	7233000	16300000	16850000	16730000	16570000	17970000	20380000	20070000	19420000	18440000		285	91.1
