# Supplementary material for: Biosensor-integrated transposon mutagenesis reveals rv0158 as a coordinator of redox homeostasis in Mycobacterium tuberculosis
Source: eLife. 2023 Aug 29;12:e80218. doi: 10.7554/eLife.80218 (PMC10501769; doi:10.7554/eLife.80218)
Supplement: Supplementary file 1. [file elife-80218-supp1.xlsx]

## Sheet: TnLib1
genome accession number: NC_018143.2
chromosomal coordinates of transposon insertion/TA site	Number of reads
3282	52
3285	112
3473	3
3681	1
3927	2
5127	12
5130	11
9102	3
9815	4
9818	6
9849	5
9852	10
9876	4
9879	3
9905	1
10276	3
10768	3
10771	1
10825	22
10828	9
11095	2
11098	10
11200	1
11288	15
11291	3
11424	5
11529	146
11532	98
11555	1
11558	4
11617	46
11620	38
11674	12
11677	22
11678	9
11732	31
11735	27
11738	4
11742	54
11745	48
11786	14
11789	14
12252	7
12354	2
12465	46
12468	33
12490	109
12493	50
12532	1
12620	4
12662	2
12665	4
13024	49
13027	13
13045	849
13048	1187
13081	4
13167	19
13170	19
13308	1
13311	5
13321	124
13324	59
13327	14
13368	434
13371	692
14023	1
14058	3
14061	5
14079	21
14082	31
14095	2
14757	4
14760	3
15514	2
15517	2
19581	4
19770	2
19831	1
19965	17
20177	161
20180	97
20344	5
20455	30
20458	9
20499	2
20679	10
20682	3
20786	1
20858	2
20861	3
21413	1
21416	1
21480	7
21483	5
22069	5
22072	6
22117	6
22120	6
22197	10
22198	8
22204	1
22456	1
23380	571
23383	315
23639	4
23725	8
23809	1
24985	2
25101	3
25167	28
25169	583
25170	44
25172	369
25259	2
25504	4
25507	4
25615	12
25618	66
25623	1
25626	2
25729	45
25732	77
25843	24
25846	17
25913	67
25916	45
25959	74
25962	107
26042	2
26066	2
26069	4
26140	292
26143	274
26185	12
26192	10
26195	9
26199	371
26260	1
26289	2
26376	5
26379	4
26621	4
26744	1
26830	4
26833	7
26862	13
26931	11
26934	18
27244	22
27247	20
27251	21
27254	43
27298	1
27353	35
27356	81
27409	14
27412	12
28511	1
28514	505
28669	9
28672	8
28704	11
28707	6
28973	9
28976	2
29012	2
29204	35
29207	19
29586	53
29589	6
29604	2
29658	1
29661	8
29669	73
29670	70
29673	38
29775	35
29778	23
29891	9
29894	6
29919	5
29922	6
30481	58
30678	40
30681	24
30970	26
31074	1
31152	21
31155	15
31222	7
31225	12
31322	2
31325	1
31596	1
31599	9
31703	16
31827	4
32165	2
32252	2
32255	18
32672	4
32675	1
32776	70
32779	39
33047	9
33057	12
33060	12
33112	19
33115	25
33151	2
33216	350
33219	214
33358	1
33361	1
33804	10
33807	7
33865	3
33941	2
33944	1
34027	26
34030	25
34181	9
34184	2
34363	12
34366	15
34369	6
34419	6
34420	4
34422	5
34506	11
34592	9
34681	8
34690	4
34895	2
35352	1
35355	2
35569	2
35572	11
35705	2
35783	2
35909	5
35912	1
36028	3
36031	4
36193	1
36325	167
36328	354
36355	5
36358	6
36454	787
36457	1446
36514	15
36517	20
36804	1
37092	12
37095	3
37124	256
37127	427
37352	5
37355	8
37360	2
37363	1
37403	13
37406	13
37514	4
37665	16
37668	7
37751	23
37754	20
37774	7
37777	16
37783	10
37786	27
37828	40
37831	86
37943	19
37946	14
38002	30
38005	28
38064	2
38067	3
38095	4
38098	5
38132	8
38135	26
38248	1
38251	5
38362	6
38443	38
38446	23
38516	13
38519	10
38590	7
39289	33
39292	49
39342	16
39345	6
39872	68
39875	73
39880	3
39939	4
39940	3
39943	5
39966	97
39969	49
40010	1
40027	105
40140	3
40143	3
40155	2
40158	2
40240	54
40394	3
40473	60
40476	115
40495	19
40498	15
40848	1
40851	4
40960	22
40963	34
41178	6
41181	9
41247	12
41250	17
41373	14
41376	35
41426	6
41429	4
41495	13
41498	12
41595	45
41717	10
41720	9
41726	1
41729	5
41914	16
41917	10
42207	11
42210	11
42275	7
42278	10
42361	1
42364	10
42643	23
42646	40
42712	19
42715	29
42808	1
42851	30
42854	43
42856	15
42883	30
43244	647
43247	316
43546	115
43548	32
43549	41
43551	21
46468	8
46471	20
46778	2
46781	2
47121	20
47226	12
47362	41
47365	36
47393	4
47458	2
47461	5
47612	5
48037	1
48040	2
48103	188
48106	349
48449	23
48452	14
48480	21
48483	30
48488	4
48491	9
48516	4
48781	4
48784	9
48894	9
48897	15
48985	335
49390	1
49655	17
49658	17
49749	4
49752	2
49933	16
49936	7
51148	1
51185	2
51518	2
51521	5
51610	24
51613	15
51837	19
51840	15
51882	44
51906	41
51909	54
51966	3
51969	12
52122	10
52125	2
52129	51
52131	6
52179	6
52182	8
52191	24
52365	68
52368	73
52523	19
52526	13
52540	22
52543	29
52658	1
52661	3
52705	11
52708	18
52711	7
52773	1
52776	12
52796	5
52799	8
52831	5
52872	124
52875	120
53116	9
53151	25
53154	18
53890	1
53989	5
54871	1
55084	1
55087	1
55522	2
55525	3
55795	1
56053	4
56056	1
56079	3
56151	84
56154	117
56160	4
56163	4
56181	21
56184	22
56187	12
56190	8
56214	3
56217	5
56520	8
56838	2
56841	1
57039	27
57042	54
57045	12
57153	1
57274	3
57277	10
57388	3
57391	2
57506	5
57509	5
57698	2
57701	6
57730	12
57733	16
57874	1
57877	2
57955	5
58476	1
58525	8
59354	4
59357	6
59985	5
60122	9
60125	19
60207	1
60210	1
60232	5
60235	2
63190	13
63193	5
63208	9
63211	4
63373	2
63375	17
63376	6
63378	15
63427	2
63430	1
63497	2
63500	369
63575	6
63784	8
63787	9
63798	7
63801	1
63859	14
63862	13
63880	324
63883	538
63886	35
63904	1
63907	1
64982	2
64985	1
65121	1
65124	5
65165	15
65168	18
65322	3
65430	1
65433	17
65496	1
65545	16
65548	6
65691	8
65983	8
65986	22
66031	18
66034	15
66057	13
66060	17
66061	14
66064	16
66274	29
66445	2
66786	2
67067	3
67070	4
67123	1590
67126	1020
67134	7
67135	2
67243	33
67246	41
67289	6
67312	2
67315	8
67360	12
67363	19
67951	32
67954	28
68181	331
68184	397
68218	21
68221	16
68242	6
68245	3
68306	143
68309	138
68320	1
68376	1
68386	7
68440	1
68443	24
68733	153
68736	85
69120	4
69186	23
69189	18
69312	1
69338	8
69653	13
69656	26
69740	70
69743	48
69805	5
70024	2
70026	2
70027	1
70566	6
70569	7
70727	1
70740	2
70743	5
70842	1
70962	13
71139	26
71142	11
71154	2
71157	3
71296	131
71299	9
71593	1
71675	1
71677	2
71678	374
71680	1
72085	1
72105	9
72108	8
72384	1
72387	1
72985	1
73490	55
73493	46
74695	12
75609	417
75611	9
75612	258
75614	3
76885	27
76888	19
77418	3
77421	3
77526	9
77529	3
77837	4
78441	22
78624	18
78627	12
78658	27
78661	11
78702	4
78705	11
78780	13
78783	26
79151	3
79255	22
79321	13
79324	11
79397	1
79723	11
79783	29
79786	10
79821	2
79824	1
79890	5
79893	9
80348	2
80351	7
80422	2
80425	1
80517	25
80520	22
80608	15
80611	6
80783	1
80786	1
80831	97
81161	7
81164	36
81175	21
81178	14
81192	3
81195	4
81215	71
81216	4
81219	6
81373	5
81395	2
81562	6
81565	18
81708	4
81711	499
81714	381
81892	310
81895	272
81923	4
82360	9
82413	8
82416	7
82513	5
82516	7
82682	19
82685	33
83110	4
83353	6
83356	3
83581	1
83734	349
83737	557
83842	9
83845	14
83942	4
83945	14
83962	18
83965	10
83977	1
83980	6
83991	1
84061	2
84077	16
84080	31
84352	7
84504	3
84507	1
84539	2
84542	6
84613	14
84616	13
84829	15
84832	24
84917	16
84948	10
84951	9
84952	44
84955	64
85109	22
85112	36
85219	23
85222	24
85571	2
85633	6
85636	9
85972	3
85975	4
86099	27
86102	41
86355	7
86358	10
86377	1
86425	5
86432	6
86435	2
86677	2
86680	4
86708	3
86920	2
86923	3
87339	1
87342	1
87601	34
87604	26
87627	2
87954	9
88011	1
88072	6
88075	7
88228	37
88231	48
88426	5
88627	1
88630	14
88677	10
88680	4
88728	3
88731	7
88774	30
88777	53
88950	16
88953	21
89267	3
89270	2
89379	10
89382	11
89589	2
89592	10
89746	8
89793	50
89796	48
89884	14
89913	38
89916	43
89981	2
90097	18
90100	27
90320	38
90493	9
90496	12
90935	10
90938	28
91068	1
91071	3
91349	9
91352	11
92031	2
92034	12
92130	9
92133	13
92190	3
92330	2
92333	1
92406	12
92812	3
92815	7
94265	4
94268	5
94560	57
94563	77
94772	3
94775	6
95038	1
95041	2
95406	1
95459	9
95462	14
96509	23
96512	36
97067	2
97070	3
97098	32
97101	7
97331	1
97469	12
97591	1
97889	10
97892	26
98091	37
98256	1
98296	20
98309	21
98312	5
98375	7
98378	11
98548	4
98551	1
98832	4
98835	3
99019	2
99022	5
99184	11
99187	20
99440	4
99443	5
99728	10
99731	36
100172	20
100175	54
100178	23
100202	18
100205	18
100504	3
100513	3
100516	3
100801	1
100979	20
100982	17
101078	2
101091	6
101094	2
101162	1
101165	2
101190	4
101194	1
101197	13
101315	3
101318	11
101405	9
101408	7
101860	8
101863	7
102089	1
102092	2
102227	14
102230	10
102452	9
102455	8
102527	73
102530	100
102608	5
102611	5
103048	30
103051	25
103626	4
103805	1
103808	4
103956	5
104030	9
104033	3
104046	5
104049	10
104091	4
104112	11
104153	162
104156	124
104420	18
104423	5
104460	2
104463	3
104468	380
104471	248
104487	2
104561	5
104583	7
104586	11
104610	1
104802	4
104805	6
105245	14
105248	7
105258	5
105325	6
105503	1
105527	3
105582	4
105585	7
105731	2
105932	2
106322	2
106351	5
106663	26
106666	24
106801	23
106803	36
106804	7
106806	45
106937	15
106940	13
107027	14
107029	2
107032	303
107035	18
107038	20
107102	2
107105	6
107244	5
107287	8
107324	12
107327	6
107448	8
107451	6
107452	4
107455	3
107588	9
107591	10
107946	13
108392	1
108850	5
108951	1
109406	10
109409	9
110072	14
110075	15
110090	15
110093	6
110336	6
110339	5
110469	3
110472	7
110966	19
110969	6
111144	4
111147	12
111722	3
111725	9
112320	7
112323	9
112905	3
112918	1
112922	1
112925	4
112988	5
112991	12
113091	1
113094	11
113129	1
113132	2
113458	15
113461	22
113513	1
113516	3
113570	3
113576	310
113579	223
114508	5
114511	10
114701	7
114704	31
114899	9
114902	4
115031	19
115034	10
115074	27
115077	23
115293	1
115301	56
115304	20
115338	2
115414	7
115417	19
115457	38
115460	39
115559	4
115562	3
115713	1
115815	9
115832	24
115835	8
116360	9
116363	1
116648	3
116707	3
116729	2
116951	9
116954	26
117164	28
117167	18
117209	10
117212	2
117533	29
117536	27
117618	7
117621	7
119726	2
119729	3
119747	2
120044	30
120120	8
120252	8
120255	10
120625	19
120790	351
120898	4
120901	20
120936	5
120939	565
121247	7
121250	11
121287	5
121290	8
121393	188
121396	523
121496	5
121499	3
121762	67
121765	33
121766	5
121769	11
121852	5
121855	3
121915	4
121946	5
121949	1
122041	5
122207	13
122210	6
122303	8
122384	21
122387	26
122490	11
122493	13
122538	249
122541	332
122562	24
122565	10
122595	6
122760	4
122763	3
122830	2
122833	10
122988	25
122991	39
123045	3
123048	2
123239	6
123242	13
123345	10
123521	5
123608	8
123611	24
123667	7
123670	7
123825	16
123828	10
123892	8
123895	11
123906	7
123909	21
124144	329
124145	1
124721	3
125011	12
125017	54
125020	67
125643	2
125822	27
126094	5
126959	692
126962	589
127153	7
127156	1
127388	17
127391	12
127499	16
127502	4
127727	32
127730	33
128024	3
128105	7
128108	4
128153	2
128301	63
128304	53
128900	17
128903	25
128979	13
128982	11
129230	1
129317	34
129320	57
129492	6
129495	3
129704	1
129856	12
129859	10
130015	74
130018	43
130070	67
130073	56
130103	12
130106	5
130554	19
130557	18
130583	4
130586	3
130598	10
130601	2
130612	1
130615	3
130695	60
130698	160
130707	36
130925	64
130928	118
131033	48
131036	38
131136	25
131139	20
131145	374
131148	694
131325	9
131328	38
131539	16
131542	12
131550	13
131553	29
131565	6
131737	23
131740	21
132047	11
132074	5
132077	1
132273	12
132276	25
132350	9
132353	2
132635	25
132638	42
132749	2
132752	6
132838	3
132867	17
132870	11
132975	68
132999	14
133002	8
133016	23
133019	11
133136	49
133137	2
133248	4
133275	49
133278	21
133314	477
133317	538
133407	2
133410	7
133626	24
133629	52
133833	1
134014	1
134017	3
134056	3
134302	5
134305	4
134356	58
134359	35
134397	6
134400	6
134466	248
134469	375
134652	6
134655	4
134983	15
134986	8
134988	21
134991	5
135000	308
135074	31
135077	18
135460	17
135463	4
135480	4
135635	1
135673	2
135676	1
135817	255
135820	240
136086	2
136160	1
136375	3
136379	1
136852	8
136855	23
136988	394
136991	216
138097	3
138100	2
138167	221
138170	168
138616	9
138627	271
138630	426
138794	5
138797	11
139119	1
139264	8
139267	11
139353	1
139356	6
139508	13
139511	10
139660	3
139663	4
140106	1
140114	21
140117	14
140234	13
140237	31
140310	1
140341	1
140344	1
140403	2
140422	6
140433	8
140436	15
140617	12
140620	15
140999	13
141003	2
141066	2
141272	2
141393	2
141396	1
141683	1
141692	1
141695	2
142068	8
142163	2
142400	5
143191	2
143371	10
143374	10
143716	1006
143719	745
143779	3
143782	3
143922	14
143925	17
143943	18
143946	25
146284	11
146287	14
146682	3
146685	8
146688	9
147242	44
147245	46
147476	1
147479	3
147877	3
147880	326
148188	6
148191	3
148192	7
148195	8
148350	47
148353	31
148569	2
148700	3
148703	2
148746	12
148749	15
148752	2
149219	18
149222	32
149464	12
149467	12
149592	2
149935	5
150283	12
150286	10
150869	13
150871	9
150872	39
150874	17
151063	2
151117	31
151120	21
151121	3
151358	470
151361	303
151484	2
151487	6
151505	35
151508	23
151810	9
151942	29
151945	5
152798	1
154122	2
155618	65
155621	17
155860	9
155863	6
155959	9
155962	15
155981	7
155984	1
156085	2
156102	22
156105	10
156183	5
156186	10
156236	5
156239	36
156242	42
156303	9
156305	21
156306	16
156308	22
156309	7
156312	11
156397	11
156400	4
156432	2
156672	8
156735	6
156738	7
156837	27
156840	14
157053	68
157056	88
157188	44
157191	41
157281	82
157284	128
157326	8
157431	8
157434	5
157600	2
157814	5
157817	2
158078	5
158761	3
158840	3
159042	5
159045	3
159219	14
159222	1
159510	3
159513	9
159662	13
159665	14
159678	16
159681	24
159728	5
159731	12
160430	3
160432	7
160433	9
160435	6
160543	51
160546	63
160636	26
160639	7
160938	27
160941	31
160963	1
161241	7
161244	8
161346	43
161349	23
161382	39
161385	54
161604	11
161607	9
161698	69
161701	91
161719	6
161722	5
161753	22
161756	10
162008	10
162011	8
162013	3
162208	66
162211	6
162277	10
162280	1
162356	8
162407	1
162452	15
162455	23
162642	29
162645	62
162873	2
162876	2
162940	2
162951	2
162954	1
163089	2
163092	17
163259	87
163262	161
163263	12
163266	7
163282	1
163400	30
163403	34
163568	100
163729	4
163732	10
163818	4
163934	13
163951	78
163954	129
164002	2
164095	1
164098	3
164394	2
164397	2
164414	25
164464	244
164467	370
164475	3
164478	1
164772	10
165002	11
165005	19
165127	8
165130	2
165279	34
165282	65
165302	3
165431	14
165434	12
165671	368
165674	681
165710	51
165713	53
165821	24
165824	32
165921	46
165924	35
165969	2
165972	13
166046	7
166049	26
166052	6
166256	35
166259	40
166301	5
166349	39
166352	26
166517	19
166520	9
166672	1
166675	4
166862	2
167063	1
167065	2
167117	5
167120	5
167144	20
167147	19
167213	9
167332	1
167335	8
167398	2
167442	5
167445	10
167836	4
168155	17
168158	2
168986	1
168989	4
169154	15
169157	18
169170	10
169173	3
169205	4
169208	5
169302	27
169305	8
169316	2
169352	50
169355	53
169377	11
169380	14
169392	2
169395	1
169932	1
169935	4
170030	6
170447	14
170450	18
170477	30
170480	15
170556	146
170559	236
170596	21
170599	20
170662	40
170665	34
170686	8
170689	5
171030	123
171031	87
171049	14
171052	12
171176	78
171179	36
171184	1
171185	5
171188	9
171190	741
171193	444
171197	8
171198	5
171201	9
171243	2
171485	1
171518	11
171521	4
171653	9
171656	8
171750	638
171753	461
171807	6
171809	54
171812	122
171837	1
172445	18
172483	9
172486	16
172487	273
172490	317
172524	4
172527	3
172595	2
172778	7
172781	10
172782	11
172785	1
172967	15
172970	10
173138	12
173141	5
173165	26
173166	133
173168	14
173175	29
173178	39
173192	7
173195	7
173218	318
173381	6
173384	7
173464	18
173467	11
173544	2
173547	1
173670	35
173673	35
173692	19
173695	8
173715	13
173724	21
173829	71
173832	43
174043	31
174111	27
174114	17
174485	1
174488	4
174701	114
174704	53
174705	11
174708	12
174797	11
174798	23
174800	4
174896	1
174901	7
174904	11
175037	11
175040	8
175189	15
175192	6
175221	9
175224	4
175319	30
175322	41
175357	18
175360	7
175382	14
175385	16
175499	6
175502	2
175617	2
175620	255
175688	5
175691	2
175694	23
175697	14
175716	7
175745	12
175748	4
175792	17
175847	4
176063	17
176066	32
176075	39
176078	50
177043	2
177046	1
177176	36
177179	9
177336	10
177339	10
177340	4
177343	4
177354	5
177357	2
177508	49
177511	57
177514	18
177569	23
177572	4
177712	5
177715	3
177725	5
177728	9
177744	23
177747	8
177865	33
178066	1
178080	22
178083	13
178180	2
178183	114
178186	229
178230	19
178233	35
178255	50
178258	45
178357	32
178360	42
178396	1
178399	2
178449	25
178641	4
178693	5
178695	32
178698	43
178777	9
178780	9
178848	66
178851	160
179108	2
179111	8
179242	1
179253	2
179256	4
179332	6
179339	2
179373	23
179376	39
179463	7
179466	10
179469	196
179472	465
179608	3
179875	6
179878	6
180007	25
180010	57
180013	13
180026	3
180028	1
180029	7
180031	3
180045	2
180050	5
180053	4
180088	2
180091	5
180099	8
180102	2
180178	3
180181	2
180190	67
180193	123
180235	54
180393	14
180396	14
180450	419
180453	293
180561	8
180564	16
180591	16
180605	582
180608	510
180618	6
180621	11
180842	16
180845	10
181022	29
181237	20
181273	3
181554	2
181557	8
181609	14
181612	13
181632	5
182461	12
182464	5
182735	28
182978	18
182981	12
183016	2
183019	4
183218	3
183221	29
183234	2
183242	552
183245	232
183342	7
183345	4
183405	42
183444	1
183586	1
183596	20
183599	26
183614	101
183790	2
183793	4
183921	21
183924	17
184048	12
184050	27
184051	9
184053	30
184216	1
184717	17
184720	17
184723	16
184726	22
185061	2
185064	5
185079	19
185082	28
185483	1
185858	1
185861	2
185991	32
185994	18
186140	200
186143	275
186174	40
186177	24
186413	305
186416	212
186474	46
186477	27
186660	422
186663	274
186703	16
186706	7
186727	5
186730	8
186810	2
186813	1
186849	17
186852	14
186926	33
186929	36
186932	6
186935	37
186938	7
186971	5
187040	79
187043	79
187118	3
187121	7
187181	2
187194	9
187232	15
187235	15
187265	6
187268	6
187289	14
187292	28
187548	1
187551	12
187554	40
187557	46
187558	3
187561	747
187595	37
187598	50
187601	32
187691	1
187694	2
187704	7
187707	4
187710	13
187713	11
187716	12
187727	2
187730	3
187772	2
187775	17
187830	47
187833	73
187836	32
187908	9
187911	22
187960	26
187963	34
188010	392
188013	346
188028	34
188065	3
188079	17
188082	3
188091	1
188125	13
188128	10
188180	3
188183	6
188341	453
188409	4
188545	311
188548	236
188639	6
188642	5
188762	3
188765	3
188832	35
188872	8
188875	9
188991	9
188994	29
189058	54
189061	36
189154	3
189157	5
189361	287
189364	484
189382	270
189385	200
189442	17
189445	20
189457	2
189460	705
189466	15
189544	152
189547	255
189569	2
189613	26
189616	37
189662	94
189665	254
189683	1
189686	11
189730	1
189757	3
189760	4
190004	5
190252	2
190255	10
190264	5
190267	13
190325	46
190328	37
190509	1
190512	3
190513	11
190516	10
190522	22
190525	59
190579	5
190582	3
190591	5
190784	13
190787	13
190858	29
190861	10
191088	36
191091	90
191113	4
191156	2
191159	1
191924	12
191927	22
191985	1
192165	15
192168	28
192369	37
192372	43
193050	2
193076	131
193107	5
193110	11
193231	37
193234	19
193336	10
193339	13
193367	57
193370	42
193414	5
193417	3
193559	3
193562	3
193567	12
193570	19
193656	22
193659	14
194106	4
194305	31
194307	27
194308	10
194310	25
194320	2
194422	22
194425	5
194930	901
194933	884
194937	1
194940	4
194990	16
195050	10
195053	13
195159	45
195162	42
195479	13
195482	11
195489	2
195557	305
195560	175
195638	5
195641	11
195755	42
195758	56
196240	1
196259	24
196291	6
196294	9
196425	6
196428	14
196455	66
196458	36
196487	7
196490	25
196697	8
196700	1
196888	23
197088	492
197091	396
197389	15
197392	15
197419	19
197720	1
197813	2
197816	3
198200	2
198214	1
198254	3
198257	2
198275	64
198278	49
198284	25
198287	37
198374	29
198377	29
198380	14
198383	55
198386	11
198491	39
198494	20
198595	1
198598	4
198630	1
198633	42
198726	121
198729	113
[truncated: 40,421 more rows]

## Sheet: TnLib2
genome accession number: NC_018143.2
chromosomal coordinates of transposon insertion/TA site	number of reads
74	1
1637	3
1857	12
1860	22
3282	129
3285	193
3707	1
3710	3
3924	2
3927	6
3988	1
4123	1
5127	15
5130	18
9815	2
9818	2
9849	5
9876	4
9879	1
9896	2
9902	7
9905	2
10022	3
10025	2
10276	1
10279	2
10425	3
10428	4
10768	3
10771	3
10825	8
10828	6
11095	2
11098	9
11200	2
11288	13
11291	9
11424	2
11529	173
11532	80
11555	1
11558	12
11617	47
11620	32
11674	27
11677	27
11678	2
11681	2
11732	36
11735	24
11738	4
11741	3
11742	77
11745	91
11786	35
11789	17
12252	11
12351	5
12354	6
12465	34
12468	29
12490	99
12493	101
12529	8
12532	11
12620	2
12623	2
12665	14
12752	1
13024	66
13027	37
13045	955
13048	1341
13081	2
13167	10
13170	11
13308	9
13311	6
13321	201
13324	134
13327	23
13368	541
13371	946
13559	1
13902	1
13905	1
14020	1
14058	6
14061	8
14079	70
14082	90
14095	3
14620	3
14623	1
14660	5
14663	1
14664	1
14667	1
14757	20
14760	36
15514	6
15517	3
19102	2
19137	1
19150	2
19455	2
19460	2
19581	3
19584	5
19770	4
19773	4
19965	12
20091	2
20094	4
20177	221
20180	169
20233	4
20236	7
20277	2
20280	6
20344	9
20347	10
20455	40
20458	26
20496	1
20499	2
20549	1
20679	4
20682	3
20786	3
20789	6
20858	5
20861	7
21413	1
21416	1
21480	14
21483	5
22069	4
22072	5
22117	5
22120	12
22189	1
22197	4
22198	6
22201	8
22204	3
22456	4
23380	679
23383	503
23393	3
23396	3
23549	1
23552	3
23642	1
23662	2
23680	1
23725	14
23809	2
24985	2
24988	2
25098	5
25101	12
25167	18
25169	653
25172	526
25259	1
25262	3
25504	3
25507	5
25615	25
25618	93
25623	1
25626	6
25729	63
25732	67
25843	25
25846	26
25913	68
25916	59
25959	77
25962	130
26039	5
26042	1
26066	10
26069	4
26140	389
26143	214
26185	2
26192	14
26195	17
26196	1
26199	426
26279	1
26289	1
26292	3
26376	10
26379	5
26416	1
26419	1
26621	4
26624	1
26744	3
26830	5
26833	1
26862	9
26931	17
26934	28
27244	42
27247	21
27251	23
27254	28
27301	1
27353	44
27356	57
27409	15
27412	8
27685	2
28367	1
28370	3
28511	1
28514	342
28669	12
28672	5
28704	1
28707	3
28913	1
28916	4
28976	11
29012	4
29204	33
29207	35
29569	4
29586	24
29589	28
29604	5
29607	4
29658	15
29661	10
29669	66
29670	73
29673	58
29775	21
29778	27
29891	6
29894	10
29919	3
29922	6
30481	78
30678	33
30681	35
30970	40
31152	33
31155	28
31222	8
31225	15
31322	5
31325	3
31596	4
31599	9
31700	1
31703	8
32133	1
32162	7
32165	3
32252	13
32255	24
32672	7
32675	1
32776	82
32779	48
33047	18
33057	44
33060	16
33112	45
33115	24
33216	383
33219	295
33562	1
33804	11
33807	10
33856	3
33859	3
33862	6
33865	7
33941	5
33944	9
34027	49
34030	45
34181	4
34184	7
34363	15
34366	17
34369	7
34417	20
34419	4
34420	10
34422	7
34506	21
34589	6
34592	2
34678	9
34681	15
34690	16
34876	1
34895	2
35077	1
35260	3
35352	2
35355	1
35569	5
35572	9
35705	3
35780	2
35909	1
36028	5
36031	12
36193	5
36325	190
36328	511
36355	15
36358	8
36454	1067
36457	2174
36514	30
36517	49
36804	4
37092	15
37095	12
37124	325
37127	573
37213	3
37352	11
37355	13
37360	6
37363	3
37403	18
37406	13
37514	8
37665	26
37668	20
37751	64
37754	37
37774	8
37777	14
37783	18
37786	24
37828	66
37831	103
37943	30
37946	19
38002	34
38005	33
38064	4
38067	8
38095	4
38098	9
38132	10
38135	28
38251	13
38362	7
38365	3
38443	48
38446	28
38516	11
38519	10
39289	55
39292	68
39342	14
39345	14
39872	76
39875	83
39877	5
39880	4
39936	1
39939	1
39940	21
39943	17
39966	68
39969	51
40027	143
40140	7
40143	6
40155	5
40158	1
40240	53
40394	2
40473	67
40476	106
40495	36
40498	14
40848	4
40851	3
40960	20
40963	20
41178	4
41181	6
41247	16
41250	37
41373	33
41376	19
41426	6
41429	3
41495	20
41498	14
41595	89
41717	8
41720	11
41726	1
41729	7
41909	5
41912	2
41914	15
41917	10
42082	1
42085	2
42207	14
42210	9
42275	17
42278	22
42361	2
42364	11
42643	17
42646	24
42712	7
42715	28
42808	3
42851	20
42856	4
42883	34
43244	536
43247	413
43546	120
43548	24
43549	89
43551	14
46468	20
46471	39
46524	4
46527	1
46778	1
47099	3
47121	26
47226	19
47362	68
47365	46
47393	2
47458	3
47461	1
47612	11
48037	2
48040	1
48103	284
48106	437
48110	7
48449	37
48452	11
48480	37
48483	30
48488	11
48491	5
48516	5
48781	9
48784	9
48894	12
48897	22
48985	435
49387	3
49390	7
49655	26
49658	24
49749	2
49752	6
49933	12
49936	13
51140	2
51148	10
51185	10
51452	1
51518	1
51521	1
51610	34
51613	20
51744	1
51747	1
51837	42
51840	37
51882	38
51906	41
51909	57
51966	2
51969	8
52122	15
52125	16
52129	95
52131	11
52179	8
52182	4
52191	10
52365	76
52368	60
52523	40
52526	35
52540	36
52543	20
52658	2
52661	9
52705	9
52708	9
52711	11
52773	3
52776	28
52796	4
52799	5
52828	4
52831	3
52836	2
52872	185
52875	117
53116	6
53151	12
53154	11
53241	1
53244	4
53989	16
54175	7
55084	5
55087	3
55522	5
55525	9
55795	11
56053	9
56056	13
56076	4
56079	5
56151	148
56153	1
56154	209
56160	10
56163	5
56181	19
56184	52
56187	8
56190	9
56214	14
56217	2
56838	5
56841	4
57039	54
57042	64
57045	12
57153	1
57274	3
57277	8
57388	7
57391	4
57506	7
57509	9
57611	2
57614	3
57698	8
57701	3
57730	19
57733	6
57874	4
57877	3
57952	3
57955	1
58456	1
58476	5
58522	6
59354	3
59357	10
59580	2
59985	6
60122	17
60125	29
60207	1
60210	2
60232	20
60235	19
63190	33
63193	12
63208	12
63211	23
63373	3
63375	27
63376	9
63378	33
63427	11
63430	3
63497	8
63500	452
63572	1
63575	9
63754	1
63784	21
63787	4
63798	2
63799	2
63801	3
63859	20
63862	25
63880	466
63883	712
63886	56
63889	3
63904	1
63907	5
64982	1
64985	1
65121	4
65124	15
65165	13
65168	22
65430	4
65433	6
65499	1
65545	10
65548	7
65691	3
65836	1
65983	9
65986	16
66031	15
66034	13
66057	14
66060	19
66061	9
66064	16
66274	20
66445	1
66783	1
66786	3
67067	8
67070	3
67123	1167
67126	652
67134	4
67135	2
67243	28
67246	34
67286	4
67289	1
67312	2
67360	16
67363	18
67897	1
67951	18
67954	29
68146	4
68149	1
68181	230
68184	409
68218	53
68221	32
68233	1
68242	4
68245	5
68306	91
68309	181
68373	1
68386	20
68403	1
68443	15
68733	138
68736	82
69120	12
69186	48
69189	81
69312	2
69315	1
69338	6
69653	11
69656	13
69740	109
69743	49
69802	2
69805	1
70026	2
70027	4
70029	2
70566	2
70569	3
70740	2
70743	5
70842	5
70962	7
71139	23
71142	8
71154	7
71157	4
71296	113
71299	12
71584	1
71587	1
71593	1
71677	1
71678	461
71680	8
72085	5
72088	4
72105	6
72108	14
72387	3
72502	2
72505	1
72985	3
73411	2
73490	42
73493	58
74558	2
74695	51
75045	5
75048	3
75138	2
75285	1
75609	641
75611	12
75612	385
75614	6
76294	1
76885	41
76888	27
77107	1
77418	1
77421	2
77526	10
77529	7
77837	3
78441	31
78474	1
78624	17
78627	18
78658	19
78661	18
78702	6
78705	21
78780	45
78783	43
79148	2
79151	3
79252	3
79255	22
79321	38
79324	16
79394	10
79397	5
79723	31
79783	40
79786	20
79821	4
79824	5
79890	15
79893	12
79916	13
80145	1
80227	2
80348	3
80351	20
80422	5
80517	52
80520	62
80608	31
80611	40
80783	8
80786	3
80831	97
81161	11
81164	19
81175	18
81178	46
81192	6
81195	10
81215	87
81216	9
81219	12
81373	40
81395	5
81562	21
81565	27
81711	698
81714	443
81734	1
81892	487
81895	393
81923	3
82037	1
82360	13
82413	7
82416	6
82513	10
82516	24
82682	47
82685	44
82822	1
83110	2
83113	4
83353	11
83356	6
83399	1
83402	10
83581	4
83584	2
83734	443
83737	723
83842	9
83845	14
83942	13
83945	16
83962	13
83965	16
83977	1
83980	2
83988	3
83991	2
84061	1
84077	29
84080	34
84229	1
84232	3
84504	8
84507	10
84539	1
84542	1
84613	14
84616	20
84829	18
84832	27
84917	15
84948	17
84951	20
84952	130
84955	82
85109	42
85112	73
85162	1
85219	29
85222	30
85275	1
85574	2
85633	11
85636	21
85972	4
85975	2
86099	51
86102	31
86355	23
86358	22
86374	2
86425	2
86428	1
86432	11
86435	10
86677	1
86680	1
86831	3
86834	1
86920	3
86923	1
87339	1
87342	1
87601	27
87604	30
87630	2
88011	1
88014	1
88075	5
88228	58
88231	53
88423	1
88426	8
88627	3
88630	12
88677	8
88680	12
88728	16
88731	6
88774	26
88777	62
88950	8
88953	11
89267	5
89270	1
89379	17
89382	15
89467	2
89470	1
89589	6
89592	15
89746	4
89793	46
89796	20
89881	11
89884	8
89913	42
89916	26
89978	5
89981	1
90097	14
90100	18
90320	17
90493	4
90496	9
90810	1
90935	10
90938	33
91068	4
91071	4
91349	12
91352	4
92034	16
92130	5
92133	6
92154	1
92192	2
92195	1
92330	3
92333	4
92406	10
92815	1
94265	2
94484	2
94560	68
94563	117
94772	4
94775	5
94868	2
95038	1
95406	1
95409	5
95459	12
95462	17
96139	6
96142	2
96509	31
96512	44
97098	30
97101	18
97331	1
97469	15
97588	8
97591	4
97889	14
97892	19
98091	25
98296	19
98309	15
98312	17
98375	11
98378	12
98467	3
98548	2
98551	4
98814	1
98817	3
98832	4
98835	3
99019	3
99022	3
99184	11
99187	14
99440	8
99443	2
99728	12
99731	40
100172	32
100175	38
100178	19
100202	10
100205	14
100501	6
100513	5
100516	3
100804	1
100979	46
100982	26
101078	2
101081	1
101091	7
101094	18
101119	1
101122	1
101162	1
101165	4
101190	1
101193	4
101194	5
101197	5
101315	4
101318	2
101405	7
101408	10
101860	4
101863	10
102092	4
102227	10
102230	25
102452	8
102455	9
102527	97
102530	118
102608	5
102611	8
103048	92
103051	78
103210	6
103213	2
103530	3
103533	1
103626	1
103805	8
103808	1
103953	2
103956	3
104030	4
104033	3
104046	12
104049	9
104091	9
104112	13
104153	175
104156	98
104420	13
104423	6
104460	15
104463	13
104468	322
104471	250
104487	1
104490	4
104561	9
104583	7
104586	6
104610	1
104802	15
104805	15
105245	27
105248	18
105258	1
105325	12
105328	1
105506	2
105527	4
105582	1
105585	1
105731	2
105929	1
106322	1
106663	23
106666	48
106684	2
106801	19
106803	44
106804	25
106806	73
106937	12
106940	27
107027	7
107029	3
107032	439
107035	10
107038	30
107102	6
107105	11
107244	21
107277	2
107284	1
107287	2
107324	6
107327	22
107448	24
107451	18
107452	5
107455	6
107588	7
107591	8
107794	2
107946	13
108389	3
108392	1
108850	18
108853	8
108951	7
109100	1
109406	17
109409	22
109821	4
110039	1
110072	18
110075	21
110090	6
110093	5
110336	10
110339	18
110469	34
110472	28
110966	29
110969	17
111144	8
111147	13
111722	20
111725	13
112320	14
112323	20
112902	1
112905	1
112918	6
112921	4
112922	34
112925	21
112988	14
112991	22
113091	8
113094	15
113129	14
113132	11
113458	11
113461	16
113513	6
113516	5
113570	5
113576	348
113579	259
114508	16
114511	20
114701	21
114704	28
114899	11
114902	18
114908	3
114911	1
115031	22
115034	22
115074	34
115077	47
115301	62
115304	37
115338	1
115414	17
115417	16
115457	108
115460	96
115487	1
115490	4
115559	4
115562	6
115815	9
115832	26
115835	28
116316	1
116319	9
116360	17
116363	4
116645	7
116648	2
116704	2
116729	4
116732	4
116951	24
116954	21
117164	38
117167	29
117209	6
117212	11
117533	33
117536	25
117618	8
117621	4
118005	1
119566	3
119726	6
119729	1
119744	2
120044	12
120120	17
120252	7
120255	15
120625	10
120790	396
120898	9
120901	11
120936	3
120939	636
121247	16
121250	18
121287	1
121290	7
121393	265
121396	740
121496	24
121499	13
121762	54
121765	39
121766	11
121769	25
121852	8
121855	7
121915	8
121946	1
121949	5
122041	3
122044	1
122103	30
122207	12
122210	14
122384	23
122387	28
122490	50
122493	27
122538	335
122541	453
122562	28
122565	14
122595	15
122760	7
122763	1
122830	3
122833	11
122988	40
122991	69
123045	6
123048	8
123239	7
123242	14
123345	19
123521	1
123608	8
123611	22
123667	10
123670	16
123825	6
123828	9
123892	9
123895	26
123902	3
123905	4
123906	22
123908	1
123909	28
123911	1
124144	368
124602	1
124721	1
125011	10
125017	57
125020	80
125291	1
125643	2
125822	16
126094	4
126097	3
126959	698
126962	427
127153	3
127156	8
127388	15
127391	12
127499	8
127502	12
127727	16
127730	17
128105	9
128108	5
128153	5
128301	44
128304	55
128612	1
128615	1
128900	11
128903	22
128979	7
128982	4
129317	29
129320	39
129492	1
129856	11
129859	12
129965	2
130015	59
130018	68
130070	58
130073	48
130103	7
130106	6
130490	1
130554	17
130557	27
130583	10
130586	3
130598	6
130601	2
130615	3
130695	29
130698	107
130707	42
130925	72
130928	120
131033	46
131036	52
131136	31
131139	20
131145	299
131148	517
131325	23
131328	31
131539	19
131542	5
131550	6
131553	21
131565	3
131737	23
132044	2
132047	9
132074	1
132077	1
132273	7
132276	20
132350	8
132353	2
132635	30
132638	57
132749	2
132752	7
132867	13
132870	12
132975	66
132999	10
133002	11
133016	16
133019	7
133136	70
133137	2
133245	3
133248	7
133275	37
133278	27
133314	396
133317	681
133407	1
133410	3
133424	1
133626	28
133629	48
134014	1
134017	1
134053	1
134056	3
134089	1
134302	3
134305	4
134356	44
134359	30
134397	2
134400	9
134466	210
134469	322
134652	6
134655	5
134983	10
134988	25
134991	13
134997	1
135000	262
135074	41
135077	26
135460	21
135463	6
135480	2
135483	2
135632	1
135635	1
135676	1
135817	217
135820	355
136086	1
136089	2
136375	12
136376	3
136852	18
136855	24
136988	531
136991	300
137677	1
138097	2
138100	1
138167	333
138170	235
138616	13
138627	313
138630	599
138794	9
138797	9
139116	1
139119	2
139264	8
139267	8
139353	9
139356	13
139508	18
139511	6
139660	3
139663	9
140103	8
140106	3
140114	34
140117	29
140210	1
140213	2
140234	28
140237	37
140310	3
140313	9
140341	4
140344	5
140403	5
140406	7
140433	3
140436	15
140567	3
140617	14
140620	31
140945	4
140948	3
140996	2
140999	19
141003	3
141063	1
141066	1
141272	1
141393	4
141396	7
141692	2
141715	3
141718	1
142068	7
142071	1
142166	3
142400	4
143188	7
143191	15
143371	6
143374	11
143716	975
143719	684
143779	5
143782	2
143922	7
143925	12
143943	11
143946	21
146284	6
146287	8
146682	3
146685	9
146688	3
147065	3
147242	18
147245	37
147476	10
147479	7
147877	5
147880	336
148188	1
148191	1
148192	9
148195	13
148350	70
148353	28
148569	7
148700	3
148703	1
148746	22
148749	29
149152	2
149155	9
149219	8
149222	1
149464	23
149467	8
149546	2
149589	2
149935	9
149938	2
150283	6
150286	9
150869	10
150871	4
150872	61
150874	19
151060	1
151117	16
151120	16
151124	1
151358	367
151361	295
151484	3
151505	21
151508	30
151810	14
151942	9
151945	10
152639	1
152642	1
152798	6
152801	3
152813	4
153416	4
153419	1
153713	1
154031	2
154122	9
154125	14
154175	1
155441	1
155618	40
155621	28
155728	2
155860	3
155863	9
155959	5
155962	19
155981	10
155984	8
156102	26
156105	10
156183	5
156186	5
156236	10
156239	51
156242	43
156303	9
156305	18
156306	15
156308	28
156309	8
156312	24
156397	15
156400	5
156432	1
156672	12
156706	1
156735	4
156738	1
156837	95
156840	74
157053	221
157056	321
157182	1
157185	1
157188	204
157191	158
157221	2
157281	222
157284	404
157287	1
157326	34
157431	16
157434	74
157600	8
157814	9
157817	11
158078	11
158675	2
158761	1
158837	2
158840	1
159042	5
159045	13
159049	1
159219	13
159222	3
159510	15
159513	39
159662	31
159665	17
159678	24
159681	24
159728	3
159731	7
160430	2
160543	90
160546	75
160568	3
160636	22
160639	8
160938	18
160941	46
160963	3
160966	1
161241	17
161346	13
161349	26
161382	37
161385	40
161604	2
161607	12
161698	55
161701	115
161719	3
161722	2
161753	10
161756	10
162008	2
162011	18
162013	2
162208	78
162211	13
162277	9
162280	14
162353	14
162356	9
162407	7
162452	4
162455	13
162536	1
162539	3
162642	39
162645	64
162873	6
162876	11
162940	5
162943	4
162951	5
162954	4
163089	6
163092	20
163259	131
163262	171
163263	18
163266	13
163282	4
163400	46
163403	33
163568	100
163729	2
163732	10
163821	2
163934	38
163951	71
163954	123
163999	2
164002	2
164095	5
164098	4
164394	3
164397	1
164414	36
164464	280
164467	428
164475	5
164478	4
164772	12
164815	1
164818	4
164830	2
165002	10
165005	9
165064	1
165127	4
165130	6
165279	39
165282	65
165302	3
165431	34
165434	21
165671	403
165674	772
165710	94
165713	81
165821	18
165824	28
165921	74
165924	48
165969	12
165972	11
166046	9
166049	29
166052	23
166256	37
166259	61
166349	40
166352	31
166517	13
166520	8
166672	2
166675	9
166859	1
166862	1
167060	1
167062	1
167117	4
167120	15
167144	23
167147	15
167210	1
167213	11
167332	3
167335	8
167395	6
167398	2
167442	8
167445	3
168155	4
168158	7
168449	4
168986	6
168989	6
169154	11
169157	7
169170	47
169173	36
169205	9
169208	3
169302	9
169305	15
169313	5
169316	3
169352	51
169355	40
169377	17
169380	28
169392	5
169932	4
169935	6
170030	4
170033	3
170447	23
170450	17
170454	1
170477	31
170480	11
170556	180
170559	276
170596	45
170599	37
170662	34
170665	63
170686	4
170689	11
170818	1
171030	105
171031	80
171049	19
171052	22
171176	113
171179	56
171185	8
171188	9
171190	823
171193	613
171197	9
171198	6
171201	3
171243	2
171485	5
171518	4
171521	9
171590	1
171653	15
171656	24
171750	774
171753	556
171807	9
171809	94
171812	170
172442	2
172445	5
172454	1
172457	1
172483	11
172486	24
172487	403
172490	426
172524	3
172527	11
172595	14
172778	19
172781	14
172782	5
172785	4
172967	12
172970	15
173138	17
173141	6
173163	1
173165	23
173166	181
173168	23
173173	1
173175	23
173176	1
173178	45
173192	18
173195	13
173218	411
173230	3
173381	7
173384	5
173464	25
173467	19
173544	2
173547	6
173670	44
173673	51
173692	12
173695	10
173715	27
173724	24
173829	98
173832	55
173838	1
174040	1
174043	70
174111	33
174114	31
174474	5
174477	4
174659	2
174701	87
174704	47
174705	16
174708	8
174797	13
174798	15
174800	7
174893	1
174896	1
174901	7
174904	3
175037	13
175040	13
175189	21
175192	12
175221	6
175224	2
175319	43
175322	56
175357	26
175360	12
175382	3
175385	6
175499	4
175502	2
175538	1
175541	1
175617	1
175620	417
175688	1
175691	6
175694	24
175697	14
175716	11
175745	25
175748	18
175789	5
175792	18
175847	3
175850	2
176063	25
176066	23
176075	51
176078	85
176199	1
176202	2
176234	2
176394	4
176464	3
177010	1
177043	2
177046	3
177176	31
177179	25
177189	3
177192	1
177336	33
177339	58
177340	6
177343	6
177354	3
177357	12
177508	58
177511	107
177514	35
177569	24
177572	18
177712	9
177715	5
177725	12
177728	13
177744	24
177747	19
177865	34
178016	2
178019	1
178042	1
178045	3
178063	1
178066	2
178080	10
178083	29
178180	8
178183	167
178186	222
178230	20
178233	36
178255	128
178258	60
178275	3
178278	3
178357	21
178360	51
178396	7
178399	10
178449	23
178641	3
178695	101
178698	73
178777	11
178780	12
178848	114
178851	201
179108	12
179111	14
179181	2
179184	1
179188	2
179242	2
179245	1
179256	1
179332	5
179335	5
179373	29
179376	45
179463	10
179466	13
179469	327
179472	579
179548	4
179551	6
179608	11
179611	9
179857	1
179875	17
179878	6
180007	38
180010	85
180013	41
180026	25
180029	19
180050	5
180053	9
180088	6
180091	10
180099	11
180102	3
180178	2
180190	76
180193	142
180232	1
180235	55
180393	1
180396	1
180450	537
180453	275
180561	6
180564	9
180591	16
180605	679
180608	466
180618	15
180621	7
180842	26
180845	6
180994	1
180997	3
181022	32
181234	2
181237	12
181270	3
181273	2
181554	1
181557	9
181609	23
181612	16
181632	9
182102	4
182461	2
182464	11
182718	3
182735	11
182978	13
182981	17
183016	8
183019	4
183119	3
183221	74
183242	502
183245	311
[truncated: 44,704 more rows]

## Sheet: EMSH OXD TN1
genome accession number: NC_018143.2
chromosomal coordinates of transposon insertion/TA site	number of reads
2919	1
5127	3
9623	1
11620	4
11742	4
11745	4
11786	1
11789	2
13045	1
13167	1
13170	7
13371	7
15517	1
23725	2
26039	1
26199	3
29669	2
30970	1
31824	1
32776	1
33047	1
33216	2
33865	1
34876	4
35909	1
35912	2
36454	1
36457	4
36514	1
37355	4
37668	1
37751	1
37828	3
37831	1
38519	1
40027	1
40473	2
40476	1
40960	4
40963	7
42275	1
42278	1
44797	1
46468	1
46471	2
47362	5
47365	3
47461	1
48106	1
48110	2
48985	2
50024	1
50099	1
51610	4
51613	2
51909	1
52523	6
55522	1
55525	1
56056	2
56151	1
56154	1
63211	1
63880	2
63883	2
64177	1
65433	1
65545	2
65548	2
66031	3
66034	1
67123	2
67360	9
67363	4
68306	1
68320	3
69189	1
71154	1
71157	1
75609	1
75612	4
79321	4
79324	2
79916	5
80517	1
80608	1
81373	4
81892	6
81895	1
83737	1
84952	1
85112	3
86358	1
88228	3
88774	1
89267	1
89913	3
90100	1
94560	1
95462	2
96142	1
97889	3
97892	4
98296	1
98378	4
98609	1
98612	4
99019	4
99022	4
100979	2
103051	1
104156	1
104460	5
104583	5
104586	9
104610	2
105582	13
105585	28
105599	1
105602	3
105731	5
106319	1
106322	2
106351	2
106354	2
106366	1
106482	2
106803	21
106806	43
106937	3
106940	4
107027	2
107030	2
107035	7
107038	16
107327	1
107448	1
110469	1
110472	2
111144	1
111147	3
115074	2
115301	5
115460	1
120625	1
120790	1
121393	2
121396	4
122493	1
122835	1
122988	1
123825	1
123828	6
123902	1
129317	1
129320	1
129495	1
130695	1
130698	5
130928	1
133019	2
138170	1
139660	2
139663	1
140620	1
140945	2
142163	4
142718	1
143716	5
143719	1
143943	1
147197	1
148763	2
149464	2
149467	1
151358	1
156102	2
156242	1
156306	1
156312	1
160546	1
160636	1
161756	1
162208	2
163092	1
165279	3
165282	1
166256	1
170662	1
171185	3
171188	2
171193	2
171753	1
171804	1
171809	1
171957	3
172442	1
173138	2
173141	1
173670	2
173673	2
174111	1
174114	1
175224	2
175620	2
175691	1
177043	1
178186	5
178255	1
178695	1
178851	1
179469	1
179472	2
180010	2
180013	1
180031	1
180102	1
182978	2
183016	1
183019	2
183242	1
183441	1
183614	1
183790	1
183921	22
183924	11
184048	1
184051	1
184053	1
184723	1
184726	3
186140	9
186143	18
186174	6
186177	4
186413	4
186852	3
186926	1
186929	3
186935	1
186938	1
187232	2
187235	2
187289	1
187561	2
187598	3
187601	2
187775	1
187830	2
187833	5
187960	1
188010	1
188872	1
189061	1
189124	1
189157	1
189361	4
189382	1
189466	1
189760	1
190325	8
190328	6
190582	3
190594	2
191088	2
192165	1
192168	1
193656	1
193659	1
194930	2
195758	1
196455	10
196458	6
196487	2
196490	2
197088	11
197091	5
197389	4
197392	2
197419	1
197813	2
197816	3
198275	1
198278	2
198374	1
198380	1
198726	1
198888	1
198891	4
199082	9
199085	35
199401	1
199404	6
199437	4
199440	2
199526	4
200006	1
200008	1
200009	4
200097	2
200159	19
200162	36
200810	1
201038	15
201212	24
201215	15
201471	1
201518	17
201521	1
201921	1
202081	4
202626	9
202629	21
202650	31
202653	74
202673	12
202676	13
202755	16
202758	13
202836	3
202839	2
202897	1
202934	8
202937	8
203027	3
203030	1
203113	3
203143	1
203315	7
203318	11
203411	5
203414	7
203592	5
203595	11
203652	2
203655	2
203685	3
203688	6
203916	13
203919	2
204224	11
204227	13
204863	14
204866	12
205028	1
205431	1
205549	10
205552	17
205585	2
206059	1
206062	1
206126	3
206176	4
206179	7
206269	2
206632	1
206635	1
206662	1
206665	7
206792	1
206795	2
208007	1
208010	2
208148	9
208151	5
208204	1
208207	3
208793	2
209571	5
209574	8
209601	3
209604	5
209935	2
210596	1
212275	5
212278	6
214035	1
214038	1
214093	1
214265	3
214268	1
214337	1
214442	7
214922	1
216201	1
218382	3
218385	8
219294	1
219297	2
219609	2
222378	2
222385	2
222939	1
223009	1
223043	1
223348	4
223408	1
224132	3
224350	1
225905	1
226177	1
226365	1
226368	2
226384	3
226387	1
226632	2
227100	1
227559	1
227562	1
227684	2
227687	2
228473	4
229851	1
229854	3
230079	1
231068	6
231071	1
231552	1
231773	1
232447	2
232450	3
232540	1
232865	2
232868	3
233700	1
235214	1
239303	1
240305	1
241184	1
243947	1
244010	1
249620	1
249923	1
250487	4
250490	1
252903	2
252906	2
253619	1
254853	1
254856	1
254977	2
255309	1
255638	1
256081	1
256084	3
256381	1
258875	1
259939	1
260208	1
264315	1
265505	4
265508	1
267005	1
273053	1
274708	1
274941	1
276288	1
276804	1
276987	1
276990	3
277020	9
277023	5
277029	1
277032	1
277224	2
277227	1
277328	1
278120	1
278432	1
278860	3
278863	4
282620	1
282623	1
285786	1
288386	1
293510	1
293921	214
293924	160
294296	75
294299	98
294326	225
294329	231
294344	1
294398	37
294401	41
294521	3
294524	575
294527	2
294530	4
294775	572
294778	584
294850	15
294853	19
294944	565
294947	534
295250	4
295253	3
295593	3
295596	2
295673	375
295676	598
295722	752
295724	3
295725	1082
295727	2
295735	186
295738	249
298161	6
299228	8
299231	14
299466	9
299469	8
300777	1
300780	1
301311	2
301515	1
301656	7
301659	3
302079	7
302082	5
303048	1
308281	2
308409	1
308756	2
308774	1
308777	2
309629	1
311657	1
313539	1
315180	1
316262	1
318829	2
320801	1
320804	3
321035	3
321324	1
321327	3
321657	3
322996	1
322999	1
323024	1
323314	3
323977	1
323980	1
324557	1
324662	64
324713	235
324716	248
324876	7
324950	520
324953	544
325282	13
325285	4353
325509	10
325590	2
325593	5
325655	338
325658	242
325664	1059
325667	1089
325762	3
325765	4
325847	1
325850	1
325907	80
325910	92
325931	4
325934	381
326135	301
326138	384
326139	5183
326142	5527
326159	111
326162	86
326196	3
326199	2
328647	1
330877	1
332016	2
332178	1
332989	1
333222	1
338194	1
339828	1
340718	1
341810	2
341813	1
357154	3
358886	7
360022	3
360127	2
360492	1
360601	1
361591	1
363133	1
363238	3
363241	5
364176	1
364753	2
365920	2
368451	1
368721	1
368724	2
369744	1
369747	2
369752	2
369755	1
370313	1
370316	2
370995	1
371280	1
371283	1
371518	4
371537	3
373375	1
373994	2
374317	1
375759	1
378107	1
378278	2
378331	1
378334	1
378407	5
379283	1
379351	1
382876	1
383404	1
384486	1
385419	1
385982	1
387135	2
387597	4
387600	1
388389	1
389147	2
389312	1
390378	2
392171	1
395291	1
396421	1
396424	1
396462	3
397182	2
397217	2
397994	1
400731	1
401264	1
401411	4
401414	2
401415	1
401418	3
401502	1
401733	1
401873	1
404018	1
405860	1
409830	2
411661	1
412307	1
412409	2
412414	1
413595	2
413598	3
414492	1
414916	1
415670	2
416597	1
416651	1
419047	1
423734	1
424265	1
424977	1
425156	3
425726	1
426431	1
427146	1
427986	1
427989	1
428156	1
429075	1
429536	7
429539	7
429614	1
429626	3
430098	1
430124	3
431468	1
431498	1
431501	2
432095	1
432860	3
432863	3
432918	1
433257	2
433592	1
434636	1
434956	2
435434	1
438425	1
442384	1
443575	1
443698	1
445786	1
445789	1
447947	1
451382	3
452388	1
454220	2
454223	5
455964	1
456436	1
462219	4
462456	1
464717	4
464720	4
464992	1
465510	1
465513	1
468141	1
468879	3
469071	2
469240	1
471428	1
472682	1
472685	1
472859	1
473215	2
475344	1
475899	1
476055	1
476058	1
476316	1
479441	1
480316	1
480319	1
480341	1
480788	1
481820	2
484374	3
488800	1
488905	1
492361	4
492364	4
492721	1
496331	1
500066	9
500069	1
503275	1
503278	1
506422	1
506683	4
506686	3
513226	1
513842	1
515379	2
515662	4
515665	6
516229	1
516446	2
517252	1
519086	1
521422	3
521425	2
522234	1
522317	1
522320	2
526298	1
526301	5
526764	2
526767	2
527205	3
527523	2
527736	2
528327	1
528543	1
531841	1
531844	2
531993	1
532227	1
532230	3
532385	1
532573	3
532574	1
532734	1
532761	7
532764	2
534226	1
534414	1
534673	2
535260	2
535263	1
536750	1
538234	7
538453	2
538963	1
540952	2
540955	1
541066	1
543175	2
543178	2
544131	1
546808	1
547246	1
548150	1
548180	3
548225	1
548228	2
549335	1
549398	1
550803	3
550806	2
550826	1
550829	1
550832	3
552235	2
552502	1
552505	2
552553	1
554306	1
554642	1
554645	1
555509	1
555838	1
555841	4
555845	4
556266	1
556298	2
560328	1
560929	2
560932	1
562017	1
562363	1
562366	1
562420	1
562423	3
562469	1
562924	1
563239	1
563242	1
563248	2
563450	3
563469	11
564542	2
564545	3
564716	1
564977	3
565014	4
565626	1
565768	2
565771	2
566060	1
566883	3
566886	3
566987	1
567225	1
569222	1
569820	1
569823	1
570050	1
570053	4
570100	4
571648	1
571651	3
572429	3
572654	1
572657	2
572749	1
573180	1
573183	2
573480	4
574457	1
574703	2
577015	1
577089	7
577092	9
577285	1
577396	1
581102	1
583869	1
584390	1
584546	2
584549	1
585171	1
585372	2
585375	1
586235	1
586339	1
588275	4
588788	1
588870	2
588917	1
589187	1
589475	3
589478	2
591619	1
592538	1
592787	2
593386	3
593389	1
594634	1
596732	1
596850	1
597501	2
597726	2
597782	3
597851	1
600105	2
600108	4
600313	1
600345	1
600348	1
600386	3
600389	1
605645	1
606295	1
607626	3
607629	2
607773	7
607776	3
607777	3
607780	6
608199	1
608640	1
608899	1
608989	1
609321	1
610303	1
610938	1
610941	1
611391	1
611634	1
612993	1
613130	1
614832	2
616813	2
623446	1
623863	1
623866	3
624196	1
625010	1
625106	1
625568	1
626813	1
626816	3
629834	1
635941	1
636004	2
636765	1
637490	2
637553	1
637602	1
637605	3
637945	2
638260	2
638467	6
638470	1
638948	1
638955	1
641050	4
641053	11
642224	2
642398	4
642401	1
644177	2
644180	1
650548	1
650751	1
653778	1
653781	1
654745	1
654984	1
657021	1
658381	1
658737	5
658740	1
659216	1
659336	2
659614	1
659617	2
660942	1
660945	3
663220	1
665135	2
665138	3
665548	1
666247	1
667269	1
667272	3
667477	1
669167	1
669893	1
670033	2
670036	1
675442	1
675445	2
675993	1
676089	37
676982	3
676985	2
677863	2
678557	2
678560	4
678752	1
678755	3
678887	1
678890	2
679215	1
679222	6
681061	4
681064	1
684051	1
685161	1
686566	1
688614	2
689931	1
694053	1
694397	4
694400	4
694679	1
695024	1
695027	1
695794	2
697196	1
699343	1
699501	1
701737	1
702345	4
705718	1
706183	1
708709	4
709207	1
709532	6
716362	1
716365	2
716400	1
717118	1
728820	1
728823	5
728910	6
728913	11
729261	3
729696	1
729699	1
729976	1
729979	2
730174	1
730371	1
730849	1
733356	1
733657	1
733721	2
736248	3
736251	1
736283	1
737615	1
739116	1
739939	1
740167	1
740170	1
741095	1
741098	2
743036	1
743348	2
747248	1
747251	1
749241	1
749244	1
749801	1
750530	7
750533	14
750560	1
750659	1
750936	5
750939	2
752025	20
752028	9
753447	1
753643	1
753737	1
754942	1
756499	2
756844	4
756847	2
769687	2
770575	3
771705	2
771869	1
771963	1
773420	1
776417	3
778501	1
779426	1
780584	1
784732	1
787101	2
789146	1
789974	2
790103	1
792100	1
792103	1
795786	1
795840	1
798055	2
806460	1
806736	2
806739	1
806789	1
807024	2
809883	1
809886	1
810419	2
810422	2
810769	1
810860	1
812839	1
813176	1
815630	1
815774	1
815819	2
816253	1
816934	1
820090	1
822418	1
823685	3
825153	1
827188	1
827191	2
827925	1
827928	3
829069	2
831244	1
831871	1
832343	1
833892	1
834184	2
834191	1
841155	1
841570	2
842318	1
846132	2
846135	2
846419	1
847154	1
847313	1
847433	2
847871	4
847874	3
848102	1
848105	1
850001	2
850004	2
850086	2
850246	1
850347	1
850350	4
850862	2
850865	2
851482	2
852361	1
852812	3
855080	1
855876	1
857534	1
857537	4
862666	1
862940	1
862983	1
863819	4
864555	2
866038	1
866041	3
868894	3
868897	4
869292	4
869295	2
871626	2
872039	1
875532	1
876464	4
876467	3
879684	1
881147	2
881150	2
882884	1
883407	1
883856	1
886034	1
886085	1
886088	1
886841	1
886850	1
888457	1
888946	1
889405	1
890156	1
890736	1
891478	1
894646	1
894649	3
895433	36
895436	36
895720	2
895723	2
898390	1
898786	1
898882	1
900435	7
900438	3
900727	1
901041	3
901180	1
901371	1
901560	1
902123	1
902134	1
904822	1
904908	2
904911	1
905899	1
907127	1
909598	2
911427	1
911506	2
914213	2
914624	1
914627	3
914962	1
914965	3
915130	2
915193	1
915196	2
915222	1
915415	3
915418	1
915427	4
915430	4
915431	2
915434	4
917485	1
919647	4
919650	2
919724	1
920089	2
920209	1
921443	1
921455	1
922854	1
923045	1
923327	1
923330	1
923485	1
923582	1
923585	1
923872	1
924863	1
930173	1
930306	1
930881	1
931423	1
931934	1
932242	1
935983	1
937949	1
939450	4
940573	1
941668	1
942965	1
944317	3
944320	1
945150	1
945153	5
946142	1
946145	2
946796	1
947743	2
948483	2
948486	2
948576	1
948587	1
949073	3
950599	1
950602	2
951213	1
951391	6
951394	3
952156	1
952312	2
952977	2
953479	1
954967	3
955021	1
961454	1
963025	1
963116	1
963798	1
965466	2
965522	1
965537	1
965567	2
965570	1
965630	1
965797	1
966009	3
966012	10
966674	1
966677	2
966875	1
967775	1
970242	2
970979	1
971015	1
971144	1
972119	1
972193	2
972196	4
972552	2
974136	1
974139	1
976046	9
976049	5
976060	1
976608	8
976708	11
976745	7
976748	5
976752	5
976755	1
976818	3
976821	1
977781	3
977910	1
978243	1
978928	2
979634	2
981416	5
981419	1
982567	1
982570	3
986545	2
987730	3
987733	1
988243	2
988289	1
990191	3
990194	1
990870	1
990873	1
990874	1
990877	1
992887	1
995272	1
997896	1
998818	1
999344	3
999347	9
999352	1
1001842	1
1004399	1
1004402	1
1004504	2
1008196	3
1008197	1
1008200	2
1008844	5
1008847	7
1009178	2
1009323	1
1012301	1
1012304	2
1012879	2
1012882	2
1013583	2
1015155	1
1015406	1
1015869	2
1015872	1
1019136	1
1019516	3
1019519	1
1020096	1
1020557	1
1020878	2
1021720	1
1022914	3
1023002	3
1025147	3
1025191	4
1025194	1
1026179	1
1026182	1
1027269	1
1027272	1
1027705	1
1028825	1
1029540	1
1030234	1
1030237	1
1030806	2
1031536	2
1031539	1
1032636	2
1038028	1
1039601	3
1039832	3
1040156	1
1040173	1
1040176	1
1040298	1
1040642	3
1040645	1
1041179	1
1041182	1
1041252	1
1041258	2
1041389	1
1042047	1
1042456	12
1042459	17
1043618	1
1043681	1
1044118	1
1044641	1
1044818	1
1045133	1
1045380	1
1045383	1
1048430	1
1052451	1
1052454	3
1053240	1
1057327	1
1057373	6
1057376	2
1061056	1
1061565	1
1061724	1
1061763	4
1061924	1
1061927	127
1061945	1
1065239	7
1065423	3
1065443	1
1065470	1
1065473	2
1065703	3
1065988	3
1067555	1
1069745	1
1071209	1
1073342	1
1073345	1
1073830	1
1073958	1
1073961	2
1075428	14
1075431	8
1075463	1
1075998	1
1077669	1
1077966	1
1078378	1
1078536	1
1078539	2
1078545	2
1080823	1
1082831	2
1082834	3
1083665	1
1084264	2
1084573	1
1090099	1
1090321	2
1092536	1
1092548	2
1093007	1
1093103	1
1093109	5
1093112	6
1093665	2
1093668	2
1094333	1
1095087	1
1096425	3
1096428	1
1098992	2
1099103	1
1100501	2
1101803	1
1105055	1
1105147	24
1105150	82
1107076	2
1107436	1
1108114	1
1108117	2
1108491	100
1108494	107
1108497	2
1108500	1
1108547	4
1108559	6
1108562	18
1108641	6
1108644	4
1108900	1
1113294	1
1114306	2
1114309	2
1114393	1
1116743	3
1116746	2
1116859	1
1116970	1
1118037	1
1118040	1
1118164	1
1126306	1
1128048	1
1130245	1
1131208	28
1131211	33
1131458	11
1131461	8
1131465	1
1132026	4
1132029	3
1132116	2
1132119	13
1132131	1
1132159	5
1132195	6
1132198	6
1132269	1
1132272	1
1132363	5
1132399	2
1132567	1
1132715	2
1132814	1
1132817	1
1132825	2
1132828	2
1132833	1
1132836	1
1132873	1
1132894	1
1132922	6
1132925	11
1132965	4
1132969	1
1135131	1
1137395	1
1140225	1
1144112	1
1151088	1
1153491	1
1153654	1
1157862	1
1160464	1
1162174	1
1162177	1
1162429	1
1162499	1
1162950	1
1163120	5
1165598	2
1165770	1
1165785	3
1165788	1
1166175	2
1166178	3
1166386	1
1167740	1
1168256	1
1169357	1
1169685	1
1169909	5
1169912	2
1170672	1
1170675	1
1170783	2
1170786	1
1175386	1
1175535	1
1175979	1
1177764	1
1177776	1
1177876	1
1178280	1
1179685	1
1179893	1
1180435	2
1181547	2
1184600	1
1187116	1
1187338	3
1187651	2
1187654	1
1190244	1
1190762	1
1190765	1
1191749	1
1192827	2
1193247	7
1193250	6
1195043	2
1196133	1
1196136	2
1198872	2
1200671	1
1202621	1
1202624	1
1202970	1
1203794	1
1205879	2
1205882	5
1206799	2
1211405	1
1211408	3
1211560	1
1212609	2
1214242	2
1214245	3
1214499	2
1215218	1
1215423	1
1215426	4
1215439	1
1215620	1
1215623	2
1215879	1
1216056	2
1216059	2
1228246	2
1230461	1
1230476	3
1230479	5
1231290	1
1232495	1
1232842	1
1232991	2
1232994	1
1233578	3
1233581	4
1235753	1
1237415	1
1237424	1
1237427	2
1237433	1
1237436	2
1241397	2
1246957	1
1247650	1
1247653	2
1254703	1
1257156	1
1258005	1
1258008	2
1262064	3
1262067	2
1262560	1
1262563	2
1266482	1
1266485	2
1266495	1
1266871	1
1266985	1
1267005	2
1267036	2
1267039	2
1267322	1
1268549	1
1268791	4
1269106	1
1269458	1
1269461	1
1269654	1
1270735	1
1271362	1
1271861	2
1271864	2
1271913	1
1272326	1
1272329	1
1272928	3
1273720	5
1273723	3
1273773	2
1273776	2
1275087	4
1275561	1
1277044	2
1279467	43
1279659	1
1279950	1
1281079	61
1281082	48
1281581	2
1285524	1
1286561	4
1287181	1
1288016	3
1288988	1
1288991	1
1291387	1
1292577	1
1293455	1
1293971	1
1294073	2
1294076	1
1294629	1
1294904	1
1299402	1
1301461	1
1301464	1
1302426	1
1305677	3
1305680	1
1305877	4
1306007	1
1308678	4
1310280	1
1311746	1
1311788	3
1312161	1
1312164	2
1312281	1
1312284	2
1317880	1
1317883	1
1325459	1
1325704	1
1325707	1
1327297	1
1327527	1
1332064	6
1332067	13
1332920	1
1333301	1
1333612	3
1334115	5
1334923	1
1336441	1
1337154	1
1339405	1
1340497	2
1342127	2
1342130	1
1342351	1
1342882	1
1343538	3
1343961	1
1345180	1
1348046	2
1348198	1
1348201	1
1349119	5
1349122	3
1349148	1
1349334	21
1349337	26
1349562	3
1349776	36
1349779	31
1350072	1
1350243	3
1350468	4
1350909	3
1350924	2
1350927	4
1351017	2
1351045	63
1351048	45
1351068	609
1351071	622
1352762	1
1353699	1
1353702	5
1353888	3
1353891	2
1353979	3
1354473	3
1354476	3
1354522	3
1354525	1
1354549	1
1354552	1
1354597	1
1355607	1
1356662	3
1357053	1
1358905	2
1358908	1
1359720	2
1361800	2
1365696	1
1365888	2
1371239	2
1371479	1
1371548	1
1371551	2
1371705	2
1373920	1
1373923	1
1373987	1
1374240	1
1374282	1
1374919	1
1374922	2
1374944	1
1374947	1
1375161	1
1376680	1
1376904	1
1377640	1
1381997	1
1382074	1
1383130	2
1383133	1
1384685	1
1385512	1
1385515	2
1386125	1
1386601	1
1387175	1
1387178	3
1387225	8
1387228	1
1388854	1
1390434	1
1393519	1
1393815	24
1393818	31
1394183	2
1394186	3
1394220	3
1394223	2
1395304	1
1395717	1
1396379	1
1396596	1
1397789	2
1397792	1
1405604	1
1406349	1
1406352	1
1409175	1
1409760	2
1409763	1
1410981	1
1411351	1
1414305	1
1414308	1
1414387	1
1414514	1
1415250	1
1415253	3
1417416	2
1418020	1
1418207	3
1418249	1
1419610	2
1420802	1
1421277	5
1421280	3
1421570	1
1423826	1
1425990	1
1429657	2
1430039	2
1431465	1
1431599	2
1437368	1
1437371	3
1441499	1
1441655	1
1442199	2
1442259	2
1442262	2
1442453	1
1442737	2
1443190	7
1443193	14
1443824	1
1444306	1
1445242	2
1445532	2
1453035	1
1453038	1
1455089	1
1455092	2
1459555	1
1459558	3
1459669	2
1459703	1
1465815	2
1465818	3
1468180	1
1469971	1
1476486	1
1476736	1
1477062	1
1477626	1
1477629	1
1480507	2
1480510	2
1482214	1
1482335	5
1482338	6
1483332	1
1484280	1
1484283	2
1484300	1
1485421	1
1497628	1
1497828	1
1498136	2
1499692	2
1500008	2
1500011	2
1500488	7
1501355	1
1502654	3
1502657	2
1502907	3
1503081	2
1503084	1
1503121	13
1503124	7
1503408	1
1503758	1
1503761	1
1504045	1
1504047	1
1504048	1
1504050	3
1504296	1
1504299	1
1504360	3
1504363	1
1504410	1
1504678	1
1504876	1
1505006	1
1505009	1
1505936	1
1506747	12
1506750	12
1508193	16
1509025	2
1509028	3
1509179	5
1509182	4
1510051	2
1510213	1
1512659	3
1512662	2
1512900	3
1519174	1
1521769	3
1524378	3
1525560	1
1527635	8
1528135	2
1529188	1
1530034	4
1530953	1
1530956	1
1531088	3
1531091	1
1532478	2
1533462	1
1534200	1
1534203	1
1535420	4
1536968	1
1537599	1
1537602	1
1538876	1
1538879	1
1538920	1
1539775	1
1542465	1
1542492	1
1542523	1
1542938	1
1545326	1
1546564	5
1547126	1
1547347	1
1547356	1
1548878	1
1548898	1
1549484	2
1549969	1
1550011	1
1551211	1
[truncated: 3,343 more rows]

## Sheet: EMSH OXD TN2
genome accession number: NC_018143.2
chromosomal coordinates of transposon insertion/TA site	number of reads
5127	4
5130	3
11620	1
11674	1
11677	1
11742	4
11745	10
11786	1
11789	1
13024	1
13045	1
13048	2
13167	5
13170	7
13368	2
13371	3
14079	1
15517	1
19109	1
20236	1
23809	1
25729	1
26039	2
26042	1
26199	3
28514	1
29669	9
30678	1
31152	2
31155	1
32776	1
33047	1
33057	2
33216	2
33219	2
33862	1
33865	2
34184	1
34876	3
35263	2
36454	2
36457	1
37352	1
37355	3
37828	2
37831	1
40027	2
40140	1
40473	2
40960	2
40963	4
46468	4
46471	3
47362	4
47365	3
47458	1
47461	1
48103	1
48449	1
48452	3
48985	2
49387	1
51610	4
51613	3
51909	1
52129	1
52523	2
52526	2
52773	1
52828	1
53151	2
53154	2
56056	2
56154	2
56841	2
57042	1
57274	1
60269	1
63211	1
63883	1
65545	2
66031	1
67123	2
67360	9
67363	8
68218	1
68373	1
68376	1
70842	1
71154	5
71157	1
75609	3
75612	1
79321	7
79324	4
80608	1
80611	1
81373	1
81892	5
81895	1
83110	1
84829	1
84952	2
85109	2
85112	1
86677	1
87614	1
88228	2
88426	2
89270	1
89913	1
89916	2
90097	1
90100	1
90289	1
90493	1
94563	1
95462	1
97889	2
98296	3
98378	2
98609	2
98612	1
99019	1
99022	7
100016	3
100979	1
102455	1
103048	1
103051	2
104460	1
104463	1
104583	3
104586	13
105582	16
105585	29
105599	3
105602	3
105731	4
106322	3
106351	1
106354	3
106366	2
106482	5
106801	1
106803	29
106806	38
106937	1
106940	4
107030	1
107035	9
107038	8
107324	1
107327	3
110090	1
110093	2
113579	1
115074	1
115077	1
115304	1
115460	1
121393	1
121396	1
121762	1
121769	1
122538	1
122541	1
123825	1
123828	6
129320	3
130695	4
130698	3
133016	1
133019	1
134397	1
134466	1
134469	1
138616	1
139663	2
140948	1
142163	3
142166	4
143716	4
143719	5
148763	4
148766	4
149219	2
149464	2
149467	5
155962	2
156102	2
156105	1
156239	1
156242	3
161604	1
161753	1
162208	8
162642	1
163259	1
164414	1
165279	1
165282	1
167147	1
167398	2
169302	1
171185	6
171188	2
171193	1
171750	1
171753	2
171809	2
171812	2
171957	2
173138	4
173141	5
173166	1
173218	2
173670	1
173673	2
173724	1
175620	5
176075	1
177339	1
177572	1
178186	4
178255	2
178258	4
178695	3
179472	1
180013	1
182978	1
182981	1
183221	1
183245	2
183444	1
183921	13
183924	13
184051	1
184053	1
184723	2
184726	3
186140	24
186143	22
186174	2
186177	4
186413	3
186416	1
186849	1
186852	1
186926	1
186929	1
186932	1
187040	1
187232	2
187235	2
187268	3
187561	1
187598	2
187601	1
187772	1
187775	1
187830	2
187833	2
187960	3
187963	3
188010	2
188019	1
188872	2
188875	1
189124	1
189127	3
189154	1
189157	1
189361	5
189364	1
189547	1
190325	1
190328	8
190579	1
190582	1
191088	2
191091	2
192165	1
193414	1
193417	1
194930	3
194933	1
195557	2
195560	1
196428	1
196455	7
196458	7
196490	3
197088	11
197091	14
197389	3
197392	3
197419	1
197816	5
198275	4
198278	2
198374	1
198380	1
198729	1
198888	9
198891	3
199082	28
199085	42
199401	4
199404	9
199440	4
199526	4
199529	2
200006	1
200008	1
200009	4
200097	1
200159	11
200162	19
200807	3
200810	1
201038	10
201212	13
201215	25
201515	1
201518	12
201591	1
201594	1
202084	2
202626	5
202629	15
202650	59
202653	59
202673	12
202676	15
202755	13
202758	18
202836	3
202839	1
202934	8
202937	11
203027	3
203030	6
203113	3
203143	2
203315	16
203318	13
203411	2
203414	4
203592	7
203595	6
203652	4
203655	2
203685	3
203916	7
203919	4
204224	10
204227	12
204774	1
204863	12
204866	8
205431	2
205434	2
205549	14
205552	9
205585	2
205588	3
206126	2
206176	7
206179	10
206269	15
206383	1
206632	3
206635	1
206662	4
206665	4
208007	3
208010	4
208148	14
208151	7
208204	4
208207	7
208793	1
209328	1
209571	11
209574	6
209601	4
209604	3
209914	1
209935	3
212275	5
212278	7
213161	1
214035	1
214038	2
214223	1
214265	1
214439	4
214442	6
214922	1
214925	4
218382	3
218385	10
218526	1
218537	1
218607	1
218614	2
219609	1
221815	1
222382	1
223348	4
223351	2
223405	1
224132	1
224135	2
224353	1
225464	1
225467	1
225905	2
226365	1
226368	1
226384	1
226387	3
226635	1
227140	1
227562	2
227684	1
227687	3
228473	2
229557	1
229560	1
229851	1
229854	2
230079	1
230082	1
231068	2
231071	7
232447	2
232450	1
232865	3
232868	4
233700	1
233703	4
233950	1
235214	1
235479	1
240302	1
240819	1
241181	1
243110	1
243254	3
243894	1
243897	1
244007	1
244010	1
248944	1
250487	2
250490	5
253616	2
254977	2
256081	2
256084	2
259936	1
264315	1
265505	11
265508	5
269878	1
273056	1
274608	1
276804	1
276807	1
276990	1
277020	16
277023	10
277032	1
277761	1
278432	2
278860	4
278863	4
282620	3
288383	3
288386	1
293921	251
293924	154
294296	129
294299	108
294326	204
294329	376
294341	2
294398	53
294401	32
294521	2
294524	565
294527	2
294530	3
294775	555
294778	853
294850	14
294853	18
294944	605
294947	848
295250	4
295253	4
295593	6
295596	6
295673	565
295676	835
295722	1068
295724	2
295725	1036
295727	1
295735	259
295738	218
296935	1
298161	3
299228	11
299231	20
299466	11
299469	10
300321	1
300777	1
300802	1
301311	1
301656	8
301659	5
302076	1
302079	11
302082	15
302176	1
302810	1
308284	2
308756	4
312161	1
313584	1
315177	1
315180	2
318829	2
320325	1
321324	3
321654	1
321657	1
322122	1
322638	1
322999	1
323027	1
323123	5
323309	2
323311	2
323314	3
323359	1
324662	109
324713	274
324716	269
324876	3
324950	725
324953	618
325282	22
325285	4509
325509	12
325590	4
325593	6
325655	392
325658	257
325664	1466
325667	1065
325762	4
325765	1
325847	1
325907	63
325910	124
325931	5
325934	385
326135	443
326138	342
326139	7593
326142	5273
326159	191
326162	65
326199	3
326368	1
328535	1
329744	3
329747	3
330877	1
331082	1
332016	4
332019	2
332181	1
332248	1
332986	2
333222	3
336384	7
338191	1
338194	1
338891	1
339579	2
340183	1
341735	1
341810	2
341813	3
357151	1
357154	2
358886	3
359979	1
360489	1
360519	1
361226	1
361591	1
363238	6
363241	3
365920	1
368721	2
369744	2
369747	4
369807	2
370313	3
370370	1
370373	1
370536	1
370995	2
371280	2
371283	2
371518	5
371534	1
372405	2
372408	1
372666	1
373372	2
373375	3
375759	1
377377	2
378331	1
378334	2
378407	7
378410	2
378694	1
379348	1
382708	1
383550	1
387135	5
387600	3
388389	1
389150	1
389312	1
390378	5
390381	7
391302	1
392119	1
392171	1
393932	2
396421	1
396462	1
397179	2
397217	1
397492	1
401411	1
401414	1
401415	2
401418	8
401502	1
404108	1
409830	1
411006	1
412409	1
412411	1
412414	1
413595	1
413598	1
414489	2
414884	1
415667	1
415670	1
416021	1
416147	1
416594	2
416597	2
418987	1
419047	1
423734	1
424265	1
424632	2
424635	1
425063	1
425153	1
425156	1
425729	1
425811	1
427143	3
427146	1
427789	1
429536	4
429539	5
430121	3
430124	2
431438	2
431498	1
432428	1
432860	1
432863	1
432918	1
433225	1
433257	5
434633	1
434681	1
434956	1
435431	1
439736	1
440958	1
443917	1
445662	1
445665	1
445789	1
447721	1
447950	1
449611	2
451382	3
451495	1
452388	3
453188	2
454220	2
454223	6
455961	1
456439	1
462219	2
462435	4
462438	1
463593	1
464717	3
464720	8
465510	2
465513	6
469074	1
469743	1
472859	2
475347	2
476055	1
476319	1
477492	1
479441	1
480316	1
481820	1
484371	1
484374	1
488384	1
490066	1
491682	1
492361	1
492364	2
492721	2
492724	2
496523	1
500066	5
500069	4
500172	1
503275	1
503278	1
504868	3
506415	1
506419	1
506683	2
506686	3
506874	1
515326	1
515379	1
515662	3
515665	6
516229	1
517368	1
519086	1
520806	1
521422	1
521771	1
522317	4
522320	2
522384	1
524252	2
526764	2
526767	4
527205	3
527523	2
527733	2
528289	1
528327	1
528546	1
531841	2
531844	1
531996	1
532230	2
532323	1
532324	1
532388	1
532571	2
532576	1
532764	6
534411	2
534414	1
534670	1
535212	1
535215	3
535260	1
535375	1
536068	1
536747	1
537541	1
538453	1
538557	1
538960	2
540952	2
540955	3
543178	1
544131	1
544134	1
548183	4
548225	2
548228	2
550803	2
550806	1
552213	3
552235	1
552238	2
552263	1
552502	1
552553	1
555376	1
555838	5
555841	4
555845	4
556295	3
556298	3
557531	1
558813	1
560670	1
560929	3
560932	1
562307	1
562363	1
562364	1
562366	1
562420	1
562423	2
562469	2
563450	1
563453	1
563469	14
563580	2
564545	2
564716	4
564977	4
564980	1
565014	8
565020	3
565263	1
565266	1
565374	1
565623	1
565768	1
566060	1
566118	1
566883	1
566886	1
566967	2
566984	1
566987	2
567225	2
569222	1
569225	1
569413	1
569823	1
570050	2
570053	2
570100	2
571348	1
571648	3
571651	3
572429	4
573180	4
573183	1
573477	2
574457	1
576855	1
577015	1
577018	2
577062	1
577089	5
577092	12
577162	1
578005	1
578914	1
581881	2
582153	1
584546	2
585372	1
585375	2
588278	3
588791	1
588870	5
588920	1
589475	3
589478	4
591463	1
591579	1
591622	1
592787	1
593386	3
595403	1
596732	1
596847	1
596850	1
597498	3
597501	2
597723	1
597779	2
597782	4
600105	1
600108	2
600310	1
600313	1
600348	2
600389	2
602313	1
607626	1
607776	1
607780	2
608899	2
608992	1
609219	1
609453	1
611391	1
611394	2
612560	1
612993	1
613790	1
614832	2
616813	1
617550	1
621110	1
623866	1
625516	1
625565	1
626813	2
626816	3
629283	1
635938	2
635999	1
636001	2
636004	7
636768	1
637490	1
637602	1
637605	2
637639	1
638260	2
638464	1
638467	4
638470	3
638948	1
638994	1
639306	1
641050	4
641053	11
641471	1
642224	2
642401	3
650545	1
650548	3
650748	1
650751	1
653778	2
654745	2
654981	7
658101	2
658381	1
658384	1
658737	2
658740	3
659213	2
659216	1
659336	4
659339	3
659442	1
659614	1
660942	1
660945	3
662048	1
663217	1
663220	2
664509	1
664924	1
665135	2
665138	2
665548	1
667272	1
667528	1
668287	1
670030	2
670033	2
675442	2
675445	4
676086	1
676089	48
676383	1
676470	1
676982	1
676985	1
677602	1
677863	1
678557	3
678560	7
678752	1
678755	3
679215	1
679222	1
681061	4
681064	1
685929	1
688614	1
689928	1
692271	1
694053	2
694341	1
694397	3
694400	2
695024	1
695027	1
696134	1
696137	1
702345	3
702348	3
708139	2
709529	5
709532	1
710590	1
716365	4
717432	2
718025	1
719307	1
724903	1
727164	1
728823	5
728910	3
728913	15
729261	2
729264	2
729976	1
730174	1
730374	1
730377	1
730849	1
731986	1
733332	1
733356	1
733658	2
736248	3
736251	1
736328	1
736667	1
739116	1
739119	1
739434	1
740167	1
740170	1
741095	3
741098	2
743036	1
743348	2
743351	1
747251	1
747259	2
750530	11
750533	9
750656	1
750936	3
750939	5
752025	15
752028	24
752599	1
753447	1
753450	3
753513	1
753660	1
754942	2
754945	1
756499	1
756844	3
756847	7
767299	1
768254	1
769687	1
769690	2
770575	2
771866	1
771963	1
772778	1
773404	1
776417	1
777929	1
777932	1
778306	2
779609	1
780587	1
782462	2
784727	2
784732	1
784735	2
786288	1
786291	1
787098	1
787101	3
788319	2
789146	1
789974	5
790414	1
792103	2
798052	1
806739	2
808149	2
810419	3
810422	2
815819	1
815822	5
816256	1
817328	1
817705	1
826667	1
827188	3
827191	1
827925	1
827928	2
829840	1
831244	4
831247	1
831720	2
831871	1
832418	1
834187	2
834191	1
837586	1
838714	1
839334	1
839631	1
841152	3
841155	1
842023	2
845034	1
846419	1
846515	2
846706	1
847154	1
847871	3
850001	2
850004	4
850086	1
850089	1
850246	1
850347	1
850350	2
850415	1
850862	1
850865	4
851482	1
852361	1
852364	1
852812	1
855077	1
855080	1
855873	3
856425	1
858870	2
862738	1
863816	3
863819	3
864552	1
866038	2
866041	4
868894	3
868897	4
869292	4
869295	3
871626	1
874505	1
874508	2
874903	1
876467	1
881147	2
884234	1
886031	1
886116	1
886579	1
886841	1
887368	1
888457	1
890153	1
891475	2
893837	1
894414	1
894646	2
894649	1
895433	57
895436	43
895719	1
895720	3
898390	1
900435	6
900438	3
901038	1
901153	1
901371	2
901563	1
902120	1
902131	1
904819	1
904908	1
904911	1
906056	1
908530	1
909220	2
909390	2
909598	5
914213	1
914216	1
914627	2
914867	1
915088	1
915130	4
915219	1
915415	1
915418	1
915427	4
915430	4
915431	3
915434	1
916336	1
916339	1
917485	1
919647	3
919650	3
919724	5
920092	4
921455	1
922092	1
922095	2
922344	1
922744	1
922900	1
923045	3
923714	1
924863	2
924962	1
927843	1
929744	1
930170	2
930231	1
930547	1
931342	1
931423	2
932239	1
932534	1
932908	2
933923	1
934296	1
935684	2
936799	1
936802	1
937116	1
937949	2
937952	2
939447	3
940554	2
943758	1
944320	3
945150	3
945153	5
946059	1
946145	1
946799	1
947743	1
948486	1
949073	3
949856	1
950599	2
951213	4
951391	6
952309	2
952536	1
952980	1
954967	1
961451	1
961454	1
961730	1
961733	1
965466	1
965469	2
965522	2
965567	1
965672	1
965915	1
966009	5
966012	5
966674	1
966677	4
966875	2
969004	1
971012	2
971965	1
972193	1
972196	2
972552	7
973104	1
974136	1
974139	2
976046	6
976049	15
976215	1
976218	3
976608	6
976708	17
976745	10
976748	5
976752	5
976755	3
976812	1
976818	1
976821	1
976863	1
977086	1
977781	2
978833	1
981416	1
981419	2
982567	5
982570	4
987178	1
987730	1
987733	3
988240	1
988243	1
988289	1
988348	1
988678	1
990191	1
990194	1
990870	1
990877	1
993463	1
995272	1
996447	1
999344	7
999347	7
1001756	1
1002149	1
1002955	2
1004373	2
1004394	1
1004504	1
1004507	1
1006764	1
1008173	1
1008195	1
1008196	3
1008197	1
1008200	1
1008844	4
1008847	10
1009178	2
1012301	1
1013792	1
1015152	1
1015406	2
1015409	1
1015869	3
1015872	6
1018827	1
1018830	1
1019519	1
1020099	1
1020557	2
1020560	1
1020875	1
1020878	1
1020881	5
1021720	1
1022911	5
1022914	4
1023002	2
1023005	2
1025098	1
1025101	2
1025191	4
1025194	2
1026179	2
1027272	1
1027705	1
1027708	2
1029353	2
1030234	1
1030237	2
1030806	2
1032636	3
1032639	5
1038599	1
1039601	3
1040173	1
1040176	1
1040298	2
1040642	2
1040645	3
1041179	2
1041389	1
1042050	1
1042456	10
1042459	22
1042709	1
1043618	2
1043621	1
1043681	1
1044641	1
1045380	1
1045383	1
1051422	1
1052451	2
1052454	2
1052736	1
1052895	1
1052923	1
1053237	2
1057324	2
1057376	4
1060669	1
1061612	1
1061763	3
1061924	1
1061927	112
1061942	3
1065136	1
1065239	1
1065420	3
1065423	8
1065470	1
1065473	4
1065985	1
1073961	2
1074251	1
1075428	12
1075431	15
1077124	1
1077669	1
1077851	1
1077854	2
1078378	1
1078536	3
1078545	8
1080820	3
1080823	3
1082740	1
1082831	3
1082834	6
1084261	1
1090321	1
1092533	1
1092536	1
1092539	1
1093100	2
1093109	2
1093112	7
1093407	1
1093665	6
1093668	1
1094333	1
1095084	1
1096221	1
1096425	4
1096428	1
1098992	1
1099103	1
1099307	1
1101803	1
1105055	1
1105147	62
1105150	89
1106655	1
1106707	2
1107073	2
1107076	1
1107436	2
1108114	1
1108117	3
1108163	1
1108491	137
1108494	129
1108497	2
1108500	2
1108547	2
1108559	14
1108562	15
1108641	3
1108644	6
1108900	1
1114306	6
1114309	2
1114720	1
1116743	1
1116746	2
1116970	1
1118037	4
1118040	2
1131208	34
1131211	47
1131458	10
1131461	7
1131465	1
1132026	2
1132029	4
1132116	5
1132119	8
1132128	1
1132159	2
1132162	4
1132195	13
1132198	6
1132269	3
1132363	8
1132399	1
1132567	3
1132712	4
1132715	1
1132814	3
1132817	4
1132825	1
1132833	3
1132836	7
1132873	3
1132876	1
1132922	8
1132925	12
1132965	4
1132968	2
1132969	2
1135131	1
1135281	1
1135284	2
1140827	1
1140830	1
1142599	2
1145858	1
1150314	1
1151091	1
1152172	1
1153494	1
1157865	1
1157991	2
1158060	1
1160464	1
1160818	1
1162024	1
1162177	3
1163120	3
1164261	3
1165598	4
1165601	4
1165785	4
1165788	4
1166175	2
1166178	2
1166923	2
1167743	1
1168447	1
1169685	2
1169688	1
1169909	1
1170463	1
1170783	1
1171475	1
1171478	2
1173239	1
1174887	1
1175116	1
1175119	1
1175386	5
1175538	2
1175979	1
1176019	1
1176378	1
1176760	1
1177873	1
1177876	2
1178001	1
1178280	1
1178761	1
1179808	1
1179811	1
1179893	1
1180435	1
1180438	1
1180530	1
1181169	1
1181547	2
1184563	1
1184566	1
1187113	2
1187116	2
1187642	1
1187651	1
1189228	1
1190169	1
1190762	1
1191746	2
1192824	2
1193247	2
1193250	5
1195040	1
1195043	1
1195254	1
1196133	2
1196136	2
1196253	1
1199694	1
1200902	1
1201422	1
1201644	2
1202384	1
1202970	1
1202973	1
1205879	3
1205882	1
1205944	1
1206799	1
1211405	1
1212689	1
1214242	3
1214245	3
1214703	1
1215423	4
1215426	3
1215623	1
1215699	2
1215702	2
1215879	1
1215882	1
1216056	2
1216059	2
1217043	2
1217046	1
1218789	1
1218792	1
1226123	1
1228246	1
1230464	1
1230476	1
1230479	3
1231290	1
1232495	1
1232839	1
1232991	3
1233581	1
1235753	3
1235756	1
1237415	3
1237424	4
1237427	5
1237433	1
1237445	1
1238856	1
1240763	2
1241397	3
1242178	1
1246957	1
1247650	1
1247653	4
1254402	1
1254504	1
1254998	1
1258008	2
1262064	5
1262067	2
1262560	1
1262769	2
1263717	1
1264461	1
1265633	1
1266482	1
1266485	2
1266982	1
1267005	1
1267036	1
1267039	2
1267322	1
1267363	1
1268546	1
1268549	2
1268791	4
1269458	1
1269461	2
1270732	1
1270744	1
1271162	1
1271359	1
1271362	1
1271650	1
1271861	3
1271864	5
1272326	2
1272925	2
1272928	2
1273720	1
1273723	3
1273773	3
1273776	3
1274158	1
1275084	3
1275087	1
1275556	2
1275558	1
1276008	2
1277044	2
1277071	1
1279464	1
1279467	39
1279632	1
1279635	1
1279656	1
1279681	2
1281079	74
1281082	61
1281578	2
1281581	1
1286561	2
1286564	2
1286712	1
1287181	1
1292577	3
1293968	2
1293971	1
1294073	1
1294076	2
1294522	1
1298710	1
1301461	1
1301996	1
1302423	1
1302501	1
1305677	4
1305680	4
1305874	1
1305877	5
1306007	2
1306010	1
1306030	3
1306041	1
1306365	1
1306444	1
1306447	3
1306557	1
1308675	4
1308678	2
1308977	1
1310280	4
1311788	1
1312164	1
1312281	1
1312284	2
1312796	1
1313886	1
1325707	1
1332064	6
1332067	7
1332917	1
1333609	2
1333612	2
1337872	1
1338796	1
1339355	1
1340497	3
1340500	1
1340630	1
1340984	1
1342127	1
1342130	4
1342354	1
1342685	1
1342702	1
1343535	1
1343961	1
1348046	2
1349122	2
1349334	36
1349337	25
1349559	1
1349776	46
1349779	32
1350072	9
1350240	1
1350401	2
1350404	1
1350468	1
1350906	1
1350909	3
1350927	4
1351044	3
1351045	69
1351048	102
1351068	571
1351071	843
1353699	4
1353702	3
1353888	4
1353891	3
1353979	4
1353982	4
1354072	1
1354473	3
1354476	1
1354522	2
1354549	2
1354597	1
1354977	1
1357053	3
1357056	1
1358905	3
1359717	1
1359720	3
1361797	1
1365885	2
1365888	1
1368200	1
1369620	2
1371236	3
1371239	1
1371705	1
1374919	1
1374944	1
1375164	3
1376677	2
1376680	1
1376901	1
1376904	1
1377643	1
1379349	1
1380941	1
1381308	1
1383133	4
1384682	3
1384685	1
1385512	3
1385515	2
1386128	3
1387175	2
1387178	1
1387228	3
1389753	1
1393815	24
1393818	23
1394183	4
1394186	3
1394220	1
1394223	1
1397792	1
1399178	4
1399181	3
1406372	1
1409909	1
1410532	1
1411348	1
1411351	1
1412357	1
1412360	1
1414305	1
1414387	1
1414511	1
1415250	2
1415253	1
1416481	1
1417419	1
1418207	2
1418249	2
1420687	1
1421277	1
1421280	6
1425990	1
1428596	1
1428599	1
1429657	2
1429660	3
1431150	1
1431465	1
1431596	2
1431599	2
1437368	1
1437371	2
1441801	2
1442199	1
1442259	1
1443190	20
1443193	14
1443821	1
1443824	1
1444525	2
1445535	2
1453038	2
1455089	2
1455092	1
1455893	1
1459558	1
1459703	2
1465815	4
1465818	1
1468180	1
1469974	1
1470230	1
1475815	1
1475978	1
1477626	3
1480507	1
1480510	1
1480540	1
1482266	1
1482335	4
1482337	1
1482338	3
1483332	1
1483914	2
1484239	1
1484280	4
1484283	3
1484402	1
1485418	1
1486005	2
1492679	1
1497825	1
1498136	1
1498139	4
1499546	1
1499689	2
1500008	3
1500011	1
1500485	8
1500488	6
1501355	1
1502265	2
1502657	1
1503081	4
1503084	5
1503121	11
1503124	8
1503411	1
1503846	1
1504047	4
1504048	1
1504050	6
1504092	3
1504296	1
1504360	1
1504678	1
1505009	1
1505893	1
1506747	3
1506750	17
1508076	3
1508190	1
1508193	11
1509028	8
1509071	1
1509179	10
1509182	8
1510051	4
1510210	1
1512345	1
1512659	5
1512662	2
1512900	3
1519201	2
1521769	3
1524378	1
1525560	1
1527512	2
1527635	6
1528132	2
1530034	2
1530953	1
1530956	2
1531091	2
1532478	1
1534203	1
1535417	3
1535420	3
1536766	1
1536968	2
1536971	1
1537602	1
1538255	1
1538671	1
1538674	1
1538879	1
1541472	1
1542033	1
1542492	1
1542714	2
1542726	2
1542938	1
[truncated: 3,558 more rows]

## Sheet: COVERAGE DATA
					Number of transposon insertions/ ORF
Chromosome	Start	end	strand	gene_id	TnLib1	TnLib2	EMSH OXD TN1	EMSH OXD TN2			Mycobrowser ID				Product
gi|561108321|ref|NC_018143.2|	0	1524	+	RVBD_0001	0	1	0	0		YP_006513313.1	Rv0001	RVBD_0001			chromosomal replication initiator protein DnaA
gi|561108321|ref|NC_018143.2|	2051	3260	+	RVBD_0002	59	131	1	0		YP_006513314.1	Rv0002	RVBD_0002			DNA polymerase III DnaN
gi|561108321|ref|NC_018143.2|	3279	4437	+	RVBD_0003	177	338	0	0		YP_006513315.1	Rv0003	RVBD_0003			DNA replication and repair protein RecF
gi|561108321|ref|NC_018143.2|	4433	4997	+	RVBD_0004	0	0	0	0		YP_006513316.1	Rv0004	RVBD_0004			hypothetical protein
gi|561108321|ref|NC_018143.2|	5239	7267	+	RVBD_0005	1	0	0	0		YP_006513317.2	Rv0005	RVBD_0005			DNA gyrase subunit B GyrB
gi|561108321|ref|NC_018143.2|	7301	9818	+	RVBD_0006	18	9	1	0		YP_006513318.1	Rv0006	RVBD_0006			DNA gyrase subunit A GyrA
gi|561108321|ref|NC_018143.2|	9913	10828	+	RVBD_0007	42	42	0	0		YP_006513319.1	Rv0007	RVBD_0007			membrane protein
gi|561108321|ref|NC_018143.2|	11873	12311	-	RVBD_0008c	27	46	0	0		YP_006513322.1	Rv0008c	RVBD_0008c			membrane protein
gi|561108321|ref|NC_018143.2|	12467	13016	+	RVBD_0009	1126	1317	1	2		YP_006513323.1	Rv0009	RVBD_0009			iron-regulated peptidyl-prolyl cis-trans isomerase A PpiA
gi|561108321|ref|NC_018143.2|	13132	13558	-	RVBD_0010c	1378	1894	15	19		YP_006513324.1	Rv0010c	RVBD_0010c			membrane protein
gi|561108321|ref|NC_018143.2|	13713	13995	-	RVBD_0011c	0	3	0	0		YP_006513325.1	Rv0011c	RVBD_0011c			cell division protein
gi|561108321|ref|NC_018143.2|	14088	14877	+	RVBD_0012	45	172	0	0		YP_006513326.1	Rv0012	RVBD_0012			membrane protein
gi|561108321|ref|NC_018143.2|	14913	15612	+	RVBD_0013	4	9	1	1		YP_006513327.1	Rv0013	RVBD_0013			anthranilate synthase component II TrpG
gi|561108321|ref|NC_018143.2|	15589	17470	-	RVBD_0014c	0	0	0	0		YP_006513328.1	Rv0014c	RVBD_0014c			transmembrane serine/threonine-protein kinase B PknB
gi|561108321|ref|NC_018143.2|	17466	18762	-	RVBD_0015c	0	0	0	0		YP_006513329.1	Rv0015c	RVBD_0015c			transmembrane serine/threonine-protein kinase A PknA
gi|561108321|ref|NC_018143.2|	18758	20234	-	RVBD_0016c	294	458	0	1		YP_006513330.1	Rv0016c	RVBD_0016c			penicillin-binding protein PbpA
gi|561108321|ref|NC_018143.2|	20230	21640	-	RVBD_0017c	80	159	0	1		YP_006513331.1	Rv0017c	RVBD_0017c			cell division protein RodA
gi|561108321|ref|NC_018143.2|	21636	23181	-	RVBD_0018c	45	61	0	0		YP_006513332.1	Rv0018c	RVBD_0018c			phosphoserine/threonine phosphatase PstP
gi|561108321|ref|NC_018143.2|	23269	23737	-	RVBD_0019c	918	1243	2	4		YP_006513333.1	Rv0019c	RVBD_0019c			FHA domain-containing protein FhaB
gi|561108321|ref|NC_018143.2|	23860	25444	-	RVBD_0020c	1032	1251	0	0		YP_006513334.1	Rv0020c	RVBD_0020c			FHA domain-containing protein FhaA
gi|561108321|ref|NC_018143.2|	25912	26881	-	RVBD_0021c	1501	1758	7	7		YP_006513335.1	Rv0021c	RVBD_0021c			nitronate monooxygenase
gi|561108321|ref|NC_018143.2|	27022	27442	-	RVBD_0022c	251	240	0	0		YP_006513336.1	Rv0022c	RVBD_0022c			transcriptional regulator WhiB-like WhiB5
gi|561108321|ref|NC_018143.2|	27594	28365	+	RVBD_0023	0	3	0	0		YP_006513337.1	Rv0023	RVBD_0023			transcriptional regulator
gi|561108321|ref|NC_018143.2|	28361	29207	+	RVBD_0024	864	692	1	3		YP_006513338.1	Rv0024	RVBD_0024			secreted protein
gi|561108321|ref|NC_018143.2|	29244	29607	+	RVBD_0025	87	109	0	0		YP_006513339.1	Rv0025	RVBD_0025			hypothetical protein
gi|561108321|ref|NC_018143.2|	29721	31068	+	RVBD_0026	364	366	5	4		YP_006513340.1	Rv0026	RVBD_0026			hypothetical protein
gi|561108321|ref|NC_018143.2|	31188	31506	+	RVBD_0027	37	59	0	1		YP_006513341.1	Rv0027	RVBD_0027			hypothetical protein
gi|561108321|ref|NC_018143.2|	31513	31819	+	RVBD_0028	48	27	1	0		YP_006513342.1	Rv0028	RVBD_0028			hypothetical protein
gi|561108321|ref|NC_018143.2|	32056	33154	+	RVBD_0029	228	360	8	6		YP_006513343.1	Rv0029	RVBD_0029			hypothetical protein
gi|561108321|ref|NC_018143.2|	33223	33553	+	RVBD_0030	216	295	0	2		YP_006513344.1	Rv0030	RVBD_0030			hypothetical protein
gi|561108321|ref|NC_018143.2|	33581	33794	+	RVBD_0031	12	27	0	0		YP_006513345.1	Rv0031	RVBD_0031			transposase
gi|561108321|ref|NC_018143.2|	34294	36610	+	RVBD_0032	2962	4320	18	10		YP_006513346.1	Rv0032	RVBD_0032			8-amino-7-oxononanoate synthase BioF2
gi|561108321|ref|NC_018143.2|	36606	36870	+	RVBD_0033	6	14	0	0		YP_006513347.1	Rv0033	RVBD_0033			acyl carrier protein AcpA
gi|561108321|ref|NC_018143.2|	36866	37262	+	RVBD_0034	700	930	0	0		YP_006513348.1	Rv0034	RVBD_0034			hypothetical protein
gi|561108321|ref|NC_018143.2|	37258	38947	+	RVBD_0035	559	790	11	7		YP_006513349.1	Rv0035	RVBD_0035			fatty-acid-CoA ligase FadD34
gi|561108321|ref|NC_018143.2|	39055	39829	-	RVBD_0036c	105	156	0	0		YP_006513350.1	Rv0036c	RVBD_0036c			hypothetical protein
gi|561108321|ref|NC_018143.2|	39876	41202	-	RVBD_0037c	908	962	19	12		YP_006513351.1	Rv0037c	RVBD_0037c			integral membrane protein
gi|561108321|ref|NC_018143.2|	41303	41912	+	RVBD_0038	247	377	1	0		YP_006513352.1	Rv0038	RVBD_0038			transcriptional regulator
gi|561108321|ref|NC_018143.2|	42003	42351	-	RVBD_0039c	44	69	2	0		YP_006513353.1	Rv0039c	RVBD_0039c			transmembrane protein
gi|561108321|ref|NC_018143.2|	42432	43365	-	RVBD_0040c	1245	1201	0	0		YP_006513354.1	Rv0040c	RVBD_0040c			secreted proline rich protein Mtc28
gi|561108321|ref|NC_018143.2|	43561	46471	+	RVBD_0041	90	162	4	8		YP_006513355.1	Rv0041	RVBD_0041			leucyl-tRNA synthetase LeuS
gi|561108321|ref|NC_018143.2|	46580	47207	-	RVBD_0042c	40	62	0	0		YP_006513356.1	Rv0042c	RVBD_0042c			transcriptional regulator MarR-family
gi|561108321|ref|NC_018143.2|	47365	48100	-	RVBD_0043c	259	363	6	6		YP_006513357.1	Rv0043c	RVBD_0043c			transcriptional regulator GntR-family
gi|561108321|ref|NC_018143.2|	48232	49027	-	RVBD_0044c	904	1187	2	8		YP_006513358.1	Rv0044c	RVBD_0044c			oxidoreductase
gi|561108321|ref|NC_018143.2|	49042	49939	-	RVBD_0045c	64	93	0	1		YP_006513359.1	Rv0045c	RVBD_0045c			hydrolase
gi|561108321|ref|NC_018143.2|	50020	51124	-	RVBD_0046c	2	6	3	0		YP_006513360.1	Rv0046c	RVBD_0046c			myo-inositol-1-phosphate synthase Ino1
gi|561108321|ref|NC_018143.2|	51184	51727	-	RVBD_0047c	49	83	6	7		YP_006513361.1	Rv0047c	RVBD_0047c			hypothetical protein
gi|561108321|ref|NC_018143.2|	51827	52697	-	RVBD_0048c	612	836	10	6		YP_006513362.1	Rv0048c	RVBD_0048c			membrane protein
gi|561108321|ref|NC_018143.2|	52830	53244	+	RVBD_0049	316	358	0	4		YP_006513363.1	Rv0049	RVBD_0049			hypothetical protein
gi|561108321|ref|NC_018143.2|	53662	55696	+	RVBD_0050	40	62	2	0		YP_006513364.1	Rv0050	RVBD_0050			bifunctional penicillin-binding protein 1A/1B PonA1
gi|561108321|ref|NC_018143.2|	55692	57375	+	RVBD_0051	431	732	4	8		YP_006513365.1	Rv0051	RVBD_0051			transmembrane protein
gi|561108321|ref|NC_018143.2|	57406	57970	+	RVBD_0052	56	78	0	0		YP_006513366.2	Rv0052	RVBD_0052			hypothetical protein
gi|561108321|ref|NC_018143.2|	58188	58479	+	RVBD_0053	1	6	0	0		YP_006513367.1	Rv0053	RVBD_0053			30S ribosomal protein S6 RpsF
gi|561108321|ref|NC_018143.2|	58582	59077	+	RVBD_0054	0	0	0	0		YP_006513368.1	Rv0054	RVBD_0054			single-strand DNA-binding protein Ssb
gi|561108321|ref|NC_018143.2|	59118	59373	+	RVBD_0055	10	13	0	0		YP_006513369.1	Rv0055	RVBD_0055			30S ribosomal protein S18 RpsR1
gi|561108321|ref|NC_018143.2|	59405	59864	+	RVBD_0056	0	2	0	0		YP_006513370.1	Rv0056	RVBD_0056			50S ribosomal protein L9 RplI
gi|561108321|ref|NC_018143.2|	59892	60414	+	RVBD_0057	54	102	0	1		YP_006513371.1	Rv0057	RVBD_0057			hypothetical protein
gi|561108321|ref|NC_018143.2|	60392	63017	+	RVBD_0058	0	0	0	0		YP_006513372.1	Rv0058	RVBD_0058			replicative DNA helicase DnaB
gi|561108321|ref|NC_018143.2|	63196	63889	+	RVBD_0059	1855	2568	6	2		YP_006513373.1	Rv0059	RVBD_0059			hypothetical protein
gi|561108321|ref|NC_018143.2|	63905	64964	+	RVBD_0060	508	671	3	1		YP_006513374.1	Rv0060	RVBD_0060			hypothetical protein
gi|561108321|ref|NC_018143.2|	65008	65347	-	RVBD_0061c	43	63	0	0		YP_006513375.1	Rv0061c	RVBD_0061c			hypothetical protein
gi|561108321|ref|NC_018143.2|	65548	66691	+	RVBD_0062	187	179	6	1		YP_006513376.1	Rv0062	RVBD_0062			cellulase CelA1
gi|561108321|ref|NC_018143.2|	66919	68359	+	RVBD_0063	3938	3105	23	23		YP_006513377.1	Rv0063	RVBD_0063			oxidoreductase
gi|561108321|ref|NC_018143.2|	68616	71556	+	RVBD_0064	704	780	3	7		YP_006513378.1	Rv0064	RVBD_0064			transmembrane protein
gi|561108321|ref|NC_018143.2|	71585	71825	+	RVBD_0064A	713	677	0	0		YP_006513379.1	Rv0064A	RVBD_0064A			antitoxin VapB1
gi|561108321|ref|NC_018143.2|	71817	72219	+	RVBD_0065	20	31	0	0		YP_006513380.1	Rv0065	RVBD_0065			toxin VapC1
gi|561108321|ref|NC_018143.2|	72270	74508	-	RVBD_0066c	109	112	0	0		YP_006513381.1	Rv0066c	RVBD_0066c			isocitrate dehydrogenase Icd2
gi|561108321|ref|NC_018143.2|	74625	75195	-	RVBD_0067c	22	84	0	0		YP_006513382.1	Rv0067c	RVBD_0067c			transcriptional regulator TetR-family
gi|561108321|ref|NC_018143.2|	75297	76209	+	RVBD_0068	689	1060	5	4		YP_006513383.1	Rv0068	RVBD_0068			oxidoreductase
gi|561108321|ref|NC_018143.2|	76233	77619	-	RVBD_0069c	65	93	0	0		YP_006513384.1	Rv0069c	RVBD_0069c			l-serine dehydratase SdaA
gi|561108321|ref|NC_018143.2|	77615	78893	-	RVBD_0070c	187	265	2	1		YP_006513385.1	Rv0070c	RVBD_0070c			serine hydroxymethyltransferase GlyA2
gi|561108321|ref|NC_018143.2|	79482	80190	+	RVBD_0071	126	218	5	5		YP_006513386.1	Rv0071	RVBD_0071			RNA-directed DNA polymerase
gi|561108321|ref|NC_018143.2|	80620	81670	+	RVBD_0072	918	1325	5	3		YP_006513387.1	Rv0072	RVBD_0072			glutamine-transport ABC transporter transmembrane protein
gi|561108321|ref|NC_018143.2|	81672	82665	+	RVBD_0073	1556	2182	7	7		YP_006513388.1	Rv0073	RVBD_0073			glutamine-transport ABC transporter ATP-binding protein
gi|561108321|ref|NC_018143.2|	82744	83980	+	RVBD_0074	1004	1307	1	1		YP_006513389.1	Rv0074	RVBD_0074			hypothetical protein
gi|561108321|ref|NC_018143.2|	83992	85165	+	RVBD_0075	356	585	4	6		YP_006513390.1	Rv0075	RVBD_0075			cystathionine beta-lyase
gi|561108321|ref|NC_018143.2|	85179	85569	-	RVBD_0076c	50	61	0	0		YP_006513391.1	Rv0076c	RVBD_0076c			membrane protein
gi|561108321|ref|NC_018143.2|	85632	86463	-	RVBD_0077c	123	193	1	0		YP_006513392.1	Rv0077c	RVBD_0077c			oxidoreductase
gi|561108321|ref|NC_018143.2|	86524	87130	+	RVBD_0078	14	10	0	1		YP_006513393.1	Rv0078	RVBD_0078			transcriptional regulator
gi|561108321|ref|NC_018143.2|	87204	87798	-	RVBD_0078A	66	61	0	1		YP_006513394.1	Rv0078A	RVBD_0078A			hypothetical protein
gi|561108321|ref|NC_018143.2|	87794	88001	-	RVBD_0078B	12	1	0	0		YP_006513395.1	Rv0078B	RVBD_0078B			hypothetical protein
gi|561108321|ref|NC_018143.2|	88200	89022	+	RVBD_0079	256	300	5	4		YP_006513396.1	Rv0079	RVBD_0079			hypothetical protein
gi|561108321|ref|NC_018143.2|	89018	89477	+	RVBD_0080	26	41	1	1		YP_006513397.1	Rv0080	RVBD_0080			hypothetical protein
gi|561108321|ref|NC_018143.2|	89571	89916	+	RVBD_0081	218	180	3	3		YP_006513398.1	Rv0081	RVBD_0081			ArsR family transcriptional regulator
gi|561108321|ref|NC_018143.2|	89920	90400	+	RVBD_0082	169	110	1	6		YP_006513399.1	Rv0082	RVBD_0082			oxidoreductase
gi|561108321|ref|NC_018143.2|	90396	92319	+	RVBD_0083	132	117	0	1		YP_006513400.1	Rv0083	RVBD_0083			oxidoreductase
gi|561108321|ref|NC_018143.2|	92324	93275	+	RVBD_0084	60	37	0	0		YP_006513401.1	Rv0084	RVBD_0084			formate hydrogenlyase HycD
gi|561108321|ref|NC_018143.2|	93285	93948	+	RVBD_0085	1	0	0	0		YP_006513402.1	Rv0085	RVBD_0085			hydrogenase HycP
gi|561108321|ref|NC_018143.2|	93947	95414	+	RVBD_0086	164	207	1	1		YP_006513403.1	Rv0086	RVBD_0086			hydrogenase HycQ
gi|561108321|ref|NC_018143.2|	95410	96889	+	RVBD_0087	82	121	3	1		YP_006513404.1	Rv0087	RVBD_0087			formate hydrogenase HycE
gi|561108321|ref|NC_018143.2|	96923	97598	+	RVBD_0088	63	92	0	0		YP_006513405.1	Rv0088	RVBD_0088			polyketide cyclase/dehydrase
gi|561108321|ref|NC_018143.2|	97754	98348	+	RVBD_0089	181	166	10	5		YP_006513406.1	Rv0089	RVBD_0089			methyltransferase
gi|561108321|ref|NC_018143.2|	98476	99247	+	RVBD_0090	51	51	13	11		YP_006513407.1	Rv0090	RVBD_0090			membrane protein
gi|561108321|ref|NC_018143.2|	99680	100448	+	RVBD_0091	192	173	0	3		YP_006513409.1	Rv0091	RVBD_0091			bifunctional MTA/SAH nucleosidase Mtn
gi|561108321|ref|NC_018143.2|	100579	102865	+	RVBD_0092	344	448	2	3		YP_006513410.1	Rv0092	RVBD_0092			cation transporter P-type ATPase CtpA
gi|561108321|ref|NC_018143.2|	102811	103660	-	RVBD_0093c	61	186	1	3		YP_006513411.1	Rv0093c	RVBD_0093c			membrane protein
gi|561108321|ref|NC_018143.2|	103706	104660	-	RVBD_0094c	1050	1028	22	21		YP_006513412.1	Rv0094c	RVBD_0094c			hypothetical protein
gi|561108321|ref|NC_018143.2|	104801	105212	-	RVBD_0095c	24	57	0	0		YP_006513413.1	Rv0095c	RVBD_0095c			hypothetical protein
gi|561108321|ref|NC_018143.2|	105320	106712	+	RVBD_0096	85	106	68	80		YP_006513414.1	Rv0096	RVBD_0096			PPE family protein PPE1
gi|561108321|ref|NC_018143.2|	106730	107600	+	RVBD_0097	819	1100	100	98		YP_006513415.1	Rv0097	RVBD_0097			oxidoreductase
gi|561108321|ref|NC_018143.2|	107596	108148	+	RVBD_0098	42	35	0	0		YP_006513416.1	Rv0098	RVBD_0098			fatty-acyl-CoA thioesterase type III FcoT
gi|561108321|ref|NC_018143.2|	108152	109775	+	RVBD_0099	32	84	0	0		YP_006513417.1	Rv0099	RVBD_0099			fatty-acid-CoA ligase FadD10
gi|561108321|ref|NC_018143.2|	109779	110016	+	RVBD_0100	0	4	0	0		YP_006513418.1	Rv0100	RVBD_0100			hypothetical protein
gi|561108321|ref|NC_018143.2|	109997	117536	+	RVBD_0101	1474	2232	15	9		YP_006513419.1	Rv0101	RVBD_0101			peptide synthetase Nrp
gi|561108321|ref|NC_018143.2|	117710	119696	+	RVBD_0102	2	10	0	0		YP_006513420.1	Rv0102	RVBD_0102			membrane protein
gi|561108321|ref|NC_018143.2|	119911	122170	-	RVBD_0103c	2752	3270	9	4		YP_006513421.1	Rv0103c	RVBD_0103c			cation-transporter P-type ATPase CtpB
gi|561108321|ref|NC_018143.2|	122313	123828	+	RVBD_0104	925	1275	10	10		YP_006513422.1	Rv0104	RVBD_0104			hypothetical protein
gi|561108321|ref|NC_018143.2|	123976	124261	-	RVBD_0105c	585	779	0	0		YP_006513423.1	Rv0105c	RVBD_0105c			50S ribosomal protein L28 RpmB1
gi|561108321|ref|NC_018143.2|	124370	125567	+	RVBD_0106	136	151	0	0		YP_006513424.1	Rv0106	RVBD_0106			hypothetical protein
gi|561108321|ref|NC_018143.2|	125639	130538	-	RVBD_0107c	2089	1803	3	3		YP_006513425.1	Rv0107c	RVBD_0107c			cation-transporter P-type ATPase CtpI
gi|561108321|ref|NC_018143.2|	130891	131101	-	RVBD_0108c	298	324	1	0		YP_006513426.1	Rv0108c	RVBD_0108c			hypothetical protein
gi|561108321|ref|NC_018143.2|	131379	132870	+	RVBD_0109	297	275	0	1		YP_006513427.1	Rv0109	RVBD_0109			PE-PGRS family protein PE_PGRS1
gi|561108321|ref|NC_018143.2|	133017	133767	+	RVBD_0110	1371	1418	2	1		YP_006513428.1	Rv0110	RVBD_0110			integral membrane protein
gi|561108321|ref|NC_018143.2|	133947	136005	+	RVBD_0111	2235	2064	0	3		YP_006513429.1	Rv0111	RVBD_0111			transmembrane acyltransferase
gi|561108321|ref|NC_018143.2|	136286	137243	+	RVBD_0112	670	933	0	0		YP_006513430.1	Rv0112	RVBD_0112			GDP-mannose 4
gi|561108321|ref|NC_018143.2|	137316	137907	+	RVBD_0113	0	1	0	0		YP_006513431.1	Rv0113	RVBD_0113			sedoheptulose-7-phosphate isomerase GmhA
gi|561108321|ref|NC_018143.2|	137938	138511	+	RVBD_0114	397	580	1	0		YP_006513432.1	Rv0114	RVBD_0114			d-alpha
gi|561108321|ref|NC_018143.2|	138510	139671	+	RVBD_0115	857	1125	4	5		YP_006513433.1	Rv0115	RVBD_0115			d-alpha-d-heptose-7-phosphate kinase HddA
gi|561108321|ref|NC_018143.2|	140264	141020	-	RVBD_0116c	143	224	3	1		YP_006513435.1	Rv0116c	RVBD_0116c			l
gi|561108321|ref|NC_018143.2|	141197	142142	+	RVBD_0117	19	26	4	3		YP_006513436.1	Rv0117	RVBD_0117			oxidative stress response regulatory protein OxyS
gi|561108321|ref|NC_018143.2|	142125	143874	-	RVBD_0118c	1801	1725	11	16		YP_006513437.1	Rv0118c	RVBD_0118c			oxalyl-CoA decarboxylase OxcA
gi|561108321|ref|NC_018143.2|	144046	145624	+	RVBD_0119	0	1	0	0		YP_006513438.1	Rv0119	RVBD_0119			fatty-acid-CoA ligase FadD7
gi|561108321|ref|NC_018143.2|	145624	147769	-	RVBD_0120c	140	114	2	0		YP_006513439.1	Rv0120c	RVBD_0120c			elongation factor G FusA2
gi|561108321|ref|NC_018143.2|	147905	148340	-	RVBD_0121c	395	430	0	0		YP_006513440.1	Rv0121c	RVBD_0121c			hypothetical protein
gi|561108321|ref|NC_018143.2|	148488	148857	+	RVBD_0122	42	68	2	8		YP_006513441.1	Rv0122	RVBD_0122			hypothetical protein
gi|561108321|ref|NC_018143.2|	148853	149222	+	RVBD_0123	50	20	0	2		YP_006513442.1	Rv0123	RVBD_0123			hypothetical protein
gi|561108321|ref|NC_018143.2|	149530	150994	+	RVBD_0124	107	125	0	0		YP_006513443.1	Rv0124	RVBD_0124			PE-PGRS family protein PE_PGRS2
gi|561108321|ref|NC_018143.2|	151145	152213	+	RVBD_0125	917	785	1	0		YP_006513444.1	Rv0125	RVBD_0125			serine protease PepA
gi|561108321|ref|NC_018143.2|	152321	154127	+	RVBD_0126	3	46	0	0		YP_006513445.1	Rv0126	RVBD_0126			trehalose synthase TreS
gi|561108321|ref|NC_018143.2|	154229	155597	+	RVBD_0127	67	45	0	0		YP_006513446.1	Rv0127	RVBD_0127			maltokinase Mak
gi|561108321|ref|NC_018143.2|	155664	156444	+	RVBD_0128	287	333	5	10		YP_006513447.1	Rv0128	RVBD_0128			transmembrane protein
gi|561108321|ref|NC_018143.2|	156575	157598	-	RVBD_0129c	561	1912	0	0		YP_006513448.1	Rv0129c	RVBD_0129c			6-O-acylglucoside esterase/glucoside 6-O-acyltransferase FbpC
gi|561108321|ref|NC_018143.2|	157844	158300	+	RVBD_0130	9	23	0	0		YP_006513449.1	Rv0130	RVBD_0130			3-hydroxyl-thioester dehydratase
gi|561108321|ref|NC_018143.2|	158312	159656	-	RVBD_0131c	71	157	0	0		YP_006513450.1	Rv0131c	RVBD_0131c			acyl-CoA dehydrogenase FadE1
gi|561108321|ref|NC_018143.2|	159697	160780	-	RVBD_0132c	227	265	2	0		YP_006513451.1	Rv0132c	RVBD_0132c			F420-dependent glucose-6-phosphate dehydrogenase Fgd2
gi|561108321|ref|NC_018143.2|	160866	161472	+	RVBD_0133	234	203	0	0		YP_006513452.1	Rv0133	RVBD_0133			N-acetyltransferase
gi|561108321|ref|NC_018143.2|	161768	162671	+	RVBD_0134	256	319	3	10		YP_006513453.1	Rv0134	RVBD_0134			epoxide hydrolase EphF
gi|561108321|ref|NC_018143.2|	162641	163247	-	RVBD_0135c	225	329	1	2		YP_006513454.1	Rv0135c	RVBD_0135c			transcriptional regulator
gi|561108321|ref|NC_018143.2|	163363	164689	+	RVBD_0136	1109	1235	0	2		YP_006513455.1	Rv0136	RVBD_0136			cytochrome P450 138 Cyp138
gi|561108321|ref|NC_018143.2|	164709	165258	-	RVBD_0137c	98	90	3	1		YP_006513456.1	Rv0137c	RVBD_0137c			peptide methionine sulfoxide reductase MsrA
gi|561108321|ref|NC_018143.2|	165320	165824	+	RVBD_0138	1313	1528	1	1		YP_006513457.1	Rv0138	RVBD_0138			hypothetical protein
gi|561108321|ref|NC_018143.2|	165824	166847	+	RVBD_0139	346	448	1	0		YP_006513458.1	Rv0139	RVBD_0139			oxidoreductase
gi|561108321|ref|NC_018143.2|	166907	167288	+	RVBD_0140	62	72	0	1		YP_006513459.1	Rv0140	RVBD_0140			hypothetical protein
gi|561108321|ref|NC_018143.2|	167268	167679	-	RVBD_0141c	26	34	0	2		YP_006513460.1	Rv0141c	RVBD_0141c			hypothetical protein
gi|561108321|ref|NC_018143.2|	167708	168635	+	RVBD_0142	23	15	0	0		YP_006513461.1	Rv0142	RVBD_0142			hypothetical protein
gi|561108321|ref|NC_018143.2|	168701	170180	-	RVBD_0143c	245	319	0	2		YP_006513462.1	Rv0143c	RVBD_0143c			CIC family chloride channel protein
gi|561108321|ref|NC_018143.2|	170281	171124	+	RVBD_0144	828	974	1	0		YP_006513463.1	Rv0144	RVBD_0144			transcriptional regulator TetR-family
gi|561108321|ref|NC_018143.2|	171212	172166	+	RVBD_0145	1856	2394	10	12		YP_006513464.1	Rv0145	RVBD_0145			s-adenosylmethionine-dependent methyltransferase
gi|561108321|ref|NC_018143.2|	172208	173141	+	RVBD_0146	973	1321	6	10		YP_006513465.1	Rv0146	RVBD_0146			s-adenosylmethionine-dependent methyltransferase
gi|561108321|ref|NC_018143.2|	173235	174756	+	RVBD_0147	1039	1314	6	6		YP_006513466.1	Rv0147	RVBD_0147			aldehyde dehydrogenase (NAD+)
gi|561108321|ref|NC_018143.2|	174830	175691	+	RVBD_0148	703	990	5	6		YP_006513467.1	Rv0148	RVBD_0148			oxidoreductase
gi|561108321|ref|NC_018143.2|	175697	176666	+	RVBD_0149	215	310	2	2		YP_006513468.1	Rv0149	RVBD_0149			NADPH2:quinone reductase
gi|561108321|ref|NC_018143.2|	176662	176950	-	RVBD_0150c	0	0	0	0		YP_006513469.1	Rv0150c	RVBD_0150c			hypothetical protein
gi|561108321|ref|NC_018143.2|	177540	179307	-	RVBD_0151c	1185	1654	8	14		YP_006513470.1	Rv0151c	RVBD_0151c			PE family protein PE1
gi|561108321|ref|NC_018143.2|	179316	180894	-	RVBD_0152c	3176	3842	8	2		YP_006513471.1	Rv0152c	RVBD_0152c			PE family protein PE2
gi|561108321|ref|NC_018143.2|	181152	181983	-	RVBD_0153c	94	107	0	0		YP_006513472.1	Rv0153c	RVBD_0153c			phosphotyrosine protein phosphatase PtpB
gi|561108321|ref|NC_018143.2|	181984	183196	-	RVBD_0154c	129	201	5	2		YP_006513473.1	Rv0154c	RVBD_0154c			acyl-CoA dehydrogenase FadE2
gi|561108321|ref|NC_018143.2|	183619	184720	+	RVBD_0155	305	307	40	31		YP_006513474.1	Rv0155	RVBD_0155			NAD(P) transhydrogenase subunit alpha PntAa
gi|561108321|ref|NC_018143.2|	184720	185053	+	RVBD_0156	77	110	4	5		YP_006513475.1	Rv0156	RVBD_0156			NAD(P) transhydrogenase subunit alpha PntAb
gi|561108321|ref|NC_018143.2|	185049	186477	+	RVBD_0157	1261	1650	42	58		YP_006513476.1	Rv0157	RVBD_0157			NAD(P) transhydrogenase subunit beta PntB
gi|561108321|ref|NC_018143.2|	186492	186621	-	RVBD_0157A	455	692	0	0		YP_006513477.1	Rv0157A	RVBD_0157A			hypothetical protein
gi|561108321|ref|NC_018143.2|	186782	187427	+	RVBD_0158	446	987	14	13		YP_006513478.1	Rv0158	RVBD_0158			transcriptional regulator TetR-family
gi|561108321|ref|NC_018143.2|	187430	188837	-	RVBD_0159c	4449	6248	18	23		YP_006513479.1	Rv0159c	RVBD_0159c			PE family protein PE3
gi|561108321|ref|NC_018143.2|	188928	190437	-	RVBD_0160c	3602	4335	26	23		YP_006513480.1	Rv0160c	RVBD_0160c			PE family protein PE4
gi|561108321|ref|NC_018143.2|	190604	191954	+	RVBD_0161	240	221	7	5		YP_006513481.1	Rv0161	RVBD_0161			oxidoreductase
gi|561108321|ref|NC_018143.2|	191981	193133	-	RVBD_0162c	366	446	2	2		YP_006513482.1	Rv0162c	RVBD_0162c			zinc-type alcohol dehydrogenase AdhE1
gi|561108321|ref|NC_018143.2|	193114	193570	+	RVBD_0163	360	560	0	2		YP_006513483.1	Rv0163	RVBD_0163			acyl-CoA thioester hydrolase
gi|561108321|ref|NC_018143.2|	193623	194109	+	RVBD_0164	40	54	2	0		YP_006513484.1	Rv0164	RVBD_0164			hypothetical protein
gi|561108321|ref|NC_018143.2|	194141	194813	-	RVBD_0165c	122	201	0	0		YP_006513485.2	Rv0165c	RVBD_0165c			transcriptional regulator Mce1R
gi|561108321|ref|NC_018143.2|	194990	196655	+	RVBD_0166	983	1384	21	23		YP_006513486.1	Rv0166	RVBD_0166			fatty-acid-CoA ligase FadD5
gi|561108321|ref|NC_018143.2|	196858	197656	+	RVBD_0167	982	1170	23	32		YP_006513487.1	Rv0167	RVBD_0167			ABC transporter permease YrbE1A
gi|561108321|ref|NC_018143.2|	197657	198527	+	RVBD_0168	398	616	10	13		YP_006513488.1	Rv0168	RVBD_0168			ABC transporter permease YrbE1B
gi|561108321|ref|NC_018143.2|	198531	199896	+	RVBD_0169	4610	6844	70	110		YP_006513489.1	Rv0169	RVBD_0169			MCE-family protein Mce1A
gi|561108321|ref|NC_018143.2|	199892	200933	+	RVBD_0170	3804	5344	69	44		YP_006513490.1	Rv0170	RVBD_0170			MCE-family protein Mce1B
gi|561108321|ref|NC_018143.2|	200929	202477	+	RVBD_0171	3577	3918	98	89		YP_006513491.1	Rv0171	RVBD_0171			MCE-family protein Mce1C
gi|561108321|ref|NC_018143.2|	202473	204066	+	RVBD_0172	10601	12111	298	309		YP_006513492.1	Rv0172	RVBD_0172			MCE-family protein Mce1D
gi|561108321|ref|NC_018143.2|	204062	205235	+	RVBD_0173	1184	1706	52	45		YP_006513493.1	Rv0173	RVBD_0173			MCE-family lipoprotein LprK
gi|561108321|ref|NC_018143.2|	205228	206776	+	RVBD_0174	1904	2875	69	96		YP_006513494.1	Rv0174	RVBD_0174			MCE-family protein Mce1F
gi|561108321|ref|NC_018143.2|	206811	207453	+	RVBD_0175	453	612	2	0		YP_006513495.1	Rv0175	RVBD_0175			MCE-associated membrane protein
gi|561108321|ref|NC_018143.2|	207449	208418	+	RVBD_0176	406	530	21	40		YP_006513496.1	Rv0176	RVBD_0176			MCE-associated membrane protein
gi|561108321|ref|NC_018143.2|	208414	208969	+	RVBD_0177	221	253	4	3		YP_006513497.1	Rv0177	RVBD_0177			MCE-associated membrane protein
gi|561108321|ref|NC_018143.2|	208935	209670	+	RVBD_0178	178	211	21	26		YP_006513498.1	Rv0178	RVBD_0178			MCE-associated membrane protein
gi|561108321|ref|NC_018143.2|	209700	210810	-	RVBD_0179c	2259	2996	6	8		YP_006513499.1	Rv0179c	RVBD_0179c			lipoprotein LprO
gi|561108321|ref|NC_018143.2|	210889	212248	-	RVBD_0180c	21	59	5	5		YP_006513500.1	Rv0180c	RVBD_0180c			YhgE/Pip domain-containing protein
gi|561108321|ref|NC_018143.2|	212274	213009	-	RVBD_0181c	814	942	12	12		YP_006513501.1	Rv0181c	RVBD_0181c			hypothetical protein
gi|561108321|ref|NC_018143.2|	213025	214138	-	RVBD_0182c	549	621	3	4		YP_006513502.1	Rv0182c	RVBD_0182c			alternative RNA polymerase sigma factor SigG
gi|561108321|ref|NC_018143.2|	214085	214925	+	RVBD_0183	2136	2012	14	18		YP_006513503.1	Rv0183	RVBD_0183			lysophospholipase
gi|561108321|ref|NC_018143.2|	214966	215716	+	RVBD_0184	73	81	0	0		YP_006513504.1	Rv0184	RVBD_0184			hypothetical protein
gi|561108321|ref|NC_018143.2|	215712	216222	+	RVBD_0185	27	33	1	0		YP_006513505.1	Rv0185	RVBD_0185			hypothetical protein
gi|561108321|ref|NC_018143.2|	216266	218342	+	RVBD_0186	319	284	3	3		YP_006513506.1	Rv0186	RVBD_0186			beta-glucosidase BglS
gi|561108321|ref|NC_018143.2|	218387	218549	-	RVBD_0186Ac	132	167	8	12		YP_008855181.1	Rv0186Ac	RVBD_0186Ac			metallothionein MymT
gi|561108321|ref|NC_018143.2|	218702	219365	+	RVBD_0187	734	663	3	0		YP_006513507.1	Rv0187	RVBD_0187			O-methyltransferase
gi|561108321|ref|NC_018143.2|	219483	219915	+	RVBD_0188	63	66	2	1		YP_006513508.1	Rv0188	RVBD_0188			transmembrane protein
gi|561108321|ref|NC_018143.2|	219993	221721	-	RVBD_0189c	9	11	0	1		YP_006513509.1	Rv0189c	RVBD_0189c			dihydroxy-acid dehydratase IlvD
gi|561108321|ref|NC_018143.2|	221868	222159	+	RVBD_0190	38	37	0	0		YP_006513510.1	Rv0190	RVBD_0190			hypothetical protein
gi|561108321|ref|NC_018143.2|	222286	223528	+	RVBD_0191	2405	2014	12	9		YP_006513511.1	Rv0191	RVBD_0191			integral membrane protein
gi|561108321|ref|NC_018143.2|	223561	224662	+	RVBD_0192	1789	1735	4	4		YP_006513512.1	Rv0192	RVBD_0192			hypothetical protein
gi|561108321|ref|NC_018143.2|	223604	223907	+	RVBD_0192A	126	83	0	0		YP_006513513.1	Rv0192A	RVBD_0192A			secreted protein
gi|561108321|ref|NC_018143.2|	224721	226569	-	RVBD_0193c	1038	1210	9	10		YP_006513514.1	Rv0193c	RVBD_0193c			hypothetical protein
gi|561108321|ref|NC_018143.2|	226875	230460	+	RVBD_0194	3430	4008	17	18		YP_006513516.1	Rv0194	RVBD_0194			transmembrane multidrug efflux pump
gi|561108321|ref|NC_018143.2|	230896	231532	+	RVBD_0195	134	180	8	10		YP_006513517.1	Rv0195	RVBD_0195			two-component system transcriptional regulator
gi|561108321|ref|NC_018143.2|	231644	232229	+	RVBD_0196	94	163	1	0		YP_006513518.1	Rv0196	RVBD_0196			transcriptional regulator
gi|561108321|ref|NC_018143.2|	232228	234475	+	RVBD_0197	943	1451	12	18		YP_006513519.1	Rv0197	RVBD_0197			oxidoreductase
gi|561108321|ref|NC_018143.2|	234515	236507	-	RVBD_0198c	695	980	2	3		YP_006513520.1	Rv0198c	RVBD_0198c			zinc metalloprotease Zmp1
gi|561108321|ref|NC_018143.2|	236549	237209	+	RVBD_0199	282	510	0	0		YP_006513521.1	Rv0199	RVBD_0199			membrane protein
gi|561108321|ref|NC_018143.2|	237205	237895	+	RVBD_0200	55	62	0	0		YP_006513522.1	Rv0200	RVBD_0200			transmembrane protein
gi|561108321|ref|NC_018143.2|	237891	238395	-	RVBD_0201c	443	645	0	0		YP_006513523.1	Rv0201c	RVBD_0201c			hypothetical protein
gi|561108321|ref|NC_018143.2|	238391	241292	-	RVBD_0202c	1856	2721	5	4		YP_006513524.1	Rv0202c	RVBD_0202c			transmembrane transporter MmpL11
gi|561108321|ref|NC_018143.2|	241513	241924	+	RVBD_0203	43	34	0	0		YP_006513525.1	Rv0203	RVBD_0203			exported protein
gi|561108321|ref|NC_018143.2|	241975	243214	-	RVBD_0204c	279	926	0	4		YP_006513526.1	Rv0204c	RVBD_0204c			transmembrane protein
gi|561108321|ref|NC_018143.2|	243383	244487	+	RVBD_0205	1080	952	2	4		YP_006513527.1	Rv0205	RVBD_0205			membrane protein
gi|561108321|ref|NC_018143.2|	244483	247318	-	RVBD_0206c	35	58	0	0		YP_006513528.1	Rv0206c	RVBD_0206c			transmembrane transporter MmpL3
gi|561108321|ref|NC_018143.2|	247383	248112	-	RVBD_0207c	29	38	0	0		YP_006513529.1	Rv0207c	RVBD_0207c			hypothetical protein
gi|561108321|ref|NC_018143.2|	248114	248906	-	RVBD_0208c	38	56	0	0		YP_006513530.1	Rv0208c	RVBD_0208c			methyltransferase
gi|561108321|ref|NC_018143.2|	249037	250123	+	RVBD_0209	86	70	2	1		YP_006513531.1	Rv0209	RVBD_0209			hypothetical protein
gi|561108321|ref|NC_018143.2|	250119	251598	+	RVBD_0210	211	189	6	7		YP_006513532.1	Rv0210	RVBD_0210			hypothetical protein
gi|561108321|ref|NC_018143.2|	251781	253602	+	RVBD_0211	1270	1266	4	2		YP_006513533.1	Rv0211	RVBD_0211			iron-regulated phosphoenolpyruvate carboxykinase PckA
gi|561108321|ref|NC_018143.2|	253668	254640	-	RVBD_0212c	281	461	0	0		YP_006513534.1	Rv0212c	RVBD_0212c			transcriptional regulator AsnC-family
gi|561108321|ref|NC_018143.2|	254636	255950	-	RVBD_0213c	1583	2295	6	2		YP_006513535.1	Rv0213c	RVBD_0213c			methyltransferase
gi|561108321|ref|NC_018143.2|	256063	257677	+	RVBD_0214	847	1418	6	4		YP_006513536.1	Rv0214	RVBD_0214			fatty-acid-CoA ligase FadD4
gi|561108321|ref|NC_018143.2|	257782	258856	-	RVBD_0215c	143	182	1	2		YP_006513537.1	Rv0215c	RVBD_0215c			acyl-CoA dehydrogenase FadE3
gi|561108321|ref|NC_018143.2|	258912	259926	+	RVBD_0216	187	181	3	3		YP_006513538.1	Rv0216	RVBD_0216			double hotdog hydratase
gi|561108321|ref|NC_018143.2|	259922	260831	-	RVBD_0217c	526	506	2	3		YP_006513539.1	Rv0217c	RVBD_0217c			esterase LipW
gi|561108321|ref|NC_018143.2|	260923	262252	+	RVBD_0218	129	104	0	0		YP_006513540.1	Rv0218	RVBD_0218			transmembrane protein
gi|561108321|ref|NC_018143.2|	262253	262802	+	RVBD_0219	860	629	0	0		YP_006513541.1	Rv0219	RVBD_0219			transmembrane protein
gi|561108321|ref|NC_018143.2|	262811	264023	+	RVBD_0220	73	108	0	0		YP_006513542.1	Rv0220	RVBD_0220			esterase LipC
gi|561108321|ref|NC_018143.2|	264066	265476	+	RVBD_0221	330	480	5	12		YP_006513543.1	Rv0221	RVBD_0221			diacylglycerol acyltransferase
gi|561108321|ref|NC_018143.2|	265506	266295	+	RVBD_0222	94	116	1	5		YP_006513544.1	Rv0222	RVBD_0222			enoyl-CoA hydratase EchA1
gi|561108321|ref|NC_018143.2|	266300	267764	-	RVBD_0223c	30	46	1	0		YP_006513545.1	Rv0223c	RVBD_0223c			aldehyde dehydrogenase (NAD+)
gi|561108321|ref|NC_018143.2|	267862	268627	-	RVBD_0224c	0	0	0	0		YP_006513546.1	Rv0224c	RVBD_0224c			methyltransferase
gi|561108321|ref|NC_018143.2|	268662	269817	+	RVBD_0225	14	13	0	0		YP_006513547.1	Rv0225	RVBD_0225			glycosyltransferase
gi|561108321|ref|NC_018143.2|	269833	271564	-	RVBD_0226c	104	117	0	1		YP_006513548.1	Rv0226c	RVBD_0226c			transmembrane protein
gi|561108321|ref|NC_018143.2|	271573	272839	-	RVBD_0227c	0	1	0	0		YP_006513549.1	Rv0227c	RVBD_0227c			membrane protein
gi|561108321|ref|NC_018143.2|	273054	274278	+	RVBD_0228	72	45	0	1		YP_006513550.1	Rv0228	RVBD_0228			membrane acyltransferase
gi|561108321|ref|NC_018143.2|	274709	274904	-	RVBD_0229Ac	44	64	3	0		YP_006513552.1	Rv0229Ac	RVBD_0229Ac			antitoxin
gi|561108321|ref|NC_018143.2|	274305	274719	-	RVBD_0229c	267	243	1	1		YP_006513551.1	Rv0229c	RVBD_0229c			toxin
gi|561108321|ref|NC_018143.2|	274982	275963	-	RVBD_0230c	483	663	0	0		YP_006513553.1	Rv0230c	RVBD_0230c			phosphotriesterase Php
gi|561108321|ref|NC_018143.2|	276057	277764	+	RVBD_0231	2595	4344	29	34		YP_006513554.1	Rv0231	RVBD_0231			acyl-CoA dehydrogenase FadE4
gi|561108321|ref|NC_018143.2|	277898	278588	+	RVBD_0232	393	635	3	2		YP_006513555.1	Rv0232	RVBD_0232			transcriptional regulator TetR/AcrR-family
gi|561108321|ref|NC_018143.2|	278584	279529	+	RVBD_0233	172	206	8	10		YP_006513556.1	Rv0233	RVBD_0233			ribonucleoside-diphosphate reductase NrdB
gi|561108321|ref|NC_018143.2|	279604	281140	-	RVBD_0234c	164	195	0	0		YP_006513557.1	Rv0234c	RVBD_0234c			succinate-semialdehyde dehydrogenase [NADP] dependent GabD1
gi|561108321|ref|NC_018143.2|	281165	282614	-	RVBD_0235c	227	344	1	3		YP_006513558.1	Rv0235c	RVBD_0235c			transmembrane protein
gi|561108321|ref|NC_018143.2|	286897	287071	-	RVBD_0236A	4	0	0	0		YP_006513560.1	Rv0236A	RVBD_0236A			decaprenol phosphoarabinose-dependent alpha-1
gi|561108321|ref|NC_018143.2|	282648	286851	-	RVBD_0236c	181	133	2	0		YP_006513559.1	Rv0236c	RVBD_0236c			arabinofuranosyltransferase AftD
gi|561108321|ref|NC_018143.2|	287185	288352	+	RVBD_0237	99	144	0	3		YP_006513561.1	Rv0237	RVBD_0237			lipoprotein LpqI
gi|561108321|ref|NC_018143.2|	288427	289042	+	RVBD_0238	2606	2124	0	0		YP_006513562.1	Rv0238	RVBD_0238			transcriptional regulator TetR-family
gi|561108321|ref|NC_018143.2|	289103	289337	+	RVBD_0239	13	6	0	0		YP_006513563.1	Rv0239	RVBD_0239			antitoxin VapB24
gi|561108321|ref|NC_018143.2|	289344	289782	+	RVBD_0240	33	57	0	0		YP_006513564.1	Rv0240	RVBD_0240			toxin VapC24
gi|561108321|ref|NC_018143.2|	289811	290654	-	RVBD_0241c	54	80	0	0		YP_006513565.1	Rv0241c	RVBD_0241c			3-hydroxyacyl-thioester dehydratase HtdX
gi|561108321|ref|NC_018143.2|	290664	292029	-	RVBD_0242c	18	22	0	0		YP_006513566.1	Rv0242c	RVBD_0242c			3-oxoacyl-[acyl-carrier protein] reductase FabG4
gi|561108321|ref|NC_018143.2|	292170	293493	+	RVBD_0243	183	211	1	0		YP_006513567.1	Rv0243	RVBD_0243			acetyl-CoA acyltransferase FadA2
gi|561108321|ref|NC_018143.2|	293797	295633	-	RVBD_0244c	1217	1968	4739	5904		YP_006513568.1	Rv0244c	RVBD_0244c			acyl-CoA dehydrogenase FadE5
gi|561108321|ref|NC_018143.2|	296004	296493	+	RVBD_0245	14	36	0	0		YP_006513569.1	Rv0245	RVBD_0245			oxidoreductase
gi|561108321|ref|NC_018143.2|	296808	298119	+	RVBD_0246	718	1242	8	3		YP_006513570.1	Rv0246	RVBD_0246			integral membrane protein
gi|561108321|ref|NC_018143.2|	298115	298862	-	RVBD_0247c	98	216	14	5		YP_006513571.1	Rv0247c	RVBD_0247c			succinate dehydrogenase [iron-sulfur subunit]
gi|561108321|ref|NC_018143.2|	298862	300803	-	RVBD_0248c	355	738	41	57		YP_006513572.1	Rv0248c	RVBD_0248c			succinate dehydrogenase [iron-sulfur subunit] SdhA_1
gi|561108321|ref|NC_018143.2|	300833	301655	-	RVBD_0249c	156	554	10	11		YP_006513573.1	Rv0249c	RVBD_0249c			succinate dehydrogenase [membrane anchor subunit]
gi|561108321|ref|NC_018143.2|	301734	302028	-	RVBD_0250c	15	4	0	0		YP_006513574.1	Rv0250c	RVBD_0250c			hypothetical protein
gi|561108321|ref|NC_018143.2|	302172	302652	-	RVBD_0251c	441	613	0	1		YP_006513575.1	Rv0251c	RVBD_0251c			heat shock protein Hsp
gi|561108321|ref|NC_018143.2|	302865	305427	+	RVBD_0252	544	692	1	0		YP_006513576.1	Rv0252	RVBD_0252			nitrite reductase [NAD(P)H] large subunit NirB
gi|561108321|ref|NC_018143.2|	305452	305809	+	RVBD_0253	12	10	0	0		YP_006513577.1	Rv0253	RVBD_0253			nitrite reductase [NAD(P)H] small subunit NirD
gi|561108321|ref|NC_018143.2|	305824	306349	-	RVBD_0254c	47	53	0	0		YP_006513578.1	Rv0254c	RVBD_0254c			adenosylcobinamide kinase/adenosylcobinamide-phosphate guanylyltransferase CobU
gi|561108321|ref|NC_018143.2|	306373	307858	-	RVBD_0255c	68	68	0	0		YP_006513579.1	Rv0255c	RVBD_0255c			cobyric acid synthase CobQ1
gi|561108321|ref|NC_018143.2|	307876	309547	-	RVBD_0256c	3413	2827	12	8		YP_006513580.1	Rv0256c	RVBD_0256c			PPE family protein PPE2
gi|561108321|ref|NC_018143.2|	309698	310073	+	RVBD_0257	77	81	0	0		YP_006513581.1	Rv0257	RVBD_0257			hypothetical protein
gi|561108321|ref|NC_018143.2|	310293	310749	-	RVBD_0258c	48	59	0	0		YP_006513582.1	Rv0258c	RVBD_0258c			hypothetical protein
gi|561108321|ref|NC_018143.2|	310773	311517	-	RVBD_0259c	14	6	0	0		YP_006513583.1	Rv0259c	RVBD_0259c			hypothetical protein
gi|561108321|ref|NC_018143.2|	311513	312659	-	RVBD_0260c	3	13	1	1		YP_006513584.1	Rv0260c	RVBD_0260c			transcriptional regulator
gi|561108321|ref|NC_018143.2|	312758	314168	-	RVBD_0261c	798	1032	1	1		YP_006513585.1	Rv0261c	RVBD_0261c			integral membrane nitrite extrusion protein NarK3
gi|561108321|ref|NC_018143.2|	314308	314854	-	RVBD_0262c	25	28	0	0		YP_006513586.1	Rv0262c	RVBD_0262c			aminoglycoside 2'-N-acetyltransferase Aac
gi|561108321|ref|NC_018143.2|	314863	315766	-	RVBD_0263c	651	528	1	3		YP_006513587.1	Rv0263c	RVBD_0263c			allophanate hydrolase
gi|561108321|ref|NC_018143.2|	315782	316415	-	RVBD_0264c	1006	927	1	0		YP_006513588.1	Rv0264c	RVBD_0264c			hypothetical protein
gi|561108321|ref|NC_018143.2|	316510	317503	-	RVBD_0265c	197	204	1	0		YP_006513589.1	Rv0265c	RVBD_0265c			iron complex transporter substrate-binding protein
gi|561108321|ref|NC_018143.2|	317524	321154	-	RVBD_0266c	3201	2486	10	4		YP_006513590.1	Rv0266c	RVBD_0266c			5-oxoprolinase OplA
gi|561108321|ref|NC_018143.2|	321330	322722	+	RVBD_0267	3358	3277	9	4		YP_006513591.1	Rv0267	RVBD_0267			integral membrane nitrite extrusion protein NarU
gi|561108321|ref|NC_018143.2|	322763	323273	-	RVBD_0268c	2876	2683	6	10		YP_006513592.1	Rv0268c	RVBD_0268c			prevent-host-death family protein
gi|561108321|ref|NC_018143.2|	323337	324531	-	RVBD_0269c	749	722	5	5		YP_006513593.1	Rv0269c	RVBD_0269c			DNA polymerase LigD
gi|561108321|ref|NC_018143.2|	324566	326249	+	RVBD_0270	43755	38074	25176	30482		YP_006513594.1	Rv0270	RVBD_0270			fatty-acid-CoA ligase FadD2
gi|561108321|ref|NC_018143.2|	326265	328461	-	RVBD_0271c	1095	1450	0	1		YP_006513595.1	Rv0271c	RVBD_0271c			acyl-CoA dehydrogenase FadE6
gi|561108321|ref|NC_018143.2|	328574	329708	-	RVBD_0272c	59	104	1	4		YP_006513596.1	Rv0272c	RVBD_0272c			hypothetical protein
gi|561108321|ref|NC_018143.2|	329704	330325	-	RVBD_0273c	105	123	0	6		YP_006513597.1	Rv0273c	RVBD_0273c			transcriptional regulator
gi|561108321|ref|NC_018143.2|	330421	331003	+	RVBD_0274	83	76	1	1		YP_006513598.1	Rv0274	RVBD_0274			glyoxalase/bleomycin resistance protein/dioxygenase
gi|561108321|ref|NC_018143.2|	330932	331658	-	RVBD_0275c	134	108	0	1		YP_006513599.1	Rv0275c	RVBD_0275c			transcriptional regulator TetR-family
gi|561108321|ref|NC_018143.2|	331747	332668	+	RVBD_0276	908	859	3	8		YP_006513600.1	Rv0276	RVBD_0276			hypothetical protein
gi|561108321|ref|NC_018143.2|	333159	333333	-	RVBD_0277Ac	369	241	1	3		YP_006513602.1	Rv0277Ac	RVBD_0277Ac			antitoxin
gi|561108321|ref|NC_018143.2|	332707	333136	-	RVBD_0277c	2276	1735	2	2		YP_006513601.1	Rv0277c	RVBD_0277c			toxin VapC25
gi|561108321|ref|NC_018143.2|	333436	336310	-	RVBD_0278c	196	162	0	0		YP_006513603.1	Rv0278c	RVBD_0278c			PE-PGRS family protein PE_PGRS3
gi|561108321|ref|NC_018143.2|	336559	339073	-	RVBD_0279c	84	42	1	3		YP_006513604.1	Rv0279c	RVBD_0279c			PE-PGRS family protein PE_PGRS4
gi|561108321|ref|NC_018143.2|	339363	340974	+	RVBD_0280	2473	1599	3	4		YP_006513606.1	Rv0280	RVBD_0280			PPE family protein PPE3
gi|561108321|ref|NC_018143.2|	340997	341906	+	RVBD_0281	296	300	3	7		YP_006513607.1	Rv0281	RVBD_0281			s-adenosylmethionine-dependent methyltransferase
gi|561108321|ref|NC_018143.2|	342129	344025	+	RVBD_0282	22	21	0	0		YP_006513608.1	Rv0282	RVBD_0282			ESX-3 secretion system protein EccA3
gi|561108321|ref|NC_018143.2|	344021	345638	+	RVBD_0283	0	0	1	0		YP_006513609.1	Rv0283	RVBD_0283			ESX-3 secretion system protein EccB3
gi|561108321|ref|NC_018143.2|	345634	349627	+	RVBD_0284	0	0	0	0		YP_006513610.1	Rv0284	RVBD_0284			ESX-3 secretion system protein EccC3
gi|561108321|ref|NC_018143.2|	349623	349932	+	RVBD_0285	0	0	0	0		YP_006513611.1	Rv0285	RVBD_0285			PE family protein PE5
gi|561108321|ref|NC_018143.2|	349934	351476	+	RVBD_0286	0	0	0	0		YP_006513612.1	Rv0286	RVBD_0286			PPE family protein PPE4
gi|561108321|ref|NC_018143.2|	351524	351818	+	RVBD_0287	0	0	0	0		YP_006513613.1	Rv0287	RVBD_0287			ESAT-6 like protein EsxG
gi|561108321|ref|NC_018143.2|	351847	352138	+	RVBD_0288	0	1	0	0		YP_006513614.1	Rv0288	RVBD_0288			antigen 7 EsxH
gi|561108321|ref|NC_018143.2|	352148	353036	+	RVBD_0289	3	0	0	0		YP_006513615.1	Rv0289	RVBD_0289			ESX-3 secretion-associated protein EspG3
gi|561108321|ref|NC_018143.2|	353082	354501	+	RVBD_0290	0	0	0	0		YP_006513616.1	Rv0290	RVBD_0290			ESX-3 secretion system protein EccD3
gi|561108321|ref|NC_018143.2|	354497	355883	+	RVBD_0291	0	0	0	0		YP_006513617.1	Rv0291	RVBD_0291			membrane-anchored mycosin MycP3
gi|561108321|ref|NC_018143.2|	355879	356875	+	RVBD_0292	8	1	0	0		YP_006513618.1	Rv0292	RVBD_0292			ESX-3 secretion system protein EccE3
gi|561108321|ref|NC_018143.2|	356861	358064	-	RVBD_0293c	1981	1699	3	3		YP_006513619.1	Rv0293c	RVBD_0293c			hypothetical protein
gi|561108321|ref|NC_018143.2|	358170	358956	+	RVBD_0294	214	241	7	3		YP_006513620.1	Rv0294	RVBD_0294			trans-aconitate methyltransferase Tam
gi|561108321|ref|NC_018143.2|	358944	359748	-	RVBD_0295c	76	89	0	0		YP_006513621.1	Rv0295c	RVBD_0295c			trehalose sulfotransferase
gi|561108321|ref|NC_018143.2|	359757	361155	-	RVBD_0296c	2666	2468	8	3		YP_006513622.1	Rv0296c	RVBD_0296c			sulfatase
gi|561108321|ref|NC_018143.2|	361333	363109	+	RVBD_0297	314	196	2	4		YP_006513623.1	Rv0297	RVBD_0297			PE-PGRS family protein PE_PGRS5
gi|561108321|ref|NC_018143.2|	363251	363479	+	RVBD_0298	190	179	5	3		YP_006513624.1	Rv0298	RVBD_0298			antitoxin
gi|561108321|ref|NC_018143.2|	363475	363778	+	RVBD_0299	119	127	0	0		YP_006513625.1	Rv0299	RVBD_0299			toxin
gi|561108321|ref|NC_018143.2|	363825	364047	+	RVBD_0300	76	92	0	0		YP_006513626.1	Rv0300	RVBD_0300			antitoxin VapB2
gi|561108321|ref|NC_018143.2|	364043	364469	+	RVBD_0301	44	44	1	1		YP_006513627.1	Rv0301	RVBD_0301			toxin VapC2
gi|561108321|ref|NC_018143.2|	364604	365237	+	RVBD_0302	59	73	2	0		YP_006513628.1	Rv0302	RVBD_0302			transcriptional regulator TetR/AcrR-family
gi|561108321|ref|NC_018143.2|	365233	366142	+	RVBD_0303	1219	1442	4	1		YP_006513629.1	Rv0303	RVBD_0303			light-dependent protochlorophyllide reductase
gi|561108321|ref|NC_018143.2|	366149	372764	-	RVBD_0304c	3691	5769	26	39		YP_006513630.1	Rv0304c	RVBD_0304c			PPE family protein PPE5
gi|561108321|ref|NC_018143.2|	372819	375711	-	RVBD_0305c	831	1109	5	5		YP_006513631.1	Rv0305c	RVBD_0305c			PPE family protein PPE6
gi|561108321|ref|NC_018143.2|	375913	376585	+	RVBD_0306	186	232	0	0		YP_006513632.1	Rv0306	RVBD_0306			cob(II)yrinic acid a
gi|561108321|ref|NC_018143.2|	376572	377055	-	RVBD_0307c	486	444	0	0		YP_006513633.1	Rv0307c	RVBD_0307c			hypothetical protein
gi|561108321|ref|NC_018143.2|	377112	377829	+	RVBD_0308	221	285	0	2		YP_006513634.1	Rv0308	RVBD_0308			integral membrane protein
gi|561108321|ref|NC_018143.2|	377930	378587	+	RVBD_0309	856	1203	12	14		YP_006513635.1	Rv0309	RVBD_0309			exported protein
gi|561108321|ref|NC_018143.2|	378656	379148	-	RVBD_0310c	19	28	0	1		YP_006513636.1	Rv0310c	RVBD_0310c			hypothetical protein
gi|561108321|ref|NC_018143.2|	379171	380401	+	RVBD_0311	72	84	6	3		YP_006513637.1	Rv0311	RVBD_0311			hypothetical protein
gi|561108321|ref|NC_018143.2|	380555	382418	+	RVBD_0312	264	176	0	0		YP_006513638.1	Rv0312	RVBD_0312			proline and threonine rich protein
gi|561108321|ref|NC_018143.2|	382489	382876	+	RVBD_0313	161	173	1	1		YP_006513639.1	Rv0313	RVBD_0313			hypothetical protein
gi|561108321|ref|NC_018143.2|	382878	383541	-	RVBD_0314c	1016	758	2	1		YP_006513640.1	Rv0314c	RVBD_0314c			membrane protein
gi|561108321|ref|NC_018143.2|	383601	384486	+	RVBD_0315	319	224	1	0		YP_006513641.1	Rv0315	RVBD_0315			beta-1
gi|561108321|ref|NC_018143.2|	384534	385149	+	RVBD_0316	34	44	0	0		YP_006513642.1	Rv0316	RVBD_0316			muconolactone delta-isomerase
gi|561108321|ref|NC_018143.2|	385172	385943	-	RVBD_0317c	1696	1576	2	0		YP_006513643.1	Rv0317c	RVBD_0317c			glycerophosphoryl diester phosphodiesterase GlpQ2
gi|561108321|ref|NC_018143.2|	386304	387099	-	RVBD_0318c	675	818	2	4		YP_006513644.1	Rv0318c	RVBD_0318c			ZIP family zinc transporter
gi|561108321|ref|NC_018143.2|	387147	387816	+	RVBD_0319	53	58	7	8		YP_006513645.1	Rv0319	RVBD_0319			pyrrolidone-carboxylate peptidase Pcp
gi|561108321|ref|NC_018143.2|	387887	388550	+	RVBD_0320	195	256	1	1		YP_006513646.1	Rv0320	RVBD_0320			exported protein NLP/P60 family member
gi|561108321|ref|NC_018143.2|	388581	389154	+	RVBD_0321	179	163	2	1		YP_006513647.1	Rv0321	RVBD_0321			deoxycytidine triphosphate deaminase Dcd
gi|561108321|ref|NC_018143.2|	389259	390591	+	RVBD_0322	181	348	3	13		YP_006513648.1	Rv0322	RVBD_0322			UDP-glucose 6-dehydrogenase UdgA
gi|561108321|ref|NC_018143.2|	390579	391251	-	RVBD_0323c	14	52	0	0		YP_006513649.1	Rv0323c	RVBD_0323c			hypothetical protein
gi|561108321|ref|NC_018143.2|	391351	392032	+	RVBD_0324	58	81	0	0		YP_006513650.1	Rv0324	RVBD_0324			transcriptional regulator ArsR-family
gi|561108321|ref|NC_018143.2|	392038	392263	+	RVBD_0325	126	168	1	2		YP_006513651.1	Rv0325	RVBD_0325			hypothetical protein
gi|561108321|ref|NC_018143.2|	392272	392728	+	RVBD_0326	17	23	0	0		YP_006513652.1	Rv0326	RVBD_0326			hypothetical protein
gi|561108321|ref|NC_018143.2|	392695	394045	-	RVBD_0327c	639	697	0	5		YP_006513653.1	Rv0327c	RVBD_0327c			cytochrome P450 135A1 Cyp135A1
gi|561108321|ref|NC_018143.2|	394110	394713	+	RVBD_0328	65	207	0	0		YP_006513654.1	Rv0328	RVBD_0328			transcriptional regulator TetR/AcrR-family
gi|561108321|ref|NC_018143.2|	394693	395320	-	RVBD_0329c	92	84	1	0		YP_006513655.1	Rv0329c	RVBD_0329c			hypothetical protein
gi|561108321|ref|NC_018143.2|	395346	396087	-	RVBD_0330c	75	79	0	0		YP_006513656.1	Rv0330c	RVBD_0330c			hypothetical protein
gi|561108321|ref|NC_018143.2|	396200	397367	+	RVBD_0331	2253	2693	9	5		YP_006513657.1	Rv0331	RVBD_0331			oxidoreductase
gi|561108321|ref|NC_018143.2|	397441	398227	+	RVBD_0332	1038	1260	1	1		YP_006513658.1	Rv0332	RVBD_0332			hypothetical protein
gi|561108321|ref|NC_018143.2|	398253	398628	+	RVBD_0333	6	27	0	0		YP_006513659.1	Rv0333	RVBD_0333			hypothetical protein
gi|561108321|ref|NC_018143.2|	398657	399524	+	RVBD_0334	0	6	0	0		YP_006513660.1	Rv0334	RVBD_0334			glucose-1-phosphate thymidylyltransferase RmlA
gi|561108321|ref|NC_018143.2|	399534	400050	-	RVBD_0335c	3	12	0	0		YP_006513661.1	Rv0335c	RVBD_0335c			PE family protein PE6
gi|561108321|ref|NC_018143.2|	400191	401703	+	RVBD_0336	5029	4237	13	15		YP_006513662.1	Rv0336	RVBD_0336			13E12 repeat family protein
gi|561108321|ref|NC_018143.2|	401872	403162	-	RVBD_0337c	25	63	1	0		YP_006513663.1	Rv0337c	RVBD_0337c			aspartate aminotransferase AspC
gi|561108321|ref|NC_018143.2|	403192	405841	-	RVBD_0338c	634	768	2	1		YP_006513664.1	Rv0338c	RVBD_0338c			oxidoreductase
gi|561108321|ref|NC_018143.2|	405949	408448	-	RVBD_0339c	132	97	0	0		YP_006513665.1	Rv0339c	RVBD_0339c			transcriptional regulator
gi|561108321|ref|NC_018143.2|	408633	409173	+	RVBD_0340	58	63	0	0		YP_006513666.1	Rv0340	RVBD_0340			hypothetical protein
gi|561108321|ref|NC_018143.2|	409361	410801	+	RVBD_0341	3128	2799	2	1		YP_006513667.1	Rv0341	RVBD_0341			isoniazid inducible protein IniB
gi|561108321|ref|NC_018143.2|	410837	412760	+	RVBD_0342	1117	1301	5	4		YP_006513668.1	Rv0342	RVBD_0342			isoniazid inducible protein IniA
gi|561108321|ref|NC_018143.2|	412756	414238	+	RVBD_0343	248	286	5	2		YP_006513669.1	Rv0343	RVBD_0343			isoniazid inducible protein IniC
gi|561108321|ref|NC_018143.2|	414380	414941	-	RVBD_0344c	272	429	4	5		YP_006513670.1	Rv0344c	RVBD_0344c			lipoprotein LpqJ
gi|561108321|ref|NC_018143.2|	415049	415460	+	RVBD_0345	125	143	0	0		YP_006513671.1	Rv0345	RVBD_0345			hypothetical protein
gi|561108321|ref|NC_018143.2|	415501	416965	-	RVBD_0346c	711	1162	4	9		YP_006513672.1	Rv0346c	RVBD_0346c			l-asparagine permease AnsP2
gi|561108321|ref|NC_018143.2|	417303	418290	+	RVBD_0347	14	27	0	0		YP_006513673.1	Rv0347	RVBD_0347			membrane protein
gi|561108321|ref|NC_018143.2|	418292	418946	+	RVBD_0348	61	109	0	1		YP_006513674.1	Rv0348	RVBD_0348			transcriptional regulator
gi|561108321|ref|NC_018143.2|	418948	419608	+	RVBD_0349	1654	2598	1	2		YP_006513675.1	Rv0349	RVBD_0349			hypothetical protein
gi|561108321|ref|NC_018143.2|	419834	421712	+	RVBD_0350	0	0	0	0		YP_006513676.1	Rv0350	RVBD_0350			chaperone DnaK
gi|561108321|ref|NC_018143.2|	421708	422416	+	RVBD_0351	0	0	0	0		YP_006513677.1	Rv0351	RVBD_0351			protein GrpE
gi|561108321|ref|NC_018143.2|	422451	423639	+	RVBD_0352	2	2	0	0		YP_006513678.1	Rv0352	RVBD_0352			chaperone DnaJ1
gi|561108321|ref|NC_018143.2|	423638	424019	+	RVBD_0353	78	359	1	1		YP_006513679.1	Rv0353	RVBD_0353			heat shock protein transcriptional repressor HspR
gi|561108321|ref|NC_018143.2|	424143	424695	-	RVBD_0354c	1761	2628	2	6		YP_006513680.1	Rv0354c	RVBD_0354c			PPE family protein PPE7
gi|561108321|ref|NC_018143.2|	424777	434680	-	RVBD_0355c	10127	18396	58	51		YP_006513681.1	Rv0355c	RVBD_0355c			PPE family protein PPE8
gi|561108321|ref|NC_018143.2|	434830	435475	-	RVBD_0356c	1080	976	3	2		YP_006513682.1	Rv0356c	RVBD_0356c			hypothetical protein
gi|561108321|ref|NC_018143.2|	435471	436770	-	RVBD_0357c	724	674	1	0		YP_006513683.1	Rv0357c	RVBD_0357c			adenylosuccinate synthetase PurA
gi|561108321|ref|NC_018143.2|	436860	437508	+	RVBD_0358	59	62	0	0		YP_006513684.1	Rv0358	RVBD_0358			hypothetical protein
gi|561108321|ref|NC_018143.2|	437518	438298	+	RVBD_0359	587	511	0	0		YP_006513685.1	Rv0359	RVBD_0359			integral membrane protein
gi|561108321|ref|NC_018143.2|	438302	438740	-	RVBD_0360c	103	137	1	0		YP_006513686.1	Rv0360c	RVBD_0360c			hypothetical protein
gi|561108321|ref|NC_018143.2|	438822	439650	+	RVBD_0361	40	62	0	0		YP_006513687.1	Rv0361	RVBD_0361			membrane protein
gi|561108321|ref|NC_018143.2|	439871	441254	+	RVBD_0362	75	154	1	1		YP_006513688.1	Rv0362	RVBD_0362			Mg2+ transport transmembrane protein MgtE
gi|561108321|ref|NC_018143.2|	441265	442300	-	RVBD_0363c	3	4	0	0		YP_006513689.1	Rv0363c	RVBD_0363c			fructose-bisphosphate aldolase Fba
gi|561108321|ref|NC_018143.2|	442395	443079	+	RVBD_0364	4	2	1	0		YP_006513690.1	Rv0364	RVBD_0364			membrane-associated protein
gi|561108321|ref|NC_018143.2|	443067	444198	-	RVBD_0365c	281	371	3	2		YP_006513691.1	Rv0365c	RVBD_0365c			hypothetical protein
gi|561108321|ref|NC_018143.2|	444222	444816	-	RVBD_0366c	74	57	0	0		YP_006513692.1	Rv0366c	RVBD_0366c			hypothetical protein
gi|561108321|ref|NC_018143.2|	444844	445234	-	RVBD_0367c	16	27	0	0		YP_006513693.1	Rv0367c	RVBD_0367c			hypothetical protein
gi|561108321|ref|NC_018143.2|	445314	446526	-	RVBD_0368c	1198	1051	2	3		YP_006513694.1	Rv0368c	RVBD_0368c			hypothetical protein
gi|561108321|ref|NC_018143.2|	446531	447047	-	RVBD_0369c	12	17	0	0		YP_006513695.1	Rv0369c	RVBD_0369c			membrane oxidoreductase
gi|561108321|ref|NC_018143.2|	447147	448044	-	RVBD_0370c	100	128	2	2		YP_006513696.1	Rv0370c	RVBD_0370c			oxidoreductase
gi|561108321|ref|NC_018143.2|	448040	448634	-	RVBD_0371c	0	0	0	0		YP_006513697.1	Rv0371c	RVBD_0371c			hypothetical protein
gi|561108321|ref|NC_018143.2|	448630	449386	-	RVBD_0372c	14	12	0	0		YP_006513698.1	Rv0372c	RVBD_0372c			xanthine dehydrogenase accessory factor
gi|561108321|ref|NC_018143.2|	449404	451804	-	RVBD_0373c	200	225	5	8		YP_006513699.1	Rv0373c	RVBD_0373c			carbon-monoxide dehydrogenase large subunit
gi|561108321|ref|NC_018143.2|	451800	452280	-	RVBD_0374c	2	12	0	0		YP_006513700.1	Rv0374c	RVBD_0374c			carbon-monoxide dehydrogenase small subunit
gi|561108321|ref|NC_018143.2|	452294	453155	-	RVBD_0375c	432	341	1	5		YP_006513701.2	Rv0375c	RVBD_0375c			carbon-monoxide dehydrogenase medium subunit
gi|561108321|ref|NC_018143.2|	453230	454373	-	RVBD_0376c	413	386	7	8		YP_006513702.1	Rv0376c	RVBD_0376c			xanthine dehydrogenase accessory factor
gi|561108321|ref|NC_018143.2|	454421	455387	+	RVBD_0377	9	5	0	0		YP_006513703.1	Rv0377	RVBD_0377			transcriptional regulator LysR-family
gi|561108321|ref|NC_018143.2|	455637	455859	+	RVBD_0378	0	0	0	0		YP_006513704.1	Rv0378	RVBD_0378			glycine rich protein
gi|561108321|ref|NC_018143.2|	455977	456193	+	RVBD_0379	146	146	1	0		YP_006513705.1	Rv0379	RVBD_0379			preprotein translocase subunit SecE2
gi|561108321|ref|NC_018143.2|	456268	456820	-	RVBD_0380c	22	18	1	1		YP_006513706.1	Rv0380c	RVBD_0380c			methyltransferase
gi|561108321|ref|NC_018143.2|	456915	457824	-	RVBD_0381c	307	306	0	0		YP_006513707.1	Rv0381c	RVBD_0381c			hypothetical protein
gi|561108321|ref|NC_018143.2|	457841	458381	-	RVBD_0382c	0	0	0	0		YP_006513708.1	Rv0382c	RVBD_0382c			orotate phosphoribosyltransferase PyrE
gi|561108321|ref|NC_018143.2|	458461	459316	-	RVBD_0383c	7	6	0	0		YP_006513709.1	Rv0383c	RVBD_0383c			secreted protein
gi|561108321|ref|NC_018143.2|	459456	462003	-	RVBD_0384c	2	10	0	0		YP_006513710.1	Rv0384c	RVBD_0384c			endopeptidase ATP binding protein chain B ClpB
gi|561108321|ref|NC_018143.2|	462135	463308	+	RVBD_0385	989	1520	6	7		YP_006513711.1	Rv0385	RVBD_0385			oxidoreductase
gi|561108321|ref|NC_018143.2|	463411	466669	+	RVBD_0386	2810	2395	11	21		YP_006513712.1	Rv0386	RVBD_0386			transcriptional regulator LuxR/UhpA-family
gi|561108321|ref|NC_018143.2|	466672	468004	-	RVBD_0387c	1926	1268	0	1		YP_006513713.1	Rv0387c	RVBD_0387c			PPE family protein
gi|561108321|ref|NC_018143.2|	468337	469597	+	RVBD_0389	1383	1246	8	1		YP_006513714.1	Rv0389	RVBD_0389			phosphoribosylglycinamide formyltransferase 2 PurT
gi|561108321|ref|NC_018143.2|	469593	470016	+	RVBD_0390	153	119	0	1		YP_006513715.1	Rv0390	RVBD_0390			hypothetical protein
gi|561108321|ref|NC_018143.2|	470012	471233	+	RVBD_0391	1107	940	0	0		YP_006513716.1	Rv0391	RVBD_0391			O-succinylhomoserine sulfhydrylase MetZ
gi|561108321|ref|NC_018143.2|	471229	472642	-	RVBD_0392c	122	191	2	0		YP_006513717.1	Rv0392c	RVBD_0392c			NADH dehydrogenase NdhA
gi|561108321|ref|NC_018143.2|	472783	474109	+	RVBD_0393	348	257	6	7		YP_006513718.1	Rv0393	RVBD_0393			13E12 repeat family protein
gi|561108321|ref|NC_018143.2|	474124	474844	-	RVBD_0394c	341	258	0	0		YP_006513719.1	Rv0394c	RVBD_0394c			secreted protein
gi|561108321|ref|NC_018143.2|	474942	475347	+	RVBD_0395	274	212	1	2		YP_006513720.1	Rv0395	RVBD_0395			hypothetical protein
gi|561108321|ref|NC_018143.2|	475352	475745	+	RVBD_0396	188	129	0	2		YP_006513721.1	Rv0396	RVBD_0396			hypothetical protein
gi|561108321|ref|NC_018143.2|	475818	476187	+	RVBD_0397	140	159	3	1		YP_006513722.1	Rv0397	RVBD_0397			13E12 repeat family protein
gi|561108321|ref|NC_018143.2|	476396	476645	+	RVBD_0397A	53	49	0	0		YP_006513723.1	Rv0397A	RVBD_0397A			hypothetical protein
gi|561108321|ref|NC_018143.2|	476681	477323	-	RVBD_0398c	656	549	0	0		YP_006513724.1	Rv0398c	RVBD_0398c			secreted protein
gi|561108321|ref|NC_018143.2|	477329	478559	-	RVBD_0399c	130	156	0	3		YP_006513725.1	Rv0399c	RVBD_0399c			lipoprotein LpqK
gi|561108321|ref|NC_018143.2|	478568	479756	-	RVBD_0400c	14	6	1	1		YP_006513726.1	Rv0400c	RVBD_0400c			acyl-CoA dehydrogenase FadE7
gi|561108321|ref|NC_018143.2|	479791	480163	+	RVBD_0401	7	2	0	0		YP_006513727.1	Rv0401	RVBD_0401			transmembrane protein
gi|561108321|ref|NC_018143.2|	480357	483234	-	RVBD_0402c	404	752	5	4		YP_006513728.1	Rv0402c	RVBD_0402c			transmembrane transporter MmpL1
gi|561108321|ref|NC_018143.2|	483230	483659	-	RVBD_0403c	67	112	0	0		YP_006513729.1	Rv0403c	RVBD_0403c			membrane protein MmpS1
gi|561108321|ref|NC_018143.2|	483979	485737	+	RVBD_0404	213	413	4	4		YP_006513730.1	Rv0404	RVBD_0404			fatty-acid-AMP ligase FadD30
gi|561108321|ref|NC_018143.2|	485733	489942	+	RVBD_0405	1056	1525	6	1		YP_006513731.1	Rv0405	RVBD_0405			polyketide synthase Pks6
gi|561108321|ref|NC_018143.2|	489889	490708	-	RVBD_0406c	84	185	0	1		YP_006513732.1	Rv0406c	RVBD_0406c			beta-lactamase like protein
gi|561108321|ref|NC_018143.2|	490785	491796	+	RVBD_0407	674	1329	0	1		YP_006513733.1	Rv0407	RVBD_0407			F420-dependent glucose-6-phosphate dehydrogenase Fgd1
gi|561108321|ref|NC_018143.2|	491788	493861	+	RVBD_0408	776	1281	9	7		YP_006513734.1	Rv0408	RVBD_0408			phosphate acetyltransferase Pta
gi|561108321|ref|NC_018143.2|	493853	495011	+	RVBD_0409	322	434	0	0		YP_006513735.1	Rv0409	RVBD_0409			acetate kinase AckA
gi|561108321|ref|NC_018143.2|	495064	497317	-	RVBD_0410c	3	6	1	1		YP_006513736.1	Rv0410c	RVBD_0410c			serine/threonine-protein kinase PknG
gi|561108321|ref|NC_018143.2|	497316	498303	-	RVBD_0411c	0	2	0	0		YP_006513737.1	Rv0411c	RVBD_0411c			glutamine-binding lipoprotein GlnH
gi|561108321|ref|NC_018143.2|	498302	499622	-	RVBD_0412c	3	15	0	0		YP_006513738.1	Rv0412c	RVBD_0412c			membrane protein
gi|561108321|ref|NC_018143.2|	499715	500369	+	RVBD_0413	247	224	10	11		YP_006513739.1	Rv0413	RVBD_0413			mutator protein MutT3
gi|561108321|ref|NC_018143.2|	500352	501021	-	RVBD_0414c	21	15	0	0		YP_006513740.1	Rv0414c	RVBD_0414c			thiamine-phosphate pyrophosphorylase ThiE
gi|561108321|ref|NC_018143.2|	501150	502173	+	RVBD_0415	0	1	0	0		YP_006513741.1	Rv0415	RVBD_0415			glycine oxidase ThiO
gi|561108321|ref|NC_018143.2|	502169	502376	+	RVBD_0416	0	0	0	0		YP_006513742.1	Rv0416	RVBD_0416			thiamine biosynthesis protein ThiS
gi|561108321|ref|NC_018143.2|	502368	503127	+	RVBD_0417	0	0	0	0		YP_006513743.1	Rv0417	RVBD_0417			thiamine biosynthesis protein ThiG
gi|561108321|ref|NC_018143.2|	503498	505001	+	RVBD_0418	49	59	1	6		YP_006513744.1	Rv0418	RVBD_0418			lipoprotein aminopeptidase LpqL
gi|561108321|ref|NC_018143.2|	505088	506585	+	RVBD_0419	326	334	1	2		YP_006513745.1	Rv0419	RVBD_0419			lipoprotein peptidase LpqM
gi|561108321|ref|NC_018143.2|	506563	506974	-	RVBD_0420c	48	59	7	7		YP_006513746.1	Rv0420c	RVBD_0420c			transmembrane protein
gi|561108321|ref|NC_018143.2|	507134	507764	-	RVBD_0421c	10	15	0	0		YP_006513747.1	Rv0421c	RVBD_0421c			hypothetical protein
gi|561108321|ref|NC_018143.2|	507760	508558	-	RVBD_0422c	0	0	0	0		YP_006513748.1	Rv0422c	RVBD_0422c			phosphomethylpyrimidine kinase ThiD
gi|561108321|ref|NC_018143.2|	508584	510228	-	RVBD_0423c	0	0	0	0		YP_006513749.1	Rv0423c	RVBD_0423c			thiamine biosynthesis protein ThiC
gi|561108321|ref|NC_018143.2|	510379	510655	-	RVBD_0424c	350	267	0	0		YP_006513750.1	Rv0424c	RVBD_0424c			hypothetical protein
gi|561108321|ref|NC_018143.2|	510704	515324	-	RVBD_0425c	555	411	2	0		YP_006513751.1	Rv0425c	RVBD_0425c			HAD ATPase
gi|561108321|ref|NC_018143.2|	515375	515819	-	RVBD_0426c	5683	4916	12	11		YP_006513752.1	Rv0426c	RVBD_0426c			transmembrane protein
gi|561108321|ref|NC_018143.2|	516019	516895	-	RVBD_0427c	433	425	3	1		YP_006513753.1	Rv0427c	RVBD_0427c			exodeoxyribonuclease III protein XthA
gi|561108321|ref|NC_018143.2|	516897	517806	-	RVBD_0428c	797	747	1	2		YP_006513754.1	Rv0428c	RVBD_0428c			N-acetyltransferase
gi|561108321|ref|NC_018143.2|	517805	518399	-	RVBD_0429c	53	71	0	0		YP_006513755.1	Rv0429c	RVBD_0429c			polypeptide deformylase Def
gi|561108321|ref|NC_018143.2|	518735	519044	+	RVBD_0430	493	428	0	0		YP_006513756.1	Rv0430	RVBD_0430			hypothetical protein
gi|561108321|ref|NC_018143.2|	519075	519570	+	RVBD_0431	1240	1274	1	1		YP_006513757.1	Rv0431	RVBD_0431			hypothetical protein
gi|561108321|ref|NC_018143.2|	519602	520325	+	RVBD_0432	582	684	0	0		YP_006513758.1	Rv0432	RVBD_0432			periplasmic superoxide dismutase [Cu-Zn] SodC
gi|561108321|ref|NC_018143.2|	520326	521457	+	RVBD_0433	1280	1490	6	4		YP_006513759.1	Rv0433	RVBD_0433			carboxylate-amine ligase
gi|561108321|ref|NC_018143.2|	521516	522170	+	RVBD_0434	403	367	0	1		YP_006513760.1	Rv0434	RVBD_0434			hypothetical protein
gi|561108321|ref|NC_018143.2|	522349	524536	-	RVBD_0435c	627	503	2	5		YP_006513761.1	Rv0435c	RVBD_0435c			transitional endoplasmic reticulum ATPase
gi|561108321|ref|NC_018143.2|	524532	525393	-	RVBD_0436c	243	222	0	0		YP_006513762.1	Rv0436c	RVBD_0436c			CDP-diacylglycerol-serine O-phosphatidyltransferase PssA
gi|561108321|ref|NC_018143.2|	525389	526085	-	RVBD_0437c	469	416	0	0		YP_006513763.1	Rv0437c	RVBD_0437c			phosphatidylserine decarboxylase Psd
gi|561108321|ref|NC_018143.2|	526145	527363	-	RVBD_0438c	976	870	16	14		YP_006513764.1	Rv0438c	RVBD_0438c			molybdopterin biosynthesis protein MoeA2
gi|561108321|ref|NC_018143.2|	527381	528317	-	RVBD_0439c	1476	1451	5	7		YP_006513765.1	Rv0439c	RVBD_0439c			oxidoreductase
gi|561108321|ref|NC_018143.2|	528610	530233	+	RVBD_0440	0	1	0	0		YP_006513766.1	Rv0440	RVBD_0440			chaperonin 2 GroEL2
gi|561108321|ref|NC_018143.2|	530298	530727	-	RVBD_0441c	58	110	0	0		YP_006513767.1	Rv0441c	RVBD_0441c			hypothetical protein
gi|561108321|ref|NC_018143.2|	530753	532217	-	RVBD_0442c	1097	1557	5	4		YP_006513768.1	Rv0442c	RVBD_0442c			PPE family protein PPE10
gi|561108321|ref|NC_018143.2|	532398	532914	+	RVBD_0443	492	749	14	10		YP_006513769.1	Rv0443	RVBD_0443			hypothetical protein
gi|561108321|ref|NC_018143.2|	533093	533792	-	RVBD_0444c	64	70	0	0		YP_006513770.1	Rv0444c	RVBD_0444c			anti-sigma factor RskA
gi|561108321|ref|NC_018143.2|	533835	534399	-	RVBD_0445c	687	847	3	2		YP_006513771.1	Rv0445c	RVBD_0445c			RNA polymerase sigma factor SigK
gi|561108321|ref|NC_018143.2|	534447	535218	-	RVBD_0446c	1672	2212	3	6		YP_006513772.1	Rv0446c	RVBD_0446c			transmembrane protein
gi|561108321|ref|NC_018143.2|	535226	536510	-	RVBD_0447c	579	698	4	6		YP_006513773.1	Rv0447c	RVBD_0447c			cyclopropane-fatty-acyl-phospholipid synthase UfaA1
gi|561108321|ref|NC_018143.2|	536506	537172	-	RVBD_0448c	293	309	1	2		YP_006513774.1	Rv0448c	RVBD_0448c			hypothetical protein
gi|561108321|ref|NC_018143.2|	537231	538551	-	RVBD_0449c	1538	2033	14	8		YP_006513775.1	Rv0449c	RVBD_0449c			hypothetical protein
gi|561108321|ref|NC_018143.2|	538590	541494	-	RVBD_0450c	911	1335	5	7		YP_006513776.1	Rv0450c	RVBD_0450c			transmembrane transporter MmpL4
gi|561108321|ref|NC_018143.2|	541490	541913	-	RVBD_0451c	49	140	0	0		YP_006513777.1	Rv0451c	RVBD_0451c			membrane protein MmpS4
gi|561108321|ref|NC_018143.2|	542144	542855	+	RVBD_0452	746	1108	0	0		YP_006513778.1	Rv0452	RVBD_0452			transcriptional regulator
gi|561108321|ref|NC_018143.2|	543176	544733	+	RVBD_0453	2130	2022	3	3		YP_006513779.1	Rv0453	RVBD_0453			PPE family protein PPE11
gi|561108321|ref|NC_018143.2|	544837	545188	+	RVBD_0454	56	43	0	0		YP_006513780.1	Rv0454	RVBD_0454			hypothetical protein
gi|561108321|ref|NC_018143.2|	545377	545824	-	RVBD_0455c	6	12	0	0		YP_006513782.1	Rv0455c	RVBD_0455c			hypothetical protein
gi|561108321|ref|NC_018143.2|	547078	547360	-	RVBD_0456A	643	709	1	0		YP_006513784.1	Rv0456A	RVBD_0456A			toxin MazF1
gi|561108321|ref|NC_018143.2|	547346	547520	-	RVBD_0456B	195	255	0	0		YP_006513785.1	Rv0456B	RVBD_0456B			antitoxin MazE1
gi|561108321|ref|NC_018143.2|	545891	546806	-	RVBD_0456c	1350	1558	1	0		YP_006513783.1	Rv0456c	RVBD_0456c			enoyl-CoA hydratase EchA2
gi|561108321|ref|NC_018143.2|	547588	549610	-	RVBD_0457c	1952	2481	11	8		YP_006513786.1	Rv0457c	RVBD_0457c			prolyl oligopeptidase
gi|561108321|ref|NC_018143.2|	549677	551201	+	RVBD_0458	308	481	10	3		YP_006513787.1	Rv0458	RVBD_0458			aldehyde dehydrogenase (NAD+)
gi|561108321|ref|NC_018143.2|	551200	551692	+	RVBD_0459	34	33	0	0		YP_006513788.1	Rv0459	RVBD_0459			hypothetical protein
gi|561108321|ref|NC_018143.2|	551751	551991	+	RVBD_0460	19	20	0	0		YP_006513789.1	Rv0460	RVBD_0460			hydrophobic protein
gi|561108321|ref|NC_018143.2|	552028	552553	+	RVBD_0461	2471	3823	11	11		YP_006513790.2	Rv0461	RVBD_0461			transmembrane protein
gi|561108321|ref|NC_018143.2|	552616	554011	+	RVBD_0462	1	10	1	0		YP_006513791.1	Rv0462	RVBD_0462			dihydrolipoamide dehydrogenase LpdC
gi|561108321|ref|NC_018143.2|	554018	554312	+	RVBD_0463	87	123	1	0		YP_006513792.1	Rv0463	RVBD_0463			membrane protein
gi|561108321|ref|NC_018143.2|	554315	554888	-	RVBD_0464c	389	728	4	0		YP_006513793.1	Rv0464c	RVBD_0464c			alkylhydroperoxidase AhpD family core domain-containing protein
gi|561108321|ref|NC_018143.2|	554884	556309	-	RVBD_0465c	1216	2719	17	22		YP_006513794.1	Rv0465c	RVBD_0465c			transcriptional regulator
gi|561108321|ref|NC_018143.2|	556460	557255	+	RVBD_0466	208	446	0	0		YP_006513795.1	Rv0466	RVBD_0466			hypothetical protein
gi|561108321|ref|NC_018143.2|	557529	558816	+	RVBD_0467	51	66	0	2		YP_006513796.1	Rv0467	RVBD_0467			isocitrate lyase Icl
gi|561108321|ref|NC_018143.2|	558897	559758	+	RVBD_0468	104	190	1	0		YP_006513797.1	Rv0468	RVBD_0468			3-hydroxybutyryl-CoA dehydrogenase FadB
gi|561108321|ref|NC_018143.2|	559890	560751	+	RVBD_0469	975	1487	1	1		YP_006513798.1	Rv0469	RVBD_0469			mycolic acid synthase UmaA
gi|561108321|ref|NC_018143.2|	561856	562297	-	RVBD_0470A	277	302	1	0		YP_006513800.1	Rv0470A	RVBD_0470A			mycolic acid synthase PcaA
gi|561108321|ref|NC_018143.2|	560850	561714	-	RVBD_0470c	88	239	3	4		YP_006513799.1	Rv0470c	RVBD_0470c			mycolic acid synthase PcaA
gi|561108321|ref|NC_018143.2|	562227	562716	-	RVBD_0471c	908	1108	7	9		YP_006513801.1	Rv0471c	RVBD_0471c			hypothetical protein
gi|561108321|ref|NC_018143.2|	562725	563430	-	RVBD_0472c	5546	7473	10	13		YP_006513802.1	Rv0472c	RVBD_0472c			transcriptional regulator TetR-family
gi|561108321|ref|NC_018143.2|	563566	564937	+	RVBD_0473	4725	5470	10	14		YP_006513803.1	Rv0473	RVBD_0473			transmembrane protein
gi|561108321|ref|NC_018143.2|	565023	565446	+	RVBD_0474	1516	1834	3	11		YP_006513804.1	Rv0474	RVBD_0474			transcriptional regulator
gi|561108321|ref|NC_018143.2|	565799	566399	+	RVBD_0475	89	209	4	2		YP_006513805.1	Rv0475	RVBD_0475			iron-regulated heparin binding hemagglutinin HbhA
gi|561108321|ref|NC_018143.2|	566510	566774	+	RVBD_0476	549	809	0	0		YP_006513806.1	Rv0476	RVBD_0476			transmembrane protein
gi|561108321|ref|NC_018143.2|	566778	567225	+	RVBD_0477	209	404	12	12		YP_006513807.1	Rv0477	RVBD_0477			secreted protein
gi|561108321|ref|NC_018143.2|	567224	567899	+	RVBD_0478	59	35	1	2		YP_006513808.1	Rv0478	RVBD_0478			deoxyribose-phosphate aldolase DeoC
gi|561108321|ref|NC_018143.2|	567923	568970	-	RVBD_0479c	11	9	0	0		YP_006513809.1	Rv0479c	RVBD_0479c			membrane protein
gi|561108321|ref|NC_018143.2|	568966	569809	-	RVBD_0480c	1869	1518	2	3		YP_006513810.1	Rv0480c	RVBD_0480c			hydrolase
gi|561108321|ref|NC_018143.2|	569990	570515	-	RVBD_0481c	164	209	9	6		YP_006513811.1	Rv0481c	RVBD_0481c			hypothetical protein
gi|561108321|ref|NC_018143.2|	570541	571651	+	RVBD_0482	103	122	5	9		YP_006513812.1	Rv0482	RVBD_0482			UDP-N-acetylenolpyruvoylglucosamine reductase MurB
gi|561108321|ref|NC_018143.2|	571712	573068	+	RVBD_0483	5911	5895	8	4		YP_006513813.1	Rv0483	RVBD_0483			lipoprotein LprQ
gi|561108321|ref|NC_018143.2|	573048	573804	-	RVBD_0484c	2490	2343	7	7		YP_006513814.1	Rv0484c	RVBD_0484c			oxidoreductase
gi|561108321|ref|NC_018143.2|	573986	575303	+	RVBD_0485	1228	1113	3	1		YP_006513815.1	Rv0485	RVBD_0485			transcriptional regulator
gi|561108321|ref|NC_018143.2|	575350	576793	+	RVBD_0486	0	0	0	0		YP_006513816.1	Rv0486	RVBD_0486			glycosyltransferase MshA
gi|561108321|ref|NC_018143.2|	576789	577341	+	RVBD_0487	730	818	18	23		YP_006513817.1	Rv0487	RVBD_0487			hypothetical protein
gi|561108321|ref|NC_018143.2|	577666	578272	+	RVBD_0488	1229	1467	0	1		YP_006513818.1	Rv0488	RVBD_0488			l-lysine exporter
gi|561108321|ref|NC_018143.2|	578428	579178	+	RVBD_0489	0	3	0	1		YP_006513819.1	Rv0489	RVBD_0489			phosphoglycerate mutase Gpm1
gi|561108321|ref|NC_018143.2|	579351	580584	+	RVBD_0490	151	180	0	0		YP_006513820.1	Rv0490	RVBD_0490			two-component system sensor histidine kinase SenX3
gi|561108321|ref|NC_018143.2|	580811	581495	+	RVBD_0491	1123	1031	1	0		YP_006513821.1	Rv0491	RVBD_0491			two-component system sensory transduction protein RegX3
gi|561108321|ref|NC_018143.2|	583377	583707	-	RVBD_0492A	72	66	0	0		YP_006513823.1	Rv0492A	RVBD_0492A			hypothetical protein
gi|561108321|ref|NC_018143.2|	581491	583381	-	RVBD_0492c	794	723	0	3		YP_006513822.1	Rv0492c	RVBD_0492c			oxidoreductase
gi|561108321|ref|NC_018143.2|	583703	584693	-	RVBD_0493c	2951	2280	5	2		YP_006513824.1	Rv0493c	RVBD_0493c			hypothetical protein
gi|561108321|ref|NC_018143.2|	584697	585426	+	RVBD_0494	182	151	4	3		YP_006513825.1	Rv0494	RVBD_0494			transcriptional regulator GntR-family
gi|561108321|ref|NC_018143.2|	585426	586317	-	RVBD_0495c	101	94	1	0		YP_006513826.1	Rv0495c	RVBD_0495c			hypothetical protein
gi|561108321|ref|NC_018143.2|	586396	587383	+	RVBD_0496	99	82	0	0		YP_006513827.2	Rv0496	RVBD_0496			exopolyphosphatase
gi|561108321|ref|NC_018143.2|	587379	588312	+	RVBD_0497	4952	5764	4	3		YP_006513828.1	Rv0497	RVBD_0497			transmembrane protein
gi|561108321|ref|NC_018143.2|	588327	589170	+	RVBD_0498	452	354	6	14		YP_006513829.1	Rv0498	RVBD_0498			hypothetical protein
gi|561108321|ref|NC_018143.2|	589185	590061	+	RVBD_0499	949	833	6	7		YP_006513830.1	Rv0499	RVBD_0499			hypothetical protein
gi|561108321|ref|NC_018143.2|	590085	590973	+	RVBD_0500	0	0	0	0		YP_006513831.1	Rv0500	RVBD_0500			pyrroline-5-carboxylate reductase ProC
gi|561108321|ref|NC_018143.2|	591113	591350	+	RVBD_0500A	56	65	0	0		YP_006513832.1	Rv0500A	RVBD_0500A			excisionase
gi|561108321|ref|NC_018143.2|	591477	591579	+	RVBD_0500B	779	1140	1	1		YP_006513833.1	Rv0500B	RVBD_0500B			hypothetical protein
gi|561108321|ref|NC_018143.2|	591656	592787	+	RVBD_0501	1270	1643	5	2		YP_006513834.1	Rv0501	RVBD_0501			UDP-glucose 4-epimerase GalE2
gi|561108321|ref|NC_018143.2|	592793	593870	+	RVBD_0502	933	1144	6	4		YP_006513835.1	Rv0502	RVBD_0502			hypothetical protein
gi|561108321|ref|NC_018143.2|	593873	594782	-	RVBD_0503c	1792	2430	2	0		YP_006513836.1	Rv0503c	RVBD_0503c			cyclopropane mycolic acid synthase 2 CmaA2
gi|561108321|ref|NC_018143.2|	594804	595305	-	RVBD_0504c	44	69	0	0		YP_006513837.1	Rv0504c	RVBD_0504c			hypothetical protein
gi|561108321|ref|NC_018143.2|	595466	596588	-	RVBD_0505c	35	100	0	0		YP_006513838.1	Rv0505c	RVBD_0505c			phosphoserine phosphatase SerB1
gi|561108321|ref|NC_018143.2|	596761	597205	+	RVBD_0506	182	177	2	2		YP_006513839.1	Rv0506	RVBD_0506			membrane protein MmpS2
gi|561108321|ref|NC_018143.2|	597201	600108	+	RVBD_0507	2573	3000	14	15		YP_006513840.1	Rv0507	RVBD_0507			transmembrane transporter MmpL2
gi|561108321|ref|NC_018143.2|	600100	600394	+	RVBD_0508	136	235	13	9		YP_006513841.1	Rv0508	RVBD_0508			hypothetical protein
gi|561108321|ref|NC_018143.2|	600443	601850	+	RVBD_0509	20	15	0	0		YP_006513842.1	Rv0509	RVBD_0509			glutamyl-tRNA reductase HemA
gi|561108321|ref|NC_018143.2|	601859	602789	+	RVBD_0510	0	0	0	1		YP_006513843.1	Rv0510	RVBD_0510			porphobilinogen deaminase HemC
gi|561108321|ref|NC_018143.2|	602821	604519	+	RVBD_0511	4	0	0	0		YP_006513844.1	Rv0511	RVBD_0511			uroporphyrin-III C-methyltransferase HemD
gi|561108321|ref|NC_018143.2|	604604	605594	+	RVBD_0512	98	91	0	0		YP_006513845.1	Rv0512	RVBD_0512			delta-aminolevulinic acid dehydratase HemB
gi|561108321|ref|NC_018143.2|	605606	606155	+	RVBD_0513	487	486	1	0		YP_006513846.1	Rv0513	RVBD_0513			transmembrane protein
gi|561108321|ref|NC_018143.2|	606151	606451	+	RVBD_0514	104	67	1	0		YP_006513847.1	Rv0514	RVBD_0514			transmembrane protein
gi|561108321|ref|NC_018143.2|	606553	608065	+	RVBD_0515	5126	4263	24	4		YP_006513848.1	Rv0515	RVBD_0515			13E12 repeat family protein
gi|561108321|ref|NC_018143.2|	608061	608538	-	RVBD_0516c	151	177	1	0		YP_006513849.1	Rv0516c	RVBD_0516c			anti-anti-sigma factor
gi|561108321|ref|NC_018143.2|	608748	610059	+	RVBD_0517	1511	1386	6	8		YP_006513850.1	Rv0517	RVBD_0517			membrane acyltransferase
gi|561108321|ref|NC_018143.2|	610190	610886	+	RVBD_0518	1030	1056	1	0		YP_006513851.1	Rv0518	RVBD_0518			exported protein
gi|561108321|ref|NC_018143.2|	611174	612077	-	RVBD_0519c	593	509	2	3		YP_006513852.1	Rv0519c	RVBD_0519c			mycolyltransferase II
gi|561108321|ref|NC_018143.2|	612257	612608	+	RVBD_0520	265	251	0	1		YP_006513853.1	Rv0520	RVBD_0520			methyltransferase
gi|561108321|ref|NC_018143.2|	612600	612906	+	RVBD_0521	111	107	0	0		YP_006513854.1	Rv0521	RVBD_0521			methyltransferase
gi|561108321|ref|NC_018143.2|	613040	614345	+	RVBD_0522	499	452	1	1		YP_006513855.1	Rv0522	RVBD_0522			GABA permease GabP
gi|561108321|ref|NC_018143.2|	614328	614724	-	RVBD_0523c	99	99	0	0		YP_006513856.1	Rv0523c	RVBD_0523c			deazaflavin-dependent nitroreductase
gi|561108321|ref|NC_018143.2|	614837	616226	+	RVBD_0524	2	13	2	2		YP_006513857.1	Rv0524	RVBD_0524			glutamate-1-semialdehyde 2
gi|561108321|ref|NC_018143.2|	616225	616834	+	RVBD_0525	23	36	2	1		YP_006513858.1	Rv0525	RVBD_0525			phosphoglycerate mutase
gi|561108321|ref|NC_018143.2|	616848	617499	+	RVBD_0526	13	19	2	1		YP_006513859.1	Rv0526	RVBD_0526			thioredoxin
gi|561108321|ref|NC_018143.2|	617495	618275	+	RVBD_0527	0	0	0	1		YP_006513860.1	Rv0527	RVBD_0527			cytochrome C-type biogenesis protein CcdA
gi|561108321|ref|NC_018143.2|	618307	619897	+	RVBD_0528	0	0	0	0		YP_006513861.1	Rv0528	RVBD_0528			cytochrome C biogenesis protein
gi|561108321|ref|NC_018143.2|	619893	620868	+	RVBD_0529	0	0	0	0		YP_006513862.1	Rv0529	RVBD_0529			cytochrome C-type biogenesis protein CcsA
gi|561108321|ref|NC_018143.2|	620909	622127	+	RVBD_0530	572	397	1	2		YP_006513863.1	Rv0530	RVBD_0530			hypothetical protein
gi|561108321|ref|NC_018143.2|	622123	622285	-	RVBD_0530Ac	97	92	0	0		YP_008855182.1	Rv0530Ac	RVBD_0530Ac			hypothetical protein
gi|561108321|ref|NC_018143.2|	622331	622649	+	RVBD_0531	5	20	0	0		YP_006513864.1	Rv0531	RVBD_0531			membrane protein
gi|561108321|ref|NC_018143.2|	622795	624580	+	RVBD_0532	1162	598	7	2		YP_006513865.1	Rv0532	RVBD_0532			PE-PGRS family protein PE_PGRS6
gi|561108321|ref|NC_018143.2|	624475	625483	-	RVBD_0533c	869	568	2	2		YP_006513866.1	Rv0533c	RVBD_0533c			3-oxoacyl-[acyl-carrier-protein] synthase 3 FabH
gi|561108321|ref|NC_018143.2|	625564	626443	-	RVBD_0534c	809	483	1	1		YP_006513867.1	Rv0534c	RVBD_0534c			1
gi|561108321|ref|NC_018143.2|	626459	627254	+	RVBD_0535	1797	1206	5	5		YP_006513868.1	Rv0535	RVBD_0535			5'-methylthioadenosine phosphorylase Pnp
gi|561108321|ref|NC_018143.2|	627250	628291	+	RVBD_0536	148	97	1	0		YP_006513869.1	Rv0536	RVBD_0536			UDP-glucose 4-epimerase GalE3
gi|561108321|ref|NC_018143.2|	628300	629734	-	RVBD_0537c	1169	859	1	1		YP_006513870.1	Rv0537c	RVBD_0537c			membrane protein
gi|561108321|ref|NC_018143.2|	630042	631689	+	RVBD_0538	140	115	0	0		YP_006513871.1	Rv0538	RVBD_0538			membrane protein
gi|561108321|ref|NC_018143.2|	631745	632378	+	RVBD_0539	13	11	0	0		YP_006513872.2	Rv0539	RVBD_0539			glycosyltransferase
gi|561108321|ref|NC_018143.2|	632374	633037	+	RVBD_0540	199	153	0	0		YP_006513873.1	Rv0540	RVBD_0540			hypothetical protein
gi|561108321|ref|NC_018143.2|	633057	634407	-	RVBD_0541c	0	4	0	0		YP_006513874.1	Rv0541c	RVBD_0541c			integral membrane protein
gi|561108321|ref|NC_018143.2|	634418	635507	-	RVBD_0542c	1	4	0	0		YP_006513875.1	Rv0542c	RVBD_0542c			O-succinylbenzoic acid-CoA ligase MenE
gi|561108321|ref|NC_018143.2|	635575	635878	-	RVBD_0543c	465	570	0	0		YP_006513876.1	Rv0543c	RVBD_0543c			hypothetical protein
gi|561108321|ref|NC_018143.2|	635937	636216	-	RVBD_0544c	70	42	3	12		YP_006513877.1	Rv0544c	RVBD_0544c			transmembrane protein
gi|561108321|ref|NC_018143.2|	636212	637466	-	RVBD_0545c	1170	1110	3	2		YP_006513878.1	Rv0545c	RVBD_0545c			inorganic phosphate transporter integral membrane protein PitA
gi|561108321|ref|NC_018143.2|	637585	637972	-	RVBD_0546c	3044	2621	6	4		YP_006513879.1	Rv0546c	RVBD_0546c			lactoylglutathione lyase
gi|561108321|ref|NC_018143.2|	638034	638919	-	RVBD_0547c	3485	2772	10	11		YP_006513880.1	Rv0547c	RVBD_0547c			oxidoreductase
gi|561108321|ref|NC_018143.2|	639014	639959	-	RVBD_0548c	322	302	0	2		YP_006513881.1	Rv0548c	RVBD_0548c			1
gi|561108321|ref|NC_018143.2|	640230	640644	-	RVBD_0549c	56	58	0	1		YP_006513882.1	Rv0549c	RVBD_0549c			toxin VapC3
gi|561108321|ref|NC_018143.2|	640640	640907	-	RVBD_0550c	5	9	0	0		YP_006513883.1	Rv0550c	RVBD_0550c			antitoxin VapB3
gi|561108321|ref|NC_018143.2|	641098	642814	-	RVBD_0551c	647	670	7	6		YP_006513884.1	Rv0551c	RVBD_0551c			fatty-acid-CoA ligase FadD8
gi|561108321|ref|NC_018143.2|	642891	644496	+	RVBD_0552	260	207	3	0		YP_006513885.1	Rv0552	RVBD_0552			hypothetical protein
gi|561108321|ref|NC_018143.2|	644492	645473	+	RVBD_0553	36	22	0	0		YP_006513886.1	Rv0553	RVBD_0553			muconate cycloisomerase MenC
gi|561108321|ref|NC_018143.2|	645469	646258	+	RVBD_0554	203	155	0	0		YP_006513887.1	Rv0554	RVBD_0554			peroxidase BpoC
gi|561108321|ref|NC_018143.2|	646300	647965	+	RVBD_0555	0	0	0	0		YP_006513888.1	Rv0555	RVBD_0555			bifunctional menaquinone biosynthesis protein MenD
gi|561108321|ref|NC_018143.2|	647961	648477	+	RVBD_0556	0	0	0	0		YP_006513889.1	Rv0556	RVBD_0556			transmembrane protein
gi|561108321|ref|NC_018143.2|	648538	649675	+	RVBD_0557	18	23	0	0		YP_006513890.1	Rv0557	RVBD_0557			mannosyltransferase MgtA
gi|561108321|ref|NC_018143.2|	649691	650396	+	RVBD_0558	17	28	0	0		YP_006513891.1	Rv0558	RVBD_0558			ubiquinone/menaquinone biosynthesis methyltransferase MenH
gi|561108321|ref|NC_018143.2|	650409	650748	-	RVBD_0559c	637	605	1	5		YP_006513892.1	Rv0559c	RVBD_0559c			secreted protein
gi|561108321|ref|NC_018143.2|	650781	651507	-	RVBD_0560c	80	100	1	1		YP_006513893.1	Rv0560c	RVBD_0560c			benzoquinone methyltransferase
gi|561108321|ref|NC_018143.2|	651531	652758	-	RVBD_0561c	85	72	0	0		YP_006513894.1	Rv0561c	RVBD_0561c			oxidoreductase
gi|561108321|ref|NC_018143.2|	652773	653781	+	RVBD_0562	18	28	2	2		YP_006513895.1	Rv0562	RVBD_0562			polyprenyl-diphosphate synthase GrcC1
gi|561108321|ref|NC_018143.2|	653881	654742	+	RVBD_0563	24	30	0	0		YP_006513896.1	Rv0563	RVBD_0563			protease transmembrane protein heat shock protein HtpX
gi|561108321|ref|NC_018143.2|	654926	655952	-	RVBD_0564c	175	204	1	7		YP_006513897.1	Rv0564c	RVBD_0564c			glycerol-3-phosphate dehydrogenase GpdA1
gi|561108321|ref|NC_018143.2|	656012	657473	-	RVBD_0565c	473	682	4	1		YP_006513898.1	Rv0565c	RVBD_0565c			monooxygenase
gi|561108321|ref|NC_018143.2|	657550	658042	-	RVBD_0566c	55	85	0	0		YP_006513899.1	Rv0566c	RVBD_0566c			hypothetical protein
gi|561108321|ref|NC_018143.2|	658323	659343	+	RVBD_0567	565	749	12	17		YP_006513900.1	Rv0567	RVBD_0567			methyltransferase
gi|561108321|ref|NC_018143.2|	659452	660871	+	RVBD_0568	2699	2396	3	2		YP_006513901.1	Rv0568	RVBD_0568			cytochrome P450 135B1 Cyp135B1
gi|561108321|ref|NC_018143.2|	661005	661272	+	RVBD_0569	55	42	0	0		YP_006513902.1	Rv0569	RVBD_0569			hypothetical protein
gi|561108321|ref|NC_018143.2|	661297	663376	+	RVBD_0570	315	306	3	4		YP_006513903.1	Rv0570	RVBD_0570			ribonucleoside-diphosphate reductase NrdZ
gi|561108321|ref|NC_018143.2|	663489	664821	-	RVBD_0571c	54	55	0	1		YP_006513904.1	Rv0571c	RVBD_0571c			hypothetical protein
gi|561108321|ref|NC_018143.2|	665044	665386	-	RVBD_0572c	1157	973	5	4		YP_006513906.1	Rv0572c	RVBD_0572c			hypothetical protein
gi|561108321|ref|NC_018143.2|	665853	667245	-	RVBD_0573c	313	295	2	0		YP_006513907.1	Rv0573c	RVBD_0573c			nicotinate phosphoribosyltransferase PncB2
gi|561108321|ref|NC_018143.2|	667254	668397	-	RVBD_0574c	341	342	5	4		YP_006513908.1	Rv0574c	RVBD_0574c			poly-gamma-glutamate synthesis protein (capsule biosynthesis protein)
gi|561108321|ref|NC_018143.2|	668581	669748	-	RVBD_0575c	454	477	1	0		YP_006513909.1	Rv0575c	RVBD_0575c			oxidoreductase
gi|561108321|ref|NC_018143.2|	669850	671155	+	RVBD_0576	194	176	4	4		YP_006513910.1	Rv0576	RVBD_0576			transcriptional regulator ArsR-family
gi|561108321|ref|NC_018143.2|	671168	671954	+	RVBD_0577	355	182	0	0		YP_006513911.1	Rv0577	RVBD_0577			antigen Cfp30B
gi|561108321|ref|NC_018143.2|	671998	675919	-	RVBD_0578c	234	169	3	6		YP_006513912.1	Rv0578c	RVBD_0578c			PE-PGRS family protein PE_PGRS7
gi|561108321|ref|NC_018143.2|	676240	676999	+	RVBD_0579	1728	1483	9	9		YP_006513913.1	Rv0579	RVBD_0579			hypothetical protein
gi|561108321|ref|NC_018143.2|	677127	677619	-	RVBD_0580c	170	202	0	1		YP_006513914.1	Rv0580c	RVBD_0580c			hypothetical protein
gi|561108321|ref|NC_018143.2|	677712	677928	+	RVBD_0581	975	1081	2	1		YP_006513915.1	Rv0581	RVBD_0581			antitoxin VapB26
gi|561108321|ref|NC_018143.2|	677924	678332	+	RVBD_0582	36	42	0	0		YP_006513916.1	Rv0582	RVBD_0582			toxin VapC26
gi|561108321|ref|NC_018143.2|	678391	679078	-	RVBD_0583c	2091	2271	14	15		YP_006513917.1	Rv0583c	RVBD_0583c			lipoprotein LpqN
gi|561108321|ref|NC_018143.2|	679231	681865	+	RVBD_0584	1270	1451	12	7		YP_006513918.1	Rv0584	RVBD_0584			exported protein
gi|561108321|ref|NC_018143.2|	681887	684275	-	RVBD_0585c	1058	1110	1	0		YP_006513919.1	Rv0585c	RVBD_0585c			integral membrane protein
gi|561108321|ref|NC_018143.2|	684412	685135	+	RVBD_0586	35	19	0	0		YP_006513920.1	Rv0586	RVBD_0586			transcriptional regulator Mce2R
gi|561108321|ref|NC_018143.2|	685131	685929	+	RVBD_0587	81	114	2	1		YP_006513921.1	Rv0587	RVBD_0587			ABC transporter permease YrbE2A
gi|561108321|ref|NC_018143.2|	685930	686818	+	RVBD_0588	12	31	1	1		YP_006513922.1	Rv0588	RVBD_0588			ABC transporter permease YrbE2B
gi|561108321|ref|NC_018143.2|	686823	688038	+	RVBD_0589	786	873	0	0		YP_006513923.1	Rv0589	RVBD_0589			MCE-family protein Mce2A
gi|561108321|ref|NC_018143.2|	688034	688862	+	RVBD_0590	988	1083	2	1		YP_006513924.1	Rv0590	RVBD_0590			MCE-family protein Mce2B
gi|561108321|ref|NC_018143.2|	688810	689065	+	RVBD_0590A	162	157	0	0		YP_006513925.1	Rv0590A	RVBD_0590A			ABC transporter substrate-binding protein
gi|561108321|ref|NC_018143.2|	689061	690507	+	RVBD_0591	158	252	2	1		YP_006513926.1	Rv0591	RVBD_0591			MCE-family protein Mce2C
gi|561108321|ref|NC_018143.2|	690503	692030	+	RVBD_0592	204	223	0	0		YP_006513927.1	Rv0592	RVBD_0592			MCE-family protein Mce2D
gi|561108321|ref|NC_018143.2|	692026	693235	+	RVBD_0593	30	27	0	1		YP_006513928.1	Rv0593	RVBD_0593			MCE-family lipoprotein LprL
gi|561108321|ref|NC_018143.2|	693239	694790	+	RVBD_0594	1685	1995	10	10		YP_006513929.1	Rv0594	RVBD_0594			MCE-family protein Mce2F
gi|561108321|ref|NC_018143.2|	694841	695234	-	RVBD_0595c	317	342	2	2		YP_006513930.1	Rv0595c	RVBD_0595c			toxin VapC4
gi|561108321|ref|NC_018143.2|	695230	695488	-	RVBD_0596c	9	7	0	0		YP_006513931.1	Rv0596c	RVBD_0596c			antitoxin VapB4
gi|561108321|ref|NC_018143.2|	695670	696906	-	RVBD_0597c	360	605	2	3		YP_006513932.1	Rv0597c	RVBD_0597c			ATPase
gi|561108321|ref|NC_018143.2|	697156	697570	-	RVBD_0598c	288	254	1	0		YP_006513934.1	Rv0598c	RVBD_0598c			toxin VapC27
gi|561108321|ref|NC_018143.2|	697566	697803	-	RVBD_0599c	0	1	0	0		YP_006513935.1	Rv0599c	RVBD_0599c			antitoxin VapB27
gi|561108321|ref|NC_018143.2|	697906	698413	-	RVBD_0600c	175	191	0	0		YP_006513936.1	Rv0600c	RVBD_0600c			two-component system sensor histidine kinase
gi|561108321|ref|NC_018143.2|	698526	698997	-	RVBD_0601c	126	77	0	0		YP_006513937.1	Rv0601c	RVBD_0601c			two-component system sensor histidine kinase
gi|561108321|ref|NC_018143.2|	699040	699802	-	RVBD_0602c	151	99	2	0		YP_006513938.1	Rv0602c	RVBD_0602c			two-component system transcriptional regulator TcrA
gi|561108321|ref|NC_018143.2|	699858	700170	+	RVBD_0603	69	45	0	0		YP_006513939.1	Rv0603	RVBD_0603			exported protein
gi|561108321|ref|NC_018143.2|	700241	701192	+	RVBD_0604	116	107	0	0		YP_006513940.1	Rv0604	RVBD_0604			lipoprotein LpqO
gi|561108321|ref|NC_018143.2|	701408	702017	+	RVBD_0605	83	70	1	0		YP_006513941.1	Rv0605	RVBD_0605			resolvase
gi|561108321|ref|NC_018143.2|	702018	702762	+	RVBD_0606	808	733	4	6		YP_006513942.1	Rv0606	RVBD_0606			transposase
gi|561108321|ref|NC_018143.2|	702815	703202	+	RVBD_0607	0	0	0	0		YP_006513943.1	Rv0607	RVBD_0607			hypothetical protein
gi|561108321|ref|NC_018143.2|	703246	703492	+	RVBD_0608	2	0	0	0		YP_006513944.1	Rv0608	RVBD_0608			antitoxin VapB28
gi|561108321|ref|NC_018143.2|	703488	703890	+	RVBD_0609	13	23	0	0		YP_006513945.1	Rv0609	RVBD_0609			toxin VapC28
gi|561108321|ref|NC_018143.2|	703832	704060	+	RVBD_0609A	0	0	0	0		YP_006513946.1	Rv0609A	RVBD_0609A			hypothetical protein
gi|561108321|ref|NC_018143.2|	704754	705912	-	RVBD_0610c	204	128	1	0		YP_006513948.1	Rv0610c	RVBD_0610c			hypothetical protein
gi|561108321|ref|NC_018143.2|	705963	706347	-	RVBD_0611c	374	236	1	1		YP_006513949.1	Rv0611c	RVBD_0611c			hypothetical protein
gi|561108321|ref|NC_018143.2|	706326	706932	+	RVBD_0612	78	47	0	0		YP_006513950.1	Rv0612	RVBD_0612			hypothetical protein
gi|561108321|ref|NC_018143.2|	706950	709518	-	RVBD_0613c	540	370	7	9		YP_006513951.1	Rv0613c	RVBD_0613c			hypothetical protein
gi|561108321|ref|NC_018143.2|	709358	710351	+	RVBD_0614	296	211	7	6		YP_006513952.1	Rv0614	RVBD_0614			galactose-1-phosphate uridylyltransferase
gi|561108321|ref|NC_018143.2|	710347	710590	+	RVBD_0615	112	96	0	1		YP_006513953.1	Rv0615	RVBD_0615			membrane protein
gi|561108321|ref|NC_018143.2|	710784	711012	+	RVBD_0616A	6	1	0	0		YP_006513955.1	Rv0616A	RVBD_0616A			antitoxin VapB29
gi|561108321|ref|NC_018143.2|	710586	710853	-	RVBD_0616c	192	181	0	1		YP_006513954.1	Rv0616c	RVBD_0616c			hypothetical protein
gi|561108321|ref|NC_018143.2|	711008	711410	+	RVBD_0617	847	650	0	0		YP_006513956.1	Rv0617	RVBD_0617			toxin VapC29
gi|561108321|ref|NC_018143.2|	711538	712234	+	RVBD_0618	36	17	0	0		YP_006513957.1	Rv0618	RVBD_0618			galactose-1-phosphate uridylyltransferase GalTa
gi|561108321|ref|NC_018143.2|	712251	712722	+	RVBD_0619	2	5	0	0		YP_006513958.1	Rv0619	RVBD_0619			galactose-1-phosphate uridylyltransferase GalTb
gi|561108321|ref|NC_018143.2|	712718	713810	+	RVBD_0620	40	21	0	0		YP_006513959.1	Rv0620	RVBD_0620			galactokinase GalK
gi|561108321|ref|NC_018143.2|	714204	715269	+	RVBD_0621	148	87	0	0		YP_006513960.1	Rv0621	RVBD_0621			membrane protein
gi|561108321|ref|NC_018143.2|	715372	716320	+	RVBD_0622	521	377	0	0		YP_006513961.1	Rv0622	RVBD_0622			membrane protein
gi|561108321|ref|NC_018143.2|	716412	716667	+	RVBD_0623	102	152	0	0		YP_006513962.1	Rv0623	RVBD_0623			antitoxin VapB30
gi|561108321|ref|NC_018143.2|	716666	717062	+	RVBD_0624	113	104	0	0		YP_006513963.1	Rv0624	RVBD_0624			toxin VapC30
gi|561108321|ref|NC_018143.2|	717155	717896	-	RVBD_0625c	218	150	0	2		YP_006513964.1	Rv0625c	RVBD_0625c			TVP38/TMEM64 family membrane protein
gi|561108321|ref|NC_018143.2|	718027	718288	+	RVBD_0626	41	30	0	1		YP_006513965.1	Rv0626	RVBD_0626			antitoxin VapB5
gi|561108321|ref|NC_018143.2|	718284	718692	+	RVBD_0627	0	0	0	0		YP_006513966.1	Rv0627	RVBD_0627			toxin VapC5
gi|561108321|ref|NC_018143.2|	718763	719915	-	RVBD_0628c	64	46	0	1		YP_006513967.1	Rv0628c	RVBD_0628c			hypothetical protein
gi|561108321|ref|NC_018143.2|	720007	721735	-	RVBD_0629c	127	88	0	0		YP_006513968.1	Rv0629c	RVBD_0629c			exonuclease V alpha chain RecD
gi|561108321|ref|NC_018143.2|	721731	725016	-	RVBD_0630c	863	553	1	1		YP_006513969.1	Rv0630c	RVBD_0630c			exonuclease V beta chain RecB
gi|561108321|ref|NC_018143.2|	725015	728309	-	RVBD_0631c	217	185	0	2		YP_006513970.1	Rv0631c	RVBD_0631c			exonuclease V gamma chain RecC
gi|561108321|ref|NC_018143.2|	728585	729281	-	RVBD_0632c	718	767	26	27		YP_006513971.1	Rv0632c	RVBD_0632c			enoyl-CoA hydratase EchA3
gi|561108321|ref|NC_018143.2|	729329	730169	-	RVBD_0633c	1097	1207	7	2		YP_006513972.1	Rv0633c	RVBD_0633c			exported protein
gi|561108321|ref|NC_018143.2|	731115	731367	+	RVBD_0634A	13	71	0	0		YP_006513974.1	Rv0634A	RVBD_0634A			hypothetical protein
gi|561108321|ref|NC_018143.2|	731714	731882	+	RVBD_0634B	0	7	0	0		YP_006513975.1	Rv0634B	RVBD_0634B			50S ribosomal protein L33 RpmG2
gi|561108321|ref|NC_018143.2|	730322	731036	-	RVBD_0634c	369	518	2	3		YP_006513973.1	Rv0634c	RVBD_0634c			hydroxyacylglutathione hydrolase
gi|561108321|ref|NC_018143.2|	731932	732409	+	RVBD_0635	10	5	0	1		YP_006513976.1	Rv0635	RVBD_0635			(3R)-hydroxyacyl-ACP dehydratase subunit HadA
gi|561108321|ref|NC_018143.2|	732395	732824	+	RVBD_0636	0	2	0	0		YP_006513977.1	Rv0636	RVBD_0636			(3R)-hydroxyacyl-ACP dehydratase subunit HadB
gi|561108321|ref|NC_018143.2|	732827	733328	+	RVBD_0637	19	43	4	2		YP_006513978.1	Rv0637	RVBD_0637			(3R)-hydroxyacyl-ACP dehydratase subunit HadC
gi|561108321|ref|NC_018143.2|	733739	734225	+	RVBD_0638	41	61	2	0		YP_006513979.1	Rv0638	RVBD_0638			preprotein translocase subunit SecE1
gi|561108321|ref|NC_018143.2|	734256	734973	+	RVBD_0639	1	0	0	0		YP_006513980.1	Rv0639	RVBD_0639			transcription antitermination protein NusG
gi|561108321|ref|NC_018143.2|	735024	735453	+	RVBD_0640	0	5	0	0		YP_006513981.1	Rv0640	RVBD_0640			50S ribosomal protein L11 RplK
gi|561108321|ref|NC_018143.2|	735519	736227	+	RVBD_0641	135	174	3	3		YP_006513982.1	Rv0641	RVBD_0641			50S ribosomal protein L1 RplA
gi|561108321|ref|NC_018143.2|	736300	737206	-	RVBD_0642c	37	68	1	2		YP_006513983.1	Rv0642c	RVBD_0642c			methoxy mycolic acid synthase 4 MmaA4
gi|561108321|ref|NC_018143.2|	737270	738152	-	RVBD_0643c	380	665	1	0		YP_006513984.1	Rv0643c	RVBD_0643c			methoxy mycolic acid synthase 3 MmaA3
gi|561108321|ref|NC_018143.2|	738299	739163	-	RVBD_0644c	306	367	1	2		YP_006513985.1	Rv0644c	RVBD_0644c			methoxy mycolic acid synthase 2 MmaA2
gi|561108321|ref|NC_018143.2|	739329	740190	-	RVBD_0645c	679	809	4	3		YP_006513986.1	Rv0645c	RVBD_0645c			methoxy mycolic acid synthase 1 MmaA1
gi|561108321|ref|NC_018143.2|	740236	741142	-	RVBD_0646c	357	377	4	6		YP_006513987.1	Rv0646c	RVBD_0646c			lipase/esterase LipG
gi|561108321|ref|NC_018143.2|	741153	742620	-	RVBD_0647c	36	51	0	1		YP_006513988.1	Rv0647c	RVBD_0647c			hypothetical protein
gi|561108321|ref|NC_018143.2|	742721	746369	+	RVBD_0648	650	550	4	6		YP_006513989.1	Rv0648	RVBD_0648			alpha-mannosidase
gi|561108321|ref|NC_018143.2|	746365	747040	+	RVBD_0649	92	64	0	0		YP_006513990.1	Rv0649	RVBD_0649			malonyl CoA-acyl carrier protein transacylase FabD2
gi|561108321|ref|NC_018143.2|	747039	747948	+	RVBD_0650	158	83	3	3		YP_006513991.1	Rv0650	RVBD_0650			glucokinase
gi|561108321|ref|NC_018143.2|	748278	748815	+	RVBD_0651	0	0	0	0		YP_006513992.1	Rv0651	RVBD_0651			50S ribosomal protein L10 RplJ
gi|561108321|ref|NC_018143.2|	748851	749244	+	RVBD_0652	996	953	2	0		YP_006513993.1	Rv0652	RVBD_0652			50S ribosomal protein L7/L12 RplL
gi|561108321|ref|NC_018143.2|	749236	749932	-	RVBD_0653c	1040	994	3	1		YP_006513994.1	Rv0653c	RVBD_0653c			transcriptional regulator TetR-family
gi|561108321|ref|NC_018143.2|	750002	751508	+	RVBD_0654	2274	2213	30	29		YP_006513995.1	Rv0654	RVBD_0654			oxidoreductase
gi|561108321|ref|NC_018143.2|	751519	752599	+	RVBD_0655	2567	3309	30	42		YP_006513996.1	Rv0655	RVBD_0655			ribonucleotide-transport ABC transporter ATP-binding protein Mkl
gi|561108321|ref|NC_018143.2|	752986	753370	-	RVBD_0656c	4	7	0	0		YP_006513997.1	Rv0656c	RVBD_0656c			toxin VapC6
gi|561108321|ref|NC_018143.2|	753464	753620	-	RVBD_0657c	1196	1372	1	5		YP_006513998.1	Rv0657c	RVBD_0657c			antitoxin VapB6
gi|561108321|ref|NC_018143.2|	753695	754412	-	RVBD_0658c	1206	1143	4	0		YP_006513999.1	Rv0658c	RVBD_0658c			integral membrane protein
gi|561108321|ref|NC_018143.2|	754687	754996	-	RVBD_0659c	68	155	1	3		YP_006514000.1	Rv0659c	RVBD_0659c			toxin MazF2
gi|561108321|ref|NC_018143.2|	754982	755228	-	RVBD_0660c	82	100	0	1		YP_006514001.1	Rv0660c	RVBD_0660c			antitoxin MazE2
gi|561108321|ref|NC_018143.2|	755337	755775	-	RVBD_0661c	103	108	0	0		YP_006514002.1	Rv0661c	RVBD_0661c			toxin VapC7
gi|561108321|ref|NC_018143.2|	755771	756026	-	RVBD_0662c	36	46	0	0		YP_006514003.2	Rv0662c	RVBD_0662c			antitoxin VapB7
gi|561108321|ref|NC_018143.2|	756139	758503	+	RVBD_0663	2859	3187	8	11		YP_006514004.1	Rv0663	RVBD_0663			arylsulfatase AtsD
gi|561108321|ref|NC_018143.2|	758534	758807	+	RVBD_0664	72	97	0	0		YP_006514005.1	Rv0664	RVBD_0664			antitoxin VapB8
gi|561108321|ref|NC_018143.2|	758803	759142	+	RVBD_0665	15	18	0	0		YP_006514006.1	Rv0665	RVBD_0665			toxin VapC8
gi|561108321|ref|NC_018143.2|	759138	759312	+	RVBD_0666	0	7	0	0		YP_006514007.1	Rv0666	RVBD_0666			membrane protein
gi|561108321|ref|NC_018143.2|	759809	763328	+	RVBD_0667	0	1	0	0		YP_006514009.1	Rv0667	RVBD_0667			DNA-directed RNA polymerase RpoB
gi|561108321|ref|NC_018143.2|	763372	767323	+	RVBD_0668	225	278	0	1		YP_006514010.1	Rv0668	RVBD_0668			DNA-directed RNA polymerase RpoC
gi|561108321|ref|NC_018143.2|	767686	769600	-	RVBD_0669c	373	426	0	1		YP_006514012.1	Rv0669c	RVBD_0669c			hydrolase
gi|561108321|ref|NC_018143.2|	769794	770553	+	RVBD_0670	102	121	5	0		YP_006514013.1	Rv0670	RVBD_0670			endonuclease IV End
gi|561108321|ref|NC_018143.2|	770584	771427	+	RVBD_0671	187	158	3	2		YP_006514014.1	Rv0671	RVBD_0671			lipoprotein LpqP
gi|561108321|ref|NC_018143.2|	771486	773115	+	RVBD_0672	1873	2051	4	7		YP_006514015.1	Rv0672	RVBD_0672			acyl-CoA dehydrogenase FadE8
gi|561108321|ref|NC_018143.2|	773125	774064	+	RVBD_0673	159	142	1	1		YP_006514016.1	Rv0673	RVBD_0673			enoyl-CoA hydratase EchA4
gi|561108321|ref|NC_018143.2|	774066	774789	+	RVBD_0674	56	21	0	0		YP_006514017.1	Rv0674	RVBD_0674			phenylacetic acid degradation operon negative regulatory protein
gi|561108321|ref|NC_018143.2|	774785	775577	+	RVBD_0675	5	1	0	0		YP_006514018.1	Rv0675	RVBD_0675			enoyl-CoA hydratase EchA5
gi|561108321|ref|NC_018143.2|	775588	778483	-	RVBD_0676c	326	475	5	5		YP_006514019.1	Rv0676c	RVBD_0676c			transmembrane transporter MmpL5
gi|561108321|ref|NC_018143.2|	778479	778908	-	RVBD_0677c	14	29	1	0		YP_006514020.1	Rv0677c	RVBD_0677c			membrane protein MmpS5
gi|561108321|ref|NC_018143.2|	778992	779490	+	RVBD_0678	63	80	1	0		YP_006514021.1	Rv0678	RVBD_0678			hypothetical protein
gi|561108321|ref|NC_018143.2|	779545	780043	-	RVBD_0679c	357	523	0	1		YP_006514022.1	Rv0679c	RVBD_0679c			threonine rich protein
gi|561108321|ref|NC_018143.2|	780044	780419	-	RVBD_0680c	39	78	0	0		YP_006514023.1	Rv0680c	RVBD_0680c			transmembrane protein
gi|561108321|ref|NC_018143.2|	780723	781314	+	RVBD_0681	223	346	0	0		YP_006514024.1	Rv0681	RVBD_0681			transcriptional regulator TetR-family
gi|561108321|ref|NC_018143.2|	781562	781937	+	RVBD_0682	0	0	0	0		YP_006514025.1	Rv0682	RVBD_0682			30S ribosomal protein S12 RpsL
gi|561108321|ref|NC_018143.2|	781936	782407	+	RVBD_0683	0	0	0	0		YP_006514026.1	Rv0683	RVBD_0683			30S ribosomal protein S7 RpsG
gi|561108321|ref|NC_018143.2|	782487	784593	+	RVBD_0684	2	3	0	2		YP_006514027.1	Rv0684	RVBD_0684			elongation factor G FusA1
gi|561108321|ref|NC_018143.2|	784823	786014	+	RVBD_0685	7	2	0	0		YP_006514028.1	Rv0685	RVBD_0685			iron-regulated elongation factor TU Tuf
gi|561108321|ref|NC_018143.2|	786151	786949	+	RVBD_0686	118	183	1	2		YP_006514029.1	Rv0686	RVBD_0686			membrane protein
gi|561108321|ref|NC_018143.2|	787101	787929	+	RVBD_0687	668	748	2	3		YP_006514030.1	Rv0687	RVBD_0687			SDR family oxidoreductase
gi|561108321|ref|NC_018143.2|	787942	789163	+	RVBD_0688	173	191	4	6		YP_006514031.1	Rv0688	RVBD_0688			oxidoreductase
gi|561108321|ref|NC_018143.2|	789159	789414	-	RVBD_0689c	127	126	1	1		YP_006514032.1	Rv0689c	RVBD_0689c			hypothetical protein
gi|561108321|ref|NC_018143.2|	790026	791076	-	RVBD_0690c	153	216	1	1		YP_006514033.1	Rv0690c	RVBD_0690c			hypothetical protein
gi|561108321|ref|NC_018143.2|	791660	791849	+	RVBD_0691A	63	83	0	0		YP_006514035.2	Rv0691A	RVBD_0691A			mycofactocin protein
gi|561108321|ref|NC_018143.2|	791072	791669	-	RVBD_0691c	160	235	0	0		YP_006514034.1	Rv0691c	RVBD_0691c			mycofactocin system transcriptional regulator
gi|561108321|ref|NC_018143.2|	791833	792163	+	RVBD_0692	4232	4893	2	2		YP_006514036.1	Rv0692	RVBD_0692			mycofactocin system RPExFGAL protein
gi|561108321|ref|NC_018143.2|	792159	793335	+	RVBD_0693	39	59	0	0		YP_006514037.1	Rv0693	RVBD_0693			coenzyme PQQ synthesis protein E PqqE
gi|561108321|ref|NC_018143.2|	793337	794528	+	RVBD_0694	483	464	0	0		YP_006514038.1	Rv0694	RVBD_0694			l-lactate dehydrogenase LldD1
gi|561108321|ref|NC_018143.2|	794717	795473	+	RVBD_0695	81	90	0	0		YP_006514039.1	Rv0695	RVBD_0695			creatinine amidohydrolase
gi|561108321|ref|NC_018143.2|	795521	796934	+	RVBD_0696	2720	2820	2	0		YP_006514040.1	Rv0696	RVBD_0696			mycofactocin system glycosyltransferase
gi|561108321|ref|NC_018143.2|	796935	798375	+	RVBD_0697	562	724	2	1		YP_006514041.1	Rv0697	RVBD_0697			dehydrogenase
gi|561108321|ref|NC_018143.2|	798835	799447	+	RVBD_0698	10	13	0	0		YP_006514042.1	Rv0698	RVBD_0698			hypothetical protein
gi|561108321|ref|NC_018143.2|	799631	799853	+	RVBD_0699	0	0	0	0		YP_006514043.1	Rv0699	RVBD_0699			hypothetical protein
gi|561108321|ref|NC_018143.2|	800489	800795	+	RVBD_0700	0	0	0	0		YP_006514044.1	Rv0700	RVBD_0700			30S ribosomal protein S10 RpsJ
gi|561108321|ref|NC_018143.2|	800811	801465	+	RVBD_0701	0	1	0	0		YP_006514045.1	Rv0701	RVBD_0701			50S ribosomal protein L3 RplC
gi|561108321|ref|NC_018143.2|	801464	802136	+	RVBD_0702	0	0	0	0		YP_006514046.1	Rv0702	RVBD_0702			50S ribosomal protein L4 RplD
gi|561108321|ref|NC_018143.2|	802135	802438	+	RVBD_0703	0	0	0	0		YP_006514047.1	Rv0703	RVBD_0703			50S ribosomal protein L23 RplW
gi|561108321|ref|NC_018143.2|	802530	803373	+	RVBD_0704	0	0	0	0		YP_006514048.1	Rv0704	RVBD_0704			50S ribosomal protein L2 RplB
gi|561108321|ref|NC_018143.2|	803413	803695	+	RVBD_0705	0	0	0	0		YP_006514049.1	Rv0705	RVBD_0705			30S ribosomal protein S19 RpsS
gi|561108321|ref|NC_018143.2|	803691	804285	+	RVBD_0706	0	0	0	0		YP_006514050.1	Rv0706	RVBD_0706			50S ribosomal protein L22 RplV
gi|561108321|ref|NC_018143.2|	804284	805109	+	RVBD_0707	0	0	0	0		YP_006514051.1	Rv0707	RVBD_0707			30S ribosomal protein S3 RpsC
gi|561108321|ref|NC_018143.2|	805112	805529	+	RVBD_0708	7	1	0	0		YP_006514052.1	Rv0708	RVBD_0708			50S ribosomal protein L16 RplP
gi|561108321|ref|NC_018143.2|	805528	805762	+	RVBD_0709	4	1	0	0		YP_006514053.1	Rv0709	RVBD_0709			50S ribosomal protein L29 RpmC
gi|561108321|ref|NC_018143.2|	805758	806169	+	RVBD_0710	485	511	0	0		YP_006514054.1	Rv0710	RVBD_0710			30S ribosomal protein S17 RpsQ
gi|561108321|ref|NC_018143.2|	806337	808701	+	RVBD_0711	2283	2612	8	4		YP_006514055.1	Rv0711	RVBD_0711			arylsulfatase AtsA
gi|561108321|ref|NC_018143.2|	808748	809648	+	RVBD_0712	209	348	0	0		YP_006514056.1	Rv0712	RVBD_0712			hypothetical protein
gi|561108321|ref|NC_018143.2|	809948	810890	+	RVBD_0713	1628	2110	7	6		YP_006514057.1	Rv0713	RVBD_0713			transmembrane protein
gi|561108321|ref|NC_018143.2|	811375	811744	+	RVBD_0714	0	0	0	0		YP_006514058.1	Rv0714	RVBD_0714			50S ribosomal protein L14 RplN
gi|561108321|ref|NC_018143.2|	811744	812062	+	RVBD_0715	0	0	0	0		YP_006514059.1	Rv0715	RVBD_0715			50S ribosomal protein L24 RplX
gi|561108321|ref|NC_018143.2|	812061	812625	+	RVBD_0716	2	0	0	0		YP_006514060.1	Rv0716	RVBD_0716			50S ribosomal protein L5 RplE
gi|561108321|ref|NC_018143.2|	812629	812815	+	RVBD_0717	6	16	0	0		YP_006514061.1	Rv0717	RVBD_0717			30S ribosomal protein S14 RpsN1
gi|561108321|ref|NC_018143.2|	812978	813377	+	RVBD_0718	0	0	1	0		YP_006514062.1	Rv0718	RVBD_0718			30S ribosomal protein S8 RpsH
gi|561108321|ref|NC_018143.2|	813400	813940	+	RVBD_0719	0	0	0	0		YP_006514063.1	Rv0719	RVBD_0719			50S ribosomal protein L6 RplF
gi|561108321|ref|NC_018143.2|	813942	814311	+	RVBD_0720	0	0	0	0		YP_006514064.1	Rv0720	RVBD_0720			50S ribosomal protein L18 RplR
gi|561108321|ref|NC_018143.2|	814330	814993	+	RVBD_0721	7	4	0	0		YP_006514065.1	Rv0721	RVBD_0721			30S ribosomal protein S5 RpsE
gi|561108321|ref|NC_018143.2|	814995	815193	+	RVBD_0722	4	3	0	0		YP_006514066.1	Rv0722	RVBD_0722			50S ribosomal protein L30 RpmD
gi|561108321|ref|NC_018143.2|	815192	815633	+	RVBD_0723	48	59	1	0		YP_006514067.1	Rv0723	RVBD_0723			50S ribosomal protein L15 RplO
gi|561108321|ref|NC_018143.2|	815665	817537	+	RVBD_0724	685	905	5	9		YP_006514068.1	Rv0724	RVBD_0724			signal peptide peptidase SppA
gi|561108321|ref|NC_018143.2|	817533	817869	-	RvBD_0724A	14	21	0	1
gi|561108321|ref|NC_018143.2|	817541	818447	-	RVBD_0725c	100	168	0	1		YP_006514069.1	Rv0725c	RVBD_0725c			hypothetical protein
gi|561108321|ref|NC_018143.2|	818539	819643	-	RVBD_0726c	183	198	0	0		YP_006514070.1	Rv0726c	RVBD_0726c			s-adenosylmethionine-dependent methyltransferase
gi|561108321|ref|NC_018143.2|	819845	820502	-	RVBD_0727c	523	522	1	0		YP_006514071.1	Rv0727c	RVBD_0727c			l-fuculose phosphate aldolase FucA
gi|561108321|ref|NC_018143.2|	820498	821479	-	RVBD_0728c	300	240	0	0		YP_006514072.1	Rv0728c	RVBD_0728c			d-3-phosphoglycerate dehydrogenase SerA2
gi|561108321|ref|NC_018143.2|	821509	822856	+	RVBD_0729	477	395	1	0		YP_006514073.1	Rv0729	RVBD_0729			xylulokinase XylB
gi|561108321|ref|NC_018143.2|	822868	823597	+	RVBD_0730	752	654	0	0		YP_006514074.1	Rv0730	RVBD_0730			N-acetyltransferase
gi|561108321|ref|NC_018143.2|	823685	824642	-	RVBD_0731c	1342	1052	3	0		YP_006514075.1	Rv0731c	RVBD_0731c			s-adenosylmethionine-dependent methyltransferase
gi|561108321|ref|NC_018143.2|	824802	826128	+	RVBD_0732	4	3	1	0		YP_006514076.1	Rv0732	RVBD_0732			preprotein translocase subunit SecY
gi|561108321|ref|NC_018143.2|	826124	826670	+	RVBD_0733	467	591	0	1		YP_006514077.1	Rv0733	RVBD_0733			adenylate kinase Adk
gi|561108321|ref|NC_018143.2|	826672	827473	+	RVBD_0734	279	268	3	4		YP_006514078.1	Rv0734	RVBD_0734			methionine aminopeptidase MapA
gi|561108321|ref|NC_018143.2|	827545	828079	+	RVBD_0735	1779	1634	4	3		YP_006514079.1	Rv0735	RVBD_0735			alternative RNA polymerase sigma factor SigL
gi|561108321|ref|NC_018143.2|	828142	828895	+	RVBD_0736	172	182	0	0		YP_006514080.1	Rv0736	RVBD_0736			anti-sigma factor RslA
gi|561108321|ref|NC_018143.2|	829209	829707	+	RVBD_0737	133	105	1	0		YP_006514081.1	Rv0737	RVBD_0737			transcriptional regulator
gi|561108321|ref|NC_018143.2|	830064	830613	+	RVBD_0738	32	15	0	0		YP_006514082.1	Rv0738	RVBD_0738			hypothetical protein
gi|561108321|ref|NC_018143.2|	830857	831664	+	RVBD_0739	331	242	1	5		YP_006514083.1	Rv0739	RVBD_0739			hypothetical protein
gi|561108321|ref|NC_018143.2|	831778	832306	+	RVBD_0740	317	299	2	1		YP_006514084.1	Rv0740	RVBD_0740			hypothetical protein
gi|561108321|ref|NC_018143.2|	832536	832851	+	RVBD_0741	80	74	0	0		YP_006514085.1	Rv0741	RVBD_0741			transposase
gi|561108321|ref|NC_018143.2|	832983	833511	+	RVBD_0742	275	240	1	0		YP_006514086.2	Rv0742	RVBD_0742			PE-PGRS family protein PE_PGRS8
gi|561108321|ref|NC_018143.2|	833888	834446	-	RVBD_0743c	3151	2130	4	4		YP_006514087.1	Rv0743c	RVBD_0743c			hypothetical protein
gi|561108321|ref|NC_018143.2|	835061	835208	-	RVBD_0744Ac	94	72	0	0		YP_006514089.1	Rv0744Ac	RVBD_0744Ac			mycolyltransferase II
gi|561108321|ref|NC_018143.2|	834442	834949	-	RVBD_0744c	49	37	0	0		YP_006514088.1	Rv0744c	RVBD_0744c			transcriptional regulator
gi|561108321|ref|NC_018143.2|	835156	835684	+	RVBD_0745	752	501	0	0		YP_006514090.1	Rv0745	RVBD_0745			hypothetical protein
gi|561108321|ref|NC_018143.2|	835703	838055	+	RVBD_0746	304	154	0	2		YP_006514091.1	Rv0746	RVBD_0746			PE-PGRS family protein PE_PGRS9
gi|561108321|ref|NC_018143.2|	838453	840859	+	RVBD_0747	347	219	0	3		YP_006514092.1	Rv0747	RVBD_0747			PE-PGRS family protein PE_PGRS10
gi|561108321|ref|NC_018143.2|	840949	841207	+	RVBD_0748	123	107	2	4		YP_006514093.1	Rv0748	RVBD_0748			antitoxin VapB31
gi|561108321|ref|NC_018143.2|	841230	841659	+	RVBD_0749	239	198	2	0		YP_006514094.1	Rv0749	RVBD_0749			toxin VapC31
gi|561108321|ref|NC_018143.2|	841739	841877	-	RVBD_0749A	9	6	0	0		YP_006514095.1	Rv0749A	RVBD_0749A			hypothetical protein
gi|561108321|ref|NC_018143.2|	842035	842281	+	RVBD_0750	67	58	1	0		YP_006514096.1	Rv0750	RVBD_0750			hypothetical protein
gi|561108321|ref|NC_018143.2|	842349	843234	-	RVBD_0751c	224	158	0	0		YP_006514097.1	Rv0751c	RVBD_0751c			3-hydroxyisobutyrate dehydrogenase MmsB
gi|561108321|ref|NC_018143.2|	843244	844417	-	RVBD_0752c	266	214	0	0		YP_006514098.1	Rv0752c	RVBD_0752c			acyl-CoA dehydrogenase FadE9
gi|561108321|ref|NC_018143.2|	844423	845956	-	RVBD_0753c	267	252	0	1		YP_006514099.1	Rv0753c	RVBD_0753c			methylmalonate-semialdehyde dehydrogenase MmsA
gi|561108321|ref|NC_018143.2|	846161	847916	+	RVBD_0754	1895	1384	16	8		YP_006514100.1	Rv0754	RVBD_0754			PE-PGRS family protein PE_PGRS11
gi|561108321|ref|NC_018143.2|	850344	850530	-	RVBD_0755A	510	476	6	4		YP_006514102.1	Rv0755A	RVBD_0755A			transposase
gi|561108321|ref|NC_018143.2|	848105	850043	-	RVBD_0755c	885	881	5	6		YP_006514101.1	Rv0755c	RVBD_0755c			PPE family protein PPE12
gi|561108321|ref|NC_018143.2|	850743	851469	-	RVBD_0756c	775	861	4	5		YP_006514103.1	Rv0756c	RVBD_0756c			hypothetical protein
gi|561108321|ref|NC_018143.2|	851610	852354	+	RVBD_0757	62	144	1	1		YP_006514104.1	Rv0757	RVBD_0757			OmpR family two-component system response regulator
gi|561108321|ref|NC_018143.2|	852398	853856	+	RVBD_0758	310	462	3	2		YP_006514105.1	Rv0758	RVBD_0758			OmpR family two-component system sensor histidine kinase
gi|561108321|ref|NC_018143.2|	853827	854160	-	RVBD_0759c	3	7	0	0		YP_006514106.2	Rv0759c	RVBD_0759c			hit-like protein
gi|561108321|ref|NC_018143.2|	854269	854689	-	RVBD_0760c	37	57	0	0		YP_006514107.1	Rv0760c	RVBD_0760c			steroid delta-isomerase
gi|561108321|ref|NC_018143.2|	854701	855829	-	RVBD_0761c	247	238	3	2		YP_006514108.1	Rv0761c	RVBD_0761c			NAD-dependent zinc-type alcohol dehydrogenase AdhB
gi|561108321|ref|NC_018143.2|	855927	856473	-	RVBD_0762c	145	210	0	1		YP_006514109.1	Rv0762c	RVBD_0762c			hypothetical protein
gi|561108321|ref|NC_018143.2|	856475	856682	-	RVBD_0763c	1	1	0	0		YP_006514110.1	Rv0763c	RVBD_0763c			ferredoxin
gi|561108321|ref|NC_018143.2|	856684	858040	-	RVBD_0764c	175	253	5	0		YP_006514111.1	Rv0764c	RVBD_0764c			cytochrome P450 51 Cyp51
gi|561108321|ref|NC_018143.2|	858039	858867	-	RVBD_0765c	23	13	0	0		YP_006514112.1	Rv0765c	RVBD_0765c			oxidoreductase
gi|561108321|ref|NC_018143.2|	858866	860075	-	RVBD_0766c	97	90	0	2		YP_006514113.1	Rv0766c	RVBD_0766c			cytochrome P450 123 Cyp123
gi|561108321|ref|NC_018143.2|	860071	860713	-	RVBD_0767c	88	101	0	0		YP_006514114.1	Rv0767c	RVBD_0767c			hypothetical protein
gi|561108321|ref|NC_018143.2|	860914	862384	+	RVBD_0768	113	132	1	0		YP_006514115.1	Rv0768	RVBD_0768			aldehyde dehydrogenase (NAD+)
gi|561108321|ref|NC_018143.2|	862414	863161	+	RVBD_0769	291	456	3	1		YP_006514116.1	Rv0769	RVBD_0769			3-oxoacyl-[acyl-carrier protein] reductase
gi|561108321|ref|NC_018143.2|	863258	864146	+	RVBD_0770	43	86	4	7		YP_006514117.1	Rv0770	RVBD_0770			dehydrogenase/reductase
gi|561108321|ref|NC_018143.2|	864142	864577	+	RVBD_0771	178	165	2	1		YP_006514118.1	Rv0771	RVBD_0771			4-carboxymuconolactone decarboxylase
gi|561108321|ref|NC_018143.2|	864588	865857	+	RVBD_0772	14	16	2	0		YP_006514119.1	Rv0772	RVBD_0772			phosphoribosylamine glycine ligase PurD
gi|561108321|ref|NC_018143.2|	865853	867392	-	RVBD_0773c	540	636	4	6		YP_006514120.1	Rv0773c	RVBD_0773c			bifunctional acylase GgtA
gi|561108321|ref|NC_018143.2|	867442	868354	-	RVBD_0774c	101	94	0	0		YP_006514121.1	Rv0774c	RVBD_0774c			exported protein
gi|561108321|ref|NC_018143.2|	868409	869033	+	RVBD_0775	994	937	7	7		YP_006514122.1	Rv0775	RVBD_0775			hypothetical protein
gi|561108321|ref|NC_018143.2|	868986	869766	-	RVBD_0776c	564	571	6	7		YP_006514123.1	Rv0776c	RVBD_0776c			hypothetical protein
gi|561108321|ref|NC_018143.2|	870010	871429	+	RVBD_0777	31	33	0	0		YP_006514124.1	Rv0777	RVBD_0777			adenylosuccinate lyase PurB
gi|561108321|ref|NC_018143.2|	871433	872678	+	RVBD_0778	145	161	3	1		YP_006514125.1	Rv0778	RVBD_0778			cytochrome P450 126 Cyp126
gi|561108321|ref|NC_018143.2|	872674	873295	-	RVBD_0779c	30	25	0	0		YP_006514126.1	Rv0779c	RVBD_0779c			transmembrane protein
gi|561108321|ref|NC_018143.2|	873345	874239	+	RVBD_0780	13	19	0	0		YP_006514127.1	Rv0780	RVBD_0780			phosphoribosylaminoimidazole-succinocarboxamide synthase PurC
gi|561108321|ref|NC_018143.2|	874235	874946	+	RVBD_0781	177	244	0	4		YP_006514128.1	Rv0781	RVBD_0781			protease II PtrB
gi|561108321|ref|NC_018143.2|	874734	876393	+	RVBD_0782	165	181	1	1		YP_006514129.1	Rv0782	RVBD_0782			protease II PtrB
gi|561108321|ref|NC_018143.2|	876820	878443	-	RVBD_0783c	101	88	0	0		YP_006514131.1	Rv0783c	RVBD_0783c			multidrug resistance integral membrane efflux protein EmrB
gi|561108321|ref|NC_018143.2|	878640	879327	+	RVBD_0784	20	11	0	0		YP_006514132.1	Rv0784	RVBD_0784			hypothetical protein
gi|561108321|ref|NC_018143.2|	879342	881043	+	RVBD_0785	387	443	1	0		YP_006514133.1	Rv0785	RVBD_0785			KsdD-like steroid dehydrogenase
gi|561108321|ref|NC_018143.2|	881077	881716	-	RVBD_0786c	332	361	4	2		YP_006514134.1	Rv0786c	RVBD_0786c			hypothetical protein
gi|561108321|ref|NC_018143.2|	881461	882421	+	RVBD_0787	434	431	0	0		YP_006514135.1	Rv0787	RVBD_0787			hypothetical protein
gi|561108321|ref|NC_018143.2|	882526	882766	+	RVBD_0787A	0	0	0	0		YP_006514136.1	Rv0787A	RVBD_0787A			phosphoribosylformylglycinamidine synthase
gi|561108321|ref|NC_018143.2|	882762	883437	+	RVBD_0788	0	0	2	0		YP_006514137.1	Rv0788	RVBD_0788			phosphoribosylformylglycinamidine synthase I PURG
gi|561108321|ref|NC_018143.2|	883453	884053	-	RVBD_0789c	67	101	1	0		YP_006514138.1	Rv0789c	RVBD_0789c			hypothetical protein
gi|561108321|ref|NC_018143.2|	884074	884803	-	RVBD_0790c	136	171	0	1		YP_006514139.1	Rv0790c	RVBD_0790c			hypothetical protein
gi|561108321|ref|NC_018143.2|	884799	885843	-	RVBD_0791c	68	69	0	0		YP_006514140.1	Rv0791c	RVBD_0791c			hypothetical protein
gi|561108321|ref|NC_018143.2|	885839	886649	-	RVBD_0792c	373	531	3	3		YP_006514141.1	Rv0792c	RVBD_0792c			transcriptional regulator GntR-family
gi|561108321|ref|NC_018143.2|	886721	887027	+	RVBD_0793	975	1250	2	2		YP_006514142.1	Rv0793	RVBD_0793			monooxygenase
gi|561108321|ref|NC_018143.2|	887139	888639	-	RVBD_0794c	204	312	1	2		YP_006514143.1	Rv0794c	RVBD_0794c			dihydrolipoamide dehydrogenase
gi|561108321|ref|NC_018143.2|	889074	889401	+	RVBD_0795	210	334	0	0		YP_006514144.1	Rv0795	RVBD_0795			transposase
gi|561108321|ref|NC_018143.2|	889451	890336	+	RVBD_0796	651	946	1	2		YP_006514145.1	Rv0796	RVBD_0796			transposase
gi|561108321|ref|NC_018143.2|	890390	891485	+	RVBD_0797	152	239	2	2		YP_006514146.1	Rv0797	RVBD_0797			transposase
gi|561108321|ref|NC_018143.2|	891474	892272	-	RVBD_0798c	135	185	1	2		YP_006514147.1	Rv0798c	RVBD_0798c			antigen Cfp29
gi|561108321|ref|NC_018143.2|	892268	893276	-	RVBD_0799c	131	181	1	0		YP_006514148.1	Rv0799c	RVBD_0799c			dyp-type peroxidase
gi|561108321|ref|NC_018143.2|	893320	894622	+	RVBD_0800	229	266	1	4		YP_006514149.1	Rv0800	RVBD_0800			aminopeptidase PepC
gi|561108321|ref|NC_018143.2|	894633	894981	+	RVBD_0801	53	74	4	3		YP_006514150.1	Rv0801	RVBD_0801			hypothetical protein
gi|561108321|ref|NC_018143.2|	894974	895631	-	RVBD_0802c	972	1016	74	103		YP_006514151.1	Rv0802c	RVBD_0802c			succinyltransferase
gi|561108321|ref|NC_018143.2|	895822	898087	+	RVBD_0803	0	0	0	0		YP_006514152.1	Rv0803	RVBD_0803			phosphoribosylformylglycinamidine synthase II PurL
gi|561108321|ref|NC_018143.2|	898083	898713	+	RVBD_0804	782	645	1	1		YP_006514153.1	Rv0804	RVBD_0804			hypothetical protein
gi|561108321|ref|NC_018143.2|	898833	899790	+	RVBD_0805	212	256	1	0		YP_006514154.1	Rv0805	RVBD_0805			cyclic nucleotide phosphodiesterase
gi|561108321|ref|NC_018143.2|	899734	901333	-	RVBD_0806c	4870	5401	18	17		YP_006514155.1	Rv0806c	RVBD_0806c			UDP-glucose-4-epimerase CpsY
gi|561108321|ref|NC_018143.2|	901637	902027	+	RVBD_0807	32	35	0	0		YP_006514156.1	Rv0807	RVBD_0807			hypothetical protein
gi|561108321|ref|NC_018143.2|	902113	903697	+	RVBD_0808	32	38	2	2		YP_006514157.1	Rv0808	RVBD_0808			amidophosphoribosyltransferase PurF
gi|561108321|ref|NC_018143.2|	903727	904822	+	RVBD_0809	71	102	2	1		YP_006514158.1	Rv0809	RVBD_0809			phosphoribosylformylglycinamidine CYCLO-ligase PurM
gi|561108321|ref|NC_018143.2|	904907	905090	-	RVBD_0810c	6	10	3	2		YP_006514159.1	Rv0810c	RVBD_0810c			hypothetical protein
gi|561108321|ref|NC_018143.2|	905236	906343	-	RVBD_0811c	0	0	1	1		YP_006514160.1	Rv0811c	RVBD_0811c			folate-binding protein YgfZ
gi|561108321|ref|NC_018143.2|	906425	907295	+	RVBD_0812	77	180	1	0		YP_006514161.1	Rv0812	RVBD_0812			amino acid aminotransferase
gi|561108321|ref|NC_018143.2|	907340	908021	-	RVBD_0813c	119	139	0	0		YP_006514162.1	Rv0813c	RVBD_0813c			fatty acid-binding protein-like protein
gi|561108321|ref|NC_018143.2|	908183	908486	-	RVBD_0814c	114	124	2	3		YP_006514164.1	Rv0814c	RVBD_0814c			hypothetical protein
gi|561108321|ref|NC_018143.2|	908487	909321	-	RVBD_0815c	209	253	0	4		YP_006514165.1	Rv0815c	RVBD_0815c			thiosulfate sulfurtransferase CysA2
gi|561108321|ref|NC_018143.2|	909613	910036	-	RVBD_0816c	5	13	2	5		YP_006514166.1	Rv0816c	RVBD_0816c			thioredoxin ThiX
gi|561108321|ref|NC_018143.2|	910032	910845	-	RVBD_0817c	4	8	0	0		YP_006514167.1	Rv0817c	RVBD_0817c			exported protein
gi|561108321|ref|NC_018143.2|	910974	911742	+	RVBD_0818	2960	2810	3	0		YP_006514168.1	Rv0818	RVBD_0818			transcriptional regulator
gi|561108321|ref|NC_018143.2|	911738	912686	+	RVBD_0819	55	74	0	0		YP_006514169.1	Rv0819	RVBD_0819			N-acetyltransferase MshD
gi|561108321|ref|NC_018143.2|	912728	913505	+	RVBD_0820	123	194	0	0		YP_006514170.1	Rv0820	RVBD_0820			phosphate-transport ABC transporter ATP-binding protein PhoT
gi|561108321|ref|NC_018143.2|	913560	914202	-	RVBD_0821c	108	145	2	1		YP_006514171.1	Rv0821c	RVBD_0821c			phosphate-transport system transcriptional regulator PhoY2
gi|561108321|ref|NC_018143.2|	914259	916314	-	RVBD_0822c	7280	8988	38	29		YP_006514172.1	Rv0822c	RVBD_0822c			hypothetical protein
gi|561108321|ref|NC_018143.2|	916479	917649	-	RVBD_0823c	317	433	2	4		YP_006514173.1	Rv0823c	RVBD_0823c			transcriptional regulator
gi|561108321|ref|NC_018143.2|	917736	918753	-	RVBD_0824c	104	128	1	0		YP_006514174.1	Rv0824c	RVBD_0824c			acyl carrier protein desaturase DesA1
gi|561108321|ref|NC_018143.2|	918914	919556	-	RVBD_0825c	242	407	0	0		YP_006514175.1	Rv0825c	RVBD_0825c			hypothetical protein
gi|561108321|ref|NC_018143.2|	919636	920692	+	RVBD_0826	565	652	17	15		YP_006514176.1	Rv0826	RVBD_0826			hypothetical protein
gi|561108321|ref|NC_018143.2|	920743	921136	-	RVBD_0827c	54	85	0	0		YP_006514177.1	Rv0827c	RVBD_0827c			ArsR family transcriptional regulator KmtR
gi|561108321|ref|NC_018143.2|	921193	921616	-	RVBD_0828c	2329	2850	3	2		YP_006514178.1	Rv0828c	RVBD_0828c			deaminase
gi|561108321|ref|NC_018143.2|	921577	921868	+	RVBD_0829	72	78	0	0		YP_006514179.1	Rv0829	RVBD_0829			transposase
gi|561108321|ref|NC_018143.2|	921972	922878	+	RVBD_0830	1190	1479	1	5		YP_006514180.1	Rv0830	RVBD_0830			s-adenosylmethionine-dependent methyltransferase
gi|561108321|ref|NC_018143.2|	922896	923712	-	RVBD_0831c	1768	2166	8	7		YP_006514181.1	Rv0831c	RVBD_0831c			hypothetical protein
gi|561108321|ref|NC_018143.2|	924953	925367	+	RVBD_0832	140	112	0	1		YP_006514182.1	Rv0832	RVBD_0832			PE-PGRS family protein PE_PGRS12
gi|561108321|ref|NC_018143.2|	925363	927613	+	RVBD_0833	22	23	0	0		YP_006514183.1	Rv0833	RVBD_0833			PE-PGRS family protein PE_PGRS13
gi|561108321|ref|NC_018143.2|	927839	930488	-	RVBD_0834c	666	507	3	7		YP_006514184.1	Rv0834c	RVBD_0834c			PE-PGRS family protein PE_PGRS14
gi|561108321|ref|NC_018143.2|	930955	931600	+	RVBD_0835	282	272	1	3		YP_006514185.1	Rv0835	RVBD_0835			lipoprotein LpqQ
gi|561108321|ref|NC_018143.2|	932281	932935	-	RVBD_0836c	282	395	1	3		YP_006514187.2	Rv0836c	RVBD_0836c			hypothetical protein
gi|561108321|ref|NC_018143.2|	933005	934034	-	RVBD_0837c	328	377	0	1		YP_006514188.1	Rv0837c	RVBD_0837c			hypothetical protein
gi|561108321|ref|NC_018143.2|	934722	935493	+	RVBD_0838	179	209	0	0		YP_006514189.1	Rv0838	RVBD_0838			lipoprotein LpqR
gi|561108321|ref|NC_018143.2|	935579	936392	+	RVBD_0839	1011	1404	1	2		YP_006514190.1	Rv0839	RVBD_0839			hypothetical protein
gi|561108321|ref|NC_018143.2|	936459	937320	-	RVBD_0840c	1068	1169	1	3		YP_006514191.1	Rv0840c	RVBD_0840c			proline iminopeptidase Pip
gi|561108321|ref|NC_018143.2|	937595	937838	+	RVBD_0841	24	36	0	0		YP_006514192.1	Rv0841	RVBD_0841			transmembrane protein
gi|561108321|ref|NC_018143.2|	938114	939407	+	RVBD_0842	183	242	0	3		YP_006514193.1	Rv0842	RVBD_0842			integral membrane protein
gi|561108321|ref|NC_018143.2|	939390	940395	+	RVBD_0843	240	394	4	3		YP_006514194.1	Rv0843	RVBD_0843			pyruvate dehydrogenase E1 component
gi|561108321|ref|NC_018143.2|	940458	941109	-	RVBD_0844c	93	117	4	3		YP_006514195.1	Rv0844c	RVBD_0844c			nitrate/nitrite response transcriptional regulator NarL
gi|561108321|ref|NC_018143.2|	941192	942470	+	RVBD_0845	274	429	1	0		YP_006514196.1	Rv0845	RVBD_0845			NarL family two-component system sensor histidine kinase
gi|561108321|ref|NC_018143.2|	942682	944197	-	RVBD_0846c	348	332	1	1		YP_006514197.1	Rv0846c	RVBD_0846c			oxidoreductase
gi|561108321|ref|NC_018143.2|	944345	944738	+	RVBD_0847	617	675	1	3		YP_006514198.1	Rv0847	RVBD_0847			lipoprotein LpqS
gi|561108321|ref|NC_018143.2|	944940	946059	+	RVBD_0848	295	377	6	9		YP_006514199.1	Rv0848	RVBD_0848			cysteine synthase A CysK2
gi|561108321|ref|NC_018143.2|	946058	947318	+	RVBD_0849	122	172	4	3		YP_006514200.1	Rv0849	RVBD_0849			integral membrane transporter
gi|561108321|ref|NC_018143.2|	947314	947647	+	RVBD_0850	10	27	0	0		YP_006514201.1	Rv0850	RVBD_0850			transposase
gi|561108321|ref|NC_018143.2|	947643	948471	-	RVBD_0851c	79	113	4	1		YP_006514202.1	Rv0851c	RVBD_0851c			oxidoreductase
gi|561108321|ref|NC_018143.2|	948561	949398	+	RVBD_0852	921	997	5	3		YP_006514203.1	Rv0852	RVBD_0852			fatty-acid-CoA ligase FadD16
gi|561108321|ref|NC_018143.2|	949438	951121	-	RVBD_0853c	802	1088	4	3		YP_006514204.1	Rv0853c	RVBD_0853c			pyruvate or indole-3-pyruvate decarboxylase Pdc
gi|561108321|ref|NC_018143.2|	951185	951629	+	RVBD_0854	359	444	12	11		YP_006514205.1	Rv0854	RVBD_0854			hypothetical protein
gi|561108321|ref|NC_018143.2|	951634	952714	+	RVBD_0855	338	469	3	3		YP_006514206.1	Rv0855	RVBD_0855			fatty-acid-CoA racemase Far
gi|561108321|ref|NC_018143.2|	952827	953232	+	RVBD_0856	1963	2433	2	1		YP_006514207.1	Rv0856	RVBD_0856			hypothetical protein
gi|561108321|ref|NC_018143.2|	953259	953733	+	RVBD_0857	153	186	1	0		YP_006514208.1	Rv0857	RVBD_0857			hypothetical protein
gi|561108321|ref|NC_018143.2|	953729	954923	-	RVBD_0858c	290	337	0	0		YP_006514209.1	Rv0858c	RVBD_0858c			n-succinyldiaminopimelate aminotransferase DapC
gi|561108321|ref|NC_018143.2|	955079	956291	+	RVBD_0859	68	90	0	0		YP_006514210.1	Rv0859	RVBD_0859			acyl-CoA thiolase FadA
gi|561108321|ref|NC_018143.2|	956295	958458	+	RVBD_0860	165	202	0	0		YP_006514211.1	Rv0860	RVBD_0860			fatty oxidation protein FadB
gi|561108321|ref|NC_018143.2|	958525	960154	-	RVBD_0861c	366	375	0	0		YP_006514212.1	Rv0861c	RVBD_0861c			DNA helicase Ercc3
gi|561108321|ref|NC_018143.2|	960344	962615	-	RVBD_0862c	1371	1159	1	4		YP_006514213.1	Rv0862c	RVBD_0862c			hypothetical protein
gi|561108321|ref|NC_018143.2|	962601	962883	+	RVBD_0863	27	24	0	0		YP_006514214.1	Rv0863	RVBD_0863			hypothetical protein
gi|561108321|ref|NC_018143.2|	962892	963396	+	RVBD_0864	1709	1662	2	0		YP_006514215.1	Rv0864	RVBD_0864			molybdenum cofactor biosynthesis protein C2 MoaC2
gi|561108321|ref|NC_018143.2|	963392	963875	+	RVBD_0865	2141	1715	1	0		YP_006514216.1	Rv0865	RVBD_0865			molybdopterin biosynthesis protein Mog
gi|561108321|ref|NC_018143.2|	963871	964297	+	RVBD_0866	100	108	0	0		YP_006514217.1	Rv0866	RVBD_0866			molybdenum cofactor biosynthesis protein E2 MoaE2
gi|561108321|ref|NC_018143.2|	964314	965538	-	RVBD_0867c	1687	1516	14	8		YP_006514218.1	Rv0867c	RVBD_0867c			resuscitation-promoting factor RpfA
gi|561108321|ref|NC_018143.2|	965985	966264	-	RVBD_0868c	502	364	13	10		YP_006514219.1	Rv0868c	RVBD_0868c			molybdenum cofactor biosynthesis protein D2 MoaD2
gi|561108321|ref|NC_018143.2|	966267	967350	-	RVBD_0869c	669	468	4	7		YP_006514220.1	Rv0869c	RVBD_0869c			molybdenum cofactor biosynthesis protein A2 MoaA2
gi|561108321|ref|NC_018143.2|	967346	967736	-	RVBD_0870c	76	60	1	0		YP_006514221.1	Rv0870c	RVBD_0870c			integral membrane protein
gi|561108321|ref|NC_018143.2|	967900	968308	+	RVBD_0871	252	217	0	0		YP_006514222.1	Rv0871	RVBD_0871			cold shock protein B CspB
gi|561108321|ref|NC_018143.2|	968426	970247	-	RVBD_0872c	1587	1212	6	8		YP_006514223.1	Rv0872c	RVBD_0872c			PE-PGRS family protein PE_PGRS15
gi|561108321|ref|NC_018143.2|	970507	972460	+	RVBD_0873	1857	1619	11	6		YP_006514224.1	Rv0873	RVBD_0873			acyl-CoA dehydrogenase FadE10
gi|561108321|ref|NC_018143.2|	972548	973709	-	RVBD_0874c	2334	1736	6	9		YP_006514225.1	Rv0874c	RVBD_0874c			hypothetical protein
gi|561108321|ref|NC_018143.2|	973808	974297	-	RVBD_0875c	21	32	2	3		YP_006514226.1	Rv0875c	RVBD_0875c			exported protein
gi|561108321|ref|NC_018143.2|	974293	975940	-	RVBD_0876c	393	623	0	0		YP_006514227.1	Rv0876c	RVBD_0876c			transmembrane protein
gi|561108321|ref|NC_018143.2|	976077	976866	+	RVBD_0877	1070	1133	62	83		YP_006514228.1	Rv0877	RVBD_0877			hypothetical protein
gi|561108321|ref|NC_018143.2|	976874	978206	-	RVBD_0878c	366	360	4	4		YP_006514229.1	Rv0878c	RVBD_0878c			PPE family protein PPE13
gi|561108321|ref|NC_018143.2|	978483	978759	-	RVBD_0879c	16	12	0	0		YP_006514230.1	Rv0879c	RVBD_0879c			transmembrane protein
gi|561108321|ref|NC_018143.2|	978936	979368	+	RVBD_0880	255	217	2	0		YP_006514231.1	Rv0880	RVBD_0880			transcriptional regulator MarR-family
gi|561108321|ref|NC_018143.2|	979364	980231	+	RVBD_0881	93	214	2	0		YP_006514232.1	Rv0881	RVBD_0881			methyltransferase
gi|561108321|ref|NC_018143.2|	980227	980512	+	RVBD_0882	47	44	0	0		YP_006514233.1	Rv0882	RVBD_0882			transmembrane protein
gi|561108321|ref|NC_018143.2|	980508	981270	-	RVBD_0883c	0	0	0	0		YP_006514234.1	Rv0883c	RVBD_0883c			hypothetical protein
gi|561108321|ref|NC_018143.2|	981426	982557	-	RVBD_0884c	394	394	2	7		YP_006514235.1	Rv0884c	RVBD_0884c			phosphoserine aminotransferase SerC
gi|561108321|ref|NC_018143.2|	982764	983787	+	RVBD_0885	226	297	0	0		YP_006514236.1	Rv0885	RVBD_0885			hypothetical protein
gi|561108321|ref|NC_018143.2|	983805	985533	+	RVBD_0886	267	283	0	0		YP_006514237.1	Rv0886	RVBD_0886			NADPH:adrenodoxin oxidoreductase FprB
gi|561108321|ref|NC_018143.2|	985515	985974	-	RVBD_0887c	32	31	0	0		YP_006514238.1	Rv0887c	RVBD_0887c			protein PhnB
gi|561108321|ref|NC_018143.2|	987235	988708	+	RVBD_0888	1279	1283	7	10		YP_006514240.1	Rv0888	RVBD_0888			exported protein
gi|561108321|ref|NC_018143.2|	988742	989864	-	RVBD_0889c	426	362	0	1		YP_006514241.1	Rv0889c	RVBD_0889c			citrate synthase II CitA
gi|561108321|ref|NC_018143.2|	989950	992599	-	RVBD_0890c	3842	4034	8	4		YP_006514242.1	Rv0890c	RVBD_0890c			transcriptional regulator LuxR-family
gi|561108321|ref|NC_018143.2|	992600	993458	-	RVBD_0891c	111	181	1	0		YP_006514243.1	Rv0891c	RVBD_0891c			transcriptional regulator
gi|561108321|ref|NC_018143.2|	993855	995343	+	RVBD_0892	40	129	1	1		YP_006514245.1	Rv0892	RVBD_0892			monooxygenase
gi|561108321|ref|NC_018143.2|	995320	996298	-	RVBD_0893c	6	3	0	0		YP_006514246.1	Rv0893c	RVBD_0893c			s-adenosylmethionine-dependent methyltransferase
gi|561108321|ref|NC_018143.2|	996526	997708	+	RVBD_0894	95	158	0	0		YP_006514247.1	Rv0894	RVBD_0894			transcriptional regulator LuxR-family
gi|561108321|ref|NC_018143.2|	997784	999302	+	RVBD_0895	2091	2385	2	0		YP_006514248.1	Rv0895	RVBD_0895			diacylglycerol acyltransferase
gi|561108321|ref|NC_018143.2|	999474	1000770	+	RVBD_0896	9	13	0	2		YP_006514249.1	Rv0896	RVBD_0896			citrate synthase I GltA2
gi|561108321|ref|NC_018143.2|	1000810	1002418	-	RVBD_0897c	143	164	1	2		YP_006514250.1	Rv0897c	RVBD_0897c			oxidoreductase
gi|561108321|ref|NC_018143.2|	1002443	1002707	-	RVBD_0898c	25	31	0	0		YP_006514251.1	Rv0898c	RVBD_0898c			hypothetical protein
gi|561108321|ref|NC_018143.2|	1002814	1003795	+	RVBD_0899	635	531	0	2		YP_006514252.1	Rv0899	RVBD_0899			outer membrane protein A OmpA
gi|561108321|ref|NC_018143.2|	1003807	1003960	+	RVBD_0900	15	21	0	0		YP_006514253.1	Rv0900	RVBD_0900			membrane protein
gi|561108321|ref|NC_018143.2|	1003959	1004487	+	RVBD_0901	1812	1751	4	4		YP_006514254.1	Rv0901	RVBD_0901			exported or membrane protein
gi|561108321|ref|NC_018143.2|	1004503	1005844	-	RVBD_0902c	1085	943	2	2		YP_006514255.1	Rv0902c	RVBD_0902c			two-component system sensor histidine kinase PrrB
gi|561108321|ref|NC_018143.2|	1005854	1006565	-	RVBD_0903c	8	13	0	0		YP_006514256.1	Rv0903c	RVBD_0903c			two-component system transcriptional regulator PrrA
gi|561108321|ref|NC_018143.2|	1006695	1008183	-	RVBD_0904c	2616	2195	9	9		YP_006514257.1	Rv0904c	RVBD_0904c			acetyl-CoA carboxylase carboxyl transferase AccD3
gi|561108321|ref|NC_018143.2|	1008209	1008941	+	RVBD_0905	1921	2064	17	18		YP_006514258.1	Rv0905	RVBD_0905			enoyl-CoA hydratase EchA6
gi|561108321|ref|NC_018143.2|	1008946	1010065	+	RVBD_0906	256	236	4	3		YP_006514259.1	Rv0906	RVBD_0906			hypothetical protein
gi|561108321|ref|NC_018143.2|	1010049	1011738	+	RVBD_0907	82	111	0	0		YP_006514260.1	Rv0907	RVBD_0907			beta-lactamase
gi|561108321|ref|NC_018143.2|	1011734	1014128	+	RVBD_0908	2194	2967	10	2		YP_006514261.1	Rv0908	RVBD_0908			metal cation transporter P-type ATPase CtpE
gi|561108321|ref|NC_018143.2|	1014684	1014864	+	RVBD_0909	30	60	0	0		YP_006514263.1	Rv0909	RVBD_0909			hypothetical protein
gi|561108321|ref|NC_018143.2|	1014869	1015304	+	RVBD_0910	398	617	1	1		YP_006514264.1	Rv0910	RVBD_0910			hypothetical protein
gi|561108321|ref|NC_018143.2|	1015401	1016175	+	RVBD_0911	1147	1558	4	12		YP_006514265.1	Rv0911	RVBD_0911			hypothetical protein
gi|561108321|ref|NC_018143.2|	1016239	1016689	+	RVBD_0912	37	64	0	0		YP_006514266.1	Rv0912	RVBD_0912			transmembrane protein
gi|561108321|ref|NC_018143.2|	1017220	1018729	-	RVBD_0913c	103	170	0	0		YP_006514268.1	Rv0913c	RVBD_0913c			carotenoid cleavage dioxygenase
gi|561108321|ref|NC_018143.2|	1018730	1019969	-	RVBD_0914c	705	701	5	3		YP_006514269.1	Rv0914c	RVBD_0914c			acetyl-CoA acetyltransferase
gi|561108321|ref|NC_018143.2|	1020061	1021333	-	RVBD_0915c	796	761	4	11		YP_006514270.1	Rv0915c	RVBD_0915c			PPE family protein PPE14
gi|561108321|ref|NC_018143.2|	1021347	1021647	-	RVBD_0916c	3	11	0	0		YP_006514271.1	Rv0916c	RVBD_0916c			PE family protein PE7
gi|561108321|ref|NC_018143.2|	1022090	1023872	+	RVBD_0917	444	636	6	13		YP_006514272.1	Rv0917	RVBD_0917			glycine betaine transport integral membrane protein BetP
gi|561108321|ref|NC_018143.2|	1024214	1024691	+	RVBD_0918	34	28	0	0		YP_006514274.1	Rv0918	RVBD_0918			hypothetical protein
gi|561108321|ref|NC_018143.2|	1024687	1025188	+	RVBD_0919	780	1193	8	8		YP_006514275.1	Rv0919	RVBD_0919			N-acetyltransferase
gi|561108321|ref|NC_018143.2|	1025500	1026820	-	RVBD_0920c	59	115	3	2		YP_006514276.1	Rv0920c	RVBD_0920c			transposase
gi|561108321|ref|NC_018143.2|	1027107	1027689	+	RVBD_0921	197	307	3	2		YP_006514277.1	Rv0921	RVBD_0921			resolvase
gi|561108321|ref|NC_018143.2|	1027688	1029341	+	RVBD_0922	1325	1827	2	3		YP_006514278.1	Rv0922	RVBD_0922			transposase
gi|561108321|ref|NC_018143.2|	1029516	1030581	-	RVBD_0923c	1191	1708	4	3		YP_006514279.1	Rv0923c	RVBD_0923c			hypothetical protein
gi|561108321|ref|NC_018143.2|	1030581	1031868	-	RVBD_0924c	772	1057	5	2		YP_006514280.1	Rv0924c	RVBD_0924c			divalent cation-transport integral membrane protein MntH
gi|561108321|ref|NC_018143.2|	1031899	1032637	-	RVBD_0925c	292	531	2	3		YP_006514281.1	Rv0925c	RVBD_0925c			manganese transporter
gi|561108321|ref|NC_018143.2|	1032713	1033790	-	RVBD_0926c	75	133	0	0		YP_006514282.1	Rv0926c	RVBD_0926c			dihydrodipicolinate reductase
gi|561108321|ref|NC_018143.2|	1033843	1034635	-	RVBD_0927c	93	121	0	0		YP_006514283.1	Rv0927c	RVBD_0927c			7-alpha-hydroxysteroid dehydrogenase
gi|561108321|ref|NC_018143.2|	1034906	1036019	+	RVBD_0928	38	94	0	0		YP_006514284.1	Rv0928	RVBD_0928			periplasmic phosphate-binding lipoprotein PstS3
gi|561108321|ref|NC_018143.2|	1036031	1037006	+	RVBD_0929	19	53	0	0		YP_006514285.1	Rv0929	RVBD_0929			phosphate-transport ABC transporter integral membrane protein PstC2
gi|561108321|ref|NC_018143.2|	1037014	1037917	+	RVBD_0930	35	50	0	0		YP_006514286.1	Rv0930	RVBD_0930			phosphate-transport ABC transporter integral membrane protein PstA1
gi|561108321|ref|NC_018143.2|	1037923	1039918	-	RVBD_0931c	3578	5810	16	17		YP_006514287.1	Rv0931c	RVBD_0931c			transmembrane serine/threonine-protein kinase D PknD
gi|561108321|ref|NC_018143.2|	1039939	1041052	-	RVBD_0932c	234	501	9	9		YP_006514288.1	Rv0932c	RVBD_0932c			periplasmic phosphate-binding lipoprotein PstS2
gi|561108321|ref|NC_018143.2|	1041267	1042098	+	RVBD_0933	257	326	4	2		YP_006514289.1	Rv0933	RVBD_0933			phosphate-transport ABC transporter ATP-binding protein PstB
gi|561108321|ref|NC_018143.2|	1042118	1043243	+	RVBD_0934	176	301	30	33		YP_006514290.1	Rv0934	RVBD_0934			periplasmic phosphate-binding lipoprotein PstS1
gi|561108321|ref|NC_018143.2|	1043302	1044319	+	RVBD_0935	169	363	4	7		YP_006514291.1	Rv0935	RVBD_0935			phosphate-transport ABC transporter integral membrane protein PstC1
gi|561108321|ref|NC_018143.2|	1044320	1045226	+	RVBD_0936	485	803	3	2		YP_006514292.1	Rv0936	RVBD_0936			phosphate-transport ABC transporter integral membrane protein PstA2
gi|561108321|ref|NC_018143.2|	1045202	1046024	-	RVBD_0937c	92	189	2	2		YP_006514293.1	Rv0937c	RVBD_0937c			DNA end-binding protein Mku
gi|561108321|ref|NC_018143.2|	1046139	1048419	+	RVBD_0938	90	121	1	0		YP_006514294.1	Rv0938	RVBD_0938			ATP dependent DNA ligase LigD
gi|561108321|ref|NC_018143.2|	1048415	1050350	+	RVBD_0939	106	109	2	0		YP_006514295.1	Rv0939	RVBD_0939			bifunctional enzyme 2-hydroxyhepta-2
gi|561108321|ref|NC_018143.2|	1050596	1051463	-	RVBD_0940c	128	209	0	1		YP_006514296.1	Rv0940c	RVBD_0940c			oxidoreductase
gi|561108321|ref|NC_018143.2|	1051547	1052321	-	RVBD_0941c	787	972	0	0		YP_006514297.1	Rv0941c	RVBD_0941c			anti-anti-sigma factor
gi|561108321|ref|NC_018143.2|	1052363	1052642	+	RVBD_0942	62	80	4	4		YP_006514298.1	Rv0942	RVBD_0942			hypothetical protein
gi|561108321|ref|NC_018143.2|	1052699	1053740	-	RVBD_0943c	735	916	1	5		YP_006514299.1	Rv0943c	RVBD_0943c			oxidoreductase
gi|561108321|ref|NC_018143.2|	1053768	1054245	+	RVBD_0944	32	109	0	0		YP_006514300.1	Rv0944	RVBD_0944			formamidopyrimidine-DNA glycosylase
gi|561108321|ref|NC_018143.2|	1054250	1055012	+	RVBD_0945	22	53	0	0		YP_006514301.1	Rv0945	RVBD_0945			oxidoreductase
gi|561108321|ref|NC_018143.2|	1055027	1056689	-	RVBD_0946c	13	71	0	0		YP_006514302.1	Rv0946c	RVBD_0946c			glucose-6-phosphate isomerase Pgi
gi|561108321|ref|NC_018143.2|	1057649	1057967	-	RVBD_0948c	0	0	0	0		YP_006514305.1	Rv0948c	RVBD_0948c			chorismate mutase
gi|561108321|ref|NC_018143.2|	1058263	1060579	+	RVBD_0949	25	31	0	0		YP_006514306.1	Rv0949	RVBD_0949			ATP-dependent DNA helicase II UvrD1
gi|561108321|ref|NC_018143.2|	1060659	1061658	-	RVBD_0950c	679	1193	3	4		YP_006514307.1	Rv0950c	RVBD_0950c			hypothetical protein
gi|561108321|ref|NC_018143.2|	1061967	1063131	+	RVBD_0951	1	1	3	3		YP_006514308.1	Rv0951	RVBD_0951			succinyl-CoA synthetase beta chain SucC
gi|561108321|ref|NC_018143.2|	1063143	1064055	+	RVBD_0952	251	309	0	0		YP_006514309.1	Rv0952	RVBD_0952			succinyl-CoA synthetase alpha chain SucD
gi|561108321|ref|NC_018143.2|	1064117	1064966	-	RVBD_0953c	158	204	0	0		YP_006514310.1	Rv0953c	RVBD_0953c			oxidoreductase
gi|561108321|ref|NC_018143.2|	1065130	1066042	+	RVBD_0954	2460	3488	25	28		YP_006514311.1	Rv0954	RVBD_0954			transmembrane protein
gi|561108321|ref|NC_018143.2|	1066081	1067449	+	RVBD_0955	23	57	0	0		YP_006514312.1	Rv0955	RVBD_0955			integral membrane protein
gi|561108321|ref|NC_018143.2|	1067564	1068212	+	RVBD_0956	0	2	1	0		YP_006514313.1	Rv0956	RVBD_0956			5'-phosphoribosylglycinamide formyltransferase PurN
gi|561108321|ref|NC_018143.2|	1068208	1069780	+	RVBD_0957	0	0	1	0		YP_006514314.1	Rv0957	RVBD_0957			bifunctional purine biosynthesis protein PurH
gi|561108321|ref|NC_018143.2|	1069886	1071266	+	RVBD_0958	418	342	1	0		YP_006514315.1	Rv0958	RVBD_0958			magnesium chelatase
gi|561108321|ref|NC_018143.2|	1071258	1073277	+	RVBD_0959	105	77	0	0		YP_006514316.1	Rv0959	RVBD_0959			hypothetical protein
gi|561108321|ref|NC_018143.2|	1073330	1073552	+	RVBD_0959A	30	42	2	0		YP_006514317.1	Rv0959A	RVBD_0959A			antitoxin VapB9
gi|561108321|ref|NC_018143.2|	1073548	1073932	+	RVBD_0960	1053	805	2	0		YP_006514318.1	Rv0960	RVBD_0960			toxin VapC9
gi|561108321|ref|NC_018143.2|	1074077	1074425	+	RVBD_0961	185	198	0	1		YP_006514319.1	Rv0961	RVBD_0961			membrane protein
gi|561108321|ref|NC_018143.2|	1074443	1075118	-	RVBD_0962c	102	127	0	0		YP_006514320.1	Rv0962c	RVBD_0962c			lipoprotein LprP
gi|561108321|ref|NC_018143.2|	1075300	1076101	-	RVBD_0963c	155	202	26	28		YP_006514322.1	Rv0963c	RVBD_0963c			hypothetical protein
gi|561108321|ref|NC_018143.2|	1076199	1076682	-	RVBD_0964c	1	0	0	0		YP_006514323.1	Rv0964c	RVBD_0964c			hypothetical protein
gi|561108321|ref|NC_018143.2|	1076781	1077201	-	RVBD_0965c	314	290	0	1		YP_006514324.1	Rv0965c	RVBD_0965c			hypothetical protein
gi|561108321|ref|NC_018143.2|	1077236	1077839	-	RVBD_0966c	114	122	1	2		YP_006514325.1	Rv0966c	RVBD_0966c			hypothetical protein
gi|561108321|ref|NC_018143.2|	1077978	1078338	+	RVBD_0967	15	54	2	1		YP_006514326.1	Rv0967	RVBD_0967			copper-sensing transcriptional repressor CsoR
gi|561108321|ref|NC_018143.2|	1078394	1078691	+	RVBD_0968	3024	2298	11	14		YP_006514327.1	Rv0968	RVBD_0968			hypothetical protein
gi|561108321|ref|NC_018143.2|	1078746	1081059	+	RVBD_0969	1561	1237	2	7		YP_006514328.1	Rv0969	RVBD_0969			metal cation transporter P-type ATPase CtpV
gi|561108321|ref|NC_018143.2|	1081055	1081688	+	RVBD_0970	165	93	0	0		YP_006514329.1	Rv0970	RVBD_0970			integral membrane protein
gi|561108321|ref|NC_018143.2|	1081778	1082588	-	RVBD_0971c	45	29	0	0		YP_006514330.1	Rv0971c	RVBD_0971c			enoyl-CoA hydratase EchA7
gi|561108321|ref|NC_018143.2|	1082587	1083754	-	RVBD_0972c	1358	987	6	10		YP_006514331.1	Rv0972c	RVBD_0972c			acyl-CoA dehydrogenase FadE12
gi|561108321|ref|NC_018143.2|	1083750	1085754	-	RVBD_0973c	53	37	3	1		YP_006514332.1	Rv0973c	RVBD_0973c			acetyl-/propionyl-coenzyme A carboxylase alpha chain alpha subunit AccA2
gi|561108321|ref|NC_018143.2|	1085759	1087349	-	RVBD_0974c	5	4	0	0		YP_006514333.1	Rv0974c	RVBD_0974c			acetyl-/propionyl-CoA carboxylase beta subunit AccD2
gi|561108321|ref|NC_018143.2|	1087351	1088500	-	RVBD_0975c	162	164	0	0		YP_006514334.1	Rv0975c	RVBD_0975c			acyl-CoA dehydrogenase FadE13
gi|561108321|ref|NC_018143.2|	1088496	1090179	-	RVBD_0976c	343	225	1	0		YP_006514335.1	Rv0976c	RVBD_0976c			hypothetical protein
gi|561108321|ref|NC_018143.2|	1090376	1093148	+	RVBD_0977	6999	4523	17	14		YP_006514336.1	Rv0977	RVBD_0977			PE-PGRS family protein PE_PGRS16
gi|561108321|ref|NC_018143.2|	1093364	1094360	-	RVBD_0978c	3147	2337	5	9		YP_006514337.1	Rv0978c	RVBD_0978c			PE-PGRS family protein PE_PGRS17
gi|561108321|ref|NC_018143.2|	1094889	1095063	+	RVBD_0979A	11	11	0	1		YP_006514339.1	Rv0979A	RVBD_0979A			50S ribosomal protein L32 RpmF
gi|561108321|ref|NC_018143.2|	1094673	1094868	-	RVBD_0979c	0	0	0	0		YP_006514338.1	Rv0979c	RVBD_0979c			hypothetical protein
gi|561108321|ref|NC_018143.2|	1095081	1096455	-	RVBD_0980c	1456	956	5	8		YP_006514340.1	Rv0980c	RVBD_0980c			PE-PGRS family protein PE_PGRS18
gi|561108321|ref|NC_018143.2|	1096825	1097512	+	RVBD_0981	826	667	0	0		YP_006514341.2	Rv0981	RVBD_0981			mycobacterial persistence regulator MRPA
gi|561108321|ref|NC_018143.2|	1097511	1099026	+	RVBD_0982	983	900	3	5		YP_006514342.1	Rv0982	RVBD_0982			two-component system sensor histidine kinase MprB
gi|561108321|ref|NC_018143.2|	1099069	1100464	+	RVBD_0983	859	938	1	2		YP_006514343.1	Rv0983	RVBD_0983			serine protease PepD
gi|561108321|ref|NC_018143.2|	1100463	1101009	+	RVBD_0984	823	832	2	0		YP_006514344.1	Rv0984	RVBD_0984			pterin-4-alpha-carbinolamine dehydratase MoaB2
gi|561108321|ref|NC_018143.2|	1101028	1101484	-	RVBD_0985c	228	206	0	0		YP_006514345.1	Rv0985c	RVBD_0985c			large-conductance mechanosensitive channel MscL
gi|561108321|ref|NC_018143.2|	1101806	1102553	+	RVBD_0986	140	169	0	0		YP_006514346.1	Rv0986	RVBD_0986			adhesion component transport ABC transporter ATP-binding protein
gi|561108321|ref|NC_018143.2|	1102545	1105113	+	RVBD_0987	584	864	25	67		YP_006514347.1	Rv0987	RVBD_0987			adhesion component transport ABC transporter transmembrane protein
gi|561108321|ref|NC_018143.2|	1105119	1106280	+	RVBD_0988	856	1139	106	154		YP_006514348.1	Rv0988	RVBD_0988			exported protein
gi|561108321|ref|NC_018143.2|	1106408	1107386	-	RVBD_0989c	23	1039	2	6		YP_006514349.1	Rv0989c	RVBD_0989c			polyprenyl-diphosphate synthase GrcC2
gi|561108321|ref|NC_018143.2|	1107446	1108103	-	RVBD_0990c	131	121	1	1		YP_006514350.1	Rv0990c	RVBD_0990c			hypothetical protein
gi|561108321|ref|NC_018143.2|	1108175	1108508	-	RVBD_0991c	1213	1234	211	278		YP_006514351.1	Rv0991c	RVBD_0991c			serine rich protein
gi|561108321|ref|NC_018143.2|	1108581	1109175	-	RVBD_0992c	268	466	36	30		YP_006514352.1	Rv0992c	RVBD_0992c			5-formyltetrahydrofolate cyclo-ligase
gi|561108321|ref|NC_018143.2|	1109275	1110196	+	RVBD_0993	0	1	0	0		YP_006514353.1	Rv0993	RVBD_0993			glucose-1-phosphate uridylyltransferase GalU
gi|561108321|ref|NC_018143.2|	1110272	1111553	+	RVBD_0994	427	302	0	0		YP_006514354.1	Rv0994	RVBD_0994			molybdopterin biosynthesis protein MoeA1
gi|561108321|ref|NC_018143.2|	1111615	1112227	+	RVBD_0995	30	62	0	1		YP_006514355.1	Rv0995	RVBD_0995			ribosomal-protein-alanine acetyltransferase RimJ
gi|561108321|ref|NC_018143.2|	1112387	1113464	+	RVBD_0996	42	116	1	0		YP_006514356.1	Rv0996	RVBD_0996			transmembrane protein
gi|561108321|ref|NC_018143.2|	1114296	1114728	+	RVBD_0997	159	152	7	10		YP_006514358.1	Rv0997	RVBD_0997			hypothetical protein
gi|561108321|ref|NC_018143.2|	1114751	1115753	+	RVBD_0998	46	56	1	2		YP_006514359.1	Rv0998	RVBD_0998			hypothetical protein
gi|561108321|ref|NC_018143.2|	1115770	1116529	+	RVBD_0999	752	727	0	0		YP_006514360.1	Rv0999	RVBD_0999			hypothetical protein
gi|561108321|ref|NC_018143.2|	1116534	1117152	-	RVBD_1000c	1461	1703	8	4		YP_006514361.1	Rv1000c	RVBD_1000c			hypothetical protein
gi|561108321|ref|NC_018143.2|	1117188	1118397	+	RVBD_1001	1520	1711	4	6		YP_006514362.1	Rv1001	RVBD_1001			arginine deiminase ArcA
gi|561108321|ref|NC_018143.2|	1118431	1119943	-	RVBD_1002c	3	1	0	0		YP_006514363.1	Rv1002c	RVBD_1002c			protein O-mannosyltransferase
gi|561108321|ref|NC_018143.2|	1120025	1120883	+	RVBD_1003	66	35	0	0		YP_006514364.1	Rv1003	RVBD_1003			ribosomal RNA small subunit methyltransferase I
gi|561108321|ref|NC_018143.2|	1120892	1122152	-	RVBD_1004c	96	66	0	0		YP_006514365.1	Rv1004c	RVBD_1004c			membrane protein
gi|561108321|ref|NC_018143.2|	1122225	1123602	-	RVBD_1005c	179	131	0	0		YP_006514366.1	Rv1005c	RVBD_1005c			para-aminobenzoate synthase component I PABD
gi|561108321|ref|NC_018143.2|	1123717	1125421	+	RVBD_1006	795	1113	0	0		YP_006514367.1	Rv1006	RVBD_1006			hypothetical protein
gi|561108321|ref|NC_018143.2|	1125447	1127007	-	RVBD_1007c	43	53	1	1		YP_006514368.1	Rv1007c	RVBD_1007c			methionyl-tRNA synthetase MetS
gi|561108321|ref|NC_018143.2|	1127092	1127887	+	RVBD_1008	323	275	0	0		YP_006514369.1	Rv1008	RVBD_1008			deoxyribonuclease TatD
gi|561108321|ref|NC_018143.2|	1128094	1129183	+	RVBD_1009	159	241	0	0		YP_006514370.1	Rv1009	RVBD_1009			resuscitation-promoting factor RpfB
gi|561108321|ref|NC_018143.2|	1129155	1130109	+	RVBD_1010	31	48	0	0		YP_006514371.1	Rv1010	RVBD_1010			ribosomal RNA small subunit methyltransferase A
gi|561108321|ref|NC_018143.2|	1130194	1131115	+	RVBD_1011	0	0	1	0		YP_006514372.1	Rv1011	RVBD_1011			4-diphosphocytidyl-2-C-methyl-D-erythritol kinase IspE
gi|561108321|ref|NC_018143.2|	1131131	1131425	+	RVBD_1012	147	132	75	93		YP_006514373.1	Rv1012	RVBD_1012			hypothetical protein
gi|561108321|ref|NC_018143.2|	1131628	1133263	+	RVBD_1013	2214	3203	91	126		YP_006514374.1	Rv1013	RVBD_1013			polyketide synthase Pks16
gi|561108321|ref|NC_018143.2|	1133336	1133912	-	RVBD_1014c	0	0	0	0		YP_006514375.1	Rv1014c	RVBD_1014c			peptidyl-tRNA hydrolase Pth
gi|561108321|ref|NC_018143.2|	1133924	1134572	-	RVBD_1015c	33	62	0	0		YP_006514376.1	Rv1015c	RVBD_1015c			50S ribosomal protein L25 RplY
gi|561108321|ref|NC_018143.2|	1134788	1135469	-	RVBD_1016c	262	335	1	4		YP_006514377.1	Rv1016c	RVBD_1016c			lipoprotein LpqT
gi|561108321|ref|NC_018143.2|	1135504	1136485	-	RVBD_1017c	34	52	0	0		YP_006514378.1	Rv1017c	RVBD_1017c			ribose-phosphate pyrophosphokinase PrsA
gi|561108321|ref|NC_018143.2|	1136576	1138064	-	RVBD_1018c	2	0	1	0		YP_006514379.1	Rv1018c	RVBD_1018c			UDP-N-acetylglucosamine pyrophosphorylase GlmU
gi|561108321|ref|NC_018143.2|	1138318	1138912	+	RVBD_1019	110	112	0	0		YP_006514380.1	Rv1019	RVBD_1019			transcriptional regulator TetR-family
gi|561108321|ref|NC_018143.2|	1138970	1142675	+	RVBD_1020	523	490	1	4		YP_006514381.1	Rv1020	RVBD_1020			transcription-repair coupling factor Mfd
gi|561108321|ref|NC_018143.2|	1142674	1143652	+	RVBD_1021	73	56	0	0		YP_006514382.1	Rv1021	RVBD_1021			nucleoside triphosphate pyrophosphohydrolase
gi|561108321|ref|NC_018143.2|	1143739	1144471	+	RVBD_1022	67	72	1	0		YP_006514383.1	Rv1022	RVBD_1022			lipoprotein LpqU
gi|561108321|ref|NC_018143.2|	1144567	1145857	+	RVBD_1023	0	7	0	1		YP_006514384.1	Rv1023	RVBD_1023			enolase Eno
gi|561108321|ref|NC_018143.2|	1145861	1146548	+	RVBD_1024	1	0	0	0		YP_006514385.1	Rv1024	RVBD_1024			cell division protein DivIC
gi|561108321|ref|NC_018143.2|	1146564	1147032	+	RVBD_1025	0	0	0	0		YP_006514386.1	Rv1025	RVBD_1025			hypothetical protein
gi|561108321|ref|NC_018143.2|	1147022	1147982	+	RVBD_1026	21	20	0	0		YP_006514387.1	Rv1026	RVBD_1026			exopolyphosphatase
gi|561108321|ref|NC_018143.2|	1148430	1149111	-	RVBD_1027c	24	25	0	0		YP_006514389.1	Rv1027c	RVBD_1027c			potassium-transporting transcriptional regulator KdpE
				RVBD_1028A	0	0	0	0		YP_006514391.1	Rv1028A	RVBD_1028A			potassium-transporting membrane protein KdpF
gi|561108321|ref|NC_018143.2|	1149107	1151690	-	RVBD_1028c	201	161	1	2		YP_006514390.1	Rv1028c	RVBD_1028c			potassium channel sensor histidine kinase KdpD
gi|561108321|ref|NC_018143.2|	1152015	1153731	+	RVBD_1029	218	279	2	2		YP_006514392.1	Rv1029	RVBD_1029			potassium-transporting P-type ATPase A chain KdpA
gi|561108321|ref|NC_018143.2|	1153727	1155857	+	RVBD_1030	561	702	0	0		YP_006514393.1	Rv1030	RVBD_1030			potassium-transporting P-type ATPase B chain KdpB
gi|561108321|ref|NC_018143.2|	1155856	1156426	+	RVBD_1031	27	116	0	0		YP_006514394.1	Rv1031	RVBD_1031			potassium-transporting P-type ATPase C chain KdpC
gi|561108321|ref|NC_018143.2|	1156429	1157959	-	RVBD_1032c	288	377	1	1		YP_006514395.1	Rv1032c	RVBD_1032c			two-component system sensor histidine kinase TrcS
gi|561108321|ref|NC_018143.2|	1157966	1158740	-	RVBD_1033c	766	880	0	3		YP_006514396.1	Rv1033c	RVBD_1033c			two-component system transcriptional regulator TrcR
gi|561108321|ref|NC_018143.2|	1158921	1159311	-	RVBD_1034c	63	52	0	0		YP_006514397.2	Rv1034c	RVBD_1034c			transposase
gi|561108321|ref|NC_018143.2|	1159378	1160065	-	RVBD_1035c	78	41	0	0		YP_006514398.1	Rv1035c	RVBD_1035c			transposase
gi|561108321|ref|NC_018143.2|	1160098	1160437	-	RVBD_1036c	56	40	0	0		YP_006514399.1	Rv1036c	RVBD_1036c			transposase
gi|561108321|ref|NC_018143.2|	1160547	1160832	-	RVBD_1037c	1366	1315	0	1		YP_006514400.1	Rv1037c	RVBD_1037c			ESAT-6 like protein EsxI
gi|561108321|ref|NC_018143.2|	1160858	1161155	-	RVBD_1038c	75	69	0	0		YP_006514401.1	Rv1038c	RVBD_1038c			ESAT-6 like protein EsxJ
gi|561108321|ref|NC_018143.2|	1161300	1162476	-	RVBD_1039c	1194	1029	4	4		YP_006514402.1	Rv1039c	RVBD_1039c			PPE family protein PPE15
gi|561108321|ref|NC_018143.2|	1162552	1163380	-	RVBD_1040c	527	603	6	3		YP_006514403.1	Rv1040c	RVBD_1040c			PE family protein PE8
gi|561108321|ref|NC_018143.2|	1164575	1165439	-	RVBD_1041c	127	245	0	0		YP_006514405.1	Rv1041c	RVBD_1041c			transposase
gi|561108321|ref|NC_018143.2|	1165095	1165503	-	RVBD_1042c	56	98	0	0		YP_008855183.1	Rv1042c	RVBD_1042c			transposase
gi|561108321|ref|NC_018143.2|	1165784	1166810	-	RVBD_1043c	243	369	11	12		YP_006514406.1	Rv1043c	RVBD_1043c			hypothetical protein
gi|561108321|ref|NC_018143.2|	1167056	1167680	+	RVBD_1044	167	242	0	0		YP_006514407.1	Rv1044	RVBD_1044			hypothetical protein
gi|561108321|ref|NC_018143.2|	1167676	1168558	+	RVBD_1045	206	297	3	5		YP_006514408.1	Rv1045	RVBD_1045			hypothetical protein
gi|561108321|ref|NC_018143.2|	1168639	1169233	-	RVBD_1046c	132	235	0	0		YP_006514409.1	Rv1046c	RVBD_1046c			hypothetical protein
gi|561108321|ref|NC_018143.2|	1169427	1170675	+	RVBD_1047	476	539	10	5		YP_006514410.1	Rv1047	RVBD_1047			transposase
gi|561108321|ref|NC_018143.2|	1171042	1172158	-	RVBD_1048c	1273	1580	0	3		YP_006514411.1	Rv1048c	RVBD_1048c			hypothetical protein
gi|561108321|ref|NC_018143.2|	1172390	1172837	+	RVBD_1049	103	123	0	0		YP_006514413.1	Rv1049	RVBD_1049			transcriptional repressor
gi|561108321|ref|NC_018143.2|	1172885	1173791	+	RVBD_1050	78	81	0	1		YP_006514414.1	Rv1050	RVBD_1050			oxidoreductase
gi|561108321|ref|NC_018143.2|	1173949	1174705	-	RVBD_1051c	41	32	0	0		YP_006514415.1	Rv1051c	RVBD_1051c			hypothetical protein
gi|561108321|ref|NC_018143.2|	1175727	1176117	+	RVBD_1052	182	220	1	2		YP_006514417.1	Rv1052	RVBD_1052			hypothetical protein
gi|561108321|ref|NC_018143.2|	1176015	1176291	-	RVBD_1053c	169	200	1	2		YP_006514418.1	Rv1053c	RVBD_1053c			hypothetical protein
gi|561108321|ref|NC_018143.2|	1176932	1177247	+	RVBD_1054	1	2	0	0		YP_006514420.1	Rv1054	RVBD_1054			integrase
gi|561108321|ref|NC_018143.2|	1177243	1177378	+	RVBD_1055	0	0	0	0		YP_006514421.1	Rv1055	RVBD_1055			integrase
gi|561108321|ref|NC_018143.2|	1177632	1178397	+	RVBD_1056	1325	1675	4	5		YP_006514422.1	Rv1056	RVBD_1056			hypothetical protein
gi|561108321|ref|NC_018143.2|	1179400	1180582	+	RVBD_1057	1617	1754	5	6		YP_006514423.1	Rv1057	RVBD_1057			hypothetical protein
gi|561108321|ref|NC_018143.2|	1180688	1182320	+	RVBD_1058	108	147	2	3		YP_006514424.1	Rv1058	RVBD_1058			fatty-acid-CoA ligase FadD14
gi|561108321|ref|NC_018143.2|	1182395	1183460	+	RVBD_1059	18	45	0	0		YP_006514425.1	Rv1059	RVBD_1059			dihydrodipicolinate reductase
gi|561108321|ref|NC_018143.2|	1183512	1183986	+	RVBD_1060	0	0	0	0		YP_006514426.1	Rv1060	RVBD_1060			hypothetical protein
gi|561108321|ref|NC_018143.2|	1184019	1184883	+	RVBD_1061	809	736	1	2		YP_006514427.1	Rv1061	RVBD_1061			hypothetical protein
gi|561108321|ref|NC_018143.2|	1184887	1185745	+	RVBD_1062	7	47	0	1		YP_006514428.1	Rv1062	RVBD_1062			hypothetical protein
gi|561108321|ref|NC_018143.2|	1185745	1186828	-	RVBD_1063c	179	144	0	0		YP_006514429.1	Rv1063c	RVBD_1063c			hypothetical protein
gi|561108321|ref|NC_018143.2|	1186908	1187328	-	RVBD_1064c	843	621	4	4		YP_006514430.1	Rv1064c	RVBD_1064c			lipoprotein LpqV
gi|561108321|ref|NC_018143.2|	1187439	1188006	+	RVBD_1065	242	175	3	2		YP_006514431.1	Rv1065	RVBD_1065			hypothetical protein
gi|561108321|ref|NC_018143.2|	1188002	1188398	+	RVBD_1066	32	29	0	0		YP_006514432.1	Rv1066	RVBD_1066			hypothetical protein
gi|561108321|ref|NC_018143.2|	1188425	1190429	-	RVBD_1067c	344	216	1	2		YP_006514433.1	Rv1067c	RVBD_1067c			PE-PGRS family protein PE_PGRS19
gi|561108321|ref|NC_018143.2|	1190761	1192153	-	RVBD_1068c	661	423	3	3		YP_006514434.1	Rv1068c	RVBD_1068c			PE-PGRS family protein PE_PGRS20
gi|561108321|ref|NC_018143.2|	1192514	1194278	-	RVBD_1069c	3695	4155	17	11		YP_006514436.1	Rv1069c	RVBD_1069c			hypothetical protein
gi|561108321|ref|NC_018143.2|	1194274	1195048	-	RVBD_1070c	98	119	2	2		YP_006514437.1	Rv1070c	RVBD_1070c			enoyl-CoA hydratase EchA8
gi|561108321|ref|NC_018143.2|	1195059	1196097	-	RVBD_1071c	636	660	3	4		YP_006514438.1	Rv1071c	RVBD_1071c			enoyl-CoA hydratase EchA9
gi|561108321|ref|NC_018143.2|	1196283	1197120	+	RVBD_1072	37	182	0	0		YP_006514439.1	Rv1072	RVBD_1072			transmembrane protein
gi|561108321|ref|NC_018143.2|	1197235	1198087	+	RVBD_1073	552	816	0	0		YP_006514440.1	Rv1073	RVBD_1073			hypothetical protein
gi|561108321|ref|NC_018143.2|	1198160	1199378	-	RVBD_1074c	933	1083	3	3		YP_006514441.1	Rv1074c	RVBD_1074c			beta-ketoacyl CoA thiolase FadA3
gi|561108321|ref|NC_018143.2|	1199430	1200375	-	RVBD_1075c	896	1091	0	1		YP_006514442.1	Rv1075c	RVBD_1075c			exported protein
gi|561108321|ref|NC_018143.2|	1200771	1201665	+	RVBD_1076	360	383	0	4		YP_006514443.1	Rv1076	RVBD_1076			lipase LipU
gi|561108321|ref|NC_018143.2|	1201721	1203116	+	RVBD_1077	560	610	3	3		YP_006514444.1	Rv1077	RVBD_1077			cystathionine beta-synthase Cbs
gi|561108321|ref|NC_018143.2|	1203317	1204040	+	RVBD_1078	1159	830	1	0		YP_006514445.1	Rv1078	RVBD_1078			proline rich antigen Pra
gi|561108321|ref|NC_018143.2|	1204071	1205238	+	RVBD_1079	2242	1781	0	2		YP_006514446.1	Rv1079	RVBD_1079			cystathionine gamma-synthase MetB
gi|561108321|ref|NC_018143.2|	1205308	1205803	-	RVBD_1080c	62	73	0	0		YP_006514447.1	Rv1080c	RVBD_1080c			transcription elongation factor GreA
gi|561108321|ref|NC_018143.2|	1205988	1206423	-	RVBD_1081c	1	12	0	0		YP_006514448.1	Rv1081c	RVBD_1081c			membrane protein
gi|561108321|ref|NC_018143.2|	1206524	1207391	+	RVBD_1082	218	347	2	2		YP_006514449.1	Rv1082	RVBD_1082			mycothiol conjugate amidase Mca
gi|561108321|ref|NC_018143.2|	1207387	1207654	+	RVBD_1083	30	64	0	0		YP_006514450.1	Rv1083	RVBD_1083			hypothetical protein
gi|561108321|ref|NC_018143.2|	1207640	1209662	+	RVBD_1084	471	439	0	0		YP_006514451.1	Rv1084	RVBD_1084			hypothetical protein
gi|561108321|ref|NC_018143.2|	1209760	1210489	-	RVBD_1085c	620	422	0	0		YP_006514452.1	Rv1085c	RVBD_1085c			hemolysin-like protein
gi|561108321|ref|NC_018143.2|	1210599	1211388	+	RVBD_1086	763	576	1	1		YP_006514453.1	Rv1086	RVBD_1086			short-chain Z-isoprenyl diphosphate synthase
gi|561108321|ref|NC_018143.2|	1211564	1213868	+	RVBD_1087	457	296	3	1		YP_006514454.1	Rv1087	RVBD_1087			PE-PGRS family protein PE_PGRS21
gi|561108321|ref|NC_018143.2|	1214044	1214365	+	RVBD_1087A	168	263	5	6		YP_006514455.1	Rv1087A	RVBD_1087A			short-chain Z-isoprenyl diphosphate synthase
gi|561108321|ref|NC_018143.2|	1214517	1214952	+	RVBD_1088	719	567	2	1		YP_006514456.1	Rv1088	RVBD_1088			PE family protein PE9
gi|561108321|ref|NC_018143.2|	1214830	1215136	+	RVBD_1089	0	0	0	0		YP_006514457.1	Rv1089	RVBD_1089			PE family protein PE10
gi|561108321|ref|NC_018143.2|	1215521	1215626	+	RVBD_1089A	74	72	4	1		YP_006514458.1	Rv1089A	RVBD_1089A			cellulase CelA2a
gi|561108321|ref|NC_018143.2|	1215603	1216059	+	RVBD_1090	1629	1271	9	11		YP_006514459.1	Rv1090	RVBD_1090			cellulase CelA2b
gi|561108321|ref|NC_018143.2|	1216473	1219035	+	RVBD_1091	341	201	0	5		YP_006514460.1	Rv1091	RVBD_1091			PE-PGRS family protein PE_PGRS22
gi|561108321|ref|NC_018143.2|	1219252	1220191	-	RVBD_1092c	30	29	0	0		YP_006514461.1	Rv1092c	RVBD_1092c			pantothenate kinase CoaA
gi|561108321|ref|NC_018143.2|	1220578	1221859	+	RVBD_1093	15	24	0	0		YP_006514462.1	Rv1093	RVBD_1093			serine hydroxymethyltransferase 1 GlyA1
gi|561108321|ref|NC_018143.2|	1221963	1222791	+	RVBD_1094	78	74	0	0		YP_006514463.1	Rv1094	RVBD_1094			acyl carrier protein desaturase DesA2
gi|561108321|ref|NC_018143.2|	1223001	1224303	+	RVBD_1095	84	108	0	0		YP_006514464.1	Rv1095	RVBD_1095			PHOH-like protein PhoH2
gi|561108321|ref|NC_018143.2|	1224389	1225265	+	RVBD_1096	28	119	0	0		YP_006514465.1	Rv1096	RVBD_1096			glycosyl hydrolase
gi|561108321|ref|NC_018143.2|	1225267	1226149	-	RVBD_1097c	211	284	0	1		YP_006514466.1	Rv1097c	RVBD_1097c			glycine and proline rich membrane protein
gi|561108321|ref|NC_018143.2|	1226145	1227570	-	RVBD_1098c	19	25	0	0		YP_006514467.1	Rv1098c	RVBD_1098c			fumarase Fum
gi|561108321|ref|NC_018143.2|	1227600	1228689	-	RVBD_1099c	76	132	2	1		YP_006514468.1	Rv1099c	RVBD_1099c			fructose 1
gi|561108321|ref|NC_018143.2|	1228687	1229389	+	RVBD_1100	2	12	0	0		YP_006514469.1	Rv1100	RVBD_1100			hypothetical protein
gi|561108321|ref|NC_018143.2|	1229395	1230553	-	RVBD_1101c	852	733	9	5		YP_006514470.1	Rv1101c	RVBD_1101c			membrane protein
gi|561108321|ref|NC_018143.2|	1230664	1230976	-	RVBD_1102c	474	524	0	0		YP_006514471.1	Rv1102c	RVBD_1102c			toxin MazF3
gi|561108321|ref|NC_018143.2|	1230975	1231296	-	RVBD_1103c	1357	1487	1	1		YP_006514472.1	Rv1103c	RVBD_1103c			antitoxin MazE3
gi|561108321|ref|NC_018143.2|	1231305	1231995	+	RVBD_1104	1326	1479	1	1		YP_006514473.1	Rv1104	RVBD_1104			esterase/lipase
gi|561108321|ref|NC_018143.2|	1232315	1232831	+	RVBD_1105	163	173	4	4		YP_006514474.1	Rv1105	RVBD_1105			esterase/lipase
gi|561108321|ref|NC_018143.2|	1232848	1233961	-	RVBD_1106c	661	695	11	4		YP_006514475.1	Rv1106c	RVBD_1106c			3-beta-hydroxysteroid dehydrogenase
gi|561108321|ref|NC_018143.2|	1233970	1234228	-	RVBD_1107c	87	96	0	0		YP_006514476.1	Rv1107c	RVBD_1107c			exodeoxyribonuclease VII small subunit XseB
gi|561108321|ref|NC_018143.2|	1234217	1235465	-	RVBD_1108c	26	30	0	0		YP_006514477.1	Rv1108c	RVBD_1108c			exodeoxyribonuclease VII large subunit XseA
gi|561108321|ref|NC_018143.2|	1235461	1236100	-	RVBD_1109c	312	308	1	4		YP_006514478.1	Rv1109c	RVBD_1109c			hypothetical protein
gi|561108321|ref|NC_018143.2|	1236189	1237197	+	RVBD_1110	12	16	0	0		YP_006514479.1	Rv1110	RVBD_1110			LYTB2 protein
gi|561108321|ref|NC_018143.2|	1237213	1238197	-	RVBD_1111c	748	840	11	17		YP_006514480.1	Rv1111c	RVBD_1111c			hypothetical protein
gi|561108321|ref|NC_018143.2|	1238259	1239333	+	RVBD_1112	11	11	0	1		YP_006514481.1	Rv1112	RVBD_1112			GTP-binding protein YchF
gi|561108321|ref|NC_018143.2|	1239420	1239618	+	RVBD_1113	34	56	0	0		YP_006514482.1	Rv1113	RVBD_1113			antitoxin VapB32
gi|561108321|ref|NC_018143.2|	1239614	1239989	+	RVBD_1114	99	116	0	0		YP_006514483.1	Rv1114	RVBD_1114			toxin VapC32
gi|561108321|ref|NC_018143.2|	1240191	1240890	+	RVBD_1115	749	853	0	2		YP_006514484.1	Rv1115	RVBD_1115			exported protein
gi|561108321|ref|NC_018143.2|	1241007	1241193	+	RVBD_1116	5	4	0	0		YP_006514485.1	Rv1116	RVBD_1116			hypothetical protein
gi|561108321|ref|NC_018143.2|	1241119	1241395	-	RVBD_1116A	82	171	1	4		YP_006514486.1	Rv1116A	RVBD_1116A			hypothetical protein
gi|561108321|ref|NC_018143.2|	1241637	1241961	+	RVBD_1117	143	138	0	0		YP_006514487.1	Rv1117	RVBD_1117			hypothetical protein
gi|561108321|ref|NC_018143.2|	1241975	1242836	-	RVBD_1118c	530	534	0	1		YP_006514488.1	Rv1118c	RVBD_1118c			hypothetical protein
gi|561108321|ref|NC_018143.2|	1242868	1243018	-	RVBD_1119c	0	1	0	0		YP_006514489.1	Rv1119c	RVBD_1119c			hypothetical protein
gi|561108321|ref|NC_018143.2|	1243014	1243509	-	RVBD_1120c	144	118	0	0		YP_006514490.1	Rv1120c	RVBD_1120c			hypothetical protein
gi|561108321|ref|NC_018143.2|	1243711	1245112	+	RVBD_1121	34	43	0	2		YP_006514491.1	Rv1121	RVBD_1121			glucose-6-phosphate 1-dehydrogenase Zwf1
gi|561108321|ref|NC_018143.2|	1245133	1246156	+	RVBD_1122	2	2	0	0		YP_006514492.1	Rv1122	RVBD_1122			6-phosphogluconate dehydrogenase
gi|561108321|ref|NC_018143.2|	1246148	1247057	-	RVBD_1123c	47	88	1	1		YP_006514493.1	Rv1123c	RVBD_1123c			peroxidase BpoB
gi|561108321|ref|NC_018143.2|	1247131	1248082	+	RVBD_1124	1858	1486	3	5		YP_006514494.1	Rv1124	RVBD_1124			epoxide hydrolase EphC
gi|561108321|ref|NC_018143.2|	1248086	1249331	+	RVBD_1125	87	81	0	0		YP_006514495.1	Rv1125	RVBD_1125			hypothetical protein
gi|561108321|ref|NC_018143.2|	1249334	1249940	-	RVBD_1126c	1	0	0	0		YP_006514496.1	Rv1126c	RVBD_1126c			hypothetical protein
gi|561108321|ref|NC_018143.2|	1249936	1251409	-	RVBD_1127c	99	124	0	0		YP_006514497.1	Rv1127c	RVBD_1127c			pyruvate
gi|561108321|ref|NC_018143.2|	1251621	1252977	-	RVBD_1128c	122	170	0	0		YP_006514498.1	Rv1128c	RVBD_1128c			hypothetical protein
gi|561108321|ref|NC_018143.2|	1253078	1254539	-	RVBD_1129c	90	161	0	2		YP_006514499.1	Rv1129c	RVBD_1129c			transcriptional regulator
gi|561108321|ref|NC_018143.2|	1254559	1256140	+	RVBD_1130	614	834	1	2		YP_006514500.1	Rv1130	RVBD_1130			2-methylcitrate dehydratase PrpD
gi|561108321|ref|NC_018143.2|	1256136	1257318	+	RVBD_1131	186	254	1	0		YP_006514501.1	Rv1131	RVBD_1131			methylcitrate synthase PrpC
gi|561108321|ref|NC_018143.2|	1257329	1259060	+	RVBD_1132	264	304	3	2		YP_006514502.1	Rv1132	RVBD_1132			hypothetical protein
gi|561108321|ref|NC_018143.2|	1259071	1261351	-	RVBD_1133c	4	1	0	0		YP_006514503.1	Rv1133c	RVBD_1133c			5-methyltetrahydropteroyltriglutamate-homocysteine methyltransferase MetE
gi|561108321|ref|NC_018143.2|	1261926	1262163	+	RVBD_1134	16	32	5	7		YP_006514504.1	Rv1134	RVBD_1134			hypothetical protein
gi|561108321|ref|NC_018143.2|	1264318	1264561	+	RVBD_1135A	13	13	0	1		YP_006514506.1	Rv1135A	RVBD_1135A			acetyl-CoA acetyltransferase
gi|561108321|ref|NC_018143.2|	1262276	1264133	-	RVBD_1135c	1067	975	5	8		YP_006514505.1	Rv1135c	RVBD_1135c			PPE family protein PPE16
gi|561108321|ref|NC_018143.2|	1264610	1264952	+	RVBD_1136	74	69	0	0		YP_006514507.1	Rv1136	RVBD_1136			enoyl-CoA hydratase
gi|561108321|ref|NC_018143.2|	1265091	1265460	-	RVBD_1137c	22	8	0	0		YP_006514508.1	Rv1137c	RVBD_1137c			hypothetical protein
gi|561108321|ref|NC_018143.2|	1265476	1266493	-	RVBD_1138c	871	1061	3	5		YP_006514509.1	Rv1138c	RVBD_1138c			oxidoreductase
gi|561108321|ref|NC_018143.2|	1266489	1266990	-	RVBD_1139c	755	1004	5	3		YP_006514510.1	Rv1139c	RVBD_1139c			hypothetical protein
gi|561108321|ref|NC_018143.2|	1267351	1268200	+	RVBD_1140	7	11	0	1		YP_006514512.1	Rv1140	RVBD_1140			membrane protein
gi|561108321|ref|NC_018143.2|	1268207	1269014	-	RVBD_1141c	3316	3571	7	10		YP_006514513.1	Rv1141c	RVBD_1141c			enoyl-CoA hydratase EchA11
gi|561108321|ref|NC_018143.2|	1269156	1269963	-	RVBD_1142c	116	129	3	4		YP_006514514.1	Rv1142c	RVBD_1142c			enoyl-CoA hydratase EchA10
gi|561108321|ref|NC_018143.2|	1270066	1271149	+	RVBD_1143	1003	1288	1	3		YP_006514515.1	Rv1143	RVBD_1143			alpha-methylacyl-CoA racemase Mcr
gi|561108321|ref|NC_018143.2|	1271160	1271913	+	RVBD_1144	766	1065	7	12		YP_006514516.1	Rv1144	RVBD_1144			3-hydroxyacyl-CoA dehydrogenase/3-hydroxy-2-methylbutyryl-CoA dehydrogenase
gi|561108321|ref|NC_018143.2|	1272040	1272196	-	RVBD_1144Ac	65	67	0	0		YP_006514517.1	Rv1144Ac	RVBD_1144Ac			hypothetical protein
gi|561108321|ref|NC_018143.2|	1272427	1273339	+	RVBD_1145	148	138	3	4		YP_006514518.1	Rv1145	RVBD_1145			transmembrane transporter MmpL13a
gi|561108321|ref|NC_018143.2|	1273359	1274772	+	RVBD_1146	618	1002	12	12		YP_006514519.1	Rv1146	RVBD_1146			transmembrane transporter MmpL13b
gi|561108321|ref|NC_018143.2|	1274904	1275555	+	RVBD_1147	893	1064	5	7		YP_006514520.1	Rv1147	RVBD_1147			hypothetical protein
gi|561108321|ref|NC_018143.2|	1276304	1277753	-	RVBD_1148c	176	249	2	4		YP_006514522.1	Rv1148c	RVBD_1148c			hypothetical protein
gi|561108321|ref|NC_018143.2|	1278908	1279622	-	RVBD_1151c	2315	2372	85	100		YP_006514523.1	Rv1151c	RVBD_1151c			transcriptional regulator
gi|561108321|ref|NC_018143.2|	1279659	1280025	+	RVBD_1152	2018	2004	4	5		YP_006514524.1	Rv1152	RVBD_1152			transcriptional regulator
gi|561108321|ref|NC_018143.2|	1280002	1280851	-	RVBD_1153c	234	276	0	0		YP_006514525.1	Rv1153c	RVBD_1153c			O-methyltransferase Omt
gi|561108321|ref|NC_018143.2|	1280847	1281489	-	RVBD_1154c	699	745	110	135		YP_006514526.1	Rv1154c	RVBD_1154c			hypothetical protein
gi|561108321|ref|NC_018143.2|	1281433	1281877	+	RVBD_1155	865	999	2	3		YP_006514527.1	Rv1155	RVBD_1155			pyridoxamine 5'-phosphate oxidase
gi|561108321|ref|NC_018143.2|	1282310	1282898	+	RVBD_1156	222	242	0	0		YP_006514529.1	Rv1156	RVBD_1156			hypothetical protein
gi|561108321|ref|NC_018143.2|	1283060	1284176	-	RVBD_1157c	168	130	0	0		YP_006514531.1	Rv1157c	RVBD_1157c			alanine and proline rich protein
gi|561108321|ref|NC_018143.2|	1284183	1284867	-	RVBD_1158c	45	38	0	0		YP_006514532.1	Rv1158c	RVBD_1158c			alanine and proline rich protein
gi|561108321|ref|NC_018143.2|	1284996	1286292	+	RVBD_1159	34	115	1	0		YP_006514533.1	Rv1159	RVBD_1159			mannosyltransferase PimE
gi|561108321|ref|NC_018143.2|	1286288	1286573	-	RVBD_1159A	1298	1312	5	4		YP_006514534.1	Rv1159A	RVBD_1159A			4a-hydroxytetrahydrobiopterin dehydratase
gi|561108321|ref|NC_018143.2|	1286599	1287025	+	RVBD_1160	192	140	0	3		YP_006514535.1	Rv1160	RVBD_1160			mutator protein MutT2
gi|561108321|ref|NC_018143.2|	1287332	1291031	+	RVBD_1161	564	663	5	0		YP_006514536.1	Rv1161	RVBD_1161			respiratory nitrate reductase alpha chain NarG
gi|561108321|ref|NC_018143.2|	1291069	1292746	+	RVBD_1162	561	749	2	3		YP_006514537.1	Rv1162	RVBD_1162			respiratory nitrate reductase beta chain NarH
gi|561108321|ref|NC_018143.2|	1292802	1293408	+	RVBD_1163	964	900	0	0		YP_006514538.1	Rv1163	RVBD_1163			respiratory nitrate reductase delta chain NarJ
gi|561108321|ref|NC_018143.2|	1293410	1294151	+	RVBD_1164	622	672	5	6		YP_006514539.1	Rv1164	RVBD_1164			respiratory nitrate reductase gamma chain NarI
gi|561108321|ref|NC_018143.2|	1294172	1296059	+	RVBD_1165	821	750	2	1		YP_006514540.1	Rv1165	RVBD_1165			GTP-binding protein TypA/BipA
gi|561108321|ref|NC_018143.2|	1296156	1298064	+	RVBD_1166	8	8	0	0		YP_006514541.1	Rv1166	RVBD_1166			lipoprotein LpqW
gi|561108321|ref|NC_018143.2|	1298091	1298697	-	RVBD_1167c	16	30	0	0		YP_006514542.1	Rv1167c	RVBD_1167c			transcriptional regulator
gi|561108321|ref|NC_018143.2|	1298768	1299809	-	RVBD_1168c	1068	1176	1	0		YP_006514543.1	Rv1168c	RVBD_1168c			PPE family protein PPE17
gi|561108321|ref|NC_018143.2|	1299826	1300129	-	RVBD_1169c	4	3	0	0		YP_006514544.1	Rv1169c	RVBD_1169c			PE family protein lipase LipX
gi|561108321|ref|NC_018143.2|	1300308	1301220	+	RVBD_1170	8	12	1	3		YP_006514545.1	Rv1170	RVBD_1170			1-D-myo-inositol 2-acetamido-2-deoxy-alpha-D-glucopyranoside deacetylase
gi|561108321|ref|NC_018143.2|	1301311	1301752	+	RVBD_1171	885	850	2	1		YP_006514547.1	Rv1171	RVBD_1171			hypothetical protein
gi|561108321|ref|NC_018143.2|	1301759	1302686	-	RVBD_1172c	194	172	2	4		YP_006514548.1	Rv1172c	RVBD_1172c			PE family protein PE12
gi|561108321|ref|NC_018143.2|	1302935	1305506	+	RVBD_1173	1574	1701	0	0		YP_006514549.1	Rv1173	RVBD_1173			F420 biosynthesis protein FbiC
gi|561108321|ref|NC_018143.2|	1305673	1306006	-	RVBD_1174c	7045	6556	12	19		YP_006514550.1	Rv1174c	RVBD_1174c			t-cell antigen
gi|561108321|ref|NC_018143.2|	1306206	1308231	-	RVBD_1175c	3411	3588	1	6		YP_006514551.1	Rv1175c	RVBD_1175c			NADPH dependent 2
gi|561108321|ref|NC_018143.2|	1308227	1308797	-	RVBD_1176c	138	216	4	6		YP_006514552.1	Rv1176c	RVBD_1176c			hypothetical protein
gi|561108321|ref|NC_018143.2|	1309009	1309336	+	RVBD_1177	438	443	0	1		YP_006514553.1	Rv1177	RVBD_1177			ferredoxin FdxC
gi|561108321|ref|NC_018143.2|	1309368	1310457	+	RVBD_1178	122	121	1	4		YP_006514554.1	Rv1178	RVBD_1178			succinyldiaminopimelate transaminase
gi|561108321|ref|NC_018143.2|	1310484	1313304	-	RVBD_1179c	4693	4055	10	7		YP_006514555.1	Rv1179c	RVBD_1179c			hypothetical protein
gi|561108321|ref|NC_018143.2|	1313730	1319988	+	RVBD_1181	188	208	7	1		YP_006514556.1	Rv1181	RVBD_1181			polyketide beta-ketoacyl synthase Pks4
gi|561108321|ref|NC_018143.2|	1320040	1321459	+	RVBD_1182	101	208	0	0		YP_006514557.1	Rv1182	RVBD_1182			polyketide synthase associated protein PapA3
gi|561108321|ref|NC_018143.2|	1321525	1324534	+	RVBD_1183	483	780	0	0		YP_006514558.1	Rv1183	RVBD_1183			transmembrane transporter MmpL10
gi|561108321|ref|NC_018143.2|	1324537	1325617	-	RVBD_1184c	65	108	1	1		YP_006514559.1	Rv1184c	RVBD_1184c			exported protein
gi|561108321|ref|NC_018143.2|	1325781	1327518	-	RVBD_1185c	433	540	1	0		YP_006514560.1	Rv1185c	RVBD_1185c			fatty-acid-AMP ligase FadD21
gi|561108321|ref|NC_018143.2|	1327694	1329311	-	RVBD_1186c	284	232	0	0		YP_006514561.1	Rv1186c	RVBD_1186c			hypothetical protein
gi|561108321|ref|NC_018143.2|	1329395	1331027	+	RVBD_1187	0	0	0	1		YP_006514562.1	Rv1187	RVBD_1187			pyrroline-5-carboxylate dehydrogenase RocA
gi|561108321|ref|NC_018143.2|	1331026	1332016	+	RVBD_1188	65	77	0	0		YP_006514563.1	Rv1188	RVBD_1188			proline dehydrogenase
gi|561108321|ref|NC_018143.2|	1332097	1332970	+	RVBD_1189	1885	1371	14	8		YP_006514564.1	Rv1189	RVBD_1189			sigma-70 family RNA polymerase sigma factor SigI
gi|561108321|ref|NC_018143.2|	1332985	1333864	+	RVBD_1190	242	173	4	4		YP_006514565.1	Rv1190	RVBD_1190			hypothetical protein
gi|561108321|ref|NC_018143.2|	1333936	1334851	+	RVBD_1191	2685	1624	5	1		YP_006514566.1	Rv1191	RVBD_1191			hypothetical protein
gi|561108321|ref|NC_018143.2|	1334932	1335760	+	RVBD_1192	340	227	0	0		YP_006514567.1	Rv1192	RVBD_1192			hypothetical protein
gi|561108321|ref|NC_018143.2|	1335799	1337221	+	RVBD_1193	121	113	2	0		YP_006514568.1	Rv1193	RVBD_1193			fatty-acid-CoA ligase FadD36
gi|561108321|ref|NC_018143.2|	1337253	1338519	-	RVBD_1194c	1889	1741	0	1		YP_006514569.1	Rv1194c	RVBD_1194c			hypothetical protein
gi|561108321|ref|NC_018143.2|	1339008	1339308	+	RVBD_1195	128	118	0	0		YP_006514570.1	Rv1195	RVBD_1195			PE family protein PE13
gi|561108321|ref|NC_018143.2|	1339354	1340530	+	RVBD_1196	1554	1373	4	5		YP_006514571.1	Rv1196	RVBD_1196			PPE family protein PPE18
gi|561108321|ref|NC_018143.2|	1340664	1340961	+	RVBD_1197	490	700	0	0		YP_006514572.1	Rv1197	RVBD_1197			ESAT-6 like protein EsxK
gi|561108321|ref|NC_018143.2|	1341011	1341296	+	RVBD_1198	128	159	1	1		YP_006514573.1	Rv1198	RVBD_1198			ESAT-6 like protein EsxL
gi|561108321|ref|NC_018143.2|	1341363	1342611	-	RVBD_1199c	484	545	4	6		YP_006514574.1	Rv1199c	RVBD_1199c			transposase
gi|561108321|ref|NC_018143.2|	1342947	1344225	+	RVBD_1200	3083	2944	8	5		YP_006514575.1	Rv1200	RVBD_1200			MFS transporter
gi|561108321|ref|NC_018143.2|	1344221	1345175	-	RVBD_1201c	149	150	0	0		YP_006514576.1	Rv1201c	RVBD_1201c			tetrahydrodipicolinate N-succinyltransferase DapD
gi|561108321|ref|NC_018143.2|	1345265	1346330	+	RVBD_1202	37	33	0	0		YP_006514577.1	Rv1202	RVBD_1202			succinyl-diaminopimelate desuccinylase DapE
gi|561108321|ref|NC_018143.2|	1346326	1346911	-	RVBD_1203c	114	135	0	0		YP_006514578.1	Rv1203c	RVBD_1203c			hypothetical protein
gi|561108321|ref|NC_018143.2|	1346941	1348630	-	RVBD_1204c	847	806	5	8		YP_006514579.1	Rv1204c	RVBD_1204c			hypothetical protein
gi|561108321|ref|NC_018143.2|	1348724	1349288	+	RVBD_1205	205	304	9	2		YP_006514580.1	Rv1205	RVBD_1205			hypothetical protein
gi|561108321|ref|NC_018143.2|	1349337	1351131	+	RVBD_1206	2818	2447	1477	1750		YP_006514581.1	Rv1206	RVBD_1206			fatty-acid-CoA ligase FadD6
gi|561108321|ref|NC_018143.2|	1351196	1352153	+	RVBD_1207	135	111	0	0		YP_006514582.1	Rv1207	RVBD_1207			dihydropteroate synthase 2 FolP2
gi|561108321|ref|NC_018143.2|	1352149	1353124	+	RVBD_1208	0	0	1	0		YP_006514583.1	Rv1208	RVBD_1208			glucosyl-3-phosphoglycerate synthase GpgS
gi|561108321|ref|NC_018143.2|	1353162	1353531	+	RVBD_1209	103	99	0	0		YP_006514584.1	Rv1209	RVBD_1209			DivIVA family protein
gi|561108321|ref|NC_018143.2|	1353527	1354142	+	RVBD_1210	444	514	14	24		YP_006514585.1	Rv1210	RVBD_1210			DNA-3-methyladenine glycosylase I TagA
gi|561108321|ref|NC_018143.2|	1354248	1354476	+	RVBD_1211	262	678	6	4		YP_006514586.1	Rv1211	RVBD_1211			hypothetical protein
gi|561108321|ref|NC_018143.2|	1354503	1355667	-	RVBD_1212c	452	932	11	9		YP_006514587.1	Rv1212c	RVBD_1212c			glycosyltransferase GlgA
gi|561108321|ref|NC_018143.2|	1355841	1357056	+	RVBD_1213	659	428	4	5		YP_006514588.1	Rv1213	RVBD_1213			glucose-1-phosphate adenylyltransferase GlgC
gi|561108321|ref|NC_018143.2|	1357298	1357631	-	RVBD_1214c	37	34	0	0		YP_006514589.1	Rv1214c	RVBD_1214c			PE family protein PE14
gi|561108321|ref|NC_018143.2|	1357764	1359450	-	RVBD_1215c	112	137	3	3		YP_006514590.1	Rv1215c	RVBD_1215c			hydrolase
gi|561108321|ref|NC_018143.2|	1359477	1360152	-	RVBD_1216c	1393	1209	2	4		YP_006514591.1	Rv1216c	RVBD_1216c			integral membrane protein
gi|561108321|ref|NC_018143.2|	1360160	1361807	-	RVBD_1217c	127	105	2	1		YP_006514592.1	Rv1217c	RVBD_1217c			antibiotic transporter permease
gi|561108321|ref|NC_018143.2|	1361803	1362739	-	RVBD_1218c	38	25	2	0		YP_006514593.1	Rv1218c	RVBD_1218c			antibiotic transporter ATP-binding protein
gi|561108321|ref|NC_018143.2|	1362728	1363367	-	RVBD_1219c	214	324	0	0		YP_006514594.1	Rv1219c	RVBD_1219c			transcriptional regulator
gi|561108321|ref|NC_018143.2|	1363508	1364156	-	RVBD_1220c	1352	1302	0	0		YP_006514595.1	Rv1220c	RVBD_1220c			methyltransferase
gi|561108321|ref|NC_018143.2|	1364418	1365192	+	RVBD_1221	143	119	0	0		YP_006514596.1	Rv1221	RVBD_1221			RNA polymerase sigma factor SigE
gi|561108321|ref|NC_018143.2|	1365349	1365814	+	RVBD_1222	56	29	1	0		YP_006514597.1	Rv1222	RVBD_1222			anti-sigma factor RseA
gi|561108321|ref|NC_018143.2|	1365880	1367467	+	RVBD_1223	227	181	3	3		YP_006514598.1	Rv1223	RVBD_1223			serine protease HtrA
gi|561108321|ref|NC_018143.2|	1367468	1367864	+	RVBD_1224	68	67	0	0		YP_006514599.1	Rv1224	RVBD_1224			protein TatB
gi|561108321|ref|NC_018143.2|	1367896	1368727	-	RVBD_1225c	1112	830	0	1		YP_006514600.1	Rv1225c	RVBD_1225c			HAD hydrolase
gi|561108321|ref|NC_018143.2|	1368837	1370301	-	RVBD_1226c	295	243	0	2		YP_006514601.1	Rv1226c	RVBD_1226c			transmembrane protein
gi|561108321|ref|NC_018143.2|	1370297	1370831	-	RVBD_1227c	46	38	0	0		YP_006514602.1	Rv1227c	RVBD_1227c			transmembrane protein
gi|561108321|ref|NC_018143.2|	1370925	1371483	+	RVBD_1228	1393	1334	3	5		YP_006514603.1	Rv1228	RVBD_1228			lipoprotein LpqX
gi|561108321|ref|NC_018143.2|	1371782	1372955	-	RVBD_1229c	14	41	0	0		YP_006514604.1	Rv1229c	RVBD_1229c			mrp protein
gi|561108321|ref|NC_018143.2|	1372967	1374203	-	RVBD_1230c	2073	1917	3	0		YP_006514605.1	Rv1230c	RVBD_1230c			membrane protein
gi|561108321|ref|NC_018143.2|	1374327	1374870	-	RVBD_1231c	412	471	0	0		YP_006514606.1	Rv1231c	RVBD_1231c			membrane protein
gi|561108321|ref|NC_018143.2|	1374866	1376174	-	RVBD_1232c	2448	2592	6	5		YP_006514607.1	Rv1232c	RVBD_1232c			hypothetical protein
gi|561108321|ref|NC_018143.2|	1376235	1376832	-	RVBD_1233c	372	416	1	3		YP_006514608.1	Rv1233c	RVBD_1233c			hypothetical protein
gi|561108321|ref|NC_018143.2|	1376981	1377509	+	RVBD_1234	24	69	0	0		YP_006514609.1	Rv1234	RVBD_1234			transmembrane protein
gi|561108321|ref|NC_018143.2|	1377529	1378936	+	RVBD_1235	1428	1812	1	1		YP_006514610.1	Rv1235	RVBD_1235			sugar-binding lipoprotein LpqY
gi|561108321|ref|NC_018143.2|	1378932	1379856	+	RVBD_1236	899	1172	0	3		YP_006514611.1	Rv1236	RVBD_1236			sugar-transport ABC transporter integral membrane protein SugA
gi|561108321|ref|NC_018143.2|	1379860	1380685	+	RVBD_1237	27	43	0	0		YP_006514612.1	Rv1237	RVBD_1237			sugar-transport ABC transporter integral membrane protein SugB
gi|561108321|ref|NC_018143.2|	1380689	1381871	+	RVBD_1238	113	181	2	2		YP_006514613.1	Rv1238	RVBD_1238			sugar-transport ABC transporter ATP-binding protein
gi|561108321|ref|NC_018143.2|	1381947	1383048	-	RVBD_1239c	121	262	2	0		YP_006514614.1	Rv1239c	RVBD_1239c			magnesium and cobalt transporter CorA
gi|561108321|ref|NC_018143.2|	1383218	1384208	+	RVBD_1240	0	0	1	0		YP_006514615.1	Rv1240	RVBD_1240			malate dehydrogenase Mdh
gi|561108321|ref|NC_018143.2|	1384283	1384544	+	RVBD_1241	41	41	0	0		YP_006514616.1	Rv1241	RVBD_1241			antitoxin VapB33
gi|561108321|ref|NC_018143.2|	1384540	1384972	+	RVBD_1242	329	288	2	4		YP_006514617.1	Rv1242	RVBD_1242			toxin VapC33
gi|561108321|ref|NC_018143.2|	1384994	1386683	-	RVBD_1243c	1695	1074	5	11		YP_006514618.1	Rv1243c	RVBD_1243c			PE-PGRS family protein PE_PGRS23
gi|561108321|ref|NC_018143.2|	1386862	1387723	+	RVBD_1244	86	115	13	6		YP_006514619.1	Rv1244	RVBD_1244			lipoprotein LpqZ
gi|561108321|ref|NC_018143.2|	1387803	1388634	-	RVBD_1245c	189	175	0	1		YP_006514620.1	Rv1245c	RVBD_1245c			oxidoreductase
gi|561108321|ref|NC_018143.2|	1388690	1388984	-	RVBD_1246c	120	98	1	0		YP_006514621.1	Rv1246c	RVBD_1246c			toxin RelE
gi|561108321|ref|NC_018143.2|	1388980	1389250	-	RVBD_1247c	517	525	0	0		YP_006514622.1	Rv1247c	RVBD_1247c			antitoxin RelB
gi|561108321|ref|NC_018143.2|	1389362	1393058	-	RVBD_1248c	1	17	1	1		YP_006514623.1	Rv1248c	RVBD_1248c			2-oxoglutarate decarboxylase
gi|561108321|ref|NC_018143.2|	1393199	1393988	-	RVBD_1249c	1992	1807	57	48		YP_006514624.1	Rv1249c	RVBD_1249c			membrane protein
gi|561108321|ref|NC_018143.2|	1394184	1395924	+	RVBD_1250	383	367	10	5		YP_006514625.1	Rv1250	RVBD_1250			drug:H+ antiporter-2 (14 Spanner) (DHA2) family drug resistance MFS transporter
gi|561108321|ref|NC_018143.2|	1395826	1399246	-	RVBD_1251c	572	627	7	8		YP_006514626.1	Rv1251c	RVBD_1251c			hypothetical protein
gi|561108321|ref|NC_018143.2|	1399301	1399910	-	RVBD_1252c	87	134	0	0		YP_006514627.1	Rv1252c	RVBD_1252c			lipoprotein LprE
gi|561108321|ref|NC_018143.2|	1399975	1401667	+	RVBD_1253	356	440	0	0		YP_006514628.1	Rv1253	RVBD_1253			cold shock DeaD-box protein A DeaD
gi|561108321|ref|NC_018143.2|	1401663	1402815	+	RVBD_1254	11	35	0	0		YP_006514629.1	Rv1254	RVBD_1254			acyltransferase
gi|561108321|ref|NC_018143.2|	1402783	1403392	-	RVBD_1255c	46	52	0	0		YP_006514630.1	Rv1255c	RVBD_1255c			transcriptional regulator
gi|561108321|ref|NC_018143.2|	1403391	1404609	-	RVBD_1256c	270	224	0	0		YP_006514631.1	Rv1256c	RVBD_1256c			cytochrome P450 130 Cyp130
gi|561108321|ref|NC_018143.2|	1404722	1406090	-	RVBD_1257c	271	292	2	0		YP_006514632.1	Rv1257c	RVBD_1257c			glycolate oxidase subunit GlcD
gi|561108321|ref|NC_018143.2|	1406086	1407346	-	RVBD_1258c	485	491	2	1		YP_006514633.1	Rv1258c	RVBD_1258c			H+ antiporter protein
gi|561108321|ref|NC_018143.2|	1407344	1408244	+	RVBD_1259	64	44	0	0		YP_006514634.1	Rv1259	RVBD_1259			uracil DNA glycosylase UdgB
gi|561108321|ref|NC_018143.2|	1408245	1409364	+	RVBD_1260	13	17	1	0		YP_006514635.1	Rv1260	RVBD_1260			oxidoreductase
gi|561108321|ref|NC_018143.2|	1409489	1409939	-	RVBD_1261c	125	160	3	1		YP_006514636.1	Rv1261c	RVBD_1261c			deazaflavin-dependent nitroreductase
gi|561108321|ref|NC_018143.2|	1409943	1410378	-	RVBD_1262c	50	44	0	1		YP_006514637.1	Rv1262c	RVBD_1262c			hypothetical protein
gi|561108321|ref|NC_018143.2|	1410436	1411825	+	RVBD_1263	1320	1347	2	3		YP_006514638.1	Rv1263	RVBD_1263			amidase AmiB2
gi|561108321|ref|NC_018143.2|	1411899	1413093	+	RVBD_1264	640	588	0	2		YP_006514639.1	Rv1264	RVBD_1264			adenylate cyclase
gi|561108321|ref|NC_018143.2|	1413265	1413946	+	RVBD_1265	37	38	0	0		YP_006514640.1	Rv1265	RVBD_1265			hypothetical protein
gi|561108321|ref|NC_018143.2|	1413965	1415846	-	RVBD_1266c	2207	1908	9	6		YP_006514641.1	Rv1266c	RVBD_1266c			transmembrane serine/threonine-protein kinase H PknH
gi|561108321|ref|NC_018143.2|	1416186	1417353	-	RVBD_1267c	601	753	0	3		YP_006514642.1	Rv1267c	RVBD_1267c			transcriptional regulator EmbR
gi|561108321|ref|NC_018143.2|	1417663	1418362	-	RVBD_1268c	449	546	10	11		YP_006514643.1	Rv1268c	RVBD_1268c			hypothetical protein
gi|561108321|ref|NC_018143.2|	1418584	1418959	-	RVBD_1269c	88	152	0	0		YP_006514644.1	Rv1269c	RVBD_1269c			secreted protein
gi|561108321|ref|NC_018143.2|	1419019	1419754	-	RVBD_1270c	88	164	2	0		YP_006514645.1	Rv1270c	RVBD_1270c			lipoprotein LprA
gi|561108321|ref|NC_018143.2|	1419966	1420308	-	RVBD_1271c	109	134	0	0		YP_006514646.1	Rv1271c	RVBD_1271c			secreted protein
gi|561108321|ref|NC_018143.2|	1420415	1422311	-	RVBD_1272c	713	1151	11	9		YP_006514647.1	Rv1272c	RVBD_1272c			ABC transporter membrane protein
gi|561108321|ref|NC_018143.2|	1422307	1424056	-	RVBD_1273c	177	328	1	1		YP_006514648.1	Rv1273c	RVBD_1273c			ABC transporter membrane protein
gi|561108321|ref|NC_018143.2|	1424202	1424760	+	RVBD_1274	1	13	0	0		YP_006514649.1	Rv1274	RVBD_1274			lipoprotein LprB
gi|561108321|ref|NC_018143.2|	1424756	1425299	+	RVBD_1275	0	0	0	0		YP_006514650.1	Rv1275	RVBD_1275			lipoprotein LprC
gi|561108321|ref|NC_018143.2|	1425443	1425920	-	RVBD_1276c	36	69	0	0		YP_006514651.1	Rv1276c	RVBD_1276c			phosphohistidine phosphatase
gi|561108321|ref|NC_018143.2|	1426169	1427423	+	RVBD_1277	135	139	0	0		YP_006514652.1	Rv1277	RVBD_1277			hypothetical protein
gi|561108321|ref|NC_018143.2|	1427419	1430047	+	RVBD_1278	1646	1492	4	7		YP_006514653.1	Rv1278	RVBD_1278			hypothetical protein
gi|561108321|ref|NC_018143.2|	1430067	1431654	+	RVBD_1279	2985	3765	3	7		YP_006514654.1	Rv1279	RVBD_1279			dehydrogenase FAD flavoprotein gmc oxidoreductase
gi|561108321|ref|NC_018143.2|	1431670	1433446	-	RVBD_1280c	252	306	0	0		YP_006514655.1	Rv1280c	RVBD_1280c			periplasmic oligopeptide-binding lipoprotein OppA
gi|561108321|ref|NC_018143.2|	1433438	1435277	-	RVBD_1281c	23	35	0	0		YP_006514656.1	Rv1281c	RVBD_1281c			oligopeptide-transport ABC transporter ATP-binding protein OppD
gi|561108321|ref|NC_018143.2|	1435273	1436149	-	RVBD_1282c	49	84	0	0		YP_006514657.1	Rv1282c	RVBD_1282c			oligopeptide-transport ABC transporter integral membrane protein OppC
gi|561108321|ref|NC_018143.2|	1436145	1437123	-	RVBD_1283c	93	168	0	2		YP_006514658.1	Rv1283c	RVBD_1283c			oligopeptide-transport ABC transporter integral membrane protein OppB
gi|561108321|ref|NC_018143.2|	1437329	1437821	+	RVBD_1284	718	1004	4	4		YP_006514659.1	Rv1284	RVBD_1284			beta-carbonic anhydrase
gi|561108321|ref|NC_018143.2|	1437914	1438913	+	RVBD_1285	11	19	0	0		YP_006514660.1	Rv1285	RVBD_1285			sulfate adenylyltransferase subunit 2 CysD
gi|561108321|ref|NC_018143.2|	1438912	1440757	+	RVBD_1286	32	37	0	0		YP_006514661.1	Rv1286	RVBD_1286			bifunctional enzyme CysN/CysC
gi|561108321|ref|NC_018143.2|	1440810	1441296	+	RVBD_1287	67	109	0	0		YP_006514662.1	Rv1287	RVBD_1287			Rrf2 family protein
gi|561108321|ref|NC_018143.2|	1441353	1442724	+	RVBD_1288	5782	7134	11	5		YP_006514663.1	Rv1288	RVBD_1288			mycolyltransferase II
gi|561108321|ref|NC_018143.2|	1442772	1443405	+	RVBD_1289	5706	5633	23	34		YP_006514664.1	Rv1289	RVBD_1289			hypothetical protein
gi|561108321|ref|NC_018143.2|	1445063	1445378	+	RVBD_1290A	4	6	2	0		YP_006514666.1	Rv1290A	RVBD_1290A			hypothetical protein
gi|561108321|ref|NC_018143.2|	1443487	1445053	-	RVBD_1290c	734	857	2	4		YP_006514665.1	Rv1290c	RVBD_1290c			hypothetical protein
gi|561108321|ref|NC_018143.2|	1445504	1445840	-	RVBD_1291c	21	28	2	2		YP_006514667.1	Rv1291c	RVBD_1291c			secreted protein
gi|561108321|ref|NC_018143.2|	1446384	1448037	+	RVBD_1292	8	8	0	0		YP_006514668.1	Rv1292	RVBD_1292			arginyl-tRNA synthetase ArgS
gi|561108321|ref|NC_018143.2|	1448033	1449377	+	RVBD_1293	0	0	0	0		YP_006514669.1	Rv1293	RVBD_1293			diaminopimelate decarboxylase LysA
gi|561108321|ref|NC_018143.2|	1449380	1450706	+	RVBD_1294	0	0	0	0		YP_006514670.1	Rv1294	RVBD_1294			homoserine dehydrogenase ThrA
gi|561108321|ref|NC_018143.2|	1450702	1451785	+	RVBD_1295	0	3	0	0		YP_006514671.1	Rv1295	RVBD_1295			threonine synthase ThrC
gi|561108321|ref|NC_018143.2|	1452002	1452953	+	RVBD_1296	0	0	0	0		YP_006514673.1	Rv1296	RVBD_1296			homoserine kinase ThrB
gi|561108321|ref|NC_018143.2|	1453209	1455018	+	RVBD_1297	0	0	0	0		YP_006514674.1	Rv1297	RVBD_1297			transcription termination factor Rho
gi|561108321|ref|NC_018143.2|	1455168	1455411	+	RVBD_1298	0	0	0	0		YP_006514675.1	Rv1298	RVBD_1298			50S ribosomal protein L31 RpmE
gi|561108321|ref|NC_018143.2|	1455500	1456574	+	RVBD_1299	0	0	0	1		YP_006514676.1	Rv1299	RVBD_1299			peptide chain release factor 1 PrfA
gi|561108321|ref|NC_018143.2|	1456570	1457548	+	RVBD_1300	0	0	0	0		YP_006514677.1	Rv1300	RVBD_1300			HemK protein
gi|561108321|ref|NC_018143.2|	1457563	1458217	+	RVBD_1301	0	1	0	0		YP_006514678.1	Rv1301	RVBD_1301			Sua5/YciO/YrdC/YwlC family protein
gi|561108321|ref|NC_018143.2|	1458300	1459515	+	RVBD_1302	345	508	1	0		YP_006514679.1	Rv1302	RVBD_1302			undecaprenyl-phosphate alpha-N-acetylglucosaminyltransferase Rfe
gi|561108321|ref|NC_018143.2|	1459771	1460257	+	RVBD_1303	8	13	0	0		YP_006514680.1	Rv1303	RVBD_1303			hypothetical protein
gi|561108321|ref|NC_018143.2|	1460249	1461002	+	RVBD_1304	0	1	0	0		YP_006514681.1	Rv1304	RVBD_1304			ATP synthase A chain AtpB
gi|561108321|ref|NC_018143.2|	1461050	1461296	+	RVBD_1305	0	3	0	0		YP_006514682.1	Rv1305	RVBD_1305			ATP synthase C chain AtpE
gi|561108321|ref|NC_018143.2|	1461326	1461842	+	RVBD_1306	0	2	0	0		YP_006514683.1	Rv1306	RVBD_1306			ATP synthase B chain AtpF
gi|561108321|ref|NC_018143.2|	1461848	1463189	+	RVBD_1307	0	0	0	0		YP_006514684.1	Rv1307	RVBD_1307			ATP synthase delta chain AtpH
gi|561108321|ref|NC_018143.2|	1463233	1464883	+	RVBD_1308	0	1	0	0		YP_006514685.1	Rv1308	RVBD_1308			ATP synthase alpha chain AtpA
gi|561108321|ref|NC_018143.2|	1464889	1465807	+	RVBD_1309	16	116	2	4		YP_006514686.1	Rv1309	RVBD_1309			ATP synthase gamma chain AtpG
gi|561108321|ref|NC_018143.2|	1465846	1467307	+	RVBD_1310	13	141	3	1		YP_006514687.1	Rv1310	RVBD_1310			ATP synthase beta chain AtpD
gi|561108321|ref|NC_018143.2|	1467320	1467686	+	RVBD_1311	0	0	0	0		YP_006514688.1	Rv1311	RVBD_1311			ATP synthase epsilon chain AtpC
gi|561108321|ref|NC_018143.2|	1467693	1468137	+	RVBD_1312	19	44	0	0		YP_006514689.1	Rv1312	RVBD_1312			secreted protein
gi|561108321|ref|NC_018143.2|	1468176	1469511	-	RVBD_1313c	303	388	1	1		YP_006514690.1	Rv1313c	RVBD_1313c			transposase
gi|561108321|ref|NC_018143.2|	1469676	1470258	-	RVBD_1314c	194	379	2	2		YP_006514691.1	Rv1314c	RVBD_1314c			cob(I)yrinic acid a
gi|561108321|ref|NC_018143.2|	1470326	1471583	+	RVBD_1315	13	50	0	0		YP_006514692.1	Rv1315	RVBD_1315			UDP-N-acetylglucosamine 1-carboxyvinyltransferase MurA
gi|561108321|ref|NC_018143.2|	1477139	1477637	-	RVBD_1316c	775	1159	2	3		YP_006514693.1	Rv1316c	RVBD_1316c			methylated-DNA-protein-cysteine methyltransferase Ogt
gi|561108321|ref|NC_018143.2|	1477633	1479124	-	RVBD_1317c	558	792	1	0		YP_006514694.1	Rv1317c	RVBD_1317c			bifunctional regulatory protein and DNA repair enzyme AlkA
gi|561108321|ref|NC_018143.2|	1479204	1480830	-	RVBD_1318c	680	930	4	3		YP_006514695.1	Rv1318c	RVBD_1318c			adenylate cyclase
gi|561108321|ref|NC_018143.2|	1480899	1482507	-	RVBD_1319c	1261	2044	12	9		YP_006514696.1	Rv1319c	RVBD_1319c			adenylate cyclase
gi|561108321|ref|NC_018143.2|	1482519	1484223	-	RVBD_1320c	596	960	3	6		YP_006514697.1	Rv1320c	RVBD_1320c			adenylate cyclase
gi|561108321|ref|NC_018143.2|	1484284	1484965	+	RVBD_1321	1228	2120	3	4		YP_006514698.1	Rv1321	RVBD_1321			hypothetical protein
gi|561108321|ref|NC_018143.2|	1484987	1485284	+	RVBD_1322	125	173	0	0		YP_006514699.1	Rv1322	RVBD_1322			hypothetical protein
gi|561108321|ref|NC_018143.2|	1485318	1485777	-	RVBD_1322A	56	76	2	1		YP_006514700.1	Rv1322A	RVBD_1322A			methylmalonyl-CoA epimerase
gi|561108321|ref|NC_018143.2|	1485867	1487037	+	RVBD_1323	590	832	1	2		YP_006514701.1	Rv1323	RVBD_1323			acetyl-CoA acetyltransferase FadA4
gi|561108321|ref|NC_018143.2|	1487166	1488081	+	RVBD_1324	8	1	0	0		YP_006514702.1	Rv1324	RVBD_1324			thioredoxin
gi|561108321|ref|NC_018143.2|	1488159	1489971	-	RVBD_1325c	28	26	0	0		YP_006514703.1	Rv1325c	RVBD_1325c			PE-PGRS family protein PE_PGRS24
gi|561108321|ref|NC_018143.2|	1490122	1492318	-	RVBD_1326c	1	0	0	0		YP_006514704.1	Rv1326c	RVBD_1326c			1
gi|561108321|ref|NC_018143.2|	1492325	1494431	-	RVBD_1327c	28	35	0	1		YP_006514705.1	Rv1327c	RVBD_1327c			glucanase GlgE
gi|561108321|ref|NC_018143.2|	1494569	1497161	+	RVBD_1328	314	215	0	0		YP_006514706.1	Rv1328	RVBD_1328			glycogen phosphorylase GlgP
gi|561108321|ref|NC_018143.2|	1497200	1499195	-	RVBD_1329c	4094	4378	4	7		YP_006514707.1	Rv1329c	RVBD_1329c			ATP-dependent DNA helicase DinG
gi|561108321|ref|NC_018143.2|	1499218	1500565	-	RVBD_1330c	268	310	14	22		YP_006514708.1	Rv1330c	RVBD_1330c			nicotinate phosphoribosyltransferase PncB1
gi|561108321|ref|NC_018143.2|	1500666	1500972	+	RVBD_1331	43	21	0	0		YP_006514709.1	Rv1331	RVBD_1331			ATP-dependent Clp protease adapter protein ClpS
gi|561108321|ref|NC_018143.2|	1500931	1501588	+	RVBD_1332	290	254	1	1		YP_006514710.1	Rv1332	RVBD_1332			transcriptional regulator
gi|561108321|ref|NC_018143.2|	1501604	1502639	+	RVBD_1333	323	306	3	3		YP_006514711.1	Rv1333	RVBD_1333			hydrolase
gi|561108321|ref|NC_018143.2|	1502646	1503087	+	RVBD_1334	3349	3327	29	23		YP_006514712.1	Rv1334	RVBD_1334			hydrolase
gi|561108321|ref|NC_018143.2|	1503108	1503390	+	RVBD_1335	4156	4445	22	24		YP_006514713.1	Rv1335	RVBD_1335			sulfur carrier protein CysO
gi|561108321|ref|NC_018143.2|	1503399	1504371	+	RVBD_1336	976	1313	16	22		YP_006514714.1	Rv1336	RVBD_1336			cysteine synthase B CysM
gi|561108321|ref|NC_018143.2|	1504361	1505084	+	RVBD_1337	476	620	6	2		YP_006514715.1	Rv1337	RVBD_1337			membrane protein
gi|561108321|ref|NC_018143.2|	1505080	1505896	+	RVBD_1338	551	856	0	1		YP_006514716.1	Rv1338	RVBD_1338			glutamate racemase MurI
gi|561108321|ref|NC_018143.2|	1505922	1506744	+	RVBD_1339	1570	2949	14	4		YP_006514717.1	Rv1339	RVBD_1339			hypothetical protein
gi|561108321|ref|NC_018143.2|	1506760	1507540	+	RVBD_1340	23	22	12	17		YP_006514718.1	Rv1340	RVBD_1340			ribonuclease RphA
gi|561108321|ref|NC_018143.2|	1507578	1508193	+	RVBD_1341	47	70	27	23		YP_006514719.1	Rv1341	RVBD_1341			nucleoside-triphosphatase
gi|561108321|ref|NC_018143.2|	1508189	1508552	-	RVBD_1342c	60	153	26	20		YP_006514720.1	Rv1342c	RVBD_1342c			integral membrane protein
gi|561108321|ref|NC_018143.2|	1508548	1508929	-	RVBD_1343c	6	29	0	0		YP_006514721.1	Rv1343c	RVBD_1343c			lipoprotein LprD
gi|561108321|ref|NC_018143.2|	1508973	1509294	+	RVBD_1344	454	588	14	27		YP_006514722.1	Rv1344	RVBD_1344			acyl carrier protein MbtL
gi|561108321|ref|NC_018143.2|	1509286	1510852	+	RVBD_1345	1833	2543	4	9		YP_006514723.1	Rv1345	RVBD_1345			fatty acyl-AMP ligase MbtM
gi|561108321|ref|NC_018143.2|	1510851	1512012	+	RVBD_1346	65	85	0	0		YP_006514724.1	Rv1346	RVBD_1346			acyl-CoA dehydrogenase MbtN
gi|561108321|ref|NC_018143.2|	1511978	1512611	-	RVBD_1347c	198	385	1	1		YP_006514725.1	Rv1347c	RVBD_1347c			lysine N-acetyltransferase MbtK
gi|561108321|ref|NC_018143.2|	1513052	1515632	+	RVBD_1348	48	116	0	0		YP_006514726.1	Rv1348	RVBD_1348			iron-regulated transporter IrtA
gi|561108321|ref|NC_018143.2|	1515628	1517368	+	RVBD_1349	50	153	0	0		YP_006514727.1	Rv1349	RVBD_1349			iron-regulated transporter IrtB
gi|561108321|ref|NC_018143.2|	1517496	1518240	+	RVBD_1350	4	7	0	0		YP_006514728.1	Rv1350	RVBD_1350			3-oxoacyl-[acyl-carrier protein] reductase FabG2
gi|561108321|ref|NC_018143.2|	1518236	1518566	+	RVBD_1351	302	532	0	0		YP_006514729.1	Rv1351	RVBD_1351			hypothetical protein
gi|561108321|ref|NC_018143.2|	1518768	1519140	+	RVBD_1352	135	272	0	0		YP_006514730.1	Rv1352	RVBD_1352			hypothetical protein
gi|561108321|ref|NC_018143.2|	1519205	1519991	-	RVBD_1353c	122	363	1	1		YP_006514731.1	Rv1353c	RVBD_1353c			transcriptional regulator
gi|561108321|ref|NC_018143.2|	1520010	1521882	-	RVBD_1354c	845	1818	7	6		YP_006514732.1	Rv1354c	RVBD_1354c			diguanylate cyclase (GGDEF) domain-containing protein
gi|561108321|ref|NC_018143.2|	1521890	1524038	-	RVBD_1355c	357	685	1	1		YP_006514733.1	Rv1355c	RVBD_1355c			molybdopterin biosynthesis protein MoeY
gi|561108321|ref|NC_018143.2|	1524034	1524826	-	RVBD_1356c	287	566	4	1		YP_006514734.1	Rv1356c	RVBD_1356c			hypothetical protein
gi|561108321|ref|NC_018143.2|	1525298	1526222	-	RVBD_1357c	15	87	2	2		YP_006514735.1	Rv1357c	RVBD_1357c			hypothetical protein
gi|561108321|ref|NC_018143.2|	1526617	1530097	+	RVBD_1358	2821	5253	27	26		YP_006514737.1	Rv1358	RVBD_1358			transcriptional regulator
gi|561108321|ref|NC_018143.2|	1530178	1530931	+	RVBD_1359	52	90	1	1		YP_006514738.1	Rv1359	RVBD_1359			transcriptional regulator
gi|561108321|ref|NC_018143.2|	1531353	1532376	+	RVBD_1360	1013	1501	0	0		YP_006514740.1	Rv1360	RVBD_1360			oxidoreductase
gi|561108321|ref|NC_018143.2|	1532448	1533639	-	RVBD_1361c	1651	2185	3	1		YP_006514741.1	Rv1361c	RVBD_1361c			PPE family protein PPE19
gi|561108321|ref|NC_018143.2|	1533953	1534616	-	RVBD_1362c	77	155	5	3		YP_006514742.1	Rv1362c	RVBD_1362c			membrane protein
gi|561108321|ref|NC_018143.2|	1534612	1535398	-	RVBD_1363c	119	195	0	3		YP_006514743.1	Rv1363c	RVBD_1363c			membrane protein
gi|561108321|ref|NC_018143.2|	1535688	1537650	-	RVBD_1364c	647	1052	3	5		YP_006514744.1	Rv1364c	RVBD_1364c			anti-anti-sigma factor
gi|561108321|ref|NC_018143.2|	1537788	1538175	-	RVBD_1365c	182	299	0	0		YP_006514745.1	Rv1365c	RVBD_1365c			anti-anti-sigma factor RsfA
gi|561108321|ref|NC_018143.2|	1538395	1539217	+	RVBD_1366	373	568	3	3		YP_006514746.1	Rv1366	RVBD_1366			hypothetical protein
gi|561108321|ref|NC_018143.2|	1539185	1539446	+	RVBD_1366A	53	93	0	0		YP_008855184.1	Rv1366A	RVBD_1366A			hypothetical protein
gi|561108321|ref|NC_018143.2|	1539517	1540651	-	RVBD_1367c	242	382	1	0		YP_006514747.2	Rv1367c	RVBD_1367c			hypothetical protein
gi|561108321|ref|NC_018143.2|	1541025	1541811	+	RVBD_1368	878	1544	0	1		YP_006514748.1	Rv1368	RVBD_1368			lipoprotein LprF
gi|561108321|ref|NC_018143.2|	1541999	1542884	-	RVBD_1369c	687	1042	3	6		YP_006514749.1	Rv1369c	RVBD_1369c			transposase
gi|561108321|ref|NC_018143.2|	1542934	1543261	-	RVBD_1370c	240	324	1	1		YP_006514750.1	Rv1370c	RVBD_1370c			transposase
gi|561108321|ref|NC_018143.2|	1543364	1544834	+	RVBD_1371	22	55	0	1		YP_006514751.1	Rv1371	RVBD_1371			membrane protein
gi|561108321|ref|NC_018143.2|	1544830	1546012	+	RVBD_1372	831	1396	1	0		YP_006514752.1	Rv1372	RVBD_1372			hypothetical protein
gi|561108321|ref|NC_018143.2|	1546017	1546998	+	RVBD_1373	294	485	7	3		YP_006514753.1	Rv1373	RVBD_1373			glycolipid sulfotransferase
gi|561108321|ref|NC_018143.2|	1547077	1547536	-	RVBD_1374c	900	1261	3	5		YP_006514754.1	Rv1374c	RVBD_1374c			hypothetical protein
gi|561108321|ref|NC_018143.2|	1547837	1549157	+	RVBD_1375	1111	1179	2	11		YP_006514755.1	Rv1375	RVBD_1375			hypothetical protein
gi|561108321|ref|NC_018143.2|	1549153	1550647	+	RVBD_1376	4309	3273	5	3		YP_006514756.1	Rv1376	RVBD_1376			hypothetical protein
gi|561108321|ref|NC_018143.2|	1550584	1551223	-	RVBD_1377c	721	631	4	6		YP_006514757.1	Rv1377c	RVBD_1377c			transferase
gi|561108321|ref|NC_018143.2|	1551233	1552661	-	RVBD_1378c	3753	2910	6	7		YP_006514758.1	Rv1378c	RVBD_1378c			hypothetical protein
gi|561108321|ref|NC_018143.2|	1552659	1553241	+	RVBD_1379	0	0	0	0		YP_006514759.1	Rv1379	RVBD_1379			pyrimidine operon regulatory protein PyrR
gi|561108321|ref|NC_018143.2|	1553237	1554197	+	RVBD_1380	0	0	0	0		YP_006514760.1	Rv1380	RVBD_1380			aspartate carbamoyltransferase PyrB
gi|561108321|ref|NC_018143.2|	1554193	1555486	+	RVBD_1381	0	0	0	0		YP_006514761.1	Rv1381	RVBD_1381			dihydroorotase PyrC
gi|561108321|ref|NC_018143.2|	1555482	1555980	+	RVBD_1382	0	0	0	1		YP_006514762.1	Rv1382	RVBD_1382			exported or membrane protein
gi|561108321|ref|NC_018143.2|	1555976	1557107	+	RVBD_1383	0	0	0	0		YP_006514763.1	Rv1383	RVBD_1383			carbamoyl-phosphate synthase small chain CarA
gi|561108321|ref|NC_018143.2|	1557106	1560454	+	RVBD_1384	0	0	1	1		YP_006514764.1	Rv1384	RVBD_1384			carbamoyl-phosphate synthase large chain CarB
gi|561108321|ref|NC_018143.2|	1560450	1561275	+	RVBD_1385	0	0	0	0		YP_006514765.1	Rv1385	RVBD_1385			orotidine 5'-phosphate decarboxylase PyrF
gi|561108321|ref|NC_018143.2|	1561469	1561778	+	RVBD_1386	186	145	2	2		YP_006514766.1	Rv1386	RVBD_1386			PE family protein PE15
gi|561108321|ref|NC_018143.2|	1561774	1563394	+	RVBD_1387	2985	2360	6	13		YP_006514767.1	Rv1387	RVBD_1387			PPE family protein PPE20
gi|561108321|ref|NC_018143.2|	1563699	1564272	+	RVBD_1388	0	0	0	0		YP_006514768.1	Rv1388	RVBD_1388			integration host factor MihF
gi|561108321|ref|NC_018143.2|	1564406	1565033	+	RVBD_1389	2	0	0	0		YP_006514769.1	Rv1389	RVBD_1389			guanylate kinase Gmk
gi|561108321|ref|NC_018143.2|	1565098	1565431	+	RVBD_1390	9	11	0	0		YP_006514770.1	Rv1390	RVBD_1390			DNA-directed RNA polymerase omega chain RpoZ
gi|561108321|ref|NC_018143.2|	1565446	1566703	+	RVBD_1391	104	80	0	0		YP_006514771.1	Rv1391	RVBD_1391			DNA/pantothenate metabolism flavoprotein Dfp
gi|561108321|ref|NC_018143.2|	1566830	1568042	+	RVBD_1392	0	0	0	0		YP_006514772.1	Rv1392	RVBD_1392			s-adenosylmethionine synthetase MetK
gi|561108321|ref|NC_018143.2|	1568114	1569593	-	RVBD_1393c	3918	3992	12	5		YP_006514773.1	Rv1393c	RVBD_1393c			cyclohexanone monooxygenase
gi|561108321|ref|NC_018143.2|	1569589	1570975	-	RVBD_1394c	1792	1705	4	6		YP_006514774.1	Rv1394c	RVBD_1394c			cytochrome P450 132 Cyp132
gi|561108321|ref|NC_018143.2|	1571052	1572087	+	RVBD_1395	1946	1733	1	1		YP_006514775.1	Rv1395	RVBD_1395			transcriptional regulator
gi|561108321|ref|NC_018143.2|	1572132	1573863	-	RVBD_1396c	1336	894	5	0		YP_006514776.1	Rv1396c	RVBD_1396c			PE-PGRS family protein PE_PGRS25
gi|561108321|ref|NC_018143.2|	1574117	1574519	-	RVBD_1397c	1400	950	1	1		YP_006514777.1	Rv1397c	RVBD_1397c			toxin VapC10
gi|561108321|ref|NC_018143.2|	1574515	1574773	-	RVBD_1398c	396	311	0	0		YP_006514778.1	Rv1398c	RVBD_1398c			antitoxin VapB10
gi|561108321|ref|NC_018143.2|	1574855	1575815	-	RVBD_1399c	2494	1794	2	4		YP_006514779.1	Rv1399c	RVBD_1399c			lipase LipH
gi|561108321|ref|NC_018143.2|	1575839	1576802	-	RVBD_1400c	470	315	0	1		YP_006514780.1	Rv1400c	RVBD_1400c			lipase LipH
gi|561108321|ref|NC_018143.2|	1576935	1577538	+	RVBD_1401	7	6	0	0		YP_006514781.1	Rv1401	RVBD_1401			membrane protein
gi|561108321|ref|NC_018143.2|	1577618	1579586	+	RVBD_1402	50	29	2	1		YP_006514782.1	Rv1402	RVBD_1402			primosomal protein N' PriA
gi|561108321|ref|NC_018143.2|	1579603	1580428	-	RVBD_1403c	859	619	2	3		YP_006514783.1	Rv1403c	RVBD_1403c			methyltransferase
gi|561108321|ref|NC_018143.2|	1580596	1581079	+	RVBD_1404	117	143	0	0		YP_006514784.1	Rv1404	RVBD_1404			transcriptional regulator
gi|561108321|ref|NC_018143.2|	1581150	1581975	-	RVBD_1405c	819	710	7	17		YP_006514785.1	Rv1405c	RVBD_1405c			methyltransferase
gi|561108321|ref|NC_018143.2|	1582171	1583110	+	RVBD_1406	45	20	0	0		YP_006514786.1	Rv1406	RVBD_1406			methionyl-tRNA formyltransferase Fmt
gi|561108321|ref|NC_018143.2|	1583106	1584480	+	RVBD_1407	342	269	0	0		YP_006514787.1	Rv1407	RVBD_1407			protein Fmu
gi|561108321|ref|NC_018143.2|	1584504	1585203	+	RVBD_1408	67	43	1	0		YP_006514788.1	Rv1408	RVBD_1408			ribulose-phosphate 3-epimerase Rpe
gi|561108321|ref|NC_018143.2|	1585199	1586219	+	RVBD_1409	0	0	0	0		YP_006514789.1	Rv1409	RVBD_1409			bifunctional riboflavin biosynthesis protein RibG
gi|561108321|ref|NC_018143.2|	1586215	1587772	-	RVBD_1410c	269	494	1	0		YP_006514790.1	Rv1410c	RVBD_1410c			MFS drug efflux transporter P55
gi|561108321|ref|NC_018143.2|	1587777	1588488	-	RVBD_1411c	39	186	0	0		YP_006514791.1	Rv1411c	RVBD_1411c			lipoprotein LprG
gi|561108321|ref|NC_018143.2|	1588572	1589178	+	RVBD_1412	0	0	0	0		YP_006514792.1	Rv1412	RVBD_1412			riboflavin synthase alpha chain RibC
gi|561108321|ref|NC_018143.2|	1589391	1589907	+	RVBD_1413	558	493	4	5		YP_006514793.1	Rv1413	RVBD_1413			hypothetical protein
gi|561108321|ref|NC_018143.2|	1589896	1590298	+	RVBD_1414	45	54	2	2		YP_006514794.1	Rv1414	RVBD_1414			hypothetical protein
gi|561108321|ref|NC_018143.2|	1590402	1591680	+	RVBD_1415	0	0	0	0		YP_006514795.1	Rv1415	RVBD_1415			riboflavin biosynthesis protein RibA2
gi|561108321|ref|NC_018143.2|	1591676	1592159	+	RVBD_1416	0	0	0	0		YP_006514796.2	Rv1416	RVBD_1416			riboflavin synthase beta chain RibH
gi|561108321|ref|NC_018143.2|	1592155	1592620	+	RVBD_1417	47	28	0	0		YP_006514797.1	Rv1417	RVBD_1417			membrane protein
gi|561108321|ref|NC_018143.2|	1592644	1593331	+	RVBD_1418	299	356	0	1		YP_006514798.1	Rv1418	RVBD_1418			lipoprotein LprH
gi|561108321|ref|NC_018143.2|	1593510	1593984	+	RVBD_1419	1386	1423	1	0		YP_006514799.1	Rv1419	RVBD_1419			lectin
gi|561108321|ref|NC_018143.2|	1594047	1595988	+	RVBD_1420	146	158	1	1		YP_006514800.1	Rv1420	RVBD_1420			excinuclease ABC UvrC
gi|561108321|ref|NC_018143.2|	1595984	1596890	+	RVBD_1421	520	1734	2	0		YP_006514801.1	Rv1421	RVBD_1421			nucleotide-binding protein
gi|561108321|ref|NC_018143.2|	1596886	1597915	+	RVBD_1422	18	32	2	6		YP_006514802.1	Rv1422	RVBD_1422			hypothetical protein
gi|561108321|ref|NC_018143.2|	1597911	1598889	+	RVBD_1423	0	0	0	0		YP_006514803.1	Rv1423	RVBD_1423			transcriptional regulator WhiA
gi|561108321|ref|NC_018143.2|	1598898	1599660	-	RVBD_1424c	2378	2164	4	6		YP_006514804.1	Rv1424c	RVBD_1424c			membrane protein
gi|561108321|ref|NC_018143.2|	1599663	1601043	+	RVBD_1425	263	351	0	0		YP_006514805.1	Rv1425	RVBD_1425			diacylglycerol acyltransferase
gi|561108321|ref|NC_018143.2|	1601064	1602327	-	RVBD_1426c	292	296	3	5		YP_006514806.1	Rv1426c	RVBD_1426c			esterase LipO
gi|561108321|ref|NC_018143.2|	1602326	1603934	-	RVBD_1427c	82	128	0	2		YP_006514807.1	Rv1427c	RVBD_1427c			long-chain-fatty-acid-CoA ligase FadD12
gi|561108321|ref|NC_018143.2|	1603937	1604765	-	RVBD_1428c	159	183	2	0		YP_006514808.1	Rv1428c	RVBD_1428c			hypothetical protein
gi|561108321|ref|NC_018143.2|	1604883	1606152	+	RVBD_1429	349	374	1	12		YP_006514809.1	Rv1429	RVBD_1429			hypothetical protein
gi|561108321|ref|NC_018143.2|	1606391	1607978	+	RVBD_1430	435	374	9	5		YP_006514810.1	Rv1430	RVBD_1430			PE family protein PE16
gi|561108321|ref|NC_018143.2|	1608088	1609858	+	RVBD_1431	159	167	5	1		YP_006514811.1	Rv1431	RVBD_1431			hypothetical protein
gi|561108321|ref|NC_018143.2|	1609854	1611276	+	RVBD_1432	2	0	0	0		YP_006514812.1	Rv1432	RVBD_1432			oxidoreductase
gi|561108321|ref|NC_018143.2|	1611439	1612255	+	RVBD_1433	1116	918	5	12		YP_006514813.1	Rv1433	RVBD_1433			exported protein
gi|561108321|ref|NC_018143.2|	1612261	1612399	+	RVBD_1434	6	14	0	0		YP_006514814.1	Rv1434	RVBD_1434			hypothetical protein
gi|561108321|ref|NC_018143.2|	1612347	1612956	-	RVBD_1435c	190	150	0	1		YP_006514815.1	Rv1435c	RVBD_1435c			proline and glycine and valine rich secreted protein
gi|561108321|ref|NC_018143.2|	1613312	1614332	+	RVBD_1436	8	9	0	0		YP_006514816.1	Rv1436	RVBD_1436			glyceraldehyde 3-phosphate dehydrogenase Gap
gi|561108321|ref|NC_018143.2|	1614334	1615573	+	RVBD_1437	5	5	0	1		YP_006514817.1	Rv1437	RVBD_1437			phosphoglycerate kinase Pgk
gi|561108321|ref|NC_018143.2|	1615569	1616355	+	RVBD_1438	919	932	1	1		YP_006514818.1	Rv1438	RVBD_1438			triosephosphate isomerase Tpi
gi|561108321|ref|NC_018143.2|	1616966	1617392	-	RVBD_1439c	329	233	0	0		YP_006514819.1	Rv1439c	RVBD_1439c			hypothetical protein
gi|561108321|ref|NC_018143.2|	1617842	1618076	+	RVBD_1440	208	150	1	1		YP_006514821.1	Rv1440	RVBD_1440			preprotein translocase subunit SecG
gi|561108321|ref|NC_018143.2|	1618214	1619690	-	RVBD_1441c	1346	870	2	0		YP_006514822.1	Rv1441c	RVBD_1441c			PE-PGRS family protein PE_PGRS26
gi|561108321|ref|NC_018143.2|	1619796	1622097	+	RVBD_1442	1168	920	12	12		YP_006514823.1	Rv1442	RVBD_1442			biotin sulfoxide reductase BisC
gi|561108321|ref|NC_018143.2|	1622212	1622698	-	RVBD_1443c	109	145	0	0		YP_006514824.1	Rv1443c	RVBD_1443c			hypothetical protein
gi|561108321|ref|NC_018143.2|	1623292	1623703	-	RVBD_1444c	4	5	0	0		YP_006514827.1	Rv1444c	RVBD_1444c			hypothetical protein
gi|561108321|ref|NC_018143.2|	1623719	1624463	-	RVBD_1445c	61	35	0	0		YP_006514828.1	Rv1445c	RVBD_1445c			6-phosphogluconolactonase DevB (6PGL)
gi|561108321|ref|NC_018143.2|	1624459	1625371	-	RVBD_1446c	1045	1032	1	0		YP_006514829.1	Rv1446c	RVBD_1446c			OXPP cycle protein OpcA
gi|561108321|ref|NC_018143.2|	1625423	1626968	-	RVBD_1447c	1186	1311	3	4		YP_006514830.1	Rv1447c	RVBD_1447c			glucose-6-phosphate 1-dehydrogenase Zwf2
gi|561108321|ref|NC_018143.2|	1626964	1628086	-	RVBD_1448c	34	41	0	0		YP_006514831.1	Rv1448c	RVBD_1448c			transaldolase Tal
gi|561108321|ref|NC_018143.2|	1628102	1630205	-	RVBD_1449c	17	11	1	2		YP_006514832.1	Rv1449c	RVBD_1449c			transketolase Tkt
gi|561108321|ref|NC_018143.2|	1630643	1634633	-	RVBD_1450c	1195	752	0	2		YP_006514833.1	Rv1450c	RVBD_1450c			PE-PGRS family protein PE_PGRS27
gi|561108321|ref|NC_018143.2|	1635034	1635961	+	RVBD_1451	28	24	0	1		YP_006514834.1	Rv1451	RVBD_1451			cytochrome C oxidase assembly factor CtaB
gi|561108321|ref|NC_018143.2|	1636009	1638235	-	RVBD_1452c	245	183	1	2		YP_006514835.1	Rv1452c	RVBD_1452c			PE-PGRS family protein PE_PGRS28
gi|561108321|ref|NC_018143.2|	1638386	1639652	+	RVBD_1453	4928	4175	6	6		YP_006514836.1	Rv1453	RVBD_1453			transcriptional activator
gi|561108321|ref|NC_018143.2|	1639679	1640666	-	RVBD_1454c	259	238	3	4		YP_006514837.1	Rv1454c	RVBD_1454c			quinone reductase Qor
gi|561108321|ref|NC_018143.2|	1640685	1641549	+	RVBD_1455	1203	1188	0	0		YP_006514838.1	Rv1455	RVBD_1455			hypothetical protein
gi|561108321|ref|NC_018143.2|	1641498	1642431	-	RVBD_1456c	108	92	0	0		YP_006514839.1	Rv1456c	RVBD_1456c			cytochrome C oxidase subunit XV assembly protein
gi|561108321|ref|NC_018143.2|	1642542	1643328	-	RVBD_1457c	4	6	0	0		YP_006514840.1	Rv1457c	RVBD_1457c			ABC transporter efflux protein DrrB
gi|561108321|ref|NC_018143.2|	1643324	1644266	-	RVBD_1458c	108	428	37	75		YP_006514841.1	Rv1458c	RVBD_1458c			antibiotic transporter ATP-binding protein
gi|561108321|ref|NC_018143.2|	1644368	1646144	-	RVBD_1459c	62	91	0	2		YP_006514842.1	Rv1459c	RVBD_1459c			integral membrane protein
gi|561108321|ref|NC_018143.2|	1646191	1646998	+	RVBD_1460	323	333	5	10		YP_006514843.1	Rv1460	RVBD_1460			transcriptional regulator
gi|561108321|ref|NC_018143.2|	1646994	1649535	+	RVBD_1461	0	0	1	0		YP_006514844.1	Rv1461	RVBD_1461			Fe-S cluster assembly protein SufB
gi|561108321|ref|NC_018143.2|	1649531	1650725	+	RVBD_1462	1	0	0	0		YP_006514845.1	Rv1462	RVBD_1462			Fe-S cluster assembly protein SufD
gi|561108321|ref|NC_018143.2|	1650721	1651522	+	RVBD_1463	0	0	0	0		YP_006514846.1	Rv1463	RVBD_1463			ABC transporter ATP-binding protein
gi|561108321|ref|NC_018143.2|	1651523	1652777	+	RVBD_1464	0	0	0	0		YP_006514847.1	Rv1464	RVBD_1464			cysteine desulfurase Csd
gi|561108321|ref|NC_018143.2|	1652773	1653262	+	RVBD_1465	0	1	0	0		YP_006514848.1	Rv1465	RVBD_1465			nitrogen fixation protein
gi|561108321|ref|NC_018143.2|	1653236	1653584	+	RVBD_1466	0	0	0	0		YP_006514849.1	Rv1466	RVBD_1466			hypothetical protein
gi|561108321|ref|NC_018143.2|	1653678	1655508	-	RVBD_1467c	730	653	13	16		YP_006514850.1	Rv1467c	RVBD_1467c			acyl-CoA dehydrogenase FadE15
gi|561108321|ref|NC_018143.2|	1655614	1656727	-	RVBD_1468c	181	101	6	5		YP_006514851.1	Rv1468c	RVBD_1468c			PE-PGRS family protein PE_PGRS29
gi|561108321|ref|NC_018143.2|	1656968	1658942	+	RVBD_1469	190	181	1	0		YP_006514852.1	Rv1469	RVBD_1469			cation transporter P-type ATPase CtpD
gi|561108321|ref|NC_018143.2|	1658985	1659360	+	RVBD_1470	2281	2599	7	8		YP_006514853.1	Rv1470	RVBD_1470			thioredoxin TrxA
gi|561108321|ref|NC_018143.2|	1659375	1659747	+	RVBD_1471	41	85	0	0		YP_006514854.1	Rv1471	RVBD_1471			thioredoxin TrxB1
gi|561108321|ref|NC_018143.2|	1659768	1660626	+	RVBD_1472	765	1047	0	6		YP_006514855.1	Rv1472	RVBD_1472			enoyl-CoA hydratase EchA12
gi|561108321|ref|NC_018143.2|	1660661	1662290	+	RVBD_1473	220	492	0	4		YP_006514856.1	Rv1473	RVBD_1473			ABC transporter ATP-binding protein
gi|561108321|ref|NC_018143.2|	1662386	1662578	+	RVBD_1473A	41	92	0	0		YP_006514857.1	Rv1473A	RVBD_1473A			transcriptional regulator
gi|561108321|ref|NC_018143.2|	1662646	1663210	-	RVBD_1474c	45	45	1	1		YP_006514858.1	Rv1474c	RVBD_1474c			transcriptional regulator
gi|561108321|ref|NC_018143.2|	1663220	1666052	-	RVBD_1475c	0	0	1	0		YP_006514859.1	Rv1475c	RVBD_1475c			iron-regulated aconitate hydratase Can
gi|561108321|ref|NC_018143.2|	1666209	1666770	+	RVBD_1476	0	0	0	0		YP_006514860.1	Rv1476	RVBD_1476			membrane protein
gi|561108321|ref|NC_018143.2|	1666995	1668414	+	RVBD_1477	60	76	0	0		YP_006514861.1	Rv1477	RVBD_1477			peptidoglycan hydrolase
gi|561108321|ref|NC_018143.2|	1668424	1669150	+	RVBD_1478	113	195	1	0		YP_006514862.1	Rv1478	RVBD_1478			invasion-associated protein
gi|561108321|ref|NC_018143.2|	1669288	1670422	+	RVBD_1479	0	0	0	0		YP_006514863.1	Rv1479	RVBD_1479			transcriptional regulator MoxR1
gi|561108321|ref|NC_018143.2|	1670418	1671372	+	RVBD_1480	3	1	0	0		YP_006514864.1	Rv1480	RVBD_1480			hypothetical protein
gi|561108321|ref|NC_018143.2|	1671382	1672390	+	RVBD_1481	758	988	2	0		YP_006514865.1	Rv1481	RVBD_1481			membrane protein
gi|561108321|ref|NC_018143.2|	1672462	1673305	-	RVBD_1482c	1121	1475	4	2		YP_006514866.1	Rv1482c	RVBD_1482c			hypothetical protein
gi|561108321|ref|NC_018143.2|	1673445	1674189	+	RVBD_1483	11	36	0	1		YP_006514867.1	Rv1483	RVBD_1483			3-oxoacyl-[acyl-carrier-protein] reductase FabG
gi|561108321|ref|NC_018143.2|	1674207	1675017	+	RVBD_1484	1	0	0	0		YP_006514868.1	Rv1484	RVBD_1484			NADH-dependent enoyl-[acyl-carrier-protein] reductase InhA
gi|561108321|ref|NC_018143.2|	1675022	1676057	+	RVBD_1485	0	0	1	0		YP_006514869.1	Rv1485	RVBD_1485			ferrochelatase HemZ
gi|561108321|ref|NC_018143.2|	1676022	1676889	-	RVBD_1486c	628	847	6	5		YP_006514870.1	Rv1486c	RVBD_1486c			hypothetical protein
gi|561108321|ref|NC_018143.2|	1676946	1677381	+	RVBD_1487	94	116	0	0		YP_006514871.1	Rv1487	RVBD_1487			hypothetical protein
gi|561108321|ref|NC_018143.2|	1677402	1678548	+	RVBD_1488	1587	2527	10	3		YP_006514872.1	Rv1488	RVBD_1488			exported protein
gi|561108321|ref|NC_018143.2|	1678557	1678914	+	RVBD_1489	377	545	5	1		YP_006514873.1	Rv1489	RVBD_1489			hypothetical protein
gi|561108321|ref|NC_018143.2|	1678947	1679178	+	RVBD_1489A	83	87	1	1		YP_006514874.1	Rv1489A	RVBD_1489A			methylmalonyl-CoA mutase
gi|561108321|ref|NC_018143.2|	1679327	1680635	+	RVBD_1490	133	195	3	2		YP_006514875.1	Rv1490	RVBD_1490			membrane protein
gi|561108321|ref|NC_018143.2|	1681213	1681972	-	RVBD_1491c	215	226	0	2		YP_006514876.1	Rv1491c	RVBD_1491c			TVP38/TMEM64 family membrane protein
gi|561108321|ref|NC_018143.2|	1682162	1684010	+	RVBD_1492	143	144	2	0		YP_006514877.1	Rv1492	RVBD_1492			methylmalonyl-CoA mutase small subunit MutA
gi|561108321|ref|NC_018143.2|	1684010	1686263	+	RVBD_1493	396	407	16	12		YP_006514878.1	Rv1493	RVBD_1493			methylmalonyl-CoA mutase large subunit MutB
gi|561108321|ref|NC_018143.2|	1686276	1686579	+	RVBD_1494	1215	1319	99	120		YP_006514879.1	Rv1494	RVBD_1494			antitoxin MazE4
gi|561108321|ref|NC_018143.2|	1686575	1686893	+	RVBD_1495	3	5	0	0		YP_006514880.1	Rv1495	RVBD_1495			toxin MazF4
gi|561108321|ref|NC_018143.2|	1686889	1687894	+	RVBD_1496	163	177	1	2		YP_006514881.1	Rv1496	RVBD_1496			LAO/AO transporter ATPase
gi|561108321|ref|NC_018143.2|	1687946	1689236	+	RVBD_1497	505	654	1	2		YP_006514882.1	Rv1497	RVBD_1497			esterase LipL
gi|561108321|ref|NC_018143.2|	1690139	1690352	-	RVBD_1498A	31	53	0	1		YP_006514884.1	Rv1498A	RVBD_1498A			hypothetical protein
gi|561108321|ref|NC_018143.2|	1689308	1689926	-	RVBD_1498c	726	1252	1	2		YP_006514883.1	Rv1498c	RVBD_1498c			methyltransferase
gi|561108321|ref|NC_018143.2|	1690412	1690811	+	RVBD_1499	1437	2878	10	4		YP_006514885.1	Rv1499	RVBD_1499			hypothetical protein
gi|561108321|ref|NC_018143.2|	1690855	1691884	+	RVBD_1500	133	289	0	0		YP_006514886.1	Rv1500	RVBD_1500			glycosyltransferase
gi|561108321|ref|NC_018143.2|	1691895	1692717	+	RVBD_1501	611	1396	3	0		YP_006514887.1	Rv1501	RVBD_1501			hypothetical protein
gi|561108321|ref|NC_018143.2|	1692929	1693829	+	RVBD_1502	57	198	0	0		YP_006514888.1	Rv1502	RVBD_1502			hypothetical protein
gi|561108321|ref|NC_018143.2|	1694001	1695150	-	RvBD_1504c	1513	3633	14	18		Name=TDP-4-oxo-6-deoxy-D-glucose transaminase	Note=frameshift	Dbxref=GeneID:13320098,TubercuList:Rv1504c	description=TDP-4-oxo-6-deoxy-D-glucose transaminase	gbkey=Gene		gene=TDP-4-oxo-6-deoxy-D-glucose transaminase	locus_tag=RVBD_1504c	pseudo=true
gi|561108321|ref|NC_018143.2|	1695286	1695952	-	RVBD_1505c	131	296	1	1		YP_006514889.1	Rv1505c	RVBD_1505c			sialic acid O-acetyltransferase NeuD
gi|561108321|ref|NC_018143.2|	1695948	1696449	-	RVBD_1506c	12	17	0	0		YP_006514890.1	Rv1506c	RVBD_1506c			hypothetical protein
gi|561108321|ref|NC_018143.2|	1697361	1697865	+	RVBD_1507A	49	188	3	4		YP_006514892.1	Rv1507A	RVBD_1507A			hypothetical protein
gi|561108321|ref|NC_018143.2|	1696732	1697428	-	RVBD_1507c	7	14	0	0		YP_006514891.1	Rv1507c	RVBD_1507c			hypothetical protein
gi|561108321|ref|NC_018143.2|	1699871	1700234	+	RVBD_1508A	77	169	1	0		YP_006514894.1	Rv1508A	RVBD_1508A			hypothetical protein
gi|561108321|ref|NC_018143.2|	1698100	1699900	-	RVBD_1508c	1093	2437	3	4		YP_006514893.1	Rv1508c	RVBD_1508c			membrane protein
gi|561108321|ref|NC_018143.2|	1700217	1701099	+	RVBD_1509	33	50	0	0		YP_006514895.1	Rv1509	RVBD_1509			hypothetical protein
gi|561108321|ref|NC_018143.2|	1701300	1702599	+	RVBD_1510	556	962	10	11		YP_006514896.1	Rv1510	RVBD_1510			membrane protein
gi|561108321|ref|NC_018143.2|	1703079	1704102	+	RVBD_1511	2919	4620	18	20		YP_006514898.1	Rv1511	RVBD_1511			GDP-D-mannose dehydratase GmdA
gi|561108321|ref|NC_018143.2|	1704098	1705067	+	RVBD_1512	0	0	0	0		YP_006514899.1	Rv1512	RVBD_1512			nucleotide-sugar epimerase EpiA
gi|561108321|ref|NC_018143.2|	1705063	1705795	+	RVBD_1513	0	0	0	0		YP_006514900.1	Rv1513	RVBD_1513			FkbM family methyltransferase
gi|561108321|ref|NC_018143.2|	1705812	1706601	-	RVBD_1514c	31	95	0	0		YP_006514901.1	Rv1514c	RVBD_1514c			hypothetical protein
gi|561108321|ref|NC_018143.2|	1706635	1707532	-	RVBD_1515c	32	58	3	4		YP_006514902.1	Rv1515c	RVBD_1515c			hypothetical protein
gi|561108321|ref|NC_018143.2|	1707534	1708545	-	RVBD_1516c	136	176	0	2		YP_006514903.1	Rv1516c	RVBD_1516c			sugar transferase
gi|561108321|ref|NC_018143.2|	1708876	1709641	+	RVBD_1517	55	132	0	0		YP_006514904.1	Rv1517	RVBD_1517			hypothetical protein
gi|561108321|ref|NC_018143.2|	1709649	1710609	+	RVBD_1518	507	970	1	2		YP_006514905.1	Rv1518	RVBD_1518			hypothetical protein
gi|561108321|ref|NC_018143.2|	1710738	1711008	+	RVBD_1519	35	56	3	6		YP_006514906.1	Rv1519	RVBD_1519			hypothetical protein
gi|561108321|ref|NC_018143.2|	1711033	1712074	+	RVBD_1520	1713	3774	10	8		YP_006514907.1	Rv1520	RVBD_1520			sugar transferase
gi|561108321|ref|NC_018143.2|	1712307	1714059	+	RVBD_1521	1896	4778	7	12		YP_006514909.1	Rv1521	RVBD_1521			fatty-acid-AMP ligase FadD25
gi|561108321|ref|NC_018143.2|	1714177	1717618	-	RVBD_1522c	1096	2359	5	7		YP_006514910.1	Rv1522c	RVBD_1522c			transmembrane transporter MmpL12
gi|561108321|ref|NC_018143.2|	1717658	1718702	+	RVBD_1523	827	1507	4	2		YP_006514911.1	Rv1523	RVBD_1523			methyltransferase
gi|561108321|ref|NC_018143.2|	1718731	1719976	+	RVBD_1524	143	258	1	0		YP_006514912.1	Rv1524	RVBD_1524			glycosyltransferase
gi|561108321|ref|NC_018143.2|	1720022	1720808	+	RVBD_1525	134	232	2	4		YP_006514913.1	Rv1525	RVBD_1525			rhamnosyl transferase WbbL2
gi|561108321|ref|NC_018143.2|	1720785	1722066	-	RVBD_1526c	709	833	3	2		YP_006514914.1	Rv1526c	RVBD_1526c			glycosyltransferase
gi|561108321|ref|NC_018143.2|	1722088	1728415	-	RVBD_1527c	1689	1851	7	9		YP_006514915.1	Rv1527c	RVBD_1527c			polyketide synthase Pks5
gi|561108321|ref|NC_018143.2|	1728958	1729456	-	RVBD_1528c	184	236	0	0		YP_006514916.1	Rv1528c	RVBD_1528c			polyketide synthase associated protein PapA4
gi|561108321|ref|NC_018143.2|	1729507	1731262	+	RVBD_1529	117	164	0	5		YP_006514917.1	Rv1529	RVBD_1529			fatty-acid-AMP ligase FadD24
gi|561108321|ref|NC_018143.2|	1731378	1732482	+	RVBD_1530	100	103	1	0		YP_006514918.1	Rv1530	RVBD_1530			alcohol dehydrogenase Adh
gi|561108321|ref|NC_018143.2|	1732478	1733045	+	RVBD_1531	22	35	0	0		YP_006514919.1	Rv1531	RVBD_1531			4-carboxymuconolactone decarboxylase
gi|561108321|ref|NC_018143.2|	1733121	1733556	-	RVBD_1532c	706	838	6	2		YP_006514920.1	Rv1532c	RVBD_1532c			hypothetical protein
gi|561108321|ref|NC_018143.2|	1733615	1734743	+	RVBD_1533	81	98	0	1		YP_006514921.1	Rv1533	RVBD_1533			hypothetical protein
gi|561108321|ref|NC_018143.2|	1734739	1735417	+	RVBD_1534	43	99	1	0		YP_006514922.1	Rv1534	RVBD_1534			transcriptional regulator
gi|561108321|ref|NC_018143.2|	1735981	1736218	+	RVBD_1535	1328	1744	1	3		YP_006514923.1	Rv1535	RVBD_1535			hypothetical protein
gi|561108321|ref|NC_018143.2|	1736524	1739650	+	RVBD_1536	0	0	2	0		YP_006514924.1	Rv1536	RVBD_1536			isoleucyl-tRNA synthetase IleS
gi|561108321|ref|NC_018143.2|	1739861	1741253	+	RVBD_1537	115	131	1	0		YP_006514925.1	Rv1537	RVBD_1537			DNA polymerase IV DinX
gi|561108321|ref|NC_018143.2|	1741217	1742198	-	RVBD_1538c	1241	1344	0	0		YP_006514926.1	Rv1538c	RVBD_1538c			L-asparaginase AnsA
gi|561108321|ref|NC_018143.2|	1742249	1742858	+	RVBD_1539	11	25	1	0		YP_006514927.1	Rv1539	RVBD_1539			lipoprotein signal peptidase LspA
gi|561108321|ref|NC_018143.2|	1742850	1743777	+	RVBD_1540	2	0	0	0		YP_006514928.1	Rv1540	RVBD_1540			RluA family pseudouridine synthase
gi|561108321|ref|NC_018143.2|	1743783	1744377	-	RVBD_1541c	106	185	0	0		YP_006514929.1	Rv1541c	RVBD_1541c			lipoprotein LprI
gi|561108321|ref|NC_018143.2|	1744431	1744842	-	RVBD_1542c	63	105	2	2		YP_006514930.1	Rv1542c	RVBD_1542c			hemoglobin GlbN
gi|561108321|ref|NC_018143.2|	1745069	1746095	+	RVBD_1543	8915	7677	10361	11931		YP_006514931.1	Rv1543	RVBD_1543			fatty-acyl-CoA reductase
gi|561108321|ref|NC_018143.2|	1746099	1746903	+	RVBD_1544	180	166	24	12		YP_006514932.1	Rv1544	RVBD_1544			ketoacyl reductase
gi|561108321|ref|NC_018143.2|	1746924	1747152	+	RVBD_1545	75	79	0	1		YP_006514933.1	Rv1545	RVBD_1545			hypothetical protein
gi|561108321|ref|NC_018143.2|	1747200	1747632	+	RVBD_1546	643	832	4	6		YP_006514934.1	Rv1546	RVBD_1546			hypothetical protein
gi|561108321|ref|NC_018143.2|	1747699	1751254	+	RVBD_1547	15	28	0	1		YP_006514935.1	Rv1547	RVBD_1547			DNA polymerase III alpha subunit DnaE1
gi|561108321|ref|NC_018143.2|	1751302	1753339	-	RVBD_1548c	1127	1548	2	3		YP_006514936.1	Rv1548c	RVBD_1548c			PPE family protein PPE21
gi|561108321|ref|NC_018143.2|	1753515	1754043	+	RVBD_1549	1675	2004	20	11		YP_006514937.1	Rv1549	RVBD_1549			fatty-acid-CoA ligase
gi|561108321|ref|NC_018143.2|	1753721	1755437	+	RVBD_1550	366	489	78	101		YP_006514938.1	Rv1550	RVBD_1550			fatty-acid-CoA ligase FadD11
gi|561108321|ref|NC_018143.2|	1755450	1757316	+	RVBD_1551	240	448	2	1		YP_006514939.1	Rv1551	RVBD_1551			glycerol-3-phosphate O-acyltransferase PlsB1
gi|561108321|ref|NC_018143.2|	1757686	1759438	+	RVBD_1552	361	508	2	9		YP_006514941.1	Rv1552	RVBD_1552			fumarate reductase FrdA
gi|561108321|ref|NC_018143.2|	1759440	1760184	+	RVBD_1553	183	306	1	1		YP_006514942.1	Rv1553	RVBD_1553			fumarate reductase FrdB
gi|561108321|ref|NC_018143.2|	1760180	1760561	+	RVBD_1554	387	616	0	0		YP_006514943.1	Rv1554	RVBD_1554			fumarate reductase FrdC
gi|561108321|ref|NC_018143.2|	1760557	1760935	+	RVBD_1555	190	365	0	2		YP_006514944.1	Rv1555	RVBD_1555			fumarate reductase FrdD
gi|561108321|ref|NC_018143.2|	1761002	1761611	+	RVBD_1556	43	61	0	0		YP_006514945.1	Rv1556	RVBD_1556			regulatory protein
gi|561108321|ref|NC_018143.2|	1761749	1762943	+	RVBD_1557	288	375	17	28		YP_006514946.1	Rv1557	RVBD_1557			transmembrane transporter MmpL6
gi|561108321|ref|NC_018143.2|	1762952	1763399	+	RVBD_1558	384	562	9	5		YP_006514947.1	Rv1558	RVBD_1558			deazaflavin-dependent nitroreductase
gi|561108321|ref|NC_018143.2|	1763433	1764723	+	RVBD_1559	3	11	0	0		YP_006514948.1	Rv1559	RVBD_1559			threonine dehydratase IlvA
gi|561108321|ref|NC_018143.2|	1764760	1764979	+	RVBD_1560	0	0	0	0		YP_006514949.1	Rv1560	RVBD_1560			antitoxin VapB11
gi|561108321|ref|NC_018143.2|	1764984	1765389	+	RVBD_1561	6	18	0	0		YP_006514950.1	Rv1561	RVBD_1561			toxin VapC11
gi|561108321|ref|NC_018143.2|	1765405	1767148	-	RVBD_1562c	271	368	2	2		YP_006514951.1	Rv1562c	RVBD_1562c			maltooligosyltrehalose trehalohydrolase TreZ
gi|561108321|ref|NC_018143.2|	1767140	1769438	-	RVBD_1563c	120	143	2	4		YP_006514952.1	Rv1563c	RVBD_1563c			maltooligosyltrehalose synthase TreY
gi|561108321|ref|NC_018143.2|	1769441	1771607	-	RVBD_1564c	986	1373	3	1		YP_006514953.1	Rv1564c	RVBD_1564c			maltooligosyltrehalose synthase TreX
gi|561108321|ref|NC_018143.2|	1771645	1773835	-	RVBD_1565c	15	51	0	0		YP_006514954.1	Rv1565c	RVBD_1565c			hypothetical protein
gi|561108321|ref|NC_018143.2|	1773933	1774626	-	RVBD_1566c	152	189	0	0		YP_006514955.1	Rv1566c	RVBD_1566c			invasion-associated protein
gi|561108321|ref|NC_018143.2|	1774865	1775150	-	RVBD_1567c	1137	1219	2	1		YP_006514956.1	Rv1567c	RVBD_1567c			membrane protein
gi|561108321|ref|NC_018143.2|	1775397	1776711	+	RVBD_1568	2584	2296	8	5		YP_006514957.1	Rv1568	RVBD_1568			adenosylmethionine-8-amino-7-oxononanoate aminotransferase BioA
gi|561108321|ref|NC_018143.2|	1776707	1777868	+	RVBD_1569	268	172	1	2		YP_006514958.1	Rv1569	RVBD_1569			8-amino-7-oxononanoate synthase BioF1
gi|561108321|ref|NC_018143.2|	1777864	1778545	+	RVBD_1570	71	23	2	1		YP_006514959.1	Rv1570	RVBD_1570			dethiobiotin synthetase BioD
gi|561108321|ref|NC_018143.2|	1778544	1779054	+	RVBD_1571	0	0	0	0		YP_006514960.1	Rv1571	RVBD_1571			hypothetical protein
gi|561108321|ref|NC_018143.2|	1779199	1779304	-	RVBD_1572c	6	8	0	0		YP_006514961.1	Rv1572c	RVBD_1572c			hypothetical protein
gi|561108321|ref|NC_018143.2|	1779319	1779730	+	RVBD_1573	0	0	0	0		YP_006514962.1	Rv1573	RVBD_1573			prophage PhiRv1 protein
gi|561108321|ref|NC_018143.2|	1779796	1780660	+	RVBD_1574	22125	20217	19	7		YP_006514963.1	Rv1574	RVBD_1574			prophage PhiRv1 protein
gi|561108321|ref|NC_018143.2|	1780649	1782071	-	RVBD_1576c	1236	1044	1	1		YP_006514964.1	Rv1576c	RVBD_1576c			prophage PhiRv1 protein
gi|561108321|ref|NC_018143.2|	1782078	1782591	-	RVBD_1577c	899	829	1	1		YP_006514965.1	Rv1577c	RVBD_1577c			prophage PhiRv1 protein
gi|561108321|ref|NC_018143.2|	1782764	1783235	-	RVBD_1578c	0	0	0	0		YP_006514966.1	Rv1578c	RVBD_1578c			prophage PhiRv1 protein
gi|561108321|ref|NC_018143.2|	1783315	1783630	-	RVBD_1579c	12	15	1	0		YP_006514967.1	Rv1579c	RVBD_1579c			prophage PhiRv1 protein
gi|561108321|ref|NC_018143.2|	1783626	1783899	-	RVBD_1580c	69	78	0	0		YP_006514968.1	Rv1580c	RVBD_1580c			prophage PhiRv1 protein
gi|561108321|ref|NC_018143.2|	1783912	1784308	-	RVBD_1581c	165	170	0	0		YP_006514969.1	Rv1581c	RVBD_1581c			prophage PhiRv1 protein
gi|561108321|ref|NC_018143.2|	1784503	1785919	-	RVBD_1582c	3267	3017	6	7		YP_006514971.1	Rv1582c	RVBD_1582c			prophage PhiRv1 protein
gi|561108321|ref|NC_018143.2|	1785918	1786317	-	RVBD_1583c	79	54	0	0		YP_006514972.1	Rv1583c	RVBD_1583c			prophage PhiRv1 protein
gi|561108321|ref|NC_018143.2|	1786313	1786535	-	RVBD_1584c	114	107	0	1		YP_006514973.1	Rv1584c	RVBD_1584c			prophage PhiRv1 protein
gi|561108321|ref|NC_018143.2|	1786590	1787106	-	RVBD_1585c	2131	1783	15	20		YP_006514974.1	Rv1585c	RVBD_1585c			prophage PhiRv1 protein
gi|561108321|ref|NC_018143.2|	1787102	1788512	-	RVBD_1586c	1397	1338	5	1		YP_006514975.1	Rv1586c	RVBD_1586c			prophage PhiRv1 integrase
gi|561108321|ref|NC_018143.2|	1788168	1789170	-	RVBD_1587c	396	446	1	0		YP_006514976.1	Rv1587c	RVBD_1587c			13E12 repeat family protein
gi|561108321|ref|NC_018143.2|	1789174	1789843	-	RVBD_1588c	627	597	14	16		YP_006514977.1	Rv1588c	RVBD_1588c			13E12 repeat family protein
gi|561108321|ref|NC_018143.2|	1790290	1791340	+	RVBD_1589	296	383	0	0		YP_006514978.1	Rv1589	RVBD_1589			biotin synthetase BioB
gi|561108321|ref|NC_018143.2|	1791340	1791580	+	RVBD_1590	1110	1213	5	0		YP_006514979.1	Rv1590	RVBD_1590			hypothetical protein
gi|561108321|ref|NC_018143.2|	1791576	1792242	+	RVBD_1591	1446	1612	1	0		YP_006514980.1	Rv1591	RVBD_1591			transmembrane protein
gi|561108321|ref|NC_018143.2|	1792406	1793747	-	RVBD_1592c	136	145	0	1		YP_006514981.1	Rv1592c	RVBD_1592c			triacylglycerol lipase
gi|561108321|ref|NC_018143.2|	1794003	1794714	-	RVBD_1593c	81	138	0	0		YP_006514982.1	Rv1593c	RVBD_1593c			hypothetical protein
gi|561108321|ref|NC_018143.2|	1794762	1795812	+	RVBD_1594	9	7	0	0		YP_006514983.1	Rv1594	RVBD_1594			quinolinate synthetase NadA
gi|561108321|ref|NC_018143.2|	1795811	1797395	+	RVBD_1595	0	0	0	0		YP_006514984.1	Rv1595	RVBD_1595			l-aspartate oxidase NadB
gi|561108321|ref|NC_018143.2|	1797394	1798252	+	RVBD_1596	29	85	2	2		YP_006514985.1	Rv1596	RVBD_1596			nicotinate-nucleotide pyrophosphatase NadC
gi|561108321|ref|NC_018143.2|	1798300	1799059	+	RVBD_1597	329	334	2	1		YP_006514986.1	Rv1597	RVBD_1597			hypothetical protein
gi|561108321|ref|NC_018143.2|	1799079	1799490	-	RVBD_1598c	597	575	2	1		YP_006514987.1	Rv1598c	RVBD_1598c			deazaflavin-dependent nitroreductase
gi|561108321|ref|NC_018143.2|	1799589	1800906	+	RVBD_1599	0	0	0	0		YP_006514988.1	Rv1599	RVBD_1599			histidinol dehydrogenase HisD
gi|561108321|ref|NC_018143.2|	1800902	1802045	+	RVBD_1600	2	0	0	1		YP_006514989.1	Rv1600	RVBD_1600			histidinol-phosphate aminotransferase HisC1
gi|561108321|ref|NC_018143.2|	1802041	1802674	+	RVBD_1601	0	0	0	0		YP_006514990.1	Rv1601	RVBD_1601			imidazole glycerol phosphate dehydratase HisB
gi|561108321|ref|NC_018143.2|	1802670	1803291	+	RVBD_1602	0	0	1	0		YP_006514991.1	Rv1602	RVBD_1602			amidotransferase HisH
gi|561108321|ref|NC_018143.2|	1803300	1804038	+	RVBD_1603	0	0	0	0		YP_006514992.1	Rv1603	RVBD_1603			phosphoribosyl isomerase A HisA
gi|561108321|ref|NC_018143.2|	1804045	1804858	+	RVBD_1604	28	22	0	0		YP_006514993.1	Rv1604	RVBD_1604			inositol-1-monophosphatase ImpA
gi|561108321|ref|NC_018143.2|	1804859	1805663	+	RVBD_1605	10	10	0	0		YP_006514994.1	Rv1605	RVBD_1605			imidazole glycerol phosphate synthase subunit HisF
gi|561108321|ref|NC_018143.2|	1805659	1806007	+	RVBD_1606	3	1	0	0		YP_006514995.1	Rv1606	RVBD_1606			phosphoribosyl-AMP 1
gi|561108321|ref|NC_018143.2|	1806187	1807270	+	RVBD_1607	46	55	1	0		YP_006514996.1	Rv1607	RVBD_1607			ionic transporter integral membrane protein ChaA
gi|561108321|ref|NC_018143.2|	1807304	1807769	-	RVBD_1608c	843	874	4	7		YP_006514997.1	Rv1608c	RVBD_1608c			peroxidoxin BcpB
gi|561108321|ref|NC_018143.2|	1807909	1809460	+	RVBD_1609	0	2	0	0		YP_006514998.1	Rv1609	RVBD_1609			anthranilate synthase component 1 TrpE
gi|561108321|ref|NC_018143.2|	1809449	1810157	+	RVBD_1610	41	24	0	0		YP_006514999.1	Rv1610	RVBD_1610			membrane protein
gi|561108321|ref|NC_018143.2|	1810246	1811065	+	RVBD_1611	1	0	0	0		YP_006515000.1	Rv1611	RVBD_1611			indole-3-glycerol phosphate synthase TrpC
gi|561108321|ref|NC_018143.2|	1811133	1812366	+	RVBD_1612	1	0	1	0		YP_006515001.1	Rv1612	RVBD_1612			tryptophan synthase beta subunit TrpB
gi|561108321|ref|NC_018143.2|	1812365	1813178	+	RVBD_1613	0	1	0	0		YP_006515002.1	Rv1613	RVBD_1613			tryptophan synthase alpha subunit TrpA
gi|561108321|ref|NC_018143.2|	1813177	1814584	+	RVBD_1614	19	25	0	0		YP_006515003.1	Rv1614	RVBD_1614			prolipoprotein diacylglyceryl transferase Lgt
gi|561108321|ref|NC_018143.2|	1815259	1815700	+	RVBD_1615	205	247	1	2		YP_006515004.1	Rv1615	RVBD_1615			membrane protein
gi|561108321|ref|NC_018143.2|	1815689	1816088	+	RVBD_1616	277	333	2	2		YP_006515005.1	Rv1616	RVBD_1616			hypothetical protein
gi|561108321|ref|NC_018143.2|	1816195	1817614	+	RVBD_1617	0	0	0	0		YP_006515006.1	Rv1617	RVBD_1617			pyruvate kinase PykA
gi|561108321|ref|NC_018143.2|	1817621	1818524	+	RVBD_1618	423	366	0	1		YP_006515007.1	Rv1618	RVBD_1618			acyl-CoA thioesterase II TesB1
gi|561108321|ref|NC_018143.2|	1818581	1820036	+	RVBD_1619	275	258	0	0		YP_006515008.1	Rv1619	RVBD_1619			hypothetical protein
gi|561108321|ref|NC_018143.2|	1819969	1821700	-	RVBD_1620c	1	21	0	1		YP_006515009.1	Rv1620c	RVBD_1620c			thiol reductant ABC exporter subunit CydC
gi|561108321|ref|NC_018143.2|	1821696	1823280	-	RVBD_1621c	6	27	0	0		YP_006515010.1	Rv1621c	RVBD_1621c			thiol reductant ABC exporter subunit CydD
gi|561108321|ref|NC_018143.2|	1823366	1824407	-	RVBD_1622c	24	157	0	1		YP_006515011.1	Rv1622c	RVBD_1622c			integral membrane cytochrome D ubiquinol oxidase CydB
gi|561108321|ref|NC_018143.2|	1824436	1825894	-	RVBD_1623c	171	730	0	0		YP_006515012.1	Rv1623c	RVBD_1623c			integral membrane cytochrome D ubiquinol oxidase CydA
gi|561108321|ref|NC_018143.2|	1826004	1826592	-	RVBD_1624c	633	915	6	11		YP_006515013.1	Rv1624c	RVBD_1624c			membrane protein
gi|561108321|ref|NC_018143.2|	1826620	1827952	-	RVBD_1625c	3308	4366	25	22		YP_006515014.1	Rv1625c	RVBD_1625c			adenylyl cyclase Cya
gi|561108321|ref|NC_018143.2|	1828186	1828804	+	RVBD_1626	124	196	0	0		YP_006515015.1	Rv1626	RVBD_1626			two-component system transcriptional regulator
gi|561108321|ref|NC_018143.2|	1828871	1830080	-	RVBD_1627c	800	783	1	2		YP_006515016.1	Rv1627c	RVBD_1627c			nonspecific lipid-transfer protein
gi|561108321|ref|NC_018143.2|	1830076	1830568	-	RVBD_1628c	314	363	4	3		YP_006515017.1	Rv1628c	RVBD_1628c			hypothetical protein
gi|561108321|ref|NC_018143.2|	1830671	1833386	+	RVBD_1629	16	32	0	0		YP_006515018.1	Rv1629	RVBD_1629			DNA polymerase I PolA
gi|561108321|ref|NC_018143.2|	1833548	1834994	+	RVBD_1630	0	0	2	0		YP_006515019.1	Rv1630	RVBD_1630			30S ribosomal protein S1 RpsA
gi|561108321|ref|NC_018143.2|	1835019	1836243	+	RVBD_1631	8	0	0	0		YP_006515020.1	Rv1631	RVBD_1631			dephospho-CoA kinase CoaE
gi|561108321|ref|NC_018143.2|	1836393	1836837	-	RVBD_1632c	361	338	9	10		YP_006515021.1	Rv1632c	RVBD_1632c			hypothetical protein
gi|561108321|ref|NC_018143.2|	1837081	1839178	+	RVBD_1633	1046	1305	2	1		YP_006515022.1	Rv1633	RVBD_1633			excinuclease ABC UvrB
gi|561108321|ref|NC_018143.2|	1839174	1840590	+	RVBD_1634	5083	4899	9	14		YP_006515023.1	Rv1634	RVBD_1634			drug efflux membrane protein
gi|561108321|ref|NC_018143.2|	1840578	1842249	-	RVBD_1635c	3278	3918	19	31		YP_006515024.1	Rv1635c	RVBD_1635c			polyprenol phosphomannose-dependent ManLAM-capping mannosyltransferase
gi|561108321|ref|NC_018143.2|	1842457	1842898	+	RVBD_1636	10	13	0	0		YP_006515026.1	Rv1636	RVBD_1636			iron-regulated universal stress protein family protein
gi|561108321|ref|NC_018143.2|	1842904	1843699	-	RVBD_1637c	370	429	3	6		YP_006515027.1	Rv1637c	RVBD_1637c			hypothetical protein
gi|561108321|ref|NC_018143.2|	1843747	1846666	+	RVBD_1638	467	655	0	1		YP_006515028.1	Rv1638	RVBD_1638			excinuclease ABC UvrA
gi|561108321|ref|NC_018143.2|	1846722	1846980	-	RVBD_1638A	42	23	3	1		YP_006515029.1	Rv1638A	RVBD_1638A			hypothetical protein
gi|561108321|ref|NC_018143.2|	1846995	1848465	-	RVBD_1639c	212	209	2	0		YP_006515030.1	Rv1639c	RVBD_1639c			hypothetical protein
gi|561108321|ref|NC_018143.2|	1848523	1852042	-	RVBD_1640c	221	491	22	21		YP_006515031.1	Rv1640c	RVBD_1640c			lysyl-tRNA synthetase 2 LysX
gi|561108321|ref|NC_018143.2|	1852279	1852885	+	RVBD_1641	5	0	0	0		YP_006515032.2	Rv1641	RVBD_1641			initiation factor if-3 InfC
gi|561108321|ref|NC_018143.2|	1852934	1853129	+	RVBD_1642	0	0	0	0		YP_006515033.1	Rv1642	RVBD_1642			50S ribosomal protein L35 RpmI
gi|561108321|ref|NC_018143.2|	1853190	1853580	+	RVBD_1643	0	3	0	0		YP_006515034.1	Rv1643	RVBD_1643			50S ribosomal protein L20 RplT
gi|561108321|ref|NC_018143.2|	1853612	1854395	+	RVBD_1644	2606	2549	8	10		YP_006515035.1	Rv1644	RVBD_1644			23S rRNA methyltransferase TsnR
gi|561108321|ref|NC_018143.2|	1854405	1855461	-	RVBD_1645c	2198	2269	7	10		YP_006515036.1	Rv1645c	RVBD_1645c			hypothetical protein
gi|561108321|ref|NC_018143.2|	1855770	1856703	+	RVBD_1646	5171	4950	9	12		YP_006515037.1	Rv1646	RVBD_1646			PE family protein PE17
gi|561108321|ref|NC_018143.2|	1856780	1857731	+	RVBD_1647	272	240	0	0		YP_006515038.1	Rv1647	RVBD_1647			adenylate cyclase
gi|561108321|ref|NC_018143.2|	1857737	1858544	+	RVBD_1648	3607	3454	8	3		YP_006515039.1	Rv1648	RVBD_1648			transmembrane protein
gi|561108321|ref|NC_018143.2|	1858739	1859765	+	RVBD_1649	0	0	0	0		YP_006515040.1	Rv1649	RVBD_1649			phenylalanyl-tRNA synthetase alpha chain PheS
gi|561108321|ref|NC_018143.2|	1859764	1862260	+	RVBD_1650	0	0	0	1		YP_006515041.1	Rv1650	RVBD_1650			phenylalanyl-tRNA synthetase beta chain PheT
gi|561108321|ref|NC_018143.2|	1862353	1865389	-	RVBD_1651c	1433	977	7	5		YP_006515042.1	Rv1651c	RVBD_1651c			PE-PGRS family protein PE_PGRS30
gi|561108321|ref|NC_018143.2|	1865582	1866641	+	RVBD_1652	0	0	0	0		YP_006515043.1	Rv1652	RVBD_1652			N-acetyl-gamma-glutamyl-phosphate reductase ArgC
gi|561108321|ref|NC_018143.2|	1866637	1867852	+	RVBD_1653	0	0	0	1		YP_006515044.1	Rv1653	RVBD_1653			glutamate N-acetyltransferase ArgJ
gi|561108321|ref|NC_018143.2|	1867848	1868733	+	RVBD_1654	0	0	0	1		YP_006515045.1	Rv1654	RVBD_1654			acetylglutamate kinase ArgB
gi|561108321|ref|NC_018143.2|	1868729	1869932	+	RVBD_1655	0	0	0	0		YP_006515046.1	Rv1655	RVBD_1655			acetylornithine aminotransferase ArgD
gi|561108321|ref|NC_018143.2|	1869928	1870852	+	RVBD_1656	0	0	0	0		YP_006515047.1	Rv1656	RVBD_1656			ornithine carbamoyltransferase
gi|561108321|ref|NC_018143.2|	1870848	1871361	+	RVBD_1657	182	131	10	8		YP_006515048.1	Rv1657	RVBD_1657			arginine repressor ArgR
gi|561108321|ref|NC_018143.2|	1871369	1872566	+	RVBD_1658	0	0	0	0		YP_006515049.1	Rv1658	RVBD_1658			argininosuccinate synthase ArgG
gi|561108321|ref|NC_018143.2|	1872645	1874058	+	RVBD_1659	0	1	0	0		YP_006515050.1	Rv1659	RVBD_1659			argininosuccinate lyase ArgH
gi|561108321|ref|NC_018143.2|	1874166	1875228	+	RVBD_1660	104	82	0	0		YP_006515051.1	Rv1660	RVBD_1660			chalcone synthase Pks10
gi|561108321|ref|NC_018143.2|	1875310	1881691	+	RVBD_1661	1017	944	6	2		YP_006515052.1	Rv1661	RVBD_1661			polyketide synthase Pks7
gi|561108321|ref|NC_018143.2|	1881710	1886519	+	RVBD_1662	67	138	3	1		YP_006515053.1	Rv1662	RVBD_1662			polyketide synthase Pks8
gi|561108321|ref|NC_018143.2|	1886518	1888027	+	RVBD_1663	33	67	0	0		YP_006515054.1	Rv1663	RVBD_1663			polyketide synthase Pks17
gi|561108321|ref|NC_018143.2|	1888032	1891086	+	RVBD_1664	435	521	1	1		YP_006515055.1	Rv1664	RVBD_1664			polyketide synthase Pks9
gi|561108321|ref|NC_018143.2|	1891232	1892294	+	RVBD_1665	378	512	2	3		YP_006515056.1	Rv1665	RVBD_1665			chalcone synthase Pks11
gi|561108321|ref|NC_018143.2|	1892276	1893569	-	RVBD_1666c	461	458	2	2		YP_006515057.1	Rv1666c	RVBD_1666c			cytochrome P450 139 Cyp139
gi|561108321|ref|NC_018143.2|	1893583	1894237	-	RVBD_1667c	393	402	2	3		YP_006515058.1	Rv1667c	RVBD_1667c			ABC macrolide transporter ATP-binding protein
gi|561108321|ref|NC_018143.2|	1894230	1895349	-	RVBD_1668c	90	71	2	6		YP_006515059.1	Rv1668c	RVBD_1668c			ABC macrolide transporter ATP-binding protein
gi|561108321|ref|NC_018143.2|	1895731	1896094	+	RVBD_1669	69	77	0	0		YP_006515060.1	Rv1669	RVBD_1669			hypothetical protein
gi|561108321|ref|NC_018143.2|	1896126	1896474	+	RVBD_1670	367	439	0	0		YP_006515061.1	Rv1670	RVBD_1670			hypothetical protein
gi|561108321|ref|NC_018143.2|	1896481	1896874	+	RVBD_1671	23	33	0	0		YP_006515062.1	Rv1671	RVBD_1671			membrane protein
gi|561108321|ref|NC_018143.2|	1896882	1898214	-	RVBD_1672c	66	100	1	0		YP_006515063.1	Rv1672c	RVBD_1672c			integral membrane transporter
gi|561108321|ref|NC_018143.2|	1898306	1899239	-	RVBD_1673c	321	366	1	4		YP_006515064.1	Rv1673c	RVBD_1673c			hypothetical protein
gi|561108321|ref|NC_018143.2|	1899266	1899923	-	RVBD_1674c	169	130	2	1		YP_006515065.1	Rv1674c	RVBD_1674c			transcriptional regulator
gi|561108321|ref|NC_018143.2|	1900247	1900982	-	RVBD_1675c	635	728	1	1		YP_006515067.1	Rv1675c	RVBD_1675c			transcriptional regulator Cmr
gi|561108321|ref|NC_018143.2|	1901053	1901758	+	RVBD_1676	12	13	1	0		YP_006515068.1	Rv1676	RVBD_1676			hypothetical protein
gi|561108321|ref|NC_018143.2|	1901754	1902303	+	RVBD_1677	41	33	0	0		YP_006515069.1	Rv1677	RVBD_1677			lipoprotein DsbF
gi|561108321|ref|NC_018143.2|	1902403	1903306	+	RVBD_1678	52	57	0	0		YP_006515070.1	Rv1678	RVBD_1678			membrane protein
gi|561108321|ref|NC_018143.2|	1903305	1904427	+	RVBD_1679	117	122	0	0		YP_006515071.1	Rv1679	RVBD_1679			acyl-CoA dehydrogenase FadE16
gi|561108321|ref|NC_018143.2|	1904435	1905260	+	RVBD_1680	443	396	6	7		YP_006515072.1	Rv1680	RVBD_1680			hypothetical protein
gi|561108321|ref|NC_018143.2|	1905256	1906249	+	RVBD_1681	299	543	5	2		YP_006515073.1	Rv1681	RVBD_1681			molybdopterin biosynthesis protein MoeX
gi|561108321|ref|NC_018143.2|	1906409	1907327	+	RVBD_1682	460	614	0	3		YP_006515074.1	Rv1682	RVBD_1682			DivIVA family protein
gi|561108321|ref|NC_018143.2|	1907600	1910600	+	RVBD_1683	206	182	1	4		YP_006515075.1	Rv1683	RVBD_1683			bifunctional enzyme long-chain acyl-CoA synthase and lipase
gi|561108321|ref|NC_018143.2|	1910592	1910817	+	RVBD_1684	0	0	0	0		YP_006515076.1	Rv1684	RVBD_1684			hypothetical protein
gi|561108321|ref|NC_018143.2|	1910782	1911406	-	RVBD_1685c	24	67	0	1		YP_006515077.1	Rv1685c	RVBD_1685c			hypothetical protein
gi|561108321|ref|NC_018143.2|	1911407	1912088	-	RVBD_1686c	12	27	0	0		YP_006515078.1	Rv1686c	RVBD_1686c			ABC transporter efflux protein DrrB
gi|561108321|ref|NC_018143.2|	1912159	1912927	-	RVBD_1687c	102	122	1	1		YP_006515079.1	Rv1687c	RVBD_1687c			ABC transporter ATP-binding protein
gi|561108321|ref|NC_018143.2|	1912985	1913597	+	RVBD_1688	65	118	0	0		YP_006515080.1	Rv1688	RVBD_1688			3-methyladenine DNA glycosylase Mpg
gi|561108321|ref|NC_018143.2|	1913608	1914883	+	RVBD_1689	10	5	0	0		YP_006515081.1	Rv1689	RVBD_1689			tyrosyl-tRNA synthase TyrS
gi|561108321|ref|NC_018143.2|	1915533	1915917	+	RVBD_1690	13	18	1	1		YP_006515082.1	Rv1690	RVBD_1690			lipoprotein LprJ
gi|561108321|ref|NC_018143.2|	1915955	1916708	+	RVBD_1691	23	20	0	0		YP_006515083.1	Rv1691	RVBD_1691			hypothetical protein
gi|561108321|ref|NC_018143.2|	1916704	1917766	+	RVBD_1692	860	747	0	1		YP_006515084.1	Rv1692	RVBD_1692			HAD hydrolase
gi|561108321|ref|NC_018143.2|	1917762	1917939	+	RVBD_1693	248	270	0	0		YP_006515085.1	Rv1693	RVBD_1693			hypothetical protein
gi|561108321|ref|NC_018143.2|	1917946	1918753	+	RVBD_1694	769	876	26	46		YP_006515086.1	Rv1694	RVBD_1694			2'-O-methyltransferase TlyA
gi|561108321|ref|NC_018143.2|	1918752	1919676	+	RVBD_1695	1	0	0	0		YP_006515087.1	Rv1695	RVBD_1695			inorganic polyphosphate/ATP-NAD kinase PpnK
gi|561108321|ref|NC_018143.2|	1919689	1921453	+	RVBD_1696	73	89	1	0		YP_006515088.1	Rv1696	RVBD_1696			DNA repair protein RecN
gi|561108321|ref|NC_018143.2|	1921548	1922730	+	RVBD_1697	0	0	0	1		YP_006515089.1	Rv1697	RVBD_1697			hypothetical protein
gi|561108321|ref|NC_018143.2|	1922751	1923696	+	RVBD_1698	1010	951	0	2		YP_006515090.1	Rv1698	RVBD_1698			outer membrane protein MctB
gi|561108321|ref|NC_018143.2|	1923835	1925596	+	RVBD_1699	8	14	0	0		YP_006515091.1	Rv1699	RVBD_1699			CTP synthase PyrG
gi|561108321|ref|NC_018143.2|	1925588	1926212	+	RVBD_1700	91	81	1	0		YP_006515092.1	Rv1700	RVBD_1700			ADP-ribose pyrophosphatase
gi|561108321|ref|NC_018143.2|	1926208	1927144	+	RVBD_1701	33	49	0	0		YP_006515093.1	Rv1701	RVBD_1701			tyrosine recombinase xerD
gi|561108321|ref|NC_018143.2|	1927217	1928582	-	RVBD_1702c	397	406	3	5		YP_006515094.1	Rv1702c	RVBD_1702c			hypothetical protein
gi|561108321|ref|NC_018143.2|	1929137	1929887	-	RVBD_1703c	1826	1813	3	4		YP_006515096.1	Rv1703c	RVBD_1703c			catechol-O-methyltransferase
gi|561108321|ref|NC_018143.2|	1929792	1931463	-	RVBD_1704c	627	660	2	2		YP_006515097.1	Rv1704c	RVBD_1704c			d-serine/alanine/glycine transporter CycA
gi|561108321|ref|NC_018143.2|	1931503	1932661	-	RVBD_1705c	728	648	5	2		YP_006515098.1	Rv1705c	RVBD_1705c			PPE family protein PPE22
gi|561108321|ref|NC_018143.2|	1934488	1934656	-	RVBD_1706A	84	100	0	2		YP_006515101.1	Rv1706A	RVBD_1706A			hypothetical protein
gi|561108321|ref|NC_018143.2|	1932700	1933885	-	RVBD_1706c	1093	949	6	15		YP_006515099.1	Rv1706c	RVBD_1706c			PPE family protein PPE23
gi|561108321|ref|NC_018143.2|	1934888	1936349	+	RVBD_1707	826	1183	1	4		YP_006515102.1	Rv1707	RVBD_1707			SulP family sulfate permease
gi|561108321|ref|NC_018143.2|	1936366	1937323	+	RVBD_1708	0	0	0	0		YP_006515103.1	Rv1708	RVBD_1708			chromosome partitioning protein
gi|561108321|ref|NC_018143.2|	1937319	1938156	+	RVBD_1709	53	174	1	1		YP_006515104.1	Rv1709	RVBD_1709			segregation and condensation protein ScpA
gi|561108321|ref|NC_018143.2|	1938152	1938848	+	RVBD_1710	492	1282	3	1		YP_006515105.1	Rv1710	RVBD_1710			segregation and condensation protein ScpB
gi|561108321|ref|NC_018143.2|	1938844	1939609	+	RVBD_1711	0	0	0	0		YP_006515106.1	Rv1711	RVBD_1711			pseudouridine synthase
gi|561108321|ref|NC_018143.2|	1939605	1940298	+	RVBD_1712	3	5	0	0		YP_006515107.1	Rv1712	RVBD_1712			cytidylate kinase Cmk
gi|561108321|ref|NC_018143.2|	1940294	1941686	+	RVBD_1713	0	0	0	0		YP_006515108.1	Rv1713	RVBD_1713			GTP-binding protein EngA
gi|561108321|ref|NC_018143.2|	1941859	1942672	+	RVBD_1714	422	361	0	0		YP_006515109.1	Rv1714	RVBD_1714			oxidoreductase
gi|561108321|ref|NC_018143.2|	1942665	1943580	+	RVBD_1715	133	117	0	0		YP_006515110.1	Rv1715	RVBD_1715			3-hydroxybutyryl-CoA dehydrogenase FadB3
gi|561108321|ref|NC_018143.2|	1943582	1944413	+	RVBD_1716	130	114	2	5		YP_006515111.1	Rv1716	RVBD_1716			arylformamidase
gi|561108321|ref|NC_018143.2|	1944412	1944763	+	RVBD_1717	123	96	0	0		YP_006515112.1	Rv1717	RVBD_1717			hypothetical protein
gi|561108321|ref|NC_018143.2|	1944815	1945634	+	RVBD_1718	55	42	1	1		YP_006515113.1	Rv1718	RVBD_1718			hypothetical protein
gi|561108321|ref|NC_018143.2|	1945647	1946427	+	RVBD_1719	49	37	0	0		YP_006515114.1	Rv1719	RVBD_1719			transcriptional regulator
gi|561108321|ref|NC_018143.2|	1947036	1947426	-	RVBD_1720c	319	142	0	0		YP_006515116.1	Rv1720c	RVBD_1720c			toxin VapC12
gi|561108321|ref|NC_018143.2|	1947422	1947650	-	RVBD_1721c	25	34	1	0		YP_006515117.1	Rv1721c	RVBD_1721c			antitoxin VapB12
gi|561108321|ref|NC_018143.2|	1947867	1949352	+	RVBD_1722	2765	1787	7	9		YP_006515118.1	Rv1722	RVBD_1722			carboxylase
gi|561108321|ref|NC_018143.2|	1949348	1950596	+	RVBD_1723	566	473	2	6		YP_006515119.1	Rv1723	RVBD_1723			hydrolase
gi|561108321|ref|NC_018143.2|	1950638	1951058	-	RVBD_1724c	718	630	6	7		YP_006515120.1	Rv1724c	RVBD_1724c			hypothetical protein
gi|561108321|ref|NC_018143.2|	1951047	1951758	-	RVBD_1725c	618	518	15	5		YP_006515121.1	Rv1725c	RVBD_1725c			hypothetical protein
gi|561108321|ref|NC_018143.2|	1951858	1953244	+	RVBD_1726	285	247	1	2		YP_006515122.1	Rv1726	RVBD_1726			oxidoreductase
gi|561108321|ref|NC_018143.2|	1953276	1953846	+	RVBD_1727	106	128	0	0		YP_006515123.1	Rv1727	RVBD_1727			hypothetical protein
gi|561108321|ref|NC_018143.2|	1953870	1954641	-	RVBD_1728c	172	328	2	3		YP_006515124.1	Rv1728c	RVBD_1728c			NLP/P60 family protein
gi|561108321|ref|NC_018143.2|	1954637	1955576	-	RVBD_1729c	49	48	0	0		YP_006515125.1	Rv1729c	RVBD_1729c			s-adenosylmethionine-dependent methyltransferase
gi|561108321|ref|NC_018143.2|	1955698	1957252	-	RVBD_1730c	44	78	0	0		YP_006515126.1	Rv1730c	RVBD_1730c			penicillin-binding protein
gi|561108321|ref|NC_018143.2|	1957683	1959240	+	RVBD_1731	1083	1249	0	0		YP_006515127.1	Rv1731	RVBD_1731			succinate-semialdehyde dehydrogenase GabD2
gi|561108321|ref|NC_018143.2|	1959249	1959798	-	RVBD_1732c	58	57	0	0		YP_006515128.1	Rv1732c	RVBD_1732c			hypothetical protein
gi|561108321|ref|NC_018143.2|	1959861	1960494	-	RVBD_1733c	21	51	0	0		YP_006515129.1	Rv1733c	RVBD_1733c			transmembrane protein
gi|561108321|ref|NC_018143.2|	1960780	1961023	-	RVBD_1734c	40	64	0	0		YP_006515131.1	Rv1734c	RVBD_1734c			pyruvate dehydrogenase E2 component (dihydrolipoamide acetyltransferase)
gi|561108321|ref|NC_018143.2|	1961893	1962136	-	RVBD_1735Ac	25	30	0	0		YP_006515133.1	Rv1735Ac	RVBD_1735Ac			hypothetical protein
gi|561108321|ref|NC_018143.2|	1961297	1961795	-	RVBD_1735c	81	169	0	1		YP_006515132.2	Rv1735c	RVBD_1735c			membrane protein
gi|561108321|ref|NC_018143.2|	1962234	1964193	-	RVBD_1736c	737	547	2	1		YP_006515134.1	Rv1736c	RVBD_1736c			nitrate reductase NarX
gi|561108321|ref|NC_018143.2|	1964189	1965377	-	RVBD_1737c	149	100	3	0		YP_006515135.1	Rv1737c	RVBD_1737c			nitrate/nitrite transporter NarK2
gi|561108321|ref|NC_018143.2|	1965663	1965948	+	RVBD_1738	84	95	11	9		YP_006515136.1	Rv1738	RVBD_1738			hypothetical protein
gi|561108321|ref|NC_018143.2|	1965961	1967644	-	RVBD_1739c	320	378	0	3		YP_006515137.1	Rv1739c	RVBD_1739c			sulfate-transport ABC transporter transmembrane protein
gi|561108321|ref|NC_018143.2|	1967711	1967924	+	RVBD_1740	119	110	1	1		YP_006515138.1	Rv1740	RVBD_1740			antitoxin VapB34
gi|561108321|ref|NC_018143.2|	1967923	1968172	+	RVBD_1741	81	94	0	0		YP_006515139.1	Rv1741	RVBD_1741			toxin VapC34
gi|561108321|ref|NC_018143.2|	1968179	1968917	+	RVBD_1742	224	206	2	1		YP_006515140.1	Rv1742	RVBD_1742			hypothetical protein
gi|561108321|ref|NC_018143.2|	1969010	1970711	+	RVBD_1743	2170	1833	47	51		YP_006515141.1	Rv1743	RVBD_1743			transmembrane serine/threonine-protein kinase E PknE
gi|561108321|ref|NC_018143.2|	1970995	1971397	-	RVBD_1744c	2961	2184	6	5		YP_006515142.1	Rv1744c	RVBD_1744c			membrane protein
gi|561108321|ref|NC_018143.2|	1971386	1971998	-	RVBD_1745c	91	144	1	0		YP_006515143.1	Rv1745c	RVBD_1745c			isopentenyl-diphosphate delta-isomerase Idi
gi|561108321|ref|NC_018143.2|	1972144	1973575	+	RVBD_1746	690	587	0	0		YP_006515144.1	Rv1746	RVBD_1746			serine/threonine-protein kinase PknF
gi|561108321|ref|NC_018143.2|	1973636	1976234	+	RVBD_1747	988	1205	1	0		YP_006515145.1	Rv1747	RVBD_1747			transmembrane ABC transporter ATP-binding protein
gi|561108321|ref|NC_018143.2|	1976606	1977338	+	RVBD_1748	1586	1670	4	5		YP_006515146.1	Rv1748	RVBD_1748			hypothetical protein
gi|561108321|ref|NC_018143.2|	1977334	1977892	-	RVBD_1749c	1888	2187	6	10		YP_006515147.1	Rv1749c	RVBD_1749c			integral membrane protein
gi|561108321|ref|NC_018143.2|	1977975	1979574	-	RVBD_1750c	1424	1880	12	10		YP_006515148.1	Rv1750c	RVBD_1750c			fatty-acid-CoA ligase FadD1
gi|561108321|ref|NC_018143.2|	1979627	1981010	+	RVBD_1751	151	185	0	1		YP_006515149.1	Rv1751	RVBD_1751			oxidoreductase
gi|561108321|ref|NC_018143.2|	1981136	1981586	+	RVBD_1752	0	1	0	0		YP_006515150.1	Rv1752	RVBD_1752			hypothetical protein
gi|561108321|ref|NC_018143.2|	1981620	1984782	-	RVBD_1753c	96	155	4	3		YP_006515151.1	Rv1753c	RVBD_1753c			PPE family protein PPE24
gi|561108321|ref|NC_018143.2|	1984985	1986677	-	RVBD_1754c	2253	2876	13	17		YP_006515152.1	Rv1754c	RVBD_1754c			hypothetical protein
gi|561108321|ref|NC_018143.2|	1986860	1987682	-	RVBD_1755c	245	330	0	0		YP_006515153.1	Rv1755c	RVBD_1755c			phospholipase C4 PlcD
gi|561108321|ref|NC_018143.2|	1987751	1988636	-	RVBD_1756c	670	1085	1	3		YP_006515154.1	Rv1756c	RVBD_1756c			transposase
gi|561108321|ref|NC_018143.2|	1988686	1989013	-	RVBD_1757c	224	316	3	0		YP_006515155.1	Rv1757c	RVBD_1757c			transposase
gi|561108321|ref|NC_018143.2|	1989048	1989573	+	RVBD_1758	247	259	6	5		YP_006515156.1	Rv1758	RVBD_1758			cutinase Cut1
gi|561108321|ref|NC_018143.2|	1989839	1992584	-	RVBD_1759c	889	638	2	2		YP_006515157.1	Rv1759c	RVBD_1759c			PE-PGRS family protein Wag22
gi|561108321|ref|NC_018143.2|	1993159	1994668	+	RVBD_1760	1545	1770	2	1		YP_006515158.1	Rv1760	RVBD_1760			diacylglycerol acyltransferase
gi|561108321|ref|NC_018143.2|	1994677	1995061	-	RVBD_1761c	600	772	11	16		YP_006515159.1	Rv1761c	RVBD_1761c			exported protein
gi|561108321|ref|NC_018143.2|	1995060	1995849	-	RVBD_1762c	63	113	0	0		YP_006515160.1	Rv1762c	RVBD_1762c			hypothetical protein
gi|561108321|ref|NC_018143.2|	1996158	1996485	+	RVBD_1763	217	315	1	0		YP_006515162.1	Rv1763	RVBD_1763			transposase
gi|561108321|ref|NC_018143.2|	1996535	1997420	+	RVBD_1764	687	1019	1	6		YP_006515163.1	Rv1764	RVBD_1764			transposase
gi|561108321|ref|NC_018143.2|	1999148	1999364	-	RVBD_1765A	144	147	1	0		YP_006515165.1	Rv1765A	RVBD_1765A			transposase
gi|561108321|ref|NC_018143.2|	1997424	1998522	-	RVBD_1765c	120	159	1	8		YP_006515164.1	Rv1765c	RVBD_1765c			hypothetical protein
gi|561108321|ref|NC_018143.2|	1999743	2000013	+	RVBD_1766	20	34	1	0		YP_006515166.1	Rv1766	RVBD_1766			hypothetical protein
gi|561108321|ref|NC_018143.2|	2000080	2000440	+	RVBD_1767	19	26	0	0		YP_006515167.1	Rv1767	RVBD_1767			alkylhydroperoxidase AhpD family core domain-containing protein
gi|561108321|ref|NC_018143.2|	2000620	2002477	+	RVBD_1768	300	267	0	2		YP_006515168.1	Rv1768	RVBD_1768			PE-PGRS family protein PE_PGRS31
gi|561108321|ref|NC_018143.2|	2002632	2003877	+	RVBD_1769	383	410	11	11		YP_006515169.1	Rv1769	RVBD_1769			hypothetical protein
gi|561108321|ref|NC_018143.2|	2003884	2005171	+	RVBD_1770	271	343	10	8		YP_006515170.1	Rv1770	RVBD_1770			hypothetical protein
gi|561108321|ref|NC_018143.2|	2005167	2006454	+	RVBD_1771	260	324	2	3		YP_006515171.1	Rv1771	RVBD_1771			l-gulono-1
gi|561108321|ref|NC_018143.2|	2006642	2006954	+	RVBD_1772	30	24	0	0		YP_006515172.1	Rv1772	RVBD_1772			hypothetical protein
gi|561108321|ref|NC_018143.2|	2007026	2007773	-	RVBD_1773c	58	47	1	0		YP_006515173.1	Rv1773c	RVBD_1773c			transcriptional regulator
gi|561108321|ref|NC_018143.2|	2007838	2009179	+	RVBD_1774	159	252	5	7		YP_006515174.1	Rv1774	RVBD_1774			oxidoreductase
gi|561108321|ref|NC_018143.2|	2009178	2009997	+	RVBD_1775	132	179	4	4		YP_006515175.1	Rv1775	RVBD_1775			hypothetical protein
gi|561108321|ref|NC_018143.2|	2010001	2010562	-	RVBD_1776c	69	77	3	3		YP_006515176.1	Rv1776c	RVBD_1776c			transcriptional regulator
gi|561108321|ref|NC_018143.2|	2010662	2011967	+	RVBD_1777	259	371	10	9		YP_006515177.1	Rv1777	RVBD_1777			cytochrome P450 144 Cyp144
gi|561108321|ref|NC_018143.2|	2012087	2012537	-	RVBD_1778c	41	85	3	2		YP_006515178.1	Rv1778c	RVBD_1778c			hypothetical protein
gi|561108321|ref|NC_018143.2|	2012692	2014486	-	RVBD_1779c	71	104	2	1		YP_006515179.1	Rv1779c	RVBD_1779c			integral membrane protein
gi|561108321|ref|NC_018143.2|	2014705	2015269	+	RVBD_1780	10822	5412	10	8		YP_006515180.1	Rv1780	RVBD_1780			hypothetical protein
gi|561108321|ref|NC_018143.2|	2015308	2017483	-	RVBD_1781c	872	805	2	7		YP_006515181.1	Rv1781c	RVBD_1781c			4-alpha-glucanotransferase MalQ
gi|561108321|ref|NC_018143.2|	2017746	2019267	+	RVBD_1782	0	0	0	1		YP_006515182.1	Rv1782	RVBD_1782			ESX-5 secretion system protein EccB5
gi|561108321|ref|NC_018143.2|	2019263	2023439	+	RVBD_1783	24	15	0	1		YP_006515183.1	Rv1783	RVBD_1783			ESX-5 secretion system protein EccC5
gi|561108321|ref|NC_018143.2|	2023453	2024635	-	RVBD_1785c	2679	3295	2	5		YP_006515184.1	Rv1785c	RVBD_1785c			cytochrome P450 143 Cyp143
gi|561108321|ref|NC_018143.2|	2024834	2025038	+	RVBD_1786	630	895	6	1		YP_006515185.1	Rv1786	RVBD_1786			oxidoreductase
gi|561108321|ref|NC_018143.2|	2025307	2026405	+	RVBD_1787	1536	1709	21	31		YP_006515186.1	Rv1787	RVBD_1787			PPE family protein PPE25
gi|561108321|ref|NC_018143.2|	2026483	2026783	+	RVBD_1788	265	348	1	2		YP_006515187.1	Rv1788	RVBD_1788			PE family protein PE18
gi|561108321|ref|NC_018143.2|	2026796	2027978	+	RVBD_1789	1157	1156	3	11		YP_006515188.1	Rv1789	RVBD_1789			PPE family protein PPE26
gi|561108321|ref|NC_018143.2|	2028431	2029484	+	RVBD_1790	1705	2022	21	35		YP_006515189.1	Rv1790	RVBD_1790			PPE family protein PPE27
gi|561108321|ref|NC_018143.2|	2029910	2030210	+	RVBD_1791	133	263	28	21		YP_006515190.1	Rv1791	RVBD_1791			PE family protein PE19
gi|561108321|ref|NC_018143.2|	2030353	2030530	+	RVBD_1792	432	778	4	1		YP_006515191.1	Rv1792	RVBD_1792			ESAT-6-like protein EsxK
gi|561108321|ref|NC_018143.2|	2030530	2030650	+	RVBD_1792A	29	36	0	0		YP_006515192.1	Rv1792A	RVBD_1792A			ESAT-6-like protein EsxM
gi|561108321|ref|NC_018143.2|	2030700	2030985	+	RVBD_1793	66	67	0	1		YP_006515193.1	Rv1793	RVBD_1793			ESAT-6 like protein EsxN
gi|561108321|ref|NC_018143.2|	2031072	2031975	+	RVBD_1794	44	67	1	1		YP_006515194.1	Rv1794	RVBD_1794			hypothetical protein
gi|561108321|ref|NC_018143.2|	2032246	2033758	+	RVBD_1795	0	4	0	0		YP_006515195.1	Rv1795	RVBD_1795			ESX-5 secretion system protein EccD5
gi|561108321|ref|NC_018143.2|	2033735	2035493	+	RVBD_1796	0	4	1	0		YP_006515196.1	Rv1796	RVBD_1796			proline rich membrane-anchored mycosin MycP5
gi|561108321|ref|NC_018143.2|	2035489	2036710	+	RVBD_1797	0	3	0	0		YP_006515197.1	Rv1797	RVBD_1797			ESX-5 secretion system protein EccE5
gi|561108321|ref|NC_018143.2|	2036706	2038539	+	RVBD_1798	183	291	3	0		YP_006515198.1	Rv1798	RVBD_1798			ESX-5 secretion system protein EccA5
gi|561108321|ref|NC_018143.2|	2039165	2039357	+	RVBD_1799	3	1	0	0		YP_006515199.1	Rv1799	RVBD_1799			lipoprotein LppT
gi|561108321|ref|NC_018143.2|	2039459	2041427	+	RVBD_1800	2848	3586	4	4		YP_006515200.1	Rv1800	RVBD_1800			PPE family protein PPE28
gi|561108321|ref|NC_018143.2|	2042007	2043279	+	RVBD_1801	1646	1625	12	12		YP_006515201.1	Rv1801	RVBD_1801			PPE family protein PPE29
gi|561108321|ref|NC_018143.2|	2043390	2044782	+	RVBD_1802	1665	1159	6	9		YP_006515202.1	Rv1802	RVBD_1802			PPE family protein PPE30
gi|561108321|ref|NC_018143.2|	2044929	2046849	-	RVBD_1803c	406	320	34	35		YP_006515203.1	Rv1803c	RVBD_1803c			PE-PGRS family protein PE_PGRS32
gi|561108321|ref|NC_018143.2|	2047029	2047356	-	RVBD_1804c	163	208	6	1		YP_006515204.1	Rv1804c	RVBD_1804c			hypothetical protein
gi|561108321|ref|NC_018143.2|	2047693	2048041	-	RVBD_1805c	4	13	0	0		YP_006515205.1	Rv1805c	RVBD_1805c			hypothetical protein
gi|561108321|ref|NC_018143.2|	2048078	2048378	+	RVBD_1806	23	24	0	0		YP_006515206.1	Rv1806	RVBD_1806			PE family protein PE20
gi|561108321|ref|NC_018143.2|	2048392	2049604	+	RVBD_1807	364	388	0	0		YP_006515207.1	Rv1807	RVBD_1807			PPE family protein PPE31
gi|561108321|ref|NC_018143.2|	2049927	2051157	+	RVBD_1808	3346	3497	17	8		YP_006515208.1	Rv1808	RVBD_1808			PPE family protein PPE32
gi|561108321|ref|NC_018143.2|	2051288	2052695	+	RVBD_1809	1084	1206	2	2		YP_006515209.1	Rv1809	RVBD_1809			PPE family protein PPE33
gi|561108321|ref|NC_018143.2|	2052939	2053296	+	RVBD_1810	980	1164	0	1		YP_006515210.1	Rv1810	RVBD_1810			hypothetical protein
gi|561108321|ref|NC_018143.2|	2053449	2054154	+	RVBD_1811	1840	2180	5	4		YP_006515211.1	Rv1811	RVBD_1811			Mg2+ transport P-type ATPase C MgtC
gi|561108321|ref|NC_018143.2|	2054163	2055366	-	RVBD_1812c	583	813	9	6		YP_006515212.1	Rv1812c	RVBD_1812c			NADH dehydrogenase-like protein
gi|561108321|ref|NC_018143.2|	2055687	2056119	-	RVBD_1813c	139	220	7	5		YP_006515213.1	Rv1813c	RVBD_1813c			hypothetical protein
gi|561108321|ref|NC_018143.2|	2056527	2057430	+	RVBD_1814	1341	1755	2	1		YP_006515214.1	Rv1814	RVBD_1814			C-5 sterol desaturase Erg3
gi|561108321|ref|NC_018143.2|	2057534	2058200	+	RVBD_1815	202	299	0	0		YP_006515215.1	Rv1815	RVBD_1815			hypothetical protein
gi|561108321|ref|NC_018143.2|	2058262	2058967	+	RVBD_1816	218	246	5	3		YP_006515216.1	Rv1816	RVBD_1816			transcriptional regulator
gi|561108321|ref|NC_018143.2|	2059601	2061065	+	RVBD_1817	3848	3087	5	6		YP_006515217.1	Rv1817	RVBD_1817			flavoprotein
gi|561108321|ref|NC_018143.2|	2061184	2062681	-	RVBD_1818c	307	152	6	2		YP_006515218.1	Rv1818c	RVBD_1818c			PE-PGRS family protein PE_PGRS33
gi|561108321|ref|NC_018143.2|	2062815	2064735	-	RVBD_1819c	1077	986	3	3		YP_006515219.1	Rv1819c	RVBD_1819c			drug-transport transmembrane ABC transporter ATP-binding protein BacA
gi|561108321|ref|NC_018143.2|	2064805	2066449	+	RVBD_1820	1814	2137	9	10		YP_006515220.1	Rv1820	RVBD_1820			acetolactate synthase IlvG
gi|561108321|ref|NC_018143.2|	2066463	2068890	+	RVBD_1821	471	978	1	0		YP_006515221.1	Rv1821	RVBD_1821			preprotein translocase ATPase subunit SecA2
gi|561108321|ref|NC_018143.2|	2069086	2069716	+	RVBD_1822	3	0	1	0		YP_006515222.1	Rv1822	RVBD_1822			CDP-diacylglycerol-glycerol-3-phosphate 3-phosphatidyltransferase PgsA2
gi|561108321|ref|NC_018143.2|	2069708	2070632	+	RVBD_1823	6	16	0	0		YP_006515223.1	Rv1823	RVBD_1823			hypothetical protein
gi|561108321|ref|NC_018143.2|	2070660	2071026	+	RVBD_1824	2	4	1	0		YP_006515224.1	Rv1824	RVBD_1824			hypothetical protein
gi|561108321|ref|NC_018143.2|	2071042	2071921	+	RVBD_1825	72	102	0	0		YP_006515225.1	Rv1825	RVBD_1825			hypothetical protein
gi|561108321|ref|NC_018143.2|	2071958	2072363	+	RVBD_1826	28	29	0	0		YP_006515226.1	Rv1826	RVBD_1826			glycine cleavage system H protein GcvH
gi|561108321|ref|NC_018143.2|	2072602	2073091	+	RVBD_1827	0	0	0	1		YP_006515227.1	Rv1827	RVBD_1827			FHA domain-containing protein GarA
gi|561108321|ref|NC_018143.2|	2073087	2073831	+	RVBD_1828	597	629	0	0		YP_006515228.1	Rv1828	RVBD_1828			hypothetical protein
gi|561108321|ref|NC_018143.2|	2073949	2074444	+	RVBD_1829	163	143	0	0		YP_006515229.1	Rv1829	RVBD_1829			hypothetical protein
gi|561108321|ref|NC_018143.2|	2074847	2075525	+	RVBD_1830	9	16	0	0		YP_006515230.1	Rv1830	RVBD_1830			hypothetical protein
gi|561108321|ref|NC_018143.2|	2075577	2075835	+	RVBD_1831	242	316	13	6		YP_006515231.1	Rv1831	RVBD_1831			hypothetical protein
gi|561108321|ref|NC_018143.2|	2075883	2078709	+	RVBD_1832	44	50	1	0		YP_006515232.1	Rv1832	RVBD_1832			glycine dehydrogenase GcvB
gi|561108321|ref|NC_018143.2|	2078935	2079796	-	RVBD_1833c	148	213	0	0		YP_006515233.1	Rv1833c	RVBD_1833c			haloalkane dehalogenase 2
gi|561108321|ref|NC_018143.2|	2079836	2080703	+	RVBD_1834	161	172	3	0		YP_006515234.1	Rv1834	RVBD_1834			hydrolase
gi|561108321|ref|NC_018143.2|	2080707	2082594	-	RVBD_1835c	3320	4278	22	19		YP_006515235.1	Rv1835c	RVBD_1835c			hydrolase
gi|561108321|ref|NC_018143.2|	2082609	2084643	-	RVBD_1836c	2	24	0	0		YP_006515236.1	Rv1836c	RVBD_1836c			hypothetical protein
gi|561108321|ref|NC_018143.2|	2084762	2086988	-	RVBD_1837c	0	0	0	0		YP_006515237.1	Rv1837c	RVBD_1837c			malate synthase G GlcB
gi|561108321|ref|NC_018143.2|	2087263	2087659	-	RVBD_1838c	3110	2708	10	17		YP_006515238.1	Rv1838c	RVBD_1838c			toxin VapC13
gi|561108321|ref|NC_018143.2|	2087655	2087919	-	RVBD_1839c	227	170	0	0		YP_006515239.1	Rv1839c	RVBD_1839c			antitoxin VapB13
gi|561108321|ref|NC_018143.2|	2087977	2089525	-	RVBD_1840c	216	174	2	2		YP_006515240.1	Rv1840c	RVBD_1840c			PE-PGRS family protein PE_PGRS34
gi|561108321|ref|NC_018143.2|	2089687	2090725	-	RVBD_1841c	396	361	5	7		YP_006515241.1	Rv1841c	RVBD_1841c			hypothetical protein
gi|561108321|ref|NC_018143.2|	2090724	2092092	-	RVBD_1842c	1339	1206	1	1		YP_006515242.1	Rv1842c	RVBD_1842c			hypothetical protein
gi|561108321|ref|NC_018143.2|	2092265	2093705	-	RVBD_1843c	5805	5362	26	18		YP_006515243.1	Rv1843c	RVBD_1843c			inosine-5'-monophosphate dehydrogenase GuaB1
gi|561108321|ref|NC_018143.2|	2093737	2095195	-	RVBD_1844c	2056	2040	2	2		YP_006515244.1	Rv1844c	RVBD_1844c			6-phosphogluconate dehydrogenase Gnd1
gi|561108321|ref|NC_018143.2|	2095224	2096175	-	RVBD_1845c	2	23	0	2		YP_006515245.1	Rv1845c	RVBD_1845c			ensor-transducer protein BlaR
gi|561108321|ref|NC_018143.2|	2096189	2096606	-	RVBD_1846c	70	52	2	0		YP_006515246.1	Rv1846c	RVBD_1846c			transcriptional regulator BlaI
gi|561108321|ref|NC_018143.2|	2096883	2097306	+	RVBD_1847	1664	1516	0	1		YP_006515247.1	Rv1847	RVBD_1847			hypothetical protein
gi|561108321|ref|NC_018143.2|	2097354	2097657	+	RVBD_1848	36	32	0	0		YP_006515248.1	Rv1848	RVBD_1848			urease gamma subunit UreA
gi|561108321|ref|NC_018143.2|	2097653	2097968	+	RVBD_1849	9	2	0	0		YP_006515249.1	Rv1849	RVBD_1849			urease beta subunit UreB
gi|561108321|ref|NC_018143.2|	2097967	2099701	+	RVBD_1850	1652	1577	6	9		YP_006515250.1	Rv1850	RVBD_1850			urease alpha subunit UreC
gi|561108321|ref|NC_018143.2|	2099700	2100336	+	RVBD_1851	43	55	2	5		YP_006515251.1	Rv1851	RVBD_1851			urease accessory protein UreF
gi|561108321|ref|NC_018143.2|	2100346	2101021	+	RVBD_1852	41	31	0	0		YP_006515252.1	Rv1852	RVBD_1852			urease accessory protein UreG
gi|561108321|ref|NC_018143.2|	2101028	2101655	+	RVBD_1853	92	65	0	0		YP_006515253.1	Rv1853	RVBD_1853			urease accessory protein UreD
gi|561108321|ref|NC_018143.2|	2101657	2103049	-	RVBD_1854c	10	3	0	0		YP_006515254.1	Rv1854c	RVBD_1854c			NADH dehydrogenase Ndh
gi|561108321|ref|NC_018143.2|	2103190	2104114	-	RVBD_1855c	770	732	2	1		YP_006515255.1	Rv1855c	RVBD_1855c			oxidoreductase
gi|561108321|ref|NC_018143.2|	2104152	2104830	-	RVBD_1856c	564	549	2	1		YP_006515256.1	Rv1856c	RVBD_1856c			oxidoreductase
gi|561108321|ref|NC_018143.2|	2104991	2105777	+	RVBD_1857	1656	1782	5	3		YP_006515257.1	Rv1857	RVBD_1857			molybdenum-transport ABC transporter molybdate-binding lipoprotein ModA
gi|561108321|ref|NC_018143.2|	2105779	2106574	+	RVBD_1858	2144	2464	3	3		YP_006515258.1	Rv1858	RVBD_1858			molybdenum-transport ABC transporter integral membrane protein ModB
gi|561108321|ref|NC_018143.2|	2106580	2107690	+	RVBD_1859	472	405	0	0		YP_006515259.1	Rv1859	RVBD_1859			molybdenum-transport ABC transporter ATP-binding protein ModC
gi|561108321|ref|NC_018143.2|	2107742	2108720	+	RVBD_1860	1763	1186	2	3		YP_006515260.1	Rv1860	RVBD_1860			alanine and proline rich secreted protein Apa
gi|561108321|ref|NC_018143.2|	2109171	2109477	+	RVBD_1861	183	152	1	4		YP_006515261.1	Rv1861	RVBD_1861			transmembrane protein
gi|561108321|ref|NC_018143.2|	2109550	2110591	+	RVBD_1862	805	940	4	4		YP_006515262.1	Rv1862	RVBD_1862			alcohol dehydrogenase AdhA
gi|561108321|ref|NC_018143.2|	2110597	2111368	-	RVBD_1863c	200	456	1	3		YP_006515263.1	Rv1863c	RVBD_1863c			integral membrane protein
gi|561108321|ref|NC_018143.2|	2111360	2112116	-	RVBD_1864c	238	287	8	5		YP_006515264.1	Rv1864c	RVBD_1864c			hypothetical protein
gi|561108321|ref|NC_018143.2|	2112112	2112973	-	RVBD_1865c	72	111	0	1		YP_006515265.1	Rv1865c	RVBD_1865c			oxidoreductase
gi|561108321|ref|NC_018143.2|	2113146	2115483	+	RVBD_1866	352	377	3	2		YP_006515266.1	Rv1866	RVBD_1866			mycolyltransferase antigen 85B
gi|561108321|ref|NC_018143.2|	2115770	2117255	+	RVBD_1867	298	378	1	1		YP_006515267.1	Rv1867	RVBD_1867			acetyl-CoA acetyltransferase
gi|561108321|ref|NC_018143.2|	2117353	2119453	+	RVBD_1868	436	631	1	4		YP_006515268.1	Rv1868	RVBD_1868			hypothetical protein
gi|561108321|ref|NC_018143.2|	2119466	2120702	-	RVBD_1869c	361	540	7	5		YP_006515269.1	Rv1869c	RVBD_1869c			oxidoreductase
gi|561108321|ref|NC_018143.2|	2120801	2121437	-	RVBD_1870c	1202	2058	0	0		YP_006515270.1	Rv1870c	RVBD_1870c			hypothetical protein
gi|561108321|ref|NC_018143.2|	2121501	2121891	-	RVBD_1871c	164	257	7	4		YP_006515271.1	Rv1871c	RVBD_1871c			deazaflavin-dependent nitroreductase
gi|561108321|ref|NC_018143.2|	2121913	2123158	-	RVBD_1872c	255	404	6	1		YP_006515272.1	Rv1872c	RVBD_1872c			l-lactate dehydrogenase LldD2
gi|561108321|ref|NC_018143.2|	2123180	2123618	+	RVBD_1873	388	472	2	10		YP_006515273.1	Rv1873	RVBD_1873			hypothetical protein
gi|561108321|ref|NC_018143.2|	2123690	2124377	+	RVBD_1874	445	674	4	1		YP_006515274.1	Rv1874	RVBD_1874			hypothetical protein
gi|561108321|ref|NC_018143.2|	2124387	2124831	+	RVBD_1875	89	175	0	0		YP_006515275.1	Rv1875	RVBD_1875			hypothetical protein
gi|561108321|ref|NC_018143.2|	2125346	2125826	+	RVBD_1876	933	1907	13	8		YP_006515276.1	Rv1876	RVBD_1876			bacterioferritin BfrA
gi|561108321|ref|NC_018143.2|	2125910	2127974	+	RVBD_1877	1217	2326	16	15		YP_006515277.1	Rv1877	RVBD_1877			drug:H+ antiporter-2 (14 Spanner) (DHA2) family drug resistance MFS transporter
gi|561108321|ref|NC_018143.2|	2128028	2129381	+	RVBD_1878	977	1678	6	9		YP_006515278.1	Rv1878	RVBD_1878			glutamine synthetase GlnA3
gi|561108321|ref|NC_018143.2|	2129383	2130520	+	RVBD_1879	1375	2384	2	3		YP_006515279.1	Rv1879	RVBD_1879			hypothetical protein
gi|561108321|ref|NC_018143.2|	2130547	2131864	-	RVBD_1880c	89	267	3	4		YP_006515280.1	Rv1880c	RVBD_1880c			cytochrome P450 140 Cyp140
gi|561108321|ref|NC_018143.2|	2131913	2132336	-	RVBD_1881c	559	968	14	10		YP_006515281.1	Rv1881c	RVBD_1881c			lipoprotein LppE
gi|561108321|ref|NC_018143.2|	2132376	2133210	-	RVBD_1882c	1704	3662	6	6		YP_006515282.1	Rv1882c	RVBD_1882c			short-chain dehydrogenase/reductase
gi|561108321|ref|NC_018143.2|	2133237	2133699	-	RVBD_1883c	76	128	0	0		YP_006515283.1	Rv1883c	RVBD_1883c			hypothetical protein
gi|561108321|ref|NC_018143.2|	2133737	2134268	-	RVBD_1884c	57	210	2	2		YP_006515284.1	Rv1884c	RVBD_1884c			resuscitation-promoting factor RpfC
gi|561108321|ref|NC_018143.2|	2134279	2134879	-	RVBD_1885c	223	502	0	3		YP_006515285.1	Rv1885c	RVBD_1885c			chorismate mutase
gi|561108321|ref|NC_018143.2|	2134896	2135874	-	RVBD_1886c	328	787	0	2		YP_006515286.1	Rv1886c	RVBD_1886c			secreted antigen 85-B FbpB
gi|561108321|ref|NC_018143.2|	2136264	2137407	+	RVBD_1887	294	548	7	2		YP_006515288.1	Rv1887	RVBD_1887			hypothetical protein
gi|561108321|ref|NC_018143.2|	2138450	2138624	-	RVBD_1888A	0	0	0	0		YP_006515290.1	Rv1888A	RVBD_1888A			hypothetical protein
gi|561108321|ref|NC_018143.2|	2137525	2138086	-	RVBD_1888c	1611	2281	5	1		YP_006515289.1	Rv1888c	RVBD_1888c			transmembrane protein
gi|561108321|ref|NC_018143.2|	2138667	2139024	-	RVBD_1889c	34	85	11	5		YP_006515291.1	Rv1889c	RVBD_1889c			hypothetical protein
gi|561108321|ref|NC_018143.2|	2139082	2139694	-	RVBD_1890c	80	205	0	3		YP_006515292.1	Rv1890c	RVBD_1890c			hypothetical protein
gi|561108321|ref|NC_018143.2|	2139747	2140155	+	RVBD_1891	71	131	1	1		YP_006515293.1	Rv1891	RVBD_1891			hypothetical protein
gi|561108321|ref|NC_018143.2|	2140171	2140483	+	RVBD_1892	149	278	10	10		YP_006515294.1	Rv1892	RVBD_1892			membrane protein
gi|561108321|ref|NC_018143.2|	2140492	2140711	+	RVBD_1893	22	66	1	0		YP_006515295.1	Rv1893	RVBD_1893			hypothetical protein
gi|561108321|ref|NC_018143.2|	2140745	2141876	-	RVBD_1894c	274	438	2	3		YP_006515296.1	Rv1894c	RVBD_1894c			hypothetical protein
gi|561108321|ref|NC_018143.2|	2142527	2143682	+	RVBD_1895	2150	2717	1	3		YP_006515298.1	Rv1895	RVBD_1895			dehydrogenase
gi|561108321|ref|NC_018143.2|	2143541	2144453	-	RVBD_1896c	2436	3196	0	4		YP_006515299.1	Rv1896c	RVBD_1896c			hypothetical protein
gi|561108321|ref|NC_018143.2|	2144457	2144889	-	RVBD_1897c	17	30	0	0		YP_006515300.1	Rv1897c	RVBD_1897c			d-tyrosyl-tRNA(Tyr) deacylase
gi|561108321|ref|NC_018143.2|	2144946	2145255	+	RVBD_1898	94	59	0	1		YP_006515301.1	Rv1898	RVBD_1898			hypothetical protein
gi|561108321|ref|NC_018143.2|	2145220	2146252	-	RVBD_1899c	2441	2361	4	8		YP_006515302.1	Rv1899c	RVBD_1899c			lipoprotein LppD
gi|561108321|ref|NC_018143.2|	2146251	2147640	-	RVBD_1900c	442	468	13	12		YP_006515303.1	Rv1900c	RVBD_1900c			lignin peroxidase LipJ
gi|561108321|ref|NC_018143.2|	2147668	2148961	+	RVBD_1901	856	1738	38	44		YP_006515304.1	Rv1901	RVBD_1901			cinA-like protein CinA
gi|561108321|ref|NC_018143.2|	2149012	2150281	-	RVBD_1902c	199	329	0	0		YP_006515305.1	Rv1902c	RVBD_1902c			sialic acid-transport integral membrane protein NanT
gi|561108321|ref|NC_018143.2|	2150370	2150775	+	RVBD_1903	677	1278	9	5		YP_006515306.1	Rv1903	RVBD_1903			membrane protein
gi|561108321|ref|NC_018143.2|	2150960	2151392	+	RVBD_1904	124	205	0	1		YP_006515307.1	Rv1904	RVBD_1904			anti-anti-sigma factor
gi|561108321|ref|NC_018143.2|	2151439	2152402	-	RVBD_1905c	814	1168	7	4		YP_006515308.1	Rv1905c	RVBD_1905c			d-amino acid oxidase Aao
gi|561108321|ref|NC_018143.2|	2152431	2152902	-	RVBD_1906c	335	662	1	3		YP_006515309.1	Rv1906c	RVBD_1906c			hypothetical protein
gi|561108321|ref|NC_018143.2|	2153241	2153889	-	RVBD_1907c	69	167	0	0		YP_006515310.1	Rv1907c	RVBD_1907c			hypothetical protein
gi|561108321|ref|NC_018143.2|	2153895	2156118	-	RVBD_1908c	830	1438	2	0		YP_006515311.1	Rv1908c	RVBD_1908c			catalase-peroxidase-peroxynitritase T KatG
gi|561108321|ref|NC_018143.2|	2156155	2156599	-	RVBD_1909c	1564	2326	1	0		YP_006515312.2	Rv1909c	RVBD_1909c			ferric uptake regulation protein FurA
gi|561108321|ref|NC_018143.2|	2156712	2157306	-	RVBD_1910c	83	71	1	1		YP_006515313.1	Rv1910c	RVBD_1910c			exported protein
gi|561108321|ref|NC_018143.2|	2157388	2157994	-	RVBD_1911c	124	142	1	1		YP_006515314.1	Rv1911c	RVBD_1911c			lipoprotein LppC
gi|561108321|ref|NC_018143.2|	2158093	2159098	-	RVBD_1912c	171	257	0	0		YP_006515315.1	Rv1912c	RVBD_1912c			oxidoreductase
gi|561108321|ref|NC_018143.2|	2159197	2159950	+	RVBD_1913	74	95	0	0		YP_006515316.1	Rv1913	RVBD_1913			hypothetical protein
gi|561108321|ref|NC_018143.2|	2159927	2160335	-	RVBD_1914c	55	139	2	1		YP_006515317.1	Rv1914c	RVBD_1914c			hypothetical protein
gi|561108321|ref|NC_018143.2|	2160469	2161573	+	RVBD_1915	230	538	2	5		YP_006515318.1	Rv1915	RVBD_1915			isocitrate lyase AceAa
gi|561108321|ref|NC_018143.2|	2161572	2162769	+	RVBD_1916	95	170	0	1		YP_006515319.1	Rv1916	RVBD_1916			isocitrate lyase AceAb
gi|561108321|ref|NC_018143.2|	2162938	2167318	-	RVBD_1917c	3065	5705	13	16		YP_006515320.1	Rv1917c	RVBD_1917c			PPE family protein PPE34
gi|561108321|ref|NC_018143.2|	2167655	2170619	-	RVBD_1918c	855	1350	10	10		YP_006515321.1	Rv1918c	RVBD_1918c			PPE family protein PPE35
gi|561108321|ref|NC_018143.2|	2171067	2171532	-	RVBD_1919c	127	174	0	0		YP_006515322.1	Rv1919c	RVBD_1919c			hypothetical protein
gi|561108321|ref|NC_018143.2|	2171629	2172493	+	RVBD_1920	113	263	2	1		YP_006515323.1	Rv1920	RVBD_1920			membrane protein
gi|561108321|ref|NC_018143.2|	2172530	2173802	-	RVBD_1921c	70	157	1	1		YP_006515324.1	Rv1921c	RVBD_1921c			lipoprotein LppF
gi|561108321|ref|NC_018143.2|	2174073	2175189	+	RVBD_1922	151	290	1	7		YP_006515325.1	Rv1922	RVBD_1922			beta-lactamase
gi|561108321|ref|NC_018143.2|	2175179	2176520	+	RVBD_1923	1137	2137	14	19		YP_006515326.1	Rv1923	RVBD_1923			lipase LipD
gi|561108321|ref|NC_018143.2|	2176556	2176937	-	RVBD_1924c	363	621	8	13		YP_006515327.1	Rv1924c	RVBD_1924c			hypothetical protein
gi|561108321|ref|NC_018143.2|	2177093	2178956	+	RVBD_1925	1198	2633	16	17		YP_006515328.1	Rv1925	RVBD_1925			acyl-CoA ligase FadD31
gi|561108321|ref|NC_018143.2|	2178963	2179443	-	RVBD_1926c	2479	3318	19	19		YP_006515329.1	Rv1926c	RVBD_1926c			immunogenic protein MPT63
gi|561108321|ref|NC_018143.2|	2179679	2180453	+	RVBD_1927	158	219	2	1		YP_006515330.1	Rv1927	RVBD_1927			hypothetical protein
gi|561108321|ref|NC_018143.2|	2180456	2181224	-	RVBD_1928c	1115	1640	0	4		YP_006515331.1	Rv1928c	RVBD_1928c			oxidoreductase
gi|561108321|ref|NC_018143.2|	2181268	2181913	-	RVBD_1929c	34	65	0	0		YP_006515332.1	Rv1929c	RVBD_1929c			hypothetical protein
gi|561108321|ref|NC_018143.2|	2181924	2182449	-	RVBD_1930c	44	35	0	0		YP_006515333.1	Rv1930c	RVBD_1930c			hypothetical protein
gi|561108321|ref|NC_018143.2|	2182466	2183246	-	RVBD_1931c	17	14	1	0		YP_006515334.1	Rv1931c	RVBD_1931c			transcriptional regulator
gi|561108321|ref|NC_018143.2|	2183378	2183876	+	RVBD_1932	79	143	0	1		YP_006515335.1	Rv1932	RVBD_1932			thiol peroxidase Tpx
gi|561108321|ref|NC_018143.2|	2183872	2184964	-	RVBD_1933c	48	66	0	2		YP_006515336.1	Rv1933c	RVBD_1933c			acyl-CoA dehydrogenase FadE18
gi|561108321|ref|NC_018143.2|	2184965	2186195	-	RVBD_1934c	153	126	1	0		YP_006515337.1	Rv1934c	RVBD_1934c			acyl-CoA dehydrogenase FadE17
gi|561108321|ref|NC_018143.2|	2186209	2187166	-	RVBD_1935c	1597	1590	0	0		YP_006515338.1	Rv1935c	RVBD_1935c			enoyl-CoA hydratase EchA13
gi|561108321|ref|NC_018143.2|	2187390	2188500	+	RVBD_1936	278	356	4	2		YP_006515339.1	Rv1936	RVBD_1936			monooxygenase
gi|561108321|ref|NC_018143.2|	2188502	2191022	+	RVBD_1937	473	413	2	3		YP_006515340.1	Rv1937	RVBD_1937			oxidoreductase
gi|561108321|ref|NC_018143.2|	2191033	2192104	+	RVBD_1938	720	744	0	0		YP_006515341.1	Rv1938	RVBD_1938			epoxide hydrolase EphB
gi|561108321|ref|NC_018143.2|	2192100	2192616	+	RVBD_1939	15	7	1	0		YP_006515342.1	Rv1939	RVBD_1939			oxidoreductase
gi|561108321|ref|NC_018143.2|	2192612	2193674	+	RVBD_1940	215	209	4	5		YP_006515343.1	Rv1940	RVBD_1940			riboflavin biosynthesis protein RibA1
gi|561108321|ref|NC_018143.2|	2193670	2194441	+	RVBD_1941	35	73	0	0		YP_006515344.1	Rv1941	RVBD_1941			oxidoreductase
gi|561108321|ref|NC_018143.2|	2194650	2194980	-	RVBD_1942c	8	6	0	0		YP_006515345.1	Rv1942c	RVBD_1942c			toxin MazF5
gi|561108321|ref|NC_018143.2|	2194976	2195354	-	RVBD_1943c	88	169	0	0		YP_006515346.1	Rv1943c	RVBD_1943c			antitoxin MazE5
gi|561108321|ref|NC_018143.2|	2195350	2195941	-	RVBD_1944c	94	182	1	1		YP_006515347.1	Rv1944c	RVBD_1944c			hypothetical protein
gi|561108321|ref|NC_018143.2|	2195995	2197360	+	RVBD_1945	119	192	1	3		YP_006515348.1	Rv1945	RVBD_1945			hypothetical protein
gi|561108321|ref|NC_018143.2|	2197514	2197967	-	RVBD_1946c	19	17	0	0		YP_006515349.1	Rv1946c	RVBD_1946c			lipoprotein LppG
gi|561108321|ref|NC_018143.2|	2198030	2198432	+	RVBD_1947	58	107	0	0		YP_006515350.1	Rv1947	RVBD_1947			hypothetical protein
gi|561108321|ref|NC_018143.2|	2198720	2199071	-	RVBD_1948c	1219	1910	4	3		YP_006515351.1	Rv1948c	RVBD_1948c			hypothetical protein
gi|561108321|ref|NC_018143.2|	2199081	2200038	-	RVBD_1949c	157	199	3	3		YP_006515352.1	Rv1949c	RVBD_1949c			hypothetical protein
gi|561108321|ref|NC_018143.2|	2200004	2200196	-	RVBD_1950c	1204	1841	4	5		YP_006515353.1	Rv1950c	RVBD_1950c			hypothetical protein
gi|561108321|ref|NC_018143.2|	2200196	2200493	-	RVBD_1951c	162	262	0	0		YP_006515354.1	Rv1951c	RVBD_1951c			hypothetical protein
gi|561108321|ref|NC_018143.2|	2200732	2200948	+	RVBD_1952	15	11	0	0		YP_006515355.1	Rv1952	RVBD_1952			antitoxin VapB14
gi|561108321|ref|NC_018143.2|	2200944	2201256	+	RVBD_1953	110	144	0	4		YP_006515356.1	Rv1953	RVBD_1953			toxin VapC14
gi|561108321|ref|NC_018143.2|	2201283	2201586	+	RVBD_1954A	24	42	0	0		YP_008855185.1	Rv1954A	RVBD_1954A			hypothetical protein
gi|561108321|ref|NC_018143.2|	2201229	2201751	-	RVBD_1954c	66	99	0	7		YP_006515357.1	Rv1954c	RVBD_1954c			hypothetical protein
[truncated: 2,093 more rows]
[truncated: 1 more columns]

## Sheet: GFF DATA TOTAL
NC_018143.2	RefSeq	region	1	4411709	.	+	.	ID=id0	Name=ANONYMOUS	Dbxref=taxon:83332	Is_circular=true	gbkey=Src	genome=chromosome	mol_type=genomic DNA	strain=H37Rv
NC_018143.2	RefSeq	gene	1	1524	.	+	.	ID=gene0	Name=RVBD_0001	Dbxref=GeneID:13317401	gbkey=Gene	locus_tag=RVBD_0001
NC_018143.2	RefSeq	CDS	1	1524	.	+	0	ID=cds0	Name=YP_006513313.1	Parent=gene0	Dbxref=TubercuList:Rv0001,Genbank:YP_006513313.1,GeneID:13317401	gbkey=CDS	product=chromosomal replication initiator protein DnaA	protein_id=YP_006513313.1	transl_table=11
NC_018143.2	RefSeq	gene	2052	3260	.	+	.	ID=gene1	Name=RVBD_0002	Dbxref=GeneID:13315975	gbkey=Gene	locus_tag=RVBD_0002
NC_018143.2	RefSeq	CDS	2052	3260	.	+	0	ID=cds1	Name=YP_006513314.1	Parent=gene1	Dbxref=TubercuList:Rv0002,Genbank:YP_006513314.1,GeneID:13315975	gbkey=CDS	product=DNA polymerase III DnaN	protein_id=YP_006513314.1	transl_table=11
NC_018143.2	RefSeq	gene	3280	4437	.	+	.	ID=gene2	Name=RVBD_0003	Dbxref=GeneID:13315976	gbkey=Gene	locus_tag=RVBD_0003
NC_018143.2	RefSeq	CDS	3280	4437	.	+	0	ID=cds2	Name=YP_006513315.1	Parent=gene2	Dbxref=TubercuList:Rv0003,Genbank:YP_006513315.1,GeneID:13315976	gbkey=CDS	product=DNA replication and repair protein RecF	protein_id=YP_006513315.1	transl_table=11
NC_018143.2	RefSeq	gene	4434	4997	.	+	.	ID=gene3	Name=RVBD_0004	Dbxref=GeneID:13315977	gbkey=Gene	locus_tag=RVBD_0004
NC_018143.2	RefSeq	CDS	4434	4997	.	+	0	ID=cds3	Name=YP_006513316.1	Parent=gene3	Dbxref=TubercuList:Rv0004,Genbank:YP_006513316.1,GeneID:13315977	gbkey=CDS	product=hypothetical protein	protein_id=YP_006513316.1	transl_table=11
NC_018143.2	RefSeq	gene	5240	7267	.	+	.	ID=gene4	Name=RVBD_0005	Dbxref=GeneID:13315978	gbkey=Gene	locus_tag=RVBD_0005
NC_018143.2	RefSeq	CDS	5240	7267	.	+	0	ID=cds4	Name=YP_006513317.2	Parent=gene4	Dbxref=TubercuList:Rv0005,Genbank:YP_006513317.2,GeneID:13315978	gbkey=CDS	product=DNA gyrase subunit B GyrB	protein_id=YP_006513317.2	transl_table=11
NC_018143.2	RefSeq	gene	7302	9818	.	+	.	ID=gene5	Name=RVBD_0006	Dbxref=GeneID:13315979	gbkey=Gene	locus_tag=RVBD_0006
NC_018143.2	RefSeq	CDS	7302	9818	.	+	0	ID=cds5	Name=YP_006513318.1	Parent=gene5	Dbxref=TubercuList:Rv0006,Genbank:YP_006513318.1,GeneID:13315979	gbkey=CDS	product=DNA gyrase subunit A GyrA	protein_id=YP_006513318.1	transl_table=11
NC_018143.2	RefSeq	gene	9914	10828	.	+	.	ID=gene6	Name=RVBD_0007	Dbxref=GeneID:13315980	gbkey=Gene	locus_tag=RVBD_0007
NC_018143.2	RefSeq	CDS	9914	10828	.	+	0	ID=cds6	Name=YP_006513319.1	Parent=gene6	Dbxref=TubercuList:Rv0007,Genbank:YP_006513319.1,GeneID:13315980	gbkey=CDS	product=membrane protein	protein_id=YP_006513319.1	transl_table=11
NC_018143.2	RefSeq	gene	10887	10963	.	+	.	ID=gene7	Name=RVBD_6000	Dbxref=GeneID:13315981	gbkey=Gene	locus_tag=RVBD_6000
NC_018143.2	RefSeq	tRNA	10887	10963	.	+	.	ID=rna0	Parent=gene7	Dbxref=GeneID:13315981	gbkey=tRNA	product=tRNA-Ile
NC_018143.2	RefSeq	exon	10887	10963	.	+	.	ID=id1	Parent=rna0	Dbxref=GeneID:13315981	gbkey=tRNA	product=tRNA-Ile
NC_018143.2	RefSeq	gene	11112	11187	.	+	.	ID=gene8	Name=RVBD_6001	Dbxref=GeneID:13315982	gbkey=Gene	locus_tag=RVBD_6001
NC_018143.2	RefSeq	tRNA	11112	11187	.	+	.	ID=rna1	Parent=gene8	Dbxref=GeneID:13315982	gbkey=tRNA	product=tRNA-Ala
NC_018143.2	RefSeq	exon	11112	11187	.	+	.	ID=id2	Parent=rna1	Dbxref=GeneID:13315982	gbkey=tRNA	product=tRNA-Ala
NC_018143.2	RefSeq	gene	11874	12311	.	-	.	ID=gene9	Name=RVBD_0008c	Dbxref=GeneID:13315985	gbkey=Gene	locus_tag=RVBD_0008c
NC_018143.2	RefSeq	CDS	11874	12311	.	-	0	ID=cds7	Name=YP_006513322.1	Parent=gene9	Dbxref=TubercuList:Rv0008c,Genbank:YP_006513322.1,GeneID:13315985	gbkey=CDS	product=membrane protein	protein_id=YP_006513322.1	transl_table=11
NC_018143.2	RefSeq	gene	12468	13016	.	+	.	ID=gene10	Name=RVBD_0009	Dbxref=GeneID:13315986	gbkey=Gene	locus_tag=RVBD_0009
NC_018143.2	RefSeq	CDS	12468	13016	.	+	0	ID=cds8	Name=YP_006513323.1	Parent=gene10	Dbxref=TubercuList:Rv0009,Genbank:YP_006513323.1,GeneID:13315986	gbkey=CDS	product=iron-regulated peptidyl-prolyl cis-trans isomerase A PpiA	protein_id=YP_006513323.1	transl_table=11
NC_018143.2	RefSeq	gene	13133	13558	.	-	.	ID=gene11	Name=RVBD_0010c	Dbxref=GeneID:13315987	gbkey=Gene	locus_tag=RVBD_0010c
NC_018143.2	RefSeq	CDS	13133	13558	.	-	0	ID=cds9	Name=YP_006513324.1	Parent=gene11	Dbxref=TubercuList:Rv0010c,Genbank:YP_006513324.1,GeneID:13315987	gbkey=CDS	product=membrane protein	protein_id=YP_006513324.1	transl_table=11
NC_018143.2	RefSeq	gene	13714	13995	.	-	.	ID=gene12	Name=RVBD_0011c	Dbxref=GeneID:13315988	gbkey=Gene	locus_tag=RVBD_0011c
NC_018143.2	RefSeq	CDS	13714	13995	.	-	0	ID=cds10	Name=YP_006513325.1	Parent=gene12	Dbxref=TubercuList:Rv0011c,Genbank:YP_006513325.1,GeneID:13315988	gbkey=CDS	product=cell division protein%2C PG complex	protein_id=YP_006513325.1	transl_table=11
NC_018143.2	RefSeq	gene	14089	14877	.	+	.	ID=gene13	Name=RVBD_0012	Dbxref=GeneID:13315989	gbkey=Gene	locus_tag=RVBD_0012
NC_018143.2	RefSeq	CDS	14089	14877	.	+	0	ID=cds11	Name=YP_006513326.1	Parent=gene13	Dbxref=TubercuList:Rv0012,Genbank:YP_006513326.1,GeneID:13315989	gbkey=CDS	product=membrane protein	protein_id=YP_006513326.1	transl_table=11
NC_018143.2	RefSeq	gene	14914	15612	.	+	.	ID=gene14	Name=RVBD_0013	Dbxref=GeneID:13315990	gbkey=Gene	locus_tag=RVBD_0013
NC_018143.2	RefSeq	CDS	14914	15612	.	+	0	ID=cds12	Name=YP_006513327.1	Parent=gene14	Dbxref=TubercuList:Rv0013,Genbank:YP_006513327.1,GeneID:13315990	gbkey=CDS	product=anthranilate synthase component II TrpG	protein_id=YP_006513327.1	transl_table=11
NC_018143.2	RefSeq	gene	15590	17470	.	-	.	ID=gene15	Name=RVBD_0014c	Dbxref=GeneID:13315991	gbkey=Gene	locus_tag=RVBD_0014c
NC_018143.2	RefSeq	CDS	15590	17470	.	-	0	ID=cds13	Name=YP_006513328.1	Parent=gene15	Dbxref=TubercuList:Rv0014c,Genbank:YP_006513328.1,GeneID:13315991	gbkey=CDS	product=transmembrane serine%2Fthreonine-protein kinase B PknB	protein_id=YP_006513328.1	transl_table=11
NC_018143.2	RefSeq	gene	17467	18762	.	-	.	ID=gene16	Name=RVBD_0015c	Dbxref=GeneID:13315992	gbkey=Gene	locus_tag=RVBD_0015c
NC_018143.2	RefSeq	CDS	17467	18762	.	-	0	ID=cds14	Name=YP_006513329.1	Parent=gene16	Dbxref=TubercuList:Rv0015c,Genbank:YP_006513329.1,GeneID:13315992	gbkey=CDS	product=transmembrane serine%2Fthreonine-protein kinase A PknA	protein_id=YP_006513329.1	transl_table=11
NC_018143.2	RefSeq	gene	18759	20234	.	-	.	ID=gene17	Name=RVBD_0016c	Dbxref=GeneID:13315993	gbkey=Gene	locus_tag=RVBD_0016c
NC_018143.2	RefSeq	CDS	18759	20234	.	-	0	ID=cds15	Name=YP_006513330.1	Parent=gene17	Dbxref=TubercuList:Rv0016c,Genbank:YP_006513330.1,GeneID:13315993	gbkey=CDS	product=penicillin-binding protein PbpA	protein_id=YP_006513330.1	transl_table=11
NC_018143.2	RefSeq	gene	20231	21640	.	-	.	ID=gene18	Name=RVBD_0017c	Dbxref=GeneID:13315994	gbkey=Gene	locus_tag=RVBD_0017c
NC_018143.2	RefSeq	CDS	20231	21640	.	-	0	ID=cds16	Name=YP_006513331.1	Parent=gene18	Dbxref=TubercuList:Rv0017c,Genbank:YP_006513331.1,GeneID:13315994	gbkey=CDS	product=cell division protein RodA	protein_id=YP_006513331.1	transl_table=11
NC_018143.2	RefSeq	gene	21637	23181	.	-	.	ID=gene19	Name=RVBD_0018c	Dbxref=GeneID:13315995	gbkey=Gene	locus_tag=RVBD_0018c
NC_018143.2	RefSeq	CDS	21637	23181	.	-	0	ID=cds17	Name=YP_006513332.1	Parent=gene19	Dbxref=TubercuList:Rv0018c,Genbank:YP_006513332.1,GeneID:13315995	gbkey=CDS	product=phosphoserine%2Fthreonine phosphatase PstP	protein_id=YP_006513332.1	transl_table=11
NC_018143.2	RefSeq	gene	23270	23737	.	-	.	ID=gene20	Name=RVBD_0019c	Dbxref=GeneID:13315996	gbkey=Gene	locus_tag=RVBD_0019c
NC_018143.2	RefSeq	CDS	23270	23737	.	-	0	ID=cds18	Name=YP_006513333.1	Parent=gene20	Dbxref=TubercuList:Rv0019c,Genbank:YP_006513333.1,GeneID:13315996	gbkey=CDS	product=FHA domain-containing protein FhaB	protein_id=YP_006513333.1	transl_table=11
NC_018143.2	RefSeq	gene	23861	25444	.	-	.	ID=gene21	Name=RVBD_0020c	Dbxref=GeneID:13315997	gbkey=Gene	locus_tag=RVBD_0020c
NC_018143.2	RefSeq	CDS	23861	25444	.	-	0	ID=cds19	Name=YP_006513334.1	Parent=gene21	Dbxref=TubercuList:Rv0020c,Genbank:YP_006513334.1,GeneID:13315997	gbkey=CDS	product=FHA domain-containing protein FhaA	protein_id=YP_006513334.1	transl_table=11
NC_018143.2	RefSeq	gene	25644	25729	.	+	.	ID=gene22	Name=RVBD_6002	Dbxref=GeneID:13315998	gbkey=Gene	locus_tag=RVBD_6002
NC_018143.2	RefSeq	tRNA	25644	25729	.	+	.	ID=rna2	Parent=gene22	Dbxref=GeneID:13315998	gbkey=tRNA	product=tRNA-Leu
NC_018143.2	RefSeq	exon	25644	25729	.	+	.	ID=id3	Parent=rna2	Dbxref=GeneID:13315998	gbkey=tRNA	product=tRNA-Leu
NC_018143.2	RefSeq	gene	25913	26881	.	-	.	ID=gene23	Name=RVBD_0021c	Dbxref=GeneID:13315999	gbkey=Gene	locus_tag=RVBD_0021c
NC_018143.2	RefSeq	CDS	25913	26881	.	-	0	ID=cds20	Name=YP_006513335.1	Parent=gene23	Dbxref=TubercuList:Rv0021c,Genbank:YP_006513335.1,GeneID:13315999	gbkey=CDS	product=nitronate monooxygenase	protein_id=YP_006513335.1	transl_table=11
NC_018143.2	RefSeq	gene	27023	27442	.	-	.	ID=gene24	Name=RVBD_0022c	Dbxref=GeneID:13316000	gbkey=Gene	locus_tag=RVBD_0022c
NC_018143.2	RefSeq	CDS	27023	27442	.	-	0	ID=cds21	Name=YP_006513336.1	Parent=gene24	Dbxref=TubercuList:Rv0022c,Genbank:YP_006513336.1,GeneID:13316000	gbkey=CDS	product=transcriptional regulator WhiB-like WhiB5	protein_id=YP_006513336.1	transl_table=11
NC_018143.2	RefSeq	gene	27595	28365	.	+	.	ID=gene25	Name=RVBD_0023	Dbxref=GeneID:13316001	gbkey=Gene	locus_tag=RVBD_0023
NC_018143.2	RefSeq	CDS	27595	28365	.	+	0	ID=cds22	Name=YP_006513337.1	Parent=gene25	Dbxref=TubercuList:Rv0023,Genbank:YP_006513337.1,GeneID:13316001	gbkey=CDS	product=transcriptional regulator	protein_id=YP_006513337.1	transl_table=11
NC_018143.2	RefSeq	gene	28362	29207	.	+	.	ID=gene26	Name=RVBD_0024	Dbxref=GeneID:13316002	gbkey=Gene	locus_tag=RVBD_0024
NC_018143.2	RefSeq	CDS	28362	29207	.	+	0	ID=cds23	Name=YP_006513338.1	Parent=gene26	Dbxref=TubercuList:Rv0024,Genbank:YP_006513338.1,GeneID:13316002	gbkey=CDS	product=secreted protein	protein_id=YP_006513338.1	transl_table=11
NC_018143.2	RefSeq	gene	29245	29607	.	+	.	ID=gene27	Name=RVBD_0025	Dbxref=GeneID:13316003	gbkey=Gene	locus_tag=RVBD_0025
NC_018143.2	RefSeq	CDS	29245	29607	.	+	0	ID=cds24	Name=YP_006513339.1	Parent=gene27	Dbxref=TubercuList:Rv0025,Genbank:YP_006513339.1,GeneID:13316003	gbkey=CDS	product=hypothetical protein	protein_id=YP_006513339.1	transl_table=11
NC_018143.2	RefSeq	gene	29722	31068	.	+	.	ID=gene28	Name=RVBD_0026	Dbxref=GeneID:13316004	gbkey=Gene	locus_tag=RVBD_0026
NC_018143.2	RefSeq	CDS	29722	31068	.	+	0	ID=cds25	Name=YP_006513340.1	Parent=gene28	Dbxref=TubercuList:Rv0026,Genbank:YP_006513340.1,GeneID:13316004	gbkey=CDS	product=hypothetical protein	protein_id=YP_006513340.1	transl_table=11
NC_018143.2	RefSeq	gene	31189	31506	.	+	.	ID=gene29	Name=RVBD_0027	Dbxref=GeneID:13316005	gbkey=Gene	locus_tag=RVBD_0027
NC_018143.2	RefSeq	CDS	31189	31506	.	+	0	ID=cds26	Name=YP_006513341.1	Parent=gene29	Dbxref=TubercuList:Rv0027,Genbank:YP_006513341.1,GeneID:13316005	gbkey=CDS	product=hypothetical protein	protein_id=YP_006513341.1	transl_table=11
NC_018143.2	RefSeq	gene	31514	31819	.	+	.	ID=gene30	Name=RVBD_0028	Dbxref=GeneID:13316006	gbkey=Gene	locus_tag=RVBD_0028
NC_018143.2	RefSeq	CDS	31514	31819	.	+	0	ID=cds27	Name=YP_006513342.1	Parent=gene30	Dbxref=TubercuList:Rv0028,Genbank:YP_006513342.1,GeneID:13316006	gbkey=CDS	product=hypothetical protein	protein_id=YP_006513342.1	transl_table=11
NC_018143.2	RefSeq	gene	32057	33154	.	+	.	ID=gene31	Name=RVBD_0029	Dbxref=GeneID:13316007	gbkey=Gene	locus_tag=RVBD_0029
NC_018143.2	RefSeq	CDS	32057	33154	.	+	0	ID=cds28	Name=YP_006513343.1	Parent=gene31	Dbxref=TubercuList:Rv0029,Genbank:YP_006513343.1,GeneID:13316007	gbkey=CDS	product=hypothetical protein	protein_id=YP_006513343.1	transl_table=11
NC_018143.2	RefSeq	gene	33224	33553	.	+	.	ID=gene32	Name=RVBD_0030	Dbxref=GeneID:13316008	gbkey=Gene	locus_tag=RVBD_0030
NC_018143.2	RefSeq	CDS	33224	33553	.	+	0	ID=cds29	Name=YP_006513344.1	Parent=gene32	Dbxref=TubercuList:Rv0030,Genbank:YP_006513344.1,GeneID:13316008	gbkey=CDS	product=hypothetical protein	protein_id=YP_006513344.1	transl_table=11
NC_018143.2	RefSeq	gene	33582	33794	.	+	.	ID=gene33	Name=RVBD_0031	Dbxref=GeneID:13316009	gbkey=Gene	locus_tag=RVBD_0031
NC_018143.2	RefSeq	CDS	33582	33794	.	+	0	ID=cds30	Name=YP_006513345.1	Parent=gene33	Dbxref=TubercuList:Rv0031,Genbank:YP_006513345.1,GeneID:13316009	gbkey=CDS	product=transposase	protein_id=YP_006513345.1	transl_table=11
NC_018143.2	RefSeq	gene	34295	36610	.	+	.	ID=gene34	Name=RVBD_0032	Dbxref=GeneID:13316010	gbkey=Gene	locus_tag=RVBD_0032
NC_018143.2	RefSeq	CDS	34295	36610	.	+	0	ID=cds31	Name=YP_006513346.1	Parent=gene34	Dbxref=TubercuList:Rv0032,Genbank:YP_006513346.1,GeneID:13316010	gbkey=CDS	product=8-amino-7-oxononanoate synthase BioF2	protein_id=YP_006513346.1	transl_table=11
NC_018143.2	RefSeq	gene	36607	36870	.	+	.	ID=gene35	Name=RVBD_0033	Dbxref=GeneID:13316011	gbkey=Gene	locus_tag=RVBD_0033
NC_018143.2	RefSeq	CDS	36607	36870	.	+	0	ID=cds32	Name=YP_006513347.1	Parent=gene35	Dbxref=TubercuList:Rv0033,Genbank:YP_006513347.1,GeneID:13316011	gbkey=CDS	product=acyl carrier protein AcpA	protein_id=YP_006513347.1	transl_table=11
NC_018143.2	RefSeq	gene	36867	37262	.	+	.	ID=gene36	Name=RVBD_0034	Dbxref=GeneID:13316012	gbkey=Gene	locus_tag=RVBD_0034
NC_018143.2	RefSeq	CDS	36867	37262	.	+	0	ID=cds33	Name=YP_006513348.1	Parent=gene36	Dbxref=TubercuList:Rv0034,Genbank:YP_006513348.1,GeneID:13316012	gbkey=CDS	product=hypothetical protein	protein_id=YP_006513348.1	transl_table=11
NC_018143.2	RefSeq	gene	37259	38947	.	+	.	ID=gene37	Name=RVBD_0035	Dbxref=GeneID:13316013	gbkey=Gene	locus_tag=RVBD_0035
NC_018143.2	RefSeq	CDS	37259	38947	.	+	0	ID=cds34	Name=YP_006513349.1	Parent=gene37	Dbxref=TubercuList:Rv0035,Genbank:YP_006513349.1,GeneID:13316013	gbkey=CDS	product=fatty-acid-CoA ligase FadD34	protein_id=YP_006513349.1	transl_table=11
NC_018143.2	RefSeq	gene	39056	39829	.	-	.	ID=gene38	Name=RVBD_0036c	Dbxref=GeneID:13316014	gbkey=Gene	locus_tag=RVBD_0036c
NC_018143.2	RefSeq	CDS	39056	39829	.	-	0	ID=cds35	Name=YP_006513350.1	Parent=gene38	Dbxref=TubercuList:Rv0036c,Genbank:YP_006513350.1,GeneID:13316014	gbkey=CDS	product=hypothetical protein	protein_id=YP_006513350.1	transl_table=11
NC_018143.2	RefSeq	gene	39877	41202	.	-	.	ID=gene39	Name=RVBD_0037c	Dbxref=GeneID:13316015	gbkey=Gene	locus_tag=RVBD_0037c
NC_018143.2	RefSeq	CDS	39877	41202	.	-	0	ID=cds36	Name=YP_006513351.1	Parent=gene39	Dbxref=TubercuList:Rv0037c,Genbank:YP_006513351.1,GeneID:13316015	gbkey=CDS	product=integral membrane protein	protein_id=YP_006513351.1	transl_table=11
NC_018143.2	RefSeq	gene	41304	41912	.	+	.	ID=gene40	Name=RVBD_0038	Dbxref=GeneID:13316016	gbkey=Gene	locus_tag=RVBD_0038
NC_018143.2	RefSeq	CDS	41304	41912	.	+	0	ID=cds37	Name=YP_006513352.1	Parent=gene40	Dbxref=TubercuList:Rv0038,Genbank:YP_006513352.1,GeneID:13316016	gbkey=CDS	product=transcriptional regulator	protein_id=YP_006513352.1	transl_table=11
NC_018143.2	RefSeq	gene	42004	42351	.	-	.	ID=gene41	Name=RVBD_0039c	Dbxref=GeneID:13316017	gbkey=Gene	locus_tag=RVBD_0039c
NC_018143.2	RefSeq	CDS	42004	42351	.	-	0	ID=cds38	Name=YP_006513353.1	Parent=gene41	Dbxref=TubercuList:Rv0039c,Genbank:YP_006513353.1,GeneID:13316017	gbkey=CDS	product=transmembrane protein	protein_id=YP_006513353.1	transl_table=11
NC_018143.2	RefSeq	gene	42433	43365	.	-	.	ID=gene42	Name=RVBD_0040c	Dbxref=GeneID:13316018	gbkey=Gene	locus_tag=RVBD_0040c
NC_018143.2	RefSeq	CDS	42433	43365	.	-	0	ID=cds39	Name=YP_006513354.1	Parent=gene42	Dbxref=TubercuList:Rv0040c,Genbank:YP_006513354.1,GeneID:13316018	gbkey=CDS	product=secreted proline rich protein Mtc28	protein_id=YP_006513354.1	transl_table=11
NC_018143.2	RefSeq	gene	43562	46471	.	+	.	ID=gene43	Name=RVBD_0041	Dbxref=GeneID:13316019	gbkey=Gene	locus_tag=RVBD_0041
NC_018143.2	RefSeq	CDS	43562	46471	.	+	0	ID=cds40	Name=YP_006513355.1	Parent=gene43	Dbxref=TubercuList:Rv0041,Genbank:YP_006513355.1,GeneID:13316019	gbkey=CDS	product=leucyl-tRNA synthetase LeuS	protein_id=YP_006513355.1	transl_table=11
NC_018143.2	RefSeq	gene	46581	47207	.	-	.	ID=gene44	Name=RVBD_0042c	Dbxref=GeneID:13316020	gbkey=Gene	locus_tag=RVBD_0042c
NC_018143.2	RefSeq	CDS	46581	47207	.	-	0	ID=cds41	Name=YP_006513356.1	Parent=gene44	Dbxref=TubercuList:Rv0042c,Genbank:YP_006513356.1,GeneID:13316020	gbkey=CDS	product=transcriptional regulator MarR-family	protein_id=YP_006513356.1	transl_table=11
NC_018143.2	RefSeq	gene	47366	48100	.	-	.	ID=gene45	Name=RVBD_0043c	Dbxref=GeneID:13316021	gbkey=Gene	locus_tag=RVBD_0043c
NC_018143.2	RefSeq	CDS	47366	48100	.	-	0	ID=cds42	Name=YP_006513357.1	Parent=gene45	Dbxref=TubercuList:Rv0043c,Genbank:YP_006513357.1,GeneID:13316021	gbkey=CDS	product=transcriptional regulator GntR-family	protein_id=YP_006513357.1	transl_table=11
NC_018143.2	RefSeq	gene	48233	49027	.	-	.	ID=gene46	Name=RVBD_0044c	Dbxref=GeneID:13316022	gbkey=Gene	locus_tag=RVBD_0044c
NC_018143.2	RefSeq	CDS	48233	49027	.	-	0	ID=cds43	Name=YP_006513358.1	Parent=gene46	Dbxref=TubercuList:Rv0044c,Genbank:YP_006513358.1,GeneID:13316022	gbkey=CDS	product=oxidoreductase	protein_id=YP_006513358.1	transl_table=11
NC_018143.2	RefSeq	gene	49043	49939	.	-	.	ID=gene47	Name=RVBD_0045c	Dbxref=GeneID:13316023	gbkey=Gene	locus_tag=RVBD_0045c
NC_018143.2	RefSeq	CDS	49043	49939	.	-	0	ID=cds44	Name=YP_006513359.1	Parent=gene47	Dbxref=TubercuList:Rv0045c,Genbank:YP_006513359.1,GeneID:13316023	gbkey=CDS	product=hydrolase	protein_id=YP_006513359.1	transl_table=11
NC_018143.2	RefSeq	gene	50021	51124	.	-	.	ID=gene48	Name=RVBD_0046c	Dbxref=GeneID:13316024	gbkey=Gene	locus_tag=RVBD_0046c
NC_018143.2	RefSeq	CDS	50021	51124	.	-	0	ID=cds45	Name=YP_006513360.1	Parent=gene48	Dbxref=TubercuList:Rv0046c,Genbank:YP_006513360.1,GeneID:13316024	gbkey=CDS	product=myo-inositol-1-phosphate synthase Ino1	protein_id=YP_006513360.1	transl_table=11
NC_018143.2	RefSeq	gene	51185	51727	.	-	.	ID=gene49	Name=RVBD_0047c	Dbxref=GeneID:13316025	gbkey=Gene	locus_tag=RVBD_0047c
NC_018143.2	RefSeq	CDS	51185	51727	.	-	0	ID=cds46	Name=YP_006513361.1	Parent=gene49	Dbxref=TubercuList:Rv0047c,Genbank:YP_006513361.1,GeneID:13316025	gbkey=CDS	product=hypothetical protein	protein_id=YP_006513361.1	transl_table=11
NC_018143.2	RefSeq	gene	51828	52697	.	-	.	ID=gene50	Name=RVBD_0048c	Dbxref=GeneID:13316026	gbkey=Gene	locus_tag=RVBD_0048c
NC_018143.2	RefSeq	CDS	51828	52697	.	-	0	ID=cds47	Name=YP_006513362.1	Parent=gene50	Dbxref=TubercuList:Rv0048c,Genbank:YP_006513362.1,GeneID:13316026	gbkey=CDS	product=membrane protein	protein_id=YP_006513362.1	transl_table=11
NC_018143.2	RefSeq	gene	52831	53244	.	+	.	ID=gene51	Name=RVBD_0049	Dbxref=GeneID:13316027	gbkey=Gene	locus_tag=RVBD_0049
NC_018143.2	RefSeq	CDS	52831	53244	.	+	0	ID=cds48	Name=YP_006513363.1	Parent=gene51	Dbxref=TubercuList:Rv0049,Genbank:YP_006513363.1,GeneID:13316027	gbkey=CDS	product=hypothetical protein	protein_id=YP_006513363.1	transl_table=11
NC_018143.2	RefSeq	gene	53663	55696	.	+	.	ID=gene52	Name=RVBD_0050	Dbxref=GeneID:13316028	gbkey=Gene	locus_tag=RVBD_0050
NC_018143.2	RefSeq	CDS	53663	55696	.	+	0	ID=cds49	Name=YP_006513364.1	Parent=gene52	Dbxref=TubercuList:Rv0050,Genbank:YP_006513364.1,GeneID:13316028	gbkey=CDS	product=bifunctional penicillin-binding protein 1A%2F1B PonA1	protein_id=YP_006513364.1	transl_table=11
NC_018143.2	RefSeq	gene	55693	57375	.	+	.	ID=gene53	Name=RVBD_0051	Dbxref=GeneID:13316029	gbkey=Gene	locus_tag=RVBD_0051
NC_018143.2	RefSeq	CDS	55693	57375	.	+	0	ID=cds50	Name=YP_006513365.1	Parent=gene53	Dbxref=TubercuList:Rv0051,Genbank:YP_006513365.1,GeneID:13316029	gbkey=CDS	product=transmembrane protein	protein_id=YP_006513365.1	transl_table=11
NC_018143.2	RefSeq	gene	57407	57970	.	+	.	ID=gene54	Name=RVBD_0052	Dbxref=GeneID:13316030	gbkey=Gene	locus_tag=RVBD_0052
NC_018143.2	RefSeq	CDS	57407	57970	.	+	0	ID=cds51	Name=YP_006513366.2	Parent=gene54	Dbxref=TubercuList:Rv0052,Genbank:YP_006513366.2,GeneID:13316030	gbkey=CDS	product=hypothetical protein	protein_id=YP_006513366.2	transl_table=11
NC_018143.2	RefSeq	gene	58189	58479	.	+	.	ID=gene55	Name=RVBD_0053	Dbxref=GeneID:13316031	gbkey=Gene	locus_tag=RVBD_0053
NC_018143.2	RefSeq	CDS	58189	58479	.	+	0	ID=cds52	Name=YP_006513367.1	Parent=gene55	Dbxref=TubercuList:Rv0053,Genbank:YP_006513367.1,GeneID:13316031	gbkey=CDS	product=30S ribosomal protein S6 RpsF	protein_id=YP_006513367.1	transl_table=11
NC_018143.2	RefSeq	gene	58583	59077	.	+	.	ID=gene56	Name=RVBD_0054	Dbxref=GeneID:13316032	gbkey=Gene	locus_tag=RVBD_0054
NC_018143.2	RefSeq	CDS	58583	59077	.	+	0	ID=cds53	Name=YP_006513368.1	Parent=gene56	Dbxref=TubercuList:Rv0054,Genbank:YP_006513368.1,GeneID:13316032	gbkey=CDS	product=single-strand DNA-binding protein Ssb	protein_id=YP_006513368.1	transl_table=11
NC_018143.2	RefSeq	gene	59119	59373	.	+	.	ID=gene57	Name=RVBD_0055	Dbxref=GeneID:13316033	gbkey=Gene	locus_tag=RVBD_0055
NC_018143.2	RefSeq	CDS	59119	59373	.	+	0	ID=cds54	Name=YP_006513369.1	Parent=gene57	Dbxref=TubercuList:Rv0055,Genbank:YP_006513369.1,GeneID:13316033	gbkey=CDS	product=30S ribosomal protein S18 RpsR1	protein_id=YP_006513369.1	transl_table=11
NC_018143.2	RefSeq	gene	59406	59864	.	+	.	ID=gene58	Name=RVBD_0056	Dbxref=GeneID:13316034	gbkey=Gene	locus_tag=RVBD_0056
NC_018143.2	RefSeq	CDS	59406	59864	.	+	0	ID=cds55	Name=YP_006513370.1	Parent=gene58	Dbxref=TubercuList:Rv0056,Genbank:YP_006513370.1,GeneID:13316034	gbkey=CDS	product=50S ribosomal protein L9 RplI	protein_id=YP_006513370.1	transl_table=11
NC_018143.2	RefSeq	gene	59893	60414	.	+	.	ID=gene59	Name=RVBD_0057	Dbxref=GeneID:13316035	gbkey=Gene	locus_tag=RVBD_0057
NC_018143.2	RefSeq	CDS	59893	60414	.	+	0	ID=cds56	Name=YP_006513371.1	Parent=gene59	Dbxref=TubercuList:Rv0057,Genbank:YP_006513371.1,GeneID:13316035	gbkey=CDS	product=hypothetical protein	protein_id=YP_006513371.1	transl_table=11
NC_018143.2	RefSeq	gene	60393	63017	.	+	.	ID=gene60	Name=RVBD_0058	Dbxref=GeneID:13316036	gbkey=Gene	locus_tag=RVBD_0058
NC_018143.2	RefSeq	CDS	60393	63017	.	+	0	ID=cds57	Name=YP_006513372.1	Parent=gene60	Dbxref=TubercuList:Rv0058,Genbank:YP_006513372.1,GeneID:13316036	gbkey=CDS	product=replicative DNA helicase DnaB	protein_id=YP_006513372.1	transl_table=11
NC_018143.2	RefSeq	gene	63197	63889	.	+	.	ID=gene61	Name=RVBD_0059	Dbxref=GeneID:13316037	gbkey=Gene	locus_tag=RVBD_0059
NC_018143.2	RefSeq	CDS	63197	63889	.	+	0	ID=cds58	Name=YP_006513373.1	Parent=gene61	Dbxref=TubercuList:Rv0059,Genbank:YP_006513373.1,GeneID:13316037	gbkey=CDS	product=hypothetical protein	protein_id=YP_006513373.1	transl_table=11
NC_018143.2	RefSeq	gene	63906	64964	.	+	.	ID=gene62	Name=RVBD_0060	Dbxref=GeneID:13316038	gbkey=Gene	locus_tag=RVBD_0060
NC_018143.2	RefSeq	CDS	63906	64964	.	+	0	ID=cds59	Name=YP_006513374.1	Parent=gene62	Dbxref=TubercuList:Rv0060,Genbank:YP_006513374.1,GeneID:13316038	gbkey=CDS	product=hypothetical protein	protein_id=YP_006513374.1	transl_table=11
NC_018143.2	RefSeq	gene	65009	65347	.	-	.	ID=gene63	Name=RVBD_0061c	Dbxref=GeneID:13316039	gbkey=Gene	locus_tag=RVBD_0061c	old_locus_tag=RVBD_0061Ac
NC_018143.2	RefSeq	CDS	65009	65347	.	-	0	ID=cds60	Name=YP_006513375.1	Parent=gene63	Dbxref=TubercuList:Rv0061c,Genbank:YP_006513375.1,GeneID:13316039	gbkey=CDS	product=hypothetical protein	protein_id=YP_006513375.1	transl_table=11
NC_018143.2	RefSeq	gene	65549	66691	.	+	.	ID=gene64	Name=RVBD_0062	Dbxref=GeneID:13316040	gbkey=Gene	locus_tag=RVBD_0062
NC_018143.2	RefSeq	CDS	65549	66691	.	+	0	ID=cds61	Name=YP_006513376.1	Parent=gene64	Dbxref=TubercuList:Rv0062,Genbank:YP_006513376.1,GeneID:13316040	gbkey=CDS	product=cellulase CelA1	protein_id=YP_006513376.1	transl_table=11
NC_018143.2	RefSeq	gene	66920	68359	.	+	.	ID=gene65	Name=RVBD_0063	Dbxref=GeneID:13316041	gbkey=Gene	locus_tag=RVBD_0063
NC_018143.2	RefSeq	CDS	66920	68359	.	+	0	ID=cds62	Name=YP_006513377.1	Parent=gene65	Dbxref=TubercuList:Rv0063,Genbank:YP_006513377.1,GeneID:13316041	gbkey=CDS	product=oxidoreductase	protein_id=YP_006513377.1	transl_table=11
NC_018143.2	RefSeq	gene	68617	71556	.	+	.	ID=gene66	Name=RVBD_0064	Dbxref=GeneID:13316042	gbkey=Gene	locus_tag=RVBD_0064
NC_018143.2	RefSeq	CDS	68617	71556	.	+	0	ID=cds63	Name=YP_006513378.1	Parent=gene66	Dbxref=TubercuList:Rv0064,Genbank:YP_006513378.1,GeneID:13316042	gbkey=CDS	product=transmembrane protein	protein_id=YP_006513378.1	transl_table=11
NC_018143.2	RefSeq	gene	71586	71825	.	+	.	ID=gene67	Name=RVBD_0064A	Dbxref=GeneID:13316043	gbkey=Gene	locus_tag=RVBD_0064A
NC_018143.2	RefSeq	CDS	71586	71825	.	+	0	ID=cds64	Name=YP_006513379.1	Parent=gene67	Dbxref=TubercuList:Rv0064A,Genbank:YP_006513379.1,GeneID:13316043	gbkey=CDS	product=antitoxin VapB1	protein_id=YP_006513379.1	transl_table=11
NC_018143.2	RefSeq	gene	71818	72219	.	+	.	ID=gene68	Name=RVBD_0065	Dbxref=GeneID:13316044	gbkey=Gene	locus_tag=RVBD_0065
NC_018143.2	RefSeq	CDS	71818	72219	.	+	0	ID=cds65	Name=YP_006513380.1	Parent=gene68	Dbxref=TubercuList:Rv0065,Genbank:YP_006513380.1,GeneID:13316044	gbkey=CDS	product=toxin VapC1	protein_id=YP_006513380.1	transl_table=11
NC_018143.2	RefSeq	gene	72271	74508	.	-	.	ID=gene69	Name=RVBD_0066c	Dbxref=GeneID:13316045	gbkey=Gene	locus_tag=RVBD_0066c
NC_018143.2	RefSeq	CDS	72271	74508	.	-	0	ID=cds66	Name=YP_006513381.1	Parent=gene69	Dbxref=TubercuList:Rv0066c,Genbank:YP_006513381.1,GeneID:13316045	gbkey=CDS	product=isocitrate dehydrogenase Icd2	protein_id=YP_006513381.1	transl_table=11
NC_018143.2	RefSeq	gene	74626	75195	.	-	.	ID=gene70	Name=RVBD_0067c	Dbxref=GeneID:13316046	gbkey=Gene	locus_tag=RVBD_0067c
NC_018143.2	RefSeq	CDS	74626	75195	.	-	0	ID=cds67	Name=YP_006513382.1	Parent=gene70	Dbxref=TubercuList:Rv0067c,Genbank:YP_006513382.1,GeneID:13316046	gbkey=CDS	product=transcriptional regulator TetR-family	protein_id=YP_006513382.1	transl_table=11
NC_018143.2	RefSeq	gene	75298	76209	.	+	.	ID=gene71	Name=RVBD_0068	Dbxref=GeneID:13316047	gbkey=Gene	locus_tag=RVBD_0068
NC_018143.2	RefSeq	CDS	75298	76209	.	+	0	ID=cds68	Name=YP_006513383.1	Parent=gene71	Dbxref=TubercuList:Rv0068,Genbank:YP_006513383.1,GeneID:13316047	gbkey=CDS	product=oxidoreductase	protein_id=YP_006513383.1	transl_table=11
NC_018143.2	RefSeq	gene	76234	77619	.	-	.	ID=gene72	Name=RVBD_0069c	Dbxref=GeneID:13316048	gbkey=Gene	locus_tag=RVBD_0069c
NC_018143.2	RefSeq	CDS	76234	77619	.	-	0	ID=cds69	Name=YP_006513384.1	Parent=gene72	Dbxref=TubercuList:Rv0069c,Genbank:YP_006513384.1,GeneID:13316048	gbkey=CDS	product=l-serine dehydratase SdaA	protein_id=YP_006513384.1	transl_table=11
NC_018143.2	RefSeq	gene	77616	78893	.	-	.	ID=gene73	Name=RVBD_0070c	Dbxref=GeneID:13316049	gbkey=Gene	locus_tag=RVBD_0070c
NC_018143.2	RefSeq	CDS	77616	78893	.	-	0	ID=cds70	Name=YP_006513385.1	Parent=gene73	Dbxref=TubercuList:Rv0070c,Genbank:YP_006513385.1,GeneID:13316049	gbkey=CDS	product=serine hydroxymethyltransferase GlyA2	protein_id=YP_006513385.1	transl_table=11
NC_018143.2	RefSeq	gene	79483	80190	.	+	.	ID=gene74	Name=RVBD_0071	Dbxref=GeneID:13316050	gbkey=Gene	locus_tag=RVBD_0071
NC_018143.2	RefSeq	CDS	79483	80190	.	+	0	ID=cds71	Name=YP_006513386.1	Parent=gene74	Dbxref=TubercuList:Rv0071,Genbank:YP_006513386.1,GeneID:13316050	gbkey=CDS	product=RNA-directed DNA polymerase	protein_id=YP_006513386.1	transl_table=11
NC_018143.2	RefSeq	gene	80621	81670	.	+	.	ID=gene75	Name=RVBD_0072	Dbxref=GeneID:13316051	gbkey=Gene	locus_tag=RVBD_0072
NC_018143.2	RefSeq	CDS	80621	81670	.	+	0	ID=cds72	Name=YP_006513387.1	Parent=gene75	Dbxref=TubercuList:Rv0072,Genbank:YP_006513387.1,GeneID:13316051	gbkey=CDS	product=glutamine-transport ABC transporter transmembrane protein	protein_id=YP_006513387.1	transl_table=11
NC_018143.2	RefSeq	gene	81673	82665	.	+	.	ID=gene76	Name=RVBD_0073	Dbxref=GeneID:13316052	gbkey=Gene	locus_tag=RVBD_0073
NC_018143.2	RefSeq	CDS	81673	82665	.	+	0	ID=cds73	Name=YP_006513388.1	Parent=gene76	Dbxref=TubercuList:Rv0073,Genbank:YP_006513388.1,GeneID:13316052	gbkey=CDS	product=glutamine-transport ABC transporter ATP-binding protein	protein_id=YP_006513388.1	transl_table=11
NC_018143.2	RefSeq	gene	82745	83980	.	+	.	ID=gene77	Name=RVBD_0074	Dbxref=GeneID:13316053	gbkey=Gene	locus_tag=RVBD_0074
NC_018143.2	RefSeq	CDS	82745	83980	.	+	0	ID=cds74	Name=YP_006513389.1	Parent=gene77	Dbxref=TubercuList:Rv0074,Genbank:YP_006513389.1,GeneID:13316053	gbkey=CDS	product=hypothetical protein	protein_id=YP_006513389.1	transl_table=11
NC_018143.2	RefSeq	gene	83993	85165	.	+	.	ID=gene78	Name=RVBD_0075	Dbxref=GeneID:13316054	gbkey=Gene	locus_tag=RVBD_0075
NC_018143.2	RefSeq	CDS	83993	85165	.	+	0	ID=cds75	Name=YP_006513390.1	Parent=gene78	Dbxref=TubercuList:Rv0075,Genbank:YP_006513390.1,GeneID:13316054	gbkey=CDS	product=cystathionine beta-lyase	protein_id=YP_006513390.1	transl_table=11
NC_018143.2	RefSeq	gene	85180	85569	.	-	.	ID=gene79	Name=RVBD_0076c	Dbxref=GeneID:13316055	gbkey=Gene	locus_tag=RVBD_0076c
NC_018143.2	RefSeq	CDS	85180	85569	.	-	0	ID=cds76	Name=YP_006513391.1	Parent=gene79	Dbxref=TubercuList:Rv0076c,Genbank:YP_006513391.1,GeneID:13316055	gbkey=CDS	product=membrane protein	protein_id=YP_006513391.1	transl_table=11
NC_018143.2	RefSeq	gene	85633	86463	.	-	.	ID=gene80	Name=RVBD_0077c	Dbxref=GeneID:13316056	gbkey=Gene	locus_tag=RVBD_0077c
NC_018143.2	RefSeq	CDS	85633	86463	.	-	0	ID=cds77	Name=YP_006513392.1	Parent=gene80	Dbxref=TubercuList:Rv0077c,Genbank:YP_006513392.1,GeneID:13316056	gbkey=CDS	product=oxidoreductase	protein_id=YP_006513392.1	transl_table=11
NC_018143.2	RefSeq	gene	86525	87130	.	+	.	ID=gene81	Name=RVBD_0078	Dbxref=GeneID:13316057	gbkey=Gene	locus_tag=RVBD_0078
NC_018143.2	RefSeq	CDS	86525	87130	.	+	0	ID=cds78	Name=YP_006513393.1	Parent=gene81	Dbxref=TubercuList:Rv0078,Genbank:YP_006513393.1,GeneID:13316057	gbkey=CDS	product=transcriptional regulator	protein_id=YP_006513393.1	transl_table=11
NC_018143.2	RefSeq	gene	87205	87798	.	-	.	ID=gene82	Name=RVBD_0078A	Dbxref=GeneID:13316058	gbkey=Gene	locus_tag=RVBD_0078A
NC_018143.2	RefSeq	CDS	87205	87798	.	-	0	ID=cds79	Name=YP_006513394.1	Parent=gene82	Dbxref=TubercuList:Rv0078A,Genbank:YP_006513394.1,GeneID:13316058	gbkey=CDS	product=hypothetical protein	protein_id=YP_006513394.1	transl_table=11
NC_018143.2	RefSeq	gene	87795	88001	.	-	.	ID=gene83	Name=RVBD_0078B	Dbxref=GeneID:13316059	gbkey=Gene	locus_tag=RVBD_0078B	old_locus_tag=RVBD_0078Bc
NC_018143.2	RefSeq	CDS	87795	88001	.	-	0	ID=cds80	Name=YP_006513395.1	Parent=gene83	Dbxref=TubercuList:Rv0078B,Genbank:YP_006513395.1,GeneID:13316059	gbkey=CDS	product=hypothetical protein	protein_id=YP_006513395.1	transl_table=11
NC_018143.2	RefSeq	gene	88201	89022	.	+	.	ID=gene84	Name=RVBD_0079	Dbxref=GeneID:13316060	gbkey=Gene	locus_tag=RVBD_0079
NC_018143.2	RefSeq	CDS	88201	89022	.	+	0	ID=cds81	Name=YP_006513396.1	Parent=gene84	Dbxref=TubercuList:Rv0079,Genbank:YP_006513396.1,GeneID:13316060	gbkey=CDS	product=hypothetical protein	protein_id=YP_006513396.1	transl_table=11
NC_018143.2	RefSeq	gene	89019	89477	.	+	.	ID=gene85	Name=RVBD_0080	Dbxref=GeneID:13316061	gbkey=Gene	locus_tag=RVBD_0080
NC_018143.2	RefSeq	CDS	89019	89477	.	+	0	ID=cds82	Name=YP_006513397.1	Parent=gene85	Dbxref=TubercuList:Rv0080,Genbank:YP_006513397.1,GeneID:13316061	gbkey=CDS	product=hypothetical protein	protein_id=YP_006513397.1	transl_table=11
NC_018143.2	RefSeq	gene	89572	89916	.	+	.	ID=gene86	Name=RVBD_0081	Dbxref=GeneID:13316062	gbkey=Gene	locus_tag=RVBD_0081
NC_018143.2	RefSeq	CDS	89572	89916	.	+	0	ID=cds83	Name=YP_006513398.1	Parent=gene86	Dbxref=TubercuList:Rv0081,Genbank:YP_006513398.1,GeneID:13316062	gbkey=CDS	product=ArsR family transcriptional regulator	protein_id=YP_006513398.1	transl_table=11
NC_018143.2	RefSeq	gene	89921	90400	.	+	.	ID=gene87	Name=RVBD_0082	Dbxref=GeneID:13316063	gbkey=Gene	locus_tag=RVBD_0082
NC_018143.2	RefSeq	CDS	89921	90400	.	+	0	ID=cds84	Name=YP_006513399.1	Parent=gene87	Note=overlaps another CDS with the same product name	Dbxref=TubercuList:Rv0082,Genbank:YP_006513399.1,GeneID:13316063	gbkey=CDS	product=oxidoreductase	protein_id=YP_006513399.1	transl_table=11
NC_018143.2	RefSeq	gene	90397	92319	.	+	.	ID=gene88	Name=RVBD_0083	Dbxref=GeneID:13316064	gbkey=Gene	locus_tag=RVBD_0083
NC_018143.2	RefSeq	CDS	90397	92319	.	+	0	ID=cds85	Name=YP_006513400.1	Parent=gene88	Note=overlaps another CDS with the same product name	Dbxref=TubercuList:Rv0083,Genbank:YP_006513400.1,GeneID:13316064	gbkey=CDS	product=oxidoreductase	protein_id=YP_006513400.1	transl_table=11
NC_018143.2	RefSeq	gene	92325	93275	.	+	.	ID=gene89	Name=RVBD_0084	Dbxref=GeneID:13316065	gbkey=Gene	locus_tag=RVBD_0084
NC_018143.2	RefSeq	CDS	92325	93275	.	+	0	ID=cds86	Name=YP_006513401.1	Parent=gene89	Dbxref=TubercuList:Rv0084,Genbank:YP_006513401.1,GeneID:13316065	gbkey=CDS	product=formate hydrogenlyase HycD	protein_id=YP_006513401.1	transl_table=11
NC_018143.2	RefSeq	gene	93286	93948	.	+	.	ID=gene90	Name=RVBD_0085	Dbxref=GeneID:13316066	gbkey=Gene	locus_tag=RVBD_0085
NC_018143.2	RefSeq	CDS	93286	93948	.	+	0	ID=cds87	Name=YP_006513402.1	Parent=gene90	Dbxref=TubercuList:Rv0085,Genbank:YP_006513402.1,GeneID:13316066	gbkey=CDS	product=hydrogenase HycP	protein_id=YP_006513402.1	transl_table=11
NC_018143.2	RefSeq	gene	93948	95414	.	+	.	ID=gene91	Name=RVBD_0086	Dbxref=GeneID:13316067	gbkey=Gene	locus_tag=RVBD_0086
NC_018143.2	RefSeq	CDS	93948	95414	.	+	0	ID=cds88	Name=YP_006513403.1	Parent=gene91	Dbxref=TubercuList:Rv0086,Genbank:YP_006513403.1,GeneID:13316067	gbkey=CDS	product=hydrogenase HycQ	protein_id=YP_006513403.1	transl_table=11
NC_018143.2	RefSeq	gene	95411	96889	.	+	.	ID=gene92	Name=RVBD_0087	Dbxref=GeneID:13316068	gbkey=Gene	locus_tag=RVBD_0087
NC_018143.2	RefSeq	CDS	95411	96889	.	+	0	ID=cds89	Name=YP_006513404.1	Parent=gene92	Dbxref=TubercuList:Rv0087,Genbank:YP_006513404.1,GeneID:13316068	gbkey=CDS	product=formate hydrogenase HycE	protein_id=YP_006513404.1	transl_table=11
NC_018143.2	RefSeq	gene	96924	97598	.	+	.	ID=gene93	Name=RVBD_0088	Dbxref=GeneID:13316069	gbkey=Gene	locus_tag=RVBD_0088
NC_018143.2	RefSeq	CDS	96924	97598	.	+	0	ID=cds90	Name=YP_006513405.1	Parent=gene93	Dbxref=TubercuList:Rv0088,Genbank:YP_006513405.1,GeneID:13316069	gbkey=CDS	product=polyketide cyclase%2Fdehydrase	protein_id=YP_006513405.1	transl_table=11
NC_018143.2	RefSeq	gene	97755	98348	.	+	.	ID=gene94	Name=RVBD_0089	Dbxref=GeneID:13316070	gbkey=Gene	locus_tag=RVBD_0089
NC_018143.2	RefSeq	CDS	97755	98348	.	+	0	ID=cds91	Name=YP_006513406.1	Parent=gene94	Dbxref=TubercuList:Rv0089,Genbank:YP_006513406.1,GeneID:13316070	gbkey=CDS	product=methyltransferase	protein_id=YP_006513406.1	transl_table=11
NC_018143.2	RefSeq	gene	98477	99247	.	+	.	ID=gene95	Name=RVBD_0090	Dbxref=GeneID:13316071	gbkey=Gene	locus_tag=RVBD_0090
NC_018143.2	RefSeq	CDS	98477	99247	.	+	0	ID=cds92	Name=YP_006513407.1	Parent=gene95	Dbxref=TubercuList:Rv0090,Genbank:YP_006513407.1,GeneID:13316071	gbkey=CDS	product=membrane protein	protein_id=YP_006513407.1	transl_table=11
NC_018143.2	RefSeq	gene	99681	100448	.	+	.	ID=gene96	Name=RVBD_0091	Dbxref=GeneID:13316073	gbkey=Gene	locus_tag=RVBD_0091
NC_018143.2	RefSeq	CDS	99681	100448	.	+	0	ID=cds93	Name=YP_006513409.1	Parent=gene96	Dbxref=TubercuList:Rv0091,Genbank:YP_006513409.1,GeneID:13316073	gbkey=CDS	product=bifunctional MTA%2FSAH nucleosidase Mtn	protein_id=YP_006513409.1	transl_table=11
NC_018143.2	RefSeq	gene	100580	102865	.	+	.	ID=gene97	Name=RVBD_0092	Dbxref=GeneID:13316074	gbkey=Gene	locus_tag=RVBD_0092
NC_018143.2	RefSeq	CDS	100580	102865	.	+	0	ID=cds94	Name=YP_006513410.1	Parent=gene97	Dbxref=TubercuList:Rv0092,Genbank:YP_006513410.1,GeneID:13316074	gbkey=CDS	product=cation transporter P-type ATPase CtpA	protein_id=YP_006513410.1	transl_table=11
NC_018143.2	RefSeq	gene	102812	103660	.	-	.	ID=gene98	Name=RVBD_0093c	Dbxref=GeneID:13316075	gbkey=Gene	locus_tag=RVBD_0093c
NC_018143.2	RefSeq	CDS	102812	103660	.	-	0	ID=cds95	Name=YP_006513411.1	Parent=gene98	Dbxref=TubercuList:Rv0093c,Genbank:YP_006513411.1,GeneID:13316075	gbkey=CDS	product=membrane protein	protein_id=YP_006513411.1	transl_table=11
NC_018143.2	RefSeq	gene	103707	104660	.	-	.	ID=gene99	Name=RVBD_0094c	Dbxref=GeneID:13316076	gbkey=Gene	locus_tag=RVBD_0094c
NC_018143.2	RefSeq	CDS	103707	104660	.	-	0	ID=cds96	Name=YP_006513412.1	Parent=gene99	Dbxref=TubercuList:Rv0094c,Genbank:YP_006513412.1,GeneID:13316076	gbkey=CDS	product=hypothetical protein	protein_id=YP_006513412.1	transl_table=11
NC_018143.2	RefSeq	gene	104802	105212	.	-	.	ID=gene100	Name=RVBD_0095c	Dbxref=GeneID:13316077	gbkey=Gene	locus_tag=RVBD_0095c
NC_018143.2	RefSeq	CDS	104802	105212	.	-	0	ID=cds97	Name=YP_006513413.1	Parent=gene100	Dbxref=TubercuList:Rv0095c,Genbank:YP_006513413.1,GeneID:13316077	gbkey=CDS	product=hypothetical protein	protein_id=YP_006513413.1	transl_table=11
NC_018143.2	RefSeq	gene	105321	106712	.	+	.	ID=gene101	Name=RVBD_0096	Dbxref=GeneID:13316078	gbkey=Gene	locus_tag=RVBD_0096
NC_018143.2	RefSeq	CDS	105321	106712	.	+	0	ID=cds98	Name=YP_006513414.1	Parent=gene101	Dbxref=TubercuList:Rv0096,Genbank:YP_006513414.1,GeneID:13316078	gbkey=CDS	product=PPE family protein PPE1	protein_id=YP_006513414.1	transl_table=11
NC_018143.2	RefSeq	gene	106731	107600	.	+	.	ID=gene102	Name=RVBD_0097	Dbxref=GeneID:13316079	gbkey=Gene	locus_tag=RVBD_0097
NC_018143.2	RefSeq	CDS	106731	107600	.	+	0	ID=cds99	Name=YP_006513415.1	Parent=gene102	Dbxref=TubercuList:Rv0097,Genbank:YP_006513415.1,GeneID:13316079	gbkey=CDS	product=oxidoreductase	protein_id=YP_006513415.1	transl_table=11
NC_018143.2	RefSeq	gene	107597	108148	.	+	.	ID=gene103	Name=RVBD_0098	Dbxref=GeneID:13316080	gbkey=Gene	locus_tag=RVBD_0098
NC_018143.2	RefSeq	CDS	107597	108148	.	+	0	ID=cds100	Name=YP_006513416.1	Parent=gene103	Dbxref=TubercuList:Rv0098,Genbank:YP_006513416.1,GeneID:13316080	gbkey=CDS	product=fatty-acyl-CoA thioesterase type III FcoT	protein_id=YP_006513416.1	transl_table=11
NC_018143.2	RefSeq	gene	108153	109775	.	+	.	ID=gene104	Name=RVBD_0099	Dbxref=GeneID:13316081	gbkey=Gene	locus_tag=RVBD_0099
NC_018143.2	RefSeq	CDS	108153	109775	.	+	0	ID=cds101	Name=YP_006513417.1	Parent=gene104	Dbxref=TubercuList:Rv0099,Genbank:YP_006513417.1,GeneID:13316081	gbkey=CDS	product=fatty-acid-CoA ligase FadD10	protein_id=YP_006513417.1	transl_table=11
NC_018143.2	RefSeq	gene	109780	110016	.	+	.	ID=gene105	Name=RVBD_0100	Dbxref=GeneID:13316082	gbkey=Gene	locus_tag=RVBD_0100
NC_018143.2	RefSeq	CDS	109780	110016	.	+	0	ID=cds102	Name=YP_006513418.1	Parent=gene105	Dbxref=TubercuList:Rv0100,Genbank:YP_006513418.1,GeneID:13316082	gbkey=CDS	product=hypothetical protein	protein_id=YP_006513418.1	transl_table=11
NC_018143.2	RefSeq	gene	109998	117536	.	+	.	ID=gene106	Name=RVBD_0101	Dbxref=GeneID:13316083	gbkey=Gene	locus_tag=RVBD_0101
NC_018143.2	RefSeq	CDS	109998	117536	.	+	0	ID=cds103	Name=YP_006513419.1	Parent=gene106	Dbxref=TubercuList:Rv0101,Genbank:YP_006513419.1,GeneID:13316083	gbkey=CDS	product=peptide synthetase Nrp	protein_id=YP_006513419.1	transl_table=11
NC_018143.2	RefSeq	gene	117711	119696	.	+	.	ID=gene107	Name=RVBD_0102	Dbxref=GeneID:13316084	gbkey=Gene	locus_tag=RVBD_0102
NC_018143.2	RefSeq	CDS	117711	119696	.	+	0	ID=cds104	Name=YP_006513420.1	Parent=gene107	Dbxref=TubercuList:Rv0102,Genbank:YP_006513420.1,GeneID:13316084	gbkey=CDS	product=membrane protein	protein_id=YP_006513420.1	transl_table=11
NC_018143.2	RefSeq	gene	119912	122170	.	-	.	ID=gene108	Name=RVBD_0103c	Dbxref=GeneID:13316085	gbkey=Gene	locus_tag=RVBD_0103c
NC_018143.2	RefSeq	CDS	119912	122170	.	-	0	ID=cds105	Name=YP_006513421.1	Parent=gene108	Dbxref=TubercuList:Rv0103c,Genbank:YP_006513421.1,GeneID:13316085	gbkey=CDS	product=cation-transporter P-type ATPase CtpB	protein_id=YP_006513421.1	transl_table=11
NC_018143.2	RefSeq	gene	122314	123828	.	+	.	ID=gene109	Name=RVBD_0104	Dbxref=GeneID:13316086	gbkey=Gene	locus_tag=RVBD_0104
NC_018143.2	RefSeq	CDS	122314	123828	.	+	0	ID=cds106	Name=YP_006513422.1	Parent=gene109	Dbxref=TubercuList:Rv0104,Genbank:YP_006513422.1,GeneID:13316086	gbkey=CDS	product=hypothetical protein	protein_id=YP_006513422.1	transl_table=11
NC_018143.2	RefSeq	gene	123977	124261	.	-	.	ID=gene110	Name=RVBD_0105c	Dbxref=GeneID:13316087	gbkey=Gene	locus_tag=RVBD_0105c
NC_018143.2	RefSeq	CDS	123977	124261	.	-	0	ID=cds107	Name=YP_006513423.1	Parent=gene110	Dbxref=TubercuList:Rv0105c,Genbank:YP_006513423.1,GeneID:13316087	gbkey=CDS	product=50S ribosomal protein L28 RpmB1	protein_id=YP_006513423.1	transl_table=11
NC_018143.2	RefSeq	gene	124371	125567	.	+	.	ID=gene111	Name=RVBD_0106	Dbxref=GeneID:13316088	gbkey=Gene	locus_tag=RVBD_0106
NC_018143.2	RefSeq	CDS	124371	125567	.	+	0	ID=cds108	Name=YP_006513424.1	Parent=gene111	Dbxref=TubercuList:Rv0106,Genbank:YP_006513424.1,GeneID:13316088	gbkey=CDS	product=hypothetical protein	protein_id=YP_006513424.1	transl_table=11
NC_018143.2	RefSeq	gene	125640	130538	.	-	.	ID=gene112	Name=RVBD_0107c	Dbxref=GeneID:13316089	gbkey=Gene	locus_tag=RVBD_0107c
NC_018143.2	RefSeq	CDS	125640	130538	.	-	0	ID=cds109	Name=YP_006513425.1	Parent=gene112	Dbxref=TubercuList:Rv0107c,Genbank:YP_006513425.1,GeneID:13316089	gbkey=CDS	product=cation-transporter P-type ATPase CtpI	protein_id=YP_006513425.1	transl_table=11
NC_018143.2	RefSeq	gene	130892	131101	.	-	.	ID=gene113	Name=RVBD_0108c	Dbxref=GeneID:13316090	gbkey=Gene	locus_tag=RVBD_0108c
NC_018143.2	RefSeq	CDS	130892	131101	.	-	0	ID=cds110	Name=YP_006513426.1	Parent=gene113	Dbxref=TubercuList:Rv0108c,Genbank:YP_006513426.1,GeneID:13316090	gbkey=CDS	product=hypothetical protein	protein_id=YP_006513426.1	transl_table=11
NC_018143.2	RefSeq	gene	131380	132870	.	+	.	ID=gene114	Name=RVBD_0109	Dbxref=GeneID:13316091	gbkey=Gene	locus_tag=RVBD_0109
NC_018143.2	RefSeq	CDS	131380	132870	.	+	0	ID=cds111	Name=YP_006513427.1	Parent=gene114	Dbxref=TubercuList:Rv0109,Genbank:YP_006513427.1,GeneID:13316091	gbkey=CDS	product=PE-PGRS family protein PE_PGRS1	protein_id=YP_006513427.1	transl_table=11
NC_018143.2	RefSeq	gene	133018	133767	.	+	.	ID=gene115	Name=RVBD_0110	Dbxref=GeneID:13316092	gbkey=Gene	locus_tag=RVBD_0110
NC_018143.2	RefSeq	CDS	133018	133767	.	+	0	ID=cds112	Name=YP_006513428.1	Parent=gene115	Dbxref=TubercuList:Rv0110,Genbank:YP_006513428.1,GeneID:13316092	gbkey=CDS	product=integral membrane protein	protein_id=YP_006513428.1	transl_table=11
NC_018143.2	RefSeq	gene	133948	136005	.	+	.	ID=gene116	Name=RVBD_0111	Dbxref=GeneID:13316093	gbkey=Gene	locus_tag=RVBD_0111
NC_018143.2	RefSeq	CDS	133948	136005	.	+	0	ID=cds113	Name=YP_006513429.1	Parent=gene116	Dbxref=TubercuList:Rv0111,Genbank:YP_006513429.1,GeneID:13316093	gbkey=CDS	product=transmembrane acyltransferase	protein_id=YP_006513429.1	transl_table=11
NC_018143.2	RefSeq	gene	136287	137243	.	+	.	ID=gene117	Name=RVBD_0112	Dbxref=GeneID:13316094	gbkey=Gene	locus_tag=RVBD_0112
NC_018143.2	RefSeq	CDS	136287	137243	.	+	0	ID=cds114	Name=YP_006513430.1	Parent=gene117	Dbxref=TubercuList:Rv0112,Genbank:YP_006513430.1,GeneID:13316094	gbkey=CDS	product=GDP-mannose 4%2C6-dehydratase Gca	protein_id=YP_006513430.1	transl_table=11
NC_018143.2	RefSeq	gene	137317	137907	.	+	.	ID=gene118	Name=RVBD_0113	Dbxref=GeneID:13316095	gbkey=Gene	locus_tag=RVBD_0113
NC_018143.2	RefSeq	CDS	137317	137907	.	+	0	ID=cds115	Name=YP_006513431.1	Parent=gene118	Dbxref=TubercuList:Rv0113,Genbank:YP_006513431.1,GeneID:13316095	gbkey=CDS	product=sedoheptulose-7-phosphate isomerase GmhA	protein_id=YP_006513431.1	transl_table=11
NC_018143.2	RefSeq	gene	137939	138511	.	+	.	ID=gene119	Name=RVBD_0114	Dbxref=GeneID:13316096	gbkey=Gene	locus_tag=RVBD_0114
NC_018143.2	RefSeq	CDS	137939	138511	.	+	0	ID=cds116	Name=YP_006513432.1	Parent=gene119	Dbxref=TubercuList:Rv0114,Genbank:YP_006513432.1,GeneID:13316096	gbkey=CDS	product=d-alpha%2Cbeta-d-heptose-1%2C7-biphosphate phosphatase GmhB	protein_id=YP_006513432.1	transl_table=11
NC_018143.2	RefSeq	gene	138511	139671	.	+	.	ID=gene120	Name=RVBD_0115	Dbxref=GeneID:13316097	gbkey=Gene	locus_tag=RVBD_0115
NC_018143.2	RefSeq	CDS	138511	139671	.	+	0	ID=cds117	Name=YP_006513433.1	Parent=gene120	Dbxref=TubercuList:Rv0115,Genbank:YP_006513433.1,GeneID:13316097	gbkey=CDS	product=d-alpha-d-heptose-7-phosphate kinase HddA	protein_id=YP_006513433.1	transl_table=11
NC_018143.2	RefSeq	gene	140265	141020	.	-	.	ID=gene121	Name=RVBD_0116c	Dbxref=GeneID:13316099	gbkey=Gene	locus_tag=RVBD_0116c
NC_018143.2	RefSeq	CDS	140265	141020	.	-	0	ID=cds118	Name=YP_006513435.1	Parent=gene121	Dbxref=TubercuList:Rv0116c,Genbank:YP_006513435.1,GeneID:13316099	gbkey=CDS	product=l%2Cd-transpeptidase LdtA	protein_id=YP_006513435.1	transl_table=11
NC_018143.2	RefSeq	gene	141198	142142	.	+	.	ID=gene122	Name=RVBD_0117	Dbxref=GeneID:13316100	gbkey=Gene	locus_tag=RVBD_0117
NC_018143.2	RefSeq	CDS	141198	142142	.	+	0	ID=cds119	Name=YP_006513436.1	Parent=gene122	Dbxref=TubercuList:Rv0117,Genbank:YP_006513436.1,GeneID:13316100	gbkey=CDS	product=oxidative stress response regulatory protein OxyS	protein_id=YP_006513436.1	transl_table=11
NC_018143.2	RefSeq	gene	142126	143874	.	-	.	ID=gene123	Name=RVBD_0118c	Dbxref=GeneID:13316101	gbkey=Gene	locus_tag=RVBD_0118c
NC_018143.2	RefSeq	CDS	142126	143874	.	-	0	ID=cds120	Name=YP_006513437.1	Parent=gene123	Dbxref=TubercuList:Rv0118c,Genbank:YP_006513437.1,GeneID:13316101	gbkey=CDS	product=oxalyl-CoA decarboxylase OxcA	protein_id=YP_006513437.1	transl_table=11
NC_018143.2	RefSeq	gene	144047	145624	.	+	.	ID=gene124	Name=RVBD_0119	Dbxref=GeneID:13316102	gbkey=Gene	locus_tag=RVBD_0119
NC_018143.2	RefSeq	CDS	144047	145624	.	+	0	ID=cds121	Name=YP_006513438.1	Parent=gene124	Dbxref=TubercuList:Rv0119,Genbank:YP_006513438.1,GeneID:13316102	gbkey=CDS	product=fatty-acid-CoA ligase FadD7	protein_id=YP_006513438.1	transl_table=11
NC_018143.2	RefSeq	gene	145625	147769	.	-	.	ID=gene125	Name=RVBD_0120c	Dbxref=GeneID:13316103	gbkey=Gene	locus_tag=RVBD_0120c
NC_018143.2	RefSeq	CDS	145625	147769	.	-	0	ID=cds122	Name=YP_006513439.1	Parent=gene125	Dbxref=TubercuList:Rv0120c,Genbank:YP_006513439.1,GeneID:13316103	gbkey=CDS	product=elongation factor G FusA2	protein_id=YP_006513439.1	transl_table=11
NC_018143.2	RefSeq	gene	147906	148340	.	-	.	ID=gene126	Name=RVBD_0121c	Dbxref=GeneID:13316104	gbkey=Gene	locus_tag=RVBD_0121c
NC_018143.2	RefSeq	CDS	147906	148340	.	-	0	ID=cds123	Name=YP_006513440.1	Parent=gene126	Dbxref=TubercuList:Rv0121c,Genbank:YP_006513440.1,GeneID:13316104	gbkey=CDS	product=hypothetical protein	protein_id=YP_006513440.1	transl_table=11
NC_018143.2	RefSeq	gene	148489	148857	.	+	.	ID=gene127	Name=RVBD_0122	Dbxref=GeneID:13316105	gbkey=Gene	locus_tag=RVBD_0122
NC_018143.2	RefSeq	CDS	148489	148857	.	+	0	ID=cds124	Name=YP_006513441.1	Parent=gene127	Dbxref=TubercuList:Rv0122,Genbank:YP_006513441.1,GeneID:13316105	gbkey=CDS	product=hypothetical protein	protein_id=YP_006513441.1	transl_table=11
NC_018143.2	RefSeq	gene	148854	149222	.	+	.	ID=gene128	Name=RVBD_0123	Dbxref=GeneID:13316106	gbkey=Gene	locus_tag=RVBD_0123
NC_018143.2	RefSeq	CDS	148854	149222	.	+	0	ID=cds125	Name=YP_006513442.1	Parent=gene128	Dbxref=TubercuList:Rv0123,Genbank:YP_006513442.1,GeneID:13316106	gbkey=CDS	product=hypothetical protein	protein_id=YP_006513442.1	transl_table=11
NC_018143.2	RefSeq	gene	149531	150994	.	+	.	ID=gene129	Name=RVBD_0124	Dbxref=GeneID:13316107	gbkey=Gene	locus_tag=RVBD_0124
NC_018143.2	RefSeq	CDS	149531	150994	.	+	0	ID=cds126	Name=YP_006513443.1	Parent=gene129	Dbxref=TubercuList:Rv0124,Genbank:YP_006513443.1,GeneID:13316107	gbkey=CDS	product=PE-PGRS family protein PE_PGRS2	protein_id=YP_006513443.1	transl_table=11
NC_018143.2	RefSeq	gene	151146	152213	.	+	.	ID=gene130	Name=RVBD_0125	Dbxref=GeneID:13316108	gbkey=Gene	locus_tag=RVBD_0125
NC_018143.2	RefSeq	CDS	151146	152213	.	+	0	ID=cds127	Name=YP_006513444.1	Parent=gene130	Dbxref=TubercuList:Rv0125,Genbank:YP_006513444.1,GeneID:13316108	gbkey=CDS	product=serine protease PepA	protein_id=YP_006513444.1	transl_table=11
NC_018143.2	RefSeq	gene	152322	154127	.	+	.	ID=gene131	Name=RVBD_0126	Dbxref=GeneID:13316109	gbkey=Gene	locus_tag=RVBD_0126
NC_018143.2	RefSeq	CDS	152322	154127	.	+	0	ID=cds128	Name=YP_006513445.1	Parent=gene131	Dbxref=TubercuList:Rv0126,Genbank:YP_006513445.1,GeneID:13316109	gbkey=CDS	product=trehalose synthase TreS	protein_id=YP_006513445.1	transl_table=11
NC_018143.2	RefSeq	gene	154230	155597	.	+	.	ID=gene132	Name=RVBD_0127	Dbxref=GeneID:13316110	gbkey=Gene	locus_tag=RVBD_0127
NC_018143.2	RefSeq	CDS	154230	155597	.	+	0	ID=cds129	Name=YP_006513446.1	Parent=gene132	Dbxref=TubercuList:Rv0127,Genbank:YP_006513446.1,GeneID:13316110	gbkey=CDS	product=maltokinase Mak	protein_id=YP_006513446.1	transl_table=11
NC_018143.2	RefSeq	gene	155665	156444	.	+	.	ID=gene133	Name=RVBD_0128	Dbxref=GeneID:13316111	gbkey=Gene	locus_tag=RVBD_0128
NC_018143.2	RefSeq	CDS	155665	156444	.	+	0	ID=cds130	Name=YP_006513447.1	Parent=gene133	Dbxref=TubercuList:Rv0128,Genbank:YP_006513447.1,GeneID:13316111	gbkey=CDS	product=transmembrane protein	protein_id=YP_006513447.1	transl_table=11
NC_018143.2	RefSeq	gene	156576	157598	.	-	.	ID=gene134	Name=RVBD_0129c	Dbxref=GeneID:13316112	gbkey=Gene	locus_tag=RVBD_0129c
NC_018143.2	RefSeq	CDS	156576	157598	.	-	0	ID=cds131	Name=YP_006513448.1	Parent=gene134	Dbxref=TubercuList:Rv0129c,Genbank:YP_006513448.1,GeneID:13316112	gbkey=CDS	product=6-O-acylglucoside esterase%2Fglucoside 6-O-acyltransferase FbpC	protein_id=YP_006513448.1	transl_table=11
NC_018143.2	RefSeq	gene	157845	158300	.	+	.	ID=gene135	Name=RVBD_0130	Dbxref=GeneID:13316113	gbkey=Gene	locus_tag=RVBD_0130
NC_018143.2	RefSeq	CDS	157845	158300	.	+	0	ID=cds132	Name=YP_006513449.1	Parent=gene135	Dbxref=TubercuList:Rv0130,Genbank:YP_006513449.1,GeneID:13316113	gbkey=CDS	product=3-hydroxyl-thioester dehydratase	protein_id=YP_006513449.1	transl_table=11
NC_018143.2	RefSeq	gene	158313	159656	.	-	.	ID=gene136	Name=RVBD_0131c	Dbxref=GeneID:13316114	gbkey=Gene	locus_tag=RVBD_0131c
NC_018143.2	RefSeq	CDS	158313	159656	.	-	0	ID=cds133	Name=YP_006513450.1	Parent=gene136	Dbxref=TubercuList:Rv0131c,Genbank:YP_006513450.1,GeneID:13316114	gbkey=CDS	product=acyl-CoA dehydrogenase FadE1	protein_id=YP_006513450.1	transl_table=11
NC_018143.2	RefSeq	gene	159698	160780	.	-	.	ID=gene137	Name=RVBD_0132c	Dbxref=GeneID:13316115	gbkey=Gene	locus_tag=RVBD_0132c
NC_018143.2	RefSeq	CDS	159698	160780	.	-	0	ID=cds134	Name=YP_006513451.1	Parent=gene137	Dbxref=TubercuList:Rv0132c,Genbank:YP_006513451.1,GeneID:13316115	gbkey=CDS	product=F420-dependent glucose-6-phosphate dehydrogenase Fgd2	protein_id=YP_006513451.1	transl_table=11
NC_018143.2	RefSeq	gene	160867	161472	.	+	.	ID=gene138	Name=RVBD_0133	Dbxref=GeneID:13316116	gbkey=Gene	locus_tag=RVBD_0133
NC_018143.2	RefSeq	CDS	160867	161472	.	+	0	ID=cds135	Name=YP_006513452.1	Parent=gene138	Dbxref=TubercuList:Rv0133,Genbank:YP_006513452.1,GeneID:13316116	gbkey=CDS	product=N-acetyltransferase	protein_id=YP_006513452.1	transl_table=11
NC_018143.2	RefSeq	gene	161769	162671	.	+	.	ID=gene139	Name=RVBD_0134	Dbxref=GeneID:13316117	gbkey=Gene	locus_tag=RVBD_0134
NC_018143.2	RefSeq	CDS	161769	162671	.	+	0	ID=cds136	Name=YP_006513453.1	Parent=gene139	Dbxref=TubercuList:Rv0134,Genbank:YP_006513453.1,GeneID:13316117	gbkey=CDS	product=epoxide hydrolase EphF	protein_id=YP_006513453.1	transl_table=11
NC_018143.2	RefSeq	gene	162642	163247	.	-	.	ID=gene140	Name=RVBD_0135c	Dbxref=GeneID:13316118	gbkey=Gene	locus_tag=RVBD_0135c
NC_018143.2	RefSeq	CDS	162642	163247	.	-	0	ID=cds137	Name=YP_006513454.1	Parent=gene140	Dbxref=TubercuList:Rv0135c,Genbank:YP_006513454.1,GeneID:13316118	gbkey=CDS	product=transcriptional regulator	protein_id=YP_006513454.1	transl_table=11
NC_018143.2	RefSeq	gene	163364	164689	.	+	.	ID=gene141	Name=RVBD_0136	Dbxref=GeneID:13316119	gbkey=Gene	locus_tag=RVBD_0136
NC_018143.2	RefSeq	CDS	163364	164689	.	+	0	ID=cds138	Name=YP_006513455.1	Parent=gene141	Dbxref=TubercuList:Rv0136,Genbank:YP_006513455.1,GeneID:13316119	gbkey=CDS	product=cytochrome P450 138 Cyp138	protein_id=YP_006513455.1	transl_table=11
NC_018143.2	RefSeq	gene	164710	165258	.	-	.	ID=gene142	Name=RVBD_0137c	Dbxref=GeneID:13316120	gbkey=Gene	locus_tag=RVBD_0137c
NC_018143.2	RefSeq	CDS	164710	165258	.	-	0	ID=cds139	Name=YP_006513456.1	Parent=gene142	Dbxref=TubercuList:Rv0137c,Genbank:YP_006513456.1,GeneID:13316120	gbkey=CDS	product=peptide methionine sulfoxide reductase MsrA	protein_id=YP_006513456.1	transl_table=11
NC_018143.2	RefSeq	gene	165321	165824	.	+	.	ID=gene143	Name=RVBD_0138	Dbxref=GeneID:13316121	gbkey=Gene	locus_tag=RVBD_0138
NC_018143.2	RefSeq	CDS	165321	165824	.	+	0	ID=cds140	Name=YP_006513457.1	Parent=gene143	Dbxref=TubercuList:Rv0138,Genbank:YP_006513457.1,GeneID:13316121	gbkey=CDS	product=hypothetical protein	protein_id=YP_006513457.1	transl_table=11
NC_018143.2	RefSeq	gene	165825	166847	.	+	.	ID=gene144	Name=RVBD_0139	Dbxref=GeneID:13316122	gbkey=Gene	locus_tag=RVBD_0139
NC_018143.2	RefSeq	CDS	165825	166847	.	+	0	ID=cds141	Name=YP_006513458.1	Parent=gene144	Dbxref=TubercuList:Rv0139,Genbank:YP_006513458.1,GeneID:13316122	gbkey=CDS	product=oxidoreductase	protein_id=YP_006513458.1	transl_table=11
NC_018143.2	RefSeq	gene	166908	167288	.	+	.	ID=gene145	Name=RVBD_0140	Dbxref=GeneID:13316123	gbkey=Gene	locus_tag=RVBD_0140
NC_018143.2	RefSeq	CDS	166908	167288	.	+	0	ID=cds142	Name=YP_006513459.1	Parent=gene145	Dbxref=TubercuList:Rv0140,Genbank:YP_006513459.1,GeneID:13316123	gbkey=CDS	product=hypothetical protein	protein_id=YP_006513459.1	transl_table=11
NC_018143.2	RefSeq	gene	167269	167679	.	-	.	ID=gene146	Name=RVBD_0141c	Dbxref=GeneID:13316124	gbkey=Gene	locus_tag=RVBD_0141c
NC_018143.2	RefSeq	CDS	167269	167679	.	-	0	ID=cds143	Name=YP_006513460.1	Parent=gene146	Dbxref=TubercuList:Rv0141c,Genbank:YP_006513460.1,GeneID:13316124	gbkey=CDS	product=hypothetical protein	protein_id=YP_006513460.1	transl_table=11
NC_018143.2	RefSeq	gene	167709	168635	.	+	.	ID=gene147	Name=RVBD_0142	Dbxref=GeneID:13316125	gbkey=Gene	locus_tag=RVBD_0142
NC_018143.2	RefSeq	CDS	167709	168635	.	+	0	ID=cds144	Name=YP_006513461.1	Parent=gene147	Dbxref=TubercuList:Rv0142,Genbank:YP_006513461.1,GeneID:13316125	gbkey=CDS	product=hypothetical protein	protein_id=YP_006513461.1	transl_table=11
NC_018143.2	RefSeq	gene	168702	170180	.	-	.	ID=gene148	Name=RVBD_0143c	Dbxref=GeneID:13316126	gbkey=Gene	locus_tag=RVBD_0143c
NC_018143.2	RefSeq	CDS	168702	170180	.	-	0	ID=cds145	Name=YP_006513462.1	Parent=gene148	Dbxref=TubercuList:Rv0143c,Genbank:YP_006513462.1,GeneID:13316126	gbkey=CDS	product=CIC family chloride channel protein	protein_id=YP_006513462.1	transl_table=11
NC_018143.2	RefSeq	gene	170282	171124	.	+	.	ID=gene149	Name=RVBD_0144	Dbxref=GeneID:13316127	gbkey=Gene	locus_tag=RVBD_0144
NC_018143.2	RefSeq	CDS	170282	171124	.	+	0	ID=cds146	Name=YP_006513463.1	Parent=gene149	Dbxref=TubercuList:Rv0144,Genbank:YP_006513463.1,GeneID:13316127	gbkey=CDS	product=transcriptional regulator TetR-family	protein_id=YP_006513463.1	transl_table=11
NC_018143.2	RefSeq	gene	171213	172166	.	+	.	ID=gene150	Name=RVBD_0145	Dbxref=GeneID:13316128	gbkey=Gene	locus_tag=RVBD_0145
NC_018143.2	RefSeq	CDS	171213	172166	.	+	0	ID=cds147	Name=YP_006513464.1	Parent=gene150	Dbxref=TubercuList:Rv0145,Genbank:YP_006513464.1,GeneID:13316128	gbkey=CDS	product=s-adenosylmethionine-dependent methyltransferase	protein_id=YP_006513464.1	transl_table=11
NC_018143.2	RefSeq	gene	172209	173141	.	+	.	ID=gene151	Name=RVBD_0146	Dbxref=GeneID:13316129	gbkey=Gene	locus_tag=RVBD_0146
NC_018143.2	RefSeq	CDS	172209	173141	.	+	0	ID=cds148	Name=YP_006513465.1	Parent=gene151	Dbxref=TubercuList:Rv0146,Genbank:YP_006513465.1,GeneID:13316129	gbkey=CDS	product=s-adenosylmethionine-dependent methyltransferase	protein_id=YP_006513465.1	transl_table=11
NC_018143.2	RefSeq	gene	173236	174756	.	+	.	ID=gene152	Name=RVBD_0147	Dbxref=GeneID:13316130	gbkey=Gene	locus_tag=RVBD_0147
NC_018143.2	RefSeq	CDS	173236	174756	.	+	0	ID=cds149	Name=YP_006513466.1	Parent=gene152	Dbxref=TubercuList:Rv0147,Genbank:YP_006513466.1,GeneID:13316130	gbkey=CDS	product=aldehyde dehydrogenase %28NAD%2B%29	protein_id=YP_006513466.1	transl_table=11
NC_018143.2	RefSeq	gene	174831	175691	.	+	.	ID=gene153	Name=RVBD_0148	Dbxref=GeneID:13316131	gbkey=Gene	locus_tag=RVBD_0148
NC_018143.2	RefSeq	CDS	174831	175691	.	+	0	ID=cds150	Name=YP_006513467.1	Parent=gene153	Dbxref=TubercuList:Rv0148,Genbank:YP_006513467.1,GeneID:13316131	gbkey=CDS	product=oxidoreductase	protein_id=YP_006513467.1	transl_table=11
NC_018143.2	RefSeq	gene	175698	176666	.	+	.	ID=gene154	Name=RVBD_0149	Dbxref=GeneID:13316132	gbkey=Gene	locus_tag=RVBD_0149
NC_018143.2	RefSeq	CDS	175698	176666	.	+	0	ID=cds151	Name=YP_006513468.1	Parent=gene154	Dbxref=TubercuList:Rv0149,Genbank:YP_006513468.1,GeneID:13316132	gbkey=CDS	product=NADPH2:quinone reductase	protein_id=YP_006513468.1	transl_table=11
NC_018143.2	RefSeq	gene	176663	176950	.	-	.	ID=gene155	Name=RVBD_0150c	Dbxref=GeneID:13316133	gbkey=Gene	locus_tag=RVBD_0150c
NC_018143.2	RefSeq	CDS	176663	176950	.	-	0	ID=cds152	Name=YP_006513469.1	Parent=gene155	Dbxref=TubercuList:Rv0150c,Genbank:YP_006513469.1,GeneID:13316133	gbkey=CDS	product=hypothetical protein	protein_id=YP_006513469.1	transl_table=11
NC_018143.2	RefSeq	gene	177541	179307	.	-	.	ID=gene156	Name=RVBD_0151c	Dbxref=GeneID:13316134	gbkey=Gene	locus_tag=RVBD_0151c
NC_018143.2	RefSeq	CDS	177541	179307	.	-	0	ID=cds153	Name=YP_006513470.1	Parent=gene156	Dbxref=TubercuList:Rv0151c,Genbank:YP_006513470.1,GeneID:13316134	gbkey=CDS	product=PE family protein PE1	protein_id=YP_006513470.1	transl_table=11
NC_018143.2	RefSeq	gene	179317	180894	.	-	.	ID=gene157	Name=RVBD_0152c	Dbxref=GeneID:13316135	gbkey=Gene	locus_tag=RVBD_0152c
[truncated: 7,906 more rows]
