# Supplementary material for: Biosensor-integrated transposon mutagenesis reveals rv0158 as a coordinator of redox homeostasis in Mycobacterium tuberculosis
Source: eLife. 2023 Aug 29;12:e80218. doi: 10.7554/eLife.80218 (PMC10501769; doi:10.7554/eLife.80218)
Supplement: Supplementary file 2. [file elife-80218-supp2.xlsx]

## Sheet: EdgeR_DeSEQ2
																	NC018143.2
		DeSeq2 analysis											EdgeR analysis
Gene	Gene	log2FC (>1)	pvalue	padj(<0.05)	Tn1	Tn2	OXD1	OXD2	baseMean	lfcSE	stat		log2FC (>1)	logCPM	PValue	FDR(<0.05)		LOCUS TAG	START SITE	END SITE	STRAND	GENE	PRODUCT	COMMENT			FUNCTIONAL CATEGORY			Function
RVBD_0013	Rv0013	-4.52641	0.00199113	0.0136093	0.360577	0.67207	12.6839	11.3411	6.26441	1.46412	-3.09155							Rv0013	14914	15612	+	trpG	Possible anthranilate synthase component II TrpG (glutamine amidotransferase)	Comments=Rv0013, (MTCY10H4.13), len: 232 aa. Possible trpG, anthranilate synthase component II (glutamine amidotransferase). Contains PS00606 Beta-ketoacyl synthases active site	UniProt_AC=Q7DAK6	Is_Pseudogene=No	intermediary metabolism and respiration			Tryptophan biosyntheis
RVBD_0029	Rv0029	-1.82594	0.0008788	0.00717687	20.5529	26.8828	101.471	68.0465	54.2384	0.548873	-3.3267		1.75054	5.76892	0.00555738	0.0203192		Rv0029	32057	33154	+	Rv0029	Conserved hypothetical protein	Comments=Rv0029, (MTCY10H4.29), len: 365 aa. Conserved hypothetical protein, showing some similarity to other proteins from Mycobacterium tuberculosis e.g. C-termil region of Rv2082	UniProt_AC=P71599	Is_Pseudogene=No	conserved hypotheticals
RVBD_0037c	Rv0037c	-1.28129	0.00102567	0.00813733	81.8511	71.8368	240.995	136.093	132.694	0.390236	-3.28339		1.21011	7.48453	0.00503841	0.0186391		Rv0037c	39877	41202	-	Rv0037c	Probable conserved integral membrane protein	Comments=Rv0037c, (MTCY10H4.37c), len: 441 aa. Probable conserved integral membrane protein, member of major facilitator superfamily (MFS) possibly involved in transport of macrolide.	UniProt_AC=P0A5C1	Is_Pseudogene=No	cell wall and cell processes			Efflux pump	doi:10.1007/82_2012_300.NIH-PA Author ManuscriptNIH-PA Author ManuscriptNIH-PA Author Manuscript
RVBD_0041	Rv0041	-2.81933	8.58261e-06	0.000162733	8.11299	12.0973	50.7357	90.7286	40.4186	0.633541	-4.45011		2.74276	4.69532	0.000441545	0.00252297		Rv0041	43562	46471	+	leuS	Probable leucyl-tRNA synthetase LeuS (leucine--tRNA ligase) (LEURS)	Comments=Rv0041, (MTCY21D4.04), len: 969 aa. Probable leucyl-tRNA synthetase, similar to many. Contains PS00178 Aminoacyl-transfer RNA synthetases class-I signature. Belongs to class-I aminoacyl-tRNA synthetase family.	UniProt_AC=P67510	Is_Pseudogene=No	information pathways
RVBD_0043c	Rv0043c	-1.51079	0.00686831	0.0325062	23.3474	27.1068	76.1035	68.0465	48.6511	0.558899	-2.70316							Rv0043c	47366	48100	-	Rv0043c	Probable transcriptional regulatory protein (probably GntR-family)	Comments=Rv0043c, (MTCY21D4.06c), len: 244 aa. Probable transcriptional regulator, GntR family, similar to others.	UniProt_AC=P67737	Is_Pseudogene=No	regulatory proteins
RVBD_0046c	Rv0046c	-5.85794	5.38703e-05	0.00073496	0.180289	0.448047	38.0518	0	9.67003	1.45064	-4.03817							Rv0046c	50021	51124	-	ino1	myo-inositol-1-phosphate synthase Ino1 (inositol 1-phosphate synthetase) (D-glucose 6-phosphate cycloaldolase) (glucose 6-phosphate cyclase) (glucocycloaldolase)	Comments=Rv0046c, (MTCY21D4.09c), len: 367 aa. Ino1 (alternate gene name: tbINO), myo-inositol-1-phosphate synthase (see citations below).	UniProt_AC=P71703	Is_Pseudogene=No	intermediary metabolism and respiration
RVBD_0047c	Rv0047c	-3.87032	1.03878e-10	4.10673e-09	4.41707	6.19798	76.1035	79.3876	41.5265	0.59901	-6.4612		3.79195	4.02427	8.02499e-06	8.24996e-05		Rv0047c	51185	51727	-	Rv0047c	Conserved protein	Comments=Rv0047c, (MTCY21D4.10c), len: 180 aa. Conserved protein, similar to many.	UniProt_AC=P71704	Is_Pseudogene=No	conserved hypotheticals		SUBFAMILY NOT MED (PTHR33169:SF14)	napM
RVBD_0071	Rv0071	-2.11546	0.00110445	0.00859597	11.3582	16.279	63.4196	56.7054	36.9406	0.648423	-3.26247		2.03907	4.95582	0.00795225	0.0270244		Rv0071	79486	80193	+	Rv0071	Possible maturase	Comments=Rv0071, (MTV030.14), len: 235 aa. Possible maturase, similar to many proteins of the group II intron maturase family. Contains 5 VDP repeats at N-terminus, these are also found in two Streptococcus plasmid hypothetical proteins Q52246|X17092 and Q54942|X66468.	UniProt_AC=O53616	Is_Pseudogene=No	information pathways
RVBD_0089	Rv0089	-2.65875	2.89495e-06	6.29097e-05	16.3161	12.396	126.839	56.7054	53.0642	0.568336	-4.67814		2.58624	5.25901	0.000153359	0.00105547		Rv0089	97758	98351	+	Rv0089	Possible methyltransferase/methylase	Comments=Rv0089, (MTCY251.07), len: 197 aa. Possible methyltransferase, showing some weak similarity to others. Also some similarity with many biotin biosynthesis proteins. Belongs to the methyltransferase superfamily.	UniProt_AC=P65346	Is_Pseudogene=No	intermediary metabolism and respiration
RVBD_0090	Rv0090	-5.10335	6.08259e-28	5.42598e-26	4.59736	3.8084	164.891	124.752	74.5122	0.465719	-10.958		5.02595	4.72852	5.54027e-13	2.38815e-11		Rv0090	98480	99250	+	Rv0090	Possible membrane protein	Comments=Rv0090, (MTCY251.08), len: 256 aa. Possible membrane protein. Contains IPR014511 Protein of unknown function DUF2068, transmembrane, subgroup.	UniProt_AC=P64683	Is_Pseudogene=No	cell wall and cell processes
RVBD_0094c	Rv0094c	-1.58989	3.42266e-06	7.17316e-05	94.6516	76.7653	279.046	238.163	172.156	0.342377	-4.64367		1.51971	7.84748	8.94099e-05	0.000661687		Rv0094c	103710	104663	-	Rv0094c	Conserved hypothetical protein	Comments=Rv0094c, (MTCY251.13c), len: 317 aa. Member of 13E12 repeat family, showing some similarity to U15187|MLU15187_7 from Mycobacterium leprae (94 aa), FASTA score: (49.4% identity in 79 aa overlap).	UniProt_AC=Q50655	Is_Pseudogene=No	insertion seqs and phages
RVBD_0096	Rv0096	-6.82801	1.31483e-170	6.53472e-168	7.66227	7.91549	862.507	907.286	446.343	0.245234	-27.8428		6.75218	9.19112	2.96424e-64	7.28315e-62		Rv0096	105324	106715	+	PPE1	PPE family protein PPE1	Comments=Rv0096, (MTCY251.15), len: 463 aa. PPE1, Member of the Mycobacterium tuberculosis PPE family, similar to many. A core mycobacterial gene	UniProt_AC=Q10892	Is_Pseudogene=No	PE/PPE			putative isonitrile lipopeptide (INLP) and thus called INLP synthase (INLPS) complex(https://doi.org/10.1128/AAC.01213-19)
RVBD_0097	Rv0097	-3.929	7.14469e-77	1.24282e-74	73.8282	82.1419	1268.39	1111.43	633.947	0.211725	-18.5571		3.85688	9.82497	4.94785e-31	5.52585e-29		Rv0097	106734	107603	+	Rv0097	Possible oxidoreductase	Comments=Rv0097, (MTCY251.16), len: 289 aa. Possible oxidoreductase, equivalent to NP_302343.1|NC_002677 putative oxidoreductase from Mycobacterium leprae (289 aa). Also highly similar to BAB69377.1|AB070955 putative oxidoreductase from Streptomyces avermitilis (296 aa). Contains PS00077 Cytochrome c oxidase subunit I, copper B binding region signature.	UniProt_AC=P67755	Is_Pseudogene=No	intermediary metabolism and respiration			Zinc homeostasis,putative isonitrile lipopeptide (INLP) and thus called INLP synthase (INLPS) complex(https://doi.org/10.1073/pnas.1705016114, https://doi.org/10.1073/pnas.2110293119)
RVBD_0117	Rv0117	-4.52272	9.9821e-09	3.04629e-07	1.71274	1.94154	50.7357	34.0232	22.1033	0.789163	-5.73103		4.43625	2.39143	0.000247027	0.00156429		Rv0117	141200	142144	+	oxyS	Oxidative stress response regulatory protein OxyS	Comments=Rv0117, (MTV031.11), len: 314 aa. OxyS, oxidative stress response protein regulatory protein, LysR family (see citation below). Similar to many transcription regulators and OxyR, the oxidative stress response protein of many bacteria. Contains LysR family signature at N-terminus. Also contains helix-turn-helix motif at aa 16-37 (Score 1543, +4.44 SD). Belongs to the LysR family of transc…	UniProt_AC=O33175	Is_Pseudogene=No	regulatory proteins
RVBD_0122	Rv0122	-3.7354	2.64896e-07	6.48995e-06	3.78606	5.07786	25.3678	90.7286	31.2401	0.725765	-5.14685		3.65459	3.60475	0.000183387	0.00121451		Rv0122	148491	148859	+	Rv0122	Hypothetical protein	Comments=Rv0122, (MTCI418B.04), len: 122 aa. Hypothetical unknown protein.	UniProt_AC=O07172	Is_Pseudogene=No	conserved hypotheticals
RVBD_0128	Rv0128	-1.81705	0.000444275	0.0042697	25.8714	24.8666	63.4196	113.411	56.8921	0.51734	-3.51228		1.74503	5.8812	0.00500622	0.0185525		Rv0128	155667	156446	+	Rv0128	Probable conserved transmembrane protein	Comments=Rv0128, (MTCI5.02), len: 259 aa. Probable conserved transmembrane protein, with some similarity to Rv3064c and other bacterial proteins e.g. AAK85977.1|AE007957|AGR_C_254p from Agrobacterium tumefaciens (206 aa).	UniProt_AC=P96805	Is_Pseudogene=No	cell wall and cell processes
RVBD_0134	Rv0134	-1.71721	0.00315151	0.0192016	23.077	23.8211	38.0518	113.411	49.5902	0.5816	-2.95256		1.64598	5.70718	0.0147882	0.0450946		Rv0134	161771	162673	+	ephF	Possible epoxide hydrolase EphF (epoxide hydratase) (arene-oxide hydratase)	Comments=Rv0134, (MTCI5.08), len: 300 aa. Possible ephE, epoxide hydrolase (see citation below), similar to others e.g. Q39856 epoxide hydrolase (341 aa), FASTA scores: opt: 369, E(): 4.6e-17, (27.2% identity in 335 aa overlap)	UniProt_AC=P96811	Is_Pseudogene=No	virulence, detoxification, adaptation
RVBD_0155	Rv0155	-4.08479	2.23758e-38	2.59484e-36	27.494	22.925	507.357	351.573	227.337	0.315337	-12.9537		4.01327	7.96779	1.29978e-24	1.03018e-22		Rv0155	183622	184722	+	pntAa	Probable NAD(P) transhydrogenase (subunit alpha) PntAa [first part	Comments=Rv0155, (MTCI5.29), len: 366 aa. Probable pntAa, first part of NAD(P) transhydrogenase subunit alpha, similar to N-terminus of others e.g. PNTA_ECOLI|P07001|P76888|B1603 NAD (P) transhydrogenase subunit alpha from Escherichia coli strain K12 (510 aa), FASTA scores: opt: 921, E(): 0, (42.1% identity in 361 aa overlap)	UniProt_AC=P96832	Is_Pseudogene=No	intermediary metabolism and respiration
RVBD_0156	Rv0156	-2.82762	2.12512e-05	0.000342282	6.94111	8.21419	50.7357	56.7054	30.6491	0.665116	-4.25132		2.75143	4.17439	0.00171096	0.00781379		Rv0156	184723	185055	+	pntAb	Probable NAD(P) transhydrogenase (subunit alpha) PntAb [second part	Comments=Rv0156, (MTCI5.30), len: 110 aa. Probable pntAb, second part of NAD(P) transhydrogenase subunit alpha, integral membrane protein, similar to C-terminus of others e.g. Q59764 nicotinamide nucleotide transhydrogenase subunit PNTAB (139 aa), FASTA scores: opt: 247, E(): 1.9e-11, (45.5% identity in 88 aa overlap).	UniProt_AC=P96833	Is_Pseudogene=No	intermediary metabolism and respiration
RVBD_0157	Rv0157	-2.33344	6.57532e-21	4.39914e-19	113.672	123.213	532.725	657.783	356.848	0.248758	-9.38035		2.26004	8.96412	1.31826e-11	5.06089e-10		Rv0157	185052	186479	+	pntB	Probable NAD(P) transhydrogenase (subunit beta) PntB [integral membrane protein] (pyridine nucleotide transhydrogenase subunit beta) (nicotinamide nucleotide transhydrogenase subunit beta)	Comments=Rv0157, (MTCI5.31), len: 475 aa. Probable pntB, pyridine nucleotide transhydrogenase (nicotinamide nucleotide transhydrogenase) subunit beta, integral membrane protein, similar to others e.g. Q59763 proton-translocating nicotinamide nucleotide transhydrogenase subunit beta from hodospirillum rubrum (464 aa), FASTA scores: opt: 1344, E(): 0, (46.4% identity in 472 aa overlap)	UniProt_AC=P96834	Is_Pseudogene=No	intermediary metabolism and respiration
RVBD_0158	Rv0158	-1.50841	0.00268118	0.0169597	40.2044	73.7037	177.575	147.434	109.729	0.502451	-3.00211		1.42994	7.11585	0.00244219	0.0103814		Rv0158	186785	187429	+	Rv0158	Probable transcriptional regulatory protein (possibly TetR-family)	Comments=Rv0158, (MTV032.01), len: 214 aa. Probable transcriptional regulator, possibly TetR family, showing weak similarity to various transcriptional activators and repressors e.g. P32398|YIXD_BACSU|YHGD hypothetical transcriptional regulatory protein from Bacillus subtilis (191 aa), FASTA scores: opt:172, E(): 2.4e-05, (23.0% identity in 191 aa overlap). Contains helix-turn-helix motif at aa 3…	UniProt_AC=O53641	Is_Pseudogene=No	regulatory proteins
RVBD_0161	Rv0161	-1.92057	0.00109182	0.00853585	21.6346	16.503	88.7875	56.7054	45.9076	0.588097	-3.26573		1.84926	5.42667	0.00812978	0.0275515		Rv0161	190607	191956	+	Rv0161	Possible oxidoreductase	Comments=Rv0161, (MTCI28.01, MTV032.04), len: 449 aa. Possible oxidoreductase, similar to hypothetical proteins and various oxidoreductases e.g. AIP2_YEAST|P46681 actin interacting protein 2 (530 aa), FASTA scores: opt: 356, E (): 0, (33.3% identity in 357 aa overlap)	UniProt_AC=O07406	Is_Pseudogene=No	intermediary metabolism and respiration
RVBD_0166	Rv0166	-1.45672	7.74071e-06	0.000148784	88.6119	103.349	266.362	260.845	179.792	0.325725	-4.47223		1.3837	7.95201	0.000286366	0.00176784		Rv0166	194993	196657	+	fadD5	Probable fatty-acid-CoA ligase FadD5 (fatty-acid-CoA synthetase) (fatty-acid-CoA synthase)	Comments=Rv0166, (MTCI28.06), len: 554 aa. Probable fadD5, fatty-acid-CoA synthetase, similar to many eg LCFA_ECOLI|P29212 long-chain-fatty-acid--CoA ligase (561 aa), FASTA scores: opt: 612, E(): 0, (29.4% identity in 534 aa overlap). Also similar to many other fatty-acid-CoA ligases from Mycobacterium tuberculosis e.g. MTCY07A7.11c FASTA score: (35.3% identity in 487 aa overlap), MTV013_10, MTY2…	UniProt_AC=O07411	Is_Pseudogene=No	lipid metabolism
RVBD_0167	Rv0167	-1.90146	9.80337e-11	3.92022e-09	88.5217	87.3691	291.73	362.915	207.634	0.293891	-6.46995		1.82896	8.1102	7.68066e-07	1.09083e-05		Rv0167	196861	197658	+	yrbE1A	Conserved integral membrane protein YrbE1A	Comments=Rv0167, (MTCI28.07), len: 265 aa. YrbE1A, unknown integral membrane protein, part of mce1 operon and member of YrbE family (see citations below), highly similar to Mycobacterium tuberculosis proteins O07791|Rv0587|MTCY19H5.35|yrbE2A (265 aa)	UniProt_AC=O07412	Is_Pseudogene=No	virulence, detoxification, adaptation
RVBD_0168	Rv0168	-1.7473	7.60012e-05	0.00100155	35.8774	45.9994	126.839	147.434	89.0375	0.441608	-3.95667		1.67325	6.68155	0.00115601	0.00575394		Rv0168	197660	198529	+	yrbE1B	Conserved integral membrane protein YrbE1B	Comments=Rv0168, (MTCI28.08), len: 289 aa. YrbE1B, unknown integral membrane protein, part of mce1 operon and member of YrbE family (see citations below), highly similar to Mycobacterium tuberculosis proteins O07790|Rv0588|MTCY19H5.34|yrbE2B (295 aa)	UniProt_AC=O07413	Is_Pseudogene=No	virulence, detoxification, adaptation
RVBD_0169	Rv0169	-1.20828	4.14014e-06	8.57354e-05	415.565	511.072	887.875	1247.52	765.508	0.262428	-4.60422		1.13461	10.2424	0.000306513	0.00186874		Rv0169	198534	199898	+	mce1A	Mce-family protein Mce1A	Comments=Rv0169, (MTCI28.09), len: 454 aa. Mce1A	UniProt_AC=Q79FZ9	Is_Pseudogene=No	virulence, detoxification, adaptation
RVBD_0171	Rv0171	-1.86961	5.43612e-18	3.31794e-16	322.446	292.574	1243.02	1009.36	716.85	0.216295	-8.64383		1.79947	10.0995	4.89235e-09	1.23923e-07		Rv0171	200932	202479	+	mce1C	Mce-family protein Mce1C	Comments=Rv0171, (MTCI28.11), len: 515 aa. Mce1C	UniProt_AC=O07415	Is_Pseudogene=No	virulence, detoxification, adaptation
RVBD_0172	Rv0172	-1.96876	2.5434e-35	2.60249e-33	955.62	904.382	3779.81	3504.39	2286.05	0.158744	-12.4022		1.89771	11.8361	5.4832e-11	1.9246e-09		Rv0172	202476	204068	+	mce1D	Mce-family protein Mce1D	Comments=Rv0172, (MTCI28.12), len: 530 aa. Mce1D	UniProt_AC=O07416	Is_Pseudogene=No	virulence, detoxification, adaptation
RVBD_0173	Rv0173	-2.31607	1.83981e-17	1.06678e-15	106.731	127.395	659.564	510.349	351.01	0.272367	-8.50349		2.24332	8.93103	3.26645e-11	1.16314e-09		Rv0173	204065	205237	+	lprK	Possible Mce-family lipoprotein LprK (Mce-family lipoprotein Mce1E)	Comments=Rv0173, (MTCI28.13), len: 390 aa. Possible lprK (alternate gene name: mce1E), lipoprotein which belongs to 24-membered Mycobacterium tuberculosis Mce protein family (see citations below), highly similar to Mycobacterium tuberculosis proteins O07785|LPRL|Rv0593|MTCY19H5.29|mce2E (402 aa)	UniProt_AC=O07417	Is_Pseudogene=No	cell wall and cell processes
RVBD_0174	Rv0174	-2.34852	1.79291e-20	1.1551e-18	171.635	214.689	875.191	1088.74	587.565	0.253237	-9.274		2.27456	9.76873	1.74855e-12	7.0696e-11		Rv0174	205231	206778	+	mce1F	Mce-family protein Mce1F	Comments=Rv0174, (MTCI28.14), len: 515 aa. Mce1F	UniProt_AC=O07418	Is_Pseudogene=No	virulence, detoxification, adaptation
RVBD_0176	Rv0176	-3.25036	1.65887e-22	1.20233e-20	36.5986	39.5774	266.362	453.643	199.045	0.333003	-9.76077		3.17734	7.82111	2.0777e-15	1.04182e-13		Rv0176	207452	208420	+	Rv0176	Probable conserved Mce associated transmembrane protein	Comments=Rv0176, (MTCI28.16), len: 322 aa. Probable conserved Mce-associated transmembrane protein. Contains short region of similarity to PRA_MYCLE|P41484 proline-rich antigen (36 kDa antigen) from Mycobacterium leprae (249 aa) (outside the proline-rich region), FASTA scores: opt: 165, E(): 2.9e-05, (40.0% identity in 65 aa overlap). Also similar to mce-associated proteins from Mycobacterium tub…	UniProt_AC=O07420	Is_Pseudogene=No	cell wall and cell processes
RVBD_0178	Rv0178	-4.14409	7.34397e-37	7.98427e-35	16.0457	15.7563	266.362	294.868	148.258	0.326743	-12.683		4.0704	7.03027	1.57365e-19	9.43038e-18		Rv0178	208938	209672	+	Rv0178	Probable conserved Mce associated membrane protein	Comments=Rv0178, (MTCI28.18), len: 244 aa. Probable conserved Mce-associated membrane protein, highly similar in C-terminus to CAC32130.1|AL583926 putative secreted protein from Mycobacterium leprae (184 aa). Also similar to mce-associated proteins from Mycobacterium tuberculosis e.g. Rv1363c, Rv0177, Rv1973, etc. Note that there is a 10 aa overlap with the upstream ORF. A core mycobacterial gene	UniProt_AC=O07422	Is_Pseudogene=No	cell wall and cell processes
RVBD_0180c	Rv0180c	-4.24384	3.79948e-08	1.04908e-06	1.89303	4.40579	63.4196	56.7054	31.606	0.771617	-5.49993		4.1583	3.2267	3.07085e-05	0.000260175		Rv0180c	210892	212250	-	Rv0180c	Probable conserved transmembrane protein	Comments=Rv0180c, (MTCI28.20c), len: 452 aa. Probable conserved transmembrane protein, equivalent to CAC32132.1|AL583926 probable conserved membrane protein from Mycobacterium leprae (465 aa). Shows some similarity with others membrane proteins e.g. AL096849|SCI11_29 from Streptomyces coelicolor (354 aa), FASTA scores: opt: 190, E(): 0.00067, (25.9% identity in 409 aa overlap).	UniProt_AC=O07424	Is_Pseudogene=No	cell wall and cell processes			cell envelope (https://doi.org/10.1371/journal.ppat.1010020)
RVBD_0181c	Rv0181c	-1.00117	0.0115917	0.0468925	73.3775	70.3433	152.207	136.093	108.005	0.396608	-2.52434							Rv0181c	212277	213011	-	Rv0181c	Conserved hypothetical protein	Comments=Rv0181c, (MTCI28.21c), len: 244 aa. Conserved hypothetical protein, highly similar to other hypothetical proteins e.g. YHHW_ECOLI|P46852 hypothetical 26.3 kd protein from Escherichia coli (231 aa), FASTA scores: opt: 479, E(): 1.2e-29, (37.3% identity in 233 aa overlap)	UniProt_AC=P65724	Is_Pseudogene=No	conserved hypotheticals			anti-sigma factor G (rsgA, rv0181c),RsgA is encoded immediately downstream of sigma factor G (sigG)(http://dx.doi.org/10.1128/JB.01537-14); detoxifying enzyme (https://doi.org/10.1016/j.tube.2013.05.005)
RVBD_0186Ac	Rv0186Ac	-3.29258	1.52481e-12	6.88938e-11	11.8991	12.4706	101.471	136.093	65.4835	0.465566	-7.07221		3.21792	5.37528	2.96956e-07	4.80013e-06														copper-binding metallothionein(https://doi.org/10.1038/nchembio.109)
RVBD_0195	Rv0195	-3.07605	2.06195e-10	7.97058e-09	12.0793	13.4414	101.471	113.411	60.1007	0.48391	-6.35665		3.00151	5.30335	3.63539e-06	4.21328e-05		Rv0195	230899	231534	+	Rv0195	Possible two component transcriptional regulatory protein (probably LuxR-family)	Comments=Rv0195, (MTV033.03), len: 211 aa. Possible two-component response regulator, luxR family, similar to many e.g. U00008|ECOHU49_15 regulatory protein narP from Escherichia coli strain K12 (225 aa), FASTA scores: opt: 232, E(): 7.3e-09, (29.2% identity in 219 aa overlap). Start chosen by similarity. Contains probable helix-turn-helix motif at aa 166-187 (Score 1164, +3.15 SD).	UniProt_AC=O53646	Is_Pseudogene=No	regulatory proteins			LuxR family regulator Rv0195
RVBD_0210	Rv0210	-2.23279	9.46628e-05	0.00118465	19.0205	14.1135	76.1035	79.3876	47.1563	0.571941	-3.90388		2.16229	5.31298	0.00163685	0.00760255		Rv0210	250120	251598	+	Rv0210	Hypothetical protein	Comments=Rv0210, (MTCY08D5.05), len: 492 aa. Hypothetical unknown protein. Possibly membrane protein	UniProt_AC=P96392	Is_Pseudogene=No	conserved hypotheticals
RVBD_0221	Rv0221	-1.62318	0.00158137	0.0112969	29.7476	35.8437	63.4196	136.093	66.276	0.513774	-3.15932		1.55041	6.23756	0.00843891	0.0284236		Rv0221	264067	265476	+	Rv0221	Possible triacylglycerol synthase (diacylglycerol acyltransferase)	Comments=Rv0221, (MTCY08D5.16), len: 469 aa. Possible triacylglycerol synthase (See Daniel et al., 2004), similar to other proteins from Mycobacterium tuberculosis e.g. Q50680|Rv2285|MT2343|MTCY339.25c 47.7 kDa protein (445 aa), FASTA scores: opt: 455, E(): 8.1e-23, (26.7% identity in 461 aa overlap)	UniProt_AC=P96403	Is_Pseudogene=No	lipid metabolism
RVBD_0233	Rv0233	-2.80157	3.94534e-09	1.31979e-07	15.5048	15.3829	101.471	113.411	61.4425	0.475934	-5.88647		2.72815	5.50017	1.81889e-05	0.000167379		Rv0233	278585	279529	+	nrdB	Ribonucleoside-diphosphate reductase (beta chain) NrdB (ribonucleotide reductase small chain)	Comments=Rv0233, (MTCY08D5.29), len: 314 aa. nrdB (alternate gene name: rnrS) ribonucleoside-diphosphate reductase, beta chain, similar to others e.g. RIR2_SCHPO|P36603 ribonucleoside-diphosphate reductase (391 aa), FASTA scores: opt: 168, E(): 0.00018, (26.1% identity in 199 aa overlap)	UniProt_AC=P96416	Is_Pseudogene=No	information pathways			probably lipid metabolism (https://doi.org/10.1073/pnas.0812971106)
RVBD_0244c	Rv0244c	-8.95096	0	0	109.706	146.959	60109.1	66957.7	31830.9	0.214221	-41.7837		8.87703	15.6491	2.07489e-107	2.549e-104		Rv0244c	293798	295633	-	fadE5	Probable acyl-CoA dehydrogenase FadE5	Comments=Rv0244c, (MTV034.10c), len: 611 aa. Probable fadE5, acyl-CoA dehydrogenase, equivalent to AL022486|MLCB1883_15 from Mycobacterium leprae (611 aa), FASTA scores: opt: 3598, E(): 0, (89.4% identity in 611 aa overlap). Also highly similar to AL0211|MTV007.14 from Mycobacterium tuberculosis (609 aa), FASTA scores: opt: 2576, E(): 0, (64.6% identity in 611 aa overlap)	UniProt_AC=O53666	Is_Pseudogene=No	lipid metabolism
RVBD_0247c	Rv0247c	-3.21119	6.77219e-07	1.59192e-05	8.83415	16.1297	177.575	56.7054	64.811	0.646403	-4.96779		3.12661	5.34815	3.57441e-06	4.18206e-05		Rv0247c	298116	298862	-	Rv0247c	Probable succinate dehydrogenase [iron-sulfur subunit] (succinic dehydrogenase)	Comments=Rv0247c, (MTV034.13c), len: 248 aa. Probable succinate dehydrogenase, iron-sulfur subunit, highly similar to CAC44313.1|AL596043 putative succinate dehydrogenase iron-sulfur subunit from Streptomyces coelicolor (259 aa)	UniProt_AC=O53669	Is_Pseudogene=No	intermediary metabolism and respiration
RVBD_0248c	Rv0248c	-3.74434	1.22521e-23	9.4722e-22	32.0012	55.1097	520.041	646.442	313.398	0.373627	-10.0216		3.66823	8.62836	6.30397e-23	4.42538e-21		Rv0248c	298863	300803	-	Rv0248c	Probable succinate dehydrogenase [iron-sulfur subunit] (succinic dehydrogenase)	Comments=Rv0248c, (MTV034.14c), len: 646 aa. Probable succinate dehydrogenase, flavoprotein subunit, highly similar to flavoprotein subunit of various succinate dehydrogenases e.g. M88696|RIRSDHA_1 flavoprotein from Rickettsia prowazekii (596 aa), FASTA scores: opt: 651, E(): 0, (34.6 % identity in 598 aa overlap). Also similar to truncated U00022_17 flavoprotein from Mycobacterium leprae (401 aa…	UniProt_AC=O53670	Is_Pseudogene=No	intermediary metabolism and respiration
RVBD_0249c	Rv0249c	-2.18088	0.00119027	0.0091352	14.0625	41.3696	126.839	124.752	76.7558	0.672863	-3.2412		2.09914	6.23818	0.000426802	0.00247323		Rv0249c	300834	301655	-	Rv0249c	Probable succinate dehydrogenase [membrane anchor subunit] (succinic dehydrogenase)	Comments=Rv0249c, (MTV034.15c), len: 273 aa. Probable succinate dehydrogenase, membrane-anchor subunit for succinate dehydrogenase encoded by Rv0247c and Rv0248c. Highly similar to AC44315.1|AL596043 putative integral membrane protein from Streptomyces coelicolor (278 aa). Note that succinate dehydrogenase forms generally part of an enzyme complex containing four subunits: a flavoprotein (Rv0248c…	UniProt_AC=O53671	Is_Pseudogene=No	intermediary metabolism and respiration
RVBD_0260c	Rv0260c	-4.25759	0.00562044	0.0283384	0.270433	0.970768	12.6839	11.3411	6.31655	1.53751	-2.76914							Rv0260c	311514	312659	-	Rv0260c	Possible transcriptional regulatory protein	Comments=Rv0260c, (MTCY0A4.04c), len: 381 aa. Possible two-component response regulator, highly similar to CAB72204.1|AL138851 putative transcriptional regulator from Streptomyces coelicolor (395 aa)	UniProt_AC=P95217	Is_Pseudogene=No	regulatory proteins			interact with DosS;https://doi.org/10.1038/s42003-019-0594-0
RVBD_0270	Rv0270	-6.61444	3.39417e-193	2.36166e-190	3944.27	2843.15	319330	345699	167954	0.223084	-29.65		6.54565	18.0524	4.07771e-73	1.43128e-70		Rv0270	324567	326249	+	fadD2	Probable fatty-acid-CoA ligase FadD2 (fatty-acid-CoA synthetase) (fatty-acid-CoA synthase)	Comments=Rv0270, (MTCY06A4.14), len: 560 aa. Probable fadD2, fatty-acid-CoA synthetase, similar to many e.g. LCFA_ECOLI|P29212 long-chain-fatty-acid--CoA ligase from Escherichia coli (561 aa), FASTA scores: opt: 544, E(): 2.9e-26, (27.7% identity in 535 aa overlap). Also similar to others from Mycobacterium tuberculosis e.g. MTCY493_2, MTCY8D5_9, MTCY6G11_8, etc. Contains PS00455 Putative AMP-bin…	UniProt_AC=P95227	Is_Pseudogene=No	lipid metabolism
RVBD_0294	Rv0294	-1.69485	0.00714783	0.0330243	19.2909	17.9965	88.7875	34.0232	40.0245	0.630084	-2.68988							Rv0294	358171	358956	+	tam	Probable trans-aconitate methyltransferase Tam	Comments=Rv0294, (MTV035.22), len: 261 aa. Probable tam, trans-aconitate methyltransferase, similar to others e.g. P76145|TAM_ECOLI|7465793|B64906|B1519 trans-aconitate methyltransferase from Escherichia coli strain K12 (252 aa), FASTA scores: opt: 649, E(): 0, (39.3 identity in 252 aa overlap). Belongs to the methyltransferase superfamily.	UniProt_AC=P66885	Is_Pseudogene=No	intermediary metabolism and respiration			biotin biogenesis(https://www.pnas.org/cgi/doi/10.1073/pnas.2010189117)
RVBD_0311	Rv0311	-3.08831	5.47281e-06	0.000110057	6.49039	6.27265	76.1035	34.0232	30.7225	0.679377	-4.5458		3.01467	3.96538	0.00123143	0.00601516		Rv0311	379172	380401	+	Rv0311	Unknown protein	Comments=Rv0311, (MTCY63.16), len: 409 aa. Unknown protein. Contains PS00881 Protein splicing sigture.	UniProt_AC=O07238	Is_Pseudogene=No	conserved hypotheticals
RVBD_0319	Rv0319	-4.30271	2.70148e-15	1.38212e-13	4.77765	4.33112	88.7875	90.7286	47.1562	0.544373	-7.90397		4.22479	4.00387	3.27654e-07	5.16054e-06		Rv0319	387148	387816	+	pcp	Probable pyrrolidone-carboxylate peptidase Pcp (5-oxoprolyl-peptidase) (pyroglutamyl-peptidase I) (PGP-I) (pyrase)	Comments=Rv0319, (MTCY63.24), len: 222 aa. Probable pcp, pyrrolidone-carboxylate peptidase, highly similar to others e.g. PCP_PSEFL|P42673 pyrrolidone-carboxylate peptidase from Pseudomonas fluorescens (213 aa), FASTA scores: opt: 478, E(): 7.5e-25, (40.2% identity in 219 aa overlap). Belongs to peptidase family C15 (thiol protease).	UniProt_AC=P0A5R4	Is_Pseudogene=No	intermediary metabolism and respiration
RVBD_0322	Rv0322	-2.15414	0.000990295	0.00795667	16.3161	25.9867	38.0518	147.434	56.9472	0.654103	-3.29327		2.08357	5.73176	0.00184392	0.00832816		Rv0322	389260	390591	+	udgA	Probable UDP-glucose 6-dehydrogenase UdgA (UDP-GLC dehydrogenase) (UDP-GLCDH) (UDPGDH)	Comments=Rv0322, (MTCY63.27), len: 443 aa. Probable udg (alternate gene name: rkpK), UDP-glucose 6-dehydrogenase , highly similar to others e.g. CAC44517.1|AL596138 putative UDP-glucose 6-dehydrogenase from Streptomyces coelicolor (447 aa)	UniProt_AC=O07248	Is_Pseudogene=No	intermediary metabolism and respiration
RVBD_0373c	Rv0373c	-2.15622	8.64607e-05	0.0010978	18.0289	16.8017	63.4196	90.7286	47.2447	0.549251	-3.92575		2.08395	5.37118	0.00228039	0.00984696		Rv0373c	449404	451803	-	Rv0373c	Probable carbon monoxyde dehydrogenase (large chain)	Comments=Rv0373c, (MTV036.08c), len: 799 aa. Probable carbon monoxide dehydrogenase, large chain, highly similar to others e.g. AAD00363.1| U80806|CUTL carbon monoxide dehydrogenase large subunit CutL protein from Hydrogenophaga pseudoflava (803 aa)	UniProt_AC=O53708	Is_Pseudogene=No	intermediary metabolism and respiration
RVBD_0376c	Rv0376c	-1.44366	0.00554359	0.0279915	37.2296	28.8243	88.7875	90.7286	61.3925	0.520495	-2.77362							Rv0376c	453230	454372	-	Rv0376c	Conserved hypothetical protein	Comments=Rv0376c, (MTV036.11c), len: 380 aa. Conserved hypothetical protein, highly similar to T35481|4008539|CAA22508.1|AL034492|SC6C5.10 hypothetical protein from Streptomyces coelicolor (395 aa)	UniProt_AC=O53711	Is_Pseudogene=No	conserved hypotheticals		SUBFAMILY NOT MED (PTHR30388:SF4)
RVBD_0393	Rv0393	-1.62283	0.00719906	0.0332169	31.3702	19.1913	76.1035	79.3876	51.5132	0.603846	-2.68749							Rv0393	472781	474106	+	Rv0393	Conserved 13E12 repeat family protein	Comments=Rv0393, (MTCY04D9.05), len: 441 aa. Member of Mycobacterium tuberculosis 13E12 repeat family of conserved proteins, similar to many e.g. Rv1148c, Rv1945, Rv3467, Rv0336|MTCY279_3 (503 aa), FASTA scores: E(): 0, (61.1% identity in 347 aa overlap).	UniProt_AC=P95201	Is_Pseudogene=No	insertion seqs and phages
RVBD_0400c	Rv0400c	-3.81968	0.0102467	0.0425906	1.26202	0.448047	12.6839	11.3411	6.43377	1.48777	-2.56739							Rv0400c	478566	479753	-	fadE7	Acyl-CoA dehydrogenase FadE7	Comments=Rv0400c, (MTCY04D9.12c), len: 395 aa. Probable fadE7, acyl-CoA dehydrogenase, similar to many e.g. CAC12923.1|AL445403 putative acyl CoA dehydrogenase from Streptomyces coelicolor (397 aa)	UniProt_AC=P95208	Is_Pseudogene=No	lipid metabolism
RVBD_0410c	Rv0410c	-5.04911	0.000687624	0.00598061	0.270433	0.448047	12.6839	11.3411	6.18587	1.48745	-3.39447							Rv0410c	495062	497314	-	pknG	Serine/threonine-protein kinase PknG (protein kinase G) (STPK G)	Comments=Rv0410c, (MTCY22G10.06c), len: 750 aa. PknG, serine/threonine-protein kinase (see citations below), equivalent to PKNG_MYCLE|P57993|13092623|CAC29812.1|AL583918 probable serine/threonine-protein kinase from Mycobacterium leprae (767 aa). Also similar to others e.g. AB76890.1|AL159139 putative serine/threonine protein kinase from Streptomyces coelicolor (774 aa)	UniProt_AC=P65728	Is_Pseudogene=No	regulatory proteins			RHOCS;amino acid metabolism sensor; regulator of c and N metabolism(https://doi.org/10.1371/journal.ppat.1006399,https://doi.org/10.1021/acs.jcim.1c01358,https://doi.org/10.1016/j.jprot.2018.09.013)
RVBD_0413	Rv0413	-2.6907	1.24068e-08	3.68917e-07	22.2657	16.7271	126.839	124.752	72.646	0.472547	-5.69404		2.61994	5.88878	6.23323e-06	6.71713e-05		Rv0413	499713	500366	+	mutT3	Possible mutator protein MutT3 (7,8-dihydro-8-oxoguanine-triphosphatase) (8-oxo-dGTPase) (dGTP pyrophosphohydrolase)	Comments=Rv0413, (MTCY22G10.10), len: 217 aa. Possible mutT3, mutator protein (see citation below), showing some similarity with e.g. MUTT_PROVU|P32090 mutator mutt protein from Proteus vulgaris (112 aa), FASTA scores: opt: 151, E(): 0.0008, (40.7% identity in 59 aa overlap). Seems to belong to the NUDIX hydrolase family.	UniProt_AC=P96259	Is_Pseudogene=No	information pathways			RHOCS;RenU nudix hydrolase
RVBD_0418	Rv0418	-3.22814	8.94587e-05	0.00112763	4.41707	4.40579	12.6839	68.0465	22.3883	0.824023	-3.91754		3.15061	3.39162	0.00319202	0.012857		Rv0418	503496	504998	+	lpqL	Probable lipoprotein aminopeptidase LpqL	Comments=Rv0418, (MTCCY22G10.15), len: 500 aa. Probable lpqL, lipoprotein aminopeptidase, similar to others e.g. B83278|9949035|AAG06327.1|AE004720_3|AE004720|PA2939 probable aminopeptidase from Pseudomonas aeruginosa (536 aa)	UniProt_AC=P96264	Is_Pseudogene=No	cell wall and cell processes
RVBD_0420c	Rv0420c	-4.26408	2.37527e-14	1.132e-12	4.32693	4.40579	88.7875	79.3876	44.2269	0.558969	-7.62849		4.18659	3.8818	8.83188e-07	1.2191e-05		Rv0420c	506561	506971	-	Rv0420c	Possible transmembrane protein	Comments=Rv0420c, (MTCY22G10.17c), len: 136 aa. Possible transmembrane protein	UniProt_AC=P96266	Is_Pseudogene=No	cell wall and cell processes
RVBD_0438c	Rv0438c	-1.23647	0.00247562	0.0161407	87.9809	64.9668	202.943	158.775	128.666	0.408574	-3.02631		1.1666	7.45208	0.00724337	0.0252439		Rv0438c	526143	527360	-	moeA2	Probable molybdopterin biosynthesis protein MoeA2	Comments=Rv0438c, (MTV037.02c), len: 405 aa. Probable moeA2, molybdenum cofactor biosynthesis protein, highly similar to many e.g. Y10817|ANY10817_2 from A. nicotinovorans (429 aa), FASTA scores: opt: 786, E(): 0, (39.2% identity in 398 aa overlap)	UniProt_AC=O53725	Is_Pseudogene=No	intermediary metabolism and respiration
RVBD_0443	Rv0443	-1.52522	0.000498893	0.00468888	44.351	55.9311	177.575	113.411	97.817	0.438113	-3.48135		1.4507	6.90773	0.00305951	0.0124241		Rv0443	532396	532911	+	Rv0443	Conserved protein	Comments=Rv0443, (MTV037.07), len: 171 aa. Conserved protein, highly similar to AL049863|SC5H1_23|T35339 hypothetical protein from Streptomyces coelicolor (171 aa), FASTA scores: opt: 561, E(): 2.3e-32, (49.7% identity in 165 aa overlap)	UniProt_AC=O53728	Is_Pseudogene=No	conserved hypotheticals
RVBD_0477	Rv0477	-2.55266	1.9797e-07	4.91956e-06	18.8402	30.1685	152.207	136.093	84.3272	0.490779	-5.20123		2.47568	6.25086	6.37615e-06	6.81139e-05		Rv0477	566776	567222	+	Rv0477	Possible conserved secreted protein	Comments=Rv0477, (MTCY20G9.03), len: 148 aa. Possible conserved secreted protein, equivalent to CAC31969.1|AL583925 hypothetical protein from Mycobacterium leprae (123 aa). Also similar to G83406|PA1914 conserved hypothetical protein from Pseudomonas aeruginosa (408 aa). Contains possible N-terminal signal sequence. A core mycobacterial gene	UniProt_AC=P64697	Is_Pseudogene=No	cell wall and cell processes
RVBD_0481c	Rv0481c	-2.56962	9.46962e-07	2.16742e-05	14.7837	15.607	114.155	68.0465	53.1481	0.52416	-4.90235		2.49617	5.32384	0.000200447	0.00130291		Rv0481c	569988	570512	-	Rv0481c	Hypothetical protein	Comments=Rv0481c, (MTCY20G9.07c), len: 174 aa. Hypothetical unknown protein.	UniProt_AC=P64701	Is_Pseudogene=No	conserved hypotheticals
RVBD_0482	Rv0482	-3.18214	7.42775e-09	2.3492e-07	9.28487	9.11028	63.4196	102.07	45.9711	0.550453	-5.78096		3.10698	4.70423	2.36789e-05	0.000207043		Rv0482	570539	571648	+	murB	Probable UDP-N-acetylenolpyruvoylglucosamine reductase MurB (UDP-N-acetylmuramate dehydrogenase)	Comments=Rv0482, (MTCY20G9.08), len: 369 aa. Probable murB, UDP-N-acetylenolpyruvoylglucosamine reductase (see citation below), equivalent to CAC31964.1|AL583925 UDP-N-acetylenolpyruvoylglucosamine reductase from Mycobacterium leprae (367 aa). Also highly similar to others e.g. MURB_ECOLI|P08373 UDP-N-acetylenolpyruvoylglucosamine reductase from Escherichia coli (342 aa), FASTA scores: opt: 292, …	UniProt_AC=P65460	Is_Pseudogene=No	cell wall and cell processes
RVBD_0487	Rv0487	-1.95041	3.24969e-09	1.09764e-07	65.8054	61.0837	228.311	260.845	154.011	0.329546	-5.91846		1.87874	7.58146	3.61153e-06	4.20547e-05		Rv0487	576787	577338	+	Rv0487	Conserved hypothetical protein	Comments=Rv0487, (MTCY20G9.13), len: 183 aa. Conserved hypothetical protein, highly similar to P54139|Y487_MYCLE|U00018_38|ML2442 hypothetical 20.8 KDA protein from Mycobacterium leprae (184 aa), FASTA scores: opt: 760, E(): 2.4 e-34, (73.0% identity in 159 aa overlap). Also highly similar to CAC04041.1|AL391406 conserved hypothetical protein from Streptomyces coelicolor (168 aa).	UniProt_AC=P64709	Is_Pseudogene=No	conserved hypotheticals
RVBD_0498	Rv0498	-1.82174	0.000716841	0.00612137	40.7452	26.4347	76.1035	158.775	75.5147	0.538488	-3.38306		1.75571	6.37332	0.00223958	0.00970486		Rv0498	588325	589167	+	Rv0498	Conserved hypothetical protein	Comments=Rv0498, (MTCY20G9.24), len: 280 aa. Conserved hypothetical protein, highly similar to P54581|Y498_MYCLE|ML2432 hypothetical 30.5 KDA protein from Mycobacterium leprae (280 aa)	UniProt_AC=P64717	Is_Pseudogene=No	conserved hypotheticals		SUBFAMILY NOT MED (PTHR12110:SF21)
RVBD_0508	Rv0508	-3.15037	2.17038e-10	8.1716e-09	12.2596	17.5485	164.891	102.07	74.1922	0.496217	-6.34877		3.07376	5.69279	4.05734e-07	6.26974e-06		Rv0508	600098	600391	+	Rv0508	Conserved hypothetical protein	Comments=Rv0508, (MTCY20G9.35), len: 97 aa. Conserved hypothetical protein, showing similarity with T36269|5123666|CAB45355.1|AL079345 probable redoxin from Streptomyces coelicolor (101 aa), FASTA scores: opt: 160, E(): 3.4e-05, (33.3% identity in 75 aa overlap)	UniProt_AC=P64727	Is_Pseudogene=No	conserved hypotheticals			Putative Mrx1 like protein
RVBD_0524	Rv0524	-5.35823	1.77376e-05	0.000299559	0.180289	0.970768	25.3678	22.6822	12.3003	1.24853	-4.29162		5.21841	1.07265	0.0016085	0.00751348		Rv0524	614835	616223	+	hemL	Probable glutamate-1-semialdehyde 2,1-aminomutase HemL (GSA) (glutamate-1-semialdehyde aminotransferase) (GSA-at)	Comments=Rv0524, (MTCY25D10.03), len: 462 aa. Probable hemL, glutamate-1-semialdehyde 2,1-aminomutase, equivalent to P46716|GSA_MYCLE glutamate-1-semialdehyde 2,1-aminomutase from Mycobacterium leprae (446 aa), FASTA scores: opt: 1532, E(): 0, (82.6% identity in 460 aa overlap). Also highly similar to others e.g. Q9F2S0|GSA_STRCO from Streptomyces coelicolor (438 aa)	UniProt_AC=P63506	Is_Pseudogene=No	intermediary metabolism and respiration
RVBD_0525	Rv0525	-2.92242	0.00978129	0.0412474	2.07332	2.68828	25.3678	11.3411	10.3676	1.1312	-2.58347							Rv0525	616223	616831	+	Rv0525	Conserved protein	Comments=Rv0525, (MTCY25D10.04), len: 202 aa. Conserved protein, equivalent to Q49821|B2168_C3_276|S72912 hypothetical protein from Mycobacterium leprae (202 aa), FASTA scores: opt: 1151, E(): 0, (82.5% identity in 200 aa overlap). Also highly similar to CAC08377.1|AL392176 putative phosphoglycerate mutase from Streptomyces coelicolor (233 aa)	UniProt_AC=O06391	Is_Pseudogene=No	conserved hypotheticals			putative cytochrome c biogenesis protein (https://doi.org/10.1016/j.femsre.2004.06.002)
RVBD_0526	Rv0526	-3.80049	0.00102098	0.00813611	1.17188	1.41881	25.3678	11.3411	9.8249	1.15703	-3.28468							Rv0526	616846	617496	+	Rv0526	Possible thioredoxin protein (thiol-disulfide interchange protein)	Comments=Rv0526, (MTCY25D10.05), len: 216 aa. Possible thioredoxin protein (thiol-disulfide interchange protein) , equivalent to Q49816|U2168C|S72901 hypothetical protein from Mycobacterium leprae (216 aa), FASTA scores: opt: 1144, E(): 0, (78.5% identity in 214 aa overlap). C-terminus shows some similarity to C-terminus of thioredoxins e.g. RESA_BACSU|P35160 resa protein from Bacillus subtilis (…	UniProt_AC=O06392	Is_Pseudogene=No	intermediary metabolism and respiration
RVBD_0544c	Rv0544c	-4.22775	7.74645e-09	2.42792e-07	6.3101	3.13633	38.0518	136.093	45.8978	0.732219	-5.77388		4.15708	4.03427	2.23578e-06	2.76046e-05		Rv0544c	635935	636213	-	Rv0544c	Possible conserved transmembrane protein	Comments=Rv0544c, (MTCY25D10.23c), len: 92 aa. Possible conserved transmembrane protein, equivalent to NP_302470.1|NC_002677 possible membrane protein from Mycobacterium leprae (96 aa)	UniProt_AC=O06410	Is_Pseudogene=No	cell wall and cell processes
RVBD_0562	Rv0562	-3.68756	0.000238599	0.00255411	1.6226	2.09088	25.3678	22.6822	12.9409	1.00364	-3.6742		3.59937	2.17346	0.0142548	0.0437801		Rv0562	652771	653778	+	grcC1	Probable polyprenyl-diphosphate synthase GrcC1 (polyprenyl pyrophosphate synthetase)	Comments=Rv0562, (MTCY25D10.41), len: 335 aa. Probable grcC1, polyprenyl diphosphate synthetase, equivalent to NP_302483.1|NC_002677 polyprenyl diphosphate synthase component from Mycobacterium leprae (330 aa). Also similar to others (generally hepta or hexaprenyl) e.g. GRC3_BACSU|P31114 probable heptaprenyl diphosphate syntetase (348 aa), FASTA scores: opt: 599, E(): 4e-31, (33.2% identity in 30…	UniProt_AC=O06428	Is_Pseudogene=No	intermediary metabolism and respiration			isoprenoid biosynthesis leading to menaquinone biogenesis (doi:10.1111/j.1365-2958.2009.06625.x)
RVBD_0567	Rv0567	-1.69691	8.60676e-06	0.000162733	50.9316	55.9311	152.207	192.798	112.967	0.38137	-4.44951		1.62409	7.11371	0.000322553	0.00194243		Rv0567	658321	659340	+	Rv0567	Probable methyltransferase/methylase	Comments=Rv0567, (MTV039.05), len: 339 aa. Probable methyltransferase, similar to several e.g. P39896|TCMO_STRGA tetracenomycin polyketide synthesis 8-O-methyltransferase from Streptomyces glaucescens (339 aa), FASTA scores: opt: 685, E(): 0, (35.8% identity in 335 aa overlap)	UniProt_AC=O53764	Is_Pseudogene=No	intermediary metabolism and respiration
RVBD_0614	Rv0614	-1.88066	0.0023147	0.015368	26.6827	15.7563	88.7875	68.0465	49.8182	0.617303	-3.04657		1.81162	5.59255	0.00702028	0.0247472		Rv0614	709356	710348	+	Rv0614	Conserved hypothetical protein	Comments=Rv0614, (MTCY19H5.07c), len: 330 aa. Conserved hypothetical protein, similar in part to Mycobacterium tuberculosis hypothetical proteins e.g. YY16_MYCTU|Q10685|Rv2077c|MT2137|MTCY49.16c conserved hypothetical protein (323 aa), FASTA scores: opt: 200, E(): 0.00016, (28.3% identity in 269 aa overlap)	UniProt_AC=O07763	Is_Pseudogene=No	conserved hypotheticals
RVBD_0632c	Rv0632c	-2.38077	7.01507e-15	3.43738e-13	64.7236	57.2753	329.782	306.209	189.498	0.305846	-7.78421		2.30975	7.85514	1.28195e-09	3.62041e-08		Rv0632c	728583	729278	-	echA3	Probable enoyl-CoA hydratase EchA3 (enoyl hydrase) (unsaturated acyl-CoA hydratase) (crotonase)	Comments=Rv0632c, (MTCY20H10.13c), len: 231 aa. Probable echA3, enoyl-CoA hydratase, almost identical to the MTU88877_1 enoyl-CoA hydratase of Mycobacterium tuberculosis field isolate NTI64719, FASTA score: (92.4% identity in 184 aa overlap). Also similar to others e.g. P24162|ECHH_RHOCA enoyl-CoA hydratase from Rhodobacter capsulatus (Rhodopseudomonas capsulata) (257 aa), FASTA scores: opt: 206,…	UniProt_AC=P96907	Is_Pseudogene=No	lipid metabolism
RVBD_0637	Rv0637	-3.87351	1.68659e-05	0.000286914	1.71274	3.211	50.7357	22.6822	19.5854	0.900232	-4.30279		3.7858	2.64885	0.00278261	0.0115099		Rv0637	732825	733325	+	hadC	(3R)-hydroxyacyl-ACP dehydratase subunit HadC	Comments=Rv0637, (MTCY20H10.18), len: 166 aa. HadC, (3R)-hydroxyacyl-ACP dehydratase subunit, equivalent to NP_302285.1|NC_002677|YV31_MYCLE|P54879 conserved hypothetical protein from Mycobacterium leprae (166 aa), FASTA scores: opt: 352, E(): 4e-19, (39.2% identity in 148 aa overlap)	UniProt_AC=P96928	Is_Pseudogene=No	intermediary metabolism and respiration			FAS II pathway
RVBD_0684	Rv0684	-5.8536	0.000432118	0.00417594	0.180289	0.224023	0	22.6822	5.77162	1.66312	-3.51965							Rv0684	782485	784590	+	fusA1	Probable elongation factor G FusA1 (EF-G)	Comments=Rv0684, (MTV040.12, MTCY210.01), len: 701 aa. Probable fusA1, elongation factor G, equivalent to P30767|EFG_MYCLE|S31150 translation elongation factor EF-G from Mycobacterium leprae (701 aa), FASTA scores: opt: 2521, E(): 0, (88.2% identity in 432 aa overlap). Also highly similar to others e.g. CAB81852.1|AL161691 elongation factor G from Streptomyces coelicolor (708 aa)	UniProt_AC=P0A556	Is_Pseudogene=No	information pathways			Translation
RVBD_0688	Rv0688	-2.00094	0.00115303	0.00891423	15.595	14.2628	50.7357	68.0465	37.16	0.615627	-3.25025		1.9288	5.04307	0.00914426	0.0303614		Rv0688	787940	789160	+	Rv0688	Putative ferredoxin reductase	Comments=Rv0688, (MTCY210.05), len: 406 aa. Putative ferredoxin reductase, highly similar to others e.g. BAB55881.1|AB054975 ferredoxin reductase from Terrabacter sp. DBF63 (410 aa)	UniProt_AC=P95034	Is_Pseudogene=No	intermediary metabolism and respiration			fdrA
RVBD_0770	Rv0770	-3.66616	6.96833e-08	1.82277e-06	3.87621	6.422	50.7357	79.3876	35.1054	0.679927	-5.39199		3.58566	3.85031	7.20212e-05	0.000551265		Rv0770	863256	864143	+	Rv0770	Probable dehydrogenase/reductase	Comments=Rv0770, (MTCY369.15), len: 295 aa. Probable dehydrogenase/reductase, 3-hydroxyisobutyrate dehydrogenase family, possibly 3-hydroxyisobutyrate dehydrogenase or 2-hydroxy-3-oxopropionate reductase, similar to others e.g. P23523|GARR_ECOLI 2-hydroxy-3-oxopropionate reductase (tartronate semialdehyde reductase) (TSAR) from Escherichia coli strain K12 (294 aa), FASTA scores: opt: 469, E(): 6.…	UniProt_AC=P71825	Is_Pseudogene=No	intermediary metabolism and respiration
RVBD_0801	Rv0801	-3.02786	5.62893e-05	0.000759033	4.77765	5.52591	50.7357	34.0232	23.7656	0.751731	-4.02785		2.951	3.58252	0.00462691	0.0173827		Rv0801	894631	894978	+	Rv0801	Conserved protein	Comments=Rv0801, (MTCY07H7A.08c), len: 115 aa. Conserved protein, similar to many hypothetical proteins from Streptomyces sp. e.g. SCD840A.20|AB81865.1|AL161691 hypothetical protein from Streptomyces coelicolor (145 aa)	UniProt_AC=O06633	Is_Pseudogene=No	conserved hypotheticals		SUBFAMILY NOT MED (PTHR35908:SF1)
RVBD_0802c	Rv0802c	-3.69138	4.33831e-56	6.28874e-54	87.6203	75.8692	938.61	1168.13	567.558	0.233942	-15.779		3.61964	9.65478	3.20462e-27	2.91621e-25		Rv0802c	894972	895628	-	Rv0802c	Possible succinyltransferase in the GCN5-related N-acetyltransferase family	Comments=Rv0802c, (MTCY07H7A.07c), len: 218 aa. Possible succinyltransferase in the GNAT (Gcn5-related N-acetyltransferase) family (See Vetting et al., 2008). Shows partial similarity with many acetyltransferases and hypothetical proteins e.g. P96579|BSUB0003_68 probable acetyltransferase from Bacillus subtilis (183 aa), FASTA scores: E(): 0.0044, (26.4% identity in 110 aa overlap).	UniProt_AC=O06632	Is_Pseudogene=No	intermediary metabolism and respiration			Rv0802c can bring about succinylation as well as acetylation of MtHU and their modifications modulate the DNA-binding properties of MtHU(https://doi.org/10.1099/mic.0.001058)
RVBD_0808	Rv0808	-3.06676	0.00165347	0.0116446	2.88462	2.83763	25.3678	22.6822	13.4431	0.974718	-3.14631							Rv0808	902111	903694	+	purF	Amidophosphoribosyltransferase PurF (glutamine phosphoribosylpyrophosphate amidotransferase) (ATASE) (gpatase)	Comments=Rv0808, (MTCY07H7A.01c), len: 527 aa. PurF, amidophosphoribosyltransferase, equivalent to MLCB5_32|Q50028|PURF from Mycobacterium leprae (556 aa), FASTA scores: (91.3% identity in 518 aa overlap)	UniProt_AC=P65829	Is_Pseudogene=No	intermediary metabolism and respiration			Involved in de novo purine biosynthesis
RVBD_0810c	Rv0810c	-5.53785	1.90346e-08	5.51845e-07	0.540866	0.746744	38.0518	22.6822	15.5054	0.985286	-5.62055		5.42046	1.24566	0.000433362	0.00249912		Rv0810c	904905	905087	-	Rv0810c	Conserved hypothetical protein	Comments=Rv0810c, (MTV043.02c), len: 60 aa. Conserved hypothetical protein, with its N-terminus highly similar to NP_302445.1|NC_002677 conserved hypothetical protein from Mycobacterium leprae (62 aa)	UniProt_AC=O53824	Is_Pseudogene=No	conserved hypotheticals
RVBD_0816c	Rv0816c	-5.85171	2.11301e-10	8.07819e-09	0.450722	0.970768	25.3678	56.7054	20.8737	0.921109	-6.35289		5.73771	1.53785	3.8596e-05	0.000318222		Rv0816c	909611	910033	-	thiX	Probable thioredoxin ThiX	Comments=Rv0816c, (MTV043.08c), len: 140 aa. Probable thiX, thioredoxin, equivalent to ThiX|U15182|MLU15182_21 thioredoxin from Mycobacterium leprae (172 aa), FASTA scores: opt: 556, E(): 8.8e-31, (63.8% identity in 141 aa overlap)	UniProt_AC=O53828	Is_Pseudogene=No	intermediary metabolism and respiration			thioredoxin superfamily protein
RVBD_0826	Rv0826	-1.94697	9.09957e-08	2.34499e-06	50.9316	48.6877	215.627	170.116	121.341	0.364338	-5.34384		1.87546	7.14977	2.36338e-05	0.000207043		Rv0826	919634	920689	+	Rv0826	Conserved hypothetical protein	Comments=Rv0826, (MTV043.18), len: 351 aa. Conserved hypothetical protein, similar to CAB94053.1|AL358672|SC7A12.06 hypothetical protein from Streptomyces coelicolor (300 aa)	UniProt_AC=O53837	Is_Pseudogene=No	conserved hypotheticals		SUBFAMILY NOT MED (PTHR36151:SF3)
RVBD_0844c	Rv0844c	-2.29588	0.00168583	0.0117535	8.38342	8.73691	50.7357	34.0232	25.4698	0.731025	-3.14063							Rv0844c	940456	941106	-	narL	Possible nitrate/nitrite response transcriptional regulatory protein NarL	Comments=Rv0844c, (MTV043.37c), len: 216 aa. Possible narL, nitrate/nitrite response regulator protein, similar to many e.g. CAB44989.1|AJ131854 NarL protein from Pseudomonas stutzeri (218 aa)	UniProt_AC=O53856	Is_Pseudogene=No	regulatory proteins			Nitrate sensing and metabolism regulation with dosR( DOI 10.1074/jbc.M114.591800)
RVBD_0848	Rv0848	-1.71062	0.000713294	0.00611986	26.5926	28.1523	76.1035	102.07	58.2295	0.50544	-3.38442		1.63786	5.96529	0.00773106	0.0265667		Rv0848	944938	946056	+	cysK2	Possible cysteine synthase a CysK2 (O-acetylserine sulfhydrylase) (O-acetylserine (thiol)-lyase) (CSASE)	Comments=Rv0848, (MTV043.41), len: 372 aa. Possible cysK2, cysteine synthase A, but could be also a cysteine synthase B cysM2-product, similar to many e.g. NP_109408.1|NC_002682 cysteine synthase from Mesorhizobium loti (357 aa)	UniProt_AC=Q79FV4	Is_Pseudogene=No	intermediary metabolism and respiration
RVBD_0849	Rv0849	-1.81765	0.0123292	0.0491332	10.9976	12.844	50.7357	34.0232	27.1501	0.726309	-2.50258							Rv0849	946056	947315	+	Rv0849	Probable conserved integral membrane transport protein	Comments=Rv0849, (MTV043.42), len: 419 aa. Probable conserved integral membrane transport protein, possibly member of major facilitator superfamily (MFS) involved in transport of drug, showing similarity with others e.g. T35055 probable transport system permease protein from Streptomyces coelicolor (436 aa)	UniProt_AC=O53861	Is_Pseudogene=No	cell wall and cell processes
RVBD_0854	Rv0854	-2.07412	7.27814e-07	1.68804e-05	32.3618	33.1554	152.207	124.752	85.6191	0.418693	-4.95379		2.00197	6.47329	0.000144848	0.00101106		Rv0854	951183	951626	+	Rv0854	Conserved protein	Comments=Rv0854, (MTV043.47), len: 147 aa. Conserved protein, similar to several hypothetical protein from Mycobacterium leprae e.g. NP_301674.1|NC_002677 (144 aa)	UniProt_AC=O53866	Is_Pseudogene=No	conserved hypotheticals		SUBFAMILY NOT MED (PTHR39683:SF4)
RVBD_0868c	Rv0868c	-1.93509	0.000150449	0.00175055	45.2525	27.1815	164.891	113.411	87.6839	0.510534	-3.79033		1.86576	6.56472	0.000434321	0.00249912		Rv0868c	965983	966261	-	moaD2	Probable molybdenum cofactor biosynthesis protein D 2 MoaD2 (molybdopterin converting factor small subunit) (molybdopterin [MPT] converting factor, subunit 1)	Comments=Rv0868c, (MTV043.61c), len: 92 aa. Probable moaD2, molybdenum cofactor biosynthesis protein (molybdopterin converting factor (subunit 1)), similar to CAB88494.1|AL353816 putative molybdopterin converting factor from Streptomyces coelicolor (84 aa)	UniProt_AC=O53880	Is_Pseudogene=No	intermediary metabolism and respiration
RVBD_0875c	Rv0875c	-3.79902	2.93844e-05	0.000448369	1.89303	2.38958	25.3678	34.0232	15.9184	0.909251	-4.17819		3.7133	2.40923	0.00443724	0.0167728		Rv0875c	973806	974294	-	Rv0875c	Possible conserved exported protein	Comments=Rv0875c, (MTCY31.03c), len: 162 aa. Possible conserved exported protein, equivalent to MLCB57_11|O33056 possible exported protein from Mycobacterium leprae (162 aa), FASTA scores: opt: 789, E(): 0, (71.4% identity in 161 aa overlap). A core mycobacterial gene	UniProt_AC=P64731	Is_Pseudogene=No	cell wall and cell processes			D binding protein(PC00009);isomerase(PC00135)
RVBD_0877	Rv0877	-3.25776	9.83309e-44	1.26701e-41	96.4544	84.6061	786.403	941.31	477.193	0.234904	-13.8685		3.18597	9.38402	6.09601e-22	4.04808e-20		Rv0877	976075	976863	+	Rv0877	Conserved hypothetical protein	Comments=Rv0877, (MTCY31.05), len: 262 aa. Conserved hypothetical protein, equivalent to MLCB57_13|O33058 conserved hypothetical protein from Mycobacterium leprae (269 aa), FASTA scores: E(): 0, (80.5% identity in 257 aa overlap). Also highly similar (except in C-terminus) to SCD12A.13|CAB93404.1|AL357524 hypothetical protein from Streptomyces coelicolor (308 aa).	UniProt_AC=P64733	Is_Pseudogene=No	conserved hypotheticals
RVBD_0896	Rv0896	-3.72077	0.0126077	0.0497895	0.811299	0.970768	0	22.6822	6.11606	1.49149	-2.49466							Rv0896	999472	1000767	+	gltA2	Probable citrate synthase I GltA2	Comments=Rv0896, (MTCY31.24), len: 431 aa. Probable gltA2, citrate synthase 1, highly similar to O33066|NP_302405.1|NC_002677 citrate synthase 1 from Mycobacterium leprae (431 aa), FASTA scores: E(): 0, (91.0 identity in 431 aa overlap)	UniProt_AC=Q10530	Is_Pseudogene=No	intermediary metabolism and respiration
RVBD_0917	Rv0917	-1.36921	0.00429689	0.0236272	40.0241	47.4929	76.1035	147.434	77.7637	0.479498	-2.8555		1.29628	6.60609	0.0167051	0.0497508		Rv0917	1022087	1023868	+	betP	Possible glycine betaine transport integral membrane protein BetP	Comments=Rv0917, (MTCY21C12.11), len: 593 aa. Possible betP, glycine betaine transporter, integral membrane protein, highly similar to many transporters, mainly glycine betaine transporters, e.g. P54582|BETP_CORGL glycine betaine transporter from Corynebacterium glutamicum (Brevibacterium flavum) (595 aa), FASTA scores: opt: 1367, E(): 0, (42.7% identity in 504 aa overlap)	UniProt_AC=P63695	Is_Pseudogene=No	cell wall and cell processes
RVBD_0932c	Rv0932c	-1.88234	0.000787524	0.00658605	21.0938	37.4119	114.155	102.07	68.6827	0.560698	-3.35714		1.80453	6.16457	0.00189885	0.00851363		Rv0932c	1039936	1041048	-	pstS2	Periplasmic phosphate-binding lipoprotein PstS2 (PBP-2) (PstS2)	Comments=Rv0932c, (MTCY08D9.07), len: 370 aa. PstS2, phosphate-binding lipoprotein component of inorganic phosphate transport system (see citations below), highly similar to AAF74819.1|AF137360_1|AF137360 periplasmic phosphate permease from Mycobacterium avium (369 aa)	UniProt_AC=O05870	Is_Pseudogene=No	cell wall and cell processes			Phosphate uptake; phosphate binding protein(doi:10.1128/IAI.73.3.1898–1902.2005)
RVBD_0934	Rv0934	-4.2964	7.94305e-36	8.3739e-34	15.8654	22.477	380.518	374.256	198.279	0.343848	-12.4951		4.22048	7.67127	3.64239e-25	2.98312e-23		Rv0934	1042115	1043239	+	pstS1	Periplasmic phosphate-binding lipoprotein PstS1 (PBP-1) (PstS1)	Comments=Rv0934, (MTCY08D9.05c), len: 374 aa. PstS1 (previously known as phoS1 or phoS), phosphate-binding lipoprotein component of inorganic phosphate transport system (see citations below), highly similar to Rv0932c|MTCY08D9.07|pstS2 phosphate-binding periplasmic lipoprotein from Mycobacterium tuberculosis (370 aa), FASTA scores: opt: 460, E(): 5.9e-19, (31.2% identity in 375 aa overlap)	UniProt_AC=P15712	Is_Pseudogene=No	cell wall and cell processes			Phosphate uptake; phosphate binding protein(doi:10.1128/IAI.73.3.1898–1902.2005)
RVBD_0942	Rv0942	-3.05129	1.30256e-05	0.000231204	5.58895	5.97395	50.7357	45.3643	26.9157	0.699889	-4.35967		2.97505	3.78432	0.00210895	0.00925301		Rv0942	1052360	1052638	+	Rv0942	Hypothetical protein	Comments=Rv0942, (MTCY10D7.32c), len: 92 aa. Hypothetical unknown protein.	UniProt_AC=P64763	Is_Pseudogene=No	conserved hypotheticals
RVBD_0963c	Rv0963c	-4.47574	3.79097e-46	5.27551e-44	13.9724	15.0842	329.782	317.55	169.097	0.313829	-14.2617		4.40184	7.28966	4.2077e-24	3.13282e-22		Rv0963c	1075297	1076097	-	Rv0963c	Conserved hypothetical protein	Comments=Rv0963c, (MTCCY10D7.11), len: 266 aa. Conserved hypothetical protein, similar in part to other conserved hypothetical proteins from Mycobacterium tuberculosis e.g. Rv2797c|MTCY16B7.46 (562 aa), FASTA scores: E(): 1.2e-23, (39.0% identity in 254 aa overlap)	UniProt_AC=P64777	Is_Pseudogene=No	conserved hypotheticals
RVBD_0973c	Rv0973c	-2.68536	0.00952115	0.0403952	4.77765	2.76295	38.0518	11.3411	14.2334	1.03572	-2.59275							Rv0973c	1083747	1085750	-	accA2	Probable acetyl-/propionyl-coenzyme A carboxylase alpha chain (alpha subunit) AccA2: biotin carboxylase + biotin carboxyl carrier protein (BCCP)	Comments=Rv0973c, (MTV044.01c, MTCY10D7.01), len: 667 aa. Probable accA2 (alternate gene name: bccA), acetyl-/propionyl-coenzyme A carboxylase (alpha subunit) [includes: biotin carboxylase	UniProt_AC=P71538	Is_Pseudogene=No	lipid metabolism
RVBD_0987	Rv0987	-3.20787	1.7049e-14	8.238e-13	52.6443	64.5187	317.098	759.852	298.528	0.418174	-7.67113		3.13778	8.59131	2.246e-15	1.10368e-13		Rv0987	1102542	1105109	+	Rv0987	Probable adhesion component transport transmembrane protein ABC transporter	Comments=Rv0987, (MTV044.15, MTCI237.01), len: 855 aa. Probable transmembrane protein ABC transporter supposedly involved in transport of adhesion component (see citation below), whose N-terminus shows similarity with hypothetical proteins, generally transmembrane proteins, e.g. CAB96016.1|AL360055 putative ABC transport system integral membrane protein from Streptomyces coelicolor (855 aa)	UniProt_AC=O53900	Is_Pseudogene=No	cell wall and cell processes
RVBD_0988	Rv0988	-4.25476	6.59518e-82	1.20761e-79	77.1636	85.0542	1344.5	1746.53	813.31	0.221949	-19.17		4.1814	10.2243	2.16129e-35	2.65514e-33		Rv0988	1105116	1106276	+	Rv0988	Possible conserved exported protein	Comments=Rv0988, (MTCI237.02), len: 386 aa. Possible conserved exported protein, with potential N-terminal signal sequence, similar (except in N-terminus) to O32737|L63540 ATTH protein from Agrobacterium tumefaciens (355 aa), FASTA scores: opt: 651, E(): 5.7e-33, (33.4% identity in 344 aa overlap)	UniProt_AC=O86370	Is_Pseudogene=No	cell wall and cell processes
RVBD_0991c	Rv0991c	-4.85624	1.29186e-124	3.74533e-122	109.345	92.1482	2676.31	3152.82	1507.66	0.204532	-23.7432		4.78518	11.1762	4.64659e-46	7.13541e-44		Rv0991c	1108172	1108504	-	Rv0991c	Conserved serine rich protein	Comments=Rv0991c, (MTCI237.05c), len: 110 aa. Conserved ser-rich protein (especially in C-terminus), highly similar to N-terminus of NP_301255.1|NC_002677 conserved hypothetical protein (Ser-rich C-terminus) from Mycobacterium leprae (99 aa). Also highly similar to SCE22.04|AB90971.1|AL355832 hypothetical protein from Streptomyces coelicolor (110 aa)	UniProt_AC=O05574	Is_Pseudogene=No	conserved hypotheticals		SUBFAMILY NOT MED (PTHR34404:SF2)	redox-regulated chaperones; oxidized Ruc promotes the protein-folding activity of the essential M. tuberculosis Hsp70 chaperone system. (doi: 10.1128/mBio.01545-20)
RVBD_0992c	Rv0992c	-3.75032	4.36593e-26	3.70465e-24	24.1587	34.7983	456.621	340.232	213.953	0.355002	-10.5642		3.67386	7.87954	1.41868e-20	8.93766e-19		Rv0992c	1108578	1109171	-	Rv0992c	Conserved hypothetical protein	Comments=Rv0992c, (MTCI237.06c), len: 197 aa. Conserved hypothetical protein, equivalent to NP_301256.1|NC_002677 conserved hypothetical protein from Mycobacterium leprae (197 aa). Also similar, except in N-terminus, to other hypothetical proteins and ligases e.g. SCE87.34|CAB59679.1|AL132674 hypothetical protein from Streptomyces coelicolor (204 aa)	UniProt_AC=O05575	Is_Pseudogene=No	conserved hypotheticals		5-FORMYLTETRAHYDROFOLATE CYCLO-LIGASE (PTHR23407:SF1)	5,10-methenyltetrahydrofolate synthase (MTHFS; also called 5-formyltetrahydrofolate cyclo-ligase; EC 6.3.3.2); folate homeostasis (DOI 10.1074/jbc.M111.231076)
RVBD_0997	Rv0997	-2.98465	5.80074e-09	1.92198e-07	14.333	11.3505	88.7875	113.411	56.9704	0.512615	-5.8224		2.91272	5.24841	8.3995e-06	8.47049e-05		Rv0997	1114293	1114724	+	Rv0997	Hypothetical protein	Comments=Rv0997, (MTCI237.11), len: 143 aa. Hypothetical unknown protein, equivalent to AAK45276.1 from Mycobacterium tuberculosis strain CDC1551 (87 aa) but longer 56 aa.	UniProt_AC=O05580	Is_Pseudogene=No	conserved hypotheticals
RVBD_1012	Rv1012	-6.44559	2.89886e-128	9.1683e-126	13.2512	9.85702	951.294	1054.72	507.281	0.26752	-24.0939		6.37187	9.41881	4.77633e-60	9.77954e-58		Rv1012	1131128	1131421	+	Rv1012	Hypothetical protein	Comments=Rv1012, (MTCI237.29), len: 97 aa. Hypothetical unknown protein.	UniProt_AC=O05597	Is_Pseudogene=No	conserved hypotheticals
RVBD_1013	Rv1013	-2.56007	2.6159e-28	2.39492e-26	199.58	239.182	1154.24	1428.98	755.494	0.232013	-11.0341		2.48635	10.1526	3.72683e-15	1.79545e-13		Rv1013	1131625	1133259	+	pks16	Putative polyketide synthase Pks16	Comments=Rv1013, (MTCI237.30-MTCY10G2.36c), len: 544 aa. Putative pks16, polyketide synthase, similar to many e.g. N-terminus of Q50857|U24657 saframycin MX1 synthetase B (1770 aa), FASTA scores: opt: 526, E(): 1.4e-25, (29.3% identity in 542 aa overlap)	UniProt_AC=O05598	Is_Pseudogene=No	lipid metabolism
RVBD_1043c	Rv1043c	-2.47671	2.3654e-08	6.63647e-07	21.9051	27.5549	139.523	136.093	81.269	0.443624	-5.5829		2.40238	6.21226	1.11509e-05	0.000106606		Rv1043c	1165781	1166806	-	Rv1043c	Conserved hypothetical protein	Comments=Rv1043c, (MTCY10G2.06), len: 341 aa. Conserved hypothetical protein similar to AL096872|SC5F7.08 putative lipoate-protein ligase from Streptomyces coelicolor (362 aa), FASTA scores: opt: 206, E(): 1.4e-05, (30.3% identity in 201 aa overlap). Weak similarity to P39668|YYXA_BACSU hypothetical protease from Bacillus subtitis (400 aa), FASTA scores: opt: 159, E(): 0.013, (27.1% identity in 2…	UniProt_AC=P96358	Is_Pseudogene=No	conserved hypotheticals			HtrA-like serine protease Rv1043c(https://doi.org/10.4161/viru.22329)
RVBD_1087A	Rv1087A	-1.91921	0.00146657	0.0106518	15.1442	19.6394	63.4196	68.0465	41.5624	0.603293	-3.18122		1.8443	5.27616	0.0114217	0.0363512		Rv1087A	1214040	1214360	+	Rv1087A	Conserved hypothetical protein	Comments=Rv1087A, len: 106 aa (fragment). Conserved hypothetical protein, highly similar to C-terminus of near ORF O53434|YA86_MYCTU|Rv1086|MT1118|MTV017.39 short (C15) chain Z-isoprenyl diphosphate synthase from Mycobacterium tuberculosis (262 aa), FASTA scores: opt: 200, E(): 1.1e-06, (57.9% identity in 76 aa overlap).	UniProt_AC=Q8VK75	Is_Pseudogene=No	cell wall and cell processes
RVBD_1089A	Rv1089A	-2.33117	0.00987593	0.0414456	6.67068	5.37656	50.7357	11.3411	18.531	0.903502	-2.58014							Rv1089A	1215517	1215621	+	celA2a	Probable cellulase CelA2a (endo-1,4-beta-glucanase) (endoglucanase) (carboxymethyl cellulase)	Comments=Rv1089A, len: 34 aa. Probable celA2a, first part of cellulase (endoglucanase), similar to N-terminus of others. This region is a possible MT-complex-specific genomic island (See Becq et al., 2007).	UniProt_AC=Q79FS6	Is_Pseudogene=No	intermediary metabolism and respiration			Cellulose to glucose degradation; Mycobrowser
RVBD_1105	Rv1105	-1.79646	0.00801548	0.0357611	14.6935	12.9187	50.7357	45.3643	30.9281	0.677547	-2.65142							Rv1105	1232311	1232826	+	Rv1105	Possible para-nitrobenzyl esterase (fragment)	Comments=Rv1105, (MTV017.58), len: 171 aa. Possible para-nitrobenzyl esterase (fragment	UniProt_AC=O53453	Is_Pseudogene=No	intermediary metabolism and respiration
RVBD_1111c	Rv1111c	-1.36124	0.000394668	0.00385539	67.428	62.7265	139.523	192.798	115.619	0.384138	-3.54362		1.28983	7.25536	0.00384699	0.015075		Rv1111c	1237209	1238192	-	Rv1111c	Conserved hypothetical protein	Comments=Rv1111c, (MTV017.64c), len: 327 aa. Conserved hypothetical protein, N-termil domain is hydrophobic, C-termil half is very rich in Arg. Equivalent to AL049491|MLCB1222_2 hypothetical protein from Mycobacterium leprae (379 aa) (46.0% identity in 374 aa overlap). Start changed since first submission. A core mycobacterial gene	UniProt_AC=O86351	Is_Pseudogene=No	conserved hypotheticals
RVBD_1134	Rv1134	-5.21598	6.75646e-15	3.35796e-13	1.44231	2.38958	63.4196	79.3876	36.6598	0.669664	-7.78896		5.12834	2.87336	1.35566e-07	2.41681e-06		Rv1134	1261922	1262158	+	Rv1134	Hypothetical protein	Comments=Rv1134, (MTCI65.01), len: 78 aa. Hypothetical unknown protein.	UniProt_AC=O06534	Is_Pseudogene=No	conserved hypotheticals
RVBD_1142c	Rv1142c	-2.05941	0.00457905	0.0246859	10.4567	9.633	38.0518	45.3643	25.8765	0.726361	-2.83525							Rv1142c	1269152	1269958	-	echA10	Probable enoyl-CoA hydratase EchA10 (enoyl hydrase) (unsaturated acyl-CoA hydratase) (crotonase)	Comments=Rv1142c, (MTCI65.09c), len: 268 aa. Probable echA10, enoyl-CoA hydratase, similar to others e.g. CAA66096.1|X97452 enoyl-CoA isomerase from Escherichia coli (262 aa), FASTA scores: opt: 525, E(): 1.3e-26, (35.1% identity in 251 aa overlap)	UniProt_AC=O06542	Is_Pseudogene=No	lipid metabolism
RVBD_1146	Rv1146	-1.13982	0.00896643	0.038559	55.7092	74.8238	152.207	136.093	104.708	0.436155	-2.61333							Rv1146	1273355	1274767	+	mmpL13b	Probable conserved transmembrane transport protein MmpL13b	Comments=Rv1146, (MTCI65.13), len: 470 aa. Probable mmpL13b, conserved transmembrane transport protein (see citation below), member of RND superfamily, showing some similarity to putative Mycobacterial and Streptomyces membrane proteins e.g. Q53902|C40046 antibiotic transport-associated protein from Streptomyces coelicolor (711 aa), FASTA scores: opt: 193, E(): 2.1e-05, (28.9% identity in 394 aa …	UniProt_AC=O06546	Is_Pseudogene=No	cell wall and cell processes			nucleotide phosphatase(PC00173)
RVBD_1151c	Rv1151c	-2.52058	1.65135e-30	1.55271e-28	208.684	177.128	1078.13	1134.11	649.513	0.219552	-11.4806		2.44978	9.91539	5.64937e-15	2.64818e-13		Rv1151c	1278904	1279617	-	Rv1151c	Transcriptional regulatory protein	Comments=Rv1151c, (MTCI65.18c), len: 237 aa. Transcriptional regulatory protein, similar to others AE000776|AE000776_10 Aquifex aeolicus (239 aa), FASTA scores: opt: 725, E(): 0, (46.4% identity in 237 aa overlap)	UniProt_AC=P66813	Is_Pseudogene=No	regulatory proteins			bifunctional enzyme with both lysine desuccinylation and deacetylation activities in Mtb;widespread roles for lysine succinylation in regulating metabolism and diverse processes in Mtb (https://doi.org/10.1074/mcp.M114.045922); deacetylate HupB
RVBD_1154c	Rv1154c	-4.62637	3.13233e-113	7.78383e-111	63.0109	55.6324	1395.23	1531.05	761.23	0.204577	-22.6143		4.55436	10.1112	2.71673e-41	3.70834e-39		Rv1154c	1280843	1281484	-	Rv1154c	Hypothetical protein	Comments=Rv1154c, (MTCI65.21c), len: 213 aa. Hypothetical unknown protein, start uncertain.	UniProt_AC=O06552	Is_Pseudogene=No	conserved hypotheticals		SUBFAMILY NOT MED (PTHR36439:SF1)
RVBD_1170	Rv1170	-4.8722	5.84252e-06	0.000116149	0.721155	0.896093	12.6839	34.0232	12.0811	1.07506	-4.53201		4.76632	1.33203	0.00599781	0.0217634		Rv1170	1300304	1301215	+	mshB	N-acetyl-1-D-myo-inosityl-2-amino-2-deoxy-alpha-D-glucopyranoside deacetylase MshB (GlcNAc-Ins deacetylase)	Comments=Rv1170, (MTV005.06), len: 303 aa. MshB, N-Acetyl-1-D-myo-Inosityl-2-Amino-2-Deoxy-alpha-D-Glucopyranoside Deacetylase (GlcNAc-Ins deacetylase) (see citation below), similar to Q54358|X79146 lmbE gene from Streptomyces lincolnensis (270 aa), FASTA scores: opt: 308, E(): 1.2e-15, (32.0% identity in 278 aa overlap). Also similar to Rv1082|MCA Mycothiol conjugate amidase from Mycobacterium t…	UniProt_AC=O50426	Is_Pseudogene=No	intermediary metabolism and respiration
RVBD_1176c	Rv1176c	-2.0628	0.00115847	0.00893643	12.4399	16.1297	50.7357	68.0465	36.8379	0.63492	-3.24891		1.98786	4.99392	0.00919075	0.030471		Rv1176c	1308223	1308792	-	Rv1176c	Conserved hypothetical protein	Comments=Rv1176c, (MTV005.12c), len: 189 aa. Conserved hypothetical protein, some similarity to P94443|D78508 hypothetical protein from Bacillus subtilis (182 aa), FASTA scores: opt: 219, E(): 1.7e-15, (25.1% identity in 183 aa overlap). Similar to Mycobacterium tuberculosis hypothetical protein Rv0047c.	UniProt_AC=O50432	Is_Pseudogene=No	conserved hypotheticals		SUBFAMILY NOT MED (PTHR43252:SF4)	attenuated in primates (https://doi.org/10.1086/652497)
RVBD_1205	Rv1205	-1.70054	0.0125146	0.049588	18.4796	22.701	114.155	22.6822	44.5045	0.680952	-2.49729							Rv1205	1348719	1349282	+	Rv1205	Conserved hypothetical protein	Comments=Rv1205, (MTCI364.17), len: 187 aa. Conserved hypothetical protein, similar to Q49952 cosmid B1756 from Mycobacterium leprae (187 aa), FASTA scores: opt: 865, E(): 0, (72.4% identity in 174 aa overlap), also similar to FAS6_RHOFA|P46378 hypothetical 21.1 kDa protein in fasciation locus (ORF6) (198 aa), FASTA scores: opt: 368, E(): 1.3e-17, (37.4% identity in 174 aa overlap). Some similari…	UniProt_AC=O05306	Is_Pseudogene=No	conserved hypotheticals		LOG FAMILY PROTEIN YJL055W (PTHR31223:SF11)	mycobacterial proteasomal substrate encoded by Rv1205, which appears to code for a homolog of the plant-like enzyme LONELY GUY, is responsible for proteasome-mediated nitric oxide resistance.(doi:10.1016/j.molcel.2015.01.024.)
RVBD_1206	Rv1206	-6.46533	4.82398e-182	2.7971e-179	254.027	182.728	18734.2	19846.9	9754.45	0.22471	-28.7719		6.39619	13.9345	3.06944e-70	8.37958e-68		Rv1206	1349332	1351125	+	fadD6	Probable fatty-acid-CoA ligase FadD6 (fatty-acid-CoA synthetase) (fatty-acid-CoA synthase)	Comments=Rv1206, (MTCI364.18), len: 597 aa. Probable fadD6, fatty-acid-CoA synthetase, highly similar to several e.g. NP_251583.1|NC_002516 probable very-long-chain acyl-CoA synthetase from Pseudomonas aeruginosa (608 aa)	UniProt_AC=O05307	Is_Pseudogene=No	lipid metabolism
RVBD_1210	Rv1210	-2.53056	1.58584e-12	7.07327e-11	40.0241	38.3827	177.575	272.186	132.042	0.358093	-7.06677		2.45822	7.15808	2.42211e-08	5.26648e-07		Rv1210	1353522	1354136	+	tagA	Probable DNA-3-methyladenine glycosylase I TagA (tag I) (3-methyladenine-DNA glycosylase I, constitutive) (DNA-3-methyladenine glycosidase I)	Comments=Rv1210, (MTCI364.22), len: 204 aa. Probable tagA, DNA-3-methyladenine glycosidase I (see citation below), similar to several e.g. 3MG1_ECOLI|P05100 DNA-3-methyladenine glycosidase I from Escherichia coli (187 aa), FASTA scores: opt: 530, E(): 1.3e-27, (44.2% identity in 190 aa overlap)	UniProt_AC=O05311	Is_Pseudogene=No	information pathways
RVBD_1244	Rv1244	-3.81311	4.42278e-13	2.05158e-11	7.75241	8.58756	164.891	68.0465	62.3194	0.52653	-7.24195		3.73893	4.91593	1.3075e-07	2.37965e-06		Rv1244	1386857	1387717	+	lpqZ	Probable lipoprotein LpqZ	Comments=Rv1244, (MTV006.16), len: 286 aa. Probable lipoprotein lpqZ, equivalent toU15180|MLU1518042 protein u1756x from Mycobacterium leprae (228 aa), FASTA scores: opt: 1039, E(): 0, (72.5% identity in 229 aa overlap). Similar to Mycobacterium tuberculosis hypothetical protein Rv3759c. Contains PS00013 Prokaryotic membrane lipoprotein lipid attachment site.	UniProt_AC=O50459	Is_Pseudogene=No	cell wall and cell processes			lipoproteins belonged to the ABC transport systems with a role in peptide transport (DOI 10.1074/ mcp.M112.018846)
RVBD_1249c	Rv1249c	-2.00679	1.44436e-11	5.98205e-10	179.568	134.937	722.984	544.372	395.465	0.297153	-6.75338		1.93719	9.1541	6.97465e-09	1.6967e-07		Rv1249c	1393194	1393982	-	Rv1249c	Possible membrane protein	Comments=Rv1249c, (MTV006.21c), len: 262 aa. Possible membrane protein. Start uncertain. A core mycobacterial gene	UniProt_AC=O50464	Is_Pseudogene=No	cell wall and cell processes
RVBD_1250	Rv1250	-1.54805	0.00438974	0.0239676	34.5253	27.4055	126.839	56.7054	61.3689	0.543423	-2.84871		1.4762	6.09985	0.0148448	0.045191		Rv1250	1394179	1395918	+	Rv1250	Probable drug-transport integral membrane protein	Comments=Rv1250, (MTV006.22), len: 579 aa. Probable drug-transport integral membrane protein, member of major facilitator superfamily (MFS), highly similar to several including P39886|TCMA_STRGA tetracenomycin C resistance protein from Streptomyces glaucescens (538 aa), FASTA scores: opt: 847, E(): 0, (32.9% identity in 517 aa overlap)	UniProt_AC=O50465	Is_Pseudogene=No	cell wall and cell processes			efflux pump
RVBD_1268c	Rv1268c	-1.63019	0.000140397	0.00164458	40.4748	40.7722	126.839	124.752	83.2095	0.428157	-3.80747		1.55805	6.60318	0.00277986	0.0115099		Rv1268c	1417658	1418356	-	Rv1268c	Hypothetical protein	Comments=Rv1268c, (MTCY50.14), len: 232 aa. Hypothetical unknown protein, probably secreted protein : contains possible sigl peptide sequence (score 7.9 at residue 28). Predicted to be an outer membrane protein (See Song et al., 2008).	UniProt_AC=P64791	Is_Pseudogene=No	conserved hypotheticals			metalloprotease(PC00153)
RVBD_1290A	Rv1290A	-4.91465	0.00140906	0.0102986	0.360577	0.448047	25.3678	0	6.54412	1.5393	-3.19279							Rv1290A	1445058	1445372	+	Rv1290A	Hypothetical protein	Comments=Rv1290A, len: 104 aa. Hypothetical unknown protein, equivalent to AAK45590 from Mycobacterium tuberculosis strain CDC1551 (122 aa) but shorter 18 aa.	UniProt_AC=Q79FQ6	Is_Pseudogene=No	conserved hypotheticals
RVBD_1291c	Rv1291c	-3.58792	0.000299307	0.0030447	1.89303	2.09088	25.3678	22.6822	13.0085	0.992261	-3.6159		3.50192	2.24943	0.013456	0.0417443		Rv1291c	1445499	1445834	-	Rv1291c	Conserved hypothetical secreted protein	Comments=Rv1291c, (MTCY373.10c), len: 111 aa. Conserved hypothetical secreted protein, similar to others in Mycobacterium tuberculosis e.g. Rv1271c|Q11048|YC71_MYCTU hypothetical 11.6 kDa protein (113 aa), FASTA score: opt: 246, E(): 1.7e-09, (40.0% identity in 110 aa overlap)	UniProt_AC=P0A5E5	Is_Pseudogene=No	cell wall and cell processes
RVBD_1309	Rv1309												2.72728	3.51489	0.0159132	0.0476815		Rv1309	1464884	1465801	+	atpG	Probable ATP synthase gamma chain AtpG	Comments=Rv1309, (MTCY373.29), len: 305 aa. Probable atpG, ATP synthase gamma chain, highly similar to ATPG_MYCLE|P45824 ATP synthase gamma chain from Mycobacterium leprae (298 aa), FASTA scores: opt: 1579, E():0, (83.9% identity in 305 aa overlap). Contains PS00153 ATP synthase gamma subunit signature. subunit: F-type ATPases have 2 components, cf(1) - the catalytic core - and cf(0) - the membra…	UniProt_AC=P63671	Is_Pseudogene=No	intermediary metabolism and respiration
RVBD_1330c	Rv1330c	-3.183	2.88188e-18	1.79037e-16	24.1587	23.1491	177.575	249.504	118.597	0.36519	-8.71601		3.10955	6.75021	1.2831e-10	4.26023e-09		Rv1330c	1499213	1500559	-	pncB1	Nicotinic acid phosphoribosyltransferase PncB1	Comments=Rv1330c, (MTCY130.15c), len: 448 aa. PncB1, nicotinic acid phosphoribosyltransferase (See Boshoff et al., 2008). Similar to e.g. O32090 YUEK protein from Bacillus subtilis (490 aa), FASTA scores: E(): 8.6e-22, (37.9% identity in 369 aa overlap). Also similar to Mycobacterium tuberculosis Rv0573c|MTV039.11c (38.0% identity in 437 aa overlap). Start changed since original submission based …	UniProt_AC=Q10641	Is_Pseudogene=No	intermediary metabolism and respiration
RVBD_1336	Rv1336	-1.28739	0.000148513	0.00173382	87.9809	98.0475	202.943	249.504	159.619	0.339362	-3.79354		1.21445	7.79952	0.00228547	0.0098516		Rv1336	1503394	1504365	+	cysM	Cysteine synthase B CysM (CSASE B) (O-phosphoserine sulfhydrylase B) (O-phosphoserine (thiol)-lyase B)	Comments=Rv1336, (MTCY130.21), len: 323 aa. cysM, cysteine synthase B, similar to many e.g. CYSM_ECOLI|P16703 Escherichia coli (303 aa), FASTA scores: opt: 720, E(): 4.6e-40, (41.1% identity in 302 aa overlap). Also similar to other Mycobacterium tuberculosis cysteine synthase subunits e.g. Rv1077, Rv2334, Rv0848, etc. Contains PS00901 Cysteine synthase/cystathionine beta-synthase P-phosphate att…	UniProt_AC=P63873	Is_Pseudogene=No	intermediary metabolism and respiration			cysteine biogenesis
RVBD_1340	Rv1340	-6.54954	9.24462e-44	1.237e-41	2.07332	1.64284	152.207	192.798	87.1804	0.47211	-13.8729		6.45967	4.78811	2.22984e-18	1.30446e-16		Rv1340	1506755	1507534	+	rphA	Probable ribonuclease RphA (RNase PH) (tRNA nucleotidyltransferase)	Comments=Rv1340, (MTCY130.25), len: 259 aa. Probable rphA, Ribonuclease ph, highly similar to others e.g. RNPH_MYCLE|P37939 Mycobacterium leprae (259 aa), FASTA scores: opt: 1524, E(): 0, (88.8% identity in 259 aa overlap). Belongs to the RNASE PH family.	UniProt_AC=Q10628	Is_Pseudogene=No	information pathways			phosphorolytic ribonuclease (RNase PH)is involved in the 3′ processing of RNAs. RNase PH removes nucleotides downstream of the 3′-CCA sequence, required for aminoacylation of tRNAs, from tRNA precursors with 3′ extensions. It is also involved in other RNA maturation and quality control processes, including the maturation of rRNA (https://doi.org/10.1126/sciadv.abb6651).
RVBD_1341	Rv1341	-5.98393	5.29357e-60	8.37105e-58	4.23678	5.22721	342.466	260.845	153.194	0.366257	-16.338		5.90604	6.87434	2.38922e-32	2.79539e-30		Rv1341	1507573	1508187	+	Rv1341	Conserved protein	Comments=Rv1341, (MTCY130.26), len: 204 aa. Conserved protein, some similarity to P52061|YGGV_ECOLI hypothetical protein yggV (197 aa), FASTA scores: opt: 521, E(): 7.9e-27, (46.0% identity in 200 aa overlap). Equivalent to ML014|U00014 hypothetical protein B1549_C2_213 from Mycobacterium leprae (285 aa), FASTA scores: opt: 1073, E(): 0, (83.0% identity in 206 aa overlap).	UniProt_AC=P64307	Is_Pseudogene=No	conserved hypotheticals		INOSINE TRIPHOSPHATE PYROPHOSPHATASE (PTHR11067:SF9)
RVBD_1342c	Rv1342c	-5.03782	4.02592e-24	3.18322e-22	5.40866	11.4252	329.782	226.822	143.359	0.497269	-10.131		4.95312	6.78251	3.79059e-22	2.58708e-20		Rv1342c	1508184	1508546	-	Rv1342c	Conserved membrane protein	Comments=Rv1342c, (MTCY02B10.06c), len: 120 aa. Conserved membrane protein. Highly similar to G466926|P54133 hypothetical protein B1549_F2_59 from Mycobacterium leprae (119 aa), FASTA scores, opt: 544, E(): 1.9e-29, (68.3 % identity in 120 aa overlap). A core mycobacterial gene	UniProt_AC=P0A5E7	Is_Pseudogene=No	cell wall and cell processes
RVBD_1344	Rv1344	-2.52348	3.75684e-12	1.61359e-10	40.9255	43.9086	177.575	306.209	142.155	0.363298	-6.94604		2.45054	7.30545	1.98182e-08	4.55077e-07		Rv1344	1508968	1509288	+	mbtL	Acyl carrier protein (ACP) MbtL	Comments=Rv1344, (MTCY02B10.08), len: 106 aa. mbtL, acyl carrier protein, similar to others e.g. ACP_RHIME|P19372 Rhizobium meliloti (77 aa), FASTA scores: opt: 117, E(): 0.03, (29.9% identity in 67 aa overlap) and ACP_SYNY3|P20804 acyl carrier protein (acp) from Synechocystis sp (77 aa), FASTA scores: E(): 7.1e-05, (34.8% identity in 66 aa overlap). Also similar to Rv2244 and Rv0033 from Mycobac…	UniProt_AC=P63452	Is_Pseudogene=No	lipid metabolism
RVBD_1362c	Rv1362c	-2.37841	0.00164073	0.0116019	6.94111	11.5745	63.4196	34.0232	28.9896	0.755394	-3.14857		2.29885	4.36552	0.0101831	0.0329644		Rv1362c	1533948	1534610	-	Rv1362c	Possible membrane protein	Comments=Rv1362c, (MTCY02B10.26c), len: 220 aa. Possible membrane protein, similar to Mycobacterium tuberculosis hypothetical proteins e.g. Rv1362c|MTCY02B10.27c (25.9% identity in 216 aa overlap), Rv0177, Rv1973, Rv1972, etc.	UniProt_AC=Q11032	Is_Pseudogene=No	cell wall and cell processes
RVBD_1414	Rv1414	-2.56725	0.00751206	0.0341181	4.0565	4.03242	25.3678	22.6822	14.0347	0.960348	-2.67325							Rv1414	1589891	1590292	+	Rv1414	Conserved hypothetical protein	Comments=Rv1414, (MTCY21B4.31), len: 133 aa. Conserved hypothetical protein, similar to C-termil part of AB010956|AB010956_1 novel metal-activated pyridoxal enzyme from Arthrobacter sp. (379 aa), FASTA scores: opt: 163, E(): 0.00063, (32.1% identity in 112 aa overlap). Rv1413 is similar to N-termil part of same enzyme suggesting possible frameshift. Sequence has been checked and no errors found, …	UniProt_AC=P64845	Is_Pseudogene=No	conserved hypotheticals		SUBFAMILY NOT MED (PTHR28004:SF7)
RVBD_1422	Rv1422	-4.55835	1.10418e-08	3.34038e-07	1.6226	2.38958	25.3678	68.0465	24.3566	0.797765	-5.7139		4.46985	2.57533	7.35043e-05	0.000559134		Rv1422	1596881	1597909	+	Rv1422	Conserved hypothetical protein	Comments=Rv1422, (MTCY21B4.40), len: 342 aa. Conserved hypothetical protein, similar to many hypothetical proteins e.g. YAMB_THETU|P38541 Thermoaerobacterium thermosulfurigenes (323 aa), FASTA scores: opt: 519, E(): 1.6e-25, (33.1% identity in 320 aa overlap)	UniProt_AC=P71691	Is_Pseudogene=No	conserved hypotheticals		GLUCONEOGENESIS FACTOR-RELATED (PTHR30135:SF3);nucleotide phosphatase(PC00173);transporter(PC00227)	nutrient utilization, cell wall synthesis(https://doi.org/10.1128/IAI.02207-14)
RVBD_1449c	Rv1449c	-3.93168	0.00112465	0.00871416	1.53245	0.821419	12.6839	22.6822	9.42999	1.20703	-3.25733							Rv1449c	1628097	1630199	-	tkt	Transketolase Tkt (TK)	Comments=Rv1449c, (MTCY493.05), len: 700 aa. tkt, transketolase. Highly similar to several e.g. TKT_MYCLE|P46708 transketolase (tk) from Mycobacterium leprae (699 aa), FASTA scores: opt: 4216, E(): 0, (89.1% identity in 700 aa overlap). Start site chosen by homology. Contains PS00801 Transketolase signature 1. Belongs to the transketolase family. Thought to be differentially expressed within host…	UniProt_AC=O06811	Is_Pseudogene=No	intermediary metabolism and respiration			links oxidative PPP to arabinan biosynthesis (http://dx.doi.org/10.1098/rsob.110026)
RVBD_1458c	Rv1458c	-4.985	2.47393e-17	1.38819e-15	9.73559	31.9607	469.305	850.581	340.396	0.588613	-8.46905		4.90499	8.7352	4.37565e-28	4.30039e-26		Rv1458c	1643319	1644260	-	Rv1458c	Probable unidentified antibiotic-transport ATP-binding protein ABC transporter	Comments=Rv1458c, (MTV007.05c), len: 313 aa. Possible unidentified antibiotic-transport ATP-binding protein ABC transporter (see citation below), equivalent to Z99125|MLCL536.31 from Mycobacterium leprae (315 aa), FASTA scores: opt: 1812, E(): 0, (88.0% identity in 308 aa overlap). Similar to AF027770|AF027770_7 ABC-type transporter in FxbA region in Mycobacterium smegmatis (284 aa), FASTA scores…	UniProt_AC=O53149	Is_Pseudogene=No	cell wall and cell processes
RVBD_1460	Rv1460	-1.72763	0.00100556	0.00806072	29.1166	24.8666	63.4196	113.411	57.7034	0.525281	-3.28897		1.65702	5.94762	0.00760145	0.0261946		Rv1460	1646186	1646992	+	Rv1460	Probable transcriptional regulatory protein	Comments=Rv1460, (MTV007.07), len: 268 aa. Probable transcriptional regulatory protein. Equivalent to Z99125|MLCL536.29c hypothetical protein from Mycobacterium leprae (254 aa), FASTA scores: opt: 1273, E(): 0, (79.6% identity in 250 aa overlap). Possible helix-turn-helix motif between aa 68 - 89. Start changed since original submission.	UniProt_AC=O53151	Is_Pseudogene=No	regulatory proteins			SufR
RVBD_1467c	Rv1467c	-1.59892	0.00010937	0.00132577	65.8054	48.7624	164.891	181.457	115.229	0.413286	-3.86881		1.52972	7.1723	0.00065557	0.00354008		Rv1467c	1653673	1655502	-	fadE15	Probable acyl-CoA dehydrogenase FadE15	Comments=Rv1467c, (MTV007.14c), len: 609 aa. Probable fadE15, acyl-CoA dehydrogenase, highly similar to NP_302639.1|NC_002677 acyl-CoA dehydrogenase from Mycobacterium leprae (611 aa). Also highly similar to many e.g. T36481 probable acyl-CoA dehydrogenase (fragment) from Streptomyces coelicolor (491 aa) (has its N-terminus very shorter)	UniProt_AC=O53158	Is_Pseudogene=No	lipid metabolism
RVBD_1468c	Rv1468c	-2.47256	0.000622903	0.00554943	16.3161	7.54212	76.1035	56.7054	39.1668	0.722666	-3.42144		2.40434	4.82293	0.00220949	0.00962537		Rv1468c	1655609	1656721	-	PE_PGRS29	PE-PGRS family protein PE_PGRS29	Comments=Rv1468c, (MTV007.15c), len: 370 aa. PE_PGRS29, Member of the Mycobacterium tuberculosis PE family, PGRS subfamily of gly-rich proteins (see citation below).	UniProt_AC=Q79FP0	Is_Pseudogene=No	PE/PPE
RVBD_1493	Rv1493	-2.34959	8.55973e-09	2.63534e-07	35.6972	30.3925	202.943	136.093	101.281	0.408125	-5.75705		2.27877	6.67644	4.97502e-06	5.55619e-05		Rv1493	1684005	1686257	+	mutB	Probable methylmalonyl-CoA mutase large subunit MutB (MCM)	Comments=Rv1493, (MTCY277.15), len: 750 aa. Probable mutB, Methylmalonyl-CoA mutase large-subunit, strong similarity to e.g. MUTB_STRCM|Q05065 methylmalonyl-CoA mutase alpha-subunit from Streptomyces cinnamonensis (733 aa), FASTA scores: opt: 3562, E(): 0, (75.8% identity in 730 aa overlap). Contains PS00544 Methylmalonyl-CoA mutase signature. Belongs to the methylmalonyl-CoA mutase family.	UniProt_AC=P65487	Is_Pseudogene=No	lipid metabolism
RVBD_1494	Rv1494	-3.65453	7.4555e-73	1.23513e-70	109.525	98.4956	1255.71	1360.93	706.165	0.202432	-18.0531		3.58279	10.0086	1.79976e-28	1.8425e-26		Rv1494	1686271	1686573	+	mazE4	Possible antitoxin MazE4	Comments=Rv1494, (MTCY277.16), len: 100 aa. Possible mazE4, antitoxin, part of toxin-antitoxin (TA) operon with Rv1495 (See Pandey and Gerdes, 2005	UniProt_AC=P0A5E9	Is_Pseudogene=No	virulence, detoxification, adaptation
RVBD_1515c	Rv1515c	-3.53212	7.84412e-06	0.000149943	2.88462	4.33112	38.0518	45.3643	22.658	0.790289	-4.46939		3.45052	3.15874	0.00191143	0.00853887		Rv1515c	1706630	1707526	-	Rv1515c	Conserved hypothetical protein	Comments=Rv1515c, (MTCY277.37c), len: 298 aa. Conserved hypothetical protein, similar to P71805|MTCY02B12.11C|Rv1377c Hypothetical protein from Mycobacterium tuberculosis, FASTA scores: E(): 1.3e-05, (25.4% identity in 134 aa overlap).	UniProt_AC=P71794	Is_Pseudogene=No	conserved hypotheticals			RD6 gene; stress response (https://doi.org/10.1016/j.micpath.2021.104778)
RVBD_1519	Rv1519	-3.86592	5.03945e-08	1.34863e-06	3.15505	4.18177	38.0518	68.0465	28.3588	0.709354	-5.44991		3.78406	3.31647	0.000141862	0.000994167		Rv1519	1710733	1711002	+	Rv1519	Conserved hypothetical protein	Comments=Rv1519, (MTCY19G5.09c), len: 89 aa. Conserved hypothetical protein, high similarity to C-terminus of Q50723|MTCY78.26|Rv3402c (412 aa) (58.1% identity in 74 aa overlap).	UniProt_AC=P64861	Is_Pseudogene=No	conserved hypotheticals		SUBFAMILY NOT MED (PTHR30244:SF9)	aspartic protease(PC00053); directly regulated by IdeR (https://doi.org/10.1128/IAI.73.9.5988-5994.2005); upregulated on DosR induction(https://doi.org/10.1371/journal.pone.0035935)
RVBD_1543	Rv1543	-7.59791	2.50733e-252	2.90766e-249	803.637	573.276	131418	135310	67026.4	0.223937	-33.9288		7.52898	16.7255	1.76775e-88	1.08584e-85		Rv1543	1745064	1746089	+	Rv1543	Possible fatty acyl-CoA reductase	Comments=Rv1543, (MTCY48.22c), len: 341 aa. Possible fatty-acyl CoA reductase, highly similar to P94129|U77680 fatty acyl-CoA reductase ACR1 from Acinetobacter calcoaceticus (295 aa), FASTA scores: opt: 899, E(): 0, (48.5% identity in 293 aa overlap). Also highly similar to acrA1|Rv3391|MTV004.49|NP_217908.1|NC_000962 fatty acyl-CoA reductase from Mycobacterium tuberculosis (650 aa). Also highly …	UniProt_AC=P66779	Is_Pseudogene=No	lipid metabolism			fatty acyl-coenzyme-A reductase genes involved in wax ester synthesis in Mtb.Our results indicate that the fcr1 and fcr2 gene products are involved in the synthesis and accumulation of WE that decrease Mtb cell wall permeability, reduce nutrient uptake and thus inhibit replication of the pathogen.(https://doi.org/10.1371/journal.pone.0051641); antibiotic susceptibility (https://doi.org/10.1128/mS…
RVBD_1544	Rv1544	-3.93171	7.40589e-18	4.44226e-16	16.226	12.396	304.414	136.093	117.282	0.456727	-8.60844		3.85888	6.45782	7.96154e-13	3.37267e-11		Rv1544	1746094	1746897	+	Rv1544	Possible ketoacyl reductase	Comments=Rv1544, (MTCY48.21), len: 267 aa. Possible ketoacyl reductase, highly similar to Z97179|MLCL383_26 putative oxidoreductase from Mycobacterium leprae (268 aa), FASTA score: (43.0% identity in 270 aa overlap). Also highly similar to others e.g. T29125 ketoacyl reductase homolog from Streptomyces coelicolor (276 aa)	UniProt_AC=Q10782	Is_Pseudogene=No	lipid metabolism
RVBD_1550	Rv1550	-4.94227	3.04888e-110	6.62941e-108	32.9928	36.5158	989.346	1145.45	551.076	0.221541	-22.3086		4.86863	9.57659	5.42352e-43	7.83859e-41		Rv1550	1753716	1755431	+	fadD11	Probable fatty-acid-CoA ligase FadD11 (fatty-acid-CoA synthetase) (fatty-acid-CoA synthase)	Comments=Rv1550, (MTCY48.15c), len: 571 aa. Probable fadD11, fatty-acid-CoA synthetase, similar, except in N-terminus, to many e.g. SC6A5.39|T35430 probable long-chain-fatty-acid--CoA ligase from Streptomyces coelicolor (612 aa)	UniProt_AC=Q10776	Is_Pseudogene=No	lipid metabolism
RVBD_1557	Rv1557	-3.31297	4.77743e-22	3.32413e-20	25.9616	28.0029	215.627	317.55	146.785	0.343209	-9.65292		3.23931	7.18105	1.3906e-13	6.2122e-12		Rv1557	1761744	1762937	+	mmpL6	Probable conserved transmembrane transport protein MmpL6	Comments=Rv1557, (MTCY48.08c), len: 397 aa. Probable mmpL6, conserved transmembrane transport protein (see citations below). Member of RND superfamily, with strong similarity to C-terminal part of members of large Mycobacterial membrane protein family belonging to RND superfamily including: mmpL1, mmpL2, mmpL3, etc. Probably truncated (see Brosch et al., 2002). Belongs to the MmpL family.	UniProt_AC=Q10773	Is_Pseudogene=No	cell wall and cell processes			oxidative stress response (https://doi.org/10.1093/infdis/jiy526)
RVBD_1588c	Rv1588c	-1.82946	3.85456e-06	8.02995e-05	56.5205	44.5806	177.575	181.457	115.033	0.396067	-4.61907		1.7594	7.09705	0.000101146	0.00073093		Rv1588c	1789168	1789836	-	Rv1588c	Partial REP13E12 repeat protein	Comments=Rv1588c, (MTCY336.16), len: 222 aa. Partial REP13E12 repeat protein (see citation below), nearly identical to ORF's in other Rep13E12 repeats, including Rv0095c|MTCY251.14c|Y05E_MYCTU|Q10891 hypothetical 15.4 kd protein cy251.14 from Mycobacterium tuberculosis (136 aa), FASTA results: opt: 613, E(): 9.9e-29, (86.5% identity in 111 aa overlap). This region is a possible MT-complex-specifi…	UniProt_AC=P0A5F1	Is_Pseudogene=No	insertion seqs and phages
RVBD_1632c	Rv1632c	-1.97825	3.55712e-05	0.000524374	32.5421	25.24	114.155	113.411	71.337	0.478473	-4.13451		1.90789	6.18686	0.00082496	0.00433104		Rv1632c	1836387	1836830	-	Rv1632c	Hypothetical protein	Comments=Rv1632c, (MTCY01B2.24c), len: 147 aa. Hypothetical unknown protein.	UniProt_AC=O06149	Is_Pseudogene=No	conserved hypotheticals
RVBD_1638A	Rv1638A	-3.14326	0.00395214	0.0221409	3.78606	1.71751	38.0518	11.3411	13.7241	1.09067	-2.88196							Rv1638A	1846716	1846973	-	Rv1638A	Conserved hypothetical protein	Comments=Rv1638A, len: 85 aa. Conserved hypothetical protein, similar to C-termil part of P31511|35KD_MYCTU 35kd immunogenic protein from Mycobacterium tuberculosis (270 aa), FASTA scores: opt: 159, E(): 0.002, (50.90% identity in 55 aa overlap)	UniProt_AC=Q8VJZ6	Is_Pseudogene=No	conserved hypotheticals
RVBD_1640c	Rv1640c	-3.18825	2.42271e-12	1.05358e-10	19.9219	36.6651	279.046	238.163	143.449	0.454965	-7.0077		3.1091	7.14229	4.41799e-12	1.72302e-10		Rv1640c	1848517	1852035	-	lysX	Lysyl-tRNA synthetase 2 LysX	Comments=Rv1640c, (MTCY06H11.04c), len: 1172 aa. lysX, lysyl-tRNA synthetase 2, probable two domain protein. N-terminal part (bases 1850153 to 1852033) is similar to AL023861|SC3C8_3 hypothetical membrane protein from Streptomyces coelicolor (589 aa), Fasta scores: opt: 1426, E(): 0, (44.6% identity in 585 aa overlap). The C-terminal part is similar to SYK_CRILO|P37879 lysyl-tRNA synthetases from…	UniProt_AC=P94974	Is_Pseudogene=No	information pathways			Catalyzes the production of L-lysyl-tRNA(Lys)transfer and the transfer of a lysyl group from L-lysyl-tRNA(Lys) to membrane-bound phosphatidylglycerol (PG), which produces lysylphosphatidylglycerol (LPG), one of the components of the bacterial membrane with a positive net charge. LPG synthesis contributes to the resistance to cationic antimicrobial peptides (CAMPs) and likely protects M.tuberculos…
RVBD_1657	Rv1657	-3.04932	5.4502e-08	1.44742e-06	16.4063	9.78235	126.839	90.7286	60.9391	0.560954	-5.43596		2.97911	5.32654	5.68712e-06	6.21034e-05		Rv1657	1870842	1871354	+	argR	Probable arginine repressor ArgR (AHRC)	Comments=Rv1657, (MTCY06H11.22), len: 170 aa. Probable argR, Arginine repressor (alternate gene name: ahrC). Similar to AHRC_BACSU|P17893 arginine hydroximate resistance protein from Bacillus subtilis (149 aa), FASTA scores: opt: 283, E(): 1.8e-11, (34.5% identity in 142 aa overlap)	UniProt_AC=P0A4Y8	Is_Pseudogene=No	regulatory proteins
RVBD_1668c	Rv1668c	-2.82475	0.000243875	0.00260155	8.11299	5.30188	25.3678	68.0465	26.7073	0.769978	-3.66861		2.7529	3.95794	0.00483571	0.0180293		Rv1668c	1894224	1895342	-	Rv1668c	Probable first part of macrolide-transport ATP-binding protein ABC transporter	Comments=Rv1668c, (MTV047.04c), len: 372 aa. Probable first part of macrolide-transport ATP-binding protein ABC transporter (see citation below), similar to many ATP-binding proteins ABC transporter e.g. X80735|SEABCT_1|Q54072 Saccharopolyspora erythraea ertX gene (481 aa), FASTA scores: opt: 938, E(): 0, (45.6% identity in 353 aa overlap)	UniProt_AC=O53916	Is_Pseudogene=No	cell wall and cell processes
RVBD_1694	Rv1694	-2.6688	1.34512e-18	8.50852e-17	69.321	65.4148	329.782	521.69	246.552	0.303207	-8.80191		2.59665	8.29718	1.75517e-12	7.0696e-11		Rv1694	1917940	1918746	+	tlyA	2'-O-methyltransferase TlyA	Comments=Rv1694, (MTCI125.16), len: 268 aa. TlyA, 2'-O-methyltransferase	UniProt_AC=Q50760	Is_Pseudogene=No	virulence, detoxification, adaptation			Catalyzes the 2'-O-methylation at nucleotides C1409 in 16S rRNA and C1920 in 23S rRNA (PubMed:16857584, PubMed:20854656).Is likely involved in ribosomal biogenesis (PubMed:21443791).hemolysin
RVBD_1716	Rv1716	-2.04232	0.00784046	0.0352871	11.7188	8.51288	25.3678	56.7054	25.5762	0.768116	-2.65886							Rv1716	1943576	1944406	+	Rv1716	Conserved hypothetical protein	Comments=Rv1716, (MTV048.03,MTCY04C12.01), len: 276 aa. Conserved hypothetical protein, shows high similarity with AF1200|O29068|AE001021_11A conserved protein of Archaeoglobus fulgidus, gp fulgidus section 7 (278 aa), FASTA scores: E(): 0, (61.8% identity in 251 a a overlap)	UniProt_AC=O53929	Is_Pseudogene=No	conserved hypotheticals		SUBFAMILY NOT MED (PTHR43564:SF2)
RVBD_1738	Rv1738	-4.0346	2.29515e-17	1.30899e-15	7.57212	7.09407	139.523	102.07	64.0648	0.475902	-8.47779		3.9605	4.87905	5.36854e-09	1.34597e-07		Rv1738	1965657	1965941	+	Rv1738	Conserved protein	Comments=Rv1738, (MTCY04C12.23), len: 94 aa. Conserved protein, similar to P71931|Rv2632c|YQ32_MYCTU Hypothetical 10.1 kDa protein from Mycobacterium tuberculosis (93 aa), FASTA scores: opt: 319, E(): 2.6e-27, (53.9% identity in 89 aa overlap). Predicted possible vaccine candidate (See Zvi et al., 2008).	UniProt_AC=P64887	Is_Pseudogene=No	conserved hypotheticals			the structure of Rv1738 revealed a surprising similarity to a family of stress proteins known as hibernation-promoting factors (HPFs). This suggests that the functional role of the up-regulated Rv1738 protein in nonreplicating persistence of Mtb is to contribute to the shutdown of ribosomal protein synthesis.(https://doi.org/10.1073/pnas.1422387112)
RVBD_1743	Rv1743	-1.82059	2.85616e-09	9.74173e-08	195.613	136.878	596.144	578.395	376.758	0.306514	-5.93966		1.75171	9.09742	1.65365e-07	2.92303e-06		Rv1743	1969004	1970704	+	pknE	Probable transmembrane serine/threonine-protein kinase E PknE (protein kinase E) (STPK E)	Comments=Rv1743, (MTCY28.05,MTCY04C12.28), len: 566 aa. Probable pknE, transmembrane serine/threonine protein kinase (see citation below), similar to PKN1_MYXXA|P33973 serine/threonine-protein kinase pkn1 (693 aa), fasta scores: opt: 542, E(): 1.1e-19, (35.8% identity in 302 aa overlap). Also highly similar to K08G_MYCTU|Q11053 probable serine/threonine-protein kinase (626 aa) (59.8% identity in …	UniProt_AC=P72001	Is_Pseudogene=No	regulatory proteins
RVBD_1753c	Rv1753c	-2.05455	0.00594606	0.0294258	8.65386	11.5745	50.7357	34.0232	26.2468	0.746909	-2.75074							Rv1753c	1981614	1984775	-	PPE24	PPE family protein PPE24	Comments=Rv1753c, (MTCY28.16c), len: 1053 aa. PPE24, Member of the Mycobacterium tuberculosis PPE family of Gly-, Asn-rich proteins, similar to many e.g. YF48_MYCTU|Q10778 hypothetical protein cy48.17 (678 aa), FASTA scores: opt: 1360, E(): 0, (48.9% identity in 550 aa overlap). Note that the Gly-, Asn-rich sequence is interrupted by six near-perfect 26 aa repeats, a unique region, and another, m…	UniProt_AC=Q79FL2	Is_Pseudogene=No	PE/PPE
RVBD_1758	Rv1758	-1.6665	0.00439533	0.0239676	22.2657	19.3407	76.1035	56.7054	43.6038	0.585086	-2.8483							Rv1758	1989042	1989566	+	cut1	Probable cutinase Cut1	Comments=Rv1758, (MTCY28.24), len: 174 aa. Probable cut1, serine esterase, cutinase family, similar to Rv2301|CUT2_MYCTU|Q50664 probable cutinase cy339.08c precursor from Mycobacterium tuberculosis (219 aa), FASTA scores: opt: 369, E(): 1. 1e-16, (39.1% identity in 179 aa overlap). Also similar to Mycobacterium tuberculosis hypothetical cutinases Rv3452, Rv1984c, Rv3451 and Rv3724. CDS has been i…	UniProt_AC=O06793	Is_Pseudogene=No	cell wall and cell processes
RVBD_1761c	Rv1761c	-1.52938	8.45614e-05	0.00108158	54.0866	57.6487	139.523	181.457	108.179	0.389048	-3.93109		1.45686	7.09268	0.00154448	0.00730255		Rv1761c	1994671	1995054	-	Rv1761c	Possible exported protein	Comments=Rv1761c, (MTCY28.27c), len: 127 aa. Possibly exported protein with hydrophobic stretch or TMhelix at aa 15-37.	UniProt_AC=O06796	Is_Pseudogene=No	cell wall and cell processes			https://doi.org/10.1002/pro.24
RVBD_1765c	Rv1765c	-2.2233	0.00334319	0.0200189	10.8173	11.8732	12.6839	90.7286	31.5258	0.757697	-2.93428		2.15349	4.6617	0.0121765	0.0384054		Rv1765c	1997418	1998515	-	Rv1765c	Conserved hypothetical protein	Comments=Rv1765c, (MTCY28.31c), len: 365 aa. Conserved hypothetical protein, highly similar to O53461|Rv2015c|MTV018.02c conserved hypothetical protein (418 aa), (97.8% identity in 364 aa overlap). Blast hits with non-is part of sequence submitted under MTU78639.	UniProt_AC=O06798	Is_Pseudogene=No	conserved hypotheticals
RVBD_1769	Rv1769	-2.01777	2.91131e-06	6.29097e-05	34.5253	30.6165	139.523	124.752	82.3542	0.431425	-4.67698		1.94648	6.42717	0.000273124	0.00169034		Rv1769	2002626	2003870	+	Rv1769	Conserved protein	Comments=Rv1769, (MTCY28.35), len: 414 aa. Conserved protein, similar to O88066|SCI35.31|AL031541 hypothetical protein from Streptomyces coelicolor (402 aa), FASTA scores: opt: 1341, E(): 0, (53.8% identity in 398 aa overlap).	UniProt_AC=O06802	Is_Pseudogene=No	conserved hypotheticals		SUBFAMILY NOT MED (PTHR28004:SF7)
RVBD_1770	Rv1770	-2.11075	7.40841e-06	0.000143188	24.4291	25.6133	126.839	90.7286	66.9026	0.470981	-4.4816		2.03815	6.00083	0.000561902	0.00310246		Rv1770	2003878	2005164	+	Rv1770	Conserved protein	Comments=Rv1770, (MTCY28.36), len: 428 aa. Conserved protein, highly similar in N-terminus to Q49882 Hypothetical protein from Mycobacterium leprae from cosmid L247 (83 aa), FASTA scores: opt: 301, E(): 1e-12, (56.5% identity in 85 aa overlap).	UniProt_AC=O06803	Is_Pseudogene=No	conserved hypotheticals		ALKALINE PHOSPHATASE ISOZYME CONVERSION PROTEIN (PTHR12147:SF41)
RVBD_1774	Rv1774	-2.11196	0.000328676	0.00329529	14.333	18.818	63.4196	79.3876	43.9895	0.588032	-3.59158		2.03707	5.26869	0.00438567	0.0166755		Rv1774	2007832	2009172	+	Rv1774	Probable oxidoreductase	Comments=Rv1774, (MTCY25C11.01), len: 446 aa. Probable oxidoreductase, similar to several e.g. HDNO_ARTOX|P08159 6-hydroxy-d-nicotine oxidase (458 aa), FASTA scores: opt: 417, E(): 6e-20, (28.4% identity in 462 aa overlap). Also some similarity to Mycobacterium tuberculosis oxidoreductase MTCY04C12.11 (24.1% identity in 444 aa overlap). Contains PS00862 Oxygen oxidoreductases covalent FAD-binding…	UniProt_AC=O33177	Is_Pseudogene=No	intermediary metabolism and respiration
RVBD_1775	Rv1775	-1.92355	0.00463986	0.0246859	11.8991	13.3667	50.7357	45.3643	30.3414	0.679453	-2.83103							Rv1775	2009172	2009990	+	Rv1775	Conserved hypothetical protein	Comments=Rv1775, (MTCY25C11.02), unknown, len: 272 aa. Conserved hypothetical protein, similar to O28806|AF1466 conserved hypothetical protein from Archaeoglobus fulgidus (255 aa), FASTA scores: opt: 364, E(): 1e-17, (29.2% identity in 267 aa overlap).	UniProt_AC=O33178	Is_Pseudogene=No	conserved hypotheticals
RVBD_1776c	Rv1776c	-2.58734	0.00108899	0.00853287	6.21996	5.74993	38.0518	34.0232	21.0112	0.792091	-3.26647		2.51223	3.70247	0.0168134	0.049892		Rv1776c	2009995	2010555	-	Rv1776c	Possible transcriptional regulatory protein	Comments=Rv1776c, (MTCY25C11.03c), len: 186 aa. Possible regulatory protein, some similarity to Mycobacterium tuberculosis Rv1255c|Q11063 hypothetical transcriptional regulator (202 aa), FASTA scores: opt: 270, E(): 9.7e-09, (28.3% identity in 191 aa overlap). Contains possible helix-turn-helix motif at aa 37-58 (+3.49 SD).	UniProt_AC=O33179	Is_Pseudogene=No	regulatory proteins
RVBD_1777	Rv1777	-2.15819	4.20263e-06	8.65144e-05	23.3474	27.7042	126.839	102.07	69.9901	0.46906	-4.6011		2.08442	6.06569	0.000318812	0.00192462		Rv1777	2010656	2011960	+	cyp144	Probable cytochrome P450 144 Cyp144	Comments=Rv1777, (MT1827, MTCY25C11.04), len: 434 aa. Probable cyp144, cytochrome p450, similar to CPXM_BACME|Q06069 cytochrome p450 (meg) (410 aa), FASTA scores: opt: 435 E(): 2.3e-16, (28.8% identity in 372 aa overlap). Also similar to several other Mycobacterium tuberculosis p450 genes including Rv0766c, Rv2266, etc. Contains PS00086 Cytochrome P450 cysteine heme-iron ligand signature. Belongs…	UniProt_AC=O33180	Is_Pseudogene=No	intermediary metabolism and respiration
RVBD_1778c	Rv1778c	-2.57991	0.00509522	0.026145	3.69592	6.34733	38.0518	22.6822	17.6943	0.921085	-2.80095							Rv1778c	2012081	2012530	-	Rv1778c	Unknown protein	Comments=Rv1778c, (MTCY25C11.05c), len: 149 aa. Unknown protein.	UniProt_AC=O33181	Is_Pseudogene=No	conserved hypotheticals
RVBD_1787	Rv1787	-1.22255	5.2754e-05	0.000733645	138.462	127.619	266.362	351.573	221.004	0.30238	-4.04308		1.15068	8.33305	0.00161404	0.00752503		Rv1787	2025301	2026398	+	PPE25	PPE family protein PPE25	Comments=Rv1787, (MTV049.09), len: 365 aa. PPE25, Member of the Mycobacterium tuberculosis PPE family of glycine-rich proteins, similar to Z74024|MTCY274.24 Mycobacterium tuberculosis cosmid (404 aa), FASTA scores: opt: 837, E(): 0, (52.0% identity in 406 aa overlap).	UniProt_AC=Q79FK8	Is_Pseudogene=No	PE/PPE
RVBD_1790	Rv1790	-1.1317	0.000159789	0.00184686	153.696	150.992	266.362	396.938	241.997	0.299761	-3.77534		1.05895	8.49275	0.00365889	0.0144532		Rv1790	2028425	2029477	+	PPE27	PPE family protein PPE27	Comments=Rv1790, (MTV049.12), len: 350 aa. PPE27, Member of the Mycobacterium tuberculosis PPE family of glycine-rich protein, similar to Z74024|MTCY274.24 Mycobacterium tuberculosis cosmid (404 aa), FASTA scores: opt: 849, E(): 0, (50.0% identity in 406 aa overlap).	UniProt_AC=Q79FK5	Is_Pseudogene=No	PE/PPE
RVBD_1791	Rv1791	-4.22084	3.26613e-23	2.41763e-21	11.9892	19.6394	355.15	238.163	156.235	0.425306	-9.92423		4.14094	7.12254	1.39817e-19	8.58824e-18		Rv1791	2029904	2030203	+	PE19	PE family protein PE19	Comments=Rv1791, (MTV049.13), len: 99 aa. PE19, Member of the Mycobacterium tuberculosis PE family, but no glycine rich C-terminus (see Brennan & Delogu 2002), highly similar to Z93777|MTCI364.07 M.tuberculosis cosmid (99 aa) opt: 430 E(): 2.4e-21, (75.5% identity in 98 aa overlap).	UniProt_AC=Q79FK4	Is_Pseudogene=No	PE/PPE
RVBD_1803c	Rv1803c	-3.7754	4.05898e-26	3.5303e-24	36.5986	23.8958	431.253	396.938	222.171	0.357145	-10.5711		3.70613	7.95835	1.28549e-21	8.3117e-20		Rv1803c	2044923	2046842	-	PE_PGRS32	PE-PGRS family protein PE_PGRS32	Comments=Rv1803c, (MTV049.25c), len: 639 aa. PE_PGRS32, Member of the Mycobacterium tuberculosis PE family, PGRS subfamily of gly-rich proteins (see citation below). Most similar to Rv1768|MTCY28.34|Z95890 (618 aa), FASTA scores: opt: 1827, E(): 0, (53.5% identity in 664 aa overlap). Contains two PS00583 pfkB family of carbohydrate kinases signatures 1. Predicted to be an outer membrane protein (…	UniProt_AC=Q79FJ9	Is_Pseudogene=No	PE/PPE
RVBD_1813c	Rv1813c	-2.31585	9.71497e-05	0.00121141	12.5301	16.4284	88.7875	56.7054	43.6128	0.594173	-3.8976		2.23971	5.11339	0.0018258	0.00826514		Rv1813c	2055681	2056112	-	Rv1813c	Conserved hypothetical protein	Comments=Rv1813c, (MTCY16F9.01), len: 143 aa. Conserved hypothetical protein. Possibly a exported protein with potential N-termil sigl sequence. Similar to Q11050|Rv1269c|MTCY50.13 hypothetical protein from Mycobacterium tuberculosis (124 aa), (42.7% identity in 143 aa overlap). Predicted to be an outer membrane protein (See Song et al., 2008). Predicted possible vaccine candidate (See Zvi et al.…	UniProt_AC=P64889	Is_Pseudogene=No	conserved hypotheticals
RVBD_1831	Rv1831	-2.33798	3.29383e-06	6.98734e-05	21.8149	23.5971	164.891	68.0465	69.5874	0.50262	-4.65159		2.26419	5.94927	0.000172662	0.0011528		Rv1831	2075571	2075828	+	Rv1831	Hypothetical protein	Comments=Rv1831, (MTCY1A11.12c), len: 85 aa. Hypothetical unknown protein.	UniProt_AC=P64899	Is_Pseudogene=No	conserved hypotheticals
RVBD_1851	Rv1851	-3.3822	1.25969e-05	0.0002259	3.87621	4.10709	25.3678	56.7054	22.5141	0.774493	-4.36699		3.3023	3.27294	0.00166852	0.00764841		Rv1851	2099694	2100329	+	ureF	Urease accessory protein UreF	Comments=Rv1851, (MTCY359.22c), len: 211 aa. UreF, urease accessory protein. Identical to UREF_MYCTU|P50050 from M. tuberculosis.	UniProt_AC=P50050	Is_Pseudogene=No	intermediary metabolism and respiration
RVBD_1864c	Rv1864c	-1.86687	0.000648238	0.00570942	21.4544	21.4316	101.471	56.7054	50.2657	0.547375	-3.41058		1.79409	5.6095	0.00780506	0.0266972		Rv1864c	2111354	2112109	-	Rv1864c	Conserved protein	Comments=Rv1864c, (MTCY359.09), len: 251 aa. Conserved protein. Similar to other hypothetical proteins e.g. AL031317|SC6G4.43 from Streptomyces coelicolor cosmid 6G (233 aa), FASTA scores: opt: 716, E(): 0, (54.4% identity in 215 aa overlap)	UniProt_AC=P95151	Is_Pseudogene=No	conserved hypotheticals		PROTEIN YIIM (PTHR30212:SF2)	attenuated in primates (https://doi.org/10.1086/652497)
RVBD_1871c	Rv1871c	-1.96289	0.00147269	0.0106739	14.7837	19.1913	88.7875	45.3643	42.0317	0.617257	-3.18001		1.88626	5.24978	0.00909917	0.0302936		Rv1871c	2121495	2121884	-	Rv1871c	Conserved protein	Comments=Rv1871c, (MTCY359.02), len: 129 aa. Conserved protein, similar to Mycobacterium tuberculosis hypothetical proteins Q11057|Rv1261|MTCY50.21 (149 aa), FASTA score: opt: 125, E(): 0.019, (32.6% identity in 89 aa overlap)	UniProt_AC=P95144	Is_Pseudogene=No	conserved hypotheticals
RVBD_1881c	Rv1881c	-1.23527	0.00762458	0.0344507	50.3907	72.2848	177.575	113.411	103.415	0.46295	-2.66826		1.15859	7.09699	0.0151986	0.045957		Rv1881c	2131907	2132329	-	lppE	Possible conserved lipoprotein LppE	Comments=Rv1881c, (MTCY180.37), len: 140 aa. Possible lppE, lipoprotein, showing some similarity to L12238|MSG18S19K_1 19K antigen from Mycobacterium intracellulare (162 aa), FASTA scores: opt: 137, E(): 0.0069, (27.6% identity in 156 aa overlap). Contains signal sequence and appropriately positioned PS00013 Prokaryotic membrane lipoprotein lipid attachment site.	UniProt_AC=O07750	Is_Pseudogene=No	cell wall and cell processes			hydrolase(PC00121)
RVBD_1889c	Rv1889c	-4.36162	1.42367e-10	5.5651e-09	3.06491	6.34733	139.523	56.7054	51.4102	0.680085	-6.41334		4.2785	4.12816	5.09192e-07	7.64691e-06		Rv1889c	2138661	2139017	-	Rv1889c	Conserved hypothetical protein	Comments=Rv1889c, (MTCY180.29), len: 118 aa. Conserved hypothetical protein. Part of large family of Mycobacterium tuberculosis proteins with conserved N-termil domain of ~120 aa. Includes: Rv3399|Q50726|MTCY78.29C conserved hypothetical protein (348 aa), FASTA results: opt: 504, E(): 7.3e-29, (64.2% identity in 120 aa overlap)	UniProt_AC=O07743	Is_Pseudogene=No	conserved hypotheticals		SUBFAMILY NOT MED (PTHR43619:SF3)
RVBD_1892	Rv1892	-2.80852	4.98624e-08	1.34863e-06	13.4315	20.7595	126.839	113.411	68.6103	0.515155	-5.4518		2.7316	5.7144	6.73619e-06	7.01306e-05		Rv1892	2140165	2140476	+	Rv1892	Probable membrane protein	Comments=Rv1892, (MTCY180.26c), len: 103 aa. Probable membrane protein.	UniProt_AC=O07740	Is_Pseudogene=No	cell wall and cell processes
RVBD_1900c	Rv1900c	-2.00405	1.08144e-06	2.44307e-05	39.8438	34.9476	164.891	136.093	93.9439	0.410985	-4.87621		1.93301	6.66955	0.000119079	0.000850512		Rv1900c	2146245	2147633	-	lipJ	Probable lignin peroxidase LipJ	Comments=Rv1900c, (MTCY180.18), len: 462 aa. Probable lipJ, lignin peroxidase, with some similarity to esterases, hydrolases and hypothetical Mycobacterium tuberculosis proteins e.g. Q43936 beta-ketoadipate enol-lactone hydrolase from Acinetobacter calcoaceticus (267 aa), FASTA results: opt: 217, E(): 1.7e-07, (29.2% identity in 260 aa overlap). Also similar to other Mycobacterium tuberculosis hy…	UniProt_AC=O07732	Is_Pseudogene=No	intermediary metabolism and respiration
RVBD_1901	Rv1901	-2.24491	1.09197e-09	3.83734e-08	77.1636	129.784	481.989	499.007	296.986	0.368299	-6.09535		2.16875	8.66454	1.58412e-09	4.42294e-08		Rv1901	2147662	2148954	+	cinA	Probable CinA-like protein CinA	Comments=Rv1901, (MTCY180.17c), len: 430 aa. Probable cinA-like protein, strong similarity to competence damage proteins CinA of Bacillus subtilis and S. pneumoniae. FASTA results: Q55760 hypothetical 44.7 kDa protein (416 aa) opt: 755, E(): 0, (36.0% identity in 433 aa overlap).	UniProt_AC=P63775	Is_Pseudogene=No	virulence, detoxification, adaptation			nicotinamide mononucleotide deamidase and ADP-ribose pyrophosphatase activities;function as an enzyme participating in the pyridine nucleotide cycle, which recycles products formed by non-redox uses of NAD.(https://doi.org/10.1038/s41467-022-29832-1)
RVBD_1924c	Rv1924c	-1.6621	0.000604652	0.00543562	32.7224	46.3728	101.471	147.434	82.0002	0.484647	-3.42952		1.58785	6.57742	0.00276195	0.0114824		Rv1924c	2176550	2176930	-	Rv1924c	Unknown protein	Comments=Rv1924c, (MTCY09F9.40), len: 126 aa. Unknown protein.	UniProt_AC=P95289	Is_Pseudogene=No	conserved hypotheticals
RVBD_1940	Rv1940	-1.62256	0.0122556	0.0490083	19.381	15.607	50.7357	56.7054	35.6073	0.647808	-2.5047							Rv1940	2192606	2193667	+	ribA1	Probable riboflavin biosynthesis protein RibA1 (GTP cyclohydrolase II)	Comments=Rv1940, (MTCY09F9.24c), len: 353 aa. Probable ribA1, Riboflavin biosynthesis protein, similar to GCH2_BACSU|P17620 gtp cyclohydrolase II (398 aa), FASTA scores: opt: 682, E(): 0, (37.7% identity in 363 aa overlap), also similar to Rv1415|MTCY21B4.33|ribA2 (428 aa) (45.4% identity in 368 aa overlap). Note that previously known as ribA.	UniProt_AC=Q7D7R0	Is_Pseudogene=No	intermediary metabolism and respiration			1042
RVBD_1954c	Rv1954c	-2.61158	0.00731583	0.0336219	5.94953	7.39277	0	79.3876	23.1825	0.973701	-2.68212							Rv1954c	2201223	2201744	-	Rv1954c	Hypothetical protein	Comments=Rv1954c, (MTCY09F9.10), len: 173 aa. Hypothetical unknown protein, end overlaps next ORF upstream, Rv1955 (MTCY09F9.09c).	UniProt_AC=P95260	Is_Pseudogene=No	conserved hypotheticals
RVBD_1955	Rv1955	-3.88436	4.15932e-08	1.13939e-06	3.06491	6.64602	76.1035	68.0465	38.4652	0.708314	-5.48395		3.802	3.85757	3.35882e-05	0.000281659		Rv1955	2201719	2202096	+	higB	Possible toxin HigB	Comments=Rv1955, (MTCY09F9.09c), len: 125 aa. Possible higB, toxin, part of toxin-antitoxin (TA) operon with Rv1956 (See Pandey and Gerdes, 2005	UniProt_AC=P95259	Is_Pseudogene=No	virulence, detoxification, adaptation
RVBD_1957	Rv1957	-2.23372	0.00300363	0.0185277	9.10458	15.9803	25.3678	90.7286	35.2953	0.752761	-2.96737		2.16006	4.84051	0.0091127	0.0302976		Rv1957	2202584	2203129	+	Rv1957	Hypothetical protein	Comments=Rv1957, (MTCY09F9.07c), len: 181 aa. Hypothetical unknown protein.	UniProt_AC=P95257	Is_Pseudogene=No	conserved hypotheticals			Rv1957 has recently been identified as a Sec-B like chaperone required for antitoxin stabilization (Bordes et al., 2011).Together these data demonstrate that higB expression in the absence of antitoxin and Rv1957c chaperone arrests growth and causes substantial cell death in M. tuberculosis.(doi:10.1111/mmi.12358)
RVBD_1971	Rv1971	-1.27738	3.1093e-05	0.000466262	112.049	110.219	266.362	272.186	190.204	0.306672	-4.16531		1.20566	8.07986	0.00130992	0.0063481		Rv1971	2215257	2216570	+	mce3F	Mce-family protein Mce3F	Comments=Rv1971, (MTV051.09), len: 437 aa. Mce3F	UniProt_AC=O53972	Is_Pseudogene=No	virulence, detoxification, adaptation
RVBD_1975	Rv1975	-1.59733	0.00211934	0.0143169	31.4604	27.6295	63.4196	113.411	58.9801	0.519799	-3.07298		1.52644	6.04586	0.0117836	0.0373579		Rv1975	2218052	2218717	+	Rv1975	Conserved hypothetical protein	Comments=Rv1975, (MTV051.13), len: 221 aa. Conserved hypothetical protein, showing some similarity to AJ251435 hypothetical protein from Mycobacterium avium subsp. paratuberculosis (193 aa). Predicted to be an outer membrane protein (See Song et al., 2008).	UniProt_AC=O53976	Is_Pseudogene=No	conserved hypotheticals		SUBFAMILY NOT MED (PTHR31157:SF24)
RVBD_1994c	Rv1994c	-3.79751	1.8565e-09	6.39482e-08	5.04808	9.70768	139.523	68.0465	55.5814	0.631876	-6.00989		3.71535	4.67327	8.11187e-07	1.14545e-05		Rv1994c	2237628	2237984	-	cmtR	Metal sensor transcriptional regulator CmtR (ArsR-SmtB family)	Comments=Rv1994c, (MTCY39.25), len: 118 aa. CmtR, transcriptional regulator (See Cavet et al., 2003). Similar to MERR_STRLI|P30346 probable mercury resistance operon repressor (125 aa), FASTA scores: opt: 199, E(): 3e-08, (36.3% identity in 102 aa overlap). Note that primer extension analysis revealed two transcriptional start sites (See Chauhan et al., 2009).	UniProt_AC=P67731	Is_Pseudogene=No	regulatory proteins
RVBD_1999c	Rv1999c	-3.25551	6.5895e-16	3.47347e-14	34.2549	56.7526	532.725	340.232	240.991	0.403015	-8.07789		3.17654	8.16499	4.65258e-16	2.43221e-14		Rv1999c	2243816	2245138	-	Rv1999c	Probable conserved integral membrane protein	Comments=Rv1999c, (MTCY39.19), len: 440 aa. Probable conserved integral membrane protein, possibly transporter of cationic amino acid, similar to many transporters, especially amino acid transporters, e.g. CAC08265.1|AL392146 putative amino acid transporter from Streptomyces coelicolor (414 aa)	UniProt_AC=P63349	Is_Pseudogene=No	cell wall and cell processes
RVBD_2038c	Rv2038c	-3.05716	0.0066225	0.031626	2.25361	2.09088	25.3678	11.3411	10.2634	1.12592	-2.71525							Rv2038c	2283723	2284796	-	Rv2038c	Probable sugar-transport ATP-binding protein ABC transporter	Comments=Rv2038c, (MTV018.25c), len: 357 aa. Probable sugar-transport ATP-binding protein ABC transporter (see citation below), similar to many. Contains PS00211 ABC transporters family signature and PS00017 ATP/GTP-binding site motif A (P-loop).	UniProt_AC=O53482	Is_Pseudogene=No	cell wall and cell processes			carbohydrate uptake transporters (https://doi.org/10.1186/s12864-021-07972-w)
RVBD_2069	Rv2069	-3.57312	7.81597e-14	3.67456e-12	10.0962	9.03561	114.155	113.411	61.6745	0.478113	-7.47338		3.49916	5.0699	1.22568e-07	2.26429e-06		Rv2069	2326944	2327501	+	sigC	RNA polymerase sigma factor, ECF subfamily, SigC	Comments=Rv2069, (MTCY49.08), len: 185 aa. SigC, RNA polymerase sigma factor, ECF subfamily (see Gomez et al., 1997	UniProt_AC=P66809	Is_Pseudogene=No	information pathways
RVBD_2087	Rv2087	-2.55741	8.78068e-05	0.00111084	9.19472	17.1004	63.4196	90.7286	45.1109	0.652063	-3.92203		2.47988	5.05717	0.000627262	0.00340217		Rv2087	2343994	2344224	+	Rv2087	Conserved hypothetical protein	Comments=Rv2087, (MTCY49.27), len: 76 aa. Conserved hypothetical protein, similar to but shorter than transposases, but we can find no sequence errors to account for the frameshifts. Start changed since first submission (-45 aa). This region is a possible MT-complex-specific genomic island (See Becq et al., 2007).	UniProt_AC=Q10696	Is_Pseudogene=No	insertion seqs and phages
RVBD_2129c	Rv2129c	-2.29942	0.00475727	0.0246859	8.65386	5.97395	38.0518	34.0232	21.6757	0.814523	-2.82303							Rv2129c	2390308	2391189	-	Rv2129c	Probable oxidoreductase	Comments=Rv2129c, (MTCY261.28), len: 293 aa. Probable oxidoreductase, similar to many e.g. FABG_SYNY3|P73826 3-oxoacyl-[acyl-carrier protein] reductase (240 aa), FASTA scores: opt: 241, E(): 5.1e-17, (32.7% identity in 196 aa overlap)	UniProt_AC=O33263	Is_Pseudogene=No	intermediary metabolism and respiration
RVBD_2174	Rv2174	-2.81754	0.0024988	0.0162189	3.06491	5.45123	38.0518	22.6822	17.3125	0.931884	-3.02349							Rv2174	2435909	2437459	+	mptA	Alpha(1->6)mannosyltransferase. Possible conserved integral membrane protein.	Comments=Rv2174, (MTV021.07), len: 516 aa. MptA (mannopyranosyltransferase A) (See Mishra et al., 2007). Possible conserved integral membrane protein, similar to some hypothetical mycobacterial proteins e.g. Mycobacterium leprae ML0899 probable integral-membrane protein (505 aa) and MLCL536_26 (593 aa). FASTA scores: ML0899 opt: 2715	UniProt_AC=O53508	Is_Pseudogene=No	cell wall and cell processes			Lipoarabinomannan (LAM) synthesis;https://doi.org/10.1074/jbc.M703389200
RVBD_2175c	Rv2175c	-2.94568	1.88413e-05	0.000310659	6.49039	9.18495	88.7875	34.0232	34.6215	0.688534	-4.2782		2.86817	4.27814	0.00102819	0.00521609		Rv2175c	2437446	2437886	-	Rv2175c	Conserved regulatory protein	Comments=Rv2175c, (MTV021.08c), len: 146 aa. Conserved protein, possibly involved in regulation. Contains possible helix-turn-helix domain at aa 31-52 (Score 1042, +2.74 SD). Equivalent to Mycobacterium leprae ML0898 putative DNA-binding protein (134 aa). FASTA scores: opt: 747	UniProt_AC=O53509	Is_Pseudogene=No	regulatory proteins
RVBD_2181	Rv2181	-1.7408	3.9103e-05	0.000569203	44.2609	63.3239	190.259	170.116	116.99	0.423273	-4.11272		1.66537	7.1534	0.000219955	0.00141105		Rv2181	2443302	2444585	+	Rv2181	Alpha(1->2)mannosyltransferase	Comments=Rv2181, (MTV021.14), len: 427 aa. Alpha(1->2)mannosyltransferase (See Kaur et al., 2006). Probable integral membrane protein, similar to others in Mycobacterium tuberculosis e.g. Rv1159 (MTCI65.26, 431 aa). Start uncertain. FASTA scores: Z95584|MTCI65_26 (431 aa) opt: 428, E(): 8e-22	UniProt_AC=O53515	Is_Pseudogene=No	cell wall and cell processes			Lipoarabinomannan (LAM) synthesis (https://doi.org/10.1073/pnas.0603049103)
RVBD_2184c	Rv2184c	-2.47454	7.16028e-07	1.67185e-05	17.9387	16.5777	101.471	90.7286	56.6791	0.499205	-4.95697		2.40215	5.51242	0.000196148	0.00128117		Rv2184c	2445807	2446946	-	Rv2184c	Conserved hypothetical protein	Comments=Rv2184c, (MTV021.17c), len: 379 aa. Conserved hypothetical protein, equivalent to hypothetical protein ML0890 (415 aa) from Mycobacterium leprae and also shows some similarity to other hypothetical proteins. FASTA scores: ML0890 opt: 1949	UniProt_AC=O53518	Is_Pseudogene=No	conserved hypotheticals		ANION-TRANSPORTING ATPASE-RELATED (PTHR10803:SF0)
RVBD_2190Ac	Rv2190Ac	-2.08254	0.00304551	0.0186866	15.3245	10.0064	38.0518	68.0465	32.8573	0.702824	-2.96311		2.01426	4.79066	0.013584	0.0420352
RVBD_2200c	Rv2200c	-2.40761	0.00617936	0.0301092	6.49039	4.85384	38.0518	22.6822	18.0195	0.879295	-2.73811							Rv2200c	2463660	2464751	-	ctaC	Probable transmembrane cytochrome C oxidase (subunit II) CtaC	Comments=Rv2200c, (MTCY190.11c), len: 363 aa. Probable ctaC, transmembrane cytochrome C oxidase (subunit II), COX2, similar e.g. to JT0964 cytochrome-c oxidase chain II (23.0% identity in 317 aa overlap)	UniProt_AC=P63854	Is_Pseudogene=No	intermediary metabolism and respiration
RVBD_2201	Rv2201	-2.63082	0.00463052	0.0246859	5.76924	4.03242	50.7357	11.3411	17.9696	0.929071	-2.83167							Rv2201	2464997	2466955	+	asnB	Probable asparagine synthetase AsnB	Comments=Rv2201, (MTCY190.12), len: 652 aa. Probable asnB, asparagine synthetase, similar to e.g. SW:ASNH_BACSU P42113 putative asparagine synthetase (26.0% identity in 438 aa overlap)	UniProt_AC=P64247	Is_Pseudogene=No	intermediary metabolism and respiration
RVBD_2218	Rv2218	-4.06893	1.35709e-07	3.42125e-06	2.52404	2.46426	38.0518	45.3643	22.1011	0.771953	-5.27096		3.98585	2.72667	0.000363216	0.00215573		Rv2218	2485273	2486208	+	lipA	Probable lipoate biosynthesis protein A LipA	Comments=Rv2218, (MTCY190.29), len: 311 aa. Probable lipA, lipoic acid synthetase, similar to e.g. SW:LIPA_HAEIN P44463 (42.6% identity in 291 aa overlap). Equivalent to Z98741|MLCB2 2_12 Mycobacterium leprae cosmid B22	UniProt_AC=P65283	Is_Pseudogene=No	intermediary metabolism and respiration
RVBD_2225	Rv2225	-3.71508	0.0113525	0.0461396	0.811299	1.04544	25.3678	0	6.80615	1.46745	-2.53166							Rv2225	2497742	2498587	+	panB	3-methyl-2-oxobutanoate hydroxymethyltransferase PanB	Comments=Rv2225, (MTCY427.06), len: 281 aa. panB, 3-methyl-2-oxobutanoate hydroxymethyltransferase, similar to PANB_ECOLI|P31057 3-methyl-2-oxobutanoate hydroxymethyltransferase from Escherichia coli (45.9% identity in 257 aa overlap). Identified as a substrate for proteasomal degradation (See Pearce et al., 2006).	UniProt_AC=P0A5Q8	Is_Pseudogene=No	intermediary metabolism and respiration
RVBD_2249c	Rv2249c	-2.71221	3.48411e-05	0.000515796	8.29328	8.13951	50.7357	56.7054	30.9685	0.655239	-4.13927		2.63747	4.27009	0.00283447	0.0116655		Rv2249c	2523241	2524791	-	glpD1	Probable glycerol-3-phosphate dehydrogenase GlpD1	Comments=Rv2249c, (MTCY427.31c), len: 516 aa. Probable glpD1, glycerol-3-phosphate dehydrogenase, similar to SW:GLPD_ECOLI P13035 aerobic glycerol-3-phosphate dehydrogenase (30.0% identity in 486 aa overlap) and SW:GLPA_ECOLI P13032 anaerobic glycerol-3-phosphate dehydrogenase (28.2% identity in 504 aa overlap). Also similar to Rv3302c|glpD2 glycerol-3-phosphate dehydrogenase. Cofactor: FAD (by s…	UniProt_AC=P64182	Is_Pseudogene=No	intermediary metabolism and respiration
RVBD_2268c	Rv2268c	-4.02955	1.00909e-09	3.58228e-08	3.33534	6.1233	63.4196	90.7286	40.9017	0.659721	-6.10797		3.94815	3.89892	6.69519e-06	7.00004e-05		Rv2268c	2542807	2544276	-	cyp128	Probable cytochrome P450 128 Cyp128	Comments=Rv2268c, (MT2330, MTCY339.42), len: 489 aa. Probable cyp128, cytochrome P450, similar to (but longer than) cytochrome p-450 e.g. CPXK_SACER P3 3271 cytochrome p-450 107b1 (405 aa), FASTA scores, opt: 620, E(): 8.3e-33, (31.8% identity in 406 aa overlap)	UniProt_AC=P63713	Is_Pseudogene=No	intermediary metabolism and respiration			Cytochromes P450 are a group of heme-thiolate monooxygenases. They oxidize a variety of structurally unrelated compounds, including steroids, fatty acids, and xenobiotics; sulfomenaquinone biosynthesis (https://doi.org/10.1021/acsinfecdis.6b00106)
RVBD_2269c	Rv2269c	-2.98836	0.00109863	0.0085698	3.96635	3.5097	12.6839	45.3643	16.3811	0.915561	-3.26397		2.91175	3.05823	0.0129233	0.040449		Rv2269c	2544289	2544621	-	Rv2269c	Hypothetical protein	Comments=Rv2269c, (MTCY339.41), len: 110 aa. Unknown protein	UniProt_AC=P64965	Is_Pseudogene=No	conserved hypotheticals			Regulation of sulfomenaquinone biosynthesis(https://doi.org/10.1021/acsinfecdis.6b00106)
RVBD_2273	Rv2273	-4.31487	6.0471e-15	3.04897e-13	9.10458	4.85384	164.891	113.411	73.0651	0.552979	-7.80296		4.24319	5.06138	1.1707e-10	3.9403e-09		Rv2273	2546102	2546431	+	Rv2273	Probable conserved transmembrane protein	Comments=Rv2273, (MTCY339.37c), len: 109 aa. Probable conserved transmembrane protein, similar to Rv2272 (MTCY339.38c), (35.0% identity in 100 aa overlap).	UniProt_AC=P64971	Is_Pseudogene=No	cell wall and cell processes
RVBD_2274c	Rv2274c	-5.85854	3.00389e-23	2.27185e-21	1.98318	1.56816	139.523	68.0465	52.7802	0.589831	-9.93258		5.77384	3.28687	8.57012e-10	2.50676e-08		Rv2274c	2546488	2546805	-	mazF8	Possible toxin MazF8	Comments=Rv2274c, (MTCY339.36), len: 105 aa. Possible mazF8, toxin, part of toxin-antitoxin (TA) operon with Rv2274A (See Pandey and Gerdes, 2005). Questionable ORF.	UniProt_AC=Q50689	Is_Pseudogene=No	virulence, detoxification, adaptation
RVBD_2293c	Rv2293c	-3.15694	0.000837693	0.00690601	2.34375	4.33112	25.3678	34.0232	16.5165	0.945182	-3.34003		3.07325	2.93374	0.0165122	0.0494158		Rv2293c	2564292	2565032	-	Rv2293c	Conserved hypothetical protein	Comments=Rv2293c, (MTCY339.17), len: 246 aa. Conserved hypothetical protein	UniProt_AC=Q50673	Is_Pseudogene=No	conserved hypotheticals
RVBD_2321c	Rv2321c	-3.35526	3.8531e-05	0.000563233	2.97476	5.22721	50.7357	34.0232	23.2402	0.815153	-4.11612		3.27344	3.3133	0.00260676	0.010986		Rv2321c	2594154	2594699	-	rocD2	Probable ornithine aminotransferase (C-terminus part) RocD2 (ornithine--oxo-acid aminotransferase)	Comments=Rv2321c, (MTCY3G12.13), len: 181 aa. Probable rocD2, ornithine aminotransferase, highly similar to C-terminal region of other ornithine aminotransferases, e.g. Q9FC90|ROCD from Streptomyces coelicolor (407 aa), FASTA scores: opt: 628, E(): 1.2e-32, (55.35% identity in 168 aa overlap)	UniProt_AC=P71891	Is_Pseudogene=No	intermediary metabolism and respiration			arginine metabolism
RVBD_2340c	Rv2340c	-3.48022	1.99446e-24	1.61366e-22	30.1082	23.6718	317.098	283.527	163.601	0.341217	-10.1994		3.40925	7.36181	6.92707e-16	3.5458e-14		Rv2340c	2617667	2618908	-	PE_PGRS39	PE-PGRS family protein PE_PGRS39	Comments=Rv2340c, (MTCY98.09c), len: 413 aa. PE_PGRS39, Member of the Mycobacterium tuberculosis PE_family, PGRS subfamily of gly-rich proteins (see citations below), similar to others eg YI18_MYCTU|Q50615|Rv1818c|MTCY1A11.25 PE-PGRS family protein from Mycobacterium tuberculosis (498 aa), FASTA scores: opt: 710, E(): 1.4e-22, (41.0% identity in 368 aa overlap)	UniProt_AC=Q7D7A7	Is_Pseudogene=No	PE/PPE
RVBD_2345	Rv2345	-5.96276	4.8435e-168	2.10632e-165	233.384	235.598	12354.1	16886.9	7427.5	0.215807	-27.6301		5.89148	13.5389	6.11628e-62	1.36615e-59		Rv2345	2623821	2625803	+	Rv2345	Possible conserved transmembrane protein	Comments=Rv2345, (MTCY98.14), len: 660 aa. Possible conserved transmembrane protein, with hydrophobic stretch at N-terminal end around position 180. Similar to O52198 hypothetical 21.2 KDA protein (fragment) from Mycobacterium smegmatis (195 aa), FASTA scores: opt: 589, E(): 1.5e-23	UniProt_AC=P95241	Is_Pseudogene=No	cell wall and cell processes			phosphatase involved in Cell division (https://doi.org/10.1016/j.pep.2015.03.003)
RVBD_2374c	Rv2374c	-6.02182	1.9369e-93	3.96381e-91	15.3245	23.3731	1179.6	1338.25	639.137	0.293674	-20.5051		5.94582	9.81293	4.02214e-55	7.05886e-53		Rv2374c	2654062	2655093	-	hrcA	Probable heat shock protein transcriptional repressor HrcA	Comments=Rv2374c, (MTCY27.06), len: 343 aa. Probable hrcA, heat-inducible transcriptional repressor (see citation below), equivalent to Q9CCN2|HRCA|ML0624 putative heat-inducible transcriptional regulator from Mycobacterium leprae (343 aa), FASTA scores: opt: 1926, E(): 3.9e-107, (89.8% identity in 343 aa overlap). Also highly similar to other heat-inducible transcription repressor proteins e.g. …	UniProt_AC=P64398	Is_Pseudogene=No	virulence, detoxification, adaptation
RVBD_2406c	Rv2406c	-2.84947	3.98122e-07	9.55219e-06	11.6286	13.068	50.7357	124.752	50.0461	0.562041	-5.06985		2.77527	5.09251	7.58076e-05	0.000574874		Rv2406c	2704009	2704437	-	Rv2406c	Conserved protein	Comments=Rv2406c, (MTCY253.14), len: 142 aa. Conserved protein. C-termil region is identical with many CBS domain protein e.g. AAK46774|MT2478 CBS domain protein from Mycobacterium tuberculosis strain CDC1551 (aa 47-142), FASTA scores: opt: 594, E(): 1.9e-30, (98.97% identity in 97 aa overlap)	UniProt_AC=P71737	Is_Pseudogene=No	conserved hypotheticals		SUBFAMILY NOT MED (PTHR43080:SF2)
RVBD_2410c	Rv2410c	-2.01814	0.000790913	0.00659853	14.333	18.1459	63.4196	68.0465	40.9862	0.601361	-3.35596		1.94331	5.19557	0.00679496	0.0240565		Rv2410c	2707333	2708310	-	Rv2410c	Conserved protein	Comments=Rv2410c, (MTCY253.10), len: 325 aa. Conserved protein, equivalent to Q49770|CAC30114|ML0606 conserved hypothetical protein from Mycobacterium leprae (325 aa), FASTA scores: opt: 1928, E(): 3.5e-117, (90.75% identity in 325 aa overlap). Also some similarity with other hypothetical proteins e.g. Q9RST2|DR2041 conserved hypothetical protein from Deinococcus radiodurans (316 aa), FASTA score…	UniProt_AC=P71733	Is_Pseudogene=No	conserved hypotheticals		SUBFAMILY NOT MED (PTHR34595:SF2)
RVBD_2416c	Rv2416c	-2.69956	5.53692e-05	0.000752458	7.84256	8.66223	38.0518	68.0465	30.6508	0.66958	-4.03172		2.62363	4.27642	0.00314032	0.0126695		Rv2416c	2714124	2715332	-	eis	Enhanced intracellular survival protein Eis, GCN5-related N-acetyltransferase	Comments=Rv2416c, (MTCY253.04), len: 402 aa. Eis, enhanced intracellular survival gene (see citations below). Conserved hypothetical protein, contains GNAT (Gcn5-related N-acetyltransferase) domain in N-terminal part, similar to Q9F309|SCC80.10 hypothetical 44.7 KDA protein from Streptomyces coelicolor (413 aa), FASTA scores: opt: 382, E(): 1e-16, (31.45% identity in 407 aa overlap)	UniProt_AC=P71727	Is_Pseudogene=No	virulence, detoxification, adaptation			acetylation status of HupB to remodel the mycobacterial chromosome(https://doi.org/10.1021/acs.biochem.7b01089)
RVBD_2423	Rv2423	-1.61522	3.17539e-07	7.67164e-06	99.6996	102.528	240.995	374.256	204.369	0.315921	-5.11273		1.54238	8.13985	4.44365e-05	0.000359146		Rv2423	2719597	2720643	+	Rv2423	Hypothetical protein	Comments=Rv2423, (MTCY428.24c), len: 348 aa. Hypothetical unknown protein.	UniProt_AC=P71925	Is_Pseudogene=No	conserved hypotheticals
RVBD_2427c	Rv2427c	-2.37882	2.87572e-05	0.000442907	13.6118	13.9641	63.4196	79.3876	42.5958	0.568676	-4.18309		2.30525	5.05317	0.0016513	0.00761207		Rv2427c	2724230	2725477	-	proA	Probable gamma-glutamyl phosphate reductase protein ProA (GPR) (glutamate-5-semialdehyde dehydrogenase) (glutamyl-gamma-semialdehyde dehydrogenase)	Comments=Rv2427c, (MTCY428.20), len: 415 aa. Probable proA, gamma-glutamyl phosphate reductase protein, equivalent to Q9CBZ7|ML1458|PROA [gamma]-glutamyl phosphate reductase from Mycobacterium leprae (409 aa), FASTA scores: opt: 2120, E(): 7.4e-118, (81.9% identity in 409 aa overlap). Also highly similar or similar to other gamma-glutamyl phosphate reductases proteins (GPR) e.g. Q9RDK1|PROA from …	UniProt_AC=P65788	Is_Pseudogene=No	intermediary metabolism and respiration
RVBD_2432c	Rv2432c	-4.54294	1.62292e-05	0.000279511	0.991588	1.04544	12.6839	34.0232	12.186	1.05373	-4.31131		4.44527	1.54197	0.00446428	0.0168491		Rv2432c	2728437	2728847	-	Rv2432c	Hypothetical protein	Comments=Rv2432c, (MTCY428.14), len: 136 aa. Hypothetical unknown protein.	UniProt_AC=P71917	Is_Pseudogene=No	conserved hypotheticals
RVBD_2437	Rv2437	-5.05621	2.70592e-10	9.90936e-09	1.08173	2.16556	76.1035	34.0232	28.3435	0.800698	-6.31475		4.96471	2.45023	6.66359e-06	7.00004e-05		Rv2437	2734376	2734795	+	Rv2437	Conserved transmembrane protein	Comments=Rv2437, (MTCY428.09c), len: 139 aa. Conserved transmembrane protein, with some similarity to conserved hypothetical proteins e.g. O06539|RV1139C|MTCI65.06c from Mycobacterium tuberculosis (166 aa)	UniProt_AC=P71912	Is_Pseudogene=No	cell wall and cell processes
RVBD_2443	Rv2443	-1.70989	0.00079552	0.00662109	32.0012	44.1326	76.1035	170.116	80.5884	0.509752	-3.35435		1.63698	6.53824	0.00289132	0.01184		Rv2443	2740709	2742184	+	dctA	Probable C4-dicarboxylate-transport transmembrane protein DctA	Comments=Rv2443, (MTCY428.03c), len: 491 aa. Probable dctA, C4-dicarboxylate-transport transmembrane protein, similar to other C4-dicarboxylate transport proteins e.g. AAK46817|MT2519 from Mycobacterium tuberculosis strain CDC1551 (491 aa)	UniProt_AC=P71906	Is_Pseudogene=No	cell wall and cell processes			DctA, a C4-dicarboxylate-transport transmembrane protein important for translocation of TCA cycle intermediates e.g. Succinate, fumarate or malate to Mtb. (https://doi.org/10.1371/journal.pone.0135208)
RVBD_2444c	Rv2444c	-6.58698	8.17576e-05	0.00105346	0.180289	0.0746744	12.6839	11.3411	6.06999	1.67217	-3.93919							Rv2444c	2742123	2744984	-	rne	Possible ribonuclease E Rne	Comments=Rv2444c, (MTCY428.02), len: 953 aa. Possible rne, ribonuclease E, highly similar to others e.g. Q9CBZ1|ML1468 possible ribonuclease from Mycobacterium leprae (924 aa), FASTA scores: opt: 3713, E(): 2.4e-174, (74.2% identity in 966 aa overlap)	UniProt_AC=P71905	Is_Pseudogene=No	information pathways			cellular homeostasis (https://doi.org/10.1016/j.isci.2022.104233)
RVBD_2459	Rv2459	-1.95265	0.000115314	0.00138815	22.2657	24.1198	88.7875	90.7286	56.4754	0.506409	-3.85588		1.87948	5.78603	0.00285141	0.011696		Rv2459	2760854	2762380	+	Rv2459	Probable conserved integral membrane transport protein	Comments=Rv2459, (MTV008.15), len: 508 aa. Probable conserved integral membrane transport protein, member of major facilitator superfamily (MFS) possibly involved in drug transport, highly similar to many efflux proteins e.g. Q9RL22|SC5G9.04c putative transmembrane efflux protein from Streptomyces coelicolor (489 aa), FASTA scores: opt: 788, E(): 1.3e-38, (34.45% identity in 412 aa overlap)	UniProt_AC=O53186	Is_Pseudogene=No	cell wall and cell processes			efflux pump jeffA
RVBD_2468Ac	Rv2468Ac	-4.34758	0.000972712	0.00785166	0.63101	2.76295	0	68.0465	17.8601	1.31813	-3.2983		4.26106	2.25313	0.0020864	0.00918653
RVBD_2483c	Rv2483c	-4.961	6.44632e-82	1.20761e-79	19.381	22.4023	608.828	691.806	335.604	0.258774	-19.1712		4.88688	8.69894	1.48708e-39	1.92303e-37		Rv2483c	2789280	2791022	-	plsC	Possible transmembrane phospholipid biosynthesis bifunctional enzyme PlsC: putative L-3-phosphoserine phosphatase (O-phosphoserine phosphohydrolase) (PSP) (pspase) + 1-acyl-SN-glycerol-3-phosphate acyltransferase (1-AGP acyltransferase) (1-AGPAT) (lysophosphatidic acid acyltransferase) (LPAAT)	Comments=Rv2483c, (MTV008.39c), len: 580 aa. Possible plsC, a transmembrane phospholipid biosynthesis bifunctional enzyme, including L-3-phosphoserine phosphatase and 1-acyl-Sn-glycerol-3-phosphate acyltransferase , equivalent to Q9X7A9|PLSC|ML1245 putative acyltransferase from Mycobacterium leprae (579 aa), FASTA scores: opt: 2835, E(): 9.2e-153, (77.15% identity in 573 aa overlap). C-terminal e…	UniProt_AC=O53208	Is_Pseudogene=No	lipid metabolism
RVBD_2496c	Rv2496c												6.4669	0.499266	0.00320324	0.0128811		Rv2496c	2809936	2810982	-	bkdB	Probable branched-chain keto acid dehydrogenase E1 component, beta subunit BkdB	Comments=Rv2496c, (MTCY07A7.02c), len: 348 aa. Probable bkdB, branched-chain keto acid dehydrogenase E1 component, beta subunit, similar to others e.g. Q9Y8I6||PDHB from Halobacterium volcanii (Haloferax volcanii) (327 aa) FASTA scores: opt: 1050, E(): 6.4e-60, (49.7% identity in 324 aa overlap)	UniProt_AC=O06160	Is_Pseudogene=No	intermediary metabolism and respiration
RVBD_2510c	Rv2510c	-2.05037	0.00593244	0.0294002	10.637	9.48365	25.3678	56.7054	25.5485	0.745185	-2.75149							Rv2510c	2825488	2827089	-	Rv2510c	Conserved protein	Comments=Rv2510c, (MTCY07A7.16c), len: 533 aa. Conserved protein, highly similar, but longer approximately 20 aa, to others e.g. Q9ABY0|CC0090 hypothetical protein from Caulobacter crescentus (516 aa), FASTA scores: opt: 1282, E(): 8.4e-63, (45.1% identity in 490 aa overlap)	UniProt_AC=O06173	Is_Pseudogene=No	conserved hypotheticals		SUBFAMILY NOT MED (PTHR30121:SF6)
RVBD_2525c	Rv2525c	-1.85947	0.00112389	0.00871416	24.339	18.818	101.471	56.7054	50.3334	0.570824	-3.25752		1.78806	5.61443	0.00756967	0.0261217		Rv2525c	2849852	2850574	-	Rv2525c	Conserved hypothetical protein. Secreted	Comments=Rv2525c, (MTCY159.31), len: 240 aa. Conserved hypothetical protein, equivalent to Q9X7E1|ML1190|MLCB458.05 hypothetical 25.3 KDA protein from Mycobacterium leprae (239 aa), FASTA scores: opt: 1358, E(): 1e-75, (82.15% identity in 241 aa overlap). A core mycobacterial gene	UniProt_AC=P95028	Is_Pseudogene=No	conserved hypotheticals			May function as a peptidoglycan hydrolase with glycosidase activity (PubMed:25260828).
RVBD_2530A	Rv2530A	-5.96929	4.25765e-05	0.000609562	0.180289	0.373372	0	34.0232	8.64422	1.4584	-4.09303							Rv2530A	2854683	2854907	-	vapB39	Possible antitoxin VapB39	Comments=Rv2530A, len: 74 aa. Possible vapB39, antitoxin, part of toxin-antitoxin (TA) operon with Rv2530c, see Arcus et al. 2005. Similar to others in Mycobacterium tuberculosis e.g. O53218|Rv2493 (73 aa), FASTA scores: opt: 240, E(): 5.7e-11, (56.75% identity in 74 aa overlap)	UniProt_AC=Q8VJG5	Is_Pseudogene=No	virulence, detoxification, adaptation
RVBD_2547	Rv2547	-2.59935	0.000470399	0.00450832	6.40025	7.46744	50.7357	34.0232	24.6567	0.743294	-3.49707		2.52359	3.94754	0.0125683	0.0394888		Rv2547	2868606	2868863	+	vapB19	Possible antitoxin VapB19	Comments=Rv2547, (MTCY159.09c), len: 85 aa. Possible vapB19, antitoxin, part of toxin-antitoxin (TA) operon with Rv2548 (See Arcus et al., 2005	UniProt_AC=P95006	Is_Pseudogene=No	virulence, detoxification, adaptation
RVBD_2551c	Rv2551c	-3.38716	0.000135165	0.00158865	5.49881	2.46426	25.3678	56.7054	22.5091	0.887423	-3.81685		3.3165	3.2569	0.00197947	0.00879487		Rv2551c	2870775	2871194	-	Rv2551c	Conserved hypothetical protein	Comments=Rv2551c, (MTCY159.05), len: 139 aa. Conserved hypothetical protein, similar to the second part of Q9XAP1|SC10A7.34c putative type IV peptidase from Streptomyces coelicolor (259 aa), FASTA scores: opt: 243, E(): 7.4e-08, (40.95% identity in 144 aa overlap). Also some similarity with other proteins e.g. AAK58497|GSPO GSPO protein from Acetobacter diazotrophicus (261 aa), FASTA scores: opt:…	UniProt_AC=P95002	Is_Pseudogene=No	conserved hypotheticals		LEADER PEPTIDASE PPPA-RELATED (PTHR30487:SF0)
RVBD_2553c	Rv2553c	-4.11033	0.0119396	0.048088	0.180289	1.19479	12.6839	11.3411	6.35002	1.63503	-2.51392							Rv2553c	2872012	2873265	-	Rv2553c	Probable conserved membrane protein	Comments=Rv2553c, (MTCY159.03), len: 417 aa. Probable conserved membrane protein, equivalent to Q9CCS8|ML0514 putative membrane protein from Mycobacterium leprae (421 aa), FASTA scores: opt: 1955, E(): 1.1e-111, (72.7% identity in 414 aa overlap). Also similar in part to various proteins e.g. Q9L9G6|NOVB NOVB protein (aminodesoxychorismate lyase) from Streptomyces sphaeroides (284 aa), FASTA scor…	UniProt_AC=P95000	Is_Pseudogene=No	cell wall and cell processes			Cell division; putative transglycosylase (https://doi.org/10.3389/fmicb.2021.626461)
RVBD_2561	Rv2561	-2.06247	0.00842146	0.0369461	8.02285	9.18495	38.0518	34.0232	22.3207	0.782815	-2.63469							Rv2561	2881409	2881702	+	Rv2561	Conserved hypothetical protein	Comments=Rv2561, (MTCY9C4.07c), len: 97 aa. Conserved hypothetical protein, highly similar in part (and longer 33 aa) to upstream ORF AAK46951|RV2562|MT2638|MTCY9C4.06c conserved hypothetical protein from Mycobacterium tuberculosis (212 aa), FASTA scores: opt: 205, E(): 2e-06, (76.1% identity in 46 aa overlap).	UniProt_AC=Q50737	Is_Pseudogene=No	conserved hypotheticals
RVBD_2586c	Rv2586c	-3.80439	6.65981e-08	1.75526e-06	4.32693	3.36035	38.0518	68.0465	28.4464	0.704502	-5.40012		3.72515	3.36228	0.00026795	0.00166251		Rv2586c	2912683	2914011	-	secF	Probable protein-export membrane protein SecF	Comments=Rv2586c, (MT2663, MTCY227.15), len: 442 aa. Probable secF, protein-export membrane protein (integral membrane protein) (see citation below), equivalent to P38386|SECF_MYCLE|SECF|ML0488|MLCB1259.06|B1177_C3_239 protein-export membrane protein from Mycobacterium leprae (471 aa), FASTA scores: opt: 1910, E(): 2.9e-104, (72.15% identity in 456 aa overlap). Also similar to others e.g. Q9AE06|…	UniProt_AC=Q50635	Is_Pseudogene=No	cell wall and cell processes
RVBD_2633c	Rv2633c	-1.53453	2.10154e-05	0.000340058	121.515	85.8009	329.782	272.186	202.321	0.360741	-4.25382		1.46519	8.1251	0.000100023	0.000727091		Rv2633c	2959335	2959820	-	Rv2633c	Hypothetical protein	Comments=Rv2633c, (MTCY441.03c), len: 161 aa. Hypothetical unknown protein.	UniProt_AC=P65035	Is_Pseudogene=No	conserved hypotheticals		SUBFAMILY NOT MED (PTHR35585:SF2)	non-heme di-iron catalase(DOI 10.1074/jbc.RA117.000421)
RVBD_2637	Rv2637	-2.62621	2.94218e-06	6.31841e-05	13.7921	11.4999	88.7875	68.0465	45.5315	0.561779	-4.67482		2.554	5.0064	0.000419077	0.00245027		Rv2637	2963586	2964242	+	dedA	Possible transmembrane protein DedA	Comments=Rv2637, (MTCY441.07), len: 218 aa. Possible dedA, transmembrane protein, equivalent to Q49642|YQ37_MYCLE|ML0467|MLCL581.27|B1177_C2_172/B1177_C1_140 hypothetical 23.1 KDA protein (potential integral membrane protein, belongs to the DedA family) from Mycobacterium leprae (214 aa), FASTA scores: opt: 1160, E(): 4.4e-64, (82.75% identity in 209 aa overlap)	UniProt_AC=P63911	Is_Pseudogene=No	cell wall and cell processes
RVBD_2656c	Rv2656c	-2.36109	0.00332947	0.0200056	7.66227	6.422	50.7357	22.6822	21.8755	0.804306	-2.93556							Rv2656c	2978660	2979052	-	Rv2656c	Possible PhiRv2 prophage protein	Comments=Rv2656c, (MTCY441.25c), len: 130 aa. Probable phiRv2 phage protein (see Hatfull 2000), highly similar to O06607|YF83_MYCTU|Rv1583c|MT3573.2|MTCY336.21 Probable phiRV1 phage protein from Mycobacterium tuberculosis (132 aa), FASTA scores: opt: 734, E(): 2.5e-39, (81.5% identity in 131 aa overlap)	UniProt_AC=P71953	Is_Pseudogene=No	insertion seqs and phages
RVBD_2657c	Rv2657c	-3.41495	9.01561e-12	3.82504e-10	10.5469	9.78235	139.523	79.3876	59.81	0.500624	-6.8214		3.34197	5.06841	9.57726e-07	1.3073e-05		Rv2657c	2979049	2979309	-	Rv2657c	Probable PhiRv2 prophage protein	Comments=Rv2657c, (MTCY441.26c), len: 86 aa. Probable phiRv2 phage protein (excisionase) (see citation below), similar to O22001|VG36_BPMD2|36|G2 gene 36 protein (GP36) from Mycobacteriophage D29 (56 aa), FASTA scores: opt: 171, E(): 9.6e-06, (48.0% identity in 50 aa overlap)	UniProt_AC=P71954	Is_Pseudogene=No	insertion seqs and phages
RVBD_2666	Rv2666	-1.81837	0.00548871	0.0277547	14.6935	16.055	76.1035	34.0232	35.2188	0.65483	-2.77686							Rv2666	2983071	2983874	+	Rv2666	Probable transposase for insertion sequence element IS1081 (fragment)	Comments=Rv2666, (MTCY441.35), len: 267 aa. Probable transposase (fragment), identical in region of overlap to P35882|TRA1_MYCBO|TRA1_MYCTU transposase for insertion sequence element IS1081 from Mycobacterium tuberculosis or bovis (415 aa). Last 4 codons not part of gene. Contains PS01007 Transposases, Mutator family, signature.	UniProt_AC=P71963	Is_Pseudogene=No	insertion seqs and phages
RVBD_2668	Rv2668	-3.20989	3.23966e-05	0.000483724	7.75241	4.03242	76.1035	34.0232	30.4779	0.772363	-4.15593		3.13786	3.86177	0.00106122	0.00534308		Rv2668	2984733	2985254	+	Rv2668	Possible exported alanine and valine rich protein	Comments=Rv2668, (MTCY441.37), len: 173 aa. Hypothetical ala-, val-rich protein, possibly exported. Equivalent to AAK47057 from Mycobacterium tuberculosis strain CDC1551 (208 aa) but N-terminal part shorter 35 aa and with few differences. Has potential signal peptide sequence. Predicted to be an outer membrane protein (See Song et al., 2008).	UniProt_AC=P71965	Is_Pseudogene=No	cell wall and cell processes
RVBD_2691	Rv2691	-1.6809	0.000257665	0.00268887	57.1515	107.979	304.414	226.822	174.092	0.459951	-3.65452		1.60154	7.8477	0.000102272	0.000736902		Rv2691	3009344	3010027	+	ceoB	TRK system potassium uptake protein CeoB	Comments=Rv2691, (MTCY05A6.12), len: 227 aa. CeoB (alternate gene name: trkA), TRK system potassium uptake protein (see citation below), highly similar to others e.g. Q53949|TRKA_STRCO|SC2E9.17c from Streptomyces coelicolor (223 aa), FASTA scores: opt: 781, E(): 5.8e-42, (53.2% identity in 220 aa overlap)	UniProt_AC=Q7BV63	Is_Pseudogene=No	cell wall and cell processes			K+-uptake systems(https://doi.org/10.3389/fgene.2021.698875)
RVBD_2705c	Rv2705c	-2.10453	1.13883e-08	3.41549e-07	51.4724	67.7297	215.627	294.868	157.424	0.368657	-5.70864		2.03072	7.58947	7.34443e-07	1.05934e-05		Rv2705c	3019814	3020203	-	Rv2705c	Conserved hypothetical protein	Comments=Rv2705c, (MTCY05A6.26c), len: 129 aa (unlikely ORF). Conserved hypothetical protein, similar to others e.g. Q9RXR5|DR0242 conserved hypothetical protein from Deinococcus radiodurans (112 aa), FASTA scores: opt: 259, E(): 9.4e-10, (40.5% identity in 116 aa overlap)	UniProt_AC=O07206	Is_Pseudogene=No	conserved hypotheticals		SUBFAMILY NOT MED (PTHR34129:SF1)
RVBD_2706c	Rv2706c	-3.74299	2.168e-08	6.13208e-07	4.32693	6.27265	38.0518	102.07	37.6803	0.668627	-5.59803		3.66251	3.95086	3.39641e-05	0.000283843		Rv2706c	3020200	3020457	-	Rv2706c	Hypothetical protein	Comments=Rv2706c, (MTCY05A6.27c), len: 85 aa (unlikely ORF). Hypothetical unknown protein.	UniProt_AC=O07207	Is_Pseudogene=No	conserved hypotheticals
RVBD_2710	Rv2710	-1.61662	0.000504122	0.00468888	43.72	34.6489	139.523	102.07	79.9905	0.464738	-3.47856		1.54617	6.53186	0.00386709	0.0151297		Rv2710	3022461	3023432	+	sigB	RNA polymerase sigma factor SigB	Comments=Rv2710, (MTCY05A6.31), len: 323 aa. SigB (formerly known as mysB), RNA polymerase sigma factor (see citations below), equivalent to Q59531|ML1014 RNA polymerase sigma factor from Mycobacterium leprae (319 aa), FASTA scores: opt: 1935, E(): 1.9e-109, (96.2% identity in 316 aa overlap). Also highly similar to others e.g. Q59553|MYSB from Mycobacterium smegmatis (319 aa), FASTA scores: opt:…	UniProt_AC=Q59563	Is_Pseudogene=No	information pathways
RVBD_2713	Rv2713	-1.56181	0.000777914	0.00653711	38.4015	47.2689	164.891	90.7286	85.3225	0.46475	-3.36054		1.48766	6.65896	0.00478278	0.0178591		Rv2713	3025441	3026847	+	sthA	Probable soluble pyridine nucleotide transhydrogenase SthA (STH) (NAD(P)(+) transhydrogenase [B-specific]) (nicotinamide nucleotide transhydrogenase)	Comments=Rv2713, (MT2786, MTCY05A6.34), len: 468 aa. Probable sthA, soluble pyridine nucleotide transhydrogenase, highly similar to others e.g. Q983E2|MLR8366 from Rhizobium loti (Mesorhizobium loti) (481 aa), FASTA scores: opt: 1447, E(): 4.1e-78, (49.55% identity in 460 aa overlap)	UniProt_AC=P66006	Is_Pseudogene=No	intermediary metabolism and respiration
RVBD_2714	Rv2714	-4.70858	2.62678e-38	2.94792e-36	14.964	20.3861	342.466	578.395	239.053	0.363837	-12.9414		4.63409	8.05396	1.71652e-29	1.8337e-27		Rv2714	3027065	3028039	+	Rv2714	Conserved alanine and leucine rich protein	Comments=Rv2714, (MTCY05A6.35), len: 324 aa. Conserved ala-, leu-rich protein, equivalent to Q49847|ML1009|B2235_F1_6 hypothetical protein from Mycobacterium leprae (326 aa), FASTA scores: opt: 1881, E(): 5.8e-107, (89.7% identity in 320 aa overlap)	UniProt_AC=O07213	Is_Pseudogene=No	conserved hypotheticals			a representative of a new nucleoside phosphorylaselike family of duplicated actinobacterial proteins(doi:10.1107/S1744309109035027)
RVBD_2721c	Rv2721c	-1.30685	0.00102198	0.00813611	62.6503	68.6258	202.943	124.752	114.743	0.397895	-3.2844		1.2341	7.24204	0.00656571	0.0234136		Rv2721c	3032520	3034619	-	Rv2721c	Possible conserved transmembrane alanine and glycine rich protein	Comments=Rv2721c, (MTCY05A6.42c, MTCY154.01c), len: 699 aa. Possible conserved transmembrane ala-, gly-rich protein, equivalent to Q49837|ML1002|U2235I possible conserved membrane protein from Mycobacterium leprae (687 aa), FASTA scores: opt: 2703, E(): 6.6e-135, (60.3% identity in 713 aa overlap). Shows some similaity to Q01377|CSP1 PS1 protein precursor (secreted protein) from Corynebacterium g…	UniProt_AC=O07219	Is_Pseudogene=No	cell wall and cell processes
RVBD_2722	Rv2722	-3.06006	0.000814851	0.00673365	3.60577	3.65905	50.7357	11.3411	17.3354	0.91408	-3.3477		2.98025	3.02629	0.0138407	0.0426148		Rv2722	3034635	3034883	+	Rv2722	Conserved hypothetical protein	Comments=Rv2722, (MTCY154.02), len: 82 aa. Conserved hypothetical protein, similar to Q9CCB9|ML1001 hypothetical protein from Mycobacterium leprae (91 aa), FASTA scores: opt: 154, E(): 0.00053, (37.5% identity in 88 aa overlap). Equivalent to AAK47111 from Mycobacterium tuberculosis strain CDC1551 (94 aa) but shorter 12 aa. A core mycobacterial gene	UniProt_AC=O33227	Is_Pseudogene=No	conserved hypotheticals
RVBD_2723	Rv2723	-6.5903	2.95877e-211	2.57339e-208	54.2669	71.8368	6139.02	6022.11	3071.81	0.212458	-31.0193		6.51623	12.2391	2.82209e-71	8.66734e-69		Rv2723	3034909	3036102	+	Rv2723	Probable conserved integral membrane protein	Comments=Rv2723, (MTCY154.03), len: 397 aa. Probable conserved integral membrane protein, highly similar to others e.g. Q9Z503|SCC54.23c putative integral membrane export protein from Streptomyces coelicolor (333 aa), FASTA scores: opt: 883, E(): 2.4e-48, (46.4% identity in 332 aa overlap)	UniProt_AC=P0A614	Is_Pseudogene=No	cell wall and cell processes
RVBD_2733c	Rv2733c	-3.96449	2.44189e-25	2.0227e-23	20.1022	15.4576	342.466	215.481	148.377	0.381148	-10.4014		3.89259	7.04013	2.46271e-17	1.3752e-15		Rv2733c	3044986	3046524	-	Rv2733c	Conserved hypothetical alanine, arginine-rich protein	Comments=Rv2733c, (MTCY154.13c), len: 512 aa. Conserved hypothetical ala-, arg-rich protein. Similar to other hypothetical proteins from a range of organisms e.g. Y195_MYCLE|Q49842 hypothetical 56.0 kDa protein b2235_c2_195 from Mycobacterium leprae (516 aa), FASTA scores: opt: 2689, E(): 0, (80.4% identity in 509 aa overlap).	UniProt_AC=P67085	Is_Pseudogene=No	conserved hypotheticals		TR-2-METHYLTHIO-N(6)-DIMETHYLALLYLADENOSINE SYNTHASE (PTHR43020:SF1)	Catalyzes the methylthiolation of N6-(dimethylallyl)adenosine (i6A), leading to the formation of 2-methylthio-N6-(dimethylallyl)adenosine (ms2i6A) at position 37 in tRNAs that read codons beginning with uridine (Uniprot)
RVBD_2738c	Rv2738c	-8.37762	1.8134e-153	7.00981e-151	4.32693	2.53893	1078.13	1179.47	566.118	0.317462	-26.3894		8.29776	9.60025	7.58454e-74	3.10587e-71		Rv2738c	3051806	3052012	-	Rv2738c	Conserved hypothetical protein	Comments=Rv2738c, (MTV002.03c), len: 68 aa. Conserved hypothetical protein, equivalent to Q9CCC1|ML0986 hypothetical protein from Mycobacterium leprae (67 aa), FASTA scores: opt: 397, E(): 3.7e-22, (83.6% identity in 67 aa overlap). Also highly similar to O50484|SC4H8.05 hypothetical 7.5 KDA protein from Streptomyces coelicolor (64 aa), FASTA scores: opt: 185, E(): 5.9e-07, (39.7% identity in 63 …	UniProt_AC=O33281	Is_Pseudogene=No	conserved hypotheticals
RVBD_2739c	Rv2739c	-6.11693	1.955e-112	4.5343e-110	10.5469	9.25963	608.828	759.852	347.122	0.271461	-22.5334		6.04158	8.74081	1.61803e-52	2.65034e-50		Rv2739c	3052023	3053189	-	Rv2739c	Possible alanine rich transferase	Comments=Rv2739c, (MTV002.04c), len: 388 aa. Possible ala-rich transferase, equivalent to Q49841|ML0985|MLCB33.02c|U2235C possible glycosyltransferase from Mycobacterium leprae (392 aa), FASTA scores: opt: 2112, E(): 5.1e-114, (80.95% identity in 388 aa overlap). Shows some similarity with other transferases e.g. Q9S1V2|SCJ4.21 putative glycosyl transferase from Streptomyces coelicolor (407 aa), …	UniProt_AC=O33282	Is_Pseudogene=No	intermediary metabolism and respiration			glycosyltransferase?
RVBD_2752c	Rv2752c	-4.15003	0.000484099	0.00457658	0.811299	1.19479	12.6839	22.6822	9.34304	1.18932	-3.4894		4.04914	1.44278	0.0146731	0.0448965		Rv2752c	3064515	3066191	-	Rv2752c	Conserved hypothetical protein	Comments=Rv2752c, (MTV002.17c), len: 558 aa. Conserved hypothetical protein, equivalent to Q9CBW5|ML1512 hypothetical protein from Mycobacterium leprae (558 aa), FASTA scores: opt: 3301, E(): 1.2e-195, (89.05% identity in 558 aa overlap). Also highly similar to other hypothetical proteins from a wide range of prokaryotes e.g. CAC19480|P54122|YOR4_CORGL from Corynebacterium glutamicum (Brevibacter…	UniProt_AC=O33294	Is_Pseudogene=No	conserved hypotheticals		SUBFAMILY NOT MED (PTHR43694:SF1)	bifunctional β-lactamase/ribonuclease (https://doi.org/10.1134/S0006297911030096)
RVBD_2766c	Rv2766c	-1.91762	0.000177003	0.00199286	22.8065	27.7042	76.1035	113.411	60.0063	0.511397	-3.74976		1.8439	5.92179	0.00248227	0.0105336		Rv2766c	3075588	3076370	-	Rv2766c	Probable short-chain type dehydrogenase/reductase	Comments=Rv2766c, (MTV002.31c), len: 260 aa. Probable short-chain dehydrogenase/reductase , similar to others (from bacteria and eukaryota) e.g. Q9K3Y8|2SCG61.27c putative short chain oxidoreductase from Streptomyces coelicolor (253 aa), FASTA scores: opt: 722, E(): 7.4e-39, (44.75% identity in 248 aa overlap)	UniProt_AC=Q7D6M3	Is_Pseudogene=No	intermediary metabolism and respiration
RVBD_2778c	Rv2778c	-1.95791	0.000110677	0.00133696	22.0854	27.2562	101.471	90.7286	60.3854	0.506455	-3.86591		1.88365	5.89844	0.00209006	0.00918653		Rv2778c	3085713	3086183	-	Rv2778c	Conserved protein	Comments=Rv2778c, (MTV002.43c), len: 156 aa. Conserved protein, similar to Q9CBF7|ML2031 hypothetical protein from Mycobacterium leprae (151 aa), FASTA scores: opt: 227, E(): 8.5e-09, (35.95% identity in 153 aa overlap). Also similar to AAK46204|MT1931.1 hypothetical 17.8 KDA protein from Mycobacterium tuberculosis strain CDC1551 (158 aa), FASTA scores: opt: 238, E(): 1.5e-09, (35.75% identity in…	UniProt_AC=O33320	Is_Pseudogene=No	conserved hypotheticals
RVBD_2797c	Rv2797c	-1.96264	2.11068e-08	6.0189e-07	94.2008	76.0932	418.57	249.504	209.592	0.350304	-5.60268		1.89176	8.09972	7.37267e-07	1.05934e-05		Rv2797c	3105619	3107307	-	Rv2797c	Conserved hypothetical protein	Comments=Rv2797c, (MTCY16B7.46), len: 562 aa. Conserved hypothetical ala-rich protein. C-terminus highly similar to several mycobacterial proteins e.g. AAK46927|MT2616 hypothetical 28.0 KDA protein from Mycobacterium tuberculosis strain CDC1551 (265 aa), FASTA scores: opt: 535, E(): 4.6e-22, (42.95% identity in 263 aa overlap)	UniProt_AC=P71654	Is_Pseudogene=No	conserved hypotheticals
RVBD_2806	Rv2806	-3.44543	0.00839966	0.0369047	0.721155	2.53893	12.6839	22.6822	9.65654	1.30728	-2.63557							Rv2806	3113268	3113459	+	Rv2806	Possible membrane protein	Comments=Rv2806, (MTCY16B7.37c), len: 63 aa. Possible membrane protein, sharing no homology. This region is a possible MT-complex-specific genomic island (See Becq et al., 2007).	UniProt_AC=P71645	Is_Pseudogene=No	cell wall and cell processes
RVBD_2807	Rv2807	-2.31262	0.000627167	0.00556429	12.0793	9.78235	76.1035	34.0232	32.9971	0.676286	-3.41958		2.23991	4.61537	0.00663318	0.0235857		Rv2807	3113658	3114812	+	Rv2807	Conserved hypothetical protein	Comments=Rv2807, (MTCY16B7.36c), len: 384 aa. Conserved hypothetical protein, highly similar, but shorter 35 aa, to Q9KK74 hypothetical 47.4 KDA protein from Brevibacterium linens (418 aa), FASTA scores: opt: 1865, E(): 9.4e-116, (69.75% identity in 380 aa overlap)	UniProt_AC=P71644	Is_Pseudogene=No	conserved hypotheticals
RVBD_2822c	Rv2822c	-3.73336	0.0016607	0.0116719	0.991588	1.71751	25.3678	11.3411	9.85451	1.18707	-3.14503							Rv2822c	3128973	3129347	-	Rv2822c	Hypothetical protein	Comments=Rv2822c, (MTCY16B7.20), len: 124 aa. Hypothetical unknown protein. This region is a possible MT-complex-specific genomic island (See Becq et al., 2007).	UniProt_AC=P71630	Is_Pseudogene=No	conserved hypotheticals			Endonuclease that displays both RNase H activity with a hybrid RNA/DNA substrate as well as double-stranded RNase activity. As the only authenticated RNase HI in M.tuberculosis, probably plays an important role in the physiology of this organism, being likely involved in bacterial replication. Has a possible role in B12 recycling, but the primary role of the C-terminal domain of this phosphatase …
RVBD_2826c	Rv2826c	-5.03813	1.00663e-20	6.6077e-19	3.2452	2.98698	126.839	79.3876	53.1147	0.539683	-9.33534		4.96006	3.79292	3.53856e-09	9.34864e-08		Rv2826c	3133709	3134593	-	Rv2826c	Hypothetical protein	Comments=Rv2826c, (MTCY16B7.16), len: 294 aa. Hypothetical unknown protein.	UniProt_AC=P71626	Is_Pseudogene=No	conserved hypotheticals			MenT4, nucleotidyltransferase toxin;inhibits growth of Mycobacterium tuberculosis through inactivation of tRNA acceptor stems(https://doi.org/10.1126/sciadv.abb6651)
RVBD_2840c	Rv2840c	-2.26017	0.000478425	0.00454765	16.5866	11.1265	88.7875	45.3643	40.4662	0.647139	-3.49255		2.18874	5.00385	0.00397733	0.0154616		Rv2840c	3147959	3148258	-	Rv2840c	Conserved hypothetical protein	Comments=Rv2840c, (MTCY16B7.02), len: 99 aa. Conserved hypothetical protein, equivalent to Q9Z5J0|ML1557|MLCB596.13 hypothetical 11.6 KDA protein from Mycobacterium leprae (106 aa), FASTA scores: opt: 501, E(): 2.3e-29, (501% identity in 96 aa overlap). Also highly similar to other hypothetical proteins e.g. Q9KYR0|SC5H4.29 from Streptomyces coelicolor (101 aa), FASTA scores: opt: 256, E(): 1.4e-…	UniProt_AC=P71612	Is_Pseudogene=No	conserved hypotheticals		SUBFAMILY NOT MED (PTHR34215:SF1)
RVBD_2848c	Rv2848c	-2.06521	0.00343743	0.0201478	16.0457	9.70768	50.7357	56.7054	33.2986	0.705898	-2.92564		1.99653	4.81044	0.0130389	0.0407589		Rv2848c	3156148	3157521	-	cobB	Probable cobyrinic acid A,C-diamide synthase CobB	Comments=Rv2848c, (MTCY24A1.09), len: 457 aa. Probable cobB, cobyrinic acid A,C-diamide synthase, highly similar to others e.g. O27509|COBB_METTH|MTH1460 from Methanobacterium thermoautotrophicum (447 aa), FASTA scores: opt: 980, E(): 1.3e-49, (39.65% identity in 454 aa overlap)	UniProt_AC=P63835	Is_Pseudogene=No	intermediary metabolism and respiration			cobalamin biosynthesis
RVBD_2873	Rv2873	-2.73913	3.84348e-05	0.000563233	7.30169	8.81158	50.7357	56.7054	30.8886	0.665372	-4.11669		2.66303	4.24878	0.00199894	0.00884934		Rv2873	3183905	3184567	+	mpt83	Cell surface lipoprotein Mpt83 (lipoprotein P23)	Comments=Rv2873, (MTCY274.04), len: 220 aa. Mpt83 (alternate gene name: mpb83), cell surface lipoprotein (see citations below). Also similar to upstream ORF Q50769|MP70_MYCTU|MPT70|MPB70|Rv2875|MT2943|MTCY274.06 which is also known as major secreted immunogenic protein MPT70 precursor from Mycobacterium tuberculosis (193 aa), FASTA scores: opt: 806, E(): 2.7e-38, (70.25% identity in 185 aa overla…	UniProt_AC=P0A670	Is_Pseudogene=No	cell wall and cell processes			Redox stress (https://doi.org/10.1038/s41467-019-12224-3)
RVBD_2899c	Rv2899c	-4.42477	4.62502e-07	1.10208e-05	1.17188	3.8084	50.7357	56.7054	28.1053	0.877713	-5.04125		4.33383	2.89689	5.29885e-05	0.000418626		Rv2899c	3208576	3209406	-	fdhD	Possible FdhD protein homolog	Comments=Rv2899c, (MTCY274.30c), len: 276 aa. Possible fdhD protein homolog, highly similar to other bacterial fdhd protein homologs or formate dehydrogenase accessory proteins e.g. Q9ZBW0|FDHD_STRCO|SC4B5.08c from Streptomyces coelicolor (282 aa), FASTA scores: opt: 1032, E(): 3.6e-59, (59.0% identity in 278 aa overlap)	UniProt_AC=P64118	Is_Pseudogene=No	intermediary metabolism and respiration			Required for formate dehydrogenase (FDH) activity. Acts as a sulfur carrier protein that transfers sulfur from IscS to the molybdenum cofactor prior to its insertion into FDH (Uniprot)
RVBD_2917	Rv2917	-1.12816	0.0109796	0.0448862	53.726	50.5546	126.839	102.07	83.2974	0.443575	-2.54335							Rv2917	3226363	3228243	+	Rv2917	Conserved hypothetical alanine and arginine rich protein	Comments=Rv2917, (MTCY338.05), len: 626 aa. Conserved hypothetical ala-, arg-rich protein, highly similar (but longer 34 aa) to O33011|ML1624|MLCB250.18C hypothetical 65.2 KDA protein from Mycobacterium leprae (596 aa), FASTA scores: opt: 3117, E(): 9e-183, (79.8% identity in 584 aa overlap). Also highly similar to Q9S2E8|SCE19A.36C hypothetical 66.2 KDA protein from Streptomyces coelicolor (598 …	UniProt_AC=Q10966	Is_Pseudogene=No	conserved hypotheticals
RVBD_2918c	Rv2918c	-4.2253	4.4347e-32	4.40809e-30	13.7921	12.9934	202.943	294.868	131.149	0.358403	-11.7893		4.15064	6.72467	4.84944e-17	2.64779e-15		Rv2918c	3228254	3230680	-	glnD	Probable [protein-PII] uridylyltransferase GlnD (PII uridylyl- transferase) (uridylyl removing enzyme) (UTASE)	Comments=Rv2918c, (MTCY338.07c), len: 808 aa. Probable glnD, uridylyltransferase (ala-rich protein), similar to other uridylyltransferases e.g. O69873||SC2E1.02 from Streptomyces coelicolor (835 aa), FASTA scores: opt: 1473, E(): 2.8e-81, (41.03% identity in 858 aa overlap)	UniProt_AC=Q10961	Is_Pseudogene=No	intermediary metabolism and respiration			intracellular N2 sensor, ammonia assimilation; N2 metabolism (doi:10.1016/j.tube.2006.12.003,https://doi.org/10.1111/j.1574-6976.2010.00216.x)
RVBD_2929	Rv2929	-4.67486	1.19136e-21	8.12695e-20	6.03967	4.70449	101.471	170.116	70.5829	0.489063	-9.55879		4.5972	4.83342	1.90275e-11	6.97769e-10		Rv2929	3242970	3243281	+	Rv2929	Hypothetical protein	Comments=Rv2929, (MTCY338.18), len: 103 aa. Hypothetical unknown protein	UniProt_AC=P65061	Is_Pseudogene=No	conserved hypotheticals			associated with PDIM/PGL synthesis locus (doi:10.1111/j.1472-765X.2005.01659.x,https://doi.org/10.1371/journal.ppat.1002621)
RVBD_2958c	Rv2958c	-1.83626	0.000623692	0.00554943	25.601	44.4313	101.471	147.434	79.7344	0.536747	-3.4211		1.76082	6.46028	0.00154551	0.00730255		Rv2958c	3310714	3312000	-	Rv2958c	Possible glycosyl transferase	Comments=Rv2958c, (MTCY349.30), len: 428 aa. Possible glycosyl transferase (see citation below), highly similar to Q9CD88|ML0128 putative glycosyl transferase from Mycobacterium leprae (435 aa), FASTA scores: opt: 2116, E(): 5.8e-126, (75.05% identity in 417 aa overlap)	UniProt_AC=P95134	Is_Pseudogene=No	intermediary metabolism and respiration			PGL synthesis (https://doi.org/10.1074/jbc.M406246200)
RVBD_2971	Rv2971	-4.08531	7.11244e-06	0.000138236	1.80289	1.71751	25.3678	34.0232	15.7279	0.909809	-4.4903		3.99819	2.18669	0.00214222	0.00934893		Rv2971	3326101	3326949	+	Rv2971	Probable oxidoreductase	Comments=Rv2971, (MTCY349.16c), len: 282 aa. Probable oxidoreductase, possibly aldo/keto reductase, equivalent to O69462 putative oxidoreductase from Mycobacterium leprae (282 aa), FASTA scores: opt: 1495, E(): 4.9e-93, (82.35% identity in 272 aa overlap). Also similar to others e.g. Q9KYM9|SC9H11.10C oxidoreductase from Streptomyces coelicolor (276 aa), FASTA scores: opt: 849, E(): 1.2e-49, (51.…	UniProt_AC=P95124	Is_Pseudogene=No	intermediary metabolism and respiration			Aldo-keto reductases (AKR) are a large superfamily of NADPH-dependent oxidoreductases and play a role in detoxification of toxic metabolites (doi:10.1107/S2053230X14007158)
RVBD_2997	Rv2997	-2.48704	0.00312432	0.0190693	6.40025	6.27265	12.6839	56.7054	20.5156	0.841571	-2.95523						2.69436	Rv2997	3355099	3356541	+	Rv2997	Possible alanine rich dehydrogenase	Comments=Rv2997, (MTV012.11), len: 480 aa. Possible ala-rich dehydrogenase, similar to others dehydrogenases and hypothetical proteins e.g. Q9EYI5 putative dehydrogenase from Streptomyces nogalater (472 aa), FASTA scores: opt: 1131, E(): 1.7e-61, (41.0% identity in 471 aa overlap)	UniProt_AC=O53244	Is_Pseudogene=No	intermediary metabolism and respiration			The noxR1 gene locus in M. bovis BCG bestows ability to resist RNI generated in vitro. In M. tuberculosis H37Rv, however, noxR1 is either not involved in RNI resistance and virulence or is better compensated for by other mechanisms (doi: 10.1054/tuld.2000.0251,https://doi.org/10.1084/jem.186.11.1885)
RVBD_3005c	Rv3005c	-2.35349	1.98566e-08	5.70917e-07	33.8943	31.2886	114.155	215.481	98.7047	0.419274	-5.61325		2.28118	6.65799	9.18289e-06	9.20913e-05		Rv3005c	3363693	3364532	-	Rv3005c	Conserved hypothetical protein	Comments=Rv3005c, (MTV012.19c), len: 279 aa. Conserved hypothetical protein, equivalent to O33110|MLCB637.18|ML1698 hypothetical 29.5 KDA protein from Mycobacterium leprae (277 aa), FASTA scores: opt: 1245, E(): 1.2e-65, (70.5% identity in 278 aa overlap). Also similar, but longer approximately 100 aa in N-terminus, to other hypothetical proteins, few membrane proteins, e.g. Q9RKN9|SCC75A.35 puta…	UniProt_AC=O53252	Is_Pseudogene=No	conserved hypotheticals		INNER MEMBRANE PROTEIN YPHA-RELATED (PTHR33452:SF1)	DoxX; membrane oxidoreductase complex (MRC) that is physically coupled to SodA (Nambi et al)
RVBD_3009c	Rv3009c	-2.48221	5.61638e-06	0.000112295	16.7668	13.292	88.7875	79.3876	49.5585	0.546701	-4.54034		2.41068	5.25524	0.000439297	0.00251597		Rv3009c	3367264	3368793	-	gatB	Probable glutamyl-tRNA(GLN) amidotransferase (subunit B) GatB (Glu-ADT subunit B)	Comments=Rv3009c, (MT3089, MTV012.23c), len: 509 aa. Probable gatB, Glu- tRNA-Gln amidotransferase, subunit B , equivalent to O33107|GATB_MYCLE|MLCB637_15 glutamyl-tRNA(GLN) amidotransferase from Mycobacterium leprae (509 aa), FASTA scores: opt: 2973, E(): 2.9e-173, (88.4% identity in 509 aa overlap). Also highly similar to other Glu- tRNA-Gln amidotransferases e.g. Q9Z578|GATB|SC8D9.13 from Stre…	UniProt_AC=P64199	Is_Pseudogene=No	information pathways			GatB specifically recognizes the misacylated tRNA complexes and subsequently performs the amidotransferase reaction;Allows the formation of correctly charged Asn-tRNA(Asn) or Gln-tRNA(Gln) through the transamidation of misacylated Asp-tRNA(Asn) or Glu-tRNA(Gln) in organisms which lack either or both of asparaginyl-tRNA or glutaminyl-tRNA synthetases.(https://doi.org/10.3389/fmicb.2020.577756)
RVBD_3028c	Rv3028c	-4.72269	5.01645e-08	1.34863e-06	1.44231	1.26947	25.3678	45.3643	18.361	0.866432	-5.45073		4.63019	1.99677	0.000309022	0.00187937		Rv3028c	3387075	3388031	-	fixB	Probable electron transfer flavoprotein (alpha-subunit) FixB (alpha-ETF) (electron transfer flavoprotein large subunit) (ETFLS)	Comments=Rv3028c, (MTV012.43c), len: 318 aa. Probable fixB (alternate gene name: etfA), electron transfer flavoprotein (alpha subunit) for various dehydrogenases. Equivalent to O33096|ETFA_MYCLE|FIXB|ML1711|MLCB637.04 electron transfer flavoprotein from Mycobacterium leprae (318 aa), FASTA scores: opt: 1788, E(): 1.1e-87, (89.3% identity in 318 aa overlap). Also highly similar to many e.g. Q9K418…	UniProt_AC=O53275	Is_Pseudogene=No	intermediary metabolism and respiration			electron acceptor flavoprotein of dehydrogenases at complex II; intracellular redox balance (https://doi.org/10.1099/mic.0.000512)
RVBD_3033	Rv3033	-3.35085	0.000285826	0.0029333	2.97476	2.83763	12.6839	45.3643	15.9652	0.923655	-3.62782		3.27124	2.75704	0.0133839	0.0416255		Rv3033	3393380	3393928	+	Rv3033	Unknown protein	Comments=Rv3033, (MTV012.48), len: 182 aa. Unknown protein. Predicted to be an outer membrane protein (See Song et al., 2008).	UniProt_AC=O53280	Is_Pseudogene=No	conserved hypotheticals			Anti-apoptotic protein (https://doi.org/10.3389/fimmu.2018.02136)
RVBD_3034c	Rv3034c	-1.94879	0.000900447	0.00730223	20.1022	17.3991	101.471	45.3643	46.0843	0.587001	-3.31992		1.87614	5.40904	0.00691857	0.0244238		Rv3034c	3394019	3394921	-	Rv3034c	Possible transferase	Comments=Rv3034c, (MTV012.49c), len: 300 aa. Possible transferase (2.-.-.-), equivalent to AAK47449|MT3119 Hexapeptide transferase family protein from M. tuberculosis strain CDC1551 but N-terminus shorter 39 residues (262 aa), FASTA scores: opt: 1773, E(): 4.7e-105, (100.0% identity in 262 aa overlap). Similar to Q9CBR1|ML1719 from Mycobacterium leprae but also shorter in N-terminus (245 aa), FAS…	UniProt_AC=O53281	Is_Pseudogene=No	intermediary metabolism and respiration			Acetyltransferase;Regulates host peroxisome homeostasis in response to intracellular redox levels to favor mycobacterial infection in macrophage (PubMed:32388919).
RVBD_3043c	Rv3043c	-3.8685	0.000505653	0.00468888	0.991588	2.24023	12.6839	34.0232	12.4847	1.11236	-3.47774		3.77613	2.03121	0.00901865	0.0301071		Rv3043c	3403200	3404921	-	ctaD	Probable cytochrome C oxidase polypeptide I CtaD (cytochrome AA3 subunit 1)	Comments=Rv3043c, (MTV012.58c), len: 573 aa. Probable ctaD, integral membrane cytochrome C oxidase polypeptide I, equivalent to Q9CBQ5|ML1728 from Mycobacterium leprae (574 aa), FASTA scores: opt: 3738, E(): 3.8e-216, (95.4% identity in 566 aa overlap). Also similar to other cytochrome C oxidases polypeptide I e.g. Q9AEL9|CTAD from Corynebacterium glutamicum (Brevibacterium flavum) (584 aa), FAST…	UniProt_AC=P63852	Is_Pseudogene=No	intermediary metabolism and respiration
RVBD_3052c	Rv3052c	-3.44277	0.000163686	0.00187942	2.16346	4.48047	50.7357	22.6822	20.0154	0.913365	-3.76933		3.35625	2.99787	0.00334417	0.0133604		Rv3052c	3414232	3414684	-	nrdI	Probable NrdI protein	Comments=Rv3052c, (MTCY22D7.30), len: 150 aa. Probable nrdI, equivalent to Q9CBP9|NRDI|ML1735 from Mycobacterium leprae (138 aa), FASTA scores: opt: 765, E(): 3.8e-44, (79.7% identity in 138 aa overlap), and similar to many NRDI proteins e.g. Q47415|NRDI_ECOLI|B2674 from Escherichia coli (136 aa), FASTA scores: opt: 574, E(): 1.9e-31, (62.2% identity in 135 aa overlap). Belongs to the NRDI family.	UniProt_AC=P65548	Is_Pseudogene=No	information pathways
RVBD_3053c	Rv3053c	-3.99063	2.34097e-07	5.77606e-06	2.52404	2.76295	50.7357	34.0232	22.5115	0.771882	-5.17		3.9091	2.79428	0.000763857	0.00406233		Rv3053c	3414719	3414958	-	nrdH	Probable glutaredoxin electron transport component of NRDEF (glutaredoxin-like protein) NrdH	Comments=Rv3053c, (MTCY22D7.29), len: 79 aa. Probable nrdH, glutaredoxin-like protein, equivalent to Q9CBP8|NRDH|ML1736 from Mycobacterium leprae (80 aa), FASTA scores: opt: 478, E(): 2.7e-27, (91.15% identity in 79 aa overlap), and similar to many glutaredoxin-like proteins e.g. Q9XD65|NRDH from Corynebacterium glutamicum (Brevibacterium flavum) (77 aa), FASTA scores: opt: 382, E(): 1.5e-20, (72…	UniProt_AC=P95106	Is_Pseudogene=No	information pathways			Putative Mrx1 like protein (Ashima, PlosPath)
RVBD_3056	Rv3056	-2.21201	5.88717e-09	1.93222e-07	44.1707	61.8304	253.678	238.163	149.461	0.380075	-5.81993		2.13697	7.46077	2.92394e-07	4.75769e-06		Rv3056	3416705	3417745	+	dinP	Possible DNA-damage-inducible protein P DinP (DNA polymerase V) (pol IV 2) (DNA nucleotidyltransferase (DNA-directed))	Comments=Rv3056, (MTCY22D7.25c, MT3142), len: 346 aa. Possible dinP (alternate gene name: dinB2), DNA-damage-inducible protein (DNA polymerase V) (see citations below), similar to others e.g. AAK45855|MT1589 from Mycobacterium tuberculosis strain CDC1551 (485 aa), FASTA scores: opt: 620, E(): 6.1e-32, (37.2% identity in 344 aa overlap)	UniProt_AC=P63987	Is_Pseudogene=No	information pathways
RVBD_3066	Rv3066	-1.75144	0.00470542	0.0246859	15.8654	19.714	63.4196	56.7054	38.9261	0.61964	-2.82654							Rv3066	3430707	3431315	+	Rv3066	Probable transcriptional regulatory protein (probably DeoR-family)	Comments=Rv3066, (MTCY22D7.15c), len: 202 aa. Probable transcriptional regulatory protein deoR-family, with some similarity to transcriptional regulators and hypothetical proteins, e.g. Q9X9V5|SCI7.35c hypothetical 21.1 KDA protein from Streptomyces coelicolor (197 aa), FASTA scores: opt: 398, E(): 5.7e-19, (40.3% identity in 191 aa overlap)	UniProt_AC=P95092	Is_Pseudogene=No	regulatory proteins			Transcriptional regulator of mmr operon (https://doi.org/10.1093/nar/gks677)
RVBD_3098B	Rv3098B	-3.77774	3.12317e-16	1.67162e-14	8.56371	10.6038	126.839	136.093	70.5249	0.462478	-8.16847		3.70192	5.27733	3.04331e-09	8.30823e-08														Antitioxin (UniProtKB - V5QPS4 (3098B_MYCTU))
RVBD_3098c	Rv3098c	-3.02331	2.18442e-10	8.1716e-09	13.5217	18.818	126.839	136.093	73.818	0.476278	-6.34778		2.94758	5.76649	5.09169e-07	7.64691e-06		Rv3098c	3467210	3467662	-	Rv3098c	Hypothetical protein	Comments=Rv3098c, (MTCY164.09c), len: 150 aa. Hypothetical unknown protein (shorter version of MTCY164.09c). This region is a possible MT-complex-specific genomic island (See Becq et al., 2007).	UniProt_AC=O05776	Is_Pseudogene=No	conserved hypotheticals
RVBD_3104c	Rv3104c	-2.60203	7.04722e-06	0.000137738	10.8173	14.7855	76.1035	79.3876	45.2735	0.579225	-4.49226		2.52609	5.02451	0.000398607	0.00234301		Rv3104c	3471852	3472778	-	Rv3104c	Possible conserved transmembrane protein	Comments=Rv3104c, (MTCY164.14c), len: 308 aa. Possible conserved transmembrane protein, with some similarity to hypthetical proteins e.g. Q9L1X9|SC8E4A.26 putative membrane protein from Streptomyces coelicolor (408 aa), FASTA scores: opt: 514, E(): 4.3e-25, (35.2% identity in 287 aa overlap)	UniProt_AC=O05781	Is_Pseudogene=No	cell wall and cell processes
RVBD_3133c	Rv3133c	-2.24669	0.000250934	0.00264545	12.1695	15.4576	50.7357	79.3876	39.4376	0.61363	-3.66131		2.17187	5.00485	0.00395076	0.0153835		Rv3133c	3499262	3499915	-	devR	Two component transcriptional regulatory protein DevR (probably LuxR/UhpA-family)	Comments=Rv3133c, (MTCY03A2.25), len: 217 aa. DevR (alternate gene name: dosR), two component transcriptional regulator (see Dasgupta et al., 2000	UniProt_AC=P95193	Is_Pseudogene=No	regulatory proteins			DosR
RVBD_3135	Rv3135	-3.41784	1.14639e-31	1.10786e-29	146.214	229.026	1877.22	2132.12	1096.15	0.291898	-11.709		3.34251	10.7043	1.17014e-23	8.45596e-22		Rv3135	3501334	3501732	+	PPE50	PPE family protein PPE50	Comments=Rv3135, (MTCY03A2.23c), len: 132 aa. PPE50, Member of the Mycobacterium tuberculosis Ala-, Gly-rich PPE family, similar to P95190|Rv3136|MTCY03A2.22c (380 aa), FASTA scores: opt: 494, E(): 6.7e-25, (57.25% identity in 131 aa overlap) (next ORF downstream), MTY21C12_9, MTCY3C7_24, MTCI125_27, MTV049_12, MTV049_9, MTV049_11, MTCY274_24 etc.	UniProt_AC=Q6MX07	Is_Pseudogene=No	PE/PPE
RVBD_3136	Rv3136	-3.74533	8.03735e-41	9.64205e-39	39.3931	50.6293	583.461	623.759	324.311	0.279944	-13.3789		3.67117	8.68714	3.24961e-25	2.7532e-23		Rv3136	3501794	3502936	+	PPE51	PPE family protein PPE51	Comments=Rv3136, (MTCY03A2.22c), len: 380 aa. PPE51, Member of the Mycobacterium tuberculosis Ala-, Gly-rich PPE family, similar to Q9AGF0|Ov2770c Rv2770c-like protein from M. microti (397 aa), FASTA scores: opt: 917, E(): 9e-41, (46.15% identity in 388 aa overlap)	UniProt_AC=Q7D623	Is_Pseudogene=No	PE/PPE			Disaccharide, trehalose, glucose, glycerol import (ttps://doi.org/10.1038/s41598-022-06109-7)(DOI: 10.3390/cells9030603)(https://doi.org/10.1126/science.aav5912)
RVBD_3159c	Rv3159c	-1.20822	0.012328	0.0491332	43.8102	39.2041	101.471	90.7286	68.8036	0.482783	-2.50262							Rv3159c	3527391	3529163	-	PPE53	PPE family protein PPE53	Comments=Rv3159c, (MTV014.03c), len: 590 aa. PPE53, Member of the Mycobacterium tuberculosis PPE_family of Gly-, Asn-rich proteins. Highly similar to P71868|Rv3533c|MTCY03C7.23 (582 aa), FASTA scores: opt: 2289, E(): 3.2e-98, (63.5% identity in 600 aa overlap)	UniProt_AC=Q6MX04	Is_Pseudogene=No	PE/PPE
RVBD_3169	Rv3169	-2.19662	0.00280836	0.0176359	9.91588	8.43821	50.7357	34.0232	25.7783	0.735153	-2.98797							Rv3169	3537238	3538362	+	Rv3169	Conserved protein	Comments=Rv3169, (MTV014.13), len: 374 aa. Conserved protein, with similarity to other hypothetical proteins: Q9A8W6|CC1232 from Caulobacter crescentus (368 aa), FASTA scores: opt: 669, E(): 3.3e-34, (34.05% identity in 376 aa overlap)	UniProt_AC=O53319	Is_Pseudogene=No	conserved hypotheticals			peroxidase
RVBD_3177	Rv3177	-10.0162	9.89829e-12	4.14893e-10	0.450722	6.422	3399.29	3731.22	1784.34	1.47125	-6.80797		9.88824	11.4236	2.0764e-96	1.70058e-93		Rv3177	3545447	3546307	+	Rv3177	Possible peroxidase (non-haem peroxidase)	Comments=Rv3177, (MTV014.21), len: 286 aa. Possible peroxidase (non-haem peroxidase), highly similar to Q9KJF9|W78 cultivar specificity protein (similar to alpha/beta hydrolase fold) W78 from Rhizobium leguminosarum (287 aa), FASTA scores: opt: 1059, E(): 2.3e-59, (61.4% identity in 272 aa overlap)	UniProt_AC=O53327	Is_Pseudogene=No	virulence, detoxification, adaptation			Putative F420H(2)-dependent quinone reductase Rv3178; Involved in a F420-dependent anti-oxidant mechanism that protects M.tuberculosis against oxidative stress and bactericidal agents; Uniprot (https://doi.org/10.1073/pnas.2025172118); Ddn
RVBD_3178	Rv3178	-2.12463	0.00390419	0.0219075	8.65386	10.5291	38.0518	45.3643	25.6498	0.736235	-2.8858							Rv3178	3546438	3546797	+	Rv3178	Conserved hypothetical protein	Comments=Rv3178, (MTV014.22), len: 119 aa. Hypothetical protein, with some similarity to other hypothetical bacterial proteins (principally mycobacterium and streptomyces proteins) e.g. P71854|Rv3547|MTCY03C7.09c from Mycobacterium tuberculosis strain H37Rv (151 aa), FASTA scores: opt: 310, E(): 2e-14, (40.5% identity in 116 aa overlap)	UniProt_AC=O53328	Is_Pseudogene=No	conserved hypotheticals		SUBFAMILY NOT MED (PTHR39428:SF3)
RVBD_3179	Rv3179	-1.85312	0.00246788	0.0161407	15.6851	20.6101	50.7357	79.3876	41.6046	0.612146	-3.02725		1.77893	5.32547	0.0118723	0.0375799		Rv3179	3547618	3548907	+	Rv3179	Conserved protein	Comments=Rv3179, (MTV014.23), len: 429 aa. Conserved protein, highly similar to Q9KH61 putative ATP/GTP binding protein from Mycobacterium smegmatis (428 aa), FASTA scores: opt: 2466, E(): 1.5e-148, (89.7% identity in 428 aa overlap) (no article found on the NCBI web site (July 2001))	UniProt_AC=O53329	Is_Pseudogene=No	conserved hypotheticals		SUBFAMILY NOT MED (PTHR43566:SF2)
RVBD_3194c	Rv3194c	-1.76805	0.0125769	0.049778	13.8822	18.1459	88.7875	22.6822	35.8744	0.708487	-2.49553							Rv3194c	3563264	3564286	-	Rv3194c	Possible conserved secreted protein	Comments=Rv3194c, (MTV014.38c), len: 340 aa. Possible conserved secreted protein (N-terminal stretch hydrophobic), equivalent to Q9CCM7|ML0643 putative secreted protein from Mycobacterium leprae (340 aa), FASTA scores: opt: 1822, E(): 1.6e-102, (80.3% identity in 340 aa overlap). Also similar to other proteins e.g. Q9FCI6|2SC3B6.26 putative secreted protein from Streptomyces coelicolor (364 aa), …	UniProt_AC=O53340	Is_Pseudogene=No	cell wall and cell processes			serine protease, adhesin (DOI: 10.1016/j.micpath.2020.104498)(https://doi.org/10.1016/j.tube.2019.101880)
RVBD_3216	Rv3216	-1.69071	1.08471e-05	0.00019553	68.7801	53.9149	215.627	181.457	129.945	0.384291	-4.39956		1.62054	7.3452	0.000171459	0.00114788
RVBD_3217c	Rv3217c	-3.68095	2.21172e-10	8.18573e-09	6.3101	5.89928	101.471	56.7054	42.5965	0.580055	-6.34587		3.60723	4.17738	1.87023e-05	0.000170824		Rv3217c	3593804	3594235	-	Rv3217c	Probable conserved integral membrane protein	Comments=Rv3217c, (MTCY07D11.09), len: 143 aa. Probable conserved integral membrane protein, equivalent (highly similar but shorter 30 aa) to Q9CCH6|ML0806 putative membrane protein from Mycobacterium leprae (173 aa). Also similar to others e.g. Q9F3L9|2SC7G11.04 putative integral membrane protein from Streptomyces coelicolor (152 aa), FASTA scores: opt: 177, E(): 0.00024, (33.8% identity in 136 …	UniProt_AC=O05849	Is_Pseudogene=No	cell wall and cell processes
RVBD_3220c	Rv3220c	-2.41961	4.38612e-10	1.58951e-08	54.7176	92.7456	380.518	408.279	234.065	0.387782	-6.23963		2.34341	8.23203	3.95011e-10	1.21318e-08		Rv3220c	3596029	3597534	-	Rv3220c	Probable two component sensor kinase	Comments=Rv3220c, (MTCY07D11.06), len: 501 aa. Probable sensor (probably histidine kinase), equivalent to Q9CCH8|ML0803 putative two-component system sensor kinase from Mycobacterium leprae (500 aa). Similar to others e.g. Q9F3M1|2SC7G11.01 putative histidine kinase (fragment) from Streptomyces coelicolor (372 aa), FASTA scores: opt: 1038, E(): 7.4e-56, (48.95% identity in 380 aa overlap)	UniProt_AC=O05846	Is_Pseudogene=No	regulatory proteins			carbon-source responsive, Cyclic di-GMP, Cu, NO sensor (https://doi.org/10.1096/fj.202002537RR)( DOI: 10.7554/eLife.65351); TCS
RVBD_3226c	Rv3226c	-3.97724	6.63706e-13	3.0382e-11	4.95794	6.422	88.7875	90.7286	47.724	0.553416	-7.18671		3.89972	4.24593	7.05661e-07	1.03203e-05		Rv3226c	3602564	3603322	-	Rv3226c	Conserved hypothetical protein	Comments=Rv3226c, (MTCY20B11.01c), len: 252 aa. Conserved hypothetical protein, similar to various hypothetical bacterial proteins e.g. Q9CCI2|ML0793 putative bacteriophage protein from Mycobacterium leprae (252 aa), FASTA scores: opt: 1183, E(): 3.8e-68, (70.65% identity in 252 aa overlap)	UniProt_AC=O05872	Is_Pseudogene=No	conserved hypotheticals		EMBRYONIC STEM CELL-SPECIFIC 5-HYDROXYMETHYLCYTOSINE-BINDING PROTEIN (PTHR13604:SF0)
RVBD_3240c	Rv3240c	-2.48701	0.00171765	0.0119275	5.94953	6.87005	38.0518	34.0232	21.2236	0.793267	-3.13515							Rv3240c	3617682	3620531	-	secA1	Probable preprotein translocase SecA1 1 subunit	Comments=Rv3240c, (MTCY20B11.15c), len: 949 aa. Probable secA1, preprotein translocase subunit, component of secretion apparatus (see citations below), highly similar to many e.g. P57996|SEA1_MYCLE from Mycobacterium leprae (940 aa), FASTA scores: opt: 5044, E(): 0, (87.5% identity in 849 aa overlap)	UniProt_AC=P0A5Y8	Is_Pseudogene=No	cell wall and cell processes			housekeeping SecA for protein export (DOI 10.1074/jbc.M900325200)
RVBD_3263	Rv3263	-1.30184	0.00342408	0.0201478	44.7116	47.5676	114.155	113.411	79.9613	0.444793	-2.92686							Rv3263	3643177	3644838	+	Rv3263	Probable DNA methylase (modification methylase) (methyltransferase)	Comments=Rv3263, (MTCY71.03), len: 553 aa. Probable DNA methylase, equivalent to Q9CCK4|ML0756 probable DNA methylase from Mycobacterium leprae (555 aa), FASTA scores: opt: 2980, E(): 2.1e-184, (81.9% identity in 541 aa overlap). Also similar to others e.g. P25240|MT57_ECOLI|ECO57IM modification methylase from Escherichia coli (544 aa), FASTA scores: opt: 595, E(): 1e-30, (30.35% identity in 507 …	UniProt_AC=P96868	Is_Pseudogene=No	information pathways			mamA; required under hypoxia (https://doi.org/10.1371/journal.ppat.1003419)
RVBD_3272	Rv3272	-1.86186	0.00535774	0.0272111	24.0685	18.0712	25.3678	124.752	48.0649	0.668605	-2.7847		1.79775	5.58315	0.0112248	0.035771		Rv3272	3653448	3654632	+	Rv3272	Conserved hypothetical protein	Comments=Rv3272, (MTCY71.12), len: 394 aa. Conserved hypothetical protein, similar to various proteins e.g. Q9I672|PA0446 hypothetical protein from Pseudomos aeruginosa (407 aa), FASTA scores: opt: 643, E(): 6.8e-32, (33.15% identity in 389 aa overlap)	UniProt_AC=P96877	Is_Pseudogene=No	conserved hypotheticals			novel Family III CoA transferase that alters the cell wall lipid profile and protects mycobacteria from acidic and oxidative stress (https://doi.org/10.1016/j.bbapap.2018.10.011)
RVBD_3302c	Rv3302c	-3.75679	0.0102078	0.0424798	1.26202	0.522721	12.6839	11.3411	6.45244	1.46252	-2.56871							Rv3302c	3687685	3689442	-	glpD2	Probable glycerol-3-phosphate dehydrogenase GlpD2	Comments=Rv3302c, (MTCI418A.04c, MTV016.01c), len: 585 aa. Probable glpd2, glycerol-3-phosphate dehydrogenase, equivalent to P53435|GLPD_MYCLE|ML0713|L308_C1_179 glycerol-3-phosphate dehydrogenase from Mycobacterium leprae (585 aa), FASTA scores: opt: 3489, E(): 2.2e-198, (90.75% identity in 584 aa overlap). Also highly similar to many e.g. Q9L0I3|SCD63.06 from Streptomyces coelicolor (568 aa), F…	UniProt_AC=P64184	Is_Pseudogene=No	intermediary metabolism and respiration			Central C metabolism and possibly cofactor metabolism (MycoBrowser)
RVBD_3303c	Rv3303c	-2.20624	0.00564398	0.0283903	7.21155	18.8926	76.1035	45.3643	36.893	0.797116	-2.76778		2.12164	4.89365	0.00860185	0.0288332		Rv3303c	3689457	3690938	-	lpdA	NAD(P)H quinone reductase LpdA	Comments=Rv3303c, (MTV016.02c), len: 493 aa. Probable lpdA, quinone reductase, similar to e.g. Q9EWV3|2SCK31.22c putative oxidoreductase from Streptomyces coelicolor (475 aa), FASTA scores: opt: 1420, E(): 2.4e-77, (54.9% identity in 471 aa overlap)	UniProt_AC=O53355	Is_Pseudogene=No	intermediary metabolism and respiration
RVBD_3311	Rv3311	-1.67265	1.90926e-12	8.40801e-11	176.503	176.157	532.725	589.736	368.78	0.23756	-7.04096		1.60026	9.08144	9.67374e-07	1.31317e-05		Rv3311	3698121	3699383	+	Rv3311	Conserved protein	Comments=Rv3311, (MTV016.10), len: 420 aa. Conserved protein, equivalent to Mycobacterium leprae hypothetical proteins Q9CCL8|ML0703 (423 aa), FASTA scores: opt: 2185, E(): 5.5e-120, (77.55% identity in 423 aa overlap)	UniProt_AC=O53362	Is_Pseudogene=No	conserved hypotheticals			SecA2 associated SatS; a protein (sapM; virulence factor) export chaperone (https://doi.org/10.7554/eLife.40063.001)
RVBD_3318	Rv3318	-1.57235	0.00267952	0.0169597	26.232	34.1262	88.7875	90.7286	59.9686	0.523717	-3.0023		1.49795	6.07345	0.0134009	0.0416257		Rv3318	3705000	3706772	+	sdhA	Probable succinate dehydrogenase (flavoprotein subunit) SdhA (succinic dehydrogenase) (fumarate reductase) (fumarate dehydrogenase) (fumaric hydrogenase)	Comments=Rv3318, (MTV016.18), len: 590 aa. Probable sdhA, flavoprotein of succinate dehydrogenase SdhA subunit, equivalent to Q9CCM1|SDHA|ML0697 succinate dehydrogenase flavoprotein subunit from Mycobacterium leprae (584 aa), FASTA scores: opt: 3657, E(): 1.2e-217, (92.55% identity in 590 aa overlap). Also highly similar to others e.g. Q9KZ90|DHSA from Streptomyces coelicolor (584 aa), FASTA scor…	UniProt_AC=O53370	Is_Pseudogene=No	intermediary metabolism and respiration
RVBD_3319	Rv3319	-2.63218	0.00366024	0.0208412	3.78606	5.89928	38.0518	22.6822	17.6048	0.905758	-2.90605							Rv3319	3706772	3707563	+	sdhB	Probable succinate dehydrogenase (iron-sulphur protein subunit) SdhB (succinic dehydrogenase) (fumarate reductase) (fumarate dehydrogenase) (fumaric hydrogenase)	Comments=Rv3319, (MTV016.19), len: 263 aa. Probable sdhB, iron-sulphur protein succinate dehydrogenase SdhB subunit , equivalent to Q49916|SDHB|ML0696|L308_F1_28 succinate dehydrogenase iron-sulfur protein from Mycobacterium leprae (264 aa), FASTA scores: opt: 1678, E(): 4.7e-99, (89.8% identity in 264 aa overlap). Also highly similar to other e.g. Q9KZ91|DHSB from Streptomyces coelicolor (257 aa…	UniProt_AC=O53371	Is_Pseudogene=No	intermediary metabolism and respiration
RVBD_3323c	Rv3323c	-2.23348	0.00820936	0.0363364	5.76924	9.40898	25.3678	45.3643	21.4776	0.844947	-2.64334							Rv3323c	3709049	3709714	-	moaX	Probable MoaD-MoaE fusion protein MoaX	Comments=Rv3323c, (MTV016.23c), len: 221 aa. Probable moaX, MoaD-MoaE fusion protein, similar (whole or partial) to several MoaD and MoaE proteins e.g. Q9RR88|DR2607 molybdenum cofactor biosynthesis protein D/E from Deinococcus radiodurans (229 aa), FASTA scores: opt: 407, E(): 1.8e-18, (32.75% identity in 223 aa overlap)	UniProt_AC=Q6MWY3	Is_Pseudogene=No	intermediary metabolism and respiration			biosynthesis of molybdenum cofactor
RVBD_3335c	Rv3335c	-4.38651	1.41436e-15	7.34413e-14	4.41707	5.37656	139.523	68.0465	54.3408	0.549399	-7.9842		4.31129	4.24428	7.91442e-08	1.5682e-06		Rv3335c	3721731	3722600	-	Rv3335c	Probable conserved integral membrane protein	Comments=Rv3335c, (MTV016.35c), len: 289 aa. Probable conserved integral membrane protein, equivalent to Q49909|ML0687 putative membrane protein U0308AA from Mycobacterium leprae (313 aa), FASTA scores: opt: 1299, E(): 8.9e-75, (68.75% identity in 288 aa overlap). Also similar to other hypothetical bacterial proteins e.g. BAB37825|ECS4402 from Escherichia coli strain O157:H7 (alias P37642|YHJD_EC…	UniProt_AC=O53385	Is_Pseudogene=No	cell wall and cell processes
RVBD_3354	Rv3354	-1.1617	0.00982277	0.0413722	68.9604	53.5416	101.471	170.116	98.5224	0.449921	-2.58201							Rv3354	3769111	3769500	+	Rv3354	Conserved hypothetical protein	Comments=Rv3354, (MTV004.11), len: 129 aa. Conserved hypothetical protein, equivalent (but shorter 29 aa) to Q9CCM4|ML0676 hypothetical protein from Mycobacterium leprae (158 aa), FASTA scores: opt: 467, E(): 3.3e-21, (55.9% identity in 127 aa overlaps). Highly similar to O33192|LPRJ|Rv1690|MTCI125.12 hypothetical protein from Mycobacterium tuberculosis (127 aa), FASTA scores: opt: 329, E(): 4.7e…	UniProt_AC=O50383	Is_Pseudogene=No	conserved hypotheticals
RVBD_3360	Rv3360	-3.9211	9.7706e-05	0.001214	1.44231	1.71751	25.3678	22.6822	12.8025	1.00639	-3.89622		3.83074	1.99415	0.00733192	0.0254802		Rv3360	3772651	3773019	+	Rv3360	Conserved hypothetical protein	Comments=Rv3360, (MTV004.17), len: 122 aa. Hypothetical protein, highly similar to the N-terminus of O65934|Rv1747|MTCY28.10|MTCY04C12.31 probable ABC-transporter ATP-binding protein from Mycobacterium tuberculosis (865 aa), FASTA scores: opt: 480, E(): 4.7e-25, (61.0% identity in 118 aa overlap)	UniProt_AC=O50389	Is_Pseudogene=No	conserved hypotheticals
RVBD_3419c	Rv3419c	-4.43244	1.04933e-06	2.38602e-05	1.17188	2.16556	50.7357	22.6822	19.1888	0.907886	-4.88215		4.33967	2.22344	0.000918512	0.00477121		Rv3419c	3837555	3838589	-	gcp	Probable O-sialoglycoprotein endopeptidase Gcp (glycoprotease)	Comments=Rv3419c, (MTCY78.10), len: 344 aa. Probable gcp, glycoprotease, equivalent to P37969|GCP_MYCLE|GCP|ML0379|U229E|U1620c|B229_C3_246|B1620_C3_226 probable glycoprotease from Mycobacterium leprae (351 aa), FASTA scores: opt: 1898, E(): 2.4e-101, (86.1% identity in 345 aa overlap). Highly similar to others e.g. O86793|GCP_STRCO|GCP|SC6G4.30 from Streptomyces coelicolor (374 aa), FASTA scores…	UniProt_AC=P65801	Is_Pseudogene=No	intermediary metabolism and respiration
RVBD_3428c	Rv3428c	-2.37831	0.0012302	0.00934466	8.56371	7.61679	50.7357	34.0232	25.2349	0.735913	-3.23178		2.30479	4.13525	0.0148727	0.045191		Rv3428c	3844738	3845970	-	Rv3428c	Possible transposase	Comments=Rv3428c, (MTCY78.01, len: 410 aa. Possible transposase insertion sequence, similar to others e.g. Q9APG9|ORF1 from Pseudomonas putida (509 aa), FASTA scores: opt: 578, E(): 1.1e-29, (32.45% identity in 376 aa overlap)	UniProt_AC=Q50700	Is_Pseudogene=No	insertion seqs and phages
RVBD_3447c	Rv3447c	-9.22396	0	0	46.8751	36.2918	23439.9	26231.9	12438.7	0.204294	-45.1504		9.15297	14.2873	4.01665e-112	9.86892e-109		Rv3447c	3864528	3868238	-	eccC4	ESX conserved component EccC4. ESX-4 type VII secretion system protein. Probable membrane protein.	Comments=Rv3447c, (MTCY77.19c), len: 1236 aa. EccC4, esx conserved component, ESX-4 type VII secretion system protein, probable membrane protein, similar to various bacterial proteins e.g. O86653|SC3C3.20c ATP/GTP binding protein from Streptomyces coelicolor (1321 aa), FASTA scores: opt: 1186, E(): 1.9e-60, (42.9% identity in 1312 aa overlap)	UniProt_AC=O06264	Is_Pseudogene=No	cell wall and cell processes			The tuberculosis necrotizing toxin (TNT) CpnT exporter; https://doi.org/10.1038/s41467-021-26925-1
RVBD_3450c	Rv3450c	-2.68083	7.52413e-08	1.95347e-06	20.2825	16.8017	76.1035	158.775	67.9907	0.498464	-5.37818		2.60955	5.78682	1.88577e-05	0.000170972		Rv3450c	3871084	3872496	-	eccB4	ESX conserved component EccB4. ESX-4 type VII secretion system protein. Probable membrane protein.	Comments=Rv3450c, (MTCY13E12.03c), len: 470 aa. EccB4, esx conserved component, ESX-4 type VII secretion system protein, probable membrane protein (possible membrane spanning region near N-terminus). Similar to hypothetical unknowns proteins from Mycobacterium leprae e.g. O33088|MLCB628.17C|ML0054 hypothetical 51.9 KDA protein (putative membrane protein)(481 aa), FASTA scores: opt: 708, E(): 6.4e…	UniProt_AC=O06317	Is_Pseudogene=No	cell wall and cell processes
RVBD_3466	Rv3466	-2.13549	1.67456e-09	5.8258e-08	57.4219	48.6131	202.943	260.845	142.456	0.354344	-6.02659		2.06467	7.39898	9.26235e-07	1.27137e-05		Rv3466	3883525	3884193	+	Rv3466	Conserved hypothetical protein	Comments=Rv3466, (MTCY13E12.19), len: 222 aa. Conserved hypothetical ORF in REP13E12 repeat, but extending 5' of repeat. Has segment of identity to other REP13E12 ORF's e.g. MTCY336.16, MTCI65.15c, MTCY09F9.19, cMTCY251.14c. This region is a possible MT-complex-specific genomic island (See Becq et al., 2007).	UniProt_AC=O06331	Is_Pseudogene=No	insertion seqs and phages			upregulated in dormany (https://doi.org/10.1016/j.meegid.2012.03.023)
RVBD_3467	Rv3467	-1.49754	3.09853e-05	0.000466262	91.4965	73.4796	202.943	260.845	157.191	0.359457	-4.1661		1.42765	7.72531	0.000370616	0.00219422		Rv3467	3883964	3884917	+	Rv3467	Conserved hypothetical protein	Comments=Rv3467, (MTCY13E12.20), len: 317 aa. Conserved hypothetical ORF in REP13E12 repeat, identical to ORF's from other REP13E12 copies e.g. MTCY251.13c, MTCI65.15c, MTCY09F9.19, cMTCY336.17. Also identical to Mycobacterium bovis Q50655 hypothetical 34.6 kDa protein (317 aa) in identical repeat.	UniProt_AC=Q50655	Is_Pseudogene=No	insertion seqs and phages
RVBD_3469c	Rv3469c	-1.70899	0.000506417	0.00468888	27.9447	34.4249	114.155	90.7286	66.8134	0.491465	-3.47734		1.63492	6.1884	0.00442125	0.0167419		Rv3469c	3886073	3887083	-	mhpE	Probable 4-hydroxy-2-oxovalerate aldolase MhpE (HOA)	Comments=Rv3469c, (MTCY13E12.22c), len: 336 aa. Probable mhpE, 4-hydroxy-2-oxovalerate aldolase, similar to others (principally from Pseudomonas species) e.g. Q99PZ1|SCP1.301|SCP1.53c from Streptomyces coelicolor (338 aa), FASTA scores: opt: 615, E(): 7.9e-31, (37.65% identity in 332 aa overlap)	UniProt_AC=O06334	Is_Pseudogene=No	intermediary metabolism and respiration			oxaloacetate decarboxylase activity (doi: 10.1021/bi400351h)
RVBD_3470c	Rv3470c	-3.62379	1.69157e-57	2.55869e-55	62.3799	68.8498	837.139	782.534	437.726	0.226734	-15.9825		3.55143	9.21823	5.13114e-26	4.50257e-24		Rv3470c	3887144	3888802	-	ilvB2	Probable acetolactate synthase (large subunit) IlvB2 (AHAS) (acetohydroxy-acid synthase large subunit) (ALS)	Comments=Rv3470c, (MTCY13E12.23c), len: 552 aa. Probable ilvB2, acetolactate synthase large subunit, similar to others e.g. P73913|ILVG|SLR2088 from Synechocystis sp. strain PCC 6803 (621 aa), FASTA scores: opt: 779, E(): 4.5e-39, (30.7% identity in 567 aa overlap)	UniProt_AC=O06335	Is_Pseudogene=No	intermediary metabolism and respiration			Involved in valine and isoleucine biosynthesis; branched chain amino acid metabolism
RVBD_3471c	Rv3471c	-1.83817	0.00912059	0.0391252	12.6202	13.9641	25.3678	68.0465	29.9997	0.704954	-2.6075							Rv3471c	3888808	3889341	-	Rv3471c	Conserved hypothetical protein	Comments=Rv3471c, (MTCY13E12.24c), len: 177 aa. Conserved hypothetical protein, similar to Q59013|MJ1618 hypothetical protein from Methanococcus janschii (125 aa), FASTA scores: opt: 262, E(): 1.2e-09, (39.05% identity in 105 aa overlap)	UniProt_AC=O06336	Is_Pseudogene=No	conserved hypotheticals		SUBFAMILY NOT MED (PTHR36114:SF8)
RVBD_3481c	Rv3481c	-2.3883	0.00747243	0.0340436	4.59736	6.79537	25.3678	34.0232	17.696	0.892816	-2.67502							Rv3481c	3900493	3901182	-	Rv3481c	Probable integral membrane protein	Comments=Rv3481c, (MTCY13E12.34c), len: 229 aa. Probable integral membrane protein. No real similarity with others.	UniProt_AC=O06344	Is_Pseudogene=No	cell wall and cell processes
RVBD_3484	Rv3484	-5.46215	1.10444e-143	3.84234e-141	378.156	511.968	19419.1	19824.2	10033.4	0.214012	-25.5227		5.38787	13.9766	2.97366e-55	5.62021e-53		Rv3484	3903078	3904616	+	cpsA	Possible conserved protein CpsA	Comments=Rv3484, (MTCY13E12.37), len: 512 aa. Possible cpsA, hypothetical protein, equivalent to Q50160|CPSA|ML2247 hypothetical protein CPSA from Mycobacterium leprae (516 aa), FASTA scores: opt: 2557, E(): 1.6e-143, (74.9% identity in 518 aa overlap)	UniProt_AC=O06347	Is_Pseudogene=No	conserved hypotheticals		SUBFAMILY NOT MED (PTHR33392:SF6)	cell wall assembly; decreased arabinogalactan levels in the bacterial cell wall (https://doi.org/10.1128/IAI.03081-14)
RVBD_3504	Rv3504	-1.63963	0.000297046	0.00303057	38.2212	34.9476	126.839	102.07	75.5194	0.453204	-3.61786		1.56836	6.42717	0.00424516	0.0161962		Rv3504	3922471	3923673	+	fadE26	Probable acyl-CoA dehydrogenase FadE26	Comments=Rv3504, (MTV023.11), len: 400 aa. Probable fadE26, acyl-CoA dehydrogenase, similar to other acyl-CoA dehydrogenases from Mycobacterium tuberculosis e.g. P71858|FADE29|Rv3543c|MTCY03C7.13 (387 aa) FASTA scores: opt: 1031, E(): 7.5e-59, (46.25% identity in 402 aa overlap)	UniProt_AC=O53549	Is_Pseudogene=No	lipid metabolism			cholesterol degradation (https://doi.org/10.1128/JB.00502-13)
RVBD_3511	Rv3511	-1.91211	0.0001517	0.00175921	40.2044	26.3601	101.471	147.434	78.8675	0.504746	-3.78827		1.84443	6.40452	0.000874065	0.00456932		Rv3511	3939617	3941761	+	PE_PGRS55	PE-PGRS family protein PE_PGRS55	Comments=Rv3511, (MTV023.18), len: 714 aa. PE_PGRS55, Member of the Mycobacterium tuberculosis PE family, PGRS subfamily of gly-rich proteins (see Brennan and Delogu, 2002), similar to others from Mycobacterium tuberculosis strains H37Rv and CDC1551 e.g. AAK47974|MT3615.3 (1217 aa) FASTA scores: opt: 2563, E(): 1.5e-94, (59.65% identity in 773 aa overlap)	UniProt_AC=Q6MWW8	Is_Pseudogene=No	PE/PPE
RVBD_3512	Rv3512	-9.56163	3.53566e-122	9.46197e-120	9.37501	6.7207	3843.23	8290.33	3037.41	0.406773	-23.5061		9.49165	12.2247	1.59212e-80	7.82368e-78		Rv3512	3941724	3944963	+	PE_PGRS56	PE-PGRS family protein PE_PGRS56	Comments=Rv3512, (MTV023.19), len: 1079 aa. PE_PGRS56, Member of the Mycobacterium tuberculosis PE family, PGRS subfamily of gly-rich proteins (see citation below), similar to others from Mycobacterium tuberculosis strains H37Rv and CDC1551 e.g. AAK47974|MT3615.3 (1217 aa) FASTA scores: opt: 3688, E(): 4.5e-130, (53.95% identity in 1136 aa overlap)	UniProt_AC=Q6MWW7	Is_Pseudogene=No	PE/PPE
RVBD_3519	Rv3519	-2.47118	0.000527528	0.00484241	7.57212	9.78235	63.4196	34.0232	28.6993	0.712902	-3.46637		2.3948	4.28304	0.00859436	0.0288332		Rv3519	3955550	3956260	+	Rv3519	Unknown protein	Comments=Rv3519, (MTV023.26), len: 236 aa (start uncertain). Unknown protein. The C-termil end is highly similar to N-termil end of AAK47980|MT3620 hypothetical 7.8 KDA protein from Mycobacterium tuberculosis strain CDC1551 (73 aa), FASTA scores: opt: 279, E(): 9.4e-12, (95.65% identity in 46 aa overlap).	UniProt_AC=O53564	Is_Pseudogene=No	conserved hypotheticals			Acetoacetate decarboxylase family protein (http://networks.systemsbiology.net/mtb/genes/Rv3519)
RVBD_3523	Rv3523	-1.57614	0.00683165	0.0323805	23.708	20.4608	63.4196	68.0465	43.9087	0.58269	-2.70494							Rv3523	3959529	3960713	+	ltp3	Probable lipid carrier protein or keto acyl-CoA thiolase Ltp3	Comments=Rv3523, (MTCY03C7.33c), len: 394 aa. Probable ltp3, lipid carrier protein or keto acyl-CoA thiolase, similar to several e.g. O30037|AF0202 3-ketoacyl-CoA thiolase (ACAB-6) from Archaeoglobus fulgidus (380 aa) FASTA scores: opt: 782, E(): 1.7e-40, (38.35% identity in 386 aa overlap)	UniProt_AC=P71878	Is_Pseudogene=No	lipid metabolism
RVBD_3556c	Rv3556c	-2.88977	8.20984e-10	2.94454e-08	24.4291	18.818	101.471	215.481	90.0497	0.470584	-6.14082		2.82003	6.27157	2.8749e-07	4.70909e-06		Rv3556c	3995804	3996964	-	fadA6	Probable acetyl-CoA acetyltransferase FadA6 (acetoacetyl-CoA thiolase)	Comments=Rv3556c, (MTCY06G11.03), len: 386 aa. Probable fadA6, acetyl-CoA acetyltransferase, similar to many e.g. Q9K409|2SCG61.06c from Streptomyces coelicolor (389 aa), FASTA scores: opt: 1091, E(): 2.9e-58, (48.1% identity in 399 aa overlap)	UniProt_AC=P96838	Is_Pseudogene=No	lipid metabolism			cholesterol degradation (https://doi.org/10.1093/femspd/fty021)
RVBD_3576	Rv3576	-2.35212	0.000811393	0.00672104	8.38342	10.3051	38.0518	56.7054	28.3614	0.702359	-3.34888		2.27647	4.37267	0.0099362	0.0322927		Rv3576	4018358	4019071	+	lppH	Possible conserved lipoprotein LppH	Comments=Rv3576, (MTCY06G11.23), len: 237 aa. Possible lppH, conserved lipoprotein, similar in part with proteins from Mycobacterium tuberculosis	UniProt_AC=Q7D589	Is_Pseudogene=No	cell wall and cell processes
RVBD_3577	Rv3577	-1.77971	0.00797937	0.0356815	18.3894	12.9934	50.7357	56.7054	34.706	0.670842	-2.65294							Rv3577	4019262	4020128	+	Rv3577	Conserved hypothetical protein	Comments=Rv3577, (MTCY06G11.24), len: 288 aa (other start sites possible upstream	UniProt_AC=P96859	Is_Pseudogene=No	conserved hypotheticals
RVBD_3584	Rv3584	-1.81829	0.0119425	0.048088	12.6202	11.1265	38.0518	45.3643	26.7907	0.723314	-2.51384							Rv3584	4025830	4026378	+	lpqE	Possible conserved lipoprotein LpqE	Comments=Rv3584, (MTV024.02), len: 182 aa. Possible lpqE, conserved lipoprotein, equivalent to Q9ZBM7|MLCB1450.02|LPQE|ML0319 putative lipoprotein from Mycobacterium leprae (183 aa), FASTA scores: opt: 722, E(): 6.2e-37, (63.45% identity in 175 aa overlap). Also similar in part to Q9KK69 exported protein 996A010 (fragment) from Mycobacterium avium (41 aa), FASTA scores: opt: 180, E(): 0.00012, (6…	UniProt_AC=P65308	Is_Pseudogene=No	cell wall and cell processes
RVBD_3589	Rv3589	-2.37235	0.000246331	0.00261276	17.1274	10.9025	101.471	45.3643	43.7164	0.647115	-3.66604		2.30042	5.06928	0.00187992	0.00844416		Rv3589	4030493	4031407	+	mutY	Probable adenine glycosylase MutY	Comments=Rv3589, (MTV024.07), len: 304 aa. Probable mutY, adenine glycosylase (see citation below), equivalent to Q9CBJ0|MUTY|ML1920 probable DNA glycosylase from Mycobacterium leprae (297 aa), FASTA scores: opt: 1592, E(): 2.6e-94, (74.9% identity in 303 aa overlap). Also similar to many DNA glycosylases (generally adenine glycosylases) e.g. Q9S6T7|SCE94.06 from Streptomyces coelicolor (308 aa),…	UniProt_AC=O53574	Is_Pseudogene=No	information pathways			oxidative DNA repair (https://doi.org/10.1073/pnas.2006792117)
RVBD_3590c	Rv3590c	-2.31096	4.175e-05	0.00060269	27.2236	18.1459	63.4196	158.775	66.8911	0.563983	-4.09758		2.24492	5.93802	0.000241114	0.00153874		Rv3590c	4031404	4033158	-	PE_PGRS58	PE-PGRS family protein PE_PGRS58	Comments=Rv3590c, (MTV024.08c, MTCY6F7.04), len: 584 aa. PE_PGRS58, Member of the Mycobacterium tuberculosis PE family, PGRS subfamily of gly-rich proteins (see citation below), highly similar to e.g. O53439|Rv1091|MTV017.44 (853 aa), FASTA scores: opt: 2005, E(): 1.4e-70, (54.95% identity in 646 aa overlap).	UniProt_AC=Q7D580	Is_Pseudogene=No	PE/PPE
RVBD_3613c	Rv3613c	-6.4509	2.0383e-06	4.51671e-05	0.270433	0.149349	25.3678	11.3411	9.28218	1.3582	-4.74959							Rv3613c	4053881	4054042	-	Rv3613c	Hypothetical protein	Comments=Rv3613c, (MTCY07H7B.09), len: 53 aa. Hypothetical unknown protein.	UniProt_AC=O06270	Is_Pseudogene=No	conserved hypotheticals			Virulence (doi:10.1371/journal.pone.0011066)
RVBD_3615c	Rv3615c	-1.44016	0.0068862	0.0325062	27.3137	34.3502	76.1035	90.7286	57.124	0.532941	-2.7023							Rv3615c	4054812	4055123	-	espC	ESX-1 secretion-associated protein EspC	Comments=Rv3615c, (MTCY07H7B.07), len: 103 aa. EspC, ESX-1 secretion-associated protein, equivalent to Q49723|ML0406|B1620_C2_214|MLCL383 hypothetical 11.1 KDA protein from Mycobacterium leprae (106 aa), FASTA scores: opt: 364, E(): 4.1e-18, (60.85% identity in 92 aa overlap). Also shows similarity to P96212|Rv3865|MTCY01A6.03 hypothetical 10.6 KDA protein from Mycobacterium tuberculosis (103 aa)…	UniProt_AC=P65087	Is_Pseudogene=No	cell wall and cell processes
RVBD_3638	Rv3638	-2.74002	1.21105e-07	3.09796e-06	13.9724	12.9187	88.7875	90.7286	51.6018	0.517784	-5.29182		2.66702	5.18653	7.99993e-05	0.000599386		Rv3638	4076984	4077730	+	Rv3638	Possible transposase	Comments=Rv3638, (MTCY15C10.14c), len: 248 aa. Possible transposase, highly similar to Q9RLQ8|ISTB ISTB protein from Mycobacterium bovis (266 aa), FASTA scores: opt: 784, E(): 4e-46, (78.0% identity in 259 aa overlap)	UniProt_AC=O06369	Is_Pseudogene=No	insertion seqs and phages
RVBD_3666c	Rv3666c	-3.86882	1.8123e-05	0.000301934	2.07332	2.01621	25.3678	34.0232	15.8702	0.902488	-4.28684		3.78396	2.35229	0.00524433	0.0192894		Rv3666c	4105459	4107084	-	dppA	Probable periplasmic dipeptide-binding lipoprotein DppA	Comments=Rv3666c, (MTV025.014c), len: 541 aa. Probable dppA, dipeptide-binding lipoprotein component of dipeptide transport system (see citation below), similar to many substrate-binding proteins e.g. Q9F353|SC9E12.02 putative peptide transport system secreted peptide-binding protein from Streptomyces coelicolor (544 aa), FASTA scores: opt: 1200, E(): 9e-67, (39.2% identity in 538 aa overlap)	UniProt_AC=O69634	Is_Pseudogene=No	cell wall and cell processes			Fe homeostasis (https://doi.org/10.1038/s41467-019-12109-5)
RVBD_3684	Rv3684	-1.59271	0.00946037	0.0401864	18.5697	21.2822	76.1035	45.3643	40.33	0.613771	-2.59495							Rv3684	4125439	4126479	+	Rv3684	Probable lyase	Comments=Rv3684, (MTV025.032), len: 346 aa. Probable lyase , and more specifically a cysteine synthase, highly similar to many lyases e.g. Q9K3N2|SCG20A.08c putative lyase from Streptomyces coelicolor (374 aa), FASTA scores: opt: 1469, E(): 3.7e-85, (63.35% identity in 341 aa overlap) (shorter 31 aa at N-terminus)	UniProt_AC=O69652	Is_Pseudogene=No	intermediary metabolism and respiration			(Cds1) as an H2S-producing enzyme in Mtb;PMID: 34439535
RVBD_3689	Rv3689	-1.09188	0.0123756	0.0491925	54.0866	58.5447	139.523	102.07	88.5561	0.436535	-2.50125							Rv3689	4130357	4131712	+	Rv3689	Probable conserved transmembrane protein	Comments=Rv3689, (MTV025.037), len: 451 aa. Probable conserved transmembrane protein, with Proline rich N-terminus, similar to Q9KYW6|SCE33.17 putative integral membrane protein from Streptomyces coelicolor (462 aa) FASTA scores: opt: 730, E(): 2.7e-21, (38.1% identity in 412 aa overlap).	UniProt_AC=O69657	Is_Pseudogene=No	cell wall and cell processes			Mycobacterium tuberculosis cAMP receptor protein (CRPMt);doi: 10.1093/nar/gku548
RVBD_3694c	Rv3694c	-2.55894	1.64873e-11	6.74814e-10	32.8125	30.3925	215.627	158.775	109.402	0.379993	-6.73417		2.48764	6.7569	3.41947e-07	5.31749e-06		Rv3694c	4136122	4137114	-	Rv3694c	Possible conserved transmembrane protein	Comments=Rv3694c, (MTV025.042c), len: 330 aa. Possible conserved transmembrane protein, highly similar to Q9KZM4|SCE34.01c putative integral membrane protein from Streptomyces coelicolor (335 aa), FASTA scores: opt: 1113, E(): 2.5e-60, (51.5% identity in 334 aa overlap)	UniProt_AC=O69662	Is_Pseudogene=No	cell wall and cell processes
RVBD_3703c	Rv3703c	-2.4685	2.91582e-05	0.000446879	23.3474	13.8148	139.523	68.0465	61.183	0.590558	-4.17994		2.39739	5.64012	0.000212889	0.00137288		Rv3703c	4145614	4146891	-	Rv3703c	Conserved hypothetical protein	Comments=Rv3703c, (MTV025.051c), len: 425 aa. Conserved hypothetical protein, similar to other hypothetical proteins e.g. Q9RD00|SCM1.44 from Streptomyces coelicolor (446 aa), FASTA scores: opt: 1480, E(): 1.4e-85, (53.9% identity in 421 aa overlap)	UniProt_AC=O69671	Is_Pseudogene=No	conserved hypotheticals		SUBFAMILY NOT MED (PTHR23150:SF26)	ergothioneine biosyntheiss egtB
RVBD_3709c	Rv3709c												5.67963	0.519065	0.0103334	0.0333476		Rv3709c	4152218	4153483	-	ask	Aspartokinase Ask (aspartate kinase) [contains: aspartokinase alpha subunit (Ask-alpha)	Comments=Rv3709c, (MTV025.057c), len: 421 aa. Ask, aspartokinase (see citation below), equivalent to Q9CB77|ask|ML2323 from Mycobacterium leprae (421 aa), FASTA scores: opt: 2531, E(): 2e-140, (92.65% identity in 421 aa overlap)	UniProt_AC=P0A4Z8	Is_Pseudogene=No	intermediary metabolism and respiration			amino acid metabolism
RVBD_3728	Rv3728	-1.32627	0.00127185	0.00956911	57.9628	65.5641	114.155	192.798	107.62	0.411598	-3.22226		1.25372	7.15299	0.00737024	0.0255412		Rv3728	4174873	4178070	+	Rv3728	Probable conserved two-domain membrane protein	Comments=Rv3728, (MTV025.076), len: 1065 aa. Probable conserved transmembrane protein organised into two domains. Domain comprising the first ~510 aa residues is similar to various multidrug resistance and efflux proteins and contains sugar transport protein signature 1 (PS00216). Domain corresponding to the last 550 aa residues contains cyclic nucleotide-binding domain signature 2 (PS00889) and …	UniProt_AC=O69695	Is_Pseudogene=No	cell wall and cell processes			Efflux pump (https://doi.org/10.1089/mdr.2009.0054)
RVBD_3731	Rv3731	-2.80737	9.63844e-18	5.68341e-16	45.5229	55.8565	418.57	294.868	203.704	0.327269	-8.57818		2.73355	7.90882	1.25912e-12	5.24349e-11		Rv3731	4181758	4182834	+	ligC	Possible ATP-dependent DNA ligase LigC (polydeoxyribonucleotide synthase [ATP]) (polynucleotide ligase [ATP]) (sealase) (DNA repair protein) (DNA joinase)	Comments=Rv3731, (MTV025.079), len: 358 aa. Possible ligC, DNA ligase ATP-dependent (see citation below), similar to numerous archaebacterial and eukaryotic polynucleotide DNA ligases e.g. Q9XAM3|SC4C6.17c from Streptomyces coelicolor (355 aa), FASTA scores: opt: 1429, E(): 1.7e-82, (60.4% identity in 361 aa overlap)	UniProt_AC=O69698	Is_Pseudogene=No	information pathways			DNA repair
RVBD_3733c	Rv3733c	-3.39983	2.67801e-22	1.90139e-20	25.9616	31.0646	367.834	238.163	165.756	0.350062	-9.71209		3.32574	7.39397	5.71239e-15	2.64818e-13		Rv3733c	4184012	4184512	-	Rv3733c	Conserved hypothetical protein	Comments=Rv3733c, (MTV025.081c), len: 166 aa. Conserved hypothetical protein, highly similar to Q9FCB0|2SCG58.03 putative mutt-like protein from Streptomyces coelicolor (153 aa), FASTA scores: opt: 541, E(): 7.2e-29, (52.7% identity in 148 aa overlap)	UniProt_AC=O69700	Is_Pseudogene=No	conserved hypotheticals		BIS(5'-NUCLEOSYL)-TETRAPHOSPHATASE [ASYMMETRICAL] (PTHR21340:SF0)	Nudix hydrolases (http://dx.doi.org/10.1128/JB.02102-12)
RVBD_3735	Rv3735	-1.43946	0.00350981	0.0201581	39.9339	60.9343	101.471	170.116	93.114	0.493109	-2.91916		1.36563	6.87749	0.00736754	0.0255412		Rv3735	4186089	4186577	+	Rv3735	Conserved hypothetical protein	Comments=Rv3735, (MTV025.083), len: 162 aa. Conserved hypothetical protein, highly similar to several bacterial hypothetical proteins e.g. Q9UX41|ORF-C09_016|SSO0651|AAK40956 from Sulfolobus solfataricus (163 aa), FASTA scores: opt: 627, E(): 1.2e-34, (55.9% identity in 161 aa overlap)	UniProt_AC=O69702	Is_Pseudogene=No	conserved hypotheticals		SUBFAMILY NOT MED (PTHR36155:SF1)
RVBD_3745c	Rv3745c	-3.43343	0.00136352	0.0100289	2.34375	3.06165	0	56.7054	15.5277	1.07219	-3.20226		3.35512	2.67723	0.0151221	0.0458137		Rv3745c	4195886	4196098	-	Rv3745c	Conserved hypothetical protein	Comments=Rv3745c, (MTV025.093c), len: 70 aa. Conserved hypothetical protein, highly similar to others e.g. N-terminus of Q9X4E6 hypothetical 13.4 KDA protein from Rhodobacter sphaeroides (Rhodopseudomos sphaeroides) (124 aa), FASTA scores: opt: 279, E(): 4.4e-14, (59.4% identity in 69 aa overlap)	UniProt_AC=O69712	Is_Pseudogene=No	conserved hypotheticals		SUBFAMILY NOT MED (PTHR37466:SF1)
RVBD_3751	Rv3751	-2.96399	0.00160144	0.0113934	2.70433	4.92851	25.3678	34.0232	16.756	0.939266	-3.15565							Rv3751	4198874	4199089	+	Rv3751	Probable integrase (fragment)	Comments=Rv3751, (MTV025.099), len: 71 aa. Probable integrase (fragment), similar to part of many e.g. Q48908 integrase (fragment) from Mycobacterium paratuberculosis (191 aa), FASTA scores: opt: 206, E(): 5.5e-08, (57.65% identity in 59 aa overlap)	UniProt_AC=O69718	Is_Pseudogene=No	insertion seqs and phages
RVBD_3759c	Rv3759c	-2.48184	0.00597335	0.0295175	3.96635	8.88626	38.0518	34.0232	21.2319	0.902737	-2.74924							Rv3759c	4204426	4205373	-	proX	Possible osmoprotectant (glycine betaine/carnitine/choline/L-proline) binding lipoprotein ProX	Comments=Rv3759c, (MTV025.107c), len: 315 aa. Possible proX, osmoprotectant-binding lipoprotein component of osmoprotectant transport system (see citation below), similar to osmoprotection proteins (proX) involved in glycine betaine/L-proline/choline transport, e.g. AAK79442|CAC1474 proline/glycine betaine ABC transport system periplasmic component from Clostridium acetobutylicum (303 aa), FASTA …	UniProt_AC=O69725	Is_Pseudogene=No	virulence, detoxification, adaptation			osmoprotectant Importer
RVBD_3772	Rv3772	-1.99635	0.00241393	0.0159054	17.2176	12.62	38.0518	79.3876	36.8192	0.658007	-3.03393		1.92757	5.03954	0.0135771	0.0420352		Rv3772	4217134	4218195	+	hisC2	Probable histidinol-phosphate aminotransferase HisC2 (imidazole acetol-phosphate transaminase) (imidazolylacetolphosphate aminotransferase)	Comments=Rv3772, (MTCY13D12.06), len: 353 aa. Probable hisC2, histidinol-phosphate aminotransferase, highly similar to Q9ZBY8|SCD78.11 putative histidinol-phophate aminotransferase from Streptomyces coelicolor (359 aa), FASTA scores: opt: 1165, E(): 7.1e-64, (52.55% identity in 356 aa overlap)	UniProt_AC=P72039	Is_Pseudogene=No	intermediary metabolism and respiration			histidine biogenesis
RVBD_3783	Rv3783	-3.27192	0.00137019	0.0100356	2.07332	2.83763	12.6839	34.0232	12.9045	1.0222	-3.20086							Rv3783	4229258	4230100	+	rfbD	Probable O-antigen/lipopolysaccharide transport integral membrane protein ABC transporter RfbD	Comments=Rv3783, (MTCY13D12.17), len: 280 aa. Probable rfbD, polysaccharide-transport integral membrane protein ABC transporter (see Braibant et al., 2000), involved in O-antigen/lipopolysaccharides (LPS) transport, equivalent to Q9CDA2|ML0112 putative ABC transporter component from Mycobacterium leprae (276 aa), FASTA scores: opt: 1646, E(): 4e-102, (84.3% identity in 280 aa overlap). Also highl…	UniProt_AC=P72049	Is_Pseudogene=No	cell wall and cell processes			Involved in the biosynthesis of the dTDP-L-rhamnose which is an important component of lipopolysaccharide (https://doi.org/10.3389/fcimb.2021.622487)
RVBD_3798	Rv3798	-1.63067	0.00205744	0.0139529	30.5589	30.7659	50.7357	136.093	62.0384	0.529128	-3.08181		1.55937	6.12562	0.01011	0.0327707		Rv3798	4252993	4254327	+	Rv3798	Probable transposase	Comments=Rv3798, (MTV026.03), len: 444 aa. Probable transposase for insertion sequence element IS1557, highly similar to Q60255 similar to transposase of ISAE1 from alcaligenes eutrophus H1-4 (fragment) from dibenzofuran-degrading bacterium DPO360 (163 aa) FASTA scores: opt: 767, E(): 3.2e-42, (67.25% identity in 168 aa overlap)	UniProt_AC=Q10621	Is_Pseudogene=No	insertion seqs and phages
RVBD_3814c	Rv3814c	-2.9182	2.50939e-05	0.000391487	7.21155	8.43821	25.3678	90.7286	32.9366	0.692508	-4.21395		2.84199	4.27201	0.00144664	0.00688836		Rv3814c	4279230	4280015	-	Rv3814c	Possible acyltransferase	Comments=Rv3814c, (MTCY409.16), len: 261 aa. Possible acyltransferase, highly similar to Q9CDC0|ML0087 putative acyltransferase from Mycobacterium leprae (257 aa), FASTA scores: opt: 753, E(): 7.7e-42, (46.75% identity in 246 aa overlap). Also highly similar to many acyltransferases and hypothetical proteins e.g. Q9K3R3|2SCG4.01 putative acyltransferase from Streptomyces coelicolor (242 aa), FAST…	UniProt_AC=O07809	Is_Pseudogene=No	intermediary metabolism and respiration			1-acylglycerol-3-phosphate O-acyltransferase activity (Uniprot)
RVBD_3817	Rv3817	-3.08429	1.44432e-05	0.000252502	6.03967	5.22721	38.0518	56.7054	26.506	0.711155	-4.33701		3.00814	3.74972	0.00265968	0.0111326		Rv3817	4281647	4282402	+	Rv3817	Possible phosphotransferase	Comments=Rv3817, (MTCY409.13c), len: 251 aa. Possible phosphotransferase, similar to many phosphotransferases e.g. O53023 kanamycin marker from Escherichia coli (264 aa), FASTA scores: opt: 232, E(): 7.5e-08, (32.4% identity in 247 aa overlap)	UniProt_AC=O07806	Is_Pseudogene=No	intermediary metabolism and respiration
RVBD_3818	Rv3818	-4.71099	1.62787e-41	2.02263e-39	11.3582	15.9803	342.466	374.256	186.015	0.349039	-13.497		4.6348	7.49301	1.42541e-27	1.34701e-25		Rv3818	4282449	4283999	+	Rv3818	Unknown protein	Comments=Rv3818, (MTCY409.12c), len: 516 aa. Unknown protein.	UniProt_AC=O07805	Is_Pseudogene=No	conserved hypotheticals			namH;Peptidoglycan structure (https://doi.org/10.3389/fmicb.2018.02341)
RVBD_3821	Rv3821	-1.29672	2.43971e-05	0.000384061	272.596	419.073	837.139	861.922	597.683	0.307258	-4.22031		1.22143	9.86231	0.000174418	0.00116137		Rv3821	4285973	4286686	+	Rv3821	Probable conserved integral membrane protein	Comments=Rv3821, (MTCY409.09c), len: 237 aa. Probable conserved integral membrane protein, equivalent to Q49630|ML1233|B1170_F2_64 hypothetical 24.4 KDA protein/INTEGRAL MEMBRANE PROTEIN (POTENTIAL) from Mycobacterium leprae (230 aa), FASTA scores: opt: 619, E(): 2.4e-32, (46.65% identity in 240 aa overlap). Shows some similarity to P29466|I1BC_HUMAN|CASP1|IL1BC|IL1BCE (404 aa), FASTA scores: opt…	UniProt_AC=O07802	Is_Pseudogene=No	cell wall and cell processes			sulfolipid exporter (https://doi.org/10.1016/j.cell.2020.02.026)
RVBD_3827c	Rv3827c	-2.06353	0.0126862	0.0499853	6.58054	10.6038	38.0518	34.0232	22.3148	0.827909	-2.49246							Rv3827c	4301563	4302789	-	Rv3827c	Possible transposase	Comments=Rv3827c, (MTCY409.03), len: 408 aa. Possible transposase within IS1537 element, similar to several transposases e.g. O83029|TNPC|DR2324|DR0666|DR0978|DR1381|DR1651|DR1933 transposase from Deinococcus radiodurans(408 aa) FASTA scores: opt: 302, E(): 3.9e-12, (30.75% identity in 358 aa overlap)	UniProt_AC=O07796	Is_Pseudogene=No	insertion seqs and phages
RVBD_3842c	Rv3842c	-1.35723	4.98026e-07	1.17866e-05	251.593	316.47	824.455	635.1	506.905	0.269984	-5.02707		1.28394	9.60318	7.0139e-05	0.000538536		Rv3842c	4314738	4315562	-	glpQ1	Probable glycerophosphoryl diester phosphodiesterase GlpQ1 (glycerophosphodiester phosphodiesterase)	Comments=Rv3842c, (MTCY01A6.27), len: 274 aa. Probable glpQ1, glycerophosphoryl diester phosphodiesterase, equivalent to Q9CDC5|GLPQ|ML0074 putative glycerophosphoryl diester phosphodiesterase from Mycobacterium leprae (271 aa), FASTA scores: opt: 1635, E(): 1.9e-100, (88.85% identity in 269 aa overlap). Also highly similar to others e.g. CAC44700|SCBAC25E3.13c putative phosphodiesterase from Str…	UniProt_AC=P96236	Is_Pseudogene=No	intermediary metabolism and respiration			recycling of phospholipids (PMID: 23801751), essential inside macrophages (PMID:18070897)
RVBD_3843c	Rv3843c	-2.70861	0.011638	0.0470251	2.16346	5.15254	25.3678	22.6822	13.8415	1.0736	-2.52293							Rv3843c	4315568	4316596	-	Rv3843c	Probable conserved transmembrane protein	Comments=Rv3843c, (MTCY01A6.26), len: 342 aa. Probable conserved transmembrane protein, equivalent to Q9CDC6|ML0073 putative membrane protein from Mycobacterium leprae (344 aa), FASTA scores: opt: 1420, E(): 2.6e-68, (63.05% identity in 349 aa overlap). A core mycobacterial gene	UniProt_AC=P96235	Is_Pseudogene=No	cell wall and cell processes
RVBD_3844	Rv3844	-3.68895	0.000163396	0.00187942	3.15505	1.49349	25.3678	34.0232	16.0099	0.97856	-3.76977		3.61234	2.48384	0.00422954	0.0161962		Rv3844	4318775	4319266	+	Rv3844	Possible transposase	Comments=Rv3844, (MTCY01A6.25), len: 163 aa. Possible transposase, identical to P96234|Rv3348|MTV004.04 putative transposase from Mycobacterium tuberculosis. Also some similarity with others e.g. N-terminal part of P19834|YI11_STRCL insertion element IS116 hypothetical 44.8 KDA protein from Streptomyces clavuligerus (399 aa) FASTA scores: opt: 146, E(): 0.017, (29.1% identity in 158 aa overlap).	UniProt_AC=P96234	Is_Pseudogene=No	insertion seqs and phages
RVBD_3850	Rv3850	-2.87787	0.000119394	0.0014225	4.95794	8.06484	50.7357	45.3643	27.2807	0.748009	-3.84737		2.79892	3.93421	0.00419328	0.0161234		Rv3850	4324015	4324671	+	Rv3850	Conserved protein	Comments=Rv3850, (MTCY01A6.18c), len: 218 aa. Conserved protein, equivalent to Q9CDD0|ML0068 hypothetical protein from Mycobacterium leprae (238 aa) FASTA scores: opt: 1071, E(): 7.2e-55, (78.35% identity in 217 aa overlap). A core mycobacterial gene	UniProt_AC=P96227	Is_Pseudogene=No	conserved hypotheticals
RVBD_3851	Rv3851	-3.36082	0.00141745	0.0103382	1.71274	2.98698	38.0518	11.3411	13.5231	1.05319	-3.19107							Rv3851	4324683	4324967	+	Rv3851	Possible membrane protein	Comments=Rv3851, (MTCY01A6.17c), len: 94 aa. Possible membrane protein.	UniProt_AC=P96226	Is_Pseudogene=No	cell wall and cell processes
RVBD_3862c	Rv3862c	-2.77177	9.76329e-06	0.000178195	8.56371	10.8278	88.7875	45.3643	38.3858	0.626764	-4.42235		2.69606	4.58866	0.000718096	0.00384392		Rv3862c	4338171	4338521	-	whiB6	Possible transcriptional regulatory protein WhiB-like WhiB6	Comments=Rv3862c, (MTCY01A6.06), len: 116 aa. Possible whiB6 (alternate gene name: whmF), WhiB-like regulatory protein (see citation below), similar to WhiB paralogue of Streptomyces coelicolor, wblE gene product (85 aa). Shows similarity with Q49765|WHIB7|ML0639|B1937_F2_68 putative transcriptional regulator WHIB7 from Mycobacterium leprae (89 aa) FASTA scores: opt: 112, E(): 0.49, (41.2% identi…	UniProt_AC=P96215	Is_Pseudogene=No	regulatory proteins			Regulator of Esx1 secretion and Dos regulon (doi: 10.1016/j.celrep.2016.07.080); upregulated in oxidative stress ( DOI: 10.1111/j.1365-2958.2012.08165.x, https://doi.org/10.1128/AAC.00295-06).
RVBD_3866	Rv3866	-1.78139	0.00322042	0.0195189	18.119	30.8405	101.471	68.0465	54.6194	0.604706	-2.94588		1.70261	5.80599	0.00782337	0.0266972		Rv3866	4341880	4342731	+	espG1	ESX-1 secretion-associated protein EspG1	Comments=Rv3866, (MTCY01A6.01c, MTV027.01), len: 283 aa. espG1, ESX-1 secretion-associated protein. N-terminal end highly similar to O33091|MLCB628.20c hypothetical 13.1 KDA protein from Mycobacterium leprae (122 aa), FASTA scores: opt: 260, E(): 2.1e-09, (43.6% identity in 117 aa overlap)	UniProt_AC=P96210	Is_Pseudogene=No	cell wall and cell processes			ESAT-6 secretion and virulence; DOI: 10.1111/j.1365-2958.2004.04261.x
RVBD_3868	Rv3868	-2.10752	2.6228e-06	5.77515e-05	29.6575	42.6391	164.891	147.434	96.1554	0.448567	-4.69834		2.03208	6.67867	6.2443e-05	0.000485514		Rv3868	4343314	4345035	+	eccA1	ESX conserved component EccA1. ESX-1 type VII secretion system protein.	Comments=Rv3868, (MTV027.03), len: 573 aa. EccA1, esx conserved component, ESX-1 type VII secretion system protein. Member of the CbxX/CfqX family of hypothetical proteins	UniProt_AC=O69733	Is_Pseudogene=No	cell wall and cell processes			ESAT-6 secretion and virulence; DOI: 10.1111/j.1365-2958.2004.04261.x
RVBD_3869	Rv3869	-1.50052	0.0111037	0.0452341	22.5361	28.6003	101.471	45.3643	49.493	0.590892	-2.53942							Rv3869	4345039	4346481	+	eccB1	ESX conserved component EccB1. ESX-1 type VII secretion system protein. Possible membrane protein.	Comments=Rv3869, (MTV027.04), len: 480 aa. EccB1, esx conserved component, ESX-1 type VII secretion system protein, possible membrane protein (has hydrophobic stretch near N-terminus), equivalent to O33088|ML0054|MLCB628.17c putative membrane protein from Mycobacterium leprae (481 aa), FASTA scores: opt: 2489, E(): 8.3e-136, (75.75% identity in 478 aa overlap)	UniProt_AC=O69734	Is_Pseudogene=No	cell wall and cell processes
RVBD_3871	Rv3871	-1.01763	0.00698886	0.0327046	83.8342	105.366	190.259	192.798	143.064	0.377266	-2.69737							Rv3871	4348827	4350602	+	eccCb1	ESX conserved component EccCb1. ESX-1 type VII secretion system protein.	Comments=Rv3871, (MTV027.06), len: 591 aa. EccCb1, esx conserved component, ESX-1 type VII secretion system protein, equivalent to Q9CDD7|ML0052 hypothetical protein from Mycobacterium leprae (597 aa) FASTA scores: opt: 3341, E(): 9.8e-192, (80.85% identity in 596 aa overlap)	UniProt_AC=O69736	Is_Pseudogene=No	cell wall and cell processes			RD1 locus; attenuated in THP1 macrophages( doi:10.1046/j.1365-2958.2003.03844.x), and in primates (https://doi.org/10.1086/652497)
RVBD_3880c	Rv3880c	-2.23569	0.00154285	0.0111361	8.744	14.1881	63.4196	45.3643	32.929	0.706043	-3.1665		2.15706	4.68051	0.00946586	0.0309277		Rv3880c	4360199	4360546	-	espL	ESX-1 secretion-associated protein EspL	Comments=Rv3880c, (MTV027.15c), len: 115 aa. EspL, ESX-1 secretion-associated protein, equivalent to O33080|ML0044|MLCB628.09 hypothetical 12.2 KDA protein from Mycobacterium leprae (113 aa), FASTA scores: opt: 397, E(): 2e-19, (56.35% identity in 110 aa overlap). A core mycobacterial gene	UniProt_AC=O69744	Is_Pseudogene=No	cell wall and cell processes
RVBD_3894c	Rv3894c	-1.64601	0.000602663	0.00543177	38.6719	33.6035	76.1035	147.434	73.9532	0.479829	-3.43041		1.57507	6.41089	0.0048575	0.0180831		Rv3894c	4376262	4380452	-	eccC2	ESX conserved component EccC2. ESX-2 type VII secretion system protein. Possible membrane protein.	Comments=Rv3894c, (MTCY15F10.18), len: 1396 aa. EccC2, esx conserved component, ESX-2 type VII secretion system protein, possible membrane protein (possible transmembrane segments from aa ~37-85), similar to Q9CD30|ML2535 hypothetical protein from Mycobacterium leprae (1329 aa), FASTA scores: opt: 652, E(): 2.2e-30, (27.85% identity in 1425 aa overlap)	UniProt_AC=O05450	Is_Pseudogene=No	cell wall and cell processes
