# Supplementary material for: Biosensor-integrated transposon mutagenesis reveals rv0158 as a coordinator of redox homeostasis in Mycobacterium tuberculosis
Source: eLife. 2023 Aug 29;12:e80218. doi: 10.7554/eLife.80218 (PMC10501769; doi:10.7554/eLife.80218)
Supplement: Supplementary file 3. [file elife-80218-supp3.xlsx]

## Sheet: All data+ classification
			DeSEQ2	EdgeR
	Gene	Locus Tag	log2FC (>1)	log2FC (>1)	GENE	PRODUCT	FUNCTIONAL CATEGORY			Function
	Redox homeostasis and Repair
1	RVBD_0046c	Rv0046c	-5.85794		ino1	myo-inositol-1-phosphate synthase Ino1 (inositol 1-phosphate synthetase) (D-glucose 6-phosphate cycloaldolase) (glucose 6-phosphate cyclase) (glucocycloaldolase)	intermediary metabolism and respiration
2	RVBD_0117	Rv0117	-4.52272	4.43625	oxyS	Oxidative stress response regulatory protein OxyS	regulatory proteins
3	RVBD_0134	Rv0134	-1.71721	1.64598	ephF	Possible epoxide hydrolase EphF (epoxide hydratase) (arene-oxide hydratase)	virulence, detoxification, adaptation
4	RVBD_0181c	Rv0181c	-1.00117		Rv0181c	Conserved hypothetical protein	conserved hypotheticals			anti-sigma factor G (rsgA, rv0181c),RsgA is encoded immediately downstream of sigma factor G (sigG)(http://dx.doi.org/10.1128/JB.01537-14); detoxifying enzyme (https://doi.org/10.1016/j.tube.2013.05.005)
5	RVBD_0186Ac	Rv0186Ac	-3.29258	3.21792	mymT					copper-binding metallothionein(https://doi.org/10.1038/nchembio.109)
6	RVBD_0410c	Rv0410c	-5.04911		pknG	Serine/threonine-protein kinase PknG (protein kinase G) (STPK G)	regulatory proteins			RHOCS;amino acid metabolism sensor; regulator of c and N metabolism(https://doi.org/10.1371/journal.ppat.1006399,https://doi.org/10.1021/acs.jcim.1c01358,https://doi.org/10.1016/j.jprot.2018.09.013)
7	RVBD_0413	Rv0413	-2.6907	2.61994	mutT3	Possible mutator protein MutT3 (7,8-dihydro-8-oxoguanine-triphosphatase) (8-oxo-dGTPase) (dGTP pyrophosphohydrolase)	information pathways			RHOCS;RenU nudix hydrolase
8	RVBD_0508	Rv0508	-3.15037	3.07376	Rv0508	Conserved hypothetical protein	conserved hypotheticals			Putative Mrx1 like protein
9	RVBD_0526	Rv0526	-3.80049		Rv0526	Possible thioredoxin protein (thiol-disulfide interchange protein)	intermediary metabolism and respiration
10	RVBD_0816c	Rv0816c	-5.85171	5.73771	thiX	Probable thioredoxin ThiX	intermediary metabolism and respiration			thioredoxin superfamily protein
11	RVBD_0991c	Rv0991c	-4.85624	4.78518	Rv0991c	Conserved serine rich protein	conserved hypotheticals		SUBFAMILY NOT MED (PTHR34404:SF2)	redox-regulated chaperones; oxidized Ruc promotes the protein-folding activity of the essential M. tuberculosis Hsp70 chaperone system. (doi: 10.1128/mBio.01545-20)
12	RVBD_1170	Rv1170	-4.8722	4.76632	mshB	N-acetyl-1-D-myo-inosityl-2-amino-2-deoxy-alpha-D-glucopyranoside deacetylase MshB (GlcNAc-Ins deacetylase)	intermediary metabolism and respiration
13	RVBD_1205	Rv1205	-1.70054		Rv1205	Conserved hypothetical protein	conserved hypotheticals		LOG FAMILY PROTEIN YJL055W (PTHR31223:SF11)	mycobacterial proteasomal substrate encoded by Rv1205, which appears to code for a homolog of the plant-like enzyme LONELY GUY, is responsible for proteasome-mediated nitric oxide resistance.(doi:10.1016/j.molcel.2015.01.024.)
14	RVBD_1210	Rv1210	-2.53056	2.45822	tagA	Probable DNA-3-methyladenine glycosylase I TagA (tag I) (3-methyladenine-DNA glycosylase I, constitutive) (DNA-3-methyladenine glycosidase I)	information pathways
15	RVBD_1557	Rv1557	-3.31297	3.23931	mmpL6	Probable conserved transmembrane transport protein MmpL6	cell wall and cell processes			oxidative stress response (https://doi.org/10.1093/infdis/jiy526)
16	RVBD_2633c	Rv2633c	-1.53453	1.46519	Rv2633c	Hypothetical protein	conserved hypotheticals		SUBFAMILY NOT MED (PTHR35585:SF2)	non-heme di-iron catalase(DOI 10.1074/jbc.RA117.000421)
17	RVBD_2873	Rv2873	-2.73913	2.66303	mpt83	Cell surface lipoprotein Mpt83 (lipoprotein P23)	cell wall and cell processes			Redox stress (https://doi.org/10.1038/s41467-019-12224-3)
18	RVBD_3005c	Rv3005c	-2.35349	2.28118	Rv3005c	Conserved hypothetical protein	conserved hypotheticals		INNER MEMBRANE PROTEIN YPHA-RELATED (PTHR33452:SF1)	DoxX; membrane oxidoreductase complex (MRC) that is physically coupled to SodA (Nambi et al)
19	RVBD_3053c	Rv3053c	-3.99063	3.9091	nrdH	Probable glutaredoxin electron transport component of NRDEF (glutaredoxin-like protein) NrdH	information pathways			Putative Mrx1 like protein (Ashima, PlosPath)
20	RVBD_3056	Rv3056	-2.21201	2.13697	dinP	Possible DNA-damage-inducible protein P DinP (DNA polymerase V) (pol IV 2) (DNA nucleotidyltransferase (DNA-directed))	information pathways
21	RVBD_3177	Rv3177	-10.0162	9.88824	Rv3177	Possible peroxidase (non-haem peroxidase)	virulence, detoxification, adaptation			peroxidase
22	RVBD_3178	Rv3178	-2.12463		Rv3178	Conserved hypothetical protein	conserved hypotheticals		SUBFAMILY NOT MED (PTHR39428:SF3)	Putative F420H(2)-dependent quinone reductase Rv3178; Involved in a F420-dependent anti-oxidant mechanism that protects M.tuberculosis against oxidative stress and bactericidal agents; Uniprot (https://doi.org/10.1073/pnas.2025172118); Ddn
23	RVBD_3589	Rv3589	-2.37235	2.30042	mutY	Probable adenine glycosylase MutY	information pathways			oxidative DNA repair (https://doi.org/10.1073/pnas.2006792117)
24	RVBD_3684	Rv3684	-1.59271		Rv3684	Probable lyase	intermediary metabolism and respiration			(Cds1) as an H2S-producing enzyme in Mtb;PMID: 34439535
25	RVBD_3703c	Rv3703c	-2.4685	2.39739	Rv3703c	Conserved hypothetical protein	conserved hypotheticals		SUBFAMILY NOT MED (PTHR23150:SF26)	ergothioneine biosyntheiss egtB
26	RVBD_3731	Rv3731	-2.80737	2.73355	ligC	Possible ATP-dependent DNA ligase LigC (polydeoxyribonucleotide synthase [ATP]) (polynucleotide ligase [ATP]) (sealase) (DNA repair protein) (DNA joinase)	information pathways			DNA repair
27	RVBD_2971	Rv2971	-4.08531	3.99819	Rv2971	Probable oxidoreductase	intermediary metabolism and respiration			Aldo-keto reductases (AKR) are a large superfamily of NADPH-dependent oxidoreductases and play a role in detoxification of toxic metabolites (doi:10.1107/S2053230X14007158)
	NAD(P)/H Homeostasis
1	RVBD_0155	Rv0155	-4.08479	4.01327	pntAa	Probable NAD(P) transhydrogenase (subunit alpha) PntAa [first part	intermediary metabolism and respiration
2	RVBD_0156	Rv0156	-2.82762	2.75143	pntAb	Probable NAD(P) transhydrogenase (subunit alpha) PntAb [second part	intermediary metabolism and respiration
3	RVBD_0157	Rv0157	-2.33344	2.26004	pntB	Probable NAD(P) transhydrogenase (subunit beta) PntB [integral membrane protein] (pyridine nucleotide transhydrogenase subunit beta) (nicotinamide nucleotide transhydrogenase subunit beta)	intermediary metabolism and respiration
4	RVBD_1330c	Rv1330c	-3.183	3.10955	pncB1	Nicotinic acid phosphoribosyltransferase PncB1	intermediary metabolism and respiration
5	RVBD_1901	Rv1901	-2.24491	2.16875	cinA	Probable CinA-like protein CinA	virulence, detoxification, adaptation			nicotinamide mononucleotide deamidase and ADP-ribose pyrophosphatase activities;function as an enzyme participating in the pyridine nucleotide cycle, which recycles products formed by non-redox uses of NAD.(https://doi.org/10.1038/s41467-022-29832-1)
6	RVBD_2713	Rv2713	-1.56181	1.48766	sthA	Probable soluble pyridine nucleotide transhydrogenase SthA (STH) (NAD(P)(+) transhydrogenase [B-specific]) (nicotinamide nucleotide transhydrogenase)	intermediary metabolism and respiration
	mce or mce-associated genes
1	RVBD_0167	Rv0167	-1.90146	1.82896	yrbE1A	Conserved integral membrane protein YrbE1A	virulence, detoxification, adaptation
2	RVBD_0168	Rv0168	-1.7473	1.67325	yrbE1B	Conserved integral membrane protein YrbE1B	virulence, detoxification, adaptation
3	RVBD_0169	Rv0169	-1.20828	1.13461	mce1A	Mce-family protein Mce1A	virulence, detoxification, adaptation
4	RVBD_0171	Rv0171	-1.86961	1.79947	mce1C	Mce-family protein Mce1C	virulence, detoxification, adaptation
5	RVBD_0172	Rv0172	-1.96876	1.89771	mce1D	Mce-family protein Mce1D	virulence, detoxification, adaptation
6	RVBD_0173	Rv0173	-2.31607	2.24332	lprK	Possible Mce-family lipoprotein LprK (Mce-family lipoprotein Mce1E)	cell wall and cell processes
7	RVBD_0174	Rv0174	-2.34852	2.27456	mce1F	Mce-family protein Mce1F	virulence, detoxification, adaptation
8	RVBD_0176	Rv0176	-3.25036	3.17734	Rv0176	Probable conserved Mce associated transmembrane protein	cell wall and cell processes
9	RVBD_0178	Rv0178	-4.14409	4.0704	Rv0178	Probable conserved Mce associated membrane protein	cell wall and cell processes
10	RVBD_1971	Rv1971	-1.27738	1.20566	mce3F	Mce-family protein Mce3F	virulence, detoxification, adaptation
	Regulatory proteins
1	RVBD_0043c	Rv0043c	-1.51079		Rv0043c	Probable transcriptional regulatory protein (probably GntR-family)	regulatory proteins
2	RVBD_0047c	Rv0047c	-3.87032	3.79195	Rv0047c	Conserved protein	conserved hypotheticals		SUBFAMILY NOT MED (PTHR33169:SF14)	napM
3	RVBD_0158	Rv0158	-1.50841	1.42994	Rv0158	Probable transcriptional regulatory protein (possibly TetR-family)	regulatory proteins
4	RVBD_0195	Rv0195	-3.07605	3.00151	Rv0195	Possible two component transcriptional regulatory protein (probably LuxR-family)	regulatory proteins			LuxR family regulator Rv0195
5	RVBD_0260c	Rv0260c	-4.25759		Rv0260c	Possible transcriptional regulatory protein	regulatory proteins			interact with DosS;https://doi.org/10.1038/s42003-019-0594-0
6	RVBD_0844c	Rv0844c	-2.29588		narL	Possible nitrate/nitrite response transcriptional regulatory protein NarL	regulatory proteins			Nitrate sensing and metabolism regulation with dosR( DOI 10.1074/jbc.M114.591800)
7	RVBD_1151c	Rv1151c	-2.52058	2.44978	Rv1151c	Transcriptional regulatory protein	regulatory proteins			bifunctional enzyme with both lysine desuccinylation and deacetylation activities in Mtb;widespread roles for lysine succinylation in regulating metabolism and diverse processes in Mtb (https://doi.org/10.1074/mcp.M114.045922); deacetylate HupB
8	RVBD_1460	Rv1460	-1.72763	1.65702	Rv1460	Probable transcriptional regulatory protein	regulatory proteins			SufR
9	RVBD_1657	Rv1657	-3.04932	2.97911	argR	Probable arginine repressor ArgR (AHRC)	regulatory proteins
10	RVBD_1743	Rv1743	-1.82059	1.75171	pknE	Probable transmembrane serine/threonine-protein kinase E PknE (protein kinase E) (STPK E)	regulatory proteins
11	RVBD_1776c	Rv1776c	-2.58734	2.51223	Rv1776c	Possible transcriptional regulatory protein	regulatory proteins
12	RVBD_1994c	Rv1994c	-3.79751	3.71535	cmtR	Metal sensor transcriptional regulator CmtR (ArsR-SmtB family)	regulatory proteins
13	RVBD_2069	Rv2069	-3.57312	3.49916	sigC	RNA polymerase sigma factor, ECF subfamily, SigC	information pathways
14	RVBD_2175c	Rv2175c	-2.94568	2.86817	Rv2175c	Conserved regulatory protein	regulatory proteins
15	RVBD_2374c	Rv2374c	-6.02182	5.94582	hrcA	Probable heat shock protein transcriptional repressor HrcA	virulence, detoxification, adaptation
16	RVBD_2710	Rv2710	-1.61662	1.54617	sigB	RNA polymerase sigma factor SigB	information pathways
17	RVBD_3066	Rv3066	-1.75144		Rv3066	Probable transcriptional regulatory protein (probably DeoR-family)	regulatory proteins			Transcriptional regulator of mmr operon (https://doi.org/10.1093/nar/gks677)
18	RVBD_3133c	Rv3133c	-2.24669	2.17187	devR	Two component transcriptional regulatory protein DevR (probably LuxR/UhpA-family)	regulatory proteins			DosR
19	RVBD_3220c	Rv3220c	-2.41961	2.34341	Rv3220c	Probable two component sensor kinase	regulatory proteins			carbon-source responsive, Cyclic di-GMP, Cu, NO sensor (https://doi.org/10.1096/fj.202002537RR)( DOI: 10.7554/eLife.65351); TCS
20	RVBD_3862c	Rv3862c	-2.77177	2.69606	whiB6	Possible transcriptional regulatory protein WhiB-like WhiB6	regulatory proteins			Regulator of Esx1 secretion and Dos regulon (doi: 10.1016/j.celrep.2016.07.080); upregulated in oxidative stress ( DOI: 10.1111/j.1365-2958.2012.08165.x, https://doi.org/10.1128/AAC.00295-06).
	cofactor homeostasis
1	RVBD_0294	Rv0294	-1.69485		tam	Probable trans-aconitate methyltransferase Tam	intermediary metabolism and respiration			biotin biogenesis(https://www.pnas.org/cgi/doi/10.1073/pnas.2010189117)
2	RVBD_0438c	Rv0438c	-1.23647	1.1666	moeA2	Probable molybdopterin biosynthesis protein MoeA2	intermediary metabolism and respiration
3	RVBD_0868c	Rv0868c	-1.93509	1.86576	moaD2	Probable molybdenum cofactor biosynthesis protein D 2 MoaD2 (molybdopterin converting factor small subunit) (molybdopterin [MPT] converting factor, subunit 1)	intermediary metabolism and respiration
4	RVBD_0992c	Rv0992c	-3.75032	3.67386	Rv0992c	Conserved hypothetical protein	conserved hypotheticals		5-FORMYLTETRAHYDROFOLATE CYCLO-LIGASE (PTHR23407:SF1)	5,10-methenyltetrahydrofolate synthase (MTHFS; also called 5-formyltetrahydrofolate cyclo-ligase; EC 6.3.3.2); folate homeostasis (DOI 10.1074/jbc.M111.231076)
5	RVBD_1940	Rv1940	-1.62256		ribA1	Probable riboflavin biosynthesis protein RibA1 (GTP cyclohydrolase II)	intermediary metabolism and respiration
6	RVBD_2218	Rv2218	-4.06893	3.98585	lipA	Probable lipoate biosynthesis protein A LipA	intermediary metabolism and respiration
7	RVBD_2225	Rv2225	-3.71508		panB	3-methyl-2-oxobutanoate hydroxymethyltransferase PanB	intermediary metabolism and respiration
8	RVBD_2848c	Rv2848c	-2.06521	1.99653	cobB	Probable cobyrinic acid A,C-diamide synthase CobB	intermediary metabolism and respiration			cobalamin biosynthesis
9	RVBD_3323c	Rv3323c	-2.23348		moaX	Probable MoaD-MoaE fusion protein MoaX	intermediary metabolism and respiration			biosynthesis of molybdenum cofactor
	Nucleotide metabolism
1	RVBD_3052c	Rv3052c	-3.44277	3.35625	nrdI	Probable NrdI protein	information pathways
2	RVBD_3053c	Rv3053c	-3.99063	3.9091	nrdH	Probable glutaredoxin electron transport component of NRDEF (glutaredoxin-like protein) NrdH	information pathways			Putative Mrx1 like protein (Ashima, PlosPath)
3	RVBD_0233	Rv0233	-2.80157	2.72815	nrdB	Ribonucleoside-diphosphate reductase (beta chain) NrdB (ribonucleotide reductase small chain)	information pathways
4	RVBD_0808	Rv0808	-3.06676		purF	Amidophosphoribosyltransferase PurF (glutamine phosphoribosylpyrophosphate amidotransferase) (ATASE) (gpatase)	intermediary metabolism and respiration			Involved in de novo purine biosynthesis
5	RVBD_2714	Rv2714	-4.70858	4.63409	Rv2714	Conserved alanine and leucine rich protein	conserved hypotheticals			a representative of a new nucleoside phosphorylaselike family of duplicated actinobacterial proteins(doi:10.1107/S1744309109035027)
	Energy homeostasis
1	RVBD_0247c	Rv0247c	-3.21119	3.12661	Rv0247c	Probable succinate dehydrogenase [iron-sulfur subunit] (succinic dehydrogenase)	intermediary metabolism and respiration
2	RVBD_0248c	Rv0248c	-3.74434	3.66823	Rv0248c	Probable succinate dehydrogenase [iron-sulfur subunit] (succinic dehydrogenase)	intermediary metabolism and respiration
3	RVBD_0249c	Rv0249c	-2.18088	2.09914	Rv0249c	Probable succinate dehydrogenase [membrane anchor subunit] (succinic dehydrogenase)	intermediary metabolism and respiration
4	RVBD_0525	Rv0525	-2.92242		Rv0525	Conserved protein	conserved hypotheticals			putative cytochrome c biogenesis protein (https://doi.org/10.1016/j.femsre.2004.06.002)
5	RVBD_0562	Rv0562	-3.68756	3.59937	grcC1	Probable polyprenyl-diphosphate synthase GrcC1 (polyprenyl pyrophosphate synthetase)	intermediary metabolism and respiration			isoprenoid biosynthesis leading to menaquinone biogenesis (doi:10.1111/j.1365-2958.2009.06625.x)
6	RVBD_1309	Rv1309		2.72728	atpG	Probable ATP synthase gamma chain AtpG	intermediary metabolism and respiration
7	RVBD_1777	Rv1777	-2.15819	2.08442	cyp144	Probable cytochrome P450 144 Cyp144	intermediary metabolism and respiration
8	RVBD_2200c	Rv2200c	-2.40761		ctaC	Probable transmembrane cytochrome C oxidase (subunit II) CtaC	intermediary metabolism and respiration
9	RVBD_2268c	Rv2268c	-4.02955	3.94815	cyp128	Probable cytochrome P450 128 Cyp128	intermediary metabolism and respiration			Cytochromes P450 are a group of heme-thiolate monooxygenases. They oxidize a variety of structurally unrelated compounds, including steroids, fatty acids, and xenobiotics; sulfomenaquinone biosynthesis (https://doi.org/10.1021/acsinfecdis.6b00106)
10	RVBD_2269c	Rv2269c	-2.98836	2.91175	Rv2269c	Hypothetical protein	conserved hypotheticals			Regulation of sulfomenaquinone biosynthesis(https://doi.org/10.1021/acsinfecdis.6b00106)
11	RVBD_3028c	Rv3028c	-4.72269	4.63019	fixB	Probable electron transfer flavoprotein (alpha-subunit) FixB (alpha-ETF) (electron transfer flavoprotein large subunit) (ETFLS)	intermediary metabolism and respiration			electron acceptor flavoprotein of dehydrogenases at complex II; intracellular redox balance (https://doi.org/10.1099/mic.0.000512)
12	RVBD_3043c	Rv3043c	-3.8685	3.77613	ctaD	Probable cytochrome C oxidase polypeptide I CtaD (cytochrome AA3 subunit 1)	intermediary metabolism and respiration
13	RVBD_3318	Rv3318	-1.57235	1.49795	sdhA	Probable succinate dehydrogenase (flavoprotein subunit) SdhA (succinic dehydrogenase) (fumarate reductase) (fumarate dehydrogenase) (fumaric hydrogenase)	intermediary metabolism and respiration
14	RVBD_3319	Rv3319	-2.63218		sdhB	Probable succinate dehydrogenase (iron-sulphur protein subunit) SdhB (succinic dehydrogenase) (fumarate reductase) (fumarate dehydrogenase) (fumaric hydrogenase)	intermediary metabolism and respiration
	Membrane and Cell Envelope integrity
1	RVBD_0180c	Rv0180c	-4.24384	4.1583	Rv0180c	Probable conserved transmembrane protein	cell wall and cell processes			cell envelope (https://doi.org/10.1371/journal.ppat.1010020)
2	RVBD_0482	Rv0482	-3.18214	3.10698	murB	Probable UDP-N-acetylenolpyruvoylglucosamine reductase MurB (UDP-N-acetylmuramate dehydrogenase)	cell wall and cell processes
3	RVBD_0637	Rv0637	-3.87351	3.7858	hadC	(3R)-hydroxyacyl-ACP dehydratase subunit HadC	intermediary metabolism and respiration			FAS II pathway
4	RVBD_1422	Rv1422	-4.55835	4.46985	Rv1422	Conserved hypothetical protein	conserved hypotheticals		GLUCONEOGENESIS FACTOR-RELATED (PTHR30135:SF3);nucleotide phosphatase(PC00173);transporter(PC00227)	nutrient utilization, cell wall synthesis(https://doi.org/10.1128/IAI.02207-14)
5	RVBD_1449c	Rv1449c	-3.93168		tkt	Transketolase Tkt (TK)	intermediary metabolism and respiration			links oxidative PPP to arabinan biosynthesis (http://dx.doi.org/10.1098/rsob.110026)
6	RVBD_1543	Rv1543	-7.59791	7.52898	Rv1543	Possible fatty acyl-CoA reductase	lipid metabolism			fatty acyl-coenzyme-A reductase genes involved in wax ester synthesis in Mtb.Our results indicate that the fcr1 and fcr2 gene products are involved in the synthesis and accumulation of WE that decrease Mtb cell wall permeability, reduce nutrient uptake and thus inhibit replication of the pathogen.(https://doi.org/10.1371/journal.pone.0051641); antibiotic susceptibility (https://doi.org/10.1128/mS…
7	RVBD_1640c	Rv1640c	-3.18825	3.1091	lysX	Lysyl-tRNA synthetase 2 LysX	information pathways			Catalyzes the production of L-lysyl-tRNA(Lys)transfer and the transfer of a lysyl group from L-lysyl-tRNA(Lys) to membrane-bound phosphatidylglycerol (PG), which produces lysylphosphatidylglycerol (LPG), one of the components of the bacterial membrane with a positive net charge. LPG synthesis contributes to the resistance to cationic antimicrobial peptides (CAMPs) and likely protects M.tuberculos…
8	RVBD_2174	Rv2174	-2.81754		mptA	Alpha(1->6)mannosyltransferase. Possible conserved integral membrane protein.	cell wall and cell processes			Lipoarabinomannan (LAM) synthesis;https://doi.org/10.1074/jbc.M703389200
9	RVBD_2181	Rv2181	-1.7408	1.66537	Rv2181	Alpha(1->2)mannosyltransferase	cell wall and cell processes			Lipoarabinomannan (LAM) synthesis (https://doi.org/10.1073/pnas.0603049103)
10	RVBD_2483c	Rv2483c	-4.961	4.88688	plsC	Possible transmembrane phospholipid biosynthesis bifunctional enzyme PlsC: putative L-3-phosphoserine phosphatase (O-phosphoserine phosphohydrolase) (PSP) (pspase) + 1-acyl-SN-glycerol-3-phosphate acyltransferase (1-AGP acyltransferase) (1-AGPAT) (lysophosphatidic acid acyltransferase) (LPAAT)	lipid metabolism
11	RVBD_2525c	Rv2525c	-1.85947	1.78806	Rv2525c	Conserved hypothetical protein. Secreted	conserved hypotheticals			May function as a peptidoglycan hydrolase with glycosidase activity (PubMed:25260828).
12	RVBD_2929	Rv2929	-4.67486	4.5972	Rv2929	Hypothetical protein	conserved hypotheticals			associated with PDIM/PGL synthesis locus (doi:10.1111/j.1472-765X.2005.01659.x,https://doi.org/10.1371/journal.ppat.1002621)
13	RVBD_2958c	Rv2958c	-1.83626	1.76082	Rv2958c	Possible glycosyl transferase	intermediary metabolism and respiration			PGL synthesis (https://doi.org/10.1074/jbc.M406246200)
14	RVBD_3272	Rv3272	-1.86186	1.79775	Rv3272	Conserved hypothetical protein	conserved hypotheticals			novel Family III CoA transferase that alters the cell wall lipid profile and protects mycobacteria from acidic and oxidative stress (https://doi.org/10.1016/j.bbapap.2018.10.011)
15	RVBD_3484	Rv3484	-5.46215	5.38787	cpsA	Possible conserved protein CpsA	conserved hypotheticals		SUBFAMILY NOT MED (PTHR33392:SF6)	cell wall assembly; decreased arabinogalactan levels in the bacterial cell wall (https://doi.org/10.1128/IAI.03081-14)
16	RVBD_3783	Rv3783	-3.27192		rfbD	Probable O-antigen/lipopolysaccharide transport integral membrane protein ABC transporter RfbD	cell wall and cell processes			Involved in the biosynthesis of the dTDP-L-rhamnose which is an important component of lipopolysaccharide (https://doi.org/10.3389/fcimb.2021.622487)
17	RVBD_3818	Rv3818	-4.71099	4.6348	Rv3818	Unknown protein	conserved hypotheticals			namH;Peptidoglycan structure (https://doi.org/10.3389/fmicb.2018.02341)
18	RVBD_3821	Rv3821	-1.29672	1.22143	Rv3821	Probable conserved integral membrane protein	cell wall and cell processes			sulfolipid exporter (https://doi.org/10.1016/j.cell.2020.02.026)
19	RVBD_3842c	Rv3842c	-1.35723	1.28394	glpQ1	Probable glycerophosphoryl diester phosphodiesterase GlpQ1 (glycerophosphodiester phosphodiesterase)	intermediary metabolism and respiration			recycling of phospholipids (PMID: 23801751), essential inside macrophages (PMID:18070897)
	cysteine biogenesis
1	RVBD_1336	Rv1336	-1.28739	1.21445	cysM	Cysteine synthase B CysM (CSASE B) (O-phosphoserine sulfhydrylase B) (O-phosphoserine (thiol)-lyase B)	intermediary metabolism and respiration			cysteine biogenesis
2	RVBD_0848	Rv0848	-1.71062	1.63786	cysK2	Possible cysteine synthase a CysK2 (O-acetylserine sulfhydrylase) (O-acetylserine (thiol)-lyase) (CSASE)	intermediary metabolism and respiration
	Transporters/ Efflux
1	RVBD_0037c	Rv0037c	-1.28129	1.21011	Rv0037c	Probable conserved integral membrane protein	cell wall and cell processes			Efflux pump	doi:10.1007/82_2012_300.NIH-PA Author ManuscriptNIH-PA Author ManuscriptNIH-PA Author Manuscript
2	RVBD_0849	Rv0849	-1.81765		Rv0849	Probable conserved integral membrane transport protein	cell wall and cell processes
3	RVBD_0917	Rv0917	-1.36921	1.29628	betP	Possible glycine betaine transport integral membrane protein BetP	cell wall and cell processes
4	RVBD_0932c	Rv0932c	-1.88234	1.80453	pstS2	Periplasmic phosphate-binding lipoprotein PstS2 (PBP-2) (PstS2)	cell wall and cell processes			Phosphate uptake; phosphate binding protein(doi:10.1128/IAI.73.3.1898–1902.2005)
5	RVBD_0934	Rv0934	-4.2964	4.22048	pstS1	Periplasmic phosphate-binding lipoprotein PstS1 (PBP-1) (PstS1)	cell wall and cell processes			Phosphate uptake; phosphate binding protein(doi:10.1128/IAI.73.3.1898–1902.2005)
6	RVBD_0987	Rv0987	-3.20787	3.13778	Rv0987	Probable adhesion component transport transmembrane protein ABC transporter	cell wall and cell processes
7	RVBD_1146	Rv1146	-1.13982		mmpL13b	Probable conserved transmembrane transport protein MmpL13b	cell wall and cell processes			nucleotide phosphatase(PC00173)
8	RVBD_1244	Rv1244	-3.81311	3.73893	lpqZ	Probable lipoprotein LpqZ	cell wall and cell processes			lipoproteins belonged to the ABC transport systems with a role in peptide transport (DOI 10.1074/ mcp.M112.018846)
9	RVBD_1250	Rv1250	-1.54805	1.4762	Rv1250	Probable drug-transport integral membrane protein	cell wall and cell processes			efflux pump
10	RVBD_1458c	Rv1458c	-4.985	4.90499	Rv1458c	Probable unidentified antibiotic-transport ATP-binding protein ABC transporter	cell wall and cell processes
11	RVBD_1668c	Rv1668c	-2.82475	2.7529	Rv1668c	Probable first part of macrolide-transport ATP-binding protein ABC transporter	cell wall and cell processes
12	RVBD_2038c	Rv2038c	-3.05716		Rv2038c	Probable sugar-transport ATP-binding protein ABC transporter	cell wall and cell processes			carbohydrate uptake transporters (https://doi.org/10.1186/s12864-021-07972-w)
13	RVBD_2443	Rv2443	-1.70989	1.63698	dctA	Probable C4-dicarboxylate-transport transmembrane protein DctA	cell wall and cell processes			DctA, a C4-dicarboxylate-transport transmembrane protein important for translocation of TCA cycle intermediates e.g. Succinate, fumarate or malate to Mtb. (https://doi.org/10.1371/journal.pone.0135208)
14	RVBD_2459	Rv2459	-1.95265	1.87948	Rv2459	Probable conserved integral membrane transport protein	cell wall and cell processes			efflux pump jeffA
15	RVBD_2586c	Rv2586c	-3.80439	3.72515	secF	Probable protein-export membrane protein SecF	cell wall and cell processes
16	RVBD_2691	Rv2691	-1.6809	1.60154	ceoB	TRK system potassium uptake protein CeoB	cell wall and cell processes			K+-uptake systems(https://doi.org/10.3389/fgene.2021.698875)
17	RVBD_3136	Rv3136	-3.74533	3.67117	PPE51	PPE family protein PPE51	PE/PPE			Disaccharide, trehalose, glucose, glycerol import (ttps://doi.org/10.1038/s41598-022-06109-7)(DOI: 10.3390/cells9030603)(https://doi.org/10.1126/science.aav5912)
18	RVBD_3240c	Rv3240c	-2.48701		secA1	Probable preprotein translocase SecA1 1 subunit	cell wall and cell processes			housekeeping SecA for protein export (DOI 10.1074/jbc.M900325200)
19	RVBD_3311	Rv3311	-1.67265	1.60026	Rv3311	Conserved protein	conserved hypotheticals			SecA2 associated SatS; a protein (sapM; virulence factor) export chaperone (https://doi.org/10.7554/eLife.40063.001)
20	RVBD_3666c	Rv3666c	-3.86882	3.78396	dppA	Probable periplasmic dipeptide-binding lipoprotein DppA	cell wall and cell processes			Fe homeostasis (https://doi.org/10.1038/s41467-019-12109-5)
21	RVBD_3728	Rv3728	-1.32627	1.25372	Rv3728	Probable conserved two-domain membrane protein	cell wall and cell processes			Efflux pump (https://doi.org/10.1089/mdr.2009.0054)
22	RVBD_3759c	Rv3759c	-2.48184		proX	Possible osmoprotectant (glycine betaine/carnitine/choline/L-proline) binding lipoprotein ProX	virulence, detoxification, adaptation			osmoprotectant Importer
	C metabolism
1	RVBD_0896	Rv0896	-3.72077		gltA2	Probable citrate synthase I GltA2	intermediary metabolism and respiration
2	RVBD_1493	Rv1493	-2.34959	2.27877	mutB	Probable methylmalonyl-CoA mutase large subunit MutB (MCM)	lipid metabolism
3	RVBD_2249c	Rv2249c	-2.71221	2.63747	glpD1	Probable glycerol-3-phosphate dehydrogenase GlpD1	intermediary metabolism and respiration
4	RVBD_2496c	Rv2496c		6.4669	bkdB	Probable branched-chain keto acid dehydrogenase E1 component, beta subunit BkdB	intermediary metabolism and respiration
5	RVBD_2899c	Rv2899c	-4.42477	4.33383	fdhD	Possible FdhD protein homolog	intermediary metabolism and respiration			Required for formate dehydrogenase (FDH) activity. Acts as a sulfur carrier protein that transfers sulfur from IscS to the molybdenum cofactor prior to its insertion into FDH (Uniprot)
6	RVBD_3302c	Rv3302c	-3.75679		glpD2	Probable glycerol-3-phosphate dehydrogenase GlpD2	intermediary metabolism and respiration			Central C metabolism and possibly cofactor metabolism (MycoBrowser)
7	RVBD_3469c	Rv3469c	-1.70899	1.63492	mhpE	Probable 4-hydroxy-2-oxovalerate aldolase MhpE (HOA)	intermediary metabolism and respiration			oxaloacetate decarboxylase activity (doi: 10.1021/bi400351h)
8	RVBD_3519	Rv3519	-2.47118	2.3948	Rv3519	Unknown protein	conserved hypotheticals			Acetoacetate decarboxylase family protein (http://networks.systemsbiology.net/mtb/genes/Rv3519)
9	RVBD_1449c	Rv1449c	-3.93168		tkt	Transketolase Tkt (TK)	intermediary metabolism and respiration			links oxidative PPP to arabinan biosynthesis (http://dx.doi.org/10.1098/rsob.110026)
	Ion homeostasis
1	RVBD_0096	Rv0096	-6.82801	6.75218	PPE1	PPE family protein PPE1	PE/PPE			putative isonitrile lipopeptide (INLP) and thus called INLP synthase (INLPS) complex(https://doi.org/10.1128/AAC.01213-19)
2	RVBD_0097	Rv0097	-3.929	3.85688	Rv0097	Possible oxidoreductase	intermediary metabolism and respiration			Zinc homeostasis,putative isonitrile lipopeptide (INLP) and thus called INLP synthase (INLPS) complex(https://doi.org/10.1073/pnas.1705016114, https://doi.org/10.1073/pnas.2110293119)
3	RVBD_1344	Rv1344	-2.52348	2.45054	mbtL	Acyl carrier protein (ACP) MbtL	lipid metabolism			Fe
4	RVBD_3666c	Rv3666c	-3.86882	3.78396	dppA	Probable periplasmic dipeptide-binding lipoprotein DppA	cell wall and cell processes			Fe homeostasis (https://doi.org/10.1038/s41467-019-12109-5)
5	RVBD_0932c	Rv0932c	-1.88234	1.80453	pstS2	Periplasmic phosphate-binding lipoprotein PstS2 (PBP-2) (PstS2)	cell wall and cell processes			Phosphate uptake; phosphate binding protein(doi:10.1128/IAI.73.3.1898–1902.2005)
6	RVBD_0934	Rv0934	-4.2964	4.22048	pstS1	Periplasmic phosphate-binding lipoprotein PstS1 (PBP-1) (PstS1)	cell wall and cell processes			Phosphate uptake; phosphate binding protein(doi:10.1128/IAI.73.3.1898–1902.2005)
7	RVBD_2691	Rv2691	-1.6809	1.60154	ceoB	TRK system potassium uptake protein CeoB	cell wall and cell processes			K+-uptake systems(https://doi.org/10.3389/fgene.2021.698875)
8	RVBD_0688	Rv0688	-2.00094	1.9288	Rv0688	Putative ferredoxin reductase	intermediary metabolism and respiration			fdrA
	Toxins and TA system
1	RVBD_1494	Rv1494	-3.65453	3.58279	mazE4	Possible antitoxin MazE4	virulence, detoxification, adaptation
2	RVBD_1955	Rv1955	-3.88436	3.802	higB	Possible toxin HigB	virulence, detoxification, adaptation
3	RVBD_1957	Rv1957	-2.23372	2.16006	Rv1957	Hypothetical protein	conserved hypotheticals			Rv1957 has recently been identified as a Sec-B like chaperone required for antitoxin stabilization (Bordes et al., 2011).Together these data demonstrate that higB expression in the absence of antitoxin and Rv1957c chaperone arrests growth and causes substantial cell death in M. tuberculosis.(doi:10.1111/mmi.12358)
4	RVBD_2274c	Rv2274c	-5.85854	5.77384	mazF8	Possible toxin MazF8	virulence, detoxification, adaptation
5	RVBD_2530A	Rv2530A	-5.96929		vapB39	Possible antitoxin VapB39	virulence, detoxification, adaptation
6	RVBD_2547	Rv2547	-2.59935	2.52359	vapB19	Possible antitoxin VapB19	virulence, detoxification, adaptation
7	RVBD_3098B	Rv3098B	-3.77774	3.70192						Antitioxin (UniProtKB - V5QPS4 (3098B_MYCTU))
	Secretion system
1	RVBD_3447c	Rv3447c	-9.22396	9.15297	eccC4	ESX conserved component EccC4. ESX-4 type VII secretion system protein. Probable membrane protein.	cell wall and cell processes			The tuberculosis necrotizing toxin (TNT) CpnT exporter; https://doi.org/10.1038/s41467-021-26925-1
2	RVBD_3450c	Rv3450c	-2.68083	2.60955	eccB4	ESX conserved component EccB4. ESX-4 type VII secretion system protein. Probable membrane protein.	cell wall and cell processes
3	RVBD_3615c	Rv3615c	-1.44016		espC	ESX-1 secretion-associated protein EspC	cell wall and cell processes
4	RVBD_3866	Rv3866	-1.78139	1.70261	espG1	ESX-1 secretion-associated protein EspG1	cell wall and cell processes			ESAT-6 secretion and virulence; DOI: 10.1111/j.1365-2958.2004.04261.x
5	RVBD_3868	Rv3868	-2.10752	2.03208	eccA1	ESX conserved component EccA1. ESX-1 type VII secretion system protein.	cell wall and cell processes			ESAT-6 secretion and virulence; DOI: 10.1111/j.1365-2958.2004.04261.x
6	RVBD_3869	Rv3869	-1.50052		eccB1	ESX conserved component EccB1. ESX-1 type VII secretion system protein. Possible membrane protein.	cell wall and cell processes
7	RVBD_3871	Rv3871	-1.01763		eccCb1	ESX conserved component EccCb1. ESX-1 type VII secretion system protein.	cell wall and cell processes			RD1 locus; attenuated in THP1 macrophages( doi:10.1046/j.1365-2958.2003.03844.x), and in primates (https://doi.org/10.1086/652497)
8	RVBD_3880c	Rv3880c	-2.23569	2.15706	espL	ESX-1 secretion-associated protein EspL	cell wall and cell processes
9	RVBD_3894c	Rv3894c	-1.64601	1.57507	eccC2	ESX conserved component EccC2. ESX-2 type VII secretion system protein. Possible membrane protein.	cell wall and cell processes
	Amino acid metabolism
1	RVBD_0013	Rv0013	-4.52641		trpG	Possible anthranilate synthase component II TrpG (glutamine amidotransferase)	intermediary metabolism and respiration			Tryptophan biosyntheis
2	RVBD_0524	Rv0524	-5.35823	5.21841	hemL	Probable glutamate-1-semialdehyde 2,1-aminomutase HemL (GSA) (glutamate-1-semialdehyde aminotransferase) (GSA-at)	intermediary metabolism and respiration
3	RVBD_2201	Rv2201	-2.63082		asnB	Probable asparagine synthetase AsnB	intermediary metabolism and respiration
4	RVBD_2321c	Rv2321c	-3.35526	3.27344	rocD2	Probable ornithine aminotransferase (C-terminus part) RocD2 (ornithine--oxo-acid aminotransferase)	intermediary metabolism and respiration			arginine metabolism
5	RVBD_2427c	Rv2427c	-2.37882	2.30525	proA	Probable gamma-glutamyl phosphate reductase protein ProA (GPR) (glutamate-5-semialdehyde dehydrogenase) (glutamyl-gamma-semialdehyde dehydrogenase)	intermediary metabolism and respiration
6	RVBD_3470c	Rv3470c	-3.62379	3.55143	ilvB2	Probable acetolactate synthase (large subunit) IlvB2 (AHAS) (acetohydroxy-acid synthase large subunit) (ALS)	intermediary metabolism and respiration			Involved in valine and isoleucine biosynthesis; branched chain amino acid metabolism
7	RVBD_3709c	Rv3709c		5.67963	ask	Aspartokinase Ask (aspartate kinase) [contains: aspartokinase alpha subunit (Ask-alpha)	intermediary metabolism and respiration			amino acid metabolism
8	RVBD_3772	Rv3772	-1.99635	1.92757	hisC2	Probable histidinol-phosphate aminotransferase HisC2 (imidazole acetol-phosphate transaminase) (imidazolylacetolphosphate aminotransferase)	intermediary metabolism and respiration			histidine biogenesis
	PE proteins
1	RVBD_1468c	Rv1468c	-2.47256	2.40434	PE_PGRS29	PE-PGRS family protein PE_PGRS29	PE/PPE
2	RVBD_1753c	Rv1753c	-2.05455		PPE24	PPE family protein PPE24	PE/PPE
3	RVBD_1787	Rv1787	-1.22255	1.15068	PPE25	PPE family protein PPE25	PE/PPE
4	RVBD_1790	Rv1790	-1.1317	1.05895	PPE27	PPE family protein PPE27	PE/PPE
5	RVBD_1791	Rv1791	-4.22084	4.14094	PE19	PE family protein PE19	PE/PPE
6	RVBD_1803c	Rv1803c	-3.7754	3.70613	PE_PGRS32	PE-PGRS family protein PE_PGRS32	PE/PPE
7	RVBD_2340c	Rv2340c	-3.48022	3.40925	PE_PGRS39	PE-PGRS family protein PE_PGRS39	PE/PPE
8	RVBD_3135	Rv3135	-3.41784	3.34251	PPE50	PPE family protein PPE50	PE/PPE
9	RVBD_3159c	Rv3159c	-1.20822		PPE53	PPE family protein PPE53	PE/PPE
10	RVBD_3511	Rv3511	-1.91211	1.84443	PE_PGRS55	PE-PGRS family protein PE_PGRS55	PE/PPE
11	RVBD_3512	Rv3512	-9.56163	9.49165	PE_PGRS56	PE-PGRS family protein PE_PGRS56	PE/PPE
12	RVBD_3590c	Rv3590c	-2.31096	2.24492	PE_PGRS58	PE-PGRS family protein PE_PGRS58	PE/PPE
	RNA processing
1	RVBD_1340	Rv1340	-6.54954	6.45967	rphA	Probable ribonuclease RphA (RNase PH) (tRNA nucleotidyltransferase)	information pathways			phosphorolytic ribonuclease (RNase PH)is involved in the 3′ processing of RNAs. RNase PH removes nucleotides downstream of the 3′-CCA sequence, required for aminoacylation of tRNAs, from tRNA precursors with 3′ extensions. It is also involved in other RNA maturation and quality control processes, including the maturation of rRNA (https://doi.org/10.1126/sciadv.abb6651).
2	RVBD_1694	Rv1694	-2.6688	2.59665	tlyA	2'-O-methyltransferase TlyA	virulence, detoxification, adaptation			Catalyzes the 2'-O-methylation at nucleotides C1409 in 16S rRNA and C1920 in 23S rRNA (PubMed:16857584, PubMed:20854656).Is likely involved in ribosomal biogenesis (PubMed:21443791).hemolysin
3	RVBD_2444c	Rv2444c	-6.58698		rne	Possible ribonuclease E Rne	information pathways			cellular homeostasis (https://doi.org/10.1016/j.isci.2022.104233)
4	RVBD_2733c	Rv2733c	-3.96449	3.89259	Rv2733c	Conserved hypothetical alanine, arginine-rich protein	conserved hypotheticals		TR-2-METHYLTHIO-N(6)-DIMETHYLALLYLADENOSINE SYNTHASE (PTHR43020:SF1)	Catalyzes the methylthiolation of N6-(dimethylallyl)adenosine (i6A), leading to the formation of 2-methylthio-N6-(dimethylallyl)adenosine (ms2i6A) at position 37 in tRNAs that read codons beginning with uridine (Uniprot)
5	RVBD_2752c	Rv2752c	-4.15003	4.04914	Rv2752c	Conserved hypothetical protein	conserved hypotheticals		SUBFAMILY NOT MED (PTHR43694:SF1)	bifunctional β-lactamase/ribonuclease (https://doi.org/10.1134/S0006297911030096)
6	RVBD_2822c	Rv2822c	-3.73336		Rv2822c	Hypothetical protein	conserved hypotheticals			Endonuclease that displays both RNase H activity with a hybrid RNA/DNA substrate as well as double-stranded RNase activity. As the only authenticated RNase HI in M.tuberculosis, probably plays an important role in the physiology of this organism, being likely involved in bacterial replication. Has a possible role in B12 recycling, but the primary role of the C-terminal domain of this phosphatase …
7	RVBD_3009c	Rv3009c	-2.48221	2.41068	gatB	Probable glutamyl-tRNA(GLN) amidotransferase (subunit B) GatB (Glu-ADT subunit B)	information pathways			GatB specifically recognizes the misacylated tRNA complexes and subsequently performs the amidotransferase reaction;Allows the formation of correctly charged Asn-tRNA(Asn) or Gln-tRNA(Gln) through the transamidation of misacylated Asp-tRNA(Asn) or Glu-tRNA(Gln) in organisms which lack either or both of asparaginyl-tRNA or glutaminyl-tRNA synthetases.(https://doi.org/10.3389/fmicb.2020.577756)
	Lipid metabolism
1	RVBD_0166	Rv0166	-1.45672	1.3837	fadD5	Probable fatty-acid-CoA ligase FadD5 (fatty-acid-CoA synthetase) (fatty-acid-CoA synthase)	lipid metabolism
2	RVBD_0221	Rv0221	-1.62318	1.55041	Rv0221	Possible triacylglycerol synthase (diacylglycerol acyltransferase)	lipid metabolism
3	RVBD_0244c	Rv0244c	-8.95096	8.87703	fadE5	Probable acyl-CoA dehydrogenase FadE5	lipid metabolism
4	RVBD_0270	Rv0270	-6.61444	6.54565	fadD2	Probable fatty-acid-CoA ligase FadD2 (fatty-acid-CoA synthetase) (fatty-acid-CoA synthase)	lipid metabolism
5	RVBD_0400c	Rv0400c	-3.81968		fadE7	Acyl-CoA dehydrogenase FadE7	lipid metabolism
6	RVBD_0632c	Rv0632c	-2.38077	2.30975	echA3	Probable enoyl-CoA hydratase EchA3 (enoyl hydrase) (unsaturated acyl-CoA hydratase) (crotonase)	lipid metabolism
7	RVBD_0973c	Rv0973c	-2.68536		accA2	Probable acetyl-/propionyl-coenzyme A carboxylase alpha chain (alpha subunit) AccA2: biotin carboxylase + biotin carboxyl carrier protein (BCCP)	lipid metabolism
8	RVBD_1013	Rv1013	-2.56007	2.48635	pks16	Putative polyketide synthase Pks16	lipid metabolism
9	RVBD_1142c	Rv1142c	-2.05941		echA10	Probable enoyl-CoA hydratase EchA10 (enoyl hydrase) (unsaturated acyl-CoA hydratase) (crotonase)	lipid metabolism
10	RVBD_1206	Rv1206	-6.46533	6.39619	fadD6	Probable fatty-acid-CoA ligase FadD6 (fatty-acid-CoA synthetase) (fatty-acid-CoA synthase)	lipid metabolism
11	RVBD_1467c	Rv1467c	-1.59892	1.52972	fadE15	Probable acyl-CoA dehydrogenase FadE15	lipid metabolism
12	RVBD_1544	Rv1544	-3.93171	3.85888	Rv1544	Possible ketoacyl reductase	lipid metabolism
13	RVBD_1550	Rv1550	-4.94227	4.86863	fadD11	Probable fatty-acid-CoA ligase FadD11 (fatty-acid-CoA synthetase) (fatty-acid-CoA synthase)	lipid metabolism
14	RVBD_3504	Rv3504	-1.63963	1.56836	fadE26	Probable acyl-CoA dehydrogenase FadE26	lipid metabolism			cholesterol degradation (https://doi.org/10.1128/JB.00502-13)
15	RVBD_3523	Rv3523	-1.57614		ltp3	Probable lipid carrier protein or keto acyl-CoA thiolase Ltp3	lipid metabolism
16	RVBD_3556c	Rv3556c	-2.88977	2.82003	fadA6	Probable acetyl-CoA acetyltransferase FadA6 (acetoacetyl-CoA thiolase)	lipid metabolism			cholesterol degradation (https://doi.org/10.1093/femspd/fty021)
	N2 metabolism
1	RVBD_2918c	Rv2918c	-4.2253	4.15064	glnD	Probable [protein-PII] uridylyltransferase GlnD (PII uridylyl- transferase) (uridylyl removing enzyme) (UTASE)	intermediary metabolism and respiration			intracellular N2 sensor, ammonia assimilation; N2 metabolism (doi:10.1016/j.tube.2006.12.003,https://doi.org/10.1111/j.1574-6976.2010.00216.x)
	Cell division
1	RVBD_2345	Rv2345	-5.96276	5.89148	Rv2345	Possible conserved transmembrane protein	cell wall and cell processes			phosphatase involved in Cell division (https://doi.org/10.1016/j.pep.2015.03.003)
2	RVBD_2553c	Rv2553c	-4.11033		Rv2553c	Probable conserved membrane protein	cell wall and cell processes			Cell division; putative transglycosylase (https://doi.org/10.3389/fmicb.2021.626461)
	Transferases
1	RVBD_3263	Rv3263	-1.30184		Rv3263	Probable DNA methylase (modification methylase) (methyltransferase)	information pathways			mamA; required under hypoxia (https://doi.org/10.1371/journal.ppat.1003419)
2	RVBD_0089	Rv0089	-2.65875	2.58624	Rv0089	Possible methyltransferase/methylase	intermediary metabolism and respiration
3	RVBD_0567	Rv0567	-1.69691	1.62409	Rv0567	Probable methyltransferase/methylase	intermediary metabolism and respiration
4	RVBD_0802c	Rv0802c	-3.69138	3.61964	Rv0802c	Possible succinyltransferase in the GCN5-related N-acetyltransferase family	intermediary metabolism and respiration			Rv0802c can bring about succinylation as well as acetylation of MtHU and their modifications modulate the DNA-binding properties of MtHU(https://doi.org/10.1099/mic.0.001058)
5	RVBD_3034c	Rv3034c	-1.94879	1.87614	Rv3034c	Possible transferase	intermediary metabolism and respiration			Acetyltransferase;Regulates host peroxisome homeostasis in response to intracellular redox levels to favor mycobacterial infection in macrophage (PubMed:32388919).
6	RVBD_3814c	Rv3814c	-2.9182	2.84199	Rv3814c	Possible acyltransferase	intermediary metabolism and respiration			1-acylglycerol-3-phosphate O-acyltransferase activity (Uniprot)
7	RVBD_3817	Rv3817	-3.08429	3.00814	Rv3817	Possible phosphotransferase	intermediary metabolism and respiration
8	RVBD_2416c	Rv2416c	-2.69956	2.62363	eis	Enhanced intracellular survival protein Eis, GCN5-related N-acetyltransferase	virulence, detoxification, adaptation			acetylation status of HupB to remodel the mycobacterial chromosome(https://doi.org/10.1021/acs.biochem.7b01089)
9	RVBD_2739c	Rv2739c	-6.11693	6.04158	Rv2739c	Possible alanine rich transferase	intermediary metabolism and respiration
	Other proteins in Mtb redoxosome
1	RVBD_0090	Rv0090	-5.10335	5.02595	Rv0090	Possible membrane protein	cell wall and cell processes
2	RVBD_0128	Rv0128	-1.81705	1.74503	Rv0128	Probable conserved transmembrane protein	cell wall and cell processes
3	RVBD_0418	Rv0418	-3.22814	3.15061	lpqL	Probable lipoprotein aminopeptidase LpqL	cell wall and cell processes
4	RVBD_0420c	Rv0420c	-4.26408	4.18659	Rv0420c	Possible transmembrane protein	cell wall and cell processes
5	RVBD_0477	Rv0477	-2.55266	2.47568	Rv0477	Possible conserved secreted protein	cell wall and cell processes
6	RVBD_0544c	Rv0544c	-4.22775	4.15708	Rv0544c	Possible conserved transmembrane protein	cell wall and cell processes
7	RVBD_0875c	Rv0875c	-3.79902	3.7133	Rv0875c	Possible conserved exported protein	cell wall and cell processes			D binding protein(PC00009);isomerase(PC00135)
8	RVBD_0988	Rv0988	-4.25476	4.1814	Rv0988	Possible conserved exported protein	cell wall and cell processes
9	RVBD_1087A	Rv1087A	-1.91921	1.8443	Rv1087A	Conserved hypothetical protein	cell wall and cell processes
10	RVBD_1249c	Rv1249c	-2.00679	1.93719	Rv1249c	Possible membrane protein	cell wall and cell processes
11	RVBD_1291c	Rv1291c	-3.58792	3.50192	Rv1291c	Conserved hypothetical secreted protein	cell wall and cell processes
12	RVBD_1342c	Rv1342c	-5.03782	4.95312	Rv1342c	Conserved membrane protein	cell wall and cell processes
13	RVBD_1362c	Rv1362c	-2.37841	2.29885	Rv1362c	Possible membrane protein	cell wall and cell processes
14	RVBD_1758	Rv1758	-1.6665		cut1	Probable cutinase Cut1	cell wall and cell processes
15	RVBD_1761c	Rv1761c	-1.52938	1.45686	Rv1761c	Possible exported protein	cell wall and cell processes			https://doi.org/10.1002/pro.24
16	RVBD_1881c	Rv1881c	-1.23527	1.15859	lppE	Possible conserved lipoprotein LppE	cell wall and cell processes			hydrolase(PC00121)
17	RVBD_1892	Rv1892	-2.80852	2.7316	Rv1892	Probable membrane protein	cell wall and cell processes
18	RVBD_1999c	Rv1999c	-3.25551	3.17654	Rv1999c	Probable conserved integral membrane protein	cell wall and cell processes
19	RVBD_2273	Rv2273	-4.31487	4.24319	Rv2273	Probable conserved transmembrane protein	cell wall and cell processes
20	RVBD_2437	Rv2437	-5.05621	4.96471	Rv2437	Conserved transmembrane protein	cell wall and cell processes
21	RVBD_2637	Rv2637	-2.62621	2.554	dedA	Possible transmembrane protein DedA	cell wall and cell processes
22	RVBD_2668	Rv2668	-3.20989	3.13786	Rv2668	Possible exported alanine and valine rich protein	cell wall and cell processes
23	RVBD_2721c	Rv2721c	-1.30685	1.2341	Rv2721c	Possible conserved transmembrane alanine and glycine rich protein	cell wall and cell processes
24	RVBD_2723	Rv2723	-6.5903	6.51623	Rv2723	Probable conserved integral membrane protein	cell wall and cell processes
25	RVBD_2806	Rv2806	-3.44543		Rv2806	Possible membrane protein	cell wall and cell processes
26	RVBD_3104c	Rv3104c	-2.60203	2.52609	Rv3104c	Possible conserved transmembrane protein	cell wall and cell processes
27	RVBD_3194c	Rv3194c	-1.76805		Rv3194c	Possible conserved secreted protein	cell wall and cell processes			serine protease, adhesin (DOI: 10.1016/j.micpath.2020.104498)(https://doi.org/10.1016/j.tube.2019.101880)
28	RVBD_3217c	Rv3217c	-3.68095	3.60723	Rv3217c	Probable conserved integral membrane protein	cell wall and cell processes
29	RVBD_3335c	Rv3335c	-4.38651	4.31129	Rv3335c	Probable conserved integral membrane protein	cell wall and cell processes
30	RVBD_3481c	Rv3481c	-2.3883		Rv3481c	Probable integral membrane protein	cell wall and cell processes
31	RVBD_3576	Rv3576	-2.35212	2.27647	lppH	Possible conserved lipoprotein LppH	cell wall and cell processes
32	RVBD_3584	Rv3584	-1.81829		lpqE	Possible conserved lipoprotein LpqE	cell wall and cell processes
33	RVBD_3689	Rv3689	-1.09188		Rv3689	Probable conserved transmembrane protein	cell wall and cell processes			Mycobacterium tuberculosis cAMP receptor protein (CRPMt);doi: 10.1093/nar/gku548
34	RVBD_3694c	Rv3694c	-2.55894	2.48764	Rv3694c	Possible conserved transmembrane protein	cell wall and cell processes
35	RVBD_3843c	Rv3843c	-2.70861		Rv3843c	Probable conserved transmembrane protein	cell wall and cell processes
36	RVBD_3851	Rv3851	-3.36082		Rv3851	Possible membrane protein	cell wall and cell processes
37	RVBD_0029	Rv0029	-1.82594	1.75054	Rv0029	Conserved hypothetical protein	conserved hypotheticals
38	RVBD_0122	Rv0122	-3.7354	3.65459	Rv0122	Hypothetical protein	conserved hypotheticals
39	RVBD_0210	Rv0210	-2.23279	2.16229	Rv0210	Hypothetical protein	conserved hypotheticals
40	RVBD_0311	Rv0311	-3.08831	3.01467	Rv0311	Unknown protein	conserved hypotheticals
41	RVBD_0376c	Rv0376c	-1.44366		Rv0376c	Conserved hypothetical protein	conserved hypotheticals		SUBFAMILY NOT MED (PTHR30388:SF4)
42	RVBD_0443	Rv0443	-1.52522	1.4507	Rv0443	Conserved protein	conserved hypotheticals
43	RVBD_0481c	Rv0481c	-2.56962	2.49617	Rv0481c	Hypothetical protein	conserved hypotheticals
44	RVBD_0487	Rv0487	-1.95041	1.87874	Rv0487	Conserved hypothetical protein	conserved hypotheticals
45	RVBD_0498	Rv0498	-1.82174	1.75571	Rv0498	Conserved hypothetical protein	conserved hypotheticals		SUBFAMILY NOT MED (PTHR12110:SF21)
46	RVBD_0614	Rv0614	-1.88066	1.81162	Rv0614	Conserved hypothetical protein	conserved hypotheticals
47	RVBD_0801	Rv0801	-3.02786	2.951	Rv0801	Conserved protein	conserved hypotheticals		SUBFAMILY NOT MED (PTHR35908:SF1)
48	RVBD_0810c	Rv0810c	-5.53785	5.42046	Rv0810c	Conserved hypothetical protein	conserved hypotheticals
49	RVBD_0826	Rv0826	-1.94697	1.87546	Rv0826	Conserved hypothetical protein	conserved hypotheticals		SUBFAMILY NOT MED (PTHR36151:SF3)
50	RVBD_0854	Rv0854	-2.07412	2.00197	Rv0854	Conserved protein	conserved hypotheticals		SUBFAMILY NOT MED (PTHR39683:SF4)
51	RVBD_0877	Rv0877	-3.25776	3.18597	Rv0877	Conserved hypothetical protein	conserved hypotheticals
52	RVBD_0942	Rv0942	-3.05129	2.97505	Rv0942	Hypothetical protein	conserved hypotheticals
53	RVBD_0963c	Rv0963c	-4.47574	4.40184	Rv0963c	Conserved hypothetical protein	conserved hypotheticals
54	RVBD_0997	Rv0997	-2.98465	2.91272	Rv0997	Hypothetical protein	conserved hypotheticals
55	RVBD_1012	Rv1012	-6.44559	6.37187	Rv1012	Hypothetical protein	conserved hypotheticals
56	RVBD_1043c	Rv1043c	-2.47671	2.40238	Rv1043c	Conserved hypothetical protein	conserved hypotheticals			HtrA-like serine protease Rv1043c(https://doi.org/10.4161/viru.22329)
57	RVBD_1111c	Rv1111c	-1.36124	1.28983	Rv1111c	Conserved hypothetical protein	conserved hypotheticals
58	RVBD_1134	Rv1134	-5.21598	5.12834	Rv1134	Hypothetical protein	conserved hypotheticals
59	RVBD_1154c	Rv1154c	-4.62637	4.55436	Rv1154c	Hypothetical protein	conserved hypotheticals		SUBFAMILY NOT MED (PTHR36439:SF1)
60	RVBD_1176c	Rv1176c	-2.0628	1.98786	Rv1176c	Conserved hypothetical protein	conserved hypotheticals		SUBFAMILY NOT MED (PTHR43252:SF4)	attenuated in primates (https://doi.org/10.1086/652497)
61	RVBD_1268c	Rv1268c	-1.63019	1.55805	Rv1268c	Hypothetical protein	conserved hypotheticals			metalloprotease(PC00153)
62	RVBD_1290A	Rv1290A	-4.91465		Rv1290A	Hypothetical protein	conserved hypotheticals
63	RVBD_1341	Rv1341	-5.98393	5.90604	Rv1341	Conserved protein	conserved hypotheticals		INOSINE TRIPHOSPHATE PYROPHOSPHATASE (PTHR11067:SF9)
64	RVBD_1414	Rv1414	-2.56725		Rv1414	Conserved hypothetical protein	conserved hypotheticals		SUBFAMILY NOT MED (PTHR28004:SF7)
65	RVBD_1515c	Rv1515c	-3.53212	3.45052	Rv1515c	Conserved hypothetical protein	conserved hypotheticals			RD6 gene; stress response (https://doi.org/10.1016/j.micpath.2021.104778)
66	RVBD_1519	Rv1519	-3.86592	3.78406	Rv1519	Conserved hypothetical protein	conserved hypotheticals		SUBFAMILY NOT MED (PTHR30244:SF9)	aspartic protease(PC00053); directly regulated by IdeR (https://doi.org/10.1128/IAI.73.9.5988-5994.2005); upregulated on DosR induction(https://doi.org/10.1371/journal.pone.0035935)
67	RVBD_1632c	Rv1632c	-1.97825	1.90789	Rv1632c	Hypothetical protein	conserved hypotheticals
68	RVBD_1638A	Rv1638A	-3.14326		Rv1638A	Conserved hypothetical protein	conserved hypotheticals
69	RVBD_1716	Rv1716	-2.04232		Rv1716	Conserved hypothetical protein	conserved hypotheticals		SUBFAMILY NOT MED (PTHR43564:SF2)
70	RVBD_1738	Rv1738	-4.0346	3.9605	Rv1738	Conserved protein	conserved hypotheticals			the structure of Rv1738 revealed a surprising similarity to a family of stress proteins known as hibernation-promoting factors (HPFs). This suggests that the functional role of the up-regulated Rv1738 protein in nonreplicating persistence of Mtb is to contribute to the shutdown of ribosomal protein synthesis.(https://doi.org/10.1073/pnas.1422387112)
71	RVBD_1765c	Rv1765c	-2.2233	2.15349	Rv1765c	Conserved hypothetical protein	conserved hypotheticals
72	RVBD_1769	Rv1769	-2.01777	1.94648	Rv1769	Conserved protein	conserved hypotheticals		SUBFAMILY NOT MED (PTHR28004:SF7)
73	RVBD_1770	Rv1770	-2.11075	2.03815	Rv1770	Conserved protein	conserved hypotheticals		ALKALINE PHOSPHATASE ISOZYME CONVERSION PROTEIN (PTHR12147:SF41)
74	RVBD_1775	Rv1775	-1.92355		Rv1775	Conserved hypothetical protein	conserved hypotheticals
75	RVBD_1778c	Rv1778c	-2.57991		Rv1778c	Unknown protein	conserved hypotheticals
76	RVBD_1813c	Rv1813c	-2.31585	2.23971	Rv1813c	Conserved hypothetical protein	conserved hypotheticals
77	RVBD_1831	Rv1831	-2.33798	2.26419	Rv1831	Hypothetical protein	conserved hypotheticals
78	RVBD_1864c	Rv1864c	-1.86687	1.79409	Rv1864c	Conserved protein	conserved hypotheticals		PROTEIN YIIM (PTHR30212:SF2)	attenuated in primates (https://doi.org/10.1086/652497)
79	RVBD_1871c	Rv1871c	-1.96289	1.88626	Rv1871c	Conserved protein	conserved hypotheticals
80	RVBD_1889c	Rv1889c	-4.36162	4.2785	Rv1889c	Conserved hypothetical protein	conserved hypotheticals		SUBFAMILY NOT MED (PTHR43619:SF3)
81	RVBD_1924c	Rv1924c	-1.6621	1.58785	Rv1924c	Unknown protein	conserved hypotheticals
82	RVBD_1954c	Rv1954c	-2.61158		Rv1954c	Hypothetical protein	conserved hypotheticals
83	RVBD_1975	Rv1975	-1.59733	1.52644	Rv1975	Conserved hypothetical protein	conserved hypotheticals		SUBFAMILY NOT MED (PTHR31157:SF24)
84	RVBD_2184c	Rv2184c	-2.47454	2.40215	Rv2184c	Conserved hypothetical protein	conserved hypotheticals		ANION-TRANSPORTING ATPASE-RELATED (PTHR10803:SF0)
85	RVBD_2293c	Rv2293c	-3.15694	3.07325	Rv2293c	Conserved hypothetical protein	conserved hypotheticals
86	RVBD_2406c	Rv2406c	-2.84947	2.77527	Rv2406c	Conserved protein	conserved hypotheticals		SUBFAMILY NOT MED (PTHR43080:SF2)
87	RVBD_2410c	Rv2410c	-2.01814	1.94331	Rv2410c	Conserved protein	conserved hypotheticals		SUBFAMILY NOT MED (PTHR34595:SF2)
88	RVBD_2423	Rv2423	-1.61522	1.54238	Rv2423	Hypothetical protein	conserved hypotheticals
89	RVBD_2432c	Rv2432c	-4.54294	4.44527	Rv2432c	Hypothetical protein	conserved hypotheticals
90	RVBD_2510c	Rv2510c	-2.05037		Rv2510c	Conserved protein	conserved hypotheticals		SUBFAMILY NOT MED (PTHR30121:SF6)
91	RVBD_2551c	Rv2551c	-3.38716	3.3165	Rv2551c	Conserved hypothetical protein	conserved hypotheticals		LEADER PEPTIDASE PPPA-RELATED (PTHR30487:SF0)
92	RVBD_2561	Rv2561	-2.06247		Rv2561	Conserved hypothetical protein	conserved hypotheticals
93	RVBD_2705c	Rv2705c	-2.10453	2.03072	Rv2705c	Conserved hypothetical protein	conserved hypotheticals		SUBFAMILY NOT MED (PTHR34129:SF1)
94	RVBD_2706c	Rv2706c	-3.74299	3.66251	Rv2706c	Hypothetical protein	conserved hypotheticals
95	RVBD_2722	Rv2722	-3.06006	2.98025	Rv2722	Conserved hypothetical protein	conserved hypotheticals
96	RVBD_2738c	Rv2738c	-8.37762	8.29776	Rv2738c	Conserved hypothetical protein	conserved hypotheticals
97	RVBD_2778c	Rv2778c	-1.95791	1.88365	Rv2778c	Conserved protein	conserved hypotheticals
98	RVBD_2797c	Rv2797c	-1.96264	1.89176	Rv2797c	Conserved hypothetical protein	conserved hypotheticals
99	RVBD_2807	Rv2807	-2.31262	2.23991	Rv2807	Conserved hypothetical protein	conserved hypotheticals
100	RVBD_2826c	Rv2826c	-5.03813	4.96006	Rv2826c	Hypothetical protein	conserved hypotheticals			MenT4, nucleotidyltransferase toxin;inhibits growth of Mycobacterium tuberculosis through inactivation of tRNA acceptor stems(https://doi.org/10.1126/sciadv.abb6651)
101	RVBD_2840c	Rv2840c	-2.26017	2.18874	Rv2840c	Conserved hypothetical protein	conserved hypotheticals		SUBFAMILY NOT MED (PTHR34215:SF1)
102	RVBD_2917	Rv2917	-1.12816		Rv2917	Conserved hypothetical alanine and arginine rich protein	conserved hypotheticals
103	RVBD_3033	Rv3033	-3.35085	3.27124	Rv3033	Unknown protein	conserved hypotheticals			Anti-apoptotic protein (https://doi.org/10.3389/fimmu.2018.02136)
104	RVBD_3098c	Rv3098c	-3.02331	2.94758	Rv3098c	Hypothetical protein	conserved hypotheticals
105	RVBD_3169	Rv3169	-2.19662		Rv3169	Conserved protein	conserved hypotheticals
106	RVBD_3179	Rv3179	-1.85312	1.77893	Rv3179	Conserved protein	conserved hypotheticals		SUBFAMILY NOT MED (PTHR43566:SF2)
107	RVBD_3226c	Rv3226c	-3.97724	3.89972	Rv3226c	Conserved hypothetical protein	conserved hypotheticals		EMBRYONIC STEM CELL-SPECIFIC 5-HYDROXYMETHYLCYTOSINE-BINDING PROTEIN (PTHR13604:SF0)
108	RVBD_3354	Rv3354	-1.1617		Rv3354	Conserved hypothetical protein	conserved hypotheticals
109	RVBD_3360	Rv3360	-3.9211	3.83074	Rv3360	Conserved hypothetical protein	conserved hypotheticals
110	RVBD_3471c	Rv3471c	-1.83817		Rv3471c	Conserved hypothetical protein	conserved hypotheticals		SUBFAMILY NOT MED (PTHR36114:SF8)
111	RVBD_3577	Rv3577	-1.77971		Rv3577	Conserved hypothetical protein	conserved hypotheticals
112	RVBD_3613c	Rv3613c	-6.4509		Rv3613c	Hypothetical protein	conserved hypotheticals			Virulence (doi:10.1371/journal.pone.0011066)
113	RVBD_3733c	Rv3733c	-3.39983	3.32574	Rv3733c	Conserved hypothetical protein	conserved hypotheticals		BIS(5'-NUCLEOSYL)-TETRAPHOSPHATASE [ASYMMETRICAL] (PTHR21340:SF0)	Nudix hydrolases (http://dx.doi.org/10.1128/JB.02102-12)
114	RVBD_3735	Rv3735	-1.43946	1.36563	Rv3735	Conserved hypothetical protein	conserved hypotheticals		SUBFAMILY NOT MED (PTHR36155:SF1)
115	RVBD_3745c	Rv3745c	-3.43343	3.35512	Rv3745c	Conserved hypothetical protein	conserved hypotheticals		SUBFAMILY NOT MED (PTHR37466:SF1)
116	RVBD_3850	Rv3850	-2.87787	2.79892	Rv3850	Conserved protein	conserved hypotheticals
117	RVBD_0041	Rv0041	-2.81933	2.74276	leuS	Probable leucyl-tRNA synthetase LeuS (leucine--tRNA ligase) (LEURS)	information pathways
118	RVBD_0071	Rv0071	-2.11546	2.03907	Rv0071	Possible maturase	information pathways
119	RVBD_0684	Rv0684	-5.8536		fusA1	Probable elongation factor G FusA1 (EF-G)	information pathways			Translation
120	RVBD_3052c	Rv3052c	-3.44277	3.35625	nrdI	Probable NrdI protein	information pathways
121	RVBD_0094c	Rv0094c	-1.58989	1.51971	Rv0094c	Conserved hypothetical protein	insertion seqs and phages
122	RVBD_0393	Rv0393	-1.62283		Rv0393	Conserved 13E12 repeat family protein	insertion seqs and phages
123	RVBD_1588c	Rv1588c	-1.82946	1.7594	Rv1588c	Partial REP13E12 repeat protein	insertion seqs and phages
124	RVBD_2087	Rv2087	-2.55741	2.47988	Rv2087	Conserved hypothetical protein	insertion seqs and phages
125	RVBD_2656c	Rv2656c	-2.36109		Rv2656c	Possible PhiRv2 prophage protein	insertion seqs and phages
126	RVBD_2657c	Rv2657c	-3.41495	3.34197	Rv2657c	Probable PhiRv2 prophage protein	insertion seqs and phages
127	RVBD_2666	Rv2666	-1.81837		Rv2666	Probable transposase for insertion sequence element IS1081 (fragment)	insertion seqs and phages
128	RVBD_3428c	Rv3428c	-2.37831	2.30479	Rv3428c	Possible transposase	insertion seqs and phages
129	RVBD_3466	Rv3466	-2.13549	2.06467	Rv3466	Conserved hypothetical protein	insertion seqs and phages			upregulated in dormany (https://doi.org/10.1016/j.meegid.2012.03.023)
130	RVBD_3467	Rv3467	-1.49754	1.42765	Rv3467	Conserved hypothetical protein	insertion seqs and phages
131	RVBD_3638	Rv3638	-2.74002	2.66702	Rv3638	Possible transposase	insertion seqs and phages
132	RVBD_3751	Rv3751	-2.96399		Rv3751	Probable integrase (fragment)	insertion seqs and phages
133	RVBD_3798	Rv3798	-1.63067	1.55937	Rv3798	Probable transposase	insertion seqs and phages
134	RVBD_3827c	Rv3827c	-2.06353		Rv3827c	Possible transposase	insertion seqs and phages
135	RVBD_3844	Rv3844	-3.68895	3.61234	Rv3844	Possible transposase	insertion seqs and phages
136	RVBD_0161	Rv0161	-1.92057	1.84926	Rv0161	Possible oxidoreductase	intermediary metabolism and respiration
137	RVBD_0319	Rv0319	-4.30271	4.22479	pcp	Probable pyrrolidone-carboxylate peptidase Pcp (5-oxoprolyl-peptidase) (pyroglutamyl-peptidase I) (PGP-I) (pyrase)	intermediary metabolism and respiration
138	RVBD_0322	Rv0322	-2.15414	2.08357	udgA	Probable UDP-glucose 6-dehydrogenase UdgA (UDP-GLC dehydrogenase) (UDP-GLCDH) (UDPGDH)	intermediary metabolism and respiration
139	RVBD_0373c	Rv0373c	-2.15622	2.08395	Rv0373c	Probable carbon monoxyde dehydrogenase (large chain)	intermediary metabolism and respiration
140	RVBD_0770	Rv0770	-3.66616	3.58566	Rv0770	Probable dehydrogenase/reductase	intermediary metabolism and respiration
141	RVBD_1089A	Rv1089A	-2.33117		celA2a	Probable cellulase CelA2a (endo-1,4-beta-glucanase) (endoglucanase) (carboxymethyl cellulase)	intermediary metabolism and respiration			Cellulose to glucose degradation; Mycobrowser
142	RVBD_1105	Rv1105	-1.79646		Rv1105	Possible para-nitrobenzyl esterase (fragment)	intermediary metabolism and respiration
143	RVBD_1774	Rv1774	-2.11196	2.03707	Rv1774	Probable oxidoreductase	intermediary metabolism and respiration
144	RVBD_1851	Rv1851	-3.3822	3.3023	ureF	Urease accessory protein UreF	intermediary metabolism and respiration
145	RVBD_1900c	Rv1900c	-2.00405	1.93301	lipJ	Probable lignin peroxidase LipJ	intermediary metabolism and respiration
146	RVBD_2129c	Rv2129c	-2.29942		Rv2129c	Probable oxidoreductase	intermediary metabolism and respiration
147	RVBD_2766c	Rv2766c	-1.91762	1.8439	Rv2766c	Probable short-chain type dehydrogenase/reductase	intermediary metabolism and respiration
148	RVBD_3303c	Rv3303c	-2.20624	2.12164	lpdA	NAD(P)H quinone reductase LpdA	intermediary metabolism and respiration
149	RVBD_3419c	Rv3419c	-4.43244	4.33967	gcp	Probable O-sialoglycoprotein endopeptidase Gcp (glycoprotease)	intermediary metabolism and respiration
150	RVBD_2997	Rv2997	-2.48704		Rv2997	Possible alanine rich dehydrogenase	intermediary metabolism and respiration			The noxR1 gene locus in M. bovis BCG bestows ability to resist RNI generated in vitro. In M. tuberculosis H37Rv, however, noxR1 is either not involved in RNI resistance and virulence or is better compensated for by other mechanisms (doi: 10.1054/tuld.2000.0251,https://doi.org/10.1084/jem.186.11.1885)
151	RVBD_2190Ac	Rv2190Ac	-2.08254	2.01426
152	RVBD_2468Ac	Rv2468Ac	-4.34758	4.26106
153	RVBD_3216	Rv3216	-1.69071	1.62054

## Sheet: Classification 
	Redox homeostasis and Repair
1	RVBD_0046c	Rv0046c	-5.85794		ino1	myo-inositol-1-phosphate synthase Ino1 (inositol 1-phosphate synthetase) (D-glucose 6-phosphate cycloaldolase) (glucose 6-phosphate cyclase) (glucocycloaldolase)	intermediary metabolism and respiration
2	RVBD_0117	Rv0117	-4.52272	4.43625	oxyS	Oxidative stress response regulatory protein OxyS	regulatory proteins
3	RVBD_0134	Rv0134	-1.71721	1.64598	ephF	Possible epoxide hydrolase EphF (epoxide hydratase) (arene-oxide hydratase)	virulence, detoxification, adaptation
4	RVBD_0181c	Rv0181c	-1.00117		Rv0181c	Conserved hypothetical protein	conserved hypotheticals			anti-sigma factor G (rsgA, rv0181c),RsgA is encoded immediately downstream of sigma factor G (sigG)(http://dx.doi.org/10.1128/JB.01537-14); detoxifying enzyme (https://doi.org/10.1016/j.tube.2013.05.005)
5	RVBD_0186Ac	Rv0186Ac	-3.29258	3.21792	mymT					copper-binding metallothionein(https://doi.org/10.1038/nchembio.109)
6	RVBD_0410c	Rv0410c	-5.04911		pknG	Serine/threonine-protein kinase PknG (protein kinase G) (STPK G)	regulatory proteins			RHOCS;amino acid metabolism sensor; regulator of c and N metabolism(https://doi.org/10.1371/journal.ppat.1006399,https://doi.org/10.1021/acs.jcim.1c01358,https://doi.org/10.1016/j.jprot.2018.09.013)
7	RVBD_0413	Rv0413	-2.6907	2.61994	mutT3	Possible mutator protein MutT3 (7,8-dihydro-8-oxoguanine-triphosphatase) (8-oxo-dGTPase) (dGTP pyrophosphohydrolase)	information pathways			RHOCS;RenU nudix hydrolase
8	RVBD_0508	Rv0508	-3.15037	3.07376	Rv0508	Conserved hypothetical protein	conserved hypotheticals			Putative Mrx1 like protein
9	RVBD_0526	Rv0526	-3.80049		Rv0526	Possible thioredoxin protein (thiol-disulfide interchange protein)	intermediary metabolism and respiration
10	RVBD_0816c	Rv0816c	-5.85171	5.73771	thiX	Probable thioredoxin ThiX	intermediary metabolism and respiration			thioredoxin superfamily protein
11	RVBD_0991c	Rv0991c	-4.85624	4.78518	Rv0991c	Conserved serine rich protein	conserved hypotheticals		SUBFAMILY NOT MED (PTHR34404:SF2)	redox-regulated chaperones; oxidized Ruc promotes the protein-folding activity of the essential M. tuberculosis Hsp70 chaperone system. (doi: 10.1128/mBio.01545-20)
12	RVBD_1170	Rv1170	-4.8722	4.76632	mshB	N-acetyl-1-D-myo-inosityl-2-amino-2-deoxy-alpha-D-glucopyranoside deacetylase MshB (GlcNAc-Ins deacetylase)	intermediary metabolism and respiration
13	RVBD_1205	Rv1205	-1.70054		Rv1205	Conserved hypothetical protein	conserved hypotheticals		LOG FAMILY PROTEIN YJL055W (PTHR31223:SF11)	mycobacterial proteasomal substrate encoded by Rv1205, which appears to code for a homolog of the plant-like enzyme LONELY GUY, is responsible for proteasome-mediated nitric oxide resistance.(doi:10.1016/j.molcel.2015.01.024.)
14	RVBD_1210	Rv1210	-2.53056	2.45822	tagA	Probable DNA-3-methyladenine glycosylase I TagA (tag I) (3-methyladenine-DNA glycosylase I, constitutive) (DNA-3-methyladenine glycosidase I)	information pathways
15	RVBD_1557	Rv1557	-3.31297	3.23931	mmpL6	Probable conserved transmembrane transport protein MmpL6	cell wall and cell processes			oxidative stress response (https://doi.org/10.1093/infdis/jiy526)
16	RVBD_2633c	Rv2633c	-1.53453	1.46519	Rv2633c	Hypothetical protein	conserved hypotheticals		SUBFAMILY NOT MED (PTHR35585:SF2)	non-heme di-iron catalase(DOI 10.1074/jbc.RA117.000421)
17	RVBD_2873	Rv2873	-2.73913	2.66303	mpt83	Cell surface lipoprotein Mpt83 (lipoprotein P23)	cell wall and cell processes			Redox stress (https://doi.org/10.1038/s41467-019-12224-3)
18	RVBD_3005c	Rv3005c	-2.35349	2.28118	Rv3005c	Conserved hypothetical protein	conserved hypotheticals		INNER MEMBRANE PROTEIN YPHA-RELATED (PTHR33452:SF1)	DoxX; membrane oxidoreductase complex (MRC) that is physically coupled to SodA (Nambi et al)
19	RVBD_3053c	Rv3053c	-3.99063	3.9091	nrdH	Probable glutaredoxin electron transport component of NRDEF (glutaredoxin-like protein) NrdH	information pathways			Putative Mrx1 like protein (Ashima, PlosPath)
20	RVBD_3056	Rv3056	-2.21201	2.13697	dinP	Possible DNA-damage-inducible protein P DinP (DNA polymerase V) (pol IV 2) (DNA nucleotidyltransferase (DNA-directed))	information pathways
21	RVBD_3177	Rv3177	-10.0162	9.88824	Rv3177	Possible peroxidase (non-haem peroxidase)	virulence, detoxification, adaptation			peroxidase
22	RVBD_3178	Rv3178	-2.12463		Rv3178	Conserved hypothetical protein	conserved hypotheticals		SUBFAMILY NOT MED (PTHR39428:SF3)	Putative F420H(2)-dependent quinone reductase Rv3178; Involved in a F420-dependent anti-oxidant mechanism that protects M.tuberculosis against oxidative stress and bactericidal agents; Uniprot (https://doi.org/10.1073/pnas.2025172118); Ddn
23	RVBD_3589	Rv3589	-2.37235	2.30042	mutY	Probable adenine glycosylase MutY	information pathways			oxidative DNA repair (https://doi.org/10.1073/pnas.2006792117)
24	RVBD_3684	Rv3684	-1.59271		Rv3684	Probable lyase	intermediary metabolism and respiration			(Cds1) as an H2S-producing enzyme in Mtb;PMID: 34439535
25	RVBD_3703c	Rv3703c	-2.4685	2.39739	Rv3703c	Conserved hypothetical protein	conserved hypotheticals		SUBFAMILY NOT MED (PTHR23150:SF26)	ergothioneine biosyntheiss egtB
26	RVBD_3731	Rv3731	-2.80737	2.73355	ligC	Possible ATP-dependent DNA ligase LigC (polydeoxyribonucleotide synthase [ATP]) (polynucleotide ligase [ATP]) (sealase) (DNA repair protein) (DNA joinase)	information pathways			DNA repair
27	RVBD_2971	Rv2971	-4.08531	3.99819	Rv2971	Probable oxidoreductase	intermediary metabolism and respiration			Aldo-keto reductases (AKR) are a large superfamily of NADPH-dependent oxidoreductases and play a role in detoxification of toxic metabolites (doi:10.1107/S2053230X14007158)
	NAD(P)/H Homeostasis
1	RVBD_0155	Rv0155	-4.08479	4.01327	pntAa	Probable NAD(P) transhydrogenase (subunit alpha) PntAa [first part	intermediary metabolism and respiration
2	RVBD_0156	Rv0156	-2.82762	2.75143	pntAb	Probable NAD(P) transhydrogenase (subunit alpha) PntAb [second part	intermediary metabolism and respiration
3	RVBD_0157	Rv0157	-2.33344	2.26004	pntB	Probable NAD(P) transhydrogenase (subunit beta) PntB [integral membrane protein] (pyridine nucleotide transhydrogenase subunit beta) (nicotinamide nucleotide transhydrogenase subunit beta)	intermediary metabolism and respiration
4	RVBD_1330c	Rv1330c	-3.183	3.10955	pncB1	Nicotinic acid phosphoribosyltransferase PncB1	intermediary metabolism and respiration
5	RVBD_1901	Rv1901	-2.24491	2.16875	cinA	Probable CinA-like protein CinA	virulence, detoxification, adaptation			nicotinamide mononucleotide deamidase and ADP-ribose pyrophosphatase activities;function as an enzyme participating in the pyridine nucleotide cycle, which recycles products formed by non-redox uses of NAD.(https://doi.org/10.1038/s41467-022-29832-1)
6	RVBD_2713	Rv2713	-1.56181	1.48766	sthA	Probable soluble pyridine nucleotide transhydrogenase SthA (STH) (NAD(P)(+) transhydrogenase [B-specific]) (nicotinamide nucleotide transhydrogenase)	intermediary metabolism and respiration
	mce or mce-associated genes
1	RVBD_0167	Rv0167	-1.90146	1.82896	yrbE1A	Conserved integral membrane protein YrbE1A	virulence, detoxification, adaptation
2	RVBD_0168	Rv0168	-1.7473	1.67325	yrbE1B	Conserved integral membrane protein YrbE1B	virulence, detoxification, adaptation
3	RVBD_0169	Rv0169	-1.20828	1.13461	mce1A	Mce-family protein Mce1A	virulence, detoxification, adaptation
4	RVBD_0171	Rv0171	-1.86961	1.79947	mce1C	Mce-family protein Mce1C	virulence, detoxification, adaptation
5	RVBD_0172	Rv0172	-1.96876	1.89771	mce1D	Mce-family protein Mce1D	virulence, detoxification, adaptation
6	RVBD_0173	Rv0173	-2.31607	2.24332	lprK	Possible Mce-family lipoprotein LprK (Mce-family lipoprotein Mce1E)	cell wall and cell processes
7	RVBD_0174	Rv0174	-2.34852	2.27456	mce1F	Mce-family protein Mce1F	virulence, detoxification, adaptation
8	RVBD_0176	Rv0176	-3.25036	3.17734	Rv0176	Probable conserved Mce associated transmembrane protein	cell wall and cell processes
9	RVBD_0178	Rv0178	-4.14409	4.0704	Rv0178	Probable conserved Mce associated membrane protein	cell wall and cell processes
10	RVBD_1971	Rv1971	-1.27738	1.20566	mce3F	Mce-family protein Mce3F	virulence, detoxification, adaptation
	Regulatory proteins
1	RVBD_0043c	Rv0043c	-1.51079		Rv0043c	Probable transcriptional regulatory protein (probably GntR-family)	regulatory proteins
2	RVBD_0047c	Rv0047c	-3.87032	3.79195	Rv0047c	Conserved protein	conserved hypotheticals		SUBFAMILY NOT MED (PTHR33169:SF14)	napM
3	RVBD_0158	Rv0158	-1.50841	1.42994	Rv0158	Probable transcriptional regulatory protein (possibly TetR-family)	regulatory proteins
4	RVBD_0195	Rv0195	-3.07605	3.00151	Rv0195	Possible two component transcriptional regulatory protein (probably LuxR-family)	regulatory proteins			LuxR family regulator Rv0195
5	RVBD_0260c	Rv0260c	-4.25759		Rv0260c	Possible transcriptional regulatory protein	regulatory proteins			interact with DosS;https://doi.org/10.1038/s42003-019-0594-0
6	RVBD_0844c	Rv0844c	-2.29588		narL	Possible nitrate/nitrite response transcriptional regulatory protein NarL	regulatory proteins			Nitrate sensing and metabolism regulation with dosR( DOI 10.1074/jbc.M114.591800)
7	RVBD_1151c	Rv1151c	-2.52058	2.44978	Rv1151c	Transcriptional regulatory protein	regulatory proteins			bifunctional enzyme with both lysine desuccinylation and deacetylation activities in Mtb;widespread roles for lysine succinylation in regulating metabolism and diverse processes in Mtb (https://doi.org/10.1074/mcp.M114.045922); deacetylate HupB
8	RVBD_1460	Rv1460	-1.72763	1.65702	Rv1460	Probable transcriptional regulatory protein	regulatory proteins			SufR
9	RVBD_1657	Rv1657	-3.04932	2.97911	argR	Probable arginine repressor ArgR (AHRC)	regulatory proteins
10	RVBD_1743	Rv1743	-1.82059	1.75171	pknE	Probable transmembrane serine/threonine-protein kinase E PknE (protein kinase E) (STPK E)	regulatory proteins
11	RVBD_1776c	Rv1776c	-2.58734	2.51223	Rv1776c	Possible transcriptional regulatory protein	regulatory proteins
12	RVBD_1994c	Rv1994c	-3.79751	3.71535	cmtR	Metal sensor transcriptional regulator CmtR (ArsR-SmtB family)	regulatory proteins
13	RVBD_2069	Rv2069	-3.57312	3.49916	sigC	RNA polymerase sigma factor, ECF subfamily, SigC	information pathways
14	RVBD_2175c	Rv2175c	-2.94568	2.86817	Rv2175c	Conserved regulatory protein	regulatory proteins
15	RVBD_2374c	Rv2374c	-6.02182	5.94582	hrcA	Probable heat shock protein transcriptional repressor HrcA	virulence, detoxification, adaptation
16	RVBD_2710	Rv2710	-1.61662	1.54617	sigB	RNA polymerase sigma factor SigB	information pathways
17	RVBD_3066	Rv3066	-1.75144		Rv3066	Probable transcriptional regulatory protein (probably DeoR-family)	regulatory proteins			Transcriptional regulator of mmr operon (https://doi.org/10.1093/nar/gks677)
18	RVBD_3133c	Rv3133c	-2.24669	2.17187	devR	Two component transcriptional regulatory protein DevR (probably LuxR/UhpA-family)	regulatory proteins			DosR
19	RVBD_3220c	Rv3220c	-2.41961	2.34341	Rv3220c	Probable two component sensor kinase	regulatory proteins			carbon-source responsive, Cyclic di-GMP, Cu, NO sensor (https://doi.org/10.1096/fj.202002537RR)( DOI: 10.7554/eLife.65351); TCS
20	RVBD_3862c	Rv3862c	-2.77177	2.69606	whiB6	Possible transcriptional regulatory protein WhiB-like WhiB6	regulatory proteins			Regulator of Esx1 secretion and Dos regulon (doi: 10.1016/j.celrep.2016.07.080); upregulated in oxidative stress ( DOI: 10.1111/j.1365-2958.2012.08165.x, https://doi.org/10.1128/AAC.00295-06).
	cofactor homeostasis
1	RVBD_0294	Rv0294	-1.69485		tam	Probable trans-aconitate methyltransferase Tam	intermediary metabolism and respiration			biotin biogenesis(https://www.pnas.org/cgi/doi/10.1073/pnas.2010189117)
2	RVBD_0438c	Rv0438c	-1.23647	1.1666	moeA2	Probable molybdopterin biosynthesis protein MoeA2	intermediary metabolism and respiration
3	RVBD_0868c	Rv0868c	-1.93509	1.86576	moaD2	Probable molybdenum cofactor biosynthesis protein D 2 MoaD2 (molybdopterin converting factor small subunit) (molybdopterin [MPT] converting factor, subunit 1)	intermediary metabolism and respiration
4	RVBD_0992c	Rv0992c	-3.75032	3.67386	Rv0992c	Conserved hypothetical protein	conserved hypotheticals		5-FORMYLTETRAHYDROFOLATE CYCLO-LIGASE (PTHR23407:SF1)	5,10-methenyltetrahydrofolate synthase (MTHFS; also called 5-formyltetrahydrofolate cyclo-ligase; EC 6.3.3.2); folate homeostasis (DOI 10.1074/jbc.M111.231076)
5	RVBD_1940	Rv1940	-1.62256		ribA1	Probable riboflavin biosynthesis protein RibA1 (GTP cyclohydrolase II)	intermediary metabolism and respiration
6	RVBD_2218	Rv2218	-4.06893	3.98585	lipA	Probable lipoate biosynthesis protein A LipA	intermediary metabolism and respiration
7	RVBD_2225	Rv2225	-3.71508		panB	3-methyl-2-oxobutanoate hydroxymethyltransferase PanB	intermediary metabolism and respiration
8	RVBD_2848c	Rv2848c	-2.06521	1.99653	cobB	Probable cobyrinic acid A,C-diamide synthase CobB	intermediary metabolism and respiration			cobalamin biosynthesis
9	RVBD_3323c	Rv3323c	-2.23348		moaX	Probable MoaD-MoaE fusion protein MoaX	intermediary metabolism and respiration			biosynthesis of molybdenum cofactor
	Nucleotide metabolism
1	RVBD_3052c	Rv3052c	-3.44277	3.35625	nrdI	Probable NrdI protein	information pathways
2	RVBD_3053c	Rv3053c	-3.99063	3.9091	nrdH	Probable glutaredoxin electron transport component of NRDEF (glutaredoxin-like protein) NrdH	information pathways			Putative Mrx1 like protein (Ashima, PlosPath)
3	RVBD_0233	Rv0233	-2.80157	2.72815	nrdB	Ribonucleoside-diphosphate reductase (beta chain) NrdB (ribonucleotide reductase small chain)	information pathways
4	RVBD_0808	Rv0808	-3.06676		purF	Amidophosphoribosyltransferase PurF (glutamine phosphoribosylpyrophosphate amidotransferase) (ATASE) (gpatase)	intermediary metabolism and respiration			Involved in de novo purine biosynthesis
5	RVBD_2714	Rv2714	-4.70858	4.63409	Rv2714	Conserved alanine and leucine rich protein	conserved hypotheticals			a representative of a new nucleoside phosphorylaselike family of duplicated actinobacterial proteins(doi:10.1107/S1744309109035027)
	Energy homeostasis
1	RVBD_0247c	Rv0247c	-3.21119	3.12661	Rv0247c	Probable succinate dehydrogenase [iron-sulfur subunit] (succinic dehydrogenase)	intermediary metabolism and respiration
2	RVBD_0248c	Rv0248c	-3.74434	3.66823	Rv0248c	Probable succinate dehydrogenase [iron-sulfur subunit] (succinic dehydrogenase)	intermediary metabolism and respiration
3	RVBD_0249c	Rv0249c	-2.18088	2.09914	Rv0249c	Probable succinate dehydrogenase [membrane anchor subunit] (succinic dehydrogenase)	intermediary metabolism and respiration
4	RVBD_0525	Rv0525	-2.92242		Rv0525	Conserved protein	conserved hypotheticals			putative cytochrome c biogenesis protein (https://doi.org/10.1016/j.femsre.2004.06.002)
5	RVBD_0562	Rv0562	-3.68756	3.59937	grcC1	Probable polyprenyl-diphosphate synthase GrcC1 (polyprenyl pyrophosphate synthetase)	intermediary metabolism and respiration			isoprenoid biosynthesis leading to menaquinone biogenesis (doi:10.1111/j.1365-2958.2009.06625.x)
6	RVBD_1309	Rv1309		2.72728	atpG	Probable ATP synthase gamma chain AtpG	intermediary metabolism and respiration
7	RVBD_1777	Rv1777	-2.15819	2.08442	cyp144	Probable cytochrome P450 144 Cyp144	intermediary metabolism and respiration
8	RVBD_2200c	Rv2200c	-2.40761		ctaC	Probable transmembrane cytochrome C oxidase (subunit II) CtaC	intermediary metabolism and respiration
9	RVBD_2268c	Rv2268c	-4.02955	3.94815	cyp128	Probable cytochrome P450 128 Cyp128	intermediary metabolism and respiration			Cytochromes P450 are a group of heme-thiolate monooxygenases. They oxidize a variety of structurally unrelated compounds, including steroids, fatty acids, and xenobiotics; sulfomenaquinone biosynthesis (https://doi.org/10.1021/acsinfecdis.6b00106)
10	RVBD_2269c	Rv2269c	-2.98836	2.91175	Rv2269c	Hypothetical protein	conserved hypotheticals			Regulation of sulfomenaquinone biosynthesis(https://doi.org/10.1021/acsinfecdis.6b00106)
11	RVBD_3028c	Rv3028c	-4.72269	4.63019	fixB	Probable electron transfer flavoprotein (alpha-subunit) FixB (alpha-ETF) (electron transfer flavoprotein large subunit) (ETFLS)	intermediary metabolism and respiration			electron acceptor flavoprotein of dehydrogenases at complex II; intracellular redox balance (https://doi.org/10.1099/mic.0.000512)
12	RVBD_3043c	Rv3043c	-3.8685	3.77613	ctaD	Probable cytochrome C oxidase polypeptide I CtaD (cytochrome AA3 subunit 1)	intermediary metabolism and respiration
13	RVBD_3318	Rv3318	-1.57235	1.49795	sdhA	Probable succinate dehydrogenase (flavoprotein subunit) SdhA (succinic dehydrogenase) (fumarate reductase) (fumarate dehydrogenase) (fumaric hydrogenase)	intermediary metabolism and respiration
14	RVBD_3319	Rv3319	-2.63218		sdhB	Probable succinate dehydrogenase (iron-sulphur protein subunit) SdhB (succinic dehydrogenase) (fumarate reductase) (fumarate dehydrogenase) (fumaric hydrogenase)	intermediary metabolism and respiration
	Membrane and Cell Envelope integrity
1	RVBD_0180c	Rv0180c	-4.24384	4.1583	Rv0180c	Probable conserved transmembrane protein	cell wall and cell processes			cell envelope (https://doi.org/10.1371/journal.ppat.1010020)
2	RVBD_0482	Rv0482	-3.18214	3.10698	murB	Probable UDP-N-acetylenolpyruvoylglucosamine reductase MurB (UDP-N-acetylmuramate dehydrogenase)	cell wall and cell processes
3	RVBD_0637	Rv0637	-3.87351	3.7858	hadC	(3R)-hydroxyacyl-ACP dehydratase subunit HadC	intermediary metabolism and respiration			FAS II pathway
4	RVBD_1422	Rv1422	-4.55835	4.46985	Rv1422	Conserved hypothetical protein	conserved hypotheticals		GLUCONEOGENESIS FACTOR-RELATED (PTHR30135:SF3);nucleotide phosphatase(PC00173);transporter(PC00227)	nutrient utilization, cell wall synthesis(https://doi.org/10.1128/IAI.02207-14)
5	RVBD_1449c	Rv1449c	-3.93168		tkt	Transketolase Tkt (TK)	intermediary metabolism and respiration			links oxidative PPP to arabinan biosynthesis (http://dx.doi.org/10.1098/rsob.110026)
6	RVBD_1543	Rv1543	-7.59791	7.52898	Rv1543	Possible fatty acyl-CoA reductase	lipid metabolism			fatty acyl-coenzyme-A reductase genes involved in wax ester synthesis in Mtb.Our results indicate that the fcr1 and fcr2 gene products are involved in the synthesis and accumulation of WE that decrease Mtb cell wall permeability, reduce nutrient uptake and thus inhibit replication of the pathogen.(https://doi.org/10.1371/journal.pone.0051641); antibiotic susceptibility (https://doi.org/10.1128/mS…
7	RVBD_1640c	Rv1640c	-3.18825	3.1091	lysX	Lysyl-tRNA synthetase 2 LysX	information pathways			Catalyzes the production of L-lysyl-tRNA(Lys)transfer and the transfer of a lysyl group from L-lysyl-tRNA(Lys) to membrane-bound phosphatidylglycerol (PG), which produces lysylphosphatidylglycerol (LPG), one of the components of the bacterial membrane with a positive net charge. LPG synthesis contributes to the resistance to cationic antimicrobial peptides (CAMPs) and likely protects M.tuberculos…
8	RVBD_2174	Rv2174	-2.81754		mptA	Alpha(1->6)mannosyltransferase. Possible conserved integral membrane protein.	cell wall and cell processes			Lipoarabinomannan (LAM) synthesis;https://doi.org/10.1074/jbc.M703389200
9	RVBD_2181	Rv2181	-1.7408	1.66537	Rv2181	Alpha(1->2)mannosyltransferase	cell wall and cell processes			Lipoarabinomannan (LAM) synthesis (https://doi.org/10.1073/pnas.0603049103)
10	RVBD_2483c	Rv2483c	-4.961	4.88688	plsC	Possible transmembrane phospholipid biosynthesis bifunctional enzyme PlsC: putative L-3-phosphoserine phosphatase (O-phosphoserine phosphohydrolase) (PSP) (pspase) + 1-acyl-SN-glycerol-3-phosphate acyltransferase (1-AGP acyltransferase) (1-AGPAT) (lysophosphatidic acid acyltransferase) (LPAAT)	lipid metabolism
11	RVBD_2525c	Rv2525c	-1.85947	1.78806	Rv2525c	Conserved hypothetical protein. Secreted	conserved hypotheticals			May function as a peptidoglycan hydrolase with glycosidase activity (PubMed:25260828).
12	RVBD_2929	Rv2929	-4.67486	4.5972	Rv2929	Hypothetical protein	conserved hypotheticals			associated with PDIM/PGL synthesis locus (doi:10.1111/j.1472-765X.2005.01659.x,https://doi.org/10.1371/journal.ppat.1002621)
13	RVBD_2958c	Rv2958c	-1.83626	1.76082	Rv2958c	Possible glycosyl transferase	intermediary metabolism and respiration			PGL synthesis (https://doi.org/10.1074/jbc.M406246200)
14	RVBD_3272	Rv3272	-1.86186	1.79775	Rv3272	Conserved hypothetical protein	conserved hypotheticals			novel Family III CoA transferase that alters the cell wall lipid profile and protects mycobacteria from acidic and oxidative stress (https://doi.org/10.1016/j.bbapap.2018.10.011)
15	RVBD_3484	Rv3484	-5.46215	5.38787	cpsA	Possible conserved protein CpsA	conserved hypotheticals		SUBFAMILY NOT MED (PTHR33392:SF6)	cell wall assembly; decreased arabinogalactan levels in the bacterial cell wall (https://doi.org/10.1128/IAI.03081-14)
16	RVBD_3783	Rv3783	-3.27192		rfbD	Probable O-antigen/lipopolysaccharide transport integral membrane protein ABC transporter RfbD	cell wall and cell processes			Involved in the biosynthesis of the dTDP-L-rhamnose which is an important component of lipopolysaccharide (https://doi.org/10.3389/fcimb.2021.622487)
17	RVBD_3818	Rv3818	-4.71099	4.6348	Rv3818	Unknown protein	conserved hypotheticals			namH;Peptidoglycan structure (https://doi.org/10.3389/fmicb.2018.02341)
18	RVBD_3821	Rv3821	-1.29672	1.22143	Rv3821	Probable conserved integral membrane protein	cell wall and cell processes			sulfolipid exporter (https://doi.org/10.1016/j.cell.2020.02.026)
19	RVBD_3842c	Rv3842c	-1.35723	1.28394	glpQ1	Probable glycerophosphoryl diester phosphodiesterase GlpQ1 (glycerophosphodiester phosphodiesterase)	intermediary metabolism and respiration			recycling of phospholipids (PMID: 23801751), essential inside macrophages (PMID:18070897)
	cysteine biogenesis
1	RVBD_1336	Rv1336	-1.28739	1.21445	cysM	Cysteine synthase B CysM (CSASE B) (O-phosphoserine sulfhydrylase B) (O-phosphoserine (thiol)-lyase B)	intermediary metabolism and respiration			cysteine biogenesis
2	RVBD_0848	Rv0848	-1.71062	1.63786	cysK2	Possible cysteine synthase a CysK2 (O-acetylserine sulfhydrylase) (O-acetylserine (thiol)-lyase) (CSASE)	intermediary metabolism and respiration
	Transporters/ Efflux
1	RVBD_0037c	Rv0037c	-1.28129	1.21011	Rv0037c	Probable conserved integral membrane protein	cell wall and cell processes			Efflux pump	doi:10.1007/82_2012_300.NIH-PA Author ManuscriptNIH-PA Author ManuscriptNIH-PA Author Manuscript
2	RVBD_0849	Rv0849	-1.81765		Rv0849	Probable conserved integral membrane transport protein	cell wall and cell processes
3	RVBD_0917	Rv0917	-1.36921	1.29628	betP	Possible glycine betaine transport integral membrane protein BetP	cell wall and cell processes
4	RVBD_0932c	Rv0932c	-1.88234	1.80453	pstS2	Periplasmic phosphate-binding lipoprotein PstS2 (PBP-2) (PstS2)	cell wall and cell processes			Phosphate uptake; phosphate binding protein(doi:10.1128/IAI.73.3.1898–1902.2005)
5	RVBD_0934	Rv0934	-4.2964	4.22048	pstS1	Periplasmic phosphate-binding lipoprotein PstS1 (PBP-1) (PstS1)	cell wall and cell processes			Phosphate uptake; phosphate binding protein(doi:10.1128/IAI.73.3.1898–1902.2005)
6	RVBD_0987	Rv0987	-3.20787	3.13778	Rv0987	Probable adhesion component transport transmembrane protein ABC transporter	cell wall and cell processes
7	RVBD_1146	Rv1146	-1.13982		mmpL13b	Probable conserved transmembrane transport protein MmpL13b	cell wall and cell processes			nucleotide phosphatase(PC00173)
8	RVBD_1244	Rv1244	-3.81311	3.73893	lpqZ	Probable lipoprotein LpqZ	cell wall and cell processes			lipoproteins belonged to the ABC transport systems with a role in peptide transport (DOI 10.1074/ mcp.M112.018846)
9	RVBD_1250	Rv1250	-1.54805	1.4762	Rv1250	Probable drug-transport integral membrane protein	cell wall and cell processes			efflux pump
10	RVBD_1458c	Rv1458c	-4.985	4.90499	Rv1458c	Probable unidentified antibiotic-transport ATP-binding protein ABC transporter	cell wall and cell processes
11	RVBD_1668c	Rv1668c	-2.82475	2.7529	Rv1668c	Probable first part of macrolide-transport ATP-binding protein ABC transporter	cell wall and cell processes
12	RVBD_2038c	Rv2038c	-3.05716		Rv2038c	Probable sugar-transport ATP-binding protein ABC transporter	cell wall and cell processes			carbohydrate uptake transporters (https://doi.org/10.1186/s12864-021-07972-w)
13	RVBD_2443	Rv2443	-1.70989	1.63698	dctA	Probable C4-dicarboxylate-transport transmembrane protein DctA	cell wall and cell processes			DctA, a C4-dicarboxylate-transport transmembrane protein important for translocation of TCA cycle intermediates e.g. Succinate, fumarate or malate to Mtb. (https://doi.org/10.1371/journal.pone.0135208)
14	RVBD_2459	Rv2459	-1.95265	1.87948	Rv2459	Probable conserved integral membrane transport protein	cell wall and cell processes			efflux pump jeffA
15	RVBD_2586c	Rv2586c	-3.80439	3.72515	secF	Probable protein-export membrane protein SecF	cell wall and cell processes
16	RVBD_2691	Rv2691	-1.6809	1.60154	ceoB	TRK system potassium uptake protein CeoB	cell wall and cell processes			K+-uptake systems(https://doi.org/10.3389/fgene.2021.698875)
17	RVBD_3136	Rv3136	-3.74533	3.67117	PPE51	PPE family protein PPE51	PE/PPE			Disaccharide, trehalose, glucose, glycerol import (ttps://doi.org/10.1038/s41598-022-06109-7)(DOI: 10.3390/cells9030603)(https://doi.org/10.1126/science.aav5912)
18	RVBD_3240c	Rv3240c	-2.48701		secA1	Probable preprotein translocase SecA1 1 subunit	cell wall and cell processes			housekeeping SecA for protein export (DOI 10.1074/jbc.M900325200)
19	RVBD_3311	Rv3311	-1.67265	1.60026	Rv3311	Conserved protein	conserved hypotheticals			SecA2 associated SatS; a protein (sapM; virulence factor) export chaperone (https://doi.org/10.7554/eLife.40063.001)
20	RVBD_3666c	Rv3666c	-3.86882	3.78396	dppA	Probable periplasmic dipeptide-binding lipoprotein DppA	cell wall and cell processes			Fe homeostasis (https://doi.org/10.1038/s41467-019-12109-5)
21	RVBD_3728	Rv3728	-1.32627	1.25372	Rv3728	Probable conserved two-domain membrane protein	cell wall and cell processes			Efflux pump (https://doi.org/10.1089/mdr.2009.0054)
22	RVBD_3759c	Rv3759c	-2.48184		proX	Possible osmoprotectant (glycine betaine/carnitine/choline/L-proline) binding lipoprotein ProX	virulence, detoxification, adaptation			osmoprotectant Importer
	C metabolism
1	RVBD_0896	Rv0896	-3.72077		gltA2	Probable citrate synthase I GltA2	intermediary metabolism and respiration
2	RVBD_1493	Rv1493	-2.34959	2.27877	mutB	Probable methylmalonyl-CoA mutase large subunit MutB (MCM)	lipid metabolism
3	RVBD_2249c	Rv2249c	-2.71221	2.63747	glpD1	Probable glycerol-3-phosphate dehydrogenase GlpD1	intermediary metabolism and respiration
4	RVBD_2496c	Rv2496c		6.4669	bkdB	Probable branched-chain keto acid dehydrogenase E1 component, beta subunit BkdB	intermediary metabolism and respiration
5	RVBD_2899c	Rv2899c	-4.42477	4.33383	fdhD	Possible FdhD protein homolog	intermediary metabolism and respiration			Required for formate dehydrogenase (FDH) activity. Acts as a sulfur carrier protein that transfers sulfur from IscS to the molybdenum cofactor prior to its insertion into FDH (Uniprot)
6	RVBD_3302c	Rv3302c	-3.75679		glpD2	Probable glycerol-3-phosphate dehydrogenase GlpD2	intermediary metabolism and respiration			Central C metabolism and possibly cofactor metabolism (MycoBrowser)
7	RVBD_3469c	Rv3469c	-1.70899	1.63492	mhpE	Probable 4-hydroxy-2-oxovalerate aldolase MhpE (HOA)	intermediary metabolism and respiration			oxaloacetate decarboxylase activity (doi: 10.1021/bi400351h)
8	RVBD_3519	Rv3519	-2.47118	2.3948	Rv3519	Unknown protein	conserved hypotheticals			Acetoacetate decarboxylase family protein (http://networks.systemsbiology.net/mtb/genes/Rv3519)
9	RVBD_1449c	Rv1449c	-3.93168		tkt	Transketolase Tkt (TK)	intermediary metabolism and respiration			links oxidative PPP to arabinan biosynthesis (http://dx.doi.org/10.1098/rsob.110026)
	Ion homeostasis
1	RVBD_0096	Rv0096	-6.82801	6.75218	PPE1	PPE family protein PPE1	PE/PPE			putative isonitrile lipopeptide (INLP) and thus called INLP synthase (INLPS) complex(https://doi.org/10.1128/AAC.01213-19)
2	RVBD_0097	Rv0097	-3.929	3.85688	Rv0097	Possible oxidoreductase	intermediary metabolism and respiration			Zinc homeostasis,putative isonitrile lipopeptide (INLP) and thus called INLP synthase (INLPS) complex(https://doi.org/10.1073/pnas.1705016114, https://doi.org/10.1073/pnas.2110293119)
3	RVBD_1344	Rv1344	-2.52348	2.45054	mbtL	Acyl carrier protein (ACP) MbtL	lipid metabolism			Fe
4	RVBD_3666c	Rv3666c	-3.86882	3.78396	dppA	Probable periplasmic dipeptide-binding lipoprotein DppA	cell wall and cell processes			Fe homeostasis (https://doi.org/10.1038/s41467-019-12109-5)
5	RVBD_0932c	Rv0932c	-1.88234	1.80453	pstS2	Periplasmic phosphate-binding lipoprotein PstS2 (PBP-2) (PstS2)	cell wall and cell processes			Phosphate uptake; phosphate binding protein(doi:10.1128/IAI.73.3.1898–1902.2005)
6	RVBD_0934	Rv0934	-4.2964	4.22048	pstS1	Periplasmic phosphate-binding lipoprotein PstS1 (PBP-1) (PstS1)	cell wall and cell processes			Phosphate uptake; phosphate binding protein(doi:10.1128/IAI.73.3.1898–1902.2005)
7	RVBD_2691	Rv2691	-1.6809	1.60154	ceoB	TRK system potassium uptake protein CeoB	cell wall and cell processes			K+-uptake systems(https://doi.org/10.3389/fgene.2021.698875)
8	RVBD_0688	Rv0688	-2.00094	1.9288	Rv0688	Putative ferredoxin reductase	intermediary metabolism and respiration			fdrA
	Toxins and TA system
1	RVBD_1494	Rv1494	-3.65453	3.58279	mazE4	Possible antitoxin MazE4	virulence, detoxification, adaptation
2	RVBD_1955	Rv1955	-3.88436	3.802	higB	Possible toxin HigB	virulence, detoxification, adaptation
3	RVBD_1957	Rv1957	-2.23372	2.16006	Rv1957	Hypothetical protein	conserved hypotheticals			Rv1957 has recently been identified as a Sec-B like chaperone required for antitoxin stabilization (Bordes et al., 2011).Together these data demonstrate that higB expression in the absence of antitoxin and Rv1957c chaperone arrests growth and causes substantial cell death in M. tuberculosis.(doi:10.1111/mmi.12358)
4	RVBD_2274c	Rv2274c	-5.85854	5.77384	mazF8	Possible toxin MazF8	virulence, detoxification, adaptation
5	RVBD_2530A	Rv2530A	-5.96929		vapB39	Possible antitoxin VapB39	virulence, detoxification, adaptation
6	RVBD_2547	Rv2547	-2.59935	2.52359	vapB19	Possible antitoxin VapB19	virulence, detoxification, adaptation
7	RVBD_3098B	Rv3098B	-3.77774	3.70192						Antitioxin (UniProtKB - V5QPS4 (3098B_MYCTU))
	Secretion system
1	RVBD_3447c	Rv3447c	-9.22396	9.15297	eccC4	ESX conserved component EccC4. ESX-4 type VII secretion system protein. Probable membrane protein.	cell wall and cell processes			The tuberculosis necrotizing toxin (TNT) CpnT exporter; https://doi.org/10.1038/s41467-021-26925-1
2	RVBD_3450c	Rv3450c	-2.68083	2.60955	eccB4	ESX conserved component EccB4. ESX-4 type VII secretion system protein. Probable membrane protein.	cell wall and cell processes
3	RVBD_3615c	Rv3615c	-1.44016		espC	ESX-1 secretion-associated protein EspC	cell wall and cell processes
4	RVBD_3866	Rv3866	-1.78139	1.70261	espG1	ESX-1 secretion-associated protein EspG1	cell wall and cell processes			ESAT-6 secretion and virulence; DOI: 10.1111/j.1365-2958.2004.04261.x
5	RVBD_3868	Rv3868	-2.10752	2.03208	eccA1	ESX conserved component EccA1. ESX-1 type VII secretion system protein.	cell wall and cell processes			ESAT-6 secretion and virulence; DOI: 10.1111/j.1365-2958.2004.04261.x
6	RVBD_3869	Rv3869	-1.50052		eccB1	ESX conserved component EccB1. ESX-1 type VII secretion system protein. Possible membrane protein.	cell wall and cell processes
7	RVBD_3871	Rv3871	-1.01763		eccCb1	ESX conserved component EccCb1. ESX-1 type VII secretion system protein.	cell wall and cell processes			RD1 locus; attenuated in THP1 macrophages( doi:10.1046/j.1365-2958.2003.03844.x), and in primates (https://doi.org/10.1086/652497)
8	RVBD_3880c	Rv3880c	-2.23569	2.15706	espL	ESX-1 secretion-associated protein EspL	cell wall and cell processes
9	RVBD_3894c	Rv3894c	-1.64601	1.57507	eccC2	ESX conserved component EccC2. ESX-2 type VII secretion system protein. Possible membrane protein.	cell wall and cell processes
	Amino acid metabolism
1	RVBD_0013	Rv0013	-4.52641		trpG	Possible anthranilate synthase component II TrpG (glutamine amidotransferase)	intermediary metabolism and respiration			Tryptophan biosyntheis
2	RVBD_0524	Rv0524	-5.35823	5.21841	hemL	Probable glutamate-1-semialdehyde 2,1-aminomutase HemL (GSA) (glutamate-1-semialdehyde aminotransferase) (GSA-at)	intermediary metabolism and respiration
3	RVBD_2201	Rv2201	-2.63082		asnB	Probable asparagine synthetase AsnB	intermediary metabolism and respiration
4	RVBD_2321c	Rv2321c	-3.35526	3.27344	rocD2	Probable ornithine aminotransferase (C-terminus part) RocD2 (ornithine--oxo-acid aminotransferase)	intermediary metabolism and respiration			arginine metabolism
5	RVBD_2427c	Rv2427c	-2.37882	2.30525	proA	Probable gamma-glutamyl phosphate reductase protein ProA (GPR) (glutamate-5-semialdehyde dehydrogenase) (glutamyl-gamma-semialdehyde dehydrogenase)	intermediary metabolism and respiration
6	RVBD_3470c	Rv3470c	-3.62379	3.55143	ilvB2	Probable acetolactate synthase (large subunit) IlvB2 (AHAS) (acetohydroxy-acid synthase large subunit) (ALS)	intermediary metabolism and respiration			Involved in valine and isoleucine biosynthesis; branched chain amino acid metabolism
7	RVBD_3709c	Rv3709c		5.67963	ask	Aspartokinase Ask (aspartate kinase) [contains: aspartokinase alpha subunit (Ask-alpha)	intermediary metabolism and respiration			amino acid metabolism
8	RVBD_3772	Rv3772	-1.99635	1.92757	hisC2	Probable histidinol-phosphate aminotransferase HisC2 (imidazole acetol-phosphate transaminase) (imidazolylacetolphosphate aminotransferase)	intermediary metabolism and respiration			histidine biogenesis
	PE proteins
1	RVBD_1468c	Rv1468c	-2.47256	2.40434	PE_PGRS29	PE-PGRS family protein PE_PGRS29	PE/PPE
2	RVBD_1753c	Rv1753c	-2.05455		PPE24	PPE family protein PPE24	PE/PPE
3	RVBD_1787	Rv1787	-1.22255	1.15068	PPE25	PPE family protein PPE25	PE/PPE
4	RVBD_1790	Rv1790	-1.1317	1.05895	PPE27	PPE family protein PPE27	PE/PPE
5	RVBD_1791	Rv1791	-4.22084	4.14094	PE19	PE family protein PE19	PE/PPE
6	RVBD_1803c	Rv1803c	-3.7754	3.70613	PE_PGRS32	PE-PGRS family protein PE_PGRS32	PE/PPE
7	RVBD_2340c	Rv2340c	-3.48022	3.40925	PE_PGRS39	PE-PGRS family protein PE_PGRS39	PE/PPE
8	RVBD_3135	Rv3135	-3.41784	3.34251	PPE50	PPE family protein PPE50	PE/PPE
9	RVBD_3159c	Rv3159c	-1.20822		PPE53	PPE family protein PPE53	PE/PPE
10	RVBD_3511	Rv3511	-1.91211	1.84443	PE_PGRS55	PE-PGRS family protein PE_PGRS55	PE/PPE
11	RVBD_3512	Rv3512	-9.56163	9.49165	PE_PGRS56	PE-PGRS family protein PE_PGRS56	PE/PPE
12	RVBD_3590c	Rv3590c	-2.31096	2.24492	PE_PGRS58	PE-PGRS family protein PE_PGRS58	PE/PPE
	RNA processing
1	RVBD_1340	Rv1340	-6.54954	6.45967	rphA	Probable ribonuclease RphA (RNase PH) (tRNA nucleotidyltransferase)	information pathways			phosphorolytic ribonuclease (RNase PH)is involved in the 3′ processing of RNAs. RNase PH removes nucleotides downstream of the 3′-CCA sequence, required for aminoacylation of tRNAs, from tRNA precursors with 3′ extensions. It is also involved in other RNA maturation and quality control processes, including the maturation of rRNA (https://doi.org/10.1126/sciadv.abb6651).
2	RVBD_1694	Rv1694	-2.6688	2.59665	tlyA	2'-O-methyltransferase TlyA	virulence, detoxification, adaptation			Catalyzes the 2'-O-methylation at nucleotides C1409 in 16S rRNA and C1920 in 23S rRNA (PubMed:16857584, PubMed:20854656).Is likely involved in ribosomal biogenesis (PubMed:21443791).hemolysin
3	RVBD_2444c	Rv2444c	-6.58698		rne	Possible ribonuclease E Rne	information pathways			cellular homeostasis (https://doi.org/10.1016/j.isci.2022.104233)
4	RVBD_2733c	Rv2733c	-3.96449	3.89259	Rv2733c	Conserved hypothetical alanine, arginine-rich protein	conserved hypotheticals		TR-2-METHYLTHIO-N(6)-DIMETHYLALLYLADENOSINE SYNTHASE (PTHR43020:SF1)	Catalyzes the methylthiolation of N6-(dimethylallyl)adenosine (i6A), leading to the formation of 2-methylthio-N6-(dimethylallyl)adenosine (ms2i6A) at position 37 in tRNAs that read codons beginning with uridine (Uniprot)
5	RVBD_2752c	Rv2752c	-4.15003	4.04914	Rv2752c	Conserved hypothetical protein	conserved hypotheticals		SUBFAMILY NOT MED (PTHR43694:SF1)	bifunctional β-lactamase/ribonuclease (https://doi.org/10.1134/S0006297911030096)
6	RVBD_2822c	Rv2822c	-3.73336		Rv2822c	Hypothetical protein	conserved hypotheticals			Endonuclease that displays both RNase H activity with a hybrid RNA/DNA substrate as well as double-stranded RNase activity. As the only authenticated RNase HI in M.tuberculosis, probably plays an important role in the physiology of this organism, being likely involved in bacterial replication. Has a possible role in B12 recycling, but the primary role of the C-terminal domain of this phosphatase …
7	RVBD_3009c	Rv3009c	-2.48221	2.41068	gatB	Probable glutamyl-tRNA(GLN) amidotransferase (subunit B) GatB (Glu-ADT subunit B)	information pathways			GatB specifically recognizes the misacylated tRNA complexes and subsequently performs the amidotransferase reaction;Allows the formation of correctly charged Asn-tRNA(Asn) or Gln-tRNA(Gln) through the transamidation of misacylated Asp-tRNA(Asn) or Glu-tRNA(Gln) in organisms which lack either or both of asparaginyl-tRNA or glutaminyl-tRNA synthetases.(https://doi.org/10.3389/fmicb.2020.577756)
	Lipid metabolism
1	RVBD_0166	Rv0166	-1.45672	1.3837	fadD5	Probable fatty-acid-CoA ligase FadD5 (fatty-acid-CoA synthetase) (fatty-acid-CoA synthase)	lipid metabolism
2	RVBD_0221	Rv0221	-1.62318	1.55041	Rv0221	Possible triacylglycerol synthase (diacylglycerol acyltransferase)	lipid metabolism
3	RVBD_0244c	Rv0244c	-8.95096	8.87703	fadE5	Probable acyl-CoA dehydrogenase FadE5	lipid metabolism
4	RVBD_0270	Rv0270	-6.61444	6.54565	fadD2	Probable fatty-acid-CoA ligase FadD2 (fatty-acid-CoA synthetase) (fatty-acid-CoA synthase)	lipid metabolism
5	RVBD_0400c	Rv0400c	-3.81968		fadE7	Acyl-CoA dehydrogenase FadE7	lipid metabolism
6	RVBD_0632c	Rv0632c	-2.38077	2.30975	echA3	Probable enoyl-CoA hydratase EchA3 (enoyl hydrase) (unsaturated acyl-CoA hydratase) (crotonase)	lipid metabolism
7	RVBD_0973c	Rv0973c	-2.68536		accA2	Probable acetyl-/propionyl-coenzyme A carboxylase alpha chain (alpha subunit) AccA2: biotin carboxylase + biotin carboxyl carrier protein (BCCP)	lipid metabolism
8	RVBD_1013	Rv1013	-2.56007	2.48635	pks16	Putative polyketide synthase Pks16	lipid metabolism
9	RVBD_1142c	Rv1142c	-2.05941		echA10	Probable enoyl-CoA hydratase EchA10 (enoyl hydrase) (unsaturated acyl-CoA hydratase) (crotonase)	lipid metabolism
10	RVBD_1206	Rv1206	-6.46533	6.39619	fadD6	Probable fatty-acid-CoA ligase FadD6 (fatty-acid-CoA synthetase) (fatty-acid-CoA synthase)	lipid metabolism
11	RVBD_1467c	Rv1467c	-1.59892	1.52972	fadE15	Probable acyl-CoA dehydrogenase FadE15	lipid metabolism
12	RVBD_1544	Rv1544	-3.93171	3.85888	Rv1544	Possible ketoacyl reductase	lipid metabolism
13	RVBD_1550	Rv1550	-4.94227	4.86863	fadD11	Probable fatty-acid-CoA ligase FadD11 (fatty-acid-CoA synthetase) (fatty-acid-CoA synthase)	lipid metabolism
14	RVBD_3504	Rv3504	-1.63963	1.56836	fadE26	Probable acyl-CoA dehydrogenase FadE26	lipid metabolism			cholesterol degradation (https://doi.org/10.1128/JB.00502-13)
15	RVBD_3523	Rv3523	-1.57614		ltp3	Probable lipid carrier protein or keto acyl-CoA thiolase Ltp3	lipid metabolism
16	RVBD_3556c	Rv3556c	-2.88977	2.82003	fadA6	Probable acetyl-CoA acetyltransferase FadA6 (acetoacetyl-CoA thiolase)	lipid metabolism			cholesterol degradation (https://doi.org/10.1093/femspd/fty021)
	N2 metabolism
1	RVBD_2918c	Rv2918c	-4.2253	4.15064	glnD	Probable [protein-PII] uridylyltransferase GlnD (PII uridylyl- transferase) (uridylyl removing enzyme) (UTASE)	intermediary metabolism and respiration			intracellular N2 sensor, ammonia assimilation; N2 metabolism (doi:10.1016/j.tube.2006.12.003,https://doi.org/10.1111/j.1574-6976.2010.00216.x)
	Cell division
1	RVBD_2345	Rv2345	-5.96276	5.89148	Rv2345	Possible conserved transmembrane protein	cell wall and cell processes			phosphatase involved in Cell division (https://doi.org/10.1016/j.pep.2015.03.003)
2	RVBD_2553c	Rv2553c	-4.11033		Rv2553c	Probable conserved membrane protein	cell wall and cell processes			Cell division; putative transglycosylase (https://doi.org/10.3389/fmicb.2021.626461)
	Transferases
1	RVBD_3263	Rv3263	-1.30184		Rv3263	Probable DNA methylase (modification methylase) (methyltransferase)	information pathways			mamA; required under hypoxia (https://doi.org/10.1371/journal.ppat.1003419)
2	RVBD_0089	Rv0089	-2.65875	2.58624	Rv0089	Possible methyltransferase/methylase	intermediary metabolism and respiration
3	RVBD_0567	Rv0567	-1.69691	1.62409	Rv0567	Probable methyltransferase/methylase	intermediary metabolism and respiration
4	RVBD_0802c	Rv0802c	-3.69138	3.61964	Rv0802c	Possible succinyltransferase in the GCN5-related N-acetyltransferase family	intermediary metabolism and respiration			Rv0802c can bring about succinylation as well as acetylation of MtHU and their modifications modulate the DNA-binding properties of MtHU(https://doi.org/10.1099/mic.0.001058)
5	RVBD_3034c	Rv3034c	-1.94879	1.87614	Rv3034c	Possible transferase	intermediary metabolism and respiration			Acetyltransferase;Regulates host peroxisome homeostasis in response to intracellular redox levels to favor mycobacterial infection in macrophage (PubMed:32388919).
6	RVBD_3814c	Rv3814c	-2.9182	2.84199	Rv3814c	Possible acyltransferase	intermediary metabolism and respiration			1-acylglycerol-3-phosphate O-acyltransferase activity (Uniprot)
7	RVBD_3817	Rv3817	-3.08429	3.00814	Rv3817	Possible phosphotransferase	intermediary metabolism and respiration
8	RVBD_2416c	Rv2416c	-2.69956	2.62363	eis	Enhanced intracellular survival protein Eis, GCN5-related N-acetyltransferase	virulence, detoxification, adaptation			acetylation status of HupB to remodel the mycobacterial chromosome(https://doi.org/10.1021/acs.biochem.7b01089)
9	RVBD_2739c	Rv2739c	-6.11693	6.04158	Rv2739c	Possible alanine rich transferase	intermediary metabolism and respiration
	Other proteins in Mtb redoxosome
1	RVBD_0090	Rv0090	-5.10335	5.02595	Rv0090	Possible membrane protein	cell wall and cell processes
2	RVBD_0128	Rv0128	-1.81705	1.74503	Rv0128	Probable conserved transmembrane protein	cell wall and cell processes
3	RVBD_0418	Rv0418	-3.22814	3.15061	lpqL	Probable lipoprotein aminopeptidase LpqL	cell wall and cell processes
4	RVBD_0420c	Rv0420c	-4.26408	4.18659	Rv0420c	Possible transmembrane protein	cell wall and cell processes
5	RVBD_0477	Rv0477	-2.55266	2.47568	Rv0477	Possible conserved secreted protein	cell wall and cell processes
6	RVBD_0544c	Rv0544c	-4.22775	4.15708	Rv0544c	Possible conserved transmembrane protein	cell wall and cell processes
7	RVBD_0875c	Rv0875c	-3.79902	3.7133	Rv0875c	Possible conserved exported protein	cell wall and cell processes			D binding protein(PC00009);isomerase(PC00135)
8	RVBD_0988	Rv0988	-4.25476	4.1814	Rv0988	Possible conserved exported protein	cell wall and cell processes
9	RVBD_1087A	Rv1087A	-1.91921	1.8443	Rv1087A	Conserved hypothetical protein	cell wall and cell processes
10	RVBD_1249c	Rv1249c	-2.00679	1.93719	Rv1249c	Possible membrane protein	cell wall and cell processes
11	RVBD_1291c	Rv1291c	-3.58792	3.50192	Rv1291c	Conserved hypothetical secreted protein	cell wall and cell processes
12	RVBD_1342c	Rv1342c	-5.03782	4.95312	Rv1342c	Conserved membrane protein	cell wall and cell processes
13	RVBD_1362c	Rv1362c	-2.37841	2.29885	Rv1362c	Possible membrane protein	cell wall and cell processes
14	RVBD_1758	Rv1758	-1.6665		cut1	Probable cutinase Cut1	cell wall and cell processes
15	RVBD_1761c	Rv1761c	-1.52938	1.45686	Rv1761c	Possible exported protein	cell wall and cell processes			https://doi.org/10.1002/pro.24
16	RVBD_1881c	Rv1881c	-1.23527	1.15859	lppE	Possible conserved lipoprotein LppE	cell wall and cell processes			hydrolase(PC00121)
17	RVBD_1892	Rv1892	-2.80852	2.7316	Rv1892	Probable membrane protein	cell wall and cell processes
18	RVBD_1999c	Rv1999c	-3.25551	3.17654	Rv1999c	Probable conserved integral membrane protein	cell wall and cell processes
19	RVBD_2273	Rv2273	-4.31487	4.24319	Rv2273	Probable conserved transmembrane protein	cell wall and cell processes
20	RVBD_2437	Rv2437	-5.05621	4.96471	Rv2437	Conserved transmembrane protein	cell wall and cell processes
21	RVBD_2637	Rv2637	-2.62621	2.554	dedA	Possible transmembrane protein DedA	cell wall and cell processes
22	RVBD_2668	Rv2668	-3.20989	3.13786	Rv2668	Possible exported alanine and valine rich protein	cell wall and cell processes
23	RVBD_2721c	Rv2721c	-1.30685	1.2341	Rv2721c	Possible conserved transmembrane alanine and glycine rich protein	cell wall and cell processes
24	RVBD_2723	Rv2723	-6.5903	6.51623	Rv2723	Probable conserved integral membrane protein	cell wall and cell processes
25	RVBD_2806	Rv2806	-3.44543		Rv2806	Possible membrane protein	cell wall and cell processes
26	RVBD_3104c	Rv3104c	-2.60203	2.52609	Rv3104c	Possible conserved transmembrane protein	cell wall and cell processes
27	RVBD_3194c	Rv3194c	-1.76805		Rv3194c	Possible conserved secreted protein	cell wall and cell processes			serine protease, adhesin (DOI: 10.1016/j.micpath.2020.104498)(https://doi.org/10.1016/j.tube.2019.101880)
28	RVBD_3217c	Rv3217c	-3.68095	3.60723	Rv3217c	Probable conserved integral membrane protein	cell wall and cell processes
29	RVBD_3335c	Rv3335c	-4.38651	4.31129	Rv3335c	Probable conserved integral membrane protein	cell wall and cell processes
30	RVBD_3481c	Rv3481c	-2.3883		Rv3481c	Probable integral membrane protein	cell wall and cell processes
31	RVBD_3576	Rv3576	-2.35212	2.27647	lppH	Possible conserved lipoprotein LppH	cell wall and cell processes
32	RVBD_3584	Rv3584	-1.81829		lpqE	Possible conserved lipoprotein LpqE	cell wall and cell processes
33	RVBD_3689	Rv3689	-1.09188		Rv3689	Probable conserved transmembrane protein	cell wall and cell processes			Mycobacterium tuberculosis cAMP receptor protein (CRPMt);doi: 10.1093/nar/gku548
34	RVBD_3694c	Rv3694c	-2.55894	2.48764	Rv3694c	Possible conserved transmembrane protein	cell wall and cell processes
35	RVBD_3843c	Rv3843c	-2.70861		Rv3843c	Probable conserved transmembrane protein	cell wall and cell processes
36	RVBD_3851	Rv3851	-3.36082		Rv3851	Possible membrane protein	cell wall and cell processes
37	RVBD_0029	Rv0029	-1.82594	1.75054	Rv0029	Conserved hypothetical protein	conserved hypotheticals
38	RVBD_0122	Rv0122	-3.7354	3.65459	Rv0122	Hypothetical protein	conserved hypotheticals
39	RVBD_0210	Rv0210	-2.23279	2.16229	Rv0210	Hypothetical protein	conserved hypotheticals
40	RVBD_0311	Rv0311	-3.08831	3.01467	Rv0311	Unknown protein	conserved hypotheticals
41	RVBD_0376c	Rv0376c	-1.44366		Rv0376c	Conserved hypothetical protein	conserved hypotheticals		SUBFAMILY NOT MED (PTHR30388:SF4)
42	RVBD_0443	Rv0443	-1.52522	1.4507	Rv0443	Conserved protein	conserved hypotheticals
43	RVBD_0481c	Rv0481c	-2.56962	2.49617	Rv0481c	Hypothetical protein	conserved hypotheticals
44	RVBD_0487	Rv0487	-1.95041	1.87874	Rv0487	Conserved hypothetical protein	conserved hypotheticals
45	RVBD_0498	Rv0498	-1.82174	1.75571	Rv0498	Conserved hypothetical protein	conserved hypotheticals		SUBFAMILY NOT MED (PTHR12110:SF21)
46	RVBD_0614	Rv0614	-1.88066	1.81162	Rv0614	Conserved hypothetical protein	conserved hypotheticals
47	RVBD_0801	Rv0801	-3.02786	2.951	Rv0801	Conserved protein	conserved hypotheticals		SUBFAMILY NOT MED (PTHR35908:SF1)
48	RVBD_0810c	Rv0810c	-5.53785	5.42046	Rv0810c	Conserved hypothetical protein	conserved hypotheticals
49	RVBD_0826	Rv0826	-1.94697	1.87546	Rv0826	Conserved hypothetical protein	conserved hypotheticals		SUBFAMILY NOT MED (PTHR36151:SF3)
50	RVBD_0854	Rv0854	-2.07412	2.00197	Rv0854	Conserved protein	conserved hypotheticals		SUBFAMILY NOT MED (PTHR39683:SF4)
51	RVBD_0877	Rv0877	-3.25776	3.18597	Rv0877	Conserved hypothetical protein	conserved hypotheticals
52	RVBD_0942	Rv0942	-3.05129	2.97505	Rv0942	Hypothetical protein	conserved hypotheticals
53	RVBD_0963c	Rv0963c	-4.47574	4.40184	Rv0963c	Conserved hypothetical protein	conserved hypotheticals
54	RVBD_0997	Rv0997	-2.98465	2.91272	Rv0997	Hypothetical protein	conserved hypotheticals
55	RVBD_1012	Rv1012	-6.44559	6.37187	Rv1012	Hypothetical protein	conserved hypotheticals
56	RVBD_1043c	Rv1043c	-2.47671	2.40238	Rv1043c	Conserved hypothetical protein	conserved hypotheticals			HtrA-like serine protease Rv1043c(https://doi.org/10.4161/viru.22329)
57	RVBD_1111c	Rv1111c	-1.36124	1.28983	Rv1111c	Conserved hypothetical protein	conserved hypotheticals
58	RVBD_1134	Rv1134	-5.21598	5.12834	Rv1134	Hypothetical protein	conserved hypotheticals
59	RVBD_1154c	Rv1154c	-4.62637	4.55436	Rv1154c	Hypothetical protein	conserved hypotheticals		SUBFAMILY NOT MED (PTHR36439:SF1)
60	RVBD_1176c	Rv1176c	-2.0628	1.98786	Rv1176c	Conserved hypothetical protein	conserved hypotheticals		SUBFAMILY NOT MED (PTHR43252:SF4)	attenuated in primates (https://doi.org/10.1086/652497)
61	RVBD_1268c	Rv1268c	-1.63019	1.55805	Rv1268c	Hypothetical protein	conserved hypotheticals			metalloprotease(PC00153)
62	RVBD_1290A	Rv1290A	-4.91465		Rv1290A	Hypothetical protein	conserved hypotheticals
63	RVBD_1341	Rv1341	-5.98393	5.90604	Rv1341	Conserved protein	conserved hypotheticals		INOSINE TRIPHOSPHATE PYROPHOSPHATASE (PTHR11067:SF9)
64	RVBD_1414	Rv1414	-2.56725		Rv1414	Conserved hypothetical protein	conserved hypotheticals		SUBFAMILY NOT MED (PTHR28004:SF7)
65	RVBD_1515c	Rv1515c	-3.53212	3.45052	Rv1515c	Conserved hypothetical protein	conserved hypotheticals			RD6 gene; stress response (https://doi.org/10.1016/j.micpath.2021.104778)
66	RVBD_1519	Rv1519	-3.86592	3.78406	Rv1519	Conserved hypothetical protein	conserved hypotheticals		SUBFAMILY NOT MED (PTHR30244:SF9)	aspartic protease(PC00053); directly regulated by IdeR (https://doi.org/10.1128/IAI.73.9.5988-5994.2005); upregulated on DosR induction(https://doi.org/10.1371/journal.pone.0035935)
67	RVBD_1632c	Rv1632c	-1.97825	1.90789	Rv1632c	Hypothetical protein	conserved hypotheticals
68	RVBD_1638A	Rv1638A	-3.14326		Rv1638A	Conserved hypothetical protein	conserved hypotheticals
69	RVBD_1716	Rv1716	-2.04232		Rv1716	Conserved hypothetical protein	conserved hypotheticals		SUBFAMILY NOT MED (PTHR43564:SF2)
70	RVBD_1738	Rv1738	-4.0346	3.9605	Rv1738	Conserved protein	conserved hypotheticals			the structure of Rv1738 revealed a surprising similarity to a family of stress proteins known as hibernation-promoting factors (HPFs). This suggests that the functional role of the up-regulated Rv1738 protein in nonreplicating persistence of Mtb is to contribute to the shutdown of ribosomal protein synthesis.(https://doi.org/10.1073/pnas.1422387112)
71	RVBD_1765c	Rv1765c	-2.2233	2.15349	Rv1765c	Conserved hypothetical protein	conserved hypotheticals
72	RVBD_1769	Rv1769	-2.01777	1.94648	Rv1769	Conserved protein	conserved hypotheticals		SUBFAMILY NOT MED (PTHR28004:SF7)
73	RVBD_1770	Rv1770	-2.11075	2.03815	Rv1770	Conserved protein	conserved hypotheticals		ALKALINE PHOSPHATASE ISOZYME CONVERSION PROTEIN (PTHR12147:SF41)
74	RVBD_1775	Rv1775	-1.92355		Rv1775	Conserved hypothetical protein	conserved hypotheticals
75	RVBD_1778c	Rv1778c	-2.57991		Rv1778c	Unknown protein	conserved hypotheticals
76	RVBD_1813c	Rv1813c	-2.31585	2.23971	Rv1813c	Conserved hypothetical protein	conserved hypotheticals
77	RVBD_1831	Rv1831	-2.33798	2.26419	Rv1831	Hypothetical protein	conserved hypotheticals
78	RVBD_1864c	Rv1864c	-1.86687	1.79409	Rv1864c	Conserved protein	conserved hypotheticals		PROTEIN YIIM (PTHR30212:SF2)	attenuated in primates (https://doi.org/10.1086/652497)
79	RVBD_1871c	Rv1871c	-1.96289	1.88626	Rv1871c	Conserved protein	conserved hypotheticals
80	RVBD_1889c	Rv1889c	-4.36162	4.2785	Rv1889c	Conserved hypothetical protein	conserved hypotheticals		SUBFAMILY NOT MED (PTHR43619:SF3)
81	RVBD_1924c	Rv1924c	-1.6621	1.58785	Rv1924c	Unknown protein	conserved hypotheticals
82	RVBD_1954c	Rv1954c	-2.61158		Rv1954c	Hypothetical protein	conserved hypotheticals
83	RVBD_1975	Rv1975	-1.59733	1.52644	Rv1975	Conserved hypothetical protein	conserved hypotheticals		SUBFAMILY NOT MED (PTHR31157:SF24)
84	RVBD_2184c	Rv2184c	-2.47454	2.40215	Rv2184c	Conserved hypothetical protein	conserved hypotheticals		ANION-TRANSPORTING ATPASE-RELATED (PTHR10803:SF0)
85	RVBD_2293c	Rv2293c	-3.15694	3.07325	Rv2293c	Conserved hypothetical protein	conserved hypotheticals
86	RVBD_2406c	Rv2406c	-2.84947	2.77527	Rv2406c	Conserved protein	conserved hypotheticals		SUBFAMILY NOT MED (PTHR43080:SF2)
87	RVBD_2410c	Rv2410c	-2.01814	1.94331	Rv2410c	Conserved protein	conserved hypotheticals		SUBFAMILY NOT MED (PTHR34595:SF2)
88	RVBD_2423	Rv2423	-1.61522	1.54238	Rv2423	Hypothetical protein	conserved hypotheticals
89	RVBD_2432c	Rv2432c	-4.54294	4.44527	Rv2432c	Hypothetical protein	conserved hypotheticals
90	RVBD_2510c	Rv2510c	-2.05037		Rv2510c	Conserved protein	conserved hypotheticals		SUBFAMILY NOT MED (PTHR30121:SF6)
91	RVBD_2551c	Rv2551c	-3.38716	3.3165	Rv2551c	Conserved hypothetical protein	conserved hypotheticals		LEADER PEPTIDASE PPPA-RELATED (PTHR30487:SF0)
92	RVBD_2561	Rv2561	-2.06247		Rv2561	Conserved hypothetical protein	conserved hypotheticals
93	RVBD_2705c	Rv2705c	-2.10453	2.03072	Rv2705c	Conserved hypothetical protein	conserved hypotheticals		SUBFAMILY NOT MED (PTHR34129:SF1)
94	RVBD_2706c	Rv2706c	-3.74299	3.66251	Rv2706c	Hypothetical protein	conserved hypotheticals
95	RVBD_2722	Rv2722	-3.06006	2.98025	Rv2722	Conserved hypothetical protein	conserved hypotheticals
96	RVBD_2738c	Rv2738c	-8.37762	8.29776	Rv2738c	Conserved hypothetical protein	conserved hypotheticals
97	RVBD_2778c	Rv2778c	-1.95791	1.88365	Rv2778c	Conserved protein	conserved hypotheticals
98	RVBD_2797c	Rv2797c	-1.96264	1.89176	Rv2797c	Conserved hypothetical protein	conserved hypotheticals
99	RVBD_2807	Rv2807	-2.31262	2.23991	Rv2807	Conserved hypothetical protein	conserved hypotheticals
100	RVBD_2826c	Rv2826c	-5.03813	4.96006	Rv2826c	Hypothetical protein	conserved hypotheticals			MenT4, nucleotidyltransferase toxin;inhibits growth of Mycobacterium tuberculosis through inactivation of tRNA acceptor stems(https://doi.org/10.1126/sciadv.abb6651)
101	RVBD_2840c	Rv2840c	-2.26017	2.18874	Rv2840c	Conserved hypothetical protein	conserved hypotheticals		SUBFAMILY NOT MED (PTHR34215:SF1)
102	RVBD_2917	Rv2917	-1.12816		Rv2917	Conserved hypothetical alanine and arginine rich protein	conserved hypotheticals
103	RVBD_3033	Rv3033	-3.35085	3.27124	Rv3033	Unknown protein	conserved hypotheticals			Anti-apoptotic protein (https://doi.org/10.3389/fimmu.2018.02136)
104	RVBD_3098c	Rv3098c	-3.02331	2.94758	Rv3098c	Hypothetical protein	conserved hypotheticals
105	RVBD_3169	Rv3169	-2.19662		Rv3169	Conserved protein	conserved hypotheticals
106	RVBD_3179	Rv3179	-1.85312	1.77893	Rv3179	Conserved protein	conserved hypotheticals		SUBFAMILY NOT MED (PTHR43566:SF2)
107	RVBD_3226c	Rv3226c	-3.97724	3.89972	Rv3226c	Conserved hypothetical protein	conserved hypotheticals		EMBRYONIC STEM CELL-SPECIFIC 5-HYDROXYMETHYLCYTOSINE-BINDING PROTEIN (PTHR13604:SF0)
108	RVBD_3354	Rv3354	-1.1617		Rv3354	Conserved hypothetical protein	conserved hypotheticals
109	RVBD_3360	Rv3360	-3.9211	3.83074	Rv3360	Conserved hypothetical protein	conserved hypotheticals
110	RVBD_3471c	Rv3471c	-1.83817		Rv3471c	Conserved hypothetical protein	conserved hypotheticals		SUBFAMILY NOT MED (PTHR36114:SF8)
111	RVBD_3577	Rv3577	-1.77971		Rv3577	Conserved hypothetical protein	conserved hypotheticals
112	RVBD_3613c	Rv3613c	-6.4509		Rv3613c	Hypothetical protein	conserved hypotheticals			Virulence (doi:10.1371/journal.pone.0011066)
113	RVBD_3733c	Rv3733c	-3.39983	3.32574	Rv3733c	Conserved hypothetical protein	conserved hypotheticals		BIS(5'-NUCLEOSYL)-TETRAPHOSPHATASE [ASYMMETRICAL] (PTHR21340:SF0)	Nudix hydrolases (http://dx.doi.org/10.1128/JB.02102-12)
114	RVBD_3735	Rv3735	-1.43946	1.36563	Rv3735	Conserved hypothetical protein	conserved hypotheticals		SUBFAMILY NOT MED (PTHR36155:SF1)
115	RVBD_3745c	Rv3745c	-3.43343	3.35512	Rv3745c	Conserved hypothetical protein	conserved hypotheticals		SUBFAMILY NOT MED (PTHR37466:SF1)
116	RVBD_3850	Rv3850	-2.87787	2.79892	Rv3850	Conserved protein	conserved hypotheticals
117	RVBD_0041	Rv0041	-2.81933	2.74276	leuS	Probable leucyl-tRNA synthetase LeuS (leucine--tRNA ligase) (LEURS)	information pathways
118	RVBD_0071	Rv0071	-2.11546	2.03907	Rv0071	Possible maturase	information pathways
119	RVBD_0684	Rv0684	-5.8536		fusA1	Probable elongation factor G FusA1 (EF-G)	information pathways			Translation
120	RVBD_3052c	Rv3052c	-3.44277	3.35625	nrdI	Probable NrdI protein	information pathways
121	RVBD_0094c	Rv0094c	-1.58989	1.51971	Rv0094c	Conserved hypothetical protein	insertion seqs and phages
122	RVBD_0393	Rv0393	-1.62283		Rv0393	Conserved 13E12 repeat family protein	insertion seqs and phages
123	RVBD_1588c	Rv1588c	-1.82946	1.7594	Rv1588c	Partial REP13E12 repeat protein	insertion seqs and phages
124	RVBD_2087	Rv2087	-2.55741	2.47988	Rv2087	Conserved hypothetical protein	insertion seqs and phages
125	RVBD_2656c	Rv2656c	-2.36109		Rv2656c	Possible PhiRv2 prophage protein	insertion seqs and phages
126	RVBD_2657c	Rv2657c	-3.41495	3.34197	Rv2657c	Probable PhiRv2 prophage protein	insertion seqs and phages
127	RVBD_2666	Rv2666	-1.81837		Rv2666	Probable transposase for insertion sequence element IS1081 (fragment)	insertion seqs and phages
128	RVBD_3428c	Rv3428c	-2.37831	2.30479	Rv3428c	Possible transposase	insertion seqs and phages
129	RVBD_3466	Rv3466	-2.13549	2.06467	Rv3466	Conserved hypothetical protein	insertion seqs and phages			upregulated in dormany (https://doi.org/10.1016/j.meegid.2012.03.023)
130	RVBD_3467	Rv3467	-1.49754	1.42765	Rv3467	Conserved hypothetical protein	insertion seqs and phages
131	RVBD_3638	Rv3638	-2.74002	2.66702	Rv3638	Possible transposase	insertion seqs and phages
132	RVBD_3751	Rv3751	-2.96399		Rv3751	Probable integrase (fragment)	insertion seqs and phages
133	RVBD_3798	Rv3798	-1.63067	1.55937	Rv3798	Probable transposase	insertion seqs and phages
134	RVBD_3827c	Rv3827c	-2.06353		Rv3827c	Possible transposase	insertion seqs and phages
135	RVBD_3844	Rv3844	-3.68895	3.61234	Rv3844	Possible transposase	insertion seqs and phages
136	RVBD_0161	Rv0161	-1.92057	1.84926	Rv0161	Possible oxidoreductase	intermediary metabolism and respiration
137	RVBD_0319	Rv0319	-4.30271	4.22479	pcp	Probable pyrrolidone-carboxylate peptidase Pcp (5-oxoprolyl-peptidase) (pyroglutamyl-peptidase I) (PGP-I) (pyrase)	intermediary metabolism and respiration
138	RVBD_0322	Rv0322	-2.15414	2.08357	udgA	Probable UDP-glucose 6-dehydrogenase UdgA (UDP-GLC dehydrogenase) (UDP-GLCDH) (UDPGDH)	intermediary metabolism and respiration
139	RVBD_0373c	Rv0373c	-2.15622	2.08395	Rv0373c	Probable carbon monoxyde dehydrogenase (large chain)	intermediary metabolism and respiration
140	RVBD_0770	Rv0770	-3.66616	3.58566	Rv0770	Probable dehydrogenase/reductase	intermediary metabolism and respiration
141	RVBD_1089A	Rv1089A	-2.33117		celA2a	Probable cellulase CelA2a (endo-1,4-beta-glucanase) (endoglucanase) (carboxymethyl cellulase)	intermediary metabolism and respiration			Cellulose to glucose degradation; Mycobrowser
142	RVBD_1105	Rv1105	-1.79646		Rv1105	Possible para-nitrobenzyl esterase (fragment)	intermediary metabolism and respiration
143	RVBD_1774	Rv1774	-2.11196	2.03707	Rv1774	Probable oxidoreductase	intermediary metabolism and respiration
144	RVBD_1851	Rv1851	-3.3822	3.3023	ureF	Urease accessory protein UreF	intermediary metabolism and respiration
145	RVBD_1900c	Rv1900c	-2.00405	1.93301	lipJ	Probable lignin peroxidase LipJ	intermediary metabolism and respiration
146	RVBD_2129c	Rv2129c	-2.29942		Rv2129c	Probable oxidoreductase	intermediary metabolism and respiration
147	RVBD_2766c	Rv2766c	-1.91762	1.8439	Rv2766c	Probable short-chain type dehydrogenase/reductase	intermediary metabolism and respiration
148	RVBD_3303c	Rv3303c	-2.20624	2.12164	lpdA	NAD(P)H quinone reductase LpdA	intermediary metabolism and respiration
149	RVBD_3419c	Rv3419c	-4.43244	4.33967	gcp	Probable O-sialoglycoprotein endopeptidase Gcp (glycoprotease)	intermediary metabolism and respiration
150	RVBD_2997	Rv2997	-2.48704		Rv2997	Possible alanine rich dehydrogenase	intermediary metabolism and respiration			The noxR1 gene locus in M. bovis BCG bestows ability to resist RNI generated in vitro. In M. tuberculosis H37Rv, however, noxR1 is either not involved in RNI resistance and virulence or is better compensated for by other mechanisms (doi: 10.1054/tuld.2000.0251,https://doi.org/10.1084/jem.186.11.1885)
151	RVBD_2190Ac	Rv2190Ac	-2.08254	2.01426
152	RVBD_2468Ac	Rv2468Ac	-4.34758	4.26106
153	RVBD_3216	Rv3216	-1.69071	1.62054
