# Supplementary material for: Biosensor-integrated transposon mutagenesis reveals rv0158 as a coordinator of redox homeostasis in Mycobacterium tuberculosis
Source: eLife. 2023 Aug 29;12:e80218. doi: 10.7554/eLife.80218 (PMC10501769; doi:10.7554/eLife.80218)
Supplement: Supplementary file 4. [file elife-80218-supp4.xlsx]

## Sheet: Sheet1
List of differentially expressed genes in untreated rv0158 KO Mtb relative to untreated wild-type Mtb (FDR< 0.05, fold change>1.5)
KO_UT vs WT_UT	logFC	logCPM	PValue	FDR		LOCUS TAG	START SITE	END SITE	STRAND	GENE	PRODUCT	COMMENT			FUNCTIONAL CATEGORY
Rv0128	0.76967	3.77221	0.000146229	0.00502181		Rv0128	155667	156446	+	Rv0128	Probable conserved transmembrane protein	Comments=Rv0128, (MTCI5.02), len: 259 aa. Probable conserved transmembrane protein, with some similarity to Rv3064c and other bacterial proteins e.g. AAK85977.1|AE007957|AGR_C_254p from Agrobacterium tumefaciens (206 aa).	UniProt_AC=P96805	Is_Pseudogene=No	cell wall and cell processes
Rv0514	-0.595075	3.39966	0.00287116	0.0470122		Rv0514	606149	606448	+	Rv0514	Possible transmembrane protein	Comments=Rv0514, (MTCY20G10.04), len: 99 aa. Possible transmembrane protein.	UniProt_AC=O33359	Is_Pseudogene=No	cell wall and cell processes
Rv0842	-0.96077	3.88267	6.59587e-07	4.53032e-05		Rv0842	938112	939404	+	Rv0842	Probable conserved integral membrane protein	Comments=Rv0842, (MT0864, MTV043.35), len: 430 aa. Probable conserved integral membrane protein, showing similarity with other integral membrane proteins e.g. P28246|BCR_ECOLI bicyclomycin resistance protein from EScherichia coli (396 aa), FASTA scores: opt: 216, E(): 5.4e-07, (23.7% identity in 376 aa overlap)	UniProt_AC=O53854	Is_Pseudogene=No	cell wall and cell processes
Rv0867c	0.939695	4.72804	1.83942e-06	0.000112521		Rv0867c	964312	965535	-	rpfA	Possible resuscitation-promoting factor RpfA	Comments=Rv0867c, (MTV043.60c), len: 407 aa. Possible rpfA, resuscitation-promoting factor (see citation below). N-terminus highly similar to N-terminal part (1-125 aa) of Z99494|MLCB57_3|NP_302417.1|NC_002677 conserved hypothetical protein from Mycobacterium leprae (174 aa), FASTA scores: opt: 785, E(): 1.8e-18, (63.0% identity in 200 aa overlap)	UniProt_AC=O53879	Is_Pseudogene=No	cell wall and cell processes
Rv1115	0.895811	2.09837	0.00192886	0.0357391		Rv1115	1240187	1240885	+	Rv1115	Possible exported protein	Comments=Rv1115, (MTCY22G8.04), len: 232 aa. Possible exported protein, contains possible N-terminal signal sequence.	UniProt_AC=O06567	Is_Pseudogene=No	cell wall and cell processes
Rv1198	-1.06901	7.13635	1.24417e-06	7.85631e-05		Rv1198	1341006	1341290	+	esxL	Putative ESAT-6 like protein EsxL (ESAT-6 like protein 4)	Comments=Rv1198, (MT1236, MTCI364.10), len: 94 aa. EsxL, ESAT-6 like protein (see citation below). Member of the ESAT-6 family with Rv3619c, Rv1037c, etc. Almost identical to MTCY10G2.12 (94 aa) (97.9% identity in 94 aa overlap) and MTCY98.022c (94 aa) (94.7% identity in 94 aa overlap). Highly similar to Q49946|U1756D Mycobacterium leprae (95 aa), FASTA scores: opt: 403, E(): 1.1e-22, (64.1% iden…	UniProt_AC=O05300	Is_Pseudogene=No	cell wall and cell processes
Rv1227c	-1.2064	0.946274	0.00128217	0.0262811		Rv1227c	1370292	1370825	-	Rv1227c	Probable transmembrane protein	Comments=Rv1227c, (MTCI61.10c), len: 177 aa. Possible transmembrane protein, similar to P96615 hypothetical protein ydbS from Bacillus subtilis (159 aa), fasta scores: E(): 3.6e-07, (30.1% identity in 163 aa overlap).	UniProt_AC=O33223	Is_Pseudogene=No	cell wall and cell processes
Rv1271c	-0.62629	3.32832	0.00176842	0.0337148		Rv1271c	1419961	1420302	-	Rv1271c	Conserved hypothetical secreted protein	Comments=Rv1271c, (MTCY50.11), len: 113 aa. Conserved hypothetical exported protein with potential N-terminal signal sequence. Similar to Mycobacterium tuberculosis hypothetical proteins Rv1804c, Rv1810, Rv0622, etc.	UniProt_AC=P64793	Is_Pseudogene=No	cell wall and cell processes
Rv1811	0.673075	3.99673	0.000727296	0.0170501		Rv1811	2053443	2054147	+	mgtC	Possible Mg2+ transport P-type ATPase C MgtC	Comments=Rv1811, (MTCY16F9.03c), len: 234 aa. Possible mgtC, magnesium (Mg2+) transport P-type ATPase C (transmembrane protein), highly similar to many e.g. NP_442124.1|NC_000911 Mg2+ transport ATPase from Synechocystis sp. strain PCC 6803 (234 aa)	UniProt_AC=O07221	Is_Pseudogene=No	cell wall and cell processes
Rv1860	0.702597	4.04674	0.00025315	0.00750819		Rv1860	2107736	2108713	+	apa	Alanine and proline rich secreted protein Apa (fibronectin attachment protein) (immunogenic protein MPT32) (antigen MPT-32) (45-kDa glycoprotein) (45/47 kDa antigen)	Comments=Rv1860, (MT1908, MTCY359.0013), len: 325 aa. Apa (alternate gene names: mpt32, modD), Ala-, Pro-rich 45/47 kDa secreted protein, very similar to P46842|N43L_MYCLE from Mycobacterium leprae (287 aa), FASTA scores: opt: 1166, E(): 0, (66.4% identity in 298 aa overlap). Known to be glycosylated fibronectin-binding protein (see some citations). Changes in the mannosylation pattern of this pr…	UniProt_AC=Q50906	Is_Pseudogene=No	cell wall and cell processes
Rv2301	1.03575	3.23828	1.48787e-05	0.000746795		Rv2301	2573015	2573707	+	cut2	Probable cutinase Cut2	Comments=Rv2301, (MTCY339.08c), len: 230 aa. Probable cut2 (alternate gene name: cfp25), cutinase, highly similar to others from Mycobacteria tuberculosis e.g. MTCY13E12.04|Rv3451|O06318|CUT3_MYCTU (247 aa), FASTA scores: opt: 569, E(): 2.3e-27, (45.3% identity in 223 aa overlap)	UniProt_AC=P63881	Is_Pseudogene=No	cell wall and cell processes
Rv2543	-0.618241	5.23158	0.00139004	0.0283307		Rv2543	2866468	2867127	+	lppA	Probable conserved lipoprotein LppA	Comments=Rv2543, (MTCY159.13c), len: 219 aa. Probable lppA, conserved lipoprotein, highly similar to upstream ORF P95009|LPPB|Rv2544|MTCY159.12 putative lipoprotein LPPB from Mycobacterium tuberculosis (220 aa), FASTA scores: opt: 1240, E(): 1.1e-73, (87.15% identity in 218 aa overlap). Contains PS00013 Prokaryotic membrane lipoprotein lipid attachment site.	UniProt_AC=P95010	Is_Pseudogene=No	cell wall and cell processes
Rv2723	1.21095	5.06881	1.99228e-10	2.78564e-08		Rv2723	3034909	3036102	+	Rv2723	Probable conserved integral membrane protein	Comments=Rv2723, (MTCY154.03), len: 397 aa. Probable conserved integral membrane protein, highly similar to others e.g. Q9Z503|SCC54.23c putative integral membrane export protein from Streptomyces coelicolor (333 aa), FASTA scores: opt: 883, E(): 2.4e-48, (46.4% identity in 332 aa overlap)	UniProt_AC=P0A614	Is_Pseudogene=No	cell wall and cell processes
Rv2920c	-0.827678	2.86203	0.000389471	0.010814		Rv2920c	3231073	3232506	-	amt	Probable ammonium-transport integral membrane protein Amt	Comments=Rv2920c, (MTCY338.09c), len: 477 aa. Probable amt, ammonium-transport integral membrane protein (ala-, gly-, leu-, val-rich protein), highly similar to others e.g. Q9ZBP6|SC7A1.27 ammonium transporter from Streptomyces coelicolor (448 aa), FASTA scores: opt: 1246, E(): 7.3e-67, (54.1% identity in 462 aa overlap)	UniProt_AC=P63519	Is_Pseudogene=No	cell wall and cell processes
Rv2937	0.608628	4.80575	0.00274131	0.0454756		Rv2937	3273206	3274075	+	drrB	Daunorubicin-dim-transport integral membrane protein ABC transporter DrrB	Comments=Rv2937, (MTCY19H9.05), len: 289 aa. drrB, daunorubicin-dim-transport integral membrane protein ABC transporter, probably involved in daunorubicin resistance and phthiocerol dimycocerosate transport (see citations below), equivalent to Q49935|DRRB|ML2351|L518_F1_9 daunorubicin resistance transmembrane protein from Mycobacterium leprae (288 aa), FASTA scores: opt: 1252, E(): 5.3e-72, (64.0…	UniProt_AC=P96206	Is_Pseudogene=No	cell wall and cell processes
Rv3270	-0.670258	6.06012	0.0029169	0.0471886		Rv3270	3650526	3652682	+	ctpC	Probable metal cation-transporting P-type ATPase C CtpC	Comments=Rv3270, (MT3370, MTCY71.10), len: 718 aa. Probable ctpC, metal cation-transport ATPase P-type, integral membrane protein, equivalent to Q9CCL1|CTPC|ML0747 putative cation transport ATPase from Mycobacterium leprae (725 aa), FASTA scores: opt: 3908, E(): 0, (85.95% identity in 713 aa overlap). Also similar to O66027|MTAA metal transporting ATPase MTA72 from Mycobacterium tuberculosis (680…	UniProt_AC=P0A502	Is_Pseudogene=No	cell wall and cell processes
Rv3689	0.605902	4.43067	0.00105254	0.0230207		Rv3689	4130357	4131712	+	Rv3689	Probable conserved transmembrane protein	Comments=Rv3689, (MTV025.037), len: 451 aa. Probable conserved transmembrane protein, with Proline rich N-terminus, similar to Q9KYW6|SCE33.17 putative integral membrane protein from Streptomyces coelicolor (462 aa) FASTA scores: opt: 730, E(): 2.7e-21, (38.1% identity in 412 aa overlap).	UniProt_AC=O69657	Is_Pseudogene=No	cell wall and cell processes
Rv3871	-0.601146	6.67857	0.00228675	0.0396133		Rv3871	4348827	4350602	+	eccCb1	ESX conserved component EccCb1. ESX-1 type VII secretion system protein.	Comments=Rv3871, (MTV027.06), len: 591 aa. EccCb1, esx conserved component, ESX-1 type VII secretion system protein, equivalent to Q9CDD7|ML0052 hypothetical protein from Mycobacterium leprae (597 aa) FASTA scores: opt: 3341, E(): 9.8e-192, (80.85% identity in 596 aa overlap)	UniProt_AC=O69736	Is_Pseudogene=No	cell wall and cell processes
Rv3890c	0.76859	4.33573	0.000289341	0.00826841		Rv3890c	4373726	4374013	-	esxC	ESAT-6 like protein EsxC (ESAT-6 like protein 11)	Comments=Rv3890c, (MT4005, MTCY15F10.22), len: 95 aa. EsxC, ESAT-6 like protein (see Gey Van Pittius et al., 2001), equivalent to Q9K548|ES6B_MYCPA putative ESAT-6 like protein 11 (ORF3890C) from Mycobacterium paratuberculosis (95 aa), FASTA scores: opt: 490, E(): 3.3e-26, (76.85% identity in 95 aa overlap). Belongs to the ESAT6 family.	UniProt_AC=O05454	Is_Pseudogene=No	cell wall and cell processes
Rv3891c	0.823588	4.01262	7.3685e-05	0.0028282		Rv3891c	4374049	4374372	-	esxD	Possible ESAT-6 like protein EsxD	Comments=Rv3891c, (MTCY15F10.21), len: 107 aa (first GTG taken). EsxD, ESAT-6 like protein, equivalent to Q9K547 hypothetical 10.3 KDA protein (fragment) from Mycobacterium paratuberculosis (100 aa), FASTA scores: opt: 498, E(): 1.7e-26, (77.25% identity in 101 aa overlap). Seems to belong to the ESAT6 family (see Gey Van Pittius et al., 2001).	UniProt_AC=O05453	Is_Pseudogene=No	cell wall and cell processes
Rv3917c	-0.778982	5.42824	3.70238e-05	0.00168544		Rv3917c	4405457	4406491	-	parB	Probable chromosome partitioning protein ParB	Comments=Rv3917c, (MTV028.08c, MT4036), len: 344 aa. Probable parB, chromosome partitioning protein, equivalent to Q50201|PARB_MYCLE|ML2706 probable chromosome partitioning protein from Mycobacterium leprae (333 aa), FASTA scores: opt: 1654, E(): 1.6e-88, (78.6% identity in 332 aa overlap). Also highly similar to to others e.g. Q9S6U1|STH24.09 putative partitioning or sporulation protein from Str…	UniProt_AC=P0A5R2	Is_Pseudogene=No	cell wall and cell processes
Rv3918c	-0.753311	5.14896	5.58751e-05	0.00225517		Rv3918c	4406488	4407531	-	parA	Probable chromosome partitioning protein ParA	Comments=Rv3918c, (MTV028.09c), len: 347 aa. Probable parA, chromosome partitioning protein, highly similar to Q9CCX7|para|ML2707 putative cell division protein from Mycobacterium leprae (351 aa), FASTA scores: opt: 1679, E(): 2.9e-93, (78.1% identity in 347 aa overlap). Also highly similar to others e.g. Q9RFM1|para para protein from Streptomyces coelicolor (357 aa), FASTA scores: opt: 1197, E()…	UniProt_AC=Q1LVD4	Is_Pseudogene=No	cell wall and cell processes
Rv3919c	-0.670016	5.27423	0.000411448	0.0111091		Rv3919c	4407528	4408202	-	gid	Probable glucose-inhibited division protein B Gid	Comments=Rv3919c, (MT4038, MTV028.10c), len: 224 aa. Probable gid (alternate gene name: gidB), glucose-inhibited division protein B, equivalent, but shorter 20 aa, to Q9L7M3 putative GIDB (fragment) from Mycobacterium paratuberculosis (245 aa), FASTA scores: opt: 1018, E(): 4.8e-57, (73.95% identity in 211 aa overlap)	UniProt_AC=O53597	Is_Pseudogene=No	cell wall and cell processes
Rv0052	-0.679693	2.92379	0.00212047	0.0375641		Rv0052	57410	57973	+	Rv0052	Conserved protein	Comments=Rv0052, (MTCY21D4.15), len: 187 aa. Conserved protein, similar to others including Rv1930c from Mycobacterium tuberculosis (174 aa). May be a membrane protein.	UniProt_AC=P71709	Is_Pseudogene=No	conserved hypotheticals		SUBFAMILY NOT MED (PTHR43130:SF6)
Rv0078B	-0.883686	3.25927	3.82122e-05	0.00170554		Rv0078B	87798	88004	-	Rv0078B	Conserved protein	Comments=Rv0078B, len: 68 aa. Conserved protein.	UniProt_AC=	Is_Pseudogene=No	conserved hypotheticals
Rv0298	-0.590937	4.25511	0.00172696	0.0333057		Rv0298	363252	363479	+	Rv0298	Hypothetical protein	Comments=Rv0298, (MTCY63.03), len: 75 aa. Hypothetical unknown protein. This region is a possible MT-complex-specific genomic island (See Becq et al., 2007).	UniProt_AC=O07225	Is_Pseudogene=No	conserved hypotheticals
Rv0310c	0.763115	3.75069	0.000169294	0.00547757		Rv0310c	378657	379148	-	Rv0310c	Conserved protein	Comments=Rv0310c, (MTCY63.15c), len: 163 aa. Conserved protein, similar to some bile acid dehydratases e.g. P19412|BAIE_EUBSP|98749|D37844|1381566|AAC45413.1|U57489 bile acid-inducible operon protein E from Eubacterium sp (166 aa), FASTA scores: opt: 302, E(): 1e-11, (38.8% identity in 134 aa overlap)	UniProt_AC=O07237	Is_Pseudogene=No	conserved hypotheticals
Rv0692	0.947048	6.35934	1.20664e-06	7.74428e-05		Rv0692	791831	792160	+	Rv0692	Conserved hypothetical protein	Comments=Rv0692, (MTCY210.09), len: 109 aa. Conserved hypothetical protein, highly similar to U17129|RSU17129_3|AAC77477.1 unknown protein from Rhodococcus erythropolis (95 aa), FASTA scores: opt: 393, E(): 8.8e-22, (68.2% identity in 88 aa overlap).	UniProt_AC=P95038	Is_Pseudogene=No	conserved hypotheticals
Rv0760c	0.737229	3.88448	0.000184771	0.00578704		Rv0760c	854267	854686	-	Rv0760c	Conserved protein	Comments=Rv0760c, (MTCY369.05), len: 139 aa. Conserved protein, similar to N-termil part of Rv2042c conserved hypothetical protein from Mycobacterium tuberculosis (265 aa), FASTA scores: opt: 150, E(): 4.1e-05, (28.7% identity in 136 aa overlap). Belongs to the NTF2-like (nuclear transport factor 2) protein superfamiily.	UniProt_AC=P71817	Is_Pseudogene=No	conserved hypotheticals
Rv0822c	-1.35271	5.59868	2.79493e-12	4.75746e-10		Rv0822c	914257	916311	-	Rv0822c	Conserved protein	Comments=Rv0822c, (MTV043.14c), len: 684 aa. Conserved protein, highly similar in the region between aa 370 - 580 to U2266O|U15182|MLU15182_30 hypothetical protein from Mycobacterium leprae (222 aa), FASTA scores: opt: 819, E(): 0, (60.6% identity in 221 aa overlap). More extended similarity to Rv3267|Z92771|MTCY71_7 from Mycobacterium tuberculosis (498 aa), FASTA scores: opt: 434, E(): 2.2e-17, …	UniProt_AC=O53834	Is_Pseudogene=No	conserved hypotheticals		SUBFAMILY NOT MED (PTHR33392:SF6)
Rv0826	0.845615	2.79753	0.000776146	0.0177697		Rv0826	919634	920689	+	Rv0826	Conserved hypothetical protein	Comments=Rv0826, (MTV043.18), len: 351 aa. Conserved hypothetical protein, similar to CAB94053.1|AL358672|SC7A12.06 hypothetical protein from Streptomyces coelicolor (300 aa)	UniProt_AC=O53837	Is_Pseudogene=No	conserved hypotheticals		SUBFAMILY NOT MED (PTHR36151:SF3)
Rv0839	-0.659073	4.20996	0.00107183	0.0233124		Rv0839	935577	936389	+	Rv0839	Conserved hypothetical protein	Comments=Rv0839, (MTV043.32), len: 270 aa. Conserved hypothetical protein, similar to various hypothetical proteins or methyltransferases from yeast and bacteria e.g. T34740|SC1E6.19c|AL033505|SC1E6_19 hypothetical protein from Streptomyces coelicolor (273 aa), FASTA scores: opt: 1102, E(): 0, (58.6% identity in 263 aa overlap)	UniProt_AC=O53851	Is_Pseudogene=No	conserved hypotheticals		SUBFAMILY NOT MED (PTHR42912:SF30)	methyltransferase(PC00155)
Rv0885	-0.773872	5.70257	0.000492028	0.012842		Rv0885	982762	983784	+	Rv0885	Conserved hypothetical protein	Comments=Rv0885, (MTCY31.13), len: 340 aa. Conserved hypothetical protein, equivalent to O33063|MLCB57_18 possible transmembrane protein from Mycobacterium leprae (341 aa), FASTA score: (83.9% identity in 341 aa overlap). Also similar except in C-terminus to T35630 probable membrane protein from Streptomyces coelicolor (312 aa).	UniProt_AC=P0A5D5	Is_Pseudogene=No	conserved hypotheticals
Rv0950c	0.78085	4.49411	5.21671e-05	0.0021727		Rv0950c	1060656	1061654	-	Rv0950c	Conserved hypothetical protein	Comments=Rv0950c, (MTCY10D7.24), len: 332 aa. Conserved hypothetical protein, highly similar to AL035500|MLCL373.02c|T45433 hypothetical protein from Mycobacterium leprae (343 aa), FASTA scores: opt: 1500, E(): 0, (71.0% identity in 331 aa overlap). C-terminus highly similar to part of various proteins e.g. C-termil part of NP_441943.1|NC_000911|NlpD lipoprotein from Synechocystis sp (715 aa)	UniProt_AC=P71560	Is_Pseudogene=No	conserved hypotheticals		SUBFAMILY NOT MED (PTHR21666:SF270)
Rv0976c	3.17396	4.24891	2.56474e-43	1.0041e-39		Rv0976c	1088493	1090175	-	Rv0976c	Conserved hypothetical protein	Comments=Rv0976c, (MTV044.04c), len: 560 aa. Conserved hypothetical protein, highly similar to others e.g. CAB95890.1|AL359988 conserved hypothetical protein from Streptomyces coelicolor (558 aa)	UniProt_AC=O86320	Is_Pseudogene=No	conserved hypotheticals		SUBFAMILY NOT MED (PTHR47585:SF3)
Rv0991c	-0.815229	2.4828	0.00124858	0.0261059		Rv0991c	1108172	1108504	-	Rv0991c	Conserved serine rich protein	Comments=Rv0991c, (MTCI237.05c), len: 110 aa. Conserved ser-rich protein (especially in C-terminus), highly similar to N-terminus of NP_301255.1|NC_002677 conserved hypothetical protein (Ser-rich C-terminus) from Mycobacterium leprae (99 aa). Also highly similar to SCE22.04|AB90971.1|AL355832 hypothetical protein from Streptomyces coelicolor (110 aa)	UniProt_AC=O05574	Is_Pseudogene=No	conserved hypotheticals		SUBFAMILY NOT MED (PTHR34404:SF2)
Rv1179c	-0.668073	5.92355	0.000468645	0.0124813		Rv1179c	1310480	1313299	-	Rv1179c	Unknown protein	Comments=Rv1179c, MTV005.15c, len: 939 aa. Unknown protein.	UniProt_AC=O50435	Is_Pseudogene=No	conserved hypotheticals		TFIIH BASAL TRANSCRIPTION FACTOR COMPLEX HELICASE XPB SUBUNIT (PTHR11274:SF0)	D helicase(PC00011);hydrolase(PC00121)
Rv1265	-1.06532	5.0209	8.76723e-07	5.81757e-05		Rv1265	1413260	1413940	+	Rv1265	Unknown protein	Comments=Rv1265, (MTCY50.17c), len: 226 aa. Unknown protein (see citation below).	UniProt_AC=P64789	Is_Pseudogene=No	conserved hypotheticals
Rv1331	-0.614637	4.4256	0.00151327	0.0299046		Rv1331	1500661	1500966	+	Rv1331	Conserved hypothetical protein	Comments=Rv1331, (MTCY130.16), len: 101 aa. Conserved hypothetical protein, highly similar to U00014|ML014 B1549_C2_207 from Mycobacterium leprae (94 aa), FASTA scores: opt: 573, E(): 2.9e-40, (90.3% identity in 93 aa overlap). Similar to AL096852|SCE19A_16 hypothetical protein from Streptomyces coelicolor (105 aa), FASTA scores: opt: 377, E(): 2.9e-22, (60.0% identity in 105 aa overlap).	UniProt_AC=P67647	Is_Pseudogene=No	conserved hypotheticals		ATP-DEPENDENT CLP PROTEASE ADAPTER PROTEIN CLPS (PTHR33473:SF11)
Rv1374c	0.758585	5.18732	0.000322565	0.00915104		Rv1374c	1547072	1547530	-	Rv1374c	Hypothetical protein	Comments=Rv1374c, (MTCY02B12.08c), len: 152 aa. Hypothetical unknown protein.	UniProt_AC=P71802	Is_Pseudogene=No	conserved hypotheticals
Rv1375	0.638679	4.84547	0.00223979	0.0391464		Rv1375	1547832	1549151	+	Rv1375	Conserved hypothetical protein	Comments=Rv1375, (MTCY02B12.09), len: 439 aa. Conserved hypothetical protein, similar to hypothetical proteins from several organisms e.g. Q52871|U39409 Rhizobium leguminosarum (420 aa), FASTA scores: E(): 2e-30, (34.4% identity in 378 aa overlap). Predicted to be an outer membrane protein (See Song et al., 2008).	UniProt_AC=P71803	Is_Pseudogene=No	conserved hypotheticals		RIBOSOMAL PROTEIN S12 METHYLTHIOTRANSFERASE ACCESSORY FACTOR YCAO (PTHR37809:SF1)
Rv1593c	-1.10773	2.91383	6.3064e-07	4.40885e-05		Rv1593c	1793997	1794707	-	Rv1593c	Conserved protein	Comments=Rv1593c, (MTCY336.11), len: 236 aa. Conserved protein, highly similar to Q49628|B1170_F1_44 from Mycobacterium leprae (286 aa), FASTA scores: opt: 1304, E (): 0, (85.4% identity in 233 aa overlap)	UniProt_AC=O06597	Is_Pseudogene=No	conserved hypotheticals		7,8-DIHYDRO-8-OXOGUANINE TRIPHOSPHATASE (PTHR43758:SF2)		hydrolase(PC00121);phosphorylase(PC00187)
Rv1685c	0.817643	2.60297	0.00237128	0.0408967		Rv1685c	1910776	1911399	-	Rv1685c	Conserved hypothetical protein	Comments=Rv1685c, (MTCI125.07c), len: 207 aa. Conserved hypothetical protein, some similarity to other Mycobacterium tuberculosis hypothetical regulatory proteins e.g. Q10774|Rv1556|YF56_MYCTU (202 aa), FASTA scores: opt: 111, E(): 1.7e-05, (24.1% identity in 195 aa overlap)	UniProt_AC=O33187	Is_Pseudogene=No	conserved hypotheticals
Rv1754c	0.61356	3.81048	0.00225274	0.0391977		Rv1754c	1984979	1986670	-	Rv1754c	Conserved protein	Comments=Rv1754c, (MTCY28.17c), len: 563 aa. Conserved protein, has proline-rich central region. Some similarity in central region to other Mycobacterium tuberculosis proline-rich proteins e.g. O06555|Rv1157c|MTCI65.24c (371 aa), (32.5% identity in 191 aa overlap). Contains PS00017 ATP/GTP-binding site motif A (P-loop). A core mycobacterial gene	UniProt_AC=O06790	Is_Pseudogene=No	conserved hypotheticals
Rv1810	0.752134	4.91506	0.000265529	0.00781612		Rv1810	2052933	2053289	+	Rv1810	Conserved protein	Comments=Rv1810, (MTCY16F9.04c), len: 118 aa. Conserved protein, similar to several hypothetical Mycobacterium tuberculosis proteins that may be exported (possible N-termil sigl sequence) e.g. O53953|Rv1804c|MTV049.26c|AL022021 (108 aa), FASTA scores: opt: 361, E(): 9.6e-17, (53.5% identity in 101 aa overlap)	UniProt_AC=O07222	Is_Pseudogene=No	conserved hypotheticals
Rv1868	-0.648768	4.54329	0.00169593	0.0328691		Rv1868	2117347	2119446	+	Rv1868	Conserved hypothetical protein	Comments=Rv1868, (MTCY359.05c), len: 699 aa. Conserved hypothetical protein, similar to products of three consecutive ORFS in Mycobacterium leprae MLCB2052.18|Z98604|B2052 (257 aa), FASTA scores: opt: 314, E(): 9.9e-12, (35.2% identity in 213 aa overlap)	UniProt_AC=P95147	Is_Pseudogene=No	conserved hypotheticals		SUBFAMILY NOT MED (PTHR43245:SF18)	dehydratase(PC00091);epimerase/racemase(PC00096);oxidoreductase(PC00176)
Rv1907c	0.674364	4.07572	0.000771785	0.0177697		Rv1907c	2153235	2153882	-	Rv1907c	Hypothetical protein	Comments=Rv1907c, (MTCY180.11), len: 215 aa. Hypothetical unknown protein. Similar to Q50763 Ethyl methane sulphote resistance protein from Mycobacterium tuberculosis (168 aa), FASTA scores: opt: 638, E(): 0, (69.7% identity in 152 aa overlap). Downstream of a cloned katG gene (EMBL:mtkatg). Differences are due to frameshift errors in the EMBL sequence and the use of an earlier start codon. Alter…	UniProt_AC=O07725	Is_Pseudogene=No	conserved hypotheticals
Rv1954c	0.968754	4.52656	1.16083e-05	0.000605953		Rv1954c	2201223	2201744	-	Rv1954c	Hypothetical protein	Comments=Rv1954c, (MTCY09F9.10), len: 173 aa. Hypothetical unknown protein, end overlaps next ORF upstream, Rv1955 (MTCY09F9.09c).	UniProt_AC=P95260	Is_Pseudogene=No	conserved hypotheticals
Rv1957	0.76375	3.01988	0.00305714	0.0488518		Rv1957	2202584	2203129	+	Rv1957	Hypothetical protein	Comments=Rv1957, (MTCY09F9.07c), len: 181 aa. Hypothetical unknown protein.	UniProt_AC=P95257	Is_Pseudogene=No	conserved hypotheticals
Rv1958c	1.04702	3.58526	3.43054e-07	2.53407e-05		Rv1958c	2203018	2203632	-	Rv1958c	Hypothetical protein	Comments=Rv1958c, (MTCY09F9.06), len: 204 aa. Hypothetical unknown protein, questioble ORF	UniProt_AC=P95256	Is_Pseudogene=No	conserved hypotheticals
Rv2030c	-2.8963	2.50963	4.35806e-09	4.6113e-07		Rv2030c	2276441	2278486	-	Rv2030c	Conserved protein	Comments=Rv2030c, (MTV018.17c), len: 681 aa. Conserved protein. Predicted possible vaccine candidate (See Zvi et al., 2008).	UniProt_AC=O53475	Is_Pseudogene=No	conserved hypotheticals		SUBFAMILY NOT MED (PTHR31299:SF0)
Rv2047c	-0.645059	4.74509	0.000661815	0.0162146		Rv2047c	2291962	2294526	-	Rv2047c	Conserved hypothetical protein	Comments=Rv2047c, (MTV018.34c), len: 854 aa. Conserved hypothetical protein, similar to many. Contains IPR016040 D(P)-binding domain at N-terminus.	UniProt_AC=P65684	Is_Pseudogene=No	conserved hypotheticals		SUBFAMILY NOT MED (PTHR43000:SF11)
Rv2172c	-0.858165	5.47336	6.0892e-06	0.000335764		Rv2172c	2433631	2434536	-	Rv2172c	Conserved protein	Comments=Rv2172c, (MTV021.05c), len: 301 aa. Conserved protein, equivalent to Mycobacterium leprae conserved hypothetical protein ML0901 (304 aa). FASTA scores: opt: 1656, E(): 7.7e-98	UniProt_AC=O53506	Is_Pseudogene=No	conserved hypotheticals
Rv2406c	-0.605851	4.6021	0.00126244	0.0261505		Rv2406c	2704009	2704437	-	Rv2406c	Conserved protein	Comments=Rv2406c, (MTCY253.14), len: 142 aa. Conserved protein. C-termil region is identical with many CBS domain protein e.g. AAK46774|MT2478 CBS domain protein from Mycobacterium tuberculosis strain CDC1551 (aa 47-142), FASTA scores: opt: 594, E(): 1.9e-30, (98.97% identity in 97 aa overlap)	UniProt_AC=P71737	Is_Pseudogene=No	conserved hypotheticals		SUBFAMILY NOT MED (PTHR43080:SF2)	dehydrogese(PC00092);reductase(PC00198)
Rv2451	0.874278	2.96134	0.000191414	0.00590069		Rv2451	2752262	2752660	+	Rv2451	Hypothetical proline and serine rich protein	Comments=Rv2451, (MTV008.07), len: 132 aa. Hypothetical unknown pro-, ser-rich protein.	UniProt_AC=O53178	Is_Pseudogene=No	conserved hypotheticals
Rv2452c	2.26395	1.09541	1.81584e-07	1.4218e-05		Rv2452c	2752848	2752994	-	Rv2452c	Hypothetical protein	Comments=Rv2452c, (MTV008.08c), len: 48 aa. Hypothetical unknown protein (see citation below).	UniProt_AC=O53179	Is_Pseudogene=No	conserved hypotheticals
Rv2556c	-0.696295	4.62739	0.000283574	0.00816317		Rv2556c	2876576	2876965	-	Rv2556c	Conserved hypothetical protein	Comments=Rv2556c, (MTCY09C4.12), len: 129 aa. Conserved hypothetical protein, highly similar to others e.g. Q9EWY5|2SCG38.34 conserved hypothetical protein from Streptomyces coelicolor (140 aa), FASTA scores: opt: 488, E(): 8.2e-26, (58.8% identity in 131 aa overlap)	UniProt_AC=P67121	Is_Pseudogene=No	conserved hypotheticals		UPF0047 PROTEIN YJBQ (PTHR30615:SF8)
Rv2629	-0.638638	3.88888	0.00258225	0.0435754		Rv2629	2955767	2956891	+	Rv2629	Conserved protein	Comments=Rv2629, (MTCY01A10.03c), len: 374 aa. Conserved protein, similar to Q9ZC00|SC1E6.22c hypothetical 40.7 KDA protein from Streptomyces coelicolor (373 aa), FASTA scores: opt: 425, E(): 2.5e-18, (30.2% identity in 371 aa overlap). Predicted possible vaccine candidate (See Zvi et al., 2008).	UniProt_AC=O06183	Is_Pseudogene=No	conserved hypotheticals
Rv2632c	0.653384	3.96528	0.00141152	0.0283389		Rv2632c	2958909	2959190	-	Rv2632c	Conserved protein	Comments=Rv2632c, (MTCY441.02c), len: 93 aa. Conserved protein, highly similar to conserved hypothetical proteins from Mycobacterium tuberculosis: P71996|YH38_MYCTU|Rv1738|MT1780|MTCY04C12.23 (94 aa), FASTA scores: opt: 319, E(): 4.2e-15, (53.95% identity in 89 aa overlap)	UniProt_AC=P65033	Is_Pseudogene=No	conserved hypotheticals
Rv2638	1.03071	2.78301	5.42268e-05	0.00221144		Rv2638	2964405	2964851	+	Rv2638	Conserved hypothetical protein	Comments=Rv2638, (MTCY441.08), len: 148 aa. Conserved hypothetical protein, similar in part to Q9WVX8|RSBV_STRCO|bldg|SCH5.12c anti-sigma B factor antagonist from Streptomyces coelicolor (113 aa), FASTA scores: opt: 162, E(): 0.00066, (31.8% identity in 110 aa overlap)	UniProt_AC=P71937	Is_Pseudogene=No	conserved hypotheticals		SUBFAMILY NOT MED (PTHR33495:SF2)
Rv2816c	1.79465	4.43438	9.79288e-19	3.19493e-16		Rv2816c	3123625	3123966	-	Rv2816c	Conserved hypothetical protein	Comments=Rv2816c, (MTCY16B7.27), len: 113 aa. Conserved hypothetical protein, highly similar in part to N-terminus of several proteins e.g. O28403|AF1876 conserved hypothetical protein from Archaeoglobus fulgidus (94 aa), FASTA scores: opt: 137, E(): 0.0022, (47.55% identity in 61 aa overlap)	UniProt_AC=P71637	Is_Pseudogene=No	conserved hypotheticals		SUBFAMILY NOT MED (PTHR34405:SF3)
Rv2817c	1.07921	5.63918	1.27749e-07	1.04063e-05		Rv2817c	3123967	3124983	-	Rv2817c	Conserved hypothetical protein	Comments=Rv2817c, (MTCY16B7.26), len: 338 aa. Conserved hypothetical protein, showing similarity with O30236|AF2435 conserved hypothetical protein from Archaeoglobus fulgidus (322 aa), FASTA scores: opt: 397, E(): 2.4e-19, (28.2% identity in 298 aa overlap)	UniProt_AC=P71636	Is_Pseudogene=No	conserved hypotheticals		SUBFAMILY NOT MED (PTHR34353:SF2)
Rv2819c	0.839799	3.6467	0.000547108	0.0139995		Rv2819c	3126240	3127367	-	Rv2819c	Hypothetical protein	Comments=Rv2819c, (MTCY16B7.23), len: 375 aa. Hypothetical unknown protein (see citations below). This region is a possible MT-complex-specific genomic island (See Becq et al., 2007).	UniProt_AC=P71633	Is_Pseudogene=No	conserved hypotheticals		SUBFAMILY NOT MED (PTHR38007:SF1)
Rv2821c	0.920587	3.3178	1.43139e-05	0.000727777		Rv2821c	3128253	3128963	-	Rv2821c	Conserved hypothetical protein	Comments=Rv2821c, (MTCY16B7.21), len: 236 aa. Conserved hypothetical protein, similar to several hypothetical proteins e.g. Q9X2C9|TM1809 conserved hypothetical protein from Thermotoga maritima (247 aa), FASTA scores: opt: 318, E(): 8.2e-15, (39.45% identity in 213 aa overlap)	UniProt_AC=P71631	Is_Pseudogene=No	conserved hypotheticals		SUBFAMILY NOT MED (PTHR35579:SF3)
Rv2822c	1.21242	1.97825	0.000122793	0.00441039		Rv2822c	3128973	3129347	-	Rv2822c	Hypothetical protein	Comments=Rv2822c, (MTCY16B7.20), len: 124 aa. Hypothetical unknown protein. This region is a possible MT-complex-specific genomic island (See Becq et al., 2007).	UniProt_AC=P71630	Is_Pseudogene=No	conserved hypotheticals
Rv2823c	0.85459	3.81045	4.29122e-05	0.00184617		Rv2823c	3129344	3131773	-	Rv2823c	Conserved protein	Comments=Rv2823c, (MTCY16B7.19), len: 809 aa. Conserved protein, similar in part to others e.g. Q9X2D1|TM1811Thermotoga maritima (717 aa), FASTA scores: opt: 401, E(): 3.6e-18, (27.15% identity in 773 aa overlap)	UniProt_AC=P71629	Is_Pseudogene=No	conserved hypotheticals		SUBFAMILY NOT MED (PTHR36528:SF1)
Rv2825c	-0.739854	2.76935	0.00117812	0.0250586		Rv2825c	3132892	3133539	-	Rv2825c	Conserved hypothetical protein	Comments=Rv2825c, (MTCY16B7.17), len: 215 aa. Conserved hypothetical protein, similar to Q9RY53|DR0097 conserved hypothetical protein from Deinococcus radiodurans (189 aa), FASTA scores: opt: 261, E(): 8e-11, (33.5% identity in 176 aa overlap)	UniProt_AC=P71627	Is_Pseudogene=No	conserved hypotheticals
Rv3127	-1.06086	2.10386	0.000161131	0.005346		Rv3127	3492147	3493181	+	Rv3127	Conserved protein	Comments=Rv3127, (MTCY164.37), len: 344 aa. Conserved protein, highly similar to Mycobacterium tuberculosis protein O53476|Rv2032|MTV018.19 (331 aa), FASTA scores: opt: 1212, E(): 6e-69, (56.7% identity in 321 aa overlap), and also similar to P95195|MTCY03A2.27c (332 aa), FASTA scores: opt: 521, E(): 1.6e-25	UniProt_AC=O05800	Is_Pseudogene=No	conserved hypotheticals		IODOTYROSINE DEIODISE 1 (PTHR23026:SF90)	peroxidase(PC00180)
Rv3228	-1.20658	5.05864	2.77378e-08	2.64862e-06		Rv3228	3604726	3605718	+	Rv3228	Conserved hypothetical protein	Comments=Rv3228, (MTCY20B11.03), len: 330 aa. Conserved hypothetical protein, equivalent to Q9CCI4|ML0791 hypothetical protein from Mycobacterium leprae (327 aa), FASTA scores: opt: 1828, E(): 1e-98, (84.0% identity in 331 aa overlap). Also similar to several hypothetical bacterial proteins e.g. Q9K4A8|SC7E4.08c from Streptomyces coelicolor (337 aa), FASTA scores: opt: 1051, E(): 1e-53, (52.65% i…	UniProt_AC=O05873	Is_Pseudogene=No	conserved hypotheticals		SMALL RIBOSOMAL SUBUNIT BIOGENESIS GTPASE RSGA (PTHR32120:SF9)
Rv3337	-1.01992	3.92021	7.5688e-08	6.73451e-06		Rv3337	3723656	3724042	+	Rv3337	Conserved hypothetical protein	Comments=Rv3337, (MTV016.37), len: 128 aa. Conserved hypothetical protein, equivalent to N-terminus of Q49926|ML0685 TPEA (putative hydrolase) from Mycobacterium leprae (303 aa), FASTA scores: opt: 362, E(): 5.7e-17, (74.3% identity in 70 aa overlap). Also weak similarity in N-terminus to Q98JT7|BAB49078|MLR1789 probable epoxide hydrolase from Rhizobium loti (Mesorhizobium loti) (300 aa), FASTA s…	UniProt_AC=O53387	Is_Pseudogene=No	conserved hypotheticals
Rv3639c	1.81451	0.197802	0.00244165	0.0419258		Rv3639c	4077884	4078450	-	Rv3639c	Conserved hypothetical protein	Comments=Rv3639c, (MTCY15C10.13), len: 188 aa. Hypothetical protein, with C-terminus highly similar to N-terminus of P95044|Rv0698|MTCY210.15 hypothetical 22.3 KDA protein from Mycobacterium tuberculosis (203 aa), FASTA scores: opt: 224, E(): 4.5e-07, (54.8% identity in 73 aa overlap).	UniProt_AC=O06368	Is_Pseudogene=No	conserved hypotheticals
Rv3678A	-0.846896	3.15803	0.000107136	0.00388369		Rv3678A	4118530	4118691	-	Rv3678A	Conserved hypothetical protein	Comments=Rv3678A, len: 53 aa. Conserved hypothetical protein, similar to SCH17.10|AL079353_10 conserved hypothetical protein from Streptomyces coelicolor (53 aa), FASTA scores: opt: 259, E(): 1.5e-13, (78.0% identity in 50 aa overlap).	UniProt_AC=Q8VIV6	Is_Pseudogene=No	conserved hypotheticals
Rv3717	0.632704	4.05251	0.00109737	0.0236055		Rv3717	4161048	4161773	+	Rv3717	Conserved hypothetical protein	Comments=Rv3717, (MTV025.065), len: 241 aa. Conserved hypothetical protein, equivalent to O69518|MLCB2407.19c (alias Q9CB75|ML2331 256 aa) hypothetical 25.1 KDA protein from Mycobacterium leprae (244 aa), FASTA scores: opt: 1325, E(): 5.7e-74, (81.95% identity in 244 aa overlap). Also similar to Q9KXK7|SCC53.04 putative secreted protein from Streptomyces coelicolor (336 aa), FASTA scores: opt: 53…	UniProt_AC=O69684	Is_Pseudogene=No	conserved hypotheticals		SUBFAMILY NOT MED (PTHR30404:SF0)	hydrolase(PC00121)
Rv0709	-0.629107	6.07088	0.00208498	0.0373752		Rv0709	805526	805759	+	rpmC	50S ribosomal protein L29 RpmC	Comments=Rv0709, (MTCY210.28), len: 77 aa. rpmC, 50S ribosomal protein L29, equivalent to O06050|RL29_MYCBO|MBS10OPER_10 50S ribosomal protein L29 from Mycobacterium bovis BCG (75 aa)	UniProt_AC=P95057	Is_Pseudogene=No	information pathways
Rv0710	-0.922257	6.83864	3.35833e-06	0.000193351		Rv0710	805756	806166	+	rpsQ	30S ribosomal protein S17 RpsQ	Comments=Rv0710, (MTCY210.29), len: 136 aa. rpsQ, 30S ribosomal protein S17, equivalent to O06051|RS17_MYCBO 30S|MBS10OPER_11 30S ribosomal protein S17 from Mycobacterium bovis BCG (136 aa)	UniProt_AC=P95058	Is_Pseudogene=No	information pathways
Rv0938	-0.737226	5.08218	5.66198e-05	0.0022619		Rv0938	1046136	1048415	+	ligD	ATP dependent DNA ligase LigD (ATP dependent polydeoxyribonucleotide synthase) (thermostable DNA ligase) (ATP dependent polynucleotide ligase) (sealase) (DNA repair enzyme) (DNA joinase)	Comments=Rv0938, (MTCY08D9.01c, MTCY10D7.36c), len: 759 aa. ligD, ATP-dependent DNA ligase, with its C-terminus similar to N-terminal parts of many ATP-dependent DNA ligases e.g. NP_250828.1|NC_002516 probable ATP-dependent DNA ligase from Pseudomonas aeruginosa (840 aa)	UniProt_AC=P71571	Is_Pseudogene=No	information pathways
Rv1316c	-0.714508	4.38764	0.000188639	0.00586128		Rv1316c	1477134	1477631	-	ogt	Methylated-DNA--protein-cysteine methyltransferase Ogt (6-O-methylguanine-DNA methyltransferase) (O-6-methylguanine-DNA-alkyltransferase)	Comments=Rv1316c, (MTCY130.01c), len: 165 aa. Ogt, methylated-dna--protein-cysteine methytransferase (see citation below), similar to many e.g. OGT_HAEIN|P44687 Haemophilus influenzae (190 aa), FASTA scores: opt: 405, E(): 6.5e-20, (41.9% identity in 155 aa overlap). Contains PS00374 Methylated-DNA--protein-cysteine methyltransferase active site.	UniProt_AC=P0A696	Is_Pseudogene=No	information pathways
Rv2444c	-0.622414	7.84827	0.00139664	0.0283307		Rv2444c	2742123	2744984	-	rne	Possible ribonuclease E Rne	Comments=Rv2444c, (MTCY428.02), len: 953 aa. Possible rne, ribonuclease E, highly similar to others e.g. Q9CBZ1|ML1468 possible ribonuclease from Mycobacterium leprae (924 aa), FASTA scores: opt: 3713, E(): 2.4e-174, (74.2% identity in 966 aa overlap)	UniProt_AC=P71905	Is_Pseudogene=No	information pathways
Rv2976c	0.720912	4.42857	0.000149505	0.0050869		Rv2976c	3332071	3332754	-	ung	Probable uracil-DNA glycosylase Ung (UDG)	Comments=Rv2976c, (MTCY349.11), len: 227 aa. Probable ung, uracil-DNA glycosylase (see citation below), equivalent to Q9CBS3 uracil-DNA glycosylase from Mycobacterium leprae (227 aa), FASTA scores: opt: 1394, E(): 8.8e-85, (88.1% identity in 227 aa overlap). Also highly similar to others e.g. Q9EX12 from Streptomyces coelicolor (225 aa), FASTA scores: opt: 1134, E(): 1.3e-67, (72.75% identity in …	UniProt_AC=P67071	Is_Pseudogene=No	information pathways
Rv3048c	-0.719684	5.22059	9.82029e-05	0.00366157		Rv3048c	3408404	3409378	-	nrdF2	Ribonucleoside-diphosphate reductase (beta chain) NrdF2 (ribonucleotide reductase small subunit) (R2F protein)	Comments=Rv3048c, (MTV012.63c), len: 324 aa. NrdF2, ribonucleoside-diphosphate reductase, beta chain (see citation below), equivalent to Q9CBQ2|RIR2_MYCL|NRDF|ML1731 ribonucleoside-diphosphate reductase beta chain from Mycobacterium leprae (325 aa), FASTA scores: opt: 2009, E(): 1.3e-123, (93.5% identity in 324 aa overlap). Also similar to other ribonucleoside-diphosphate reductases e.g. Q9XD62|N…	UniProt_AC=Q50549	Is_Pseudogene=No	information pathways
Rv3370c	0.695598	3.31802	0.00103013	0.0227852		Rv3370c	3781501	3784740	-	dnaE2	Probable DNA polymerase III (alpha chain) DnaE2 (DNA nucleotidyltransferase)	Comments=Rv3370c, (MTV004.28c), len: 1079 aa. Probable dnaE2, DNA polymerase III, alpha chain (see citations below), similar to many e.g. BAB51086|MLR4428 from Rhizobium loti (Mesorhizobium loti) (1118 aa), FASTA scores: opt: 1103, E(): 8.9e-59, (37.65% identity in 1075 aa overlap)	UniProt_AC=O50399	Is_Pseudogene=No	information pathways
Rv1047	-1.29025	5.55955	1.00623e-09	1.23106e-07		Rv1047	1169423	1170670	+	Rv1047	Probable transposase	Comments=Rv1047, (MTCY10G2.02c), len: 415 aa. IS1081 transposase, most similar to TRA1_MYCBO|P35882 transposase for insertion sequence element (415 aa), FASTA scores: opt: 2675, E(): 0, (99.8% identity in 415 aa overlap). Contains PS01007 Transposases, Mutator family, signature. This region is a possible MT-complex-specific genomic island (See Becq et al., 2007).	UniProt_AC=P96354	Is_Pseudogene=No	insertion seqs and phages
Rv1199c	-1.39846	5.71502	7.14851e-11	1.0764e-08		Rv1199c	1341358	1342605	-	Rv1199c	Possible transposase	Comments=Rv1199c, (MTCI364.11c), len: 415 aa. Possible transposase for IS1081, identical to TRA1_MYCBO|P35882 transposase for insertion sequence element (415 aa)	UniProt_AC=P60230	Is_Pseudogene=No	insertion seqs and phages
Rv2512c	-1.38629	5.69591	1.22882e-10	1.78178e-08		Rv2512c	2828556	2829803	-	Rv2512c	Transposase for insertion sequence element IS1081	Comments=Rv2512c, (MTCY07A7.18c), len: 415 aa. Transposase for IS1081, identical to P35882|TRA1_MYCBO transposase for insertion sequence element IS1081 from Mycobacterium bovis (415 aa), FASTA scores: opt: 2680, E(): 1.9e-162, (100.0% identity in 415 aa overlap). Also highly similar to others from Mycobacterium tuberculosis e.g. P96354|Rv1047|MTCY10G2.02c|Rv3115|MTCY164.25|Rv3023c|MTV012.38c (415…	UniProt_AC=P60230	Is_Pseudogene=No	insertion seqs and phages
Rv3023c	-1.3654	5.61242	1.43562e-09	1.65307e-07		Rv3023c	3381375	3382622	-	Rv3023c	Probable transposase	Comments=Rv3023c, (MTV012.38c), len: 415 aa. Probable IS1081 transposase. Contains PS01007 Transposases, Mutator family, signature. Similars to P35882|TRA1_MYCTU|Rv1199c|MTCI364.11c and Rv2512c|MTCY07A7.18c transposases for insertion sequence element IS1081 (415 aa), FASTA scores: opt: 2675, E(): 1.8e-162, (100.0% identity in 415 aa overlap). Belongs to the mutator family of transposase.	UniProt_AC=P96354	Is_Pseudogene=No	insertion seqs and phages
Rv3115	-1.38007	5.55796	4.94335e-10	6.45107e-08		Rv3115	3481451	3482698	+	Rv3115	Probable transposase	Comments=Rv3115, (MTCY164.25), len: 415 aa. Probable IS1081 transposase, similar to others. Has transposases, mutator family, signature (PS01007). Other copies are MTCY10G2.02c, MTCY441.35, MTCY77.03c. This region is a possible MT-complex-specific genomic island (See Becq et al., 2007).	UniProt_AC=P96354	Is_Pseudogene=No	insertion seqs and phages
Rv0062	0.694516	2.93708	0.00255599	0.0433191		Rv0062	65552	66694	+	celA1	Possible cellulase CelA1 (endoglucanase) (endo-1,4-beta-glucanase) (FI-cmcase) (carboxymethyl cellulase)	Comments=Rv0062, (MTV030.05), len: 380 aa. Possible celA1, cellulase, similar to many. Seems to belong to cellulase family B (family 6 of glycosyl hydrolases). Note that previously known as celA.	UniProt_AC=Q79G13	Is_Pseudogene=No	intermediary metabolism and respiration
Rv0077c	1.09692	1.84369	0.0020616	0.0373752		Rv0077c	85636	86466	-	Rv0077c	Probable oxidoreductase	Comments=Rv0077c, (MTV030.21c), len: 276 aa. Possible oxidoreductase, weakly similar to others from Streptomyces. Also similar to MTCY05A6_35 and MTCY1A11_10 from Mycobacterium tuberculosis. And shows some similarity in part with AAL17935.1|AY054120 putative epoxide hydrolase from Mycobacterium smegmatis (203 aa).	UniProt_AC=O53622	Is_Pseudogene=No	intermediary metabolism and respiration
Rv0082	-1.55693	1.53277	1.28257e-06	7.97027e-05		Rv0082	89924	90403	+	Rv0082	Probable oxidoreductase	Comments=Rv0082, (MTV030.26), len: 159 aa. Probable oxidoreductase, highly similar or similar to other various oxidoreductases. Nucleotide position 90144 in the genome sequence has been corrected, A:G resulting in Q74R.	UniProt_AC=O53627	Is_Pseudogene=No	intermediary metabolism and respiration
Rv0083	-1.31163	2.44709	9.21649e-08	8.01834e-06		Rv0083	90400	92322	+	Rv0083	Probable oxidoreductase	Comments=Rv0083, (MTV030.27, MTCY251.01), len: 640 aa. Probable oxidoreductase, showing some similarity to other various oxidoreductases. Nucleotide position 91071 in the genome sequence has been corrected, T:C resulting in I224I.	UniProt_AC=Q10880	Is_Pseudogene=No	intermediary metabolism and respiration
Rv0086	-0.712407	2.89358	0.00124294	0.0261059		Rv0086	93951	95417	+	hycQ	Possible hydrogenase HycQ	Comments=Rv0086, (MTCY251.04), len: 488 aa. Possible hycQ, hydrogenase, integral membrane protein. Belongs to the NADH-Ubiquinone/plastoquinone (complex I) superfamily.	UniProt_AC=Q10883	Is_Pseudogene=No	intermediary metabolism and respiration
Rv0197	-1.78758	6.48284	3.79241e-17	9.46761e-15		Rv0197	232231	234519	+	Rv0197	Possible oxidoreductase	Comments=Rv0197, (MTV033.05), len: 762 aa. Possible oxidoreductase, similar to others e.g. 9948789|AAG06102.1|AE004699_7|B83307 probable molybdopterin oxidoreductase from Pseudomonas aeruginosa strain PAO1 (769 aa)	UniProt_AC=O53648	Is_Pseudogene=No	intermediary metabolism and respiration
Rv0241c	-0.753921	5.20044	4.28605e-05	0.00184617		Rv0241c	289812	290654	-	htdX	Probable 3-hydroxyacyl-thioester dehydratase HtdX	Comments=Rv0241c, (MTV034.07c), len: 280 aa. Probable htdX, 3-hydroxyacyl-thioester dehydratase (See Gurvitz et al., 2009), highly similar to MLCB1883.17c|T44876063881|CAA18566.1|AL022486 hypothetical protein from Mycobacterium leprae (280 aa), FASTA scores: opt: 1564, E(): 0, (81.8% identity in 280 aa overlap)	UniProt_AC=O53664	Is_Pseudogene=No	intermediary metabolism and respiration
Rv0315	0.592809	5.73098	0.00218568	0.0383719		Rv0315	383602	384486	+	Rv0315	Possible beta-1,3-glucanase precursor	Comments=Rv0315, (MTCY63.20), len: 294 aa. Possible beta-1,3-glucanase precursor (has hydrophobic stretch in its N-terminal part), similar to others e.g. Q51333|AAC44371.1 beta-1,3-glucanase II a from Oerskovia xanthineolytica (306 aa), FASTA scores: opt: 76, E(): 3e-14, (34.1% identity in 302 aa overlap)	UniProt_AC=O07242	Is_Pseudogene=No	intermediary metabolism and respiration
Rv0467	1.31823	4.95151	1.96626e-09	2.19941e-07		Rv0467	557527	558813	+	icl1	Isocitrate lyase Icl (isocitrase) (isocitratase)	Comments=Rv0467, (MTV038.11), len: 428 aa. Icl1, isocitrate lyase (see citations below), highly similar to many, closest to Z29367|RFISCILY_1 from R. fascians (429 aa), FASTA scores: opt: 2359, E(): 0, (80.7% identity in 429 aa overlap). Belongs to the isocitrate lyase family. Has 2-methyl-isocitrate lyase (MCL) activity in M. tuberculosis Erdman (See Munoz-Elias et al., 2006	UniProt_AC=P0A5H3	Is_Pseudogene=No	intermediary metabolism and respiration
Rv0693	0.682186	6.5766	0.00108838	0.0235416		Rv0693	792157	793332	+	pqqE	Probable coenzyme PQQ synthesis protein E PqqE (coenzyme PQQ synthesis protein III)	Comments=Rv0693, (MTCY210.10), len: 391 aa. Probable pqqE (alternate gene name: pqqIII), coenzyme PQQ synthesis protein E, similar to others AE001109_9|O30258|PQQE coenzyme PQQ synthesis protein from Archaeoglobus fulgidus (375 aa), FASTA scores: E(): 1.6e-16, (28.1% identity in 377 aa overlap)	UniProt_AC=P95039	Is_Pseudogene=No	intermediary metabolism and respiration
Rv0814c	0.648461	4.58099	0.000709664	0.0168839		Rv0814c	908181	908483	-	sseC2	Conserved protein SseC2	Comments=Rv0814c, (MTV043.06c, O05794), len: 100 aa. SseC2, conserved protein, highly similar to AAA62972.1|U15182|MLU15182_17 hypothetical protein from Mycobacterium leprae (143 aa), FASTA scores: opt: 545, E(): 0, (84.0% identity in 100 aa overlap)	UniProt_AC=P0CG95	Is_Pseudogene=No	intermediary metabolism and respiration
Rv1095	-0.823376	6.75313	2.23264e-05	0.00106595		Rv1095	1222997	1224298	+	phoH2	Probable PHOH-like protein PhoH2 (phosphate starvation-inducible protein PSIH)	Comments=Rv1095, (MTV017.48), len: 433 aa. Probable phoH2, phoH-like protein (phosphate starvation-induced protein), probably ATP-binding protein. Equivalent to AL049491 MLCB1222_14 Mycobacterium leprae (433 aa) (92.8% identity in 432 aa overlap). Similar to many proteins described as PhoH-like e.g. Z97025|BSZ97025_12 Bacillus subtilis (442 aa), FASTA scores: opt: 605, E(): 0, (40.1% identity in …	UniProt_AC=O53443	Is_Pseudogene=No	intermediary metabolism and respiration
Rv1121	-0.798209	5.10032	1.64821e-05	0.0008168		Rv1121	1243707	1245107	+	zwf1	Probable glucose-6-phosphate 1-dehydrogenase Zwf1 (G6PD)	Comments=Rv1121, (MTCY22G8.10), len: 466 aa. Probable zwf1, glucose-6-phosphate 1-dehydrogenase, highly similar to many e.g. G6PD_E COLI|P22992 Escherichia coli (491 aa), FASTA scores: opt: 642, E(): 0, (35.8% identity in 478 aa overlap). Mycobacterium tuberculosis has two genes for ZWF, this one is highly divergent. Belongs to the glucose-6-phosphate dehydrogenase family. Note that previously kn…	UniProt_AC=P0A586	Is_Pseudogene=No	intermediary metabolism and respiration
Rv1130	1.33614	4.1941	2.71637e-05	0.00128128		Rv1130	1254555	1256135	+	prpD	Possible methylcitrate dehydratase PrpD	Comments=Rv1130, (MTCY22G8.19), len: 526 aa. Possible prpD, methylcitrate dehydratase (MCD), some similarity to AP000063|AP000063_192 hypothetical protein from Aeropyrum pernix (479 aa), FASTA scores: opt: 717, E(): 0, (34.3% identity in 443 a a overlap), and to PRPD_ECOLI|P77243 prpd protein from Escherichia coli (483aa), FASTA scores: opt: 234, E(): 3.3e-08, (27.0% identity in 429 aa overlap). …	UniProt_AC=O06582	Is_Pseudogene=No	intermediary metabolism and respiration
Rv1131	1.10989	4.23341	0.000139982	0.0048498		Rv1131	1256132	1257313	+	prpC	Probable methylcitrate synthase PrpC	Comments=Rv1131, (MTCY22G8.20), len: 393 aa. Probable prpC, methylcitrate synthase (MCS) (previously known as gltA1) , highly similar to CISY_MYCSM|P26491 citrate synthase from Mycobacterium smegmatis (375 aa), FASTA scores: opt:1942, E(): 0, (80.0% identity in 375 aa overlap). Also similar to two other M. tuberculosis citrate synthases, Rv0896c|MTCY31.24|gltA2 (431 aa), FASTA score: (33.1% ident…	UniProt_AC=O08395	Is_Pseudogene=No	intermediary metabolism and respiration
Rv1155	-0.629628	4.07996	0.000731698	0.0170512		Rv1155	1281429	1281872	+	Rv1155	Possible pyridoxamine 5'-phosphate oxidase (PNP/PMP oxidase) (pyridoxinephosphate oxidase) (PNPOX) (pyridoxine 5'-phosphate oxidase)	Comments=Rv1155, (MTCI65.22), len: 147 aa. Possible pyridoxine 5'-phosphate oxidase (PNPOx) (See Biswal et al., 2005	UniProt_AC=O06553	Is_Pseudogene=No	intermediary metabolism and respiration
Rv1177	-0.962746	5.71771	3.27764e-06	0.000191522		Rv1177	1309005	1309331	+	fdxC	Probable ferredoxin FdxC	Comments=Rv1177, (MTV005.13), len: 108 aa. Probable fdxC, ferredoxin, equivalent to NP_302047.1|NC_002677 ferredoxin from Mycobacterium leprae (108 aa)	UniProt_AC=O50433	Is_Pseudogene=No	intermediary metabolism and respiration
Rv1178	-0.965799	6.33483	4.8438e-07	3.51176e-05		Rv1178	1309364	1310452	+	Rv1178	Probable aminotransferase	Comments=Rv1178, (MTV005.14), len: 362 aa. Probable aminotransferase, weak similarity to many aspartate aminotransferases e.g. Q55679|D64000 SLL0006 aspartate aminotransferase from Synechocystis sp. (394 aa), FASTA scores: opt: 218, E(): 1.3e-25, (32.5% identity in 379 aa overlap). Contains PS00105 Aminotransferases class-I pyridoxal-phosphate attachment site. Also similar to Mycobacterium tuberc…	UniProt_AC=O50434	Is_Pseudogene=No	intermediary metabolism and respiration
Rv1256c	0.7556	3.41377	0.000662665	0.0162146		Rv1256c	1403386	1404603	-	cyp130	Probable cytochrome P450 130 Cyp130	Comments=Rv1256c, (MT1295, MTCY50.26), len: 405 aa. Probable cyp130, cytochrome P450, similar to other cytochromes P-450 e.g. S51594 cytochrome P450 mycG from Micromonospora griseorubida (397 aa)	UniProt_AC=Q11062	Is_Pseudogene=No	intermediary metabolism and respiration
Rv1360	-0.689227	5.14346	0.00040904	0.0111091		Rv1360	1531348	1532370	+	Rv1360	Probable oxidoreductase	Comments=Rv1360, (MTCY02B10.24), len: 340 aa. Probable oxidoreductase. Similar to Q49598|G1002714 coenzyme F420-dependent n5, n10-methylenetetrahydromethanopterin reductase from Methanopyrus kandleri (349 aa), FASTA scores: opt: 264, E(): 4.4e-11, (26.3% identity in 323 aa overlap).	UniProt_AC=P64831	Is_Pseudogene=No	intermediary metabolism and respiration
Rv1552	-0.915338	1.72632	0.00216537	0.0381867		Rv1552	1757681	1759432	+	frdA	Probable fumarate reductase [flavoprotein subunit] FrdA (fumarate dehydrogenase) (fumaric hydrogenase)	Comments=Rv1552, (MTCY48.13c), len: 583 aa. Probable frdA, fumarate reductase, flavoprotein subunit, highly similar to others e.g. P00363|FRDA_ECOLI fumarate reductase flavoprotein subunit from Escherichia coli strain K12 (601 aa), FASTA scores: opt: 2102, E(): 0, (54.7% identity in 585 aa overlap)	UniProt_AC=P64174	Is_Pseudogene=No	intermediary metabolism and respiration
Rv1594	-1.22253	6.66952	5.80221e-10	7.32763e-08		Rv1594	1794756	1795805	+	nadA	Probable quinolinate synthetase NadA	Comments=Rv1594, (MTCY336.10c), len: 349 aa. Probable nadA, quinolinate synthetase. Similar to many e.g. Q49622 NADA from Mycobacterium leprae (368 aa), FASTA results: opt: 1994, E(): 0, (84.4% identity in 352 aa overlap).	UniProt_AC=P65497	Is_Pseudogene=No	intermediary metabolism and respiration
Rv1595	-1.04001	6.83897	9.98415e-08	8.31659e-06		Rv1595	1795805	1797388	+	nadB	Probable L-aspartate oxidase NadB	Comments=Rv1595, (MTCY336.09c), len: 527 aa. Probable nadB, L-aspartate oxidase. Similar to many e.g. Q49617 L-aspartate oxidase (quinolinate synthetase) from Mycobacterium leprae (424 aa), FASTA results: opt: 2152, E(): 0, (82.0% identity in 400 aa overlap). Also shows some similarity to Rv1552 frdA from Mycobacterium tuberculosis (583 aa), FASTA results: E(): 1e-10, (35.3% identity in 566 aa ov…	UniProt_AC=P65499	Is_Pseudogene=No	intermediary metabolism and respiration
Rv1596	-1.20583	6.58133	4.67563e-10	6.3121e-08		Rv1596	1797388	1798245	+	nadC	Probable nicotinate-nucleotide pyrophosphatase NadC	Comments=Rv1596, (MTCY336.08c), len: 285 aa. Probable nadC, nicotinate-nucleotide pyrophosphatase O06594. Similar to many e.g. ADC_MYCLE|P46714 from Mycobacterium leprae (284 aa), FASTA results: opt: 1418, E(): 0,(79.2% identity in 283 aa overlap). Belongs to the NADC/MODD family.	UniProt_AC=O06594	Is_Pseudogene=No	intermediary metabolism and respiration
Rv1869c	-0.801749	6.01161	0.000198735	0.0060785		Rv1869c	2119460	2120695	-	Rv1869c	Probable reductase	Comments=Rv1869c, (MTCY359.04), len: 411 aa. Probable reductase (1.-.-.-). Similar to several reductases e.g. CAC04223.1|AL391515 putative ferredoxin reductase from Streptomyces coelicolor (420 aa)	UniProt_AC=P95146	Is_Pseudogene=No	intermediary metabolism and respiration
Rv1885c	0.6682	4.51083	0.000642901	0.0160179		Rv1885c	2134273	2134872	-	Rv1885c	Chorismate mutase	Comments=Rv1885c, (MTCY180.33), len: 199 aa. Chorismate mutase, AroQ class (See Prakash et al., 2005, Sasso et al., 2005), some similarity to P42517|CHMU_ERWHE monofunctional chorismate mutase (181 aa), FASTA score: opt: 181, E(): 0.00017, (28.6% identity in 133 aa overlap). Contains N-terminal signal sequence.	UniProt_AC=O07746	Is_Pseudogene=No	intermediary metabolism and respiration
Rv2029c	-1.84203	0.945851	0.000168705	0.00547757		Rv2029c	2275405	2276424	-	pfkB	6-phosphofructokinase PfkB (phosphohexokinase) (phosphofructokinase)	Comments=Rv2029c, (MTV018.16c), len: 339 aa. PfkB, phosphofructokinase. Contains PS00583 pfkB family of carbohydrate kinases signature 1. Predicted possible vaccine candidate (See Zvi et al., 2008).	UniProt_AC=O86352	Is_Pseudogene=No	intermediary metabolism and respiration
Rv2111c	-0.819441	4.23953	5.97518e-05	0.00236291		Rv2111c	2370598	2370792	-	pup	Prokaryotic ubiquitin-like protein Pup	Comments=Rv2111c, MTCY261.07c, len: 64 aa. Pup, prokaryotic ubiquitin-like protein (See Pearce et al., 2008). Highly similar to many. Pup|Rv2111c and Mpa|Rv2115c interact (See Pearce et al., 2008).	UniProt_AC=O33246	Is_Pseudogene=No	intermediary metabolism and respiration
Rv2251	0.91122	3.07316	0.00017997	0.00568535		Rv2251	2525565	2526992	+	Rv2251	Possible flavoprotein	Comments=Rv2251, (MTV022.01), len: 475 aa. Possible flavoprotein, probably continuation of Rv2250A, similar to MTCY164.18 from Mycobacterium tuberculosis and to several alkyldihydroxyacetonephosphate synthases (e.g. O00116). Also some similarity to D-lactate dehydrogenases. FASTA scores: sptr|O05784|O05784 hypothetical 56.5 kDa protein. (527 aa) opt: 1019 E(): 0	UniProt_AC=O53525	Is_Pseudogene=No	intermediary metabolism and respiration
Rv2259	-0.585762	4.28712	0.00201252	0.0368179		Rv2259	2532245	2533330	+	mscR	S-nitrosomycothiol reductase MscR	Comments=Rv2259, (MTV022.09), len: 361 aa. MscR, S-nitrosomycothiol reductase (see Vogt et al., 2003), similar to several zinc-containing alcohol dehydrogenases especially from Amycolatopsis methanolica P80094 (360 aa), FASTA scores: sp|P80094|FADH_AMYME NAD/mycothiol-dependent formaldehyde dehydrogenase (MD-FALDH) Length = 360, Expect = e-156, Identities = 268/358 (74%). Also similar to Rv0162c,…	UniProt_AC=O53533	Is_Pseudogene=No	intermediary metabolism and respiration
Rv2351c	0.669116	3.54627	0.00140968	0.0283389		Rv2351c	2630537	2632075	-	plcA	Membrane-associated phospholipase C 1 PlcA (MTP40 antigen)	Comments=Rv2351c, (MTP40, MT2416, MTCY98.20c), len: 512 aa. plcA (alternate gene name: mpcA), membrane-associated phospolipase C 1 (MTP40 antigen) (see citations below), similar to other precursors of several phospolipases C e.g. P15713|PHLN_PSEAE|PA3319 non-hemolytic phospholipase C precursor from Pseudomonas aeruginosa (692 aa), FASTA scores: opt: 1064, E(): 4.3e-55, (39.85% identity in 517 aa …	UniProt_AC=Q04001	Is_Pseudogene=No	intermediary metabolism and respiration
Rv2391	-0.676044	7.83207	0.000644044	0.0160179		Rv2391	2684679	2686370	+	sirA	Ferredoxin-dependent sulfite reductase SirA	Comments=Rv2391, (MTCY253.30c), len: 563 aa. SirA, ferredoxin-dependent sulfite reductase (See Schnell et al., 2005). Previously annotated as nirA. Similar to e.g. CAC33947|SCBAC1A6.26c Putative nitrite/sulphite reductase from Streptomyces coelicolor (565 aa), FASTA scores: opt: 2335, E(): 1.2e-137, (60.1% identity in 567 aa overlap)	UniProt_AC=P71753	Is_Pseudogene=No	intermediary metabolism and respiration
Rv2392	-0.727122	6.16742	0.000180072	0.00568535		Rv2392	2686367	2687131	+	cysH	Probable 3'-phosphoadenosine 5'-phosphosulfate reductase CysH (PAPS reductase, thioredoxin DEP.) (padops reductase) (3'- phosphoadenylylsulfate reductase) (PAPS sulfotransferase)	Comments=Rv2392, (MTCY253.29c), len: 254 aa. Probable cysH, 3'-phosphoadenosine 5'-phosphosulfate reductase (see citation below), similar to many e.g. P94498|O34620|CYH1_BACSU|CYSH from Bacillus subtilis (233 aa), FASTA scores: opt: 618, E(): 8.1e-32, (46.5% identity in 202 aa overlap)	UniProt_AC=P65668	Is_Pseudogene=No	intermediary metabolism and respiration
Rv2393	-0.664703	5.93445	0.00118412	0.0250586		Rv2393	2687128	2687973	+	che1	Ferrochelatase Che1	Comments=Rv2393, (MTCY253.28c), len: 281 aa. Che1, ferrochelatase (See Pinto et al., 2007). Conserved protein, with some similarity to Q9L2E8|SC7A8.10c putative secreted protein from Streptomyces coelicolor (274 aa), FASTA scores: opt: 407, E(): 2.8e-18, (37% identity in 246 aa overlap)	UniProt_AC=P71751	Is_Pseudogene=No	intermediary metabolism and respiration
Rv2453c	0.731741	3.8417	0.000386113	0.0107974		Rv2453c	2753018	2753623	-	mobA	Probable molybdopterin-guanine dinucleotide biosynthesis protein A MobA	Comments=Rv2453c, (MT2528, MTV008.09c), len: 201 aa. Probable mobA, molybdopterin-guanine dinucleotide biosynthesis protein A, similar to others e.g. Q9F8G7 from Carboxydothermus hydrogenoformans (224 aa), FASTA scores: opt: 249, E(): 3.9e-08, (30.6% identity in 173 aa overlap)	UniProt_AC=P65402	Is_Pseudogene=No	intermediary metabolism and respiration
Rv2454c	0.590816	5.73966	0.00307667	0.0489641		Rv2454c	2753625	2754746	-	Rv2454c	Probable oxidoreductase (beta subunit)	Comments=Rv2454c, (MTV008.10c), len: 373 aa. Probable oxidoreductase, beta subunit, similar to Q9F2W7|SCD20.12c putative oxidoreductase from Streptomyces coelicolor (352 aa), FASTA scores: opt: 1461, E(): 6.4e-85, (65.3% identity in 343 aa overlap) alias Q9RKS5|STAH10.34c putative oxidoreductase beta-subunit from Streptomyces coelicolor (350 aa), FASTA scores: opt: 1429, E(): 6.7e-83, (64.0% iden…	UniProt_AC=O53181	Is_Pseudogene=No	intermediary metabolism and respiration
Rv2552c	-0.618134	4.00183	0.00268601	0.0447478		Rv2552c	2871206	2872015	-	aroE	Probable shikimate 5-dehydrogenase AroE (5-dehydroshikimate reductase)	Comments=Rv2552c, (MTCY159.04), len: 269 aa. Probable aroE, shikimate 5-dehydrogenase, equivalent to Q9CCS7|AROE|ML0515 putative shikimate 5-dehydrogenase from Mycobacterium leprae (278 aa), FASTA scores: opt: 1452, E(): 1.8e-77, (81.5% identity in 270 aa overlap). Also highly similar, but longer 101 aa, to Q9KH59|AROE putative shikimate dehydrogenase (fragment) from Mycobacterium marinum (148 aa…	UniProt_AC=P95001	Is_Pseudogene=No	intermediary metabolism and respiration
Rv2913c	0.755488	3.23655	0.000928918	0.0207812		Rv2913c	3219863	3221698	-	Rv2913c	Possible D-amino acid aminohydrolase (D-amino acid hydrolase)	Comments=Rv2913c, (MTCY338.01c, MTCY274.45c), len: 611 aa. Possible D-amino acid aminohydrolase, similar (principally in N-terminus) to D-amino acid aminohydrolases e.g. Q9V2D3|NDAD|PAB0090 D-aminoacylase (aspartate, glutamate etc) from Pyrococcus abyssi (526 aa), FASTA scores: opt: 336, E(): 2.2e-13, (27.55% identity in 581 aa overlap)	UniProt_AC=P65530	Is_Pseudogene=No	intermediary metabolism and respiration
Rv2918c	-0.701091	4.49675	0.000236332	0.00706288		Rv2918c	3228254	3230680	-	glnD	Probable [protein-PII] uridylyltransferase GlnD (PII uridylyl- transferase) (uridylyl removing enzyme) (UTASE)	Comments=Rv2918c, (MTCY338.07c), len: 808 aa. Probable glnD, uridylyltransferase (ala-rich protein), similar to other uridylyltransferases e.g. O69873||SC2E1.02 from Streptomyces coelicolor (835 aa), FASTA scores: opt: 1473, E(): 2.8e-81, (41.03% identity in 858 aa overlap)	UniProt_AC=Q10961	Is_Pseudogene=No	intermediary metabolism and respiration
Rv2987c	-1.40517	5.20391	4.69858e-13	9.19748e-11		Rv2987c	3344033	3344629	-	leuD	Probable 3-isopropylmalate dehydratase (small subunit) LeuD (isopropylmalate isomerase) (alpha-IPM isomerase) (IPMI)	Comments=Rv2987c, (MTV012.01c), len: 198 aa. Probable leuD, 3-isopropylmalate dehydratase, small subunit, equivalent to O33124|LEUD_MYCLE 3-isopropylmalate dehydratase small subunit from Mycobacterium leprae (198 aa), FASTA scores: opt: 1155, E(): 4.2e-72, (87.75% identity in 196 aa overlap). Also highly similar to many e.g. O86535|LEUD_STRCO from Streptomyces coelicolor (197 aa), FASTA scores: o…	UniProt_AC=P65277	Is_Pseudogene=No	intermediary metabolism and respiration
Rv2988c	-1.12169	6.17819	1.32441e-08	1.32951e-06		Rv2988c	3344654	3346075	-	leuC	Probable 3-isopropylmalate dehydratase (large subunit) LeuC (isopropylmalate isomerase) (alpha-IPM isomerase) (IPMI)	Comments=Rv2988c, (MTV012.02c), len: 473 aa. Probable leuC, 3-isopropylmalate dehydratase, large subunit, equivalent to O33123|LEU2_MYCLE 3-isopropylmalate dehydratase small subunit from Mycobacterium leprae (476 aa), FASTA scores: opt: 2818, E(): 1.3e-171, (88.75% identity in 471 aa overlap). Also highly similar to many e.g. Q44427|LEU2_ACTTI from Actinoplanes teichomyceticus (485 aa), FASTA sco…	UniProt_AC=O53237	Is_Pseudogene=No	intermediary metabolism and respiration
Rv3049c	-0.68614	6.37965	0.000368549	0.0103803		Rv3049c	3409509	3411083	-	Rv3049c	Probable monooxygenase	Comments=Rv3049c, (MTV012.64c), len: 524 aa. Probable monooxygenase, similar to several monooxygenases e.g. Q9I3H5|PA1538 probable flavin-containing monooxygenase from Pseudomonas aeruginosa (527 aa), FASTA scores: opt: 1577, E(): 3.9e-90, (47.3% identity in 501 aa overlap)	UniProt_AC=O53294	Is_Pseudogene=No	intermediary metabolism and respiration
Rv3118	0.789091	4.24135	3.20561e-05	0.00147647		Rv3118	3484809	3485111	+	sseC1	Conserved hypothetical protein SseC1	Comments=Rv3118, (MTCY164.28, O05794), len: 100 aa. SseC1, conserved hypothetical protein, equivalent to Q9CBC7|ML2199 hypothetical protein from Mycobacterium leprae (100 aa), FASTA scores: opt: 545, E(): 3.1e-30, (84.0% identity in 10 aa overlap). Also similar to hypothetical proteins e.g. Q50035 from Saccharopolyspora erythraea (Streptomyces erythraeus) (101 aa), FASTA scores: opt: 345, E(): 9.…	UniProt_AC=P0CG96	Is_Pseudogene=No	intermediary metabolism and respiration
Rv3145	-0.600755	4.75174	0.00151209	0.0299046		Rv3145	3511682	3512068	+	nuoA	Probable NADH dehydrogenase I (chain A) NuoA (NADH-ubiquinone oxidoreductase chain A)	Comments=Rv3145, (MTCY03A2.13c), len: 128 aa. Probable nuoA, integral membrane NADH dehydrogenase, chain A, similar to others e.g. Q9XAQ4|NUOA from Streptomyces coelicolor (119 aa), FASTA scores: opt: 405, E(): 5.4e-20, (68.75% identity in 128 aa overlap)	UniProt_AC=P65563	Is_Pseudogene=No	intermediary metabolism and respiration
Rv3339c	-0.648969	5.03495	0.000710778	0.0168839		Rv3339c	3724615	3725844	-	icd1	Probable isocitrate dehydrogenase [NADP] Icd1 (oxalosuccinate decarboxylase) (IDH) (NADP+-specific ICDH) (IDP)	Comments=Rv3339c, (MTV016.39c), len: 409 aa. Probable icd1, isocitrate dehydrogenase NADP-dependent, highly similar to many e.g. Q9A5C8|CC2522 from Caulobacter crescentus (403 aa), FASTA scores: opt: 1972, E(): 4.6e-115, (72.45% identity in 403 aa overlap)	UniProt_AC=P65097	Is_Pseudogene=No	intermediary metabolism and respiration
Rv3406	1.14509	1.62396	0.00125361	0.0261059		Rv3406	3825330	3826217	+	Rv3406	Probable dioxygenase	Comments=Rv3406, (MTCY78.22c), len: 295 aa. Probable dioxygenase, highly similar to Q9WWU|ATSK putative alpha-ketoglutarate dependent dioxygenase from Pseudomonas putida (301 aa), FASTA scores: opt: 994, E(): 3.9e-57, (53.7% identity in 283 aa overlap)	UniProt_AC=P65075	Is_Pseudogene=No	intermediary metabolism and respiration
Rv3570c	-0.611454	4.54776	0.00127097	0.0261888		Rv3570c	4011086	4012270	-	hsaA	Possible oxidoreductase. Possible 3-hydroxy-9,10-seconandrost-1,3,5(10)-triene-9,17-dione hydroxylase.	Comments=Rv3570c, (MTCY06G11.17c), len: 394 aa. Possible hsaA, oxidoreductase, most similar to hydroxylases and oxygenases (and also some similarity to acyl-CoA dehydrogenases) e.g. O69349 hydroxylase from Rhodococcus erythropolis (393 aa), FASTA scores: opt: 958, E(): 1.1e-53, (39.95% identity in 383 aa overlap)	UniProt_AC=P96852	Is_Pseudogene=No	intermediary metabolism and respiration
Rv3581c	-0.661818	5.94973	0.000591756	0.0149466		Rv3581c	4023868	4024347	-	ispF	Probable 2C-methyl-D-erythritol 2,4-cyclodiphosphate synthase IspF (MECPS)	Comments=Rv3581c, (MT3687, MTCY06G11.28c), len: 159 aa. Probable ispF, 2-C-methyl-D-erythritol 2,4-cyclodiphosphate synthase, equivalent to Q9CCW5|ML0322 putative 2-C-methyl-D-erythritol 2,4-cyclodiphosphate synthase from Mycobacterium leprae (158 aa), FASTA scores: opt: 830, E(): 2.9e-47, (79.1% identity in 158 aa overlap). Also highly similar to others e.g. Q9L0Q7|ISPF_STRCO|SCD8A.07 from Strep…	UniProt_AC=P65183	Is_Pseudogene=No	intermediary metabolism and respiration
Rv3618	1.07827	4.10716	2.45257e-08	2.40045e-06		Rv3618	4058698	4059885	+	Rv3618	Possible monooxygenase	Comments=Rv3618, (MTCY15C10.34c, MTCY07H7B.04c), len: 395 aa. Possible monooxygenase, similar to others (principally bacterial luciferases alpha chain) e.g. Q9JN87|MMYO putative alkanal monooxygenase from Streptomyces coelicolor (373 aa), FASTA scores: opt: 949, E(): 8.9e-54, (41.7% identity in 374 aa overlap)	UniProt_AC=O07914	Is_Pseudogene=No	intermediary metabolism and respiration
Rv3628	0.647757	3.17175	0.00290055	0.047119		Rv3628	4067423	4067911	+	ppa	Inorganic pyrophosphatase Ppa (pyrophosphate phospho-hydrolase) (PPASE) (inorganic diphosphatase) (diphosphate phospho-hydrolase)	Comments=Rv3628, (MTCY15C10.24), len: 162 aa. Ppa, inorganic pyrophosphatase (see Triccas & Gicquel 2001), identical to O69540|IPYR_MYCLEPPA|ML0210|MLCB2548.21 inorganic pyrophosphatase from Mycobacterium leprae (162 aa) FASTA scores: opt: 1018, E(): 1.3e-59, (89.5% identity in 162 aa overlap). Also highly similar to many bacterial pyrophosphatases e.g. Q9X8I9|IPYR_STRCO|PPA|SCE9.16 from Streptom…	UniProt_AC=P65746	Is_Pseudogene=No	intermediary metabolism and respiration
Rv3841	-0.884747	6.54076	2.0059e-05	0.000969516		Rv3841	4314178	4314723	+	bfrB	Bacterioferritin BfrB	Comments=Rv3841, (MTCY01A6.28c), len: 181 aa. bfrB, bacterioferritin, similar to other ferritin or hypothetical proteins e.g. O26261|MTH158|RSGA ferritin like protein from Methanothermobacter thermautotrophicus (171 aa), FASTA scores: opt: 277, E(): 6.6e-11, (30.1% identity in 166 aa overlap)	UniProt_AC=P96237	Is_Pseudogene=No	intermediary metabolism and respiration
Rv3842c	-0.607101	6.11866	0.00152005	0.0299046		Rv3842c	4314738	4315562	-	glpQ1	Probable glycerophosphoryl diester phosphodiesterase GlpQ1 (glycerophosphodiester phosphodiesterase)	Comments=Rv3842c, (MTCY01A6.27), len: 274 aa. Probable glpQ1, glycerophosphoryl diester phosphodiesterase, equivalent to Q9CDC5|GLPQ|ML0074 putative glycerophosphoryl diester phosphodiesterase from Mycobacterium leprae (271 aa), FASTA scores: opt: 1635, E(): 1.9e-100, (88.85% identity in 269 aa overlap). Also highly similar to others e.g. CAC44700|SCBAC25E3.13c putative phosphodiesterase from Str…	UniProt_AC=P96236	Is_Pseudogene=No	intermediary metabolism and respiration
Rv3854c	-1.21406	6.45515	1.19164e-08	1.2277e-06		Rv3854c	4326004	4327473	-	ethA	Monooxygenase EthA	Comments=Rv3854c, (MTCY01A6.14), len: 489 aa. EthA (alternate gene names: aka, etaA), monooxygenase required for activation of the pro-drug ethionamide (see citations below), highly similar to other monooxygenases e.g. Q9A588|CC2569 monooxygenase (flavin-binding family) from Caulobacter crescentus (498 aa), FASTA scores: opt: 1959, E(): 2.9e-114, (57.6% identity in 481 aa overlap)	UniProt_AC=P96223	Is_Pseudogene=No	intermediary metabolism and respiration
Rv3886c	0.616881	3.92354	0.00192836	0.0357391		Rv3886c	4368518	4370170	-	mycP2	Probable alanine and proline rich membrane-anchored mycosin MycP2 (serine protease) (subtilisin-like protease) (subtilase-like) (mycosin-2)	Comments=Rv3886c, (MTCY15F10.26), len: 550 aa. Probable mycP2, ala-, pro-rich membrane-anchored serine protease (mycosin) (see citation below), highly similar to Q9CBV3|ML1538 possible protease from Mycobacterium leprae (567 aa), FASTA scores: opt: 1034, E(): 3.9e-32, (43.5% identity in 575 aa overlap)	UniProt_AC=O05458	Is_Pseudogene=No	intermediary metabolism and respiration
Rv3914	0.914163	3.72546	0.00010679	0.00388369		Rv3914	4402732	4403082	+	trxC	Thioredoxin TrxC (TRX) (MPT46)	Comments=Rv3914, (MT4033, MTV028.05), len: 116 aa. TrxC (alternate gene names: mpt46, trx, trxA *), thioredoxin (see citations below), equivalent to O30974|THIO_MYCSM|TRXA thioredoxin from Mycobacterium smegmatis (112 aa), FASTA scores: opt: 576, E(): 2.1e-32, (80.2% identity in 111 aa overlap)	UniProt_AC=P0A616	Is_Pseudogene=No	intermediary metabolism and respiration
Rv0119	0.737514	4.12833	0.000136927	0.00478634		Rv0119	144049	145626	+	fadD7	Probable fatty-acid-CoA ligase FadD7 (fatty-acid-CoA synthetase) (fatty-acid-CoA synthase)	Comments=Rv0119, (MTV031.13-MTCI418B.01), len: 525 aa. Probable fadD7, fatty-acid-CoA synthetase, similar to 4-coumarate:CoA ligase of many organisms e.g. U39405|PTU39405_1 4-coumarate:CoA ligase from Pinus taedaxylem (537 aa), FASTA scores: opt: 483, E(): 8.3e-22, (28.2% identity in 440 aa overlap). Contains PS00455 Putative AMP-binding domain signature.	UniProt_AC=O07169	Is_Pseudogene=No	lipid metabolism
Rv0129c	0.669756	6.25531	0.000512298	0.0132824		Rv0129c	156578	157600	-	fbpC	Secreted antigen 85-C FbpC (85C) (antigen 85 complex C) (AG58C) (mycolyl transferase 85C) (fibronectin-binding protein C)	Comments=Rv0129c, (MT0137, MTCI5.03c), len: 340 aa. FbpC (alternate gene names: mpt45, 85C, fbpC2), secreted antigen 85c (fibronectin-binding protein C) (mycolyl transferase 85C) (see citations below), also highly similar to other Mycobacterial antigen precursors e.g. A85C_MYCLE|Q05862 antigen 85-c precursor (85c) from Mycobacterium leprae (333 aa), FASTA scores: opt: 1937, E(): 0, (81.4% identit…	UniProt_AC=P0A4V4	Is_Pseudogene=No	lipid metabolism
Rv0145	-0.613897	6.9084	0.00173946	0.0333823		Rv0145	171215	172168	+	Rv0145	Possible S-adenosylmethionine-dependent methyltransferase	Comments=Rv0145, (MTCI5.19), len: 317 aa. Possible S-adenosylmethionine-dependent methyltransferase (see Grana et al., 2007), highly similar to many e.g. CAC32172.1|AL583926 conserved hypothetical protein from Mycobacterium leprae (310 aa)	UniProt_AC=P96822	Is_Pseudogene=No	lipid metabolism
Rv0242c	-0.764219	6.31018	6.96373e-05	0.00269931		Rv0242c	290665	292029	-	fabG4	Probable 3-oxoacyl-[acyl-carrier protein] reductase FabG4 (3-ketoacyl-acyl carrier protein reductase)	Comments=Rv0242c, (MTV034.08c), len: 454 aa. Probable fabG4, 3-oxoacyl-[acyl-carrier protein] reductase, equivalent to 3063883|CAA18568.1|AL022486|MLCB1883_13|T44878 3-oxoacyl-[acyl-carrier protein] reductase homolog from Mycobacterium leprae (454 aa), FASTA scores: opt: 2486, E(): 0, (84.8% identity in 454 aa overlap). C-terminal part highly similar to many FabG proteins e.g. U39441|VHU3944 1_2 …	UniProt_AC=O53665	Is_Pseudogene=No	lipid metabolism
Rv0243	-0.723604	7.17679	0.000275934	0.00800209		Rv0243	292171	293493	+	fadA2	Probable acetyl-CoA acyltransferase FadA2 (3-ketoacyl-CoA thiolase) (beta-ketothiolase)	Comments=Rv0243, (MTV034.09), len: 440 aa. Probable fadA2, acetyl-CoA acyltransferase (3-acyl-CoA thiolase), equivalent, but shorter 17 aa, to AL022486|MLCB1883_14T44879 acetyltransferase from Mycobacterium leprae (457 aa), FASTA scores: opt: 250 7, E(): 0, (87.6% identity in 435 aa overlap). Also highly similar to many e.g. G83046|PA478 probable acyl-CoA thiolase from Pseudomonas aeruginosa (425…	UniProt_AC=O86361	Is_Pseudogene=No	lipid metabolism
Rv0468	0.705317	4.33954	0.000226906	0.00683335		Rv0468	558895	559755	+	fadB2	3-hydroxybutyryl-CoA dehydrogenase FadB2 (beta-hydroxybutyryl-CoA dehydrogenase) (BHBD)	Comments=Rv0468, (MTV038.12), len: 286 aa. fadB2, 3-hydroxybutyryl-CoA dehydrogenase, equivalent to CAC31978.1|AL583925 3-hydroxyacyl-CoA dehydrogenase from Mycobacterium leprae (287 aa). Also similar to many 3-hydroxybutyryl-CoA dehydrogenases e.g. U32229|BJU32229_1 beta-hydroxybutyryl coenzyme A dehydrogenase from Bradyrhizobium japonicum (293 aa), FASTA scores: opt: 771, E(): 0, (45.7% identit…	UniProt_AC=O53753	Is_Pseudogene=No	lipid metabolism
Rv0824c	-1.48303	8.53187	1.43662e-12	2.67826e-10		Rv0824c	917734	918750	-	desA1	Probable acyl-[acyl-carrier protein] desaturase DesA1 (acyl-[ACP] desaturase) (stearoyl-ACP desaturase) (protein Des)	Comments=Rv0824c, (MTV043.16c), len: 338 aa. Probable desA1 (alternate gene name: des), acyl-[acyl-carrier protein] desaturase (stearoyl-ACP desaturase) (see Jackson et al., 1997), equivalent to U15182|MLU15182_32 acyl-[ACP] desaturase from Mycobacterium leprae (338 aa), FASTA scores: opt: 1880, E(): 0, (79.9% identity in 338 aa overlap)	UniProt_AC=Q50824	Is_Pseudogene=No	lipid metabolism
Rv0859	2.38889	7.23466	4.70834e-31	2.30414e-28		Rv0859	955077	956288	+	fadA	Possible acyl-CoA thiolase FadA	Comments=Rv0859, (MTV043.52), len: 403 aa. Possible fadA, acyl-CoA thiolase, equivalent to NP_302423.1|NC_002677 putative beta-ketoadipyl CoA thiolase from Mycobacterium leprae (403 aa). Also highly similar to acyl/acetyl-CoA thiolases and beta-ketoadipyl CoA thiolases, e.g. T35428 probable acetyl CoA acetyltransferase (thiolase) from Streptomyces coelicolor (404 aa)	UniProt_AC=O53871	Is_Pseudogene=No	lipid metabolism
Rv0860	2.261	8.36809	6.69184e-30	2.91095e-27		Rv0860	956293	958455	+	fadB	Probable fatty oxidation protein FadB	Comments=Rv0860, (MTV043.53), len: 720 aa. Probable fadB, fatty oxidation protein, equivalent to NP_302422.1|NC_002677 putative fatty oxidation complex alpha subunit from Mycobacterium leprae (714 aa). Also highly similar to others and various proteins involved in fatty acid metabolism, e.g. T35429 probable fatty oxidation protein from Streptomyces coelicolor (733 aa)	UniProt_AC=O53872	Is_Pseudogene=No	lipid metabolism
Rv0971c	1.71187	3.6793	1.77512e-14	3.65768e-12		Rv0971c	1081775	1082584	-	echA7	Probable enoyl-CoA hydratase EchA7 (enoyl hydrase) (unsaturated acyl-CoA hydratase) (crotonase)	Comments=Rv0971c, (MTCY10D7.03), len: 269 aa. Probable echA7, enoyl-CoA hydratase, similar to many e.g. CAB95895.1|AL359988 putative enoyl CoA hydratase from Streptomyces coelicolor (247 aa)	UniProt_AC=P71540	Is_Pseudogene=No	lipid metabolism
Rv0972c	2.60786	4.85852	3.2755e-34	2.13727e-31		Rv0972c	1082584	1083750	-	fadE12	Acyl-CoA dehydrogenase FadE12	Comments=Rv0972c, (MTCY10D7.02), len: 388 aa. fadE12, acyl-CoA dehydrogenase, highly similar to many e.g. CAB95893.1|AL359988 putative acyl CoA dehydrogenase from Streptomyces coelicolor (382 aa)	UniProt_AC=P71539	Is_Pseudogene=No	lipid metabolism
Rv0973c	2.58753	4.99322	2.36649e-35	1.85296e-32		Rv0973c	1083747	1085750	-	accA2	Probable acetyl-/propionyl-coenzyme A carboxylase alpha chain (alpha subunit) AccA2: biotin carboxylase + biotin carboxyl carrier protein (BCCP)	Comments=Rv0973c, (MTV044.01c, MTCY10D7.01), len: 667 aa. Probable accA2 (alternate gene name: bccA), acetyl-/propionyl-coenzyme A carboxylase (alpha subunit) [includes: biotin carboxylase	UniProt_AC=P71538	Is_Pseudogene=No	lipid metabolism
Rv0974c	2.76463	4.43934	3.35073e-39	3.27953e-36		Rv0974c	1085756	1087345	-	accD2	Probable acetyl-/propionyl-CoA carboxylase (beta subunit) AccD2	Comments=Rv0974c, (MTV044.02c), len: 529 aa. Probable accD2, acetyl-/propionyl-CoA carboxylase (beta subunit), highly similar to many e.g. CAB95891.1|AL35998 putative acetyl/propionyl CoA carboxylase beta subunit from Streptomyces coelicolor (532 aa)	UniProt_AC=O86318	Is_Pseudogene=No	lipid metabolism
Rv0975c	2.48931	4.1719	3.90801e-31	2.18569e-28		Rv0975c	1087348	1088496	-	fadE13	Probable acyl-CoA dehydrogenase FadE13	Comments=Rv0975c, (MTV044.03c), len: 382 aa. Probable fadE13, acyl-CoA dehydrogenase, highly similar to many e.g. T35427 probable acyl-CoA dehydrogenase from Streptomyces coelicolor (382 aa)	UniProt_AC=O86319	Is_Pseudogene=No	lipid metabolism
Rv1013	0.652657	5.54284	0.000881994	0.0198449		Rv1013	1131625	1133259	+	pks16	Putative polyketide synthase Pks16	Comments=Rv1013, (MTCI237.30-MTCY10G2.36c), len: 544 aa. Putative pks16, polyketide synthase, similar to many e.g. N-terminus of Q50857|U24657 saframycin MX1 synthetase B (1770 aa), FASTA scores: opt: 526, E(): 1.4e-25, (29.3% identity in 542 aa overlap)	UniProt_AC=O05598	Is_Pseudogene=No	lipid metabolism
Rv1094	-1.09133	8.05324	2.89733e-07	2.18136e-05		Rv1094	1221959	1222786	+	desA2	Possible acyl-[acyl-carrier protein] desaturase DesA2 (acyl-[ACP] desaturase) (stearoyl-ACP desaturase)	Comments=Rv1094, (MTV017.47), len: 275 aa. Possible desA2, acyl-[acyl-carrier protein] desaturase (stearoyl-ACP desaturase), equivalent to AL049491|MLCB1222_15 from Mycobacterium leprae (275 aa), FASTA score: (78.1% identity in 274 aa overlap). Also weakly similar to plant stearoyl-acyl carrier protein desaturases, and very similar to U49839|MTV043.16C|Rv0824c enzyme desA1 from Mycobacterium tube…	UniProt_AC=O53442	Is_Pseudogene=No	lipid metabolism
Rv2188c	0.749475	3.14123	0.000711582	0.0168839		Rv2188c	2449993	2451150	-	pimB	Mannosyltransferase PimB	Comments=Rv2188c, (MTV021.21c), len: 385 aa. PimB (previously known as pimB'), mannosyltransferase. Equivalent to Mycobacterium leprae ML0886 putative glycosyl transferase (384 aa). FASTA scores: ML0886 (CAA18697.1| (AL022602) ) opt: 2113, E(): 1.8e-106	UniProt_AC=O53522	Is_Pseudogene=No	lipid metabolism
Rv2243	0.594565	5.81051	0.00302995	0.0486158		Rv2243	2516787	2517695	+	fabD	Malonyl CoA-acyl carrier protein transacylase FabD (malonyl CoA:ACPM acyltransferase) (MCT)	Comments=Rv2243, (MTCY427.24), len: 302 aa. FabD (alternate gene name: mtFabD), malonyl CoA-acyl carrier protein transacylase (see citations below), highly similar to e.g. A57356 acyl-CoA carrier protein malonyltransferase from Streptomyces coelicolor (316 aa), FASTA score: opt: 955, E(): 0, (52.6% identity in 304 aa overlap)	UniProt_AC=P63458	Is_Pseudogene=No	lipid metabolism
Rv2252	0.890637	2.4974	0.000687659	0.0166184		Rv2252	2526989	2527918	+	Rv2252	Diacylglycerol kinase	Comments=Rv2252, (MTV022.02), len: 309 aa. Diacylglycerol kinase (See Owens et al., 2006), similar to hypothetical proteins from Bacillus subtilis (e.g. BSUB0004_120), Streptomyces coelicolor A3(2) >emb|CAB61184.1| (AL132973) hypothetical protein SCF91.27c (293 aa) and P39074. FASTA scores: Z99107|BSUB0004_120 Bacillus subtilis complete genome (303 aa) opt: 397, E(): 1.7e-19	UniProt_AC=O53526	Is_Pseudogene=No	lipid metabolism
Rv2380c	0.648281	4.87317	0.00255566	0.0433191		Rv2380c	2662067	2667115	-	mbtE	Peptide synthetase MbtE (peptide synthase)	Comments=Rv2380c, (MTCY22H8.05), len: 1682 aa. MbtE, peptide synthetase (see citations below), similar in part to several synthases e.g. O07944|SNBDE pristinamycin I synthase 3 and 4 from Streptomyces pristinaespiralis (4848 aa), FASTA scores: opt: 2635, E(): 1.9e-146, (36.8% identity in 1657 aa overlap)	UniProt_AC=O86329	Is_Pseudogene=No	lipid metabolism
Rv2382c	1.01011	2.34636	0.000757364	0.0175449		Rv2382c	2670269	2671603	-	mbtC	Polyketide synthetase MbtC (polyketide synthase)	Comments=Rv2382c, (MTCY22H8.03), len: 444 aa. MbtC, polyketide synthase (see citations below), similar in part to several synthases e.g. Q9F7T9 avermectin polyketide synthase (fragment) from Streptomyces avermitilis (3626 aa), FASTA scores: opt: 1458, E(): 7e-82, (50.65% identity in 446 aa overlap)	UniProt_AC=P71718	Is_Pseudogene=No	lipid metabolism
Rv2383c	0.731332	3.9109	0.000587509	0.0149357		Rv2383c	2671593	2675837	-	mbtB	Phenyloxazoline synthase MbtB (phenyloxazoline synthetase)	Comments=Rv2383c, (MTCY22H8.02), len: 1414 aa. MbtB, phenyloxazoline synthase (see citations below), similar to the N-terminal region of several synthetases e.g. Q9EWP5|SC4C2.17 putative non-ribosomal peptide synthase from Streptomyces coelicolor (2229 aa), FASTA scores: opt: 2878, E(): 4.1e-156, (46.85% identity in 1138 aa overlap)	UniProt_AC=P71717	Is_Pseudogene=No	lipid metabolism
Rv2590	-1.24467	7.41275	4.03843e-09	4.39179e-07		Rv2590	2917871	2921377	+	fadD9	Probable fatty-acid-CoA ligase FadD9 (fatty-acid-CoA synthetase) (fatty-acid-CoA synthase)	Comments=Rv2590, (MTCY227.11c), len: 1168 aa. Probable fadD9, fatty-acid-CoA synthetase, highly similar to O69484|FADD9 (alias Q9CCT4|FADD9|ML0484 but longer 14 aa) putative acyl-CoA synthetase from Mycobacterium leprae (1174 aa), FASTA scores: opt: 5247, E(): 0, (68.0% identity in 1178 aa overlap). N-terminal (approximately 700 residues) similar to other long chain fatty acid ligases. And C-term…	UniProt_AC=Q50631	Is_Pseudogene=No	lipid metabolism
Rv2724c	2.90753	6.7274	5.24097e-42	1.02592e-38		Rv2724c	3036131	3037291	-	fadE20	Probable acyl-CoA dehydrogenase FadE20	Comments=Rv2724c, (MTCY154.04c), len: 386 aa. Probable fadE20, acyl-CoA dehydrogenase, highly similar to many e.g. Q9X7Y2|SC6A5.36 from Streptomyces coelicolor (382 aa), FASTA scores: opt: 1583, E(): 6.9e-94, (62.7% identity in 378 aa overlap)	UniProt_AC=O33229	Is_Pseudogene=No	lipid metabolism
Rv2934	1.73513	6.3374	1.5703e-16	3.6163e-14		Rv2934	3262248	3267731	+	ppsD	Phenolpthiocerol synthesis type-I polyketide synthase PpsD	Comments=Rv2934, (MTCY19H9.02), len: 1827 aa. PpsD, type-I polyketide synthase (see citations below), highly similar to others from Mycobacterium leprae e.g. Q9CB70|ML2354 polyketide synthase (1822 aa), FASTA scores: opt: 9779, E(): 0, (80.35% identity in 1836 aa overlap)	UniProt_AC=P96203	Is_Pseudogene=No	lipid metabolism
Rv2935	0.747028	6.90853	0.000215576	0.00654249		Rv2935	3267737	3272203	+	ppsE	Phenolpthiocerol synthesis type-I polyketide synthase PpsE	Comments=Rv2935, (MTCY19H9.03), len: 1488 aa. PpsE, type-I polyketide synthase (see citations below). Contains PS00606 Beta-ketoacyl synthases active site. Note that Rv2935|ppsE belongs to the transcriptional unit Rv2930|fadD26-Rv2939|papA5 (proven experimentally). TesA|Rv2928 interacts with PpsE|Rv2935, by bacterial two-hybrid and GST-pulldown assays (See Rao and Ranganathan, 2004).	UniProt_AC=P96204	Is_Pseudogene=No	lipid metabolism
Rv2939	-0.817774	5.70086	4.662e-05	0.00198388		Rv2939	3274949	3276217	+	papA5	Possible conserved polyketide synthase associated protein PapA5	Comments=Rv2939, (MTCY19H9.07), len: 422 aa. Possible papA5, conserved polyketide synthase (PKS) associated protein (see Camacho et al., 2001), equivalent to Q49939 hypothetical 45.6 KDA protein from Mycobacterium leprae (423 aa), FASTA scores: opt: 2398, E(): 4.5e-144, (84.05% identity in 426 aa overlap)	UniProt_AC=P96208	Is_Pseudogene=No	lipid metabolism
Rv2940c	-0.805653	9.11144	1.89373e-05	0.000926746		Rv2940c	3276380	3282715	-	mas	Probable multifunctional mycocerosic acid synthase membrane-associated Mas	Comments=Rv2940c, (MTCY24G1.09, MTCY19H9.08c), len: 2111 aa. Probable mas, mycocerosic acid synthase membrane associated, multifunctional enzyme (see citations below), almost identical to Q02251|MCAS_MYCBO|mas mycocerosic acid synthase from Mycobacterium bovis (2110 aa), FASTA scores: opt: 13226, E(): 0, (95.8% identity in 2115 aa overlap) (see Mathur & Kolattukudy 1992)	UniProt_AC=P96291	Is_Pseudogene=No	lipid metabolism
Rv2946c	-0.69296	7.34114	0.00049203	0.012842		Rv2946c	3291503	3296353	-	pks1	Probable polyketide synthase Pks1	Comments=Rv2946c, (MTCY24G1.03), len: 1616 aa. Probable pks1, polyketide synthase, similar to many e.g. ML035|AL583917|Q9CD81 putative polyketide synthase from Mycobacterium leprae (2103 aa), Fasta scores: opt: 8761, E(): 0, (82.6% identity in 1620 aa overlap)	UniProt_AC=P96285	Is_Pseudogene=No	lipid metabolism
Rv2947c	-0.637198	6.76743	0.00114997	0.0246019		Rv2947c	3296350	3297840	-	pks15	Probable polyketide synthase Pks15	Comments=Rv2947c, (MTCY24G1.02), len: 496 aa. Probable pks15, polyketide synthase. Almost identical to G560508|Q50469 PKS002B protein from Mycobacterium tuberculosis (495 aa), FASTA scores: opt: 3270, E(): 0, (99.6% identity in 496 a a overlap). Similar to Mycobacterium tuberculosis proteins MTCY338.20|RV2931|PPSA_MYCTU ppsA phenolpthiocerol synthesis (1876 aa) (49.9% identity in 465 aa overlap)	UniProt_AC=P96284	Is_Pseudogene=No	lipid metabolism
Rv2948c	-0.750226	7.80281	0.000166877	0.00547757		Rv2948c	3297837	3299954	-	fadD22	P-hydroxybenzoyl-AMP ligase FadD22	Comments=Rv2948c, (MTCY24G1.01), len: 705 aa. FadD22, p-hydroxybenzoyl-AMP ligase. Highly similar to many e.g. Q9CD82|ML0134 putative acyl-CoA synthetase from Mycobacterium leprae (707 aa), fasta scores: opt: 3554, E(): 6.4e-209, (75.9% identity in 705 aa overlap). Almost identical to G560509|Q50468 PKS002A protein from Mycobacterium tuberculosis (705 aa), fasta scores: opt: 4647, E(): 0, (99.7% …	UniProt_AC=P96283	Is_Pseudogene=No	lipid metabolism
Rv3130c	-2.43129	1.39074	1.30245e-07	1.04063e-05		Rv3130c	3494975	3496366	-	tgs1	Triacylglycerol synthase (diacylglycerol acyltransferase) Tgs1	Comments=Rv3130c, (MTCY03A2.28, MTCY164.41c), len: 463 aa. tgs1, triacylglycerol synthase (See Daniel et al., 2004	UniProt_AC=P0A650	Is_Pseudogene=No	lipid metabolism
Rv3139	-0.782531	5.5759	0.000129873	0.00462231		Rv3139	3505363	3506769	+	fadE24	Probable acyl-CoA dehydrogenase FadE24	Comments=Rv3139, (MTCY03A2.19c), len: 468 aa. Probable fadE24, acyl-CoA dehydrogenase (1.3.99.-), equivalent to O32890|MLCB1779.30|FADE24|ML0661 putative acyl-CoA dehydrogenase from Mycobacterium leprae (465 aa), FASTA scores: opt: 2587, E(): 4e-153, (83.6% identity in 464 aa overlap). Similar to other e.g. Q9HUH0|PA4995 from Pseudomonas aeruginosa (429 aa), FASTA scores: opt: 1139, E(): 2.8e-63,…	UniProt_AC=P95187	Is_Pseudogene=No	lipid metabolism
Rv3140	-0.734976	6.39506	0.000272374	0.00795779		Rv3140	3506790	3507995	+	fadE23	Probable acyl-CoA dehydrogenase FadE23	Comments=Rv3140, (MTCY03A2.18c), len: 401 aa. Probable fadE23, acyl-CoA dehydrogenase (1.3.99.-) (see citation below), equivalent to O32891|MLCB1779.31|FADE23|ML0660 putative acyl-CoA dehydrogenase from Mycobacterium leprae (400 aa), FASTA scores: opt: 2307, E(): 3e-136, (89.5% identity in 401 aa overlap). Also similar to others e.g. Q9HUH1|PA4994 from Pseudomonas aeruginosa (402 aa), FASTA score…	UniProt_AC=P95186	Is_Pseudogene=No	lipid metabolism
Rv3221c	-0.626691	4.61294	0.000827053	0.0188251		Rv3221c	3597551	3597766	-	TB7.3	Biotinylated protein TB7.3	Comments=Rv3221c, (MTCY07D11.05), len: 71 aa. TB7.3, Biotinylated protein (see citations below), equivalent (appears to have one additional residue) to Q9CCH9|ML0802|BTB7_MYCLE biotinylated protein TB7.3 homolog from Mycobacterium leprae (70 aa), FASTA scores: opt: 367, E(): 4e-18, (90.0% identity in 70 aa overlap)	UniProt_AC=P0A510	Is_Pseudogene=No	lipid metabolism
Rv3229c	-1.53496	8.06915	3.55354e-11	5.56484e-09		Rv3229c	3605751	3607034	-	desA3	Possible linoleoyl-CoA desaturase (delta(6)-desaturase)	Comments=Rv3229c, (MTCY20B11.04c), len: 427 aa. DesA3, linoleoyl-CoA desaturase, showing similarity with desaturases and other proteins e.g. Q08871|DES6|SLL0262 linoleoyl-CoA desaturase from Synechocystis sp. strain PCC 6803 (359 aa), FASTA scores: opt: 319, E(): 4e-13, (25.1% identity in 295 aa overlap)	UniProt_AC=Q7D5W1	Is_Pseudogene=No	lipid metabolism
Rv3523	-0.906405	4.71745	3.20408e-06	0.000191522		Rv3523	3959529	3960713	+	ltp3	Probable lipid carrier protein or keto acyl-CoA thiolase Ltp3	Comments=Rv3523, (MTCY03C7.33c), len: 394 aa. Probable ltp3, lipid carrier protein or keto acyl-CoA thiolase, similar to several e.g. O30037|AF0202 3-ketoacyl-CoA thiolase (ACAB-6) from Archaeoglobus fulgidus (380 aa) FASTA scores: opt: 782, E(): 1.7e-40, (38.35% identity in 386 aa overlap)	UniProt_AC=P71878	Is_Pseudogene=No	lipid metabolism
Rv0159c	2.94957	6.112	9.94893e-41	1.29834e-37		Rv0159c	187433	188839	-	PE3	PE family protein PE3	Comments=Rv0159c, (MTV032.02c), len: 468 aa. PE3, Member of the Mycobacterium tuberculosis PE family (see citation below), similar to many other PE proteins e.g. O06828 from Mycobacterium tuberculosis (528 aa), FASTA scores: opt: 1163, E(): 0, (45.8% identity in 467 aa overlap). Also highly similar to upstream MTV032_3, and to MTCI5_25, MTCI5_26, MTV049_ 21, MTCY1A10_26, etc.	UniProt_AC=Q79G04	Is_Pseudogene=No	PE/PPE
Rv0305c	0.888185	4.14663	4.01726e-06	0.000227936		Rv0305c	372820	375711	-	PPE6	PPE family protein PPE6	Comments=Rv0305c, (MTCY63.10c), len: 963 aa. PPE6, Member of the Mycobacterium tuberculosis PE family (PPE, MPTR), similar to others e.g. Y04H_MYCTU|Q10778 from Mycobacterium tuberculosis (734 aa), FASTA scores: opt: 1340, E(): 0, (40.9% identity in 815 aa overlap).	UniProt_AC=Q6MX48	Is_Pseudogene=No	PE/PPE
Rv0578c	-0.804674	6.02474	3.14618e-05	0.00146634		Rv0578c	671996	675916	-	PE_PGRS7	PE-PGRS family protein PE_PGRS7	Comments=Rv0578c, (MTV039.16c), len: 1306 aa. PE_PGRS7, Member of the Mycobacterium tuberculosis PE family, PGRS subfamily of gly-rich proteins (see citation below), highly similar to many other PGRS proteins e.g. MTCY493.04|Z95844 from Mycobacterium tuberculosis (1329 aa), FASTA scores: opt: 3994, E(): 0, (54.6% identity in 1375 aa overlap). Contains two PS00583 pfkB family of carbohydrate kinas…	UniProt_AC=Q6MX28	Is_Pseudogene=No	PE/PPE
Rv1195	-1.14136	6.87701	6.23092e-07	4.40885e-05		Rv1195	1339003	1339302	+	PE13	PE family protein PE13	Comments=Rv1195, (MTCI364.07), len: 99 aa. PE13, Member of Mycobacterium tuberculosis PE family (see Brennan & Delogu 2002), e.g. Y0DP_MYCTU|Q50615 hypothetical glycine-rich 40.8 kd protein (498 aa), FASTA scores: opt: 307, E(): 1.4e-12, (56.3% identity in 96 aa overlap), similar to MTCY21C12.10c (99 aa), FASTA scores: opt:295, E(): 1.9e-11, (51.5% identity in 97 aa overlap).	UniProt_AC=Q79FR3	Is_Pseudogene=No	PE/PPE
Rv1196	-1.18189	8.1754	3.37372e-08	3.14479e-06		Rv1196	1339349	1340524	+	PPE18	PPE family protein PPE18	Comments=Rv1196, (MTCI364.08), len: 391 aa. PPE18 (alternate gene name: mtb39a). Member of the Mycobacterium tuberculosis PPE family of glycine-rich proteins, highly similar to others e.g. Y07P_MYCTU|Q11031 hypothetical 40.0 kDa protein cy02b10.25c (396 aa), FASTA scores: opt: 2124, E(): 0, (85.1% identity in 397 aa overlap). Note that expression of Rv1196 was demonstrated in lysates by immunodet…	UniProt_AC=Q7D8M9	Is_Pseudogene=No	PE/PPE
Rv1808	0.668015	3.55337	0.00100613	0.0223806		Rv1808	2049921	2051150	+	PPE32	PPE family protein PPE32	Comments=Rv1808, (MTV049.30), len: 409 aa. PPE32, Member of the Mycobacterium tuberculosis PPE family of glycine-rich proteins, most similar to Rv1800|MTV049.22|AL022021 (655 aa), FASTA scores: opt: 1225, E(): 0, (55.1% identity in 423 aa overlap). Contains PS00343 Gram-positive cocci surface proteins 'anchoring' hexapeptide. Nucleotide position 2050913 in the genome sequence has been corrected, …	UniProt_AC=Q79FJ6	Is_Pseudogene=No	PE/PPE
Rv1809	0.858156	4.10105	7.62033e-06	0.000414356		Rv1809	2051282	2052688	+	PPE33	PPE family protein PPE33	Comments=Rv1809, (MTV049.31), len: 468 aa. PPE33, Member of the Mycobacterium tuberculosis PPE family of glycine-rich proteins, most similar to RV1802AL022021|MTV049.23 (463 aa), FASTA scores: opt: 1238, E(): 0, (51.2% identity in 471 aa overlap). Alternative nucleotide at position 2051746 (T->C	UniProt_AC=Q79FJ5	Is_Pseudogene=No	PE/PPE
Rv2352c	0.773708	3.96966	0.000131342	0.00463246		Rv2352c	2632923	2634098	-	PPE38	PPE family protein PPE38	Comments=Rv2352c, (MTCY98.21c), len: 391 aa. PPE38, Member of Mycobacterium tuberculosis PPE_family, highly similar to many e.g. Q10778|MTCY48.17|Y04H_MYCTU (734 aa), FASTA scores: opt: 713, E(): 2.8e-27, (37.7% identity in 430 aa overlap)	UniProt_AC=Q7D7A2	Is_Pseudogene=No	PE/PPE
Rv2591	-1.09229	4.4817	9.48343e-08	8.07122e-06		Rv2591	2921551	2923182	+	PE_PGRS44	PE-PGRS family protein PE_PGRS44	Comments=Rv2591, (MTCY227.10c), len: 543 aa. PE_PGRS44, Member of the Mycobacterium tuberculosis PE family, PGRS subfamily of gly-rich proteins (see citation below), highly similar to others e.g. O53845|Rv0834c|MTV043.26c from Mycobacterium tuberculosis (882 aa), FASTA scores: opt: 1813, E(): 5.8e-66, (55.3% identity in 568 aa overlap). Equivalent to AAK46982 from Mycobacterium tuberculosis strai…	UniProt_AC=Q50630	Is_Pseudogene=No	PE/PPE
Rv3558	0.826283	2.64283	0.000875198	0.0198058		Rv3558	3997980	3999638	+	PPE64	PPE family protein PPE64	Comments=Rv3558, (MTCY06G11.05), len: 552 aa. PPE64, Member of the Mycobacterium tuberculosis PPE family of glycine-rich proteins, similar to many e.g. P71868|Rv3533c|MTCY03C7.23 (582 aa), FASTA scores: opt: 1908, E(): 1.7e-83, (58.5% identity in 583 aa overlap). Predicted to be an outer membrane protein (See Song et al., 2008).	UniProt_AC=Q6MWW0	Is_Pseudogene=No	PE/PPE
Rv3892c	0.807786	3.57382	7.47413e-05	0.00284089		Rv3892c	4374484	4375683	-	PPE69	PPE family protein PPE69	Comments=Rv3892c, (MTCY15F10.20), len: 399 aa. PPE69, Member of the Mycobacterium tuberculosis PPE family of conserved proteins, similar to many e.g. O05298|Rv1196|MTCI364.08 from Mycobacterium leprae (391 aa), FASTA scores: opt: 348, E(): 2.2e-08, (26.6% identity in 380 aa overlap).	UniProt_AC=Q79F90	Is_Pseudogene=No	PE/PPE
Rv0081	-1.56854	1.58918	8.91638e-07	5.81794e-05		Rv0081	89575	89919	+	Rv0081	Probable transcriptional regulatory protein	Comments=Rv0081, (MTV030.25), len: 114 aa. Probable transcriptional regulator, highly similar to others.	UniProt_AC=O53626	Is_Pseudogene=No	regulatory proteins
Rv0158	-2.26307	2.40219	6.5722e-18	1.97924e-15		Rv0158	186785	187429	+	Rv0158	Probable transcriptional regulatory protein (possibly TetR-family)	Comments=Rv0158, (MTV032.01), len: 214 aa. Probable transcriptional regulator, possibly TetR family, showing weak similarity to various transcriptional activators and repressors e.g. P32398|YIXD_BACSU|YHGD hypothetical transcriptional regulatory protein from Bacillus subtilis (191 aa), FASTA scores: opt:172, E(): 2.4e-05, (23.0% identity in 191 aa overlap). Contains helix-turn-helix motif at aa 3…	UniProt_AC=O53641	Is_Pseudogene=No	regulatory proteins
Rv0196	-1.91415	5.00982	8.21017e-18	2.29592e-15		Rv0196	231647	232231	+	Rv0196	Possible transcriptional regulatory protein	Comments=Rv0196, (MTV033.04), len: 194 aa. Possible transcriptional regulatory protein, similar to two Bacillus subtilis regulators: P42105|YXAF_BACSU hypothetical 21.0 kDa protein (191 aa), FASTA scores: opt: 323, E(): 2.1e-15, (30.9% identity in 181 aa overlap)	UniProt_AC=O53647	Is_Pseudogene=No	regulatory proteins
Rv0474	-0.635318	3.93589	0.00161848	0.0316818		Rv0474	565021	565443	+	Rv0474	Probable transcriptional regulatory protein	Comments=Rv0474, (MTV038.18), len: 140 aa. Probable transcriptional regulator, highly similar to others e.g. CAC04034.1|AL391406 putative DNA-binding protein from Streptomyces coelicolor (141 aa)	UniProt_AC=O53759	Is_Pseudogene=No	regulatory proteins
Rv0823c	-1.69382	7.18656	2.35588e-16	5.12404e-14		Rv0823c	916477	917646	-	Rv0823c	Possible transcriptional regulatory protein	Comments=Rv0823c, (MTV043.15c), len: 389 aa. Possible transcriptional regulator (resembles nitrogen regulation protein), equivalent (but longer 24 aa in N-terminus) to MLU15182_31|U15182|NtrB NtrB protein from Mycobacterium leprae (384 aa), FASTA scores: opt: 2070, E(): 0, (82.3% identity in 384 aa overlap) (see citation below). Also highly similar to CAB63312.1|AL133471|SCC82.03c hypothetical pr…	UniProt_AC=O53835	Is_Pseudogene=No	regulatory proteins
Rv1266c	-0.765782	4.67792	0.000394928	0.0108883		Rv1266c	1413960	1415840	-	pknH	Probable transmembrane serine/threonine-protein kinase H PknH (protein kinase H) (STPK H)	Comments=Rv1266c, (MTCY50.16), len: 626 aa. Probable pknH, transmembrane serine/threonine-protein kinase (see citation below), similar to many e.g. PKN1_MYXXA|P33973 pkn1 (693 aa), FASTA scores: opt: 611, E(): 1.4e- 14, (29.7% identity in 492 aa overlap)	UniProt_AC=Q11053	Is_Pseudogene=No	regulatory proteins
Rv1657	1.43937	1.02886	0.000646442	0.0160179		Rv1657	1870842	1871354	+	argR	Probable arginine repressor ArgR (AHRC)	Comments=Rv1657, (MTCY06H11.22), len: 170 aa. Probable argR, Arginine repressor (alternate gene name: ahrC). Similar to AHRC_BACSU|P17893 arginine hydroximate resistance protein from Bacillus subtilis (149 aa), FASTA scores: opt: 283, E(): 1.8e-11, (34.5% identity in 142 aa overlap)	UniProt_AC=P0A4Y8	Is_Pseudogene=No	regulatory proteins
Rv1719	-0.975814	1.45515	0.00250168	0.042769		Rv1719	1945641	1946420	+	Rv1719	Probable transcriptional regulatory protein	Comments=Rv1719, (MTCY04C12.04), len: 259 aa. Probable transcriptional regulatory protein, similar to YIAJ_ECOLI|P37671 hypothetical transcriptional regulator from Escherichia coli (282 aa), FASTA scores: opt: 353, E(): 3.2e-15, (31.1% identity in 235 aa overlap). Similar to Mycobacterium tuberculosis hypothetical IclR-family transcriptional regulators Rv2989, Rv1773c. Helix-turn-helix motif from…	UniProt_AC=P71977	Is_Pseudogene=No	regulatory proteins
Rv1963c	0.742429	2.71715	0.00265449	0.0446022		Rv1963c	2205582	2206802	-	mce3R	Probable transcriptional repressor (probably TetR-family) Mce3R	Comments=Rv1963c, (MTV051.01c-MTCY09F9.01), len: 406 aa. Probable mce3R, negative transcriptional regulatory protein, TetR family (see citation below)	UniProt_AC=P95251	Is_Pseudogene=No	regulatory proteins
Rv2358	-0.835704	3.25011	0.000100835	0.00372422		Rv2358	2641246	2641653	+	smtB	Probable transcriptional regulatory protein SmtB (probably ArsR-family)	Comments=Rv2358, (MTCY27.22c), len: 135 aa. Probable smtB, transcriptional regulator, arsR family, equivalent to Q9CCG5|ML0825 putative ArsR-family transcriptional regulator from Mycobacterium leprae (140 aa), FASTA scores: opt: 647, E(): 2e-34, (72.9% identity in 140 aa overlap). Also similar to others e.g. BAB48273|MLR0745 Transcriptional regulator from Rhizobium loti (Mesorhizobium loti) (104 …	UniProt_AC=O05840	Is_Pseudogene=No	regulatory proteins
Rv2640c	-1.3648	1.57307	1.34614e-05	0.00069344		Rv2640c	2965478	2965837	-	Rv2640c	Possible transcriptional regulatory protein (probably ArsR-family)	Comments=Rv2640c, (MTCY441.10c), len: 119 aa. Possible transcriptional regulator, arsR family, highly similar to many e.g. Q9L1V5|SC4A9.07 putative ArsR-family transcriptional regulator from Streptomyces coelicolor (117 aa), FASTA scores: opt: 261, E(): 5.6e-10, (47.75% identity in 103 aa overlap)	UniProt_AC=P71939	Is_Pseudogene=No	regulatory proteins
Rv2919c	-0.765779	3.98411	5.02979e-05	0.00211738		Rv2919c	3230738	3231076	-	glnB	Probable nitrogen regulatory protein P-II GlnB	Comments=Rv2919c, (MTCY338.08c), len: 112 aa. Probable glnB, nitrogen regulatory protein, highly similar to others e.g. Q9X705|GLNB PII protein from Corynebacterium glutamicum (Brevibacterium flavum) (112 aa), FASTA scores: opt: 531, E(): 4.5e-30, (68.75% identity in 112 aa overlap)	UniProt_AC=P64249	Is_Pseudogene=No	regulatory proteins
Rv3173c	-0.812021	3.3595	9.25996e-05	0.00348584		Rv3173c	3541443	3542045	-	Rv3173c	Probable transcriptional regulatory protein (probably TetR/AcrR-family)	Comments=Rv3173c, (MTV014.17c), len: 200 aa. Probable transcriptional regulatory protein TetR family, similar to several bacterial putative regulatory proteins e.g. Q9EWI2|SC7H9.14 from Streptomyces coelicolor (195 aa), FASTA scores: opt: 319, E(): 1.7e-13, (34.55% identity in 195 aa overlap)	UniProt_AC=O53323	Is_Pseudogene=No	regulatory proteins
Rv3249c	0.598871	4.04742	0.00180833	0.0340367		Rv3249c	3629752	3630387	-	Rv3249c	Possible transcriptional regulatory protein (probably TetR-family)	Comments=Rv3249c, (MTCY20B11.24c), len: 211 aa. Possible transcriptional regulatory protein, TetR family, with similarity to several e.g. Q9AE61|ALKB1 putative TetR-regulatory from Rhodococcus erythropolis (208 aa), FASTA scores: opt: 503, E(): 7.7e-26, (40.6% identity in 192 aa overlap)	UniProt_AC=O05892	Is_Pseudogene=No	regulatory proteins
Rv3583c	-0.88004	8.51525	4.41121e-06	0.000246713		Rv3583c	4025056	4025544	-	Rv3583c	Possible transcription factor	Comments=Rv3583c, (MTV024.01c, MTCY06G11.30c), len: 162 aa. Possible transcriptional factor, identical to Q9CCW7|ML0320 putative transcription factor from Mycobacterium leprae (165 aa), FASTA scores: opt: 1004, E(): 6.1e-56, (97.55% identity in 162 aa overlap)	UniProt_AC=O53568	Is_Pseudogene=No	regulatory proteins
Rv3855	-1.21138	3.28301	4.96097e-08	4.51679e-06		Rv3855	4327549	4328199	+	ethR	Transcriptional regulatory repressor protein (TetR-family) EthR	Comments=Rv3855, (MTCY01A6.13c), len: 216 aa. EthR (alternate gene names: aka, etaR), regulatory protein TetR family, involved in ethionamide sensitivity/resistance, negatively controls neighbouring ethA (Rv3854c, MTCY01A6.14	UniProt_AC=P96222	Is_Pseudogene=No	regulatory proteins
Rv2818c	0.616178	3.62892	0.00194442	0.0357391		Rv2818c	3124996	3126144	-	Rv2818c	Hypothetical protein	Comments=Rv2818c, (MTCY16B7.25), len: 382 aa. Hypothetical unknown protein, equivalent to AAK47210 from Mycobacterium tuberculosis strain CDC1551 (430 aa) but shorter 48 aa. This region is a possible MT-complex-specific genomic island (See Becq et al., 2007).	UniProt_AC=P71635	Is_Pseudogene=No	unknown
Rv0251c	0.988447	4.82439	1.1361e-05	0.00060106		Rv0251c	302173	302652	-	hsp	Heat shock protein Hsp (heat-stress-induced ribosome-binding protein A)	Comments=Rv0251c, (MTV034.17c), len: 159 aa. Hsp (alternate gene name: hsp20, hrpA, acr2), heat-stress-induced ribosome-binding protein A (see citations below). Highly similar to AAD39038.1|AF072875_1|AF072875 putative HSP20 from Mycobacterium smegmatis (145 aa), FASTA scores: opt: 479, E(): 2.3e-24, (59.9% identity in 157 aa overlap)	UniProt_AC=O53673	Is_Pseudogene=No	virulence, detoxification, adaptation
Rv0440	2.16941	9.21079	1.45552e-19	5.18034e-17		Rv0440	528608	530230	+	groEL2	60 kDa chaperonin 2 GroEL2 (protein CPN60-2) (GroEL protein 2) (65 kDa antigen) (heat shock protein 65) (cell wall protein A) (antigen A)	Comments=Rv0440, (MTV037.04), len: 540 aa. GroEL2 (alternate gene names: groL2, groEL-2, hsp65, hsp60), 60 kDa chaperonin 2 (see Shinnick 1987). Purified 65 kDa antigen can elicit a strong delayed-type hypersensitivity reaction in experimental animals infected with M. tuberculosis. This protein is one of the major immunoreactive proteins of the mycobacteria. This antigen contains epitopes that ar…	UniProt_AC=P0A520	Is_Pseudogene=No	virulence, detoxification, adaptation
Rv0582	0.665931	3.05008	0.0027655	0.0456833		Rv0582	677922	678329	+	vapC26	Possible toxin VapC26. Contains PIN domain.	Comments=Rv0582, (MTV039.20), len: 135 aa. Possible vapC26, toxin, part of toxin-antitoxin (TA) operon with Rv0581, contains PIN domain, see Arcus et al. 2005.	UniProt_AC=O53779	Is_Pseudogene=No	virulence, detoxification, adaptation
Rv1113	1.25137	2.07916	5.3196e-05	0.00219224		Rv1113	1239416	1239613	+	vapB32	Possible antitoxin VapB32	Comments=Rv1113, (MTCY22G8.02), len: 65 aa. Possible vapB32, antitoxin, part of toxin-antitoxin (TA) operon with Rv1114, see Arcus et al. 2005. Similar to others in Mycobacterium tuberculosis e.g. Rv2758c|AL00896 7|MTV002.23 (88 aa) FASTA scores: opt: 97, E(): 0.86, (33.3% identity in 69 aa overlap). Part of family including Rv2871, Rv1241, Rv2132, Rv3321c, etc.	UniProt_AC=O06565	Is_Pseudogene=No	virulence, detoxification, adaptation
Rv1114	0.951952	2.55022	0.000173201	0.00555804		Rv1114	1239610	1239984	+	vapC32	Possible toxin VapC32. Contains PIN domain.	Comments=Rv1114, (MTCY22G8.03), len: 124 aa. Possible vapC32, toxin, part of toxin-antitoxin (TA) operon with Rv1113, contains PIN domain, see Arcus et al. 2005. Similar to others in Mycobacterium tuberculosis e.g. Rv1561 and Rv2010.	UniProt_AC=O06566	Is_Pseudogene=No	virulence, detoxification, adaptation
Rv1247c	0.896874	2.83927	0.000150723	0.0050869		Rv1247c	1388975	1389244	-	relB	Antitoxin RelB	Comments=Rv1247c, (MTV006.19c), len: 89 aa. RelB, antitoxin, part of toxin-antitoxin (TA) operon with Rv1246c (See Pandey and Gerdes, 2005), some similarity to hypothetical proteins including Mycobacterium tuberculosis proteins Rv2865|MTV003.11 (93 aa), FASTA scores: opt: 249, E(): 5.4e-13, (44.2% identity in 86 aa overlap)	UniProt_AC=O50462	Is_Pseudogene=No	virulence, detoxification, adaptation
Rv1908c	0.854178	6.45576	3.83365e-05	0.00170554		Rv1908c	2153889	2156111	-	katG	Catalase-peroxidase-peroxynitritase T KatG	Comments=Rv1908c, (MTCY180.10), len: 740 aa. KatG, catalase-peroxidase-peroxynitritase T (see citations below), HPI. FASTA results: Q57215 catalase-peroxidase from Mycobacterium tuberculosis (740 aa) opt: 5081, E(): 0, (100% identity in 740 aa overlap). Contains peroxidases active site signature (PS00436) and ATP/GTP-binding site motif A (P-loop	UniProt_AC=Q08129	Is_Pseudogene=No	virulence, detoxification, adaptation
Rv1955	0.955949	3.02301	0.000159334	0.00533155		Rv1955	2201719	2202096	+	higB	Possible toxin HigB	Comments=Rv1955, (MTCY09F9.09c), len: 125 aa. Possible higB, toxin, part of toxin-antitoxin (TA) operon with Rv1956 (See Pandey and Gerdes, 2005	UniProt_AC=P95259	Is_Pseudogene=No	virulence, detoxification, adaptation
Rv1956	1.08406	2.60693	4.2007e-05	0.00184617		Rv1956	2202138	2202587	+	higA	Possible antitoxin HigA	Comments=Rv1956, (MTCY09F9.08c), len: 149 aa. Possible higA, antitoxin, part of toxin-antitoxin (TA) operon with Rv1955 (See Pandey and Gerdes, 2005	UniProt_AC=P95258	Is_Pseudogene=No	virulence, detoxification, adaptation
Rv1962A	1.15164	2.12742	6.46149e-05	0.00252967		Rv1962A	2205277	2205549	-	vapB35	Possible antitoxin VapB35	Comments=Rv1962A, len: 90 aa. Possible vapB35, antitoxin, part of toxin-antitoxin (TA) operon with Rv1962c, see Arcus et al. 2005. Similar to others in M. tuberculosis e.g. Rv3385c, Rv3407, Rv0626	UniProt_AC=P0CW28	Is_Pseudogene=No	virulence, detoxification, adaptation
Rv1965	1.41015	1.00441	0.000726115	0.0170501		Rv1965	2208507	2209322	+	yrbE3B	Conserved hypothetical integral membrane protein YrbE3B	Comments=Rv1965, (MTV051.03), len: 271 aa. YrbE4B, hypothetical unknown integral membrane protein, part of mce3 operon and member of YrbE family (see citations below), highly similar to Mycobacterium tuberculosis proteins O07413|Rv0168|MTCI28.08|yrbE1B (289 aa), FASTA scores: opt: 937, E(): 0, (54.3% identity in 254 aa overlap)	UniProt_AC=O53966	Is_Pseudogene=No	virulence, detoxification, adaptation
Rv2009	-0.866668	3.01372	0.000401225	0.0109846		Rv2009	2258030	2258272	+	vapB15	Antitoxin VapB15	Comments=Rv2009, (MTCY39.08c), len: 80 aa. VapB15, antitoxin, part of toxin-antitoxin (TA) operon with Rv2010 (See Arcus et al., 2005	UniProt_AC=Q10848	Is_Pseudogene=No	virulence, detoxification, adaptation
Rv2031c	-3.12561	1.43771	8.00667e-07	5.4045e-05		Rv2031c	2278498	2278932	-	hspX	Heat shock protein HspX (alpha-crystallin homolog) (14 kDa antigen) (HSP16.3)	Comments=Rv2031c, (MTV018.18c), len: 144 aa. HspX, heat shock protein localized in the inner membrane (see citations below). Identical to P30223|14KD_MYCTU 14 KD antigen (16 kDa antigen) (HSP 16.3) of Mycobacterium tuberculosis (143 aa). Belongs to the small heat shock protein (HSP20) family. Also known as alpha-crystallin and gene as acr (see some citations below). Predicted possible vaccine can…	UniProt_AC=P0A5B7	Is_Pseudogene=No	virulence, detoxification, adaptation
Rv3176c	-1.09123	1.61953	0.000477775	0.0126385		Rv3176c	3544344	3545300	-	mesT	Probable epoxide hydrolase MesT (epoxide hydratase) (arene-oxide hydratase)	Comments=Rv3176c, (MTV014.20c), len: 318 aa. Probable mesT, epoxide hydrolase, similar to others e.g. O15007|PEG1|MEST|Q92571|O14973 MEST protein (mesoderm specific transcript (mouse) homolog) (similar to alpha/beta hydrolase fold) from Homo sapiens (Human) (335 aa), FASTA scores: opt: 348, E(): 6e-15, (32.15% identity in 280 aa overlap)	UniProt_AC=Q6MX03	Is_Pseudogene=No	virulence, detoxification, adaptation
Rv3269	-0.907311	4.26736	0.00296735	0.0478073		Rv3269	3650234	3650515	+	Rv3269	Conserved protein	Comments=Rv3269, (MTCY71.09), len: 93 aa. Conserved protein, similar to many Mycobacterium proteins and chaperonins/heat shock proteins e.g. Q9CCL0|ML0748 hypothetical protein from Mycobacterium leprae (92 aa), FASTA scores: opt: 427, E(): 6.8e-21, (73.65% identity in 91 aa overlap)	UniProt_AC=P96874	Is_Pseudogene=No	virulence, detoxification, adaptation
Rv3384c	0.739377	3.23238	0.00193534	0.0357391		Rv3384c	3799243	3799635	-	vapC46	Possible toxin VapC46. Contains PIN domain.	Comments=Rv3384c, (MTV004.42c), len: 130 aa. Possible vapC46, toxin, part of toxin-antitoxin (TA) operon with Rv3385c, contains PIN domain, see Arcus et al. 2005. Similar to others in Mycobacterium tuberculosis e.g. P95252|Rv1962c|MTCY09F9.02 (135 aa), FASTA scores: opt: 266, E(): 1.6e-10, (43.1% identity in 130 aa overlap)	UniProt_AC=O50411	Is_Pseudogene=No	virulence, detoxification, adaptation
Rv3385c	0.676206	4.01455	0.00151157	0.0299046		Rv3385c	3799635	3799943	-	vapB46	Possible antitoxin VapB46	Comments=Rv3385c, (MTV004.43c), len: 102 aa. Possible vapB46, antitoxin, part of toxin-antitoxin (TA) operon with Rv3386c, see Arcus et al. 2005. Similar to others in Mycobacterium tuberculosis hypothetical proteins e.g. Q50718|Y09M_MYCTU|MTCY78.21c|Rv3407|MT3515 (99 aa), FASTA scores: opt: 155, E(): 0.001, (41.05% identity in 78 aa overlap)	UniProt_AC=O50412	Is_Pseudogene=No	virulence, detoxification, adaptation
Rv3417c	0.989613	6.12769	9.78009e-06	0.000524508		Rv3417c	3835272	3836891	-	groEL1	60 kDa chaperonin 1 GroEL1 (protein CPN60-1) (GroEL protein 1)	Comments=Rv3417c, (MTCY78.12), len: 539 aa. GroEL1 (alternate genbe name: cpn60_1), 60 kDa chaperonin 1 (protein cpn60 1) (see citations below), equivalent to P37578|CH61_MYCLE|B1620_C3_228|GROL1|GROEL1|GROEL-1|GROE1|ML0381|B229_ 60 KDA chaperonin 1 from Mycobacterium leprae (537 aa), FASTA scores: opt: 2846, E(): 1.5e-154, (82.95% identity in 539 aa overlap). Also highly similar to others e.g. Q…	UniProt_AC=P0A518	Is_Pseudogene=No	virulence, detoxification, adaptation
Rv3418c	2.07381	7.17098	3.86927e-17	9.46761e-15		Rv3418c	3836986	3837288	-	groES	10 kDa chaperonin GroES (protein CPN10) (protein GroES) (BCG-a heat shock protein) (10 kDa antigen)	Comments=Rv3418c, (MTCY78.11), len: 100 aa. GroES (alternate gene names: cpn10, mpt57), 10 kDa chaperonin (protein cpn10) (see citations below), equivalent to P24301|CH10_MYCLE|MOPB|GROES|CHPA|ML0380|B1620_C3_227|B229_C3_247 from Mycobacterium leprae (99 aa), FASTA scores: opt: 568, E(): 2.1e-31, (89.9% identity in 99 aa overlap). And also strongly identical to others e.g. O86017|CH10_MYCAV|MOPB|…	UniProt_AC=P09621	Is_Pseudogene=No	virulence, detoxification, adaptation
Rv3617	1.05921	3.86957	2.10711e-07	1.61752e-05		Rv3617	4057733	4058701	+	ephA	Probable epoxide hydrolase EphA (epoxide hydratase) (arene-oxide hydratase)	Comments=Rv3617, (MTCY07H7B.05c, MTCY15C10.35c), len: 322 aa. Probable ephA, epoxide hydrolase (see citation below), similar to many e.g. Q9A8W9|CC1229 from Caulobacter crescentus (330 aa), FASTA scores: opt: 965, E(): 1.8e-51, (46.15% identity in 323 aa overlap)	UniProt_AC=O06266	Is_Pseudogene=No	virulence, detoxification, adaptation
Rv3660c	-0.902421	2.53283	0.000673902	0.0163871		Rv3660c	4098096	4099148	-	Rv3660c	Conserved hypothetical protein	Comments=Rv3660c, (MTV025.008c), len: 350 aa. Conserved hypothetical protein, similar to O33612 protein concerned in inhibition of morphological differentiation in Streptomyces azureus from Streptomyces cyaneus (Streptomyces curacoi) (370 aa), FASTA scores: opt: 655, E(): 5.9e-31, (42.2% identity in 315 aa overlap)	UniProt_AC=O69628	Is_Pseudogene=No	virulence, detoxification, adaptation
Rv3759c	-0.661537	4.30647	0.000434722	0.0116571		Rv3759c	4204426	4205373	-	proX	Possible osmoprotectant (glycine betaine/carnitine/choline/L-proline) binding lipoprotein ProX	Comments=Rv3759c, (MTV025.107c), len: 315 aa. Possible proX, osmoprotectant-binding lipoprotein component of osmoprotectant transport system (see citation below), similar to osmoprotection proteins (proX) involved in glycine betaine/L-proline/choline transport, e.g. AAK79442|CAC1474 proline/glycine betaine ABC transport system periplasmic component from Clostridium acetobutylicum (303 aa), FASTA …	UniProt_AC=O69725	Is_Pseudogene=No	virulence, detoxification, adaptation
Rv2975a	0.773185	3.62673	0.00103808	0.0228319
RVnc0002	-1.50509	6.59249	1.76449e-12	3.13998e-10
RVnc0004	-1.29455	3.30498	1.27144e-09	1.5084e-07
RVnc0018	0.974029	3.4395	3.24224e-06	0.000191522
																					dehydrogese(PC00092)

## Sheet: Sheet2
List of differentially expressed genes in untreated rv0158 KO Mtb relative to untreated wild-type Mtb (FDR< 0.05, fold change>2)
KO_UT vs WT_UT	logFC	logCPM	PValue	FDR		LOCUS TAG	START SITE	END SITE	STRAND	GENE	PRODUCT	COMMENT			FUNCTIONAL CATEGORY
Rv0976c	3.17396	4.24891	2.56474e-43	1.0041e-39		Rv0976c	1088493	1090175	-	Rv0976c	Conserved hypothetical protein	Comments=Rv0976c, (MTV044.04c), len: 560 aa. Conserved hypothetical protein, highly similar to others e.g. CAB95890.1|AL359988 conserved hypothetical protein from Streptomyces coelicolor (558 aa)	UniProt_AC=O86320	Is_Pseudogene=No	conserved hypotheticals		SUBFAMILY NOT MED (PTHR43130:SF6)
Rv0159c	2.94957	6.112	9.94893e-41	1.29834e-37		Rv0159c	187433	188839	-	PE3	PE family protein PE3	Comments=Rv0159c, (MTV032.02c), len: 468 aa. PE3, Member of the Mycobacterium tuberculosis PE family (see citation below), similar to many other PE proteins e.g. O06828 from Mycobacterium tuberculosis (528 aa), FASTA scores: opt: 1163, E(): 0, (45.8% identity in 467 aa overlap). Also highly similar to upstream MTV032_3, and to MTCI5_25, MTCI5_26, MTV049_ 21, MTCY1A10_26, etc.	UniProt_AC=Q79G04	Is_Pseudogene=No	PE/PPE
Rv2724c	2.90753	6.7274	5.24097e-42	1.02592e-38		Rv2724c	3036131	3037291	-	fadE20	Probable acyl-CoA dehydrogenase FadE20	Comments=Rv2724c, (MTCY154.04c), len: 386 aa. Probable fadE20, acyl-CoA dehydrogenase, highly similar to many e.g. Q9X7Y2|SC6A5.36 from Streptomyces coelicolor (382 aa), FASTA scores: opt: 1583, E(): 6.9e-94, (62.7% identity in 378 aa overlap)	UniProt_AC=O33229	Is_Pseudogene=No	lipid metabolism
Rv0974c	2.76463	4.43934	3.35073e-39	3.27953e-36		Rv0974c	1085756	1087345	-	accD2	Probable acetyl-/propionyl-CoA carboxylase (beta subunit) AccD2	Comments=Rv0974c, (MTV044.02c), len: 529 aa. Probable accD2, acetyl-/propionyl-CoA carboxylase (beta subunit), highly similar to many e.g. CAB95891.1|AL35998 putative acetyl/propionyl CoA carboxylase beta subunit from Streptomyces coelicolor (532 aa)	UniProt_AC=O86318	Is_Pseudogene=No	lipid metabolism
Rv0972c	2.60786	4.85852	3.2755e-34	2.13727e-31		Rv0972c	1082584	1083750	-	fadE12	Acyl-CoA dehydrogenase FadE12	Comments=Rv0972c, (MTCY10D7.02), len: 388 aa. fadE12, acyl-CoA dehydrogenase, highly similar to many e.g. CAB95893.1|AL359988 putative acyl CoA dehydrogenase from Streptomyces coelicolor (382 aa)	UniProt_AC=P71539	Is_Pseudogene=No	lipid metabolism
Rv0973c	2.58753	4.99322	2.36649e-35	1.85296e-32		Rv0973c	1083747	1085750	-	accA2	Probable acetyl-/propionyl-coenzyme A carboxylase alpha chain (alpha subunit) AccA2: biotin carboxylase + biotin carboxyl carrier protein (BCCP)	Comments=Rv0973c, (MTV044.01c, MTCY10D7.01), len: 667 aa. Probable accA2 (alternate gene name: bccA), acetyl-/propionyl-coenzyme A carboxylase (alpha subunit) [includes: biotin carboxylase	UniProt_AC=P71538	Is_Pseudogene=No	lipid metabolism
Rv0975c	2.48931	4.1719	3.90801e-31	2.18569e-28		Rv0975c	1087348	1088496	-	fadE13	Probable acyl-CoA dehydrogenase FadE13	Comments=Rv0975c, (MTV044.03c), len: 382 aa. Probable fadE13, acyl-CoA dehydrogenase, highly similar to many e.g. T35427 probable acyl-CoA dehydrogenase from Streptomyces coelicolor (382 aa)	UniProt_AC=O86319	Is_Pseudogene=No	lipid metabolism
Rv0859	2.38889	7.23466	4.70834e-31	2.30414e-28		Rv0859	955077	956288	+	fadA	Possible acyl-CoA thiolase FadA	Comments=Rv0859, (MTV043.52), len: 403 aa. Possible fadA, acyl-CoA thiolase, equivalent to NP_302423.1|NC_002677 putative beta-ketoadipyl CoA thiolase from Mycobacterium leprae (403 aa). Also highly similar to acyl/acetyl-CoA thiolases and beta-ketoadipyl CoA thiolases, e.g. T35428 probable acetyl CoA acetyltransferase (thiolase) from Streptomyces coelicolor (404 aa)	UniProt_AC=O53871	Is_Pseudogene=No	lipid metabolism
Rv2452c	2.26395	1.09541	1.81584e-07	1.4218e-05		Rv2452c	2752848	2752994	-	Rv2452c	Hypothetical protein	Comments=Rv2452c, (MTV008.08c), len: 48 aa. Hypothetical unknown protein (see citation below).	UniProt_AC=O53179	Is_Pseudogene=No	conserved hypotheticals
Rv0860	2.261	8.36809	6.69184e-30	2.91095e-27		Rv0860	956293	958455	+	fadB	Probable fatty oxidation protein FadB	Comments=Rv0860, (MTV043.53), len: 720 aa. Probable fadB, fatty oxidation protein, equivalent to NP_302422.1|NC_002677 putative fatty oxidation complex alpha subunit from Mycobacterium leprae (714 aa). Also highly similar to others and various proteins involved in fatty acid metabolism, e.g. T35429 probable fatty oxidation protein from Streptomyces coelicolor (733 aa)	UniProt_AC=O53872	Is_Pseudogene=No	lipid metabolism
Rv0440	2.16941	9.21079	1.45552e-19	5.18034e-17		Rv0440	528608	530230	+	groEL2	60 kDa chaperonin 2 GroEL2 (protein CPN60-2) (GroEL protein 2) (65 kDa antigen) (heat shock protein 65) (cell wall protein A) (antigen A)	Comments=Rv0440, (MTV037.04), len: 540 aa. GroEL2 (alternate gene names: groL2, groEL-2, hsp65, hsp60), 60 kDa chaperonin 2 (see Shinnick 1987). Purified 65 kDa antigen can elicit a strong delayed-type hypersensitivity reaction in experimental animals infected with M. tuberculosis. This protein is one of the major immunoreactive proteins of the mycobacteria. This antigen contains epitopes that ar…	UniProt_AC=P0A520	Is_Pseudogene=No	virulence, detoxification, adaptation
Rv3418c	2.07381	7.17098	3.86927e-17	9.46761e-15		Rv3418c	3836986	3837288	-	groES	10 kDa chaperonin GroES (protein CPN10) (protein GroES) (BCG-a heat shock protein) (10 kDa antigen)	Comments=Rv3418c, (MTCY78.11), len: 100 aa. GroES (alternate gene names: cpn10, mpt57), 10 kDa chaperonin (protein cpn10) (see citations below), equivalent to P24301|CH10_MYCLE|MOPB|GROES|CHPA|ML0380|B1620_C3_227|B229_C3_247 from Mycobacterium leprae (99 aa), FASTA scores: opt: 568, E(): 2.1e-31, (89.9% identity in 99 aa overlap). And also strongly identical to others e.g. O86017|CH10_MYCAV|MOPB|…	UniProt_AC=P09621	Is_Pseudogene=No	virulence, detoxification, adaptation
Rv3639c	1.81451	0.197802	0.00244165	0.0419258		Rv3639c	4077884	4078450	-	Rv3639c	Conserved hypothetical protein	Comments=Rv3639c, (MTCY15C10.13), len: 188 aa. Hypothetical protein, with C-terminus highly similar to N-terminus of P95044|Rv0698|MTCY210.15 hypothetical 22.3 KDA protein from Mycobacterium tuberculosis (203 aa), FASTA scores: opt: 224, E(): 4.5e-07, (54.8% identity in 73 aa overlap).	UniProt_AC=O06368	Is_Pseudogene=No	conserved hypotheticals
Rv2816c	1.79465	4.43438	9.79288e-19	3.19493e-16		Rv2816c	3123625	3123966	-	Rv2816c	Conserved hypothetical protein	Comments=Rv2816c, (MTCY16B7.27), len: 113 aa. Conserved hypothetical protein, highly similar in part to N-terminus of several proteins e.g. O28403|AF1876 conserved hypothetical protein from Archaeoglobus fulgidus (94 aa), FASTA scores: opt: 137, E(): 0.0022, (47.55% identity in 61 aa overlap)	UniProt_AC=P71637	Is_Pseudogene=No	conserved hypotheticals
Rv2934	1.73513	6.3374	1.5703e-16	3.6163e-14		Rv2934	3262248	3267731	+	ppsD	Phenolpthiocerol synthesis type-I polyketide synthase PpsD	Comments=Rv2934, (MTCY19H9.02), len: 1827 aa. PpsD, type-I polyketide synthase (see citations below), highly similar to others from Mycobacterium leprae e.g. Q9CB70|ML2354 polyketide synthase (1822 aa), FASTA scores: opt: 9779, E(): 0, (80.35% identity in 1836 aa overlap)	UniProt_AC=P96203	Is_Pseudogene=No	lipid metabolism
Rv0971c	1.71187	3.6793	1.77512e-14	3.65768e-12		Rv0971c	1081775	1082584	-	echA7	Probable enoyl-CoA hydratase EchA7 (enoyl hydrase) (unsaturated acyl-CoA hydratase) (crotonase)	Comments=Rv0971c, (MTCY10D7.03), len: 269 aa. Probable echA7, enoyl-CoA hydratase, similar to many e.g. CAB95895.1|AL359988 putative enoyl CoA hydratase from Streptomyces coelicolor (247 aa)	UniProt_AC=P71540	Is_Pseudogene=No	lipid metabolism
Rv1657	1.43937	1.02886	0.000646442	0.0160179		Rv1657	1870842	1871354	+	argR	Probable arginine repressor ArgR (AHRC)	Comments=Rv1657, (MTCY06H11.22), len: 170 aa. Probable argR, Arginine repressor (alternate gene name: ahrC). Similar to AHRC_BACSU|P17893 arginine hydroximate resistance protein from Bacillus subtilis (149 aa), FASTA scores: opt: 283, E(): 1.8e-11, (34.5% identity in 142 aa overlap)	UniProt_AC=P0A4Y8	Is_Pseudogene=No	regulatory proteins
Rv1965	1.41015	1.00441	0.000726115	0.0170501		Rv1965	2208507	2209322	+	yrbE3B	Conserved hypothetical integral membrane protein YrbE3B	Comments=Rv1965, (MTV051.03), len: 271 aa. YrbE4B, hypothetical unknown integral membrane protein, part of mce3 operon and member of YrbE family (see citations below), highly similar to Mycobacterium tuberculosis proteins O07413|Rv0168|MTCI28.08|yrbE1B (289 aa), FASTA scores: opt: 937, E(): 0, (54.3% identity in 254 aa overlap)	UniProt_AC=O53966	Is_Pseudogene=No	virulence, detoxification, adaptation
Rv1130	1.33614	4.1941	2.71637e-05	0.00128128		Rv1130	1254555	1256135	+	prpD	Possible methylcitrate dehydratase PrpD	Comments=Rv1130, (MTCY22G8.19), len: 526 aa. Possible prpD, methylcitrate dehydratase (MCD), some similarity to AP000063|AP000063_192 hypothetical protein from Aeropyrum pernix (479 aa), FASTA scores: opt: 717, E(): 0, (34.3% identity in 443 a a overlap), and to PRPD_ECOLI|P77243 prpd protein from Escherichia coli (483aa), FASTA scores: opt: 234, E(): 3.3e-08, (27.0% identity in 429 aa overlap). …	UniProt_AC=O06582	Is_Pseudogene=No	intermediary metabolism and respiration
Rv0467	1.31823	4.95151	1.96626e-09	2.19941e-07		Rv0467	557527	558813	+	icl1	Isocitrate lyase Icl (isocitrase) (isocitratase)	Comments=Rv0467, (MTV038.11), len: 428 aa. Icl1, isocitrate lyase (see citations below), highly similar to many, closest to Z29367|RFISCILY_1 from R. fascians (429 aa), FASTA scores: opt: 2359, E(): 0, (80.7% identity in 429 aa overlap). Belongs to the isocitrate lyase family. Has 2-methyl-isocitrate lyase (MCL) activity in M. tuberculosis Erdman (See Munoz-Elias et al., 2006	UniProt_AC=P0A5H3	Is_Pseudogene=No	intermediary metabolism and respiration
Rv1113	1.25137	2.07916	5.3196e-05	0.00219224		Rv1113	1239416	1239613	+	vapB32	Possible antitoxin VapB32	Comments=Rv1113, (MTCY22G8.02), len: 65 aa. Possible vapB32, antitoxin, part of toxin-antitoxin (TA) operon with Rv1114, see Arcus et al. 2005. Similar to others in Mycobacterium tuberculosis e.g. Rv2758c|AL00896 7|MTV002.23 (88 aa) FASTA scores: opt: 97, E(): 0.86, (33.3% identity in 69 aa overlap). Part of family including Rv2871, Rv1241, Rv2132, Rv3321c, etc.	UniProt_AC=O06565	Is_Pseudogene=No	virulence, detoxification, adaptation
Rv2822c	1.21242	1.97825	0.000122793	0.00441039		Rv2822c	3128973	3129347	-	Rv2822c	Hypothetical protein	Comments=Rv2822c, (MTCY16B7.20), len: 124 aa. Hypothetical unknown protein. This region is a possible MT-complex-specific genomic island (See Becq et al., 2007).	UniProt_AC=P71630	Is_Pseudogene=No	conserved hypotheticals
Rv2723	1.21095	5.06881	1.99228e-10	2.78564e-08		Rv2723	3034909	3036102	+	Rv2723	Probable conserved integral membrane protein	Comments=Rv2723, (MTCY154.03), len: 397 aa. Probable conserved integral membrane protein, highly similar to others e.g. Q9Z503|SCC54.23c putative integral membrane export protein from Streptomyces coelicolor (333 aa), FASTA scores: opt: 883, E(): 2.4e-48, (46.4% identity in 332 aa overlap)	UniProt_AC=P0A614	Is_Pseudogene=No	cell wall and cell processes
Rv1962A	1.15164	2.12742	6.46149e-05	0.00252967		Rv1962A	2205277	2205549	-	vapB35	Possible antitoxin VapB35	Comments=Rv1962A, len: 90 aa. Possible vapB35, antitoxin, part of toxin-antitoxin (TA) operon with Rv1962c, see Arcus et al. 2005. Similar to others in M. tuberculosis e.g. Rv3385c, Rv3407, Rv0626	UniProt_AC=P0CW28	Is_Pseudogene=No	virulence, detoxification, adaptation
Rv3406	1.14509	1.62396	0.00125361	0.0261059		Rv3406	3825330	3826217	+	Rv3406	Probable dioxygenase	Comments=Rv3406, (MTCY78.22c), len: 295 aa. Probable dioxygenase, highly similar to Q9WWU|ATSK putative alpha-ketoglutarate dependent dioxygenase from Pseudomonas putida (301 aa), FASTA scores: opt: 994, E(): 3.9e-57, (53.7% identity in 283 aa overlap)	UniProt_AC=P65075	Is_Pseudogene=No	intermediary metabolism and respiration
Rv1131	1.10989	4.23341	0.000139982	0.0048498		Rv1131	1256132	1257313	+	prpC	Probable methylcitrate synthase PrpC	Comments=Rv1131, (MTCY22G8.20), len: 393 aa. Probable prpC, methylcitrate synthase (MCS) (previously known as gltA1) , highly similar to CISY_MYCSM|P26491 citrate synthase from Mycobacterium smegmatis (375 aa), FASTA scores: opt:1942, E(): 0, (80.0% identity in 375 aa overlap). Also similar to two other M. tuberculosis citrate synthases, Rv0896c|MTCY31.24|gltA2 (431 aa), FASTA score: (33.1% ident…	UniProt_AC=O08395	Is_Pseudogene=No	intermediary metabolism and respiration
Rv0077c	1.09692	1.84369	0.0020616	0.0373752		Rv0077c	85636	86466	-	Rv0077c	Probable oxidoreductase	Comments=Rv0077c, (MTV030.21c), len: 276 aa. Possible oxidoreductase, weakly similar to others from Streptomyces. Also similar to MTCY05A6_35 and MTCY1A11_10 from Mycobacterium tuberculosis. And shows some similarity in part with AAL17935.1|AY054120 putative epoxide hydrolase from Mycobacterium smegmatis (203 aa).	UniProt_AC=O53622	Is_Pseudogene=No	intermediary metabolism and respiration
Rv1956	1.08406	2.60693	4.2007e-05	0.00184617		Rv1956	2202138	2202587	+	higA	Possible antitoxin HigA	Comments=Rv1956, (MTCY09F9.08c), len: 149 aa. Possible higA, antitoxin, part of toxin-antitoxin (TA) operon with Rv1955 (See Pandey and Gerdes, 2005	UniProt_AC=P95258	Is_Pseudogene=No	virulence, detoxification, adaptation
Rv2817c	1.07921	5.63918	1.27749e-07	1.04063e-05		Rv2817c	3123967	3124983	-	Rv2817c	Conserved hypothetical protein	Comments=Rv2817c, (MTCY16B7.26), len: 338 aa. Conserved hypothetical protein, showing similarity with O30236|AF2435 conserved hypothetical protein from Archaeoglobus fulgidus (322 aa), FASTA scores: opt: 397, E(): 2.4e-19, (28.2% identity in 298 aa overlap)	UniProt_AC=P71636	Is_Pseudogene=No	conserved hypotheticals
Rv3618	1.07827	4.10716	2.45257e-08	2.40045e-06		Rv3618	4058698	4059885	+	Rv3618	Possible monooxygenase	Comments=Rv3618, (MTCY15C10.34c, MTCY07H7B.04c), len: 395 aa. Possible monooxygenase, similar to others (principally bacterial luciferases alpha chain) e.g. Q9JN87|MMYO putative alkanal monooxygenase from Streptomyces coelicolor (373 aa), FASTA scores: opt: 949, E(): 8.9e-54, (41.7% identity in 374 aa overlap)	UniProt_AC=O07914	Is_Pseudogene=No	intermediary metabolism and respiration
Rv3617	1.05921	3.86957	2.10711e-07	1.61752e-05		Rv3617	4057733	4058701	+	ephA	Probable epoxide hydrolase EphA (epoxide hydratase) (arene-oxide hydratase)	Comments=Rv3617, (MTCY07H7B.05c, MTCY15C10.35c), len: 322 aa. Probable ephA, epoxide hydrolase (see citation below), similar to many e.g. Q9A8W9|CC1229 from Caulobacter crescentus (330 aa), FASTA scores: opt: 965, E(): 1.8e-51, (46.15% identity in 323 aa overlap)	UniProt_AC=O06266	Is_Pseudogene=No	virulence, detoxification, adaptation
Rv1958c	1.04702	3.58526	3.43054e-07	2.53407e-05		Rv1958c	2203018	2203632	-	Rv1958c	Hypothetical protein	Comments=Rv1958c, (MTCY09F9.06), len: 204 aa. Hypothetical unknown protein, questioble ORF	UniProt_AC=P95256	Is_Pseudogene=No	conserved hypotheticals
Rv2301	1.03575	3.23828	1.48787e-05	0.000746795		Rv2301	2573015	2573707	+	cut2	Probable cutinase Cut2	Comments=Rv2301, (MTCY339.08c), len: 230 aa. Probable cut2 (alternate gene name: cfp25), cutinase, highly similar to others from Mycobacteria tuberculosis e.g. MTCY13E12.04|Rv3451|O06318|CUT3_MYCTU (247 aa), FASTA scores: opt: 569, E(): 2.3e-27, (45.3% identity in 223 aa overlap)	UniProt_AC=P63881	Is_Pseudogene=No	cell wall and cell processes
Rv2638	1.03071	2.78301	5.42268e-05	0.00221144		Rv2638	2964405	2964851	+	Rv2638	Conserved hypothetical protein	Comments=Rv2638, (MTCY441.08), len: 148 aa. Conserved hypothetical protein, similar in part to Q9WVX8|RSBV_STRCO|bldg|SCH5.12c anti-sigma B factor antagonist from Streptomyces coelicolor (113 aa), FASTA scores: opt: 162, E(): 0.00066, (31.8% identity in 110 aa overlap)	UniProt_AC=P71937	Is_Pseudogene=No	conserved hypotheticals
Rv2382c	1.01011	2.34636	0.000757364	0.0175449		Rv2382c	2670269	2671603	-	mbtC	Polyketide synthetase MbtC (polyketide synthase)	Comments=Rv2382c, (MTCY22H8.03), len: 444 aa. MbtC, polyketide synthase (see citations below), similar in part to several synthases e.g. Q9F7T9 avermectin polyketide synthase (fragment) from Streptomyces avermitilis (3626 aa), FASTA scores: opt: 1458, E(): 7e-82, (50.65% identity in 446 aa overlap)	UniProt_AC=P71718	Is_Pseudogene=No	lipid metabolism
Rv3337	-1.01992	3.92021	7.5688e-08	6.73451e-06		Rv3337	3723656	3724042	+	Rv3337	Conserved hypothetical protein	Comments=Rv3337, (MTV016.37), len: 128 aa. Conserved hypothetical protein, equivalent to N-terminus of Q49926|ML0685 TPEA (putative hydrolase) from Mycobacterium leprae (303 aa), FASTA scores: opt: 362, E(): 5.7e-17, (74.3% identity in 70 aa overlap). Also weak similarity in N-terminus to Q98JT7|BAB49078|MLR1789 probable epoxide hydrolase from Rhizobium loti (Mesorhizobium loti) (300 aa), FASTA s…	UniProt_AC=O53387	Is_Pseudogene=No	conserved hypotheticals
Rv1595	-1.04001	6.83897	9.98415e-08	8.31659e-06		Rv1595	1795805	1797388	+	nadB	Probable L-aspartate oxidase NadB	Comments=Rv1595, (MTCY336.09c), len: 527 aa. Probable nadB, L-aspartate oxidase. Similar to many e.g. Q49617 L-aspartate oxidase (quinolinate synthetase) from Mycobacterium leprae (424 aa), FASTA results: opt: 2152, E(): 0, (82.0% identity in 400 aa overlap). Also shows some similarity to Rv1552 frdA from Mycobacterium tuberculosis (583 aa), FASTA results: E(): 1e-10, (35.3% identity in 566 aa ov…	UniProt_AC=P65499	Is_Pseudogene=No	intermediary metabolism and respiration
Rv3127	-1.06086	2.10386	0.000161131	0.005346		Rv3127	3492147	3493181	+	Rv3127	Conserved protein	Comments=Rv3127, (MTCY164.37), len: 344 aa. Conserved protein, highly similar to Mycobacterium tuberculosis protein O53476|Rv2032|MTV018.19 (331 aa), FASTA scores: opt: 1212, E(): 6e-69, (56.7% identity in 321 aa overlap), and also similar to P95195|MTCY03A2.27c (332 aa), FASTA scores: opt: 521, E(): 1.6e-25	UniProt_AC=O05800	Is_Pseudogene=No	conserved hypotheticals
Rv1265	-1.06532	5.0209	8.76723e-07	5.81757e-05		Rv1265	1413260	1413940	+	Rv1265	Unknown protein	Comments=Rv1265, (MTCY50.17c), len: 226 aa. Unknown protein (see citation below).	UniProt_AC=P64789	Is_Pseudogene=No	conserved hypotheticals
Rv1198	-1.06901	7.13635	1.24417e-06	7.85631e-05		Rv1198	1341006	1341290	+	esxL	Putative ESAT-6 like protein EsxL (ESAT-6 like protein 4)	Comments=Rv1198, (MT1236, MTCI364.10), len: 94 aa. EsxL, ESAT-6 like protein (see citation below). Member of the ESAT-6 family with Rv3619c, Rv1037c, etc. Almost identical to MTCY10G2.12 (94 aa) (97.9% identity in 94 aa overlap) and MTCY98.022c (94 aa) (94.7% identity in 94 aa overlap). Highly similar to Q49946|U1756D Mycobacterium leprae (95 aa), FASTA scores: opt: 403, E(): 1.1e-22, (64.1% iden…	UniProt_AC=O05300	Is_Pseudogene=No	cell wall and cell processes
Rv3176c	-1.09123	1.61953	0.000477775	0.0126385		Rv3176c	3544344	3545300	-	mesT	Probable epoxide hydrolase MesT (epoxide hydratase) (arene-oxide hydratase)	Comments=Rv3176c, (MTV014.20c), len: 318 aa. Probable mesT, epoxide hydrolase, similar to others e.g. O15007|PEG1|MEST|Q92571|O14973 MEST protein (mesoderm specific transcript (mouse) homolog) (similar to alpha/beta hydrolase fold) from Homo sapiens (Human) (335 aa), FASTA scores: opt: 348, E(): 6e-15, (32.15% identity in 280 aa overlap)	UniProt_AC=Q6MX03	Is_Pseudogene=No	virulence, detoxification, adaptation
Rv1094	-1.09133	8.05324	2.89733e-07	2.18136e-05		Rv1094	1221959	1222786	+	desA2	Possible acyl-[acyl-carrier protein] desaturase DesA2 (acyl-[ACP] desaturase) (stearoyl-ACP desaturase)	Comments=Rv1094, (MTV017.47), len: 275 aa. Possible desA2, acyl-[acyl-carrier protein] desaturase (stearoyl-ACP desaturase), equivalent to AL049491|MLCB1222_15 from Mycobacterium leprae (275 aa), FASTA score: (78.1% identity in 274 aa overlap). Also weakly similar to plant stearoyl-acyl carrier protein desaturases, and very similar to U49839|MTV043.16C|Rv0824c enzyme desA1 from Mycobacterium tube…	UniProt_AC=O53442	Is_Pseudogene=No	lipid metabolism
Rv2591	-1.09229	4.4817	9.48343e-08	8.07122e-06		Rv2591	2921551	2923182	+	PE_PGRS44	PE-PGRS family protein PE_PGRS44	Comments=Rv2591, (MTCY227.10c), len: 543 aa. PE_PGRS44, Member of the Mycobacterium tuberculosis PE family, PGRS subfamily of gly-rich proteins (see citation below), highly similar to others e.g. O53845|Rv0834c|MTV043.26c from Mycobacterium tuberculosis (882 aa), FASTA scores: opt: 1813, E(): 5.8e-66, (55.3% identity in 568 aa overlap). Equivalent to AAK46982 from Mycobacterium tuberculosis strai…	UniProt_AC=Q50630	Is_Pseudogene=No	PE/PPE
Rv1593c	-1.10773	2.91383	6.3064e-07	4.40885e-05		Rv1593c	1793997	1794707	-	Rv1593c	Conserved protein	Comments=Rv1593c, (MTCY336.11), len: 236 aa. Conserved protein, highly similar to Q49628|B1170_F1_44 from Mycobacterium leprae (286 aa), FASTA scores: opt: 1304, E (): 0, (85.4% identity in 233 aa overlap)	UniProt_AC=O06597	Is_Pseudogene=No	conserved hypotheticals
Rv2988c	-1.12169	6.17819	1.32441e-08	1.32951e-06		Rv2988c	3344654	3346075	-	leuC	Probable 3-isopropylmalate dehydratase (large subunit) LeuC (isopropylmalate isomerase) (alpha-IPM isomerase) (IPMI)	Comments=Rv2988c, (MTV012.02c), len: 473 aa. Probable leuC, 3-isopropylmalate dehydratase, large subunit, equivalent to O33123|LEU2_MYCLE 3-isopropylmalate dehydratase small subunit from Mycobacterium leprae (476 aa), FASTA scores: opt: 2818, E(): 1.3e-171, (88.75% identity in 471 aa overlap). Also highly similar to many e.g. Q44427|LEU2_ACTTI from Actinoplanes teichomyceticus (485 aa), FASTA sco…	UniProt_AC=O53237	Is_Pseudogene=No	intermediary metabolism and respiration
Rv1195	-1.14136	6.87701	6.23092e-07	4.40885e-05		Rv1195	1339003	1339302	+	PE13	PE family protein PE13	Comments=Rv1195, (MTCI364.07), len: 99 aa. PE13, Member of Mycobacterium tuberculosis PE family (see Brennan & Delogu 2002), e.g. Y0DP_MYCTU|Q50615 hypothetical glycine-rich 40.8 kd protein (498 aa), FASTA scores: opt: 307, E(): 1.4e-12, (56.3% identity in 96 aa overlap), similar to MTCY21C12.10c (99 aa), FASTA scores: opt:295, E(): 1.9e-11, (51.5% identity in 97 aa overlap).	UniProt_AC=Q79FR3	Is_Pseudogene=No	PE/PPE
Rv1196	-1.18189	8.1754	3.37372e-08	3.14479e-06		Rv1196	1339349	1340524	+	PPE18	PPE family protein PPE18	Comments=Rv1196, (MTCI364.08), len: 391 aa. PPE18 (alternate gene name: mtb39a). Member of the Mycobacterium tuberculosis PPE family of glycine-rich proteins, highly similar to others e.g. Y07P_MYCTU|Q11031 hypothetical 40.0 kDa protein cy02b10.25c (396 aa), FASTA scores: opt: 2124, E(): 0, (85.1% identity in 397 aa overlap). Note that expression of Rv1196 was demonstrated in lysates by immunodet…	UniProt_AC=Q7D8M9	Is_Pseudogene=No	PE/PPE
Rv1596	-1.20583	6.58133	4.67563e-10	6.3121e-08		Rv1596	1797388	1798245	+	nadC	Probable nicotinate-nucleotide pyrophosphatase NadC	Comments=Rv1596, (MTCY336.08c), len: 285 aa. Probable nadC, nicotinate-nucleotide pyrophosphatase O06594. Similar to many e.g. ADC_MYCLE|P46714 from Mycobacterium leprae (284 aa), FASTA results: opt: 1418, E(): 0,(79.2% identity in 283 aa overlap). Belongs to the NADC/MODD family.	UniProt_AC=O06594	Is_Pseudogene=No	intermediary metabolism and respiration
Rv1227c	-1.2064	0.946274	0.00128217	0.0262811		Rv1227c	1370292	1370825	-	Rv1227c	Probable transmembrane protein	Comments=Rv1227c, (MTCI61.10c), len: 177 aa. Possible transmembrane protein, similar to P96615 hypothetical protein ydbS from Bacillus subtilis (159 aa), fasta scores: E(): 3.6e-07, (30.1% identity in 163 aa overlap).	UniProt_AC=O33223	Is_Pseudogene=No	cell wall and cell processes
Rv3228	-1.20658	5.05864	2.77378e-08	2.64862e-06		Rv3228	3604726	3605718	+	Rv3228	Conserved hypothetical protein	Comments=Rv3228, (MTCY20B11.03), len: 330 aa. Conserved hypothetical protein, equivalent to Q9CCI4|ML0791 hypothetical protein from Mycobacterium leprae (327 aa), FASTA scores: opt: 1828, E(): 1e-98, (84.0% identity in 331 aa overlap). Also similar to several hypothetical bacterial proteins e.g. Q9K4A8|SC7E4.08c from Streptomyces coelicolor (337 aa), FASTA scores: opt: 1051, E(): 1e-53, (52.65% i…	UniProt_AC=O05873	Is_Pseudogene=No	conserved hypotheticals
Rv3855	-1.21138	3.28301	4.96097e-08	4.51679e-06		Rv3855	4327549	4328199	+	ethR	Transcriptional regulatory repressor protein (TetR-family) EthR	Comments=Rv3855, (MTCY01A6.13c), len: 216 aa. EthR (alternate gene names: aka, etaR), regulatory protein TetR family, involved in ethionamide sensitivity/resistance, negatively controls neighbouring ethA (Rv3854c, MTCY01A6.14	UniProt_AC=P96222	Is_Pseudogene=No	regulatory proteins
Rv3854c	-1.21406	6.45515	1.19164e-08	1.2277e-06		Rv3854c	4326004	4327473	-	ethA	Monooxygenase EthA	Comments=Rv3854c, (MTCY01A6.14), len: 489 aa. EthA (alternate gene names: aka, etaA), monooxygenase required for activation of the pro-drug ethionamide (see citations below), highly similar to other monooxygenases e.g. Q9A588|CC2569 monooxygenase (flavin-binding family) from Caulobacter crescentus (498 aa), FASTA scores: opt: 1959, E(): 2.9e-114, (57.6% identity in 481 aa overlap)	UniProt_AC=P96223	Is_Pseudogene=No	intermediary metabolism and respiration
Rv1594	-1.22253	6.66952	5.80221e-10	7.32763e-08		Rv1594	1794756	1795805	+	nadA	Probable quinolinate synthetase NadA	Comments=Rv1594, (MTCY336.10c), len: 349 aa. Probable nadA, quinolinate synthetase. Similar to many e.g. Q49622 NADA from Mycobacterium leprae (368 aa), FASTA results: opt: 1994, E(): 0, (84.4% identity in 352 aa overlap).	UniProt_AC=P65497	Is_Pseudogene=No	intermediary metabolism and respiration
Rv2590	-1.24467	7.41275	4.03843e-09	4.39179e-07		Rv2590	2917871	2921377	+	fadD9	Probable fatty-acid-CoA ligase FadD9 (fatty-acid-CoA synthetase) (fatty-acid-CoA synthase)	Comments=Rv2590, (MTCY227.11c), len: 1168 aa. Probable fadD9, fatty-acid-CoA synthetase, highly similar to O69484|FADD9 (alias Q9CCT4|FADD9|ML0484 but longer 14 aa) putative acyl-CoA synthetase from Mycobacterium leprae (1174 aa), FASTA scores: opt: 5247, E(): 0, (68.0% identity in 1178 aa overlap). N-terminal (approximately 700 residues) similar to other long chain fatty acid ligases. And C-term…	UniProt_AC=Q50631	Is_Pseudogene=No	lipid metabolism
Rv1047	-1.29025	5.55955	1.00623e-09	1.23106e-07		Rv1047	1169423	1170670	+	Rv1047	Probable transposase	Comments=Rv1047, (MTCY10G2.02c), len: 415 aa. IS1081 transposase, most similar to TRA1_MYCBO|P35882 transposase for insertion sequence element (415 aa), FASTA scores: opt: 2675, E(): 0, (99.8% identity in 415 aa overlap). Contains PS01007 Transposases, Mutator family, signature. This region is a possible MT-complex-specific genomic island (See Becq et al., 2007).	UniProt_AC=P96354	Is_Pseudogene=No	insertion seqs and phages
RVnc0004	-1.29455	3.30498	1.27144e-09	1.5084e-07
Rv0083	-1.31163	2.44709	9.21649e-08	8.01834e-06		Rv0083	90400	92322	+	Rv0083	Probable oxidoreductase	Comments=Rv0083, (MTV030.27, MTCY251.01), len: 640 aa. Probable oxidoreductase, showing some similarity to other various oxidoreductases. Nucleotide position 91071 in the genome sequence has been corrected, T:C resulting in I224I.	UniProt_AC=Q10880	Is_Pseudogene=No	intermediary metabolism and respiration
Rv0822c	-1.35271	5.59868	2.79493e-12	4.75746e-10		Rv0822c	914257	916311	-	Rv0822c	Conserved protein	Comments=Rv0822c, (MTV043.14c), len: 684 aa. Conserved protein, highly similar in the region between aa 370 - 580 to U2266O|U15182|MLU15182_30 hypothetical protein from Mycobacterium leprae (222 aa), FASTA scores: opt: 819, E(): 0, (60.6% identity in 221 aa overlap). More extended similarity to Rv3267|Z92771|MTCY71_7 from Mycobacterium tuberculosis (498 aa), FASTA scores: opt: 434, E(): 2.2e-17, …	UniProt_AC=O53834	Is_Pseudogene=No	conserved hypotheticals
Rv2640c	-1.3648	1.57307	1.34614e-05	0.00069344		Rv2640c	2965478	2965837	-	Rv2640c	Possible transcriptional regulatory protein (probably ArsR-family)	Comments=Rv2640c, (MTCY441.10c), len: 119 aa. Possible transcriptional regulator, arsR family, highly similar to many e.g. Q9L1V5|SC4A9.07 putative ArsR-family transcriptional regulator from Streptomyces coelicolor (117 aa), FASTA scores: opt: 261, E(): 5.6e-10, (47.75% identity in 103 aa overlap)	UniProt_AC=P71939	Is_Pseudogene=No	regulatory proteins
Rv3023c	-1.3654	5.61242	1.43562e-09	1.65307e-07		Rv3023c	3381375	3382622	-	Rv3023c	Probable transposase	Comments=Rv3023c, (MTV012.38c), len: 415 aa. Probable IS1081 transposase. Contains PS01007 Transposases, Mutator family, signature. Similars to P35882|TRA1_MYCTU|Rv1199c|MTCI364.11c and Rv2512c|MTCY07A7.18c transposases for insertion sequence element IS1081 (415 aa), FASTA scores: opt: 2675, E(): 1.8e-162, (100.0% identity in 415 aa overlap). Belongs to the mutator family of transposase.	UniProt_AC=P96354	Is_Pseudogene=No	insertion seqs and phages		SUBFAMILY NOT MED (PTHR30404:SF0)	hydrolase(PC00121)
Rv3115	-1.38007	5.55796	4.94335e-10	6.45107e-08		Rv3115	3481451	3482698	+	Rv3115	Probable transposase	Comments=Rv3115, (MTCY164.25), len: 415 aa. Probable IS1081 transposase, similar to others. Has transposases, mutator family, signature (PS01007). Other copies are MTCY10G2.02c, MTCY441.35, MTCY77.03c. This region is a possible MT-complex-specific genomic island (See Becq et al., 2007).	UniProt_AC=P96354	Is_Pseudogene=No	insertion seqs and phages
Rv2512c	-1.38629	5.69591	1.22882e-10	1.78178e-08		Rv2512c	2828556	2829803	-	Rv2512c	Transposase for insertion sequence element IS1081	Comments=Rv2512c, (MTCY07A7.18c), len: 415 aa. Transposase for IS1081, identical to P35882|TRA1_MYCBO transposase for insertion sequence element IS1081 from Mycobacterium bovis (415 aa), FASTA scores: opt: 2680, E(): 1.9e-162, (100.0% identity in 415 aa overlap). Also highly similar to others from Mycobacterium tuberculosis e.g. P96354|Rv1047|MTCY10G2.02c|Rv3115|MTCY164.25|Rv3023c|MTV012.38c (415…	UniProt_AC=P60230	Is_Pseudogene=No	insertion seqs and phages
Rv1199c	-1.39846	5.71502	7.14851e-11	1.0764e-08		Rv1199c	1341358	1342605	-	Rv1199c	Possible transposase	Comments=Rv1199c, (MTCI364.11c), len: 415 aa. Possible transposase for IS1081, identical to TRA1_MYCBO|P35882 transposase for insertion sequence element (415 aa)	UniProt_AC=P60230	Is_Pseudogene=No	insertion seqs and phages
Rv2987c	-1.40517	5.20391	4.69858e-13	9.19748e-11		Rv2987c	3344033	3344629	-	leuD	Probable 3-isopropylmalate dehydratase (small subunit) LeuD (isopropylmalate isomerase) (alpha-IPM isomerase) (IPMI)	Comments=Rv2987c, (MTV012.01c), len: 198 aa. Probable leuD, 3-isopropylmalate dehydratase, small subunit, equivalent to O33124|LEUD_MYCLE 3-isopropylmalate dehydratase small subunit from Mycobacterium leprae (198 aa), FASTA scores: opt: 1155, E(): 4.2e-72, (87.75% identity in 196 aa overlap). Also highly similar to many e.g. O86535|LEUD_STRCO from Streptomyces coelicolor (197 aa), FASTA scores: o…	UniProt_AC=P65277	Is_Pseudogene=No	intermediary metabolism and respiration
Rv0824c	-1.48303	8.53187	1.43662e-12	2.67826e-10		Rv0824c	917734	918750	-	desA1	Probable acyl-[acyl-carrier protein] desaturase DesA1 (acyl-[ACP] desaturase) (stearoyl-ACP desaturase) (protein Des)	Comments=Rv0824c, (MTV043.16c), len: 338 aa. Probable desA1 (alternate gene name: des), acyl-[acyl-carrier protein] desaturase (stearoyl-ACP desaturase) (see Jackson et al., 1997), equivalent to U15182|MLU15182_32 acyl-[ACP] desaturase from Mycobacterium leprae (338 aa), FASTA scores: opt: 1880, E(): 0, (79.9% identity in 338 aa overlap)	UniProt_AC=Q50824	Is_Pseudogene=No	lipid metabolism
RVnc0002	-1.50509	6.59249	1.76449e-12	3.13998e-10
Rv3229c	-1.53496	8.06915	3.55354e-11	5.56484e-09		Rv3229c	3605751	3607034	-	desA3	Possible linoleoyl-CoA desaturase (delta(6)-desaturase)	Comments=Rv3229c, (MTCY20B11.04c), len: 427 aa. DesA3, linoleoyl-CoA desaturase, showing similarity with desaturases and other proteins e.g. Q08871|DES6|SLL0262 linoleoyl-CoA desaturase from Synechocystis sp. strain PCC 6803 (359 aa), FASTA scores: opt: 319, E(): 4e-13, (25.1% identity in 295 aa overlap)	UniProt_AC=Q7D5W1	Is_Pseudogene=No	lipid metabolism
Rv0082	-1.55693	1.53277	1.28257e-06	7.97027e-05		Rv0082	89924	90403	+	Rv0082	Probable oxidoreductase	Comments=Rv0082, (MTV030.26), len: 159 aa. Probable oxidoreductase, highly similar or similar to other various oxidoreductases. Nucleotide position 90144 in the genome sequence has been corrected, A:G resulting in Q74R.	UniProt_AC=O53627	Is_Pseudogene=No	intermediary metabolism and respiration
Rv0081	-1.56854	1.58918	8.91638e-07	5.81794e-05		Rv0081	89575	89919	+	Rv0081	Probable transcriptional regulatory protein	Comments=Rv0081, (MTV030.25), len: 114 aa. Probable transcriptional regulator, highly similar to others.	UniProt_AC=O53626	Is_Pseudogene=No	regulatory proteins
Rv0823c	-1.69382	7.18656	2.35588e-16	5.12404e-14		Rv0823c	916477	917646	-	Rv0823c	Possible transcriptional regulatory protein	Comments=Rv0823c, (MTV043.15c), len: 389 aa. Possible transcriptional regulator (resembles nitrogen regulation protein), equivalent (but longer 24 aa in N-terminus) to MLU15182_31|U15182|NtrB NtrB protein from Mycobacterium leprae (384 aa), FASTA scores: opt: 2070, E(): 0, (82.3% identity in 384 aa overlap) (see citation below). Also highly similar to CAB63312.1|AL133471|SCC82.03c hypothetical pr…	UniProt_AC=O53835	Is_Pseudogene=No	regulatory proteins
Rv0197	-1.78758	6.48284	3.79241e-17	9.46761e-15		Rv0197	232231	234519	+	Rv0197	Possible oxidoreductase	Comments=Rv0197, (MTV033.05), len: 762 aa. Possible oxidoreductase, similar to others e.g. 9948789|AAG06102.1|AE004699_7|B83307 probable molybdopterin oxidoreductase from Pseudomonas aeruginosa strain PAO1 (769 aa)	UniProt_AC=O53648	Is_Pseudogene=No	intermediary metabolism and respiration
Rv2029c	-1.84203	0.945851	0.000168705	0.00547757		Rv2029c	2275405	2276424	-	pfkB	6-phosphofructokinase PfkB (phosphohexokinase) (phosphofructokinase)	Comments=Rv2029c, (MTV018.16c), len: 339 aa. PfkB, phosphofructokinase. Contains PS00583 pfkB family of carbohydrate kinases signature 1. Predicted possible vaccine candidate (See Zvi et al., 2008).	UniProt_AC=O86352	Is_Pseudogene=No	intermediary metabolism and respiration
Rv0196	-1.91415	5.00982	8.21017e-18	2.29592e-15		Rv0196	231647	232231	+	Rv0196	Possible transcriptional regulatory protein	Comments=Rv0196, (MTV033.04), len: 194 aa. Possible transcriptional regulatory protein, similar to two Bacillus subtilis regulators: P42105|YXAF_BACSU hypothetical 21.0 kDa protein (191 aa), FASTA scores: opt: 323, E(): 2.1e-15, (30.9% identity in 181 aa overlap)	UniProt_AC=O53647	Is_Pseudogene=No	regulatory proteins
Rv0158	-2.26307	2.40219	6.5722e-18	1.97924e-15		Rv0158	186785	187429	+	Rv0158	Probable transcriptional regulatory protein (possibly TetR-family)	Comments=Rv0158, (MTV032.01), len: 214 aa. Probable transcriptional regulator, possibly TetR family, showing weak similarity to various transcriptional activators and repressors e.g. P32398|YIXD_BACSU|YHGD hypothetical transcriptional regulatory protein from Bacillus subtilis (191 aa), FASTA scores: opt:172, E(): 2.4e-05, (23.0% identity in 191 aa overlap). Contains helix-turn-helix motif at aa 3…	UniProt_AC=O53641	Is_Pseudogene=No	regulatory proteins
Rv3130c	-2.43129	1.39074	1.30245e-07	1.04063e-05		Rv3130c	3494975	3496366	-	tgs1	Triacylglycerol synthase (diacylglycerol acyltransferase) Tgs1	Comments=Rv3130c, (MTCY03A2.28, MTCY164.41c), len: 463 aa. tgs1, triacylglycerol synthase (See Daniel et al., 2004	UniProt_AC=P0A650	Is_Pseudogene=No	lipid metabolism
Rv2030c	-2.8963	2.50963	4.35806e-09	4.6113e-07		Rv2030c	2276441	2278486	-	Rv2030c	Conserved protein	Comments=Rv2030c, (MTV018.17c), len: 681 aa. Conserved protein. Predicted possible vaccine candidate (See Zvi et al., 2008).	UniProt_AC=O53475	Is_Pseudogene=No	conserved hypotheticals
Rv2031c	-3.12561	1.43771	8.00667e-07	5.4045e-05		Rv2031c	2278498	2278932	-	hspX	Heat shock protein HspX (alpha-crystallin homolog) (14 kDa antigen) (HSP16.3)	Comments=Rv2031c, (MTV018.18c), len: 144 aa. HspX, heat shock protein localized in the inner membrane (see citations below). Identical to P30223|14KD_MYCTU 14 KD antigen (16 kDa antigen) (HSP 16.3) of Mycobacterium tuberculosis (143 aa). Belongs to the small heat shock protein (HSP20) family. Also known as alpha-crystallin and gene as acr (see some citations below). Predicted possible vaccine can…	UniProt_AC=P0A5B7	Is_Pseudogene=No	virulence, detoxification, adaptation
																					dehydrogese(PC00092)

## Sheet: Sheet3
List of differentially expressed genes in untreated rv0158 Comp Mtb relative to untreated wild-type Mtb (FDR< 0.05, fold change>1.5)
COMP_UT vs WT_UT	logFC	logCPM	PValue	FDR		LOCUS TAG	START SITE	END SITE	STRAND	GENE	PRODUCT	COMMENT			FUNCTIONAL CATEGORY
Rv0078B	-1.07126	3.32946	9.32375e-06	0.00174709		Rv0078B	87798	88004	-	Rv0078B	Conserved protein	Comments=Rv0078B, len: 68 aa. Conserved protein.	UniProt_AC=	Is_Pseudogene=No	conserved hypotheticals
Rv0159c	3.07539	6.34927	4.14709e-31	1.58832e-27		Rv0159c	187433	188839	-	PE3	PE family protein PE3	Comments=Rv0159c, (MTV032.02c), len: 468 aa. PE3, Member of the Mycobacterium tuberculosis PE family (see citation below), similar to many other PE proteins e.g. O06828 from Mycobacterium tuberculosis (528 aa), FASTA scores: opt: 1163, E(): 0, (45.8% identity in 467 aa overlap). Also highly similar to upstream MTV032_3, and to MTCI5_25, MTCI5_26, MTV049_ 21, MTCY1A10_26, etc.	UniProt_AC=Q79G04	Is_Pseudogene=No	PE/PPE
Rv0298	-1.11589	4.18842	1.06939e-07	3.31975e-05		Rv0298	363252	363479	+	Rv0298	Hypothetical protein	Comments=Rv0298, (MTCY63.03), len: 75 aa. Hypothetical unknown protein. This region is a possible MT-complex-specific genomic island (See Becq et al., 2007).	UniProt_AC=O07225	Is_Pseudogene=No	conserved hypotheticals
Rv0331	1.66755	2.96902	0.000125649	0.013363		Rv0331	396201	397367	+	Rv0331	Possible dehydrogenase/reductase	Comments=Rv0331, (MTCY63.36), len: 388 aa. Possible dehydrogenase/reductase, similar to various dehydrogenases/reductases e.g. NP_103779.1|14022957|BAB49565.1|AP002999 flavoprotein reductase from Mesorhizobium loti (377 aa)	UniProt_AC=O07255	Is_Pseudogene=No	intermediary metabolism and respiration
Rv0340	-0.903011	4.28234	3.68963e-05	0.00537729		Rv0340	408634	409173	+	Rv0340	Conserved protein	Comments=Rv0340, (MTCY279.07), len: 179 aa. Conserved protein	UniProt_AC=O33270	Is_Pseudogene=No	conserved hypotheticals
Rv0361	-0.805036	4.2379	0.000236801	0.02167		Rv0361	438822	439649	+	Rv0361	Probable conserved membrane protein	Comments=Rv0361, (MTCY13E10.23), len: 275 aa. Probable conserved membrane protein (has hydrophobic stretch from residues 132-156), equivalent to AL023514|MLCB4_17|AA18949.1|AL023514 putative membrane protein from Mycobacterium leprae (292 aa), FASTA scores: opt: 1044, E(): 0, (58.6% identity in 292 aa overlap). A core mycobacterial gene	UniProt_AC=O06311	Is_Pseudogene=No	cell wall and cell processes
Rv0634A	-0.814125	3.95553	9.22901e-05	0.010376		Rv0634A	731113	731364	+	Rv0634A	Unknown protein	Comments=Rv0634A, len: 83 aa. Unknown protein. A core mycobacterial gene	UniProt_AC=Q8VKH3	Is_Pseudogene=No	conserved hypotheticals
Rv0885	-0.90511	5.79446	0.00020245	0.0194303		Rv0885	982762	983784	+	Rv0885	Conserved hypothetical protein	Comments=Rv0885, (MTCY31.13), len: 340 aa. Conserved hypothetical protein, equivalent to O33063|MLCB57_18 possible transmembrane protein from Mycobacterium leprae (341 aa), FASTA score: (83.9% identity in 341 aa overlap). Also similar except in C-terminus to T35630 probable membrane protein from Streptomyces coelicolor (312 aa).	UniProt_AC=P0A5D5	Is_Pseudogene=No	conserved hypotheticals
Rv1047	-0.944584	5.81752	5.39166e-05	0.00707206		Rv1047	1169423	1170670	+	Rv1047	Probable transposase	Comments=Rv1047, (MTCY10G2.02c), len: 415 aa. IS1081 transposase, most similar to TRA1_MYCBO|P35882 transposase for insertion sequence element (415 aa), FASTA scores: opt: 2675, E(): 0, (99.8% identity in 415 aa overlap). Contains PS01007 Transposases, Mutator family, signature. This region is a possible MT-complex-specific genomic island (See Becq et al., 2007).	UniProt_AC=P96354	Is_Pseudogene=No	insertion seqs and phages
Rv1057	-1.65138	4.04444	1.27018e-05	0.00208257		Rv1057	1179396	1180577	+	Rv1057	Conserved hypothetical protein	Comments=Rv1057, (MTV017.10), len: 393 aa. Conserved hypothetical protein, some similarity to X84710|MMSAG_1 surface antigen of Methanosarci mazeii (491 aa), FASTA scores: opt: 363, E():6.2e-15, (31.3% identity in 294 aa overlap). Regulated by MprA (Rv0981) under physiological conditions and environmental stress (SDS and Triton X-100) (See He et al., 2006).	UniProt_AC=O53405	Is_Pseudogene=No	conserved hypotheticals
Rv1195	-1.2843	6.97294	2.0655e-07	5.80553e-05		Rv1195	1339003	1339302	+	PE13	PE family protein PE13	Comments=Rv1195, (MTCI364.07), len: 99 aa. PE13, Member of Mycobacterium tuberculosis PE family (see Brennan & Delogu 2002), e.g. Y0DP_MYCTU|Q50615 hypothetical glycine-rich 40.8 kd protein (498 aa), FASTA scores: opt: 307, E(): 1.4e-12, (56.3% identity in 96 aa overlap), similar to MTCY21C12.10c (99 aa), FASTA scores: opt:295, E(): 1.9e-11, (51.5% identity in 97 aa overlap).	UniProt_AC=Q79FR3	Is_Pseudogene=No	PE/PPE
Rv1196	-0.931596	8.39611	0.000182017	0.0183651		Rv1196	1339349	1340524	+	PPE18	PPE family protein PPE18	Comments=Rv1196, (MTCI364.08), len: 391 aa. PPE18 (alternate gene name: mtb39a). Member of the Mycobacterium tuberculosis PPE family of glycine-rich proteins, highly similar to others e.g. Y07P_MYCTU|Q11031 hypothetical 40.0 kDa protein cy02b10.25c (396 aa), FASTA scores: opt: 2124, E(): 0, (85.1% identity in 397 aa overlap). Note that expression of Rv1196 was demonstrated in lysates by immunodet…	UniProt_AC=Q7D8M9	Is_Pseudogene=No	PE/PPE
Rv1198	-0.944557	7.31778	0.000103439	0.0113065		Rv1198	1341006	1341290	+	esxL	Putative ESAT-6 like protein EsxL (ESAT-6 like protein 4)	Comments=Rv1198, (MT1236, MTCI364.10), len: 94 aa. EsxL, ESAT-6 like protein (see citation below). Member of the ESAT-6 family with Rv3619c, Rv1037c, etc. Almost identical to MTCY10G2.12 (94 aa) (97.9% identity in 94 aa overlap) and MTCY98.022c (94 aa) (94.7% identity in 94 aa overlap). Highly similar to Q49946|U1756D Mycobacterium leprae (95 aa), FASTA scores: opt: 403, E(): 1.1e-22, (64.1% iden…	UniProt_AC=O05300	Is_Pseudogene=No	cell wall and cell processes
Rv1199c	-1.04629	5.9692	1.19903e-05	0.00205138		Rv1199c	1341358	1342605	-	Rv1199c	Possible transposase	Comments=Rv1199c, (MTCI364.11c), len: 415 aa. Possible transposase for IS1081, identical to TRA1_MYCBO|P35882 transposase for insertion sequence element (415 aa)	UniProt_AC=P60230	Is_Pseudogene=No	insertion seqs and phages
Rv1331	-0.724475	4.52111	0.000407783	0.034141		Rv1331	1500661	1500966	+	Rv1331	Conserved hypothetical protein	Comments=Rv1331, (MTCY130.16), len: 101 aa. Conserved hypothetical protein, highly similar to U00014|ML014 B1549_C2_207 from Mycobacterium leprae (94 aa), FASTA scores: opt: 573, E(): 2.9e-40, (90.3% identity in 93 aa overlap). Similar to AL096852|SCE19A_16 hypothetical protein from Streptomyces coelicolor (105 aa), FASTA scores: opt: 377, E(): 2.9e-22, (60.0% identity in 105 aa overlap).	UniProt_AC=P67647	Is_Pseudogene=No	conserved hypotheticals	ATP-DEPENDENT CLP PROTEASE ADAPTER PROTEIN CLPS (PTHR33473:SF11)
Rv1738	-1.96317	0.900114	0.000532112	0.040295		Rv1738	1965657	1965941	+	Rv1738	Conserved protein	Comments=Rv1738, (MTCY04C12.23), len: 94 aa. Conserved protein, similar to P71931|Rv2632c|YQ32_MYCTU Hypothetical 10.1 kDa protein from Mycobacterium tuberculosis (93 aa), FASTA scores: opt: 319, E(): 2.6e-27, (53.9% identity in 89 aa overlap). Predicted possible vaccine candidate (See Zvi et al., 2008).	UniProt_AC=P64887	Is_Pseudogene=No	conserved hypotheticals
Rv1954c	0.999325	4.67715	7.2745e-06	0.00143126		Rv1954c	2201223	2201744	-	Rv1954c	Hypothetical protein	Comments=Rv1954c, (MTCY09F9.10), len: 173 aa. Hypothetical unknown protein, end overlaps next ORF upstream, Rv1955 (MTCY09F9.09c).	UniProt_AC=P95260	Is_Pseudogene=No	conserved hypotheticals
Rv1955	0.970217	3.1651	0.000532488	0.040295		Rv1955	2201719	2202096	+	higB	Possible toxin HigB	Comments=Rv1955, (MTCY09F9.09c), len: 125 aa. Possible higB, toxin, part of toxin-antitoxin (TA) operon with Rv1956 (See Pandey and Gerdes, 2005	UniProt_AC=P95259	Is_Pseudogene=No	virulence, detoxification, adaptation
Rv1956	1.05922	2.71492	0.000149226	0.0154527		Rv1956	2202138	2202587	+	higA	Possible antitoxin HigA	Comments=Rv1956, (MTCY09F9.08c), len: 149 aa. Possible higA, antitoxin, part of toxin-antitoxin (TA) operon with Rv1955 (See Pandey and Gerdes, 2005	UniProt_AC=P95258	Is_Pseudogene=No	virulence, detoxification, adaptation
Rv2007c	-1.40365	1.23278	0.000639369	0.046591		Rv2007c	2256084	2256428	-	fdxA	Ferredoxin FdxA	Comments=Rv2007c, (MTCY39.10), len: 114 aa. FdxA, ferredoxin, similar to many e.g. FER_MYCSM P00215 ferredoxin, Mycobacterium smegmatis (106 aa).	UniProt_AC=P64122	Is_Pseudogene=No	intermediary metabolism and respiration
Rv2029c	-2.29731	0.928109	9.90171e-06	0.00177106		Rv2029c	2275405	2276424	-	pfkB	6-phosphofructokinase PfkB (phosphohexokinase) (phosphofructokinase)	Comments=Rv2029c, (MTV018.16c), len: 339 aa. PfkB, phosphofructokinase. Contains PS00583 pfkB family of carbohydrate kinases signature 1. Predicted possible vaccine candidate (See Zvi et al., 2008).	UniProt_AC=O86352	Is_Pseudogene=No	intermediary metabolism and respiration
Rv2030c	-2.40877	2.74013	1.6276e-06	0.000355811		Rv2030c	2276441	2278486	-	Rv2030c	Conserved protein	Comments=Rv2030c, (MTV018.17c), len: 681 aa. Conserved protein. Predicted possible vaccine candidate (See Zvi et al., 2008).	UniProt_AC=O53475	Is_Pseudogene=No	conserved hypotheticals	SUBFAMILY NOT MED (PTHR31299:SF0)
Rv2031c	-3.25898	1.54251	1.43584e-06	0.000353127		Rv2031c	2278498	2278932	-	hspX	Heat shock protein HspX (alpha-crystallin homolog) (14 kDa antigen) (HSP16.3)	Comments=Rv2031c, (MTV018.18c), len: 144 aa. HspX, heat shock protein localized in the inner membrane (see citations below). Identical to P30223|14KD_MYCTU 14 KD antigen (16 kDa antigen) (HSP 16.3) of Mycobacterium tuberculosis (143 aa). Belongs to the small heat shock protein (HSP20) family. Also known as alpha-crystallin and gene as acr (see some citations below). Predicted possible vaccine can…	UniProt_AC=P0A5B7	Is_Pseudogene=No	virulence, detoxification, adaptation
Rv2034	1.85574	2.44991	2.01356e-08	7.92335e-06		Rv2034	2281294	2281617	+	Rv2034	ArsR repressor protein	Comments=Rv2034, (MTV018.21), len: 107 aa. Repressor protein belonging to the ArsR family. Contains probable helix-turn-helix at aa 32-53 (S core 1350, +3.78 SD).	UniProt_AC=O53478	Is_Pseudogene=No	regulatory proteins
Rv2111c	-0.795921	4.39562	0.000403641	0.034141		Rv2111c	2370598	2370792	-	pup	Prokaryotic ubiquitin-like protein Pup	Comments=Rv2111c, MTCY261.07c, len: 64 aa. Pup, prokaryotic ubiquitin-like protein (See Pearce et al., 2008). Highly similar to many. Pup|Rv2111c and Mpa|Rv2115c interact (See Pearce et al., 2008).	UniProt_AC=O33246	Is_Pseudogene=No	intermediary metabolism and respiration
Rv2189c	0.887594	4.38967	8.00976e-05	0.00927012		Rv2189c	2451247	2452020	-	Rv2189c	Conserved hypothetical protein	Comments=Rv2189c, (MTV021.22c), len: 257 aa. Conserved hypothetical protein	UniProt_AC=O53523	Is_Pseudogene=No	conserved hypotheticals
Rv2254c	0.972033	2.76872	0.000652787	0.0467039		Rv2254c	2528520	2528975	-	Rv2254c	Probable integral membrane protein	Comments=Rv2254c, (MTV022.04c), len: 151 aa. Probable integral membrane protein.	UniProt_AC=O53528	Is_Pseudogene=No	cell wall and cell processes
Rv2256a	0.817312	3.64291	0.000376417	0.0329156
Rv2352c	0.776248	4.10105	0.00041704	0.0341886		Rv2352c	2632923	2634098	-	PPE38	PPE family protein PPE38	Comments=Rv2352c, (MTCY98.21c), len: 391 aa. PPE38, Member of Mycobacterium tuberculosis PPE_family, highly similar to many e.g. Q10778|MTCY48.17|Y04H_MYCTU (734 aa), FASTA scores: opt: 713, E(): 2.8e-27, (37.7% identity in 430 aa overlap)	UniProt_AC=Q7D7A2	Is_Pseudogene=No	PE/PPE
Rv2450c	-1.75146	1.70766	7.78566e-05	0.00927012		Rv2450c	2751662	2752180	-	rpfE	Probable resuscitation-promoting factor RpfE	Comments=Rv2450c, (MTV008.06c), len: 172 aa. Probable rpfE, resuscitation-promoting factor (see Mukamolova et al., 1998), similar to O86308|Z96935|MLRPF_1 RPF protein precursor from Micrococcus luteus (220 aa), FASTA scores: opt: 291, E(): 3e-7, (48.75% identity in 80 aa overlap). C-terminus is similar to other Mycobacterial rpf proteins e.g. O05594|Rv1009|MTCI237.26|RPFB probable resuscitation-p…	UniProt_AC=O53177	Is_Pseudogene=No	cell wall and cell processes
Rv2462c	-1.61874	5.45811	2.77054e-11	1.55744e-08		Rv2462c	2763891	2765291	-	tig	Probable trigger factor (TF) protein Tig	Comments=Rv2462c, (MTV008.18c), len: 466 aa. Probable tig, trigger factor (TF), a chaperone protein, equivalent to Q9CBY2|ML1481 possible molecular chaperone from Mycobacterium leprae (469 aa), FASTA scores: opt: 2171, E(): 7.2e-113, (70.1% identity in 468 aa overlap). Also similar to oyher trigger factors from several organisms e.g. Q9F314|SCC80.05c from Streptomyces coelicolor (468 aa), FASTA s…	UniProt_AC=O53189	Is_Pseudogene=No	cell wall and cell processes
Rv2463	-2.61425	4.7967	8.07279e-31	1.58832e-27		Rv2463	2765655	2766839	+	lipP	Probable esterase/lipase LipP	Comments=Rv2463, (MTV008.19), len: 394 aa. Probable lipP, esterase, lipase similar to others eg O87861|ESTA esterase a from Streptomyces chrysomallus (389 aa), FASTA scores: opt: 964, E(): 1.9e-53, (44.35% identity in 399 aa overlap)	UniProt_AC=O53190	Is_Pseudogene=No	intermediary metabolism and respiration
Rv2464c	-1.16235	3.29264	2.07789e-06	0.000430342		Rv2464c	2766859	2767665	-	Rv2464c	Possible DNA glycosylase	Comments=Rv2464c, (MT2539, MTV008.20c), len: 268 aa. Possible DNA glycosylase, showing some similarity to several other DNA glycosylases e.g. Q9F308|SCC80.11c putative DNA repair hydrolase (fragment) from Streptomyces coelicolor (306 aa), FASTA scores: opt: 894, E(): 6.1e-51, (51.05% identity in 282 aa overlap)	UniProt_AC=P64158	Is_Pseudogene=No	information pathways
Rv2512c	-1.0324	5.95168	1.77257e-05	0.00279002		Rv2512c	2828556	2829803	-	Rv2512c	Transposase for insertion sequence element IS1081	Comments=Rv2512c, (MTCY07A7.18c), len: 415 aa. Transposase for IS1081, identical to P35882|TRA1_MYCBO transposase for insertion sequence element IS1081 from Mycobacterium bovis (415 aa), FASTA scores: opt: 2680, E(): 1.9e-162, (100.0% identity in 415 aa overlap). Also highly similar to others from Mycobacterium tuberculosis e.g. P96354|Rv1047|MTCY10G2.02c|Rv3115|MTCY164.25|Rv3023c|MTV012.38c (415…	UniProt_AC=P60230	Is_Pseudogene=No	insertion seqs and phages
Rv2638	0.967788	2.86297	0.000463893	0.0365822		Rv2638	2964405	2964851	+	Rv2638	Conserved hypothetical protein	Comments=Rv2638, (MTCY441.08), len: 148 aa. Conserved hypothetical protein, similar in part to Q9WVX8|RSBV_STRCO|bldg|SCH5.12c anti-sigma B factor antagonist from Streptomyces coelicolor (113 aa), FASTA scores: opt: 162, E(): 0.00066, (31.8% identity in 110 aa overlap)	UniProt_AC=P71937	Is_Pseudogene=No	conserved hypotheticals	SUBFAMILY NOT MED (PTHR33495:SF2)
Rv2641	2.26778	5.37667	1.80302e-08	7.88322e-06		Rv2641	2965939	2966397	+	cadI	Cadmium inducible protein CadI	Comments=Rv2641, (MTCY441.11), len: 152 aa. CadI, conserved hypothetical protein. Gene induced by cadmium (see Hotter et al., 2001), highly similar to hypothetical proteins e.g. Q9L222|SC1A2.19c from Streptomyces coelicolor (152 aa), FASTA scores: opt: 509, E(): 2.3e-27, (55.05% identity in 149 aa overlap)	UniProt_AC=P0A5N6	Is_Pseudogene=No	conserved hypotheticals	SUBFAMILY NOT MED (PTHR41294:SF1)
Rv2642	2.62863	3.58631	2.67461e-12	1.7541e-09		Rv2642	2966533	2966913	+	Rv2642	Possible transcriptional regulatory protein (probably ArsR-family)	Comments=Rv2642, (MTCY441.12), len: 126 aa. Possible transcriptional regulator, arsR family, highly similar to many e.g. Q9X8X8|SCH35.28c putative transcriptional regulator from Streptomyces coelicolor (122 aa), FASTA scores: opt: 390, E(): 3.7e-19, (56.55% identity in 122 aa overlap)	UniProt_AC=P71941	Is_Pseudogene=No	regulatory proteins
Rv2643	1.31123	3.74883	1.5436e-06	0.000355811		Rv2643	2966910	2968406	+	arsC	Probable arsenic-transport integral membrane protein ArsC	Comments=Rv2643, (MTCY441.13), len: 498 aa. Probable arsC, arsenical resistance transport integral membrane protein, highly similar or similar to others e.g. Q9L1X4|SC3D9.05 possible arsenic resistance membrane transport protein from Streptomyces coelicolor (368 aa), FASTA scores: opt: 1729, E(): 2.2e-96, (74.3% identity in 358 aa overlap)	UniProt_AC=P71942	Is_Pseudogene=No	cell wall and cell processes
Rv2706c	-1.06738	3.33598	0.000196476	0.0193283		Rv2706c	3020200	3020457	-	Rv2706c	Hypothetical protein	Comments=Rv2706c, (MTCY05A6.27c), len: 85 aa (unlikely ORF). Hypothetical unknown protein.	UniProt_AC=O07207	Is_Pseudogene=No	conserved hypotheticals
Rv2816c	0.876362	3.89273	0.000212632	0.0199216		Rv2816c	3123625	3123966	-	Rv2816c	Conserved hypothetical protein	Comments=Rv2816c, (MTCY16B7.27), len: 113 aa. Conserved hypothetical protein, highly similar in part to N-terminus of several proteins e.g. O28403|AF1876 conserved hypothetical protein from Archaeoglobus fulgidus (94 aa), FASTA scores: opt: 137, E(): 0.0022, (47.55% identity in 61 aa overlap)	UniProt_AC=P71637	Is_Pseudogene=No	conserved hypotheticals	SUBFAMILY NOT MED (PTHR34405:SF3)
Rv2861c	-0.875713	4.97476	7.91813e-05	0.00927012		Rv2861c	3173160	3174017	-	mapB	Methionine aminopeptidase MapB (map) (peptidase M)	Comments=Rv2861c, (MT2929, MTV003.07c), len: 285 aa. mapB (alternate gene name: map), methionine aminopeptidase, equivalent to Q9CBU7|MAPB|ML1576 methionine aminopeptidase from Mycobacterium leprae (285 aa), FASTA scores: opt: 1729, E(): 1e-99, (89.75% identity in 283 aa overlap). Also highly similar to many e.g. Q9RKR2|MAP3 from Streptomyces coelicolor (285 aa), FASTA scores: opt: 1385, E(): 2e-…	UniProt_AC=P0A5J2	Is_Pseudogene=No	intermediary metabolism and respiration
Rv2875	1.26025	1.98168	0.000318302	0.0284663		Rv2875	3187030	3187611	+	mpt70	Major secreted immunogenic protein Mpt70	Comments=Rv2875, (MTCY274.06), len: 193 aa. Mpt70 (alternate gene name: mpb70), major secreted immunogenic protein MPT70 precursor (see citations below). Also similar to downstream ORF Q10790|MP83_MYCTU|MPT83|MPB83|Rv2873|MT2940|MTCY274.04 cell surface lipoprotein MPT83 precursor (lipoprotein P23) (220 aa), FASTA scores: opt: 806, E(): 1.2e-40, (70.25% identity in 185 aa overlap). Belongs to the …	UniProt_AC=P0A668	Is_Pseudogene=No	cell wall and cell processes
Rv2934	1.50329	6.29539	8.9915e-10	4.4227e-07		Rv2934	3262248	3267731	+	ppsD	Phenolpthiocerol synthesis type-I polyketide synthase PpsD	Comments=Rv2934, (MTCY19H9.02), len: 1827 aa. PpsD, type-I polyketide synthase (see citations below), highly similar to others from Mycobacterium leprae e.g. Q9CB70|ML2354 polyketide synthase (1822 aa), FASTA scores: opt: 9779, E(): 0, (80.35% identity in 1836 aa overlap)	UniProt_AC=P96203	Is_Pseudogene=No	lipid metabolism
Rv2940c	-0.783589	9.25723	0.000603624	0.0448162		Rv2940c	3276380	3282715	-	mas	Probable multifunctional mycocerosic acid synthase membrane-associated Mas	Comments=Rv2940c, (MTCY24G1.09, MTCY19H9.08c), len: 2111 aa. Probable mas, mycocerosic acid synthase membrane associated, multifunctional enzyme (see citations below), almost identical to Q02251|MCAS_MYCBO|mas mycocerosic acid synthase from Mycobacterium bovis (2110 aa), FASTA scores: opt: 13226, E(): 0, (95.8% identity in 2115 aa overlap) (see Mathur & Kolattukudy 1992)	UniProt_AC=P96291	Is_Pseudogene=No	lipid metabolism
Rv3023c	-0.996383	5.87534	4.81729e-05	0.00653657		Rv3023c	3381375	3382622	-	Rv3023c	Probable transposase	Comments=Rv3023c, (MTV012.38c), len: 415 aa. Probable IS1081 transposase. Contains PS01007 Transposases, Mutator family, signature. Similars to P35882|TRA1_MYCTU|Rv1199c|MTCI364.11c and Rv2512c|MTCY07A7.18c transposases for insertion sequence element IS1081 (415 aa), FASTA scores: opt: 2675, E(): 1.8e-162, (100.0% identity in 415 aa overlap). Belongs to the mutator family of transposase.	UniProt_AC=P96354	Is_Pseudogene=No	insertion seqs and phages
Rv3054c	2.36303	2.15315	4.79953e-08	1.71692e-05		Rv3054c	3415435	3415989	-	Rv3054c	Conserved hypothetical protein	Comments=Rv3054c, (MTCY22D7.28), len: 184 aa. Conserved hypothetical protein, similar to Q9RD22|SCM1.21 putative secreted protein from Streptomyces coelicolor (187 aa), FASTA scores: opt: 651, E(): 1.5e-33, (56.8% identity in 175 aa overlap). Also shares similarity with other hypothetical proteins and Chromate reductases e.g. AAK56853|CHRR from Pseudomos putida (186 aa), FASTA scores: opt: 339, E…	UniProt_AC=P95105	Is_Pseudogene=No	conserved hypotheticals	D(P)H-DEPENDENT FMN REDUCTASE LOT6 (PTHR30543:SF1)
Rv3115	-0.949688	5.84222	7.48191e-05	0.00927012		Rv3115	3481451	3482698	+	Rv3115	Probable transposase	Comments=Rv3115, (MTCY164.25), len: 415 aa. Probable IS1081 transposase, similar to others. Has transposases, mutator family, signature (PS01007). Other copies are MTCY10G2.02c, MTCY441.35, MTCY77.03c. This region is a possible MT-complex-specific genomic island (See Becq et al., 2007).	UniProt_AC=P96354	Is_Pseudogene=No	insertion seqs and phages
Rv3130c	-2.44845	1.51609	1.09674e-07	3.31975e-05		Rv3130c	3494975	3496366	-	tgs1	Triacylglycerol synthase (diacylglycerol acyltransferase) Tgs1	Comments=Rv3130c, (MTCY03A2.28, MTCY164.41c), len: 463 aa. tgs1, triacylglycerol synthase (See Daniel et al., 2004	UniProt_AC=P0A650	Is_Pseudogene=No	lipid metabolism
Rv3140	-0.799476	6.51007	0.000672163	0.0472314		Rv3140	3506790	3507995	+	fadE23	Probable acyl-CoA dehydrogenase FadE23	Comments=Rv3140, (MTCY03A2.18c), len: 401 aa. Probable fadE23, acyl-CoA dehydrogenase (1.3.99.-) (see citation below), equivalent to O32891|MLCB1779.31|FADE23|ML0660 putative acyl-CoA dehydrogenase from Mycobacterium leprae (400 aa), FASTA scores: opt: 2307, E(): 3e-136, (89.5% identity in 401 aa overlap). Also similar to others e.g. Q9HUH1|PA4994 from Pseudomonas aeruginosa (402 aa), FASTA score…	UniProt_AC=P95186	Is_Pseudogene=No	lipid metabolism
Rv3339c	-1.10982	5.00016	3.34005e-07	8.76205e-05		Rv3339c	3724615	3725844	-	icd1	Probable isocitrate dehydrogenase [NADP] Icd1 (oxalosuccinate decarboxylase) (IDH) (NADP+-specific ICDH) (IDP)	Comments=Rv3339c, (MTV016.39c), len: 409 aa. Probable icd1, isocitrate dehydrogenase NADP-dependent, highly similar to many e.g. Q9A5C8|CC2522 from Caulobacter crescentus (403 aa), FASTA scores: opt: 1972, E(): 4.6e-115, (72.45% identity in 403 aa overlap)	UniProt_AC=P65097	Is_Pseudogene=No	intermediary metabolism and respiration
Rv3706c	-1.02922	2.64599	0.000464831	0.0365822		Rv3706c	4149591	4149911	-	Rv3706c	Conserved hypothetical proline rich protein	Comments=Rv3706c, (MTV025.054c), len: 106 aa. Conserved ypothetical pro-rich protein, similar to upstream ORF Rv3705A (129 aa), and AAK48176|MT3808.1 hypothetical 13.0 KDA protein from Mycobacterium tuberculosis strain CDC1551 (129 aa), FASTA scores: opt: 245, E(): 4.4e-06, (40.7% identity in 113 aa overlap).	UniProt_AC=O69674	Is_Pseudogene=No	conserved hypotheticals
Rv3854c	-0.972919	6.67526	4.7395e-05	0.00653657		Rv3854c	4326004	4327473	-	ethA	Monooxygenase EthA	Comments=Rv3854c, (MTCY01A6.14), len: 489 aa. EthA (alternate gene names: aka, etaA), monooxygenase required for activation of the pro-drug ethionamide (see citations below), highly similar to other monooxygenases e.g. Q9A588|CC2569 monooxygenase (flavin-binding family) from Caulobacter crescentus (498 aa), FASTA scores: opt: 1959, E(): 2.9e-114, (57.6% identity in 481 aa overlap)	UniProt_AC=P96223	Is_Pseudogene=No	intermediary metabolism and respiration
Rv3855	-0.988945	3.51959	2.29582e-05	0.00347464		Rv3855	4327549	4328199	+	ethR	Transcriptional regulatory repressor protein (TetR-family) EthR	Comments=Rv3855, (MTCY01A6.13c), len: 216 aa. EthR (alternate gene names: aka, etaR), regulatory protein TetR family, involved in ethionamide sensitivity/resistance, negatively controls neighbouring ethA (Rv3854c, MTCY01A6.14	UniProt_AC=P96222	Is_Pseudogene=No	regulatory proteins
Rvnt26	-4.49123	0.987832	4.88647e-24	4.80707e-21

## Sheet: Sheet4
			Rv0158 transcriptome						Rv0158 transcriptome					Rv0158 transcriptome			Fold change
	Functional category based on MycoBrowser database	Mtb genome	Number of genes;FC>1.5	Number of genes;FC>2				Mtb genome	FC>1.5	FC>2			Mtb genome	FC>1.5	FC>2		FC>1.5	FC>2
1	cell wall and cell processes	0.191468	23	4			cell wall and cell processes	19.1468	0.100877	0.0533333		cell wall and cell processes	19.1468	10.0877	5.33333		0.526862	0.27855
2	conserved hypotheticals	0.258433	50	15			conserved hypotheticals	25.8433	0.219298	0.2		conserved hypotheticals	25.8433	21.9298	20		0.848569	0.773895
3	information pathways	0.060268	8	0			information pathways	6.0268	0.0350877	0		information pathways	6.0268	3.50877	0		0.582195	0
4	intermediary metabolism and respiration	0.232143	55	16			intermediary metabolism and respiration	23.2143	0.241228	0.213333		intermediary metabolism and respiration	23.2143	24.1228	21.3333		1.03914	0.918974
5	lipid metabolism	0.06746	37	15			lipid metabolism	6.746	0.162281	0.2		lipid metabolism	6.746	16.2281	20		2.40558	2.96472
6	PE/PPE	0.041667	11	4			PE/PPE	4.1667	0.0482456	0.0533333		PE/PPE	4.1667	4.82456	5.33333		1.15789	1.27999
7	regulatory proteins	0.049107	16	7			regulatory proteins	4.9107	0.0701754	0.0933333		regulatory proteins	4.9107	7.01754	9.33333		1.42903	1.90061
8	virulence, detoxification, adaptation	0.059524	22	9			virulence, detoxification, adaptation	5.9524	0.0964912	0.12		virulence, detoxification, adaptation	5.9524	9.64912	12		1.62105	2.01599
			228	75
