# Supplementary material for: Biosensor-integrated transposon mutagenesis reveals rv0158 as a coordinator of redox homeostasis in Mycobacterium tuberculosis
Source: eLife. 2023 Aug 29;12:e80218. doi: 10.7554/eLife.80218 (PMC10501769; doi:10.7554/eLife.80218)
Supplement: Supplementary file 5. [file elife-80218-supp5.xlsx]

## Sheet: glucose Replicate 1
# This file is generated by MACS version 2.2.6
# Command line: callpeak -t G1_ChIP_S7_R1_001.sorted.bam -c G1_Inp_S1_R1_001.sorted.bam -g 4411532 --mfold 2 80 -s 50 --nomodel --keep-dup all --outdir ../macs_out/single_sample/G1/
# ARGUMENTS LIST:
# name = NA
# format = AUTO
# ChIP-seq file = ['G1_ChIP_S7_R1_001.sorted.bam']
# control file = ['G1_Inp_S1_R1_001.sorted.bam']
# effective genome size = 4.41e+06
# band width = 300
# model fold = [2, 80]
# qvalue cutoff = 5.00e-02
# The maximum gap between significant sites is assigned as the read length/tag size.
# The minimum length of peaks is assigned as the predicted fragment length "d".
# Larger dataset will be scaled towards smaller dataset.
# Range for calculating regional lambda is: 1000 bps and 10000 bps
# Broad region calling is off
# Paired-End mode is off
# tag size is determined as 50 bps
# total tags in treatment: 12034685
# total tags in control: 11862095
# d = 200
chr	start	end	length	abs_summit	pileup	#NAME?	fold_enrichment	#NAME?	name
NC_000962.3	691	905	215	763	1253.76	4.97997	1.13041	3.51472	NA_peak_1
NC_000962.3	11013	11226	214	11162	1011.29	5.20446	1.15033	3.72999	NA_peak_2
NC_000962.3	33726	34427	702	34125	1092.11	42.5635	1.56159	40.3558	NA_peak_3
NC_000962.3	34799	35609	811	35182	1218.27	40.2388	1.50342	38.0757	NA_peak_4
NC_000962.3	50378	50976	599	50842	1372.04	21.6767	1.31266	19.8556	NA_peak_5
NC_000962.3	51080	51288	209	51219	1142.38	5.69874	1.14936	4.20539	NA_peak_6
NC_000962.3	57904	58287	384	58105	4024.45	48.9325	1.27388	46.6042	NA_peak_7
NC_000962.3	78985	79366	382	79198	824.01	17.354	1.36818	15.6057	NA_peak_8
NC_000962.3	105765	106208	444	106019	766.84	16.6495	1.37606	14.9132	NA_peak_9
NC_000962.3	106700	107054	355	106870	733.33	9.58507	1.26827	7.98529	NA_peak_10
NC_000962.3	130536	130795	260	130679	841.75	6.95488	1.20187	5.42025	NA_peak_11
NC_000962.3	135743	138099	2357	137274	1459.76	37.2098	1.42652	35.1046	NA_peak_12
NC_000962.3	139598	139802	205	139665	669.26	7.61633	1.24307	6.06278	NA_peak_13
NC_000962.3	186735	187235	501	186982	10610.6	95.4448	1.23205	92.3179	NA_peak_14
NC_000962.3	193730	193958	229	193948	893.99	3.01288	1.11152	1.65567	NA_peak_15
NC_000962.3	196526	196985	460	196751	1229.12	20.5953	1.32328	18.7916	NA_peak_16
NC_000962.3	225690	226300	611	226042	1240.94	18.4237	1.30047	16.6558	NA_peak_17
NC_000962.3	226506	226969	464	226723	1266.57	16.4993	1.27651	14.7656	NA_peak_18
NC_000962.3	296495	297185	691	296848	1035.93	21.2134	1.36654	19.3998	NA_peak_19
NC_000962.3	300807	301852	1046	301792	873.29	7.62953	1.20926	6.07569	NA_peak_20
NC_000962.3	308801	309038	238	308977	748.12	5.89687	1.19248	4.39633	NA_peak_21
NC_000962.3	323013	323401	389	323292	1089.15	7.77651	1.18701	6.2185	NA_peak_22
NC_000962.3	331563	331934	372	331825	756	16.9044	1.38139	15.1638	NA_peak_23
NC_000962.3	339095	339346	252	339287	1026.07	10.7358	1.23743	9.11219	NA_peak_24
NC_000962.3	339919	340297	379	340139	1217.29	26.2007	1.37972	24.3051	NA_peak_25
NC_000962.3	361145	361449	305	361307	795.43	10.8038	1.27678	9.17889	NA_peak_26
NC_000962.3	370104	371200	1097	370491	1376.97	17.9745	1.27826	16.2149	NA_peak_27
NC_000962.3	371405	372129	725	371697	1580.01	40.3359	1.42691	38.1709	NA_peak_28
NC_000962.3	372607	373914	1308	372962	1427.23	26.5379	1.34739	24.6366	NA_peak_29
NC_000962.3	387696	387957	262	387869	851.61	11.1036	1.27103	9.47265	NA_peak_30
NC_000962.3	409332	410416	1085	409785	1056.63	25.9167	1.41205	24.0258	NA_peak_31
NC_000962.3	410894	411268	375	410951	1017.2	2.96321	1.10195	1.6099	NA_peak_32
NC_000962.3	419631	419996	366	419810	820.07	8.53541	1.23284	6.95877	NA_peak_33
NC_000962.3	432074	433197	1124	432268	1321.77	25.9561	1.35947	24.0646	NA_peak_34
NC_000962.3	483613	487130	3518	485837	1966.39	75.7762	1.5639	72.923	NA_peak_35
NC_000962.3	488985	490013	1029	489288	1277.41	59.5939	1.63899	57.0573	NA_peak_36
NC_000962.3	528652	529207	556	529055	1270.51	4.97894	1.12923	3.51372	NA_peak_37
NC_000962.3	538826	542251	3426	541674	1897.39	68.5716	1.53965	65.845	NA_peak_38
NC_000962.3	545097	545803	707	545416	1166.03	21.2098	1.33988	19.3963	NA_peak_39
NC_000962.3	559598	560808	1211	560449	1828.4	41.7068	1.39862	39.5157	NA_peak_40
NC_000962.3	577586	577912	327	577647	955.1	15.651	1.31514	13.9326	NA_peak_41
NC_000962.3	592628	592928	301	592756	1111.82	9.54015	1.21135	7.94124	NA_peak_42
NC_000962.3	597859	598211	353	597993	1402.59	12.329	1.21734	10.6735	NA_peak_43
NC_000962.3	598322	599935	1614	598709	1868.81	68.5327	1.5453	65.807	NA_peak_44
NC_000962.3	676049	676256	208	676196	763.89	11.0041	1.28769	9.37533	NA_peak_45
NC_000962.3	731321	731614	294	731471	936.38	10.6349	1.24917	9.01334	NA_peak_46
NC_000962.3	733301	733690	390	733615	1287.27	4.80425	1.12513	3.34627	NA_peak_47
NC_000962.3	759350	759831	482	759512	1070.43	36.3165	1.51118	34.2281	NA_peak_48
NC_000962.3	778642	779078	437	778959	1027.06	11.859	1.25281	10.2123	NA_peak_49
NC_000962.3	781227	781769	543	781625	1264.6	9.27236	1.19284	7.67928	NA_peak_50
NC_000962.3	800093	800454	362	800312	720.52	8.5893	1.25263	7.01125	NA_peak_51
NC_000962.3	811232	811448	217	811354	909.76	10.0931	1.24557	8.48258	NA_peak_52
NC_000962.3	824634	824882	249	824761	1151.25	6.42712	1.16061	4.90897	NA_peak_53
NC_000962.3	847991	849642	1652	848408	1782.07	78.4462	1.61657	75.5366	NA_peak_54
NC_000962.3	850258	850697	440	850533	1301.07	12.2284	1.22513	10.5745	NA_peak_55
NC_000962.3	885677	885911	235	885770	759.94	7.21783	1.21946	5.67557	NA_peak_56
NC_000962.3	899696	900016	321	899882	756.99	13.3905	1.32887	11.7143	NA_peak_57
NC_000962.3	904860	905092	233	905001	1205.46	6.70779	1.16118	5.18097	NA_peak_58
NC_000962.3	918636	918871	236	918757	1154.21	9.79134	1.20964	8.18709	NA_peak_59
NC_000962.3	967725	967929	205	967766	1184.76	9.53929	1.20382	7.94043	NA_peak_60
NC_000962.3	1039564	1040105	542	1039982	1065.5	25.7977	1.40848	23.9088	NA_peak_61
NC_000962.3	1065972	1066212	241	1066074	730.37	4.11985	1.15359	2.69356	NA_peak_62
NC_000962.3	1077833	1078166	334	1077978	962	12.9133	1.27719	11.2464	NA_peak_63
NC_000962.3	1101774	1106537	4764	1104667	2227.59	78.201	1.53062	75.2956	NA_peak_64
NC_000962.3	1113493	1113706	214	1113593	850.62	4.18005	1.14312	2.75059	NA_peak_65
NC_000962.3	1123498	1123804	307	1123667	1115.77	18.5816	1.32162	16.8109	NA_peak_66
NC_000962.3	1163499	1163719	221	1163663	946.23	4.34917	1.13823	2.91141	NA_peak_67
NC_000962.3	1178815	1179384	570	1178972	901.88	45.8978	1.67579	43.6257	NA_peak_68
NC_000962.3	1190326	1190816	491	1190569	1263.61	30.1298	1.40669	28.1625	NA_peak_69
NC_000962.3	1192033	1192462	430	1192297	1170.96	24.2411	1.37072	22.3781	NA_peak_70
NC_000962.3	1196415	1196792	378	1196715	1348.38	5.41401	1.13203	3.93159	NA_peak_71
NC_000962.3	1196875	1197518	644	1197162	1943.72	46.583	1.41229	44.2976	NA_peak_72
NC_000962.3	1205777	1206065	289	1205926	860.48	5.26347	1.16574	3.78675	NA_peak_73
NC_000962.3	1214203	1214694	492	1214428	1591.84	79.3359	1.67245	76.4088	NA_peak_74
NC_000962.3	1214907	1215336	430	1215129	1410.48	40.3937	1.45965	38.2276	NA_peak_75
NC_000962.3	1239913	1240461	549	1240147	1390.76	44.7081	1.49652	42.4592	NA_peak_76
NC_000962.3	1240741	1241184	444	1240917	1339.51	45.084	1.51129	42.8276	NA_peak_77
NC_000962.3	1271992	1272250	259	1272182	935.39	6.7545	1.18621	5.22616	NA_peak_78
NC_000962.3	1305886	1306172	287	1306072	852.59	19.3121	1.38796	17.5294	NA_peak_79
NC_000962.3	1313150	1313752	603	1313549	1005.37	29.9075	1.46701	27.9442	NA_peak_80
NC_000962.3	1324448	1324681	234	1324593	1172.93	7.11557	1.17042	5.57635	NA_peak_81
NC_000962.3	1325162	1325811	650	1325453	1291.21	25.6058	1.3608	23.7197	NA_peak_82
NC_000962.3	1327438	1327644	207	1327476	704.75	5.37147	1.18812	3.89068	NA_peak_83
NC_000962.3	1342837	1343039	203	1342959	812.18	6.04992	1.18713	4.54408	NA_peak_84
NC_000962.3	1364427	1364629	203	1364516	933.42	7.82621	1.20508	6.26701	NA_peak_85
NC_000962.3	1372260	1372518	259	1372422	785.57	5.61618	1.1821	4.12614	NA_peak_86
NC_000962.3	1413001	1413323	323	1413195	789.51	15.777	1.35594	14.0564	NA_peak_87
NC_000962.3	1453014	1453394	381	1453180	687	9.53237	1.27697	7.93362	NA_peak_88
NC_000962.3	1460485	1461572	1088	1460881	1032.97	19.4017	1.34667	17.6176	NA_peak_89
NC_000962.3	1471442	1477674	6233	1475977	2471.05	187.875	1.91929	184.06	NA_peak_90
NC_000962.3	1504429	1504976	548	1504933	926.52	8.41582	1.21594	6.84193	NA_peak_91
NC_000962.3	1524355	1525405	1051	1524615	894.98	25.4109	1.45215	23.5281	NA_peak_92
NC_000962.3	1546976	1547414	439	1547231	934.4	11.6185	1.26406	9.97677	NA_peak_93
NC_000962.3	1561352	1561717	366	1561580	684.05	4.83977	1.17706	3.3804	NA_peak_94
NC_000962.3	1564372	1564692	321	1564508	1062.54	4.23208	1.12783	2.80018	NA_peak_95
NC_000962.3	1565321	1565544	224	1565426	1111.82	6.92285	1.17238	5.38909	NA_peak_96
NC_000962.3	1573744	1574208	465	1573936	954.12	37.2845	1.56065	35.1774	NA_peak_97
NC_000962.3	1574292	1574744	453	1574486	741.22	14.6692	1.35194	12.9688	NA_peak_98
NC_000962.3	1647064	1647802	739	1647585	924.55	30.0944	1.49523	28.1278	NA_peak_99
NC_000962.3	1679158	1680431	1274	1679418	1588.88	45.7041	1.46263	43.4358	NA_peak_100
NC_000962.3	1690851	1697773	6923	1692798	1917.11	77.3412	1.58129	74.4554	NA_peak_101
NC_000962.3	1699805	1701190	1386	1700800	1206.45	30.7368	1.42388	28.7582	NA_peak_102
NC_000962.3	1712161	1713025	865	1712439	1089.15	31.1706	1.45587	29.1835	NA_peak_103
NC_000962.3	1714783	1715712	930	1715101	1201.52	31.2675	1.42987	29.2785	NA_peak_104
NC_000962.3	1735353	1736696	1344	1735639	1894.44	219.127	2.28311	214.987	NA_peak_105
NC_000962.3	1751436	1751804	369	1751660	906.81	13.5209	1.29687	11.8421	NA_peak_106
NC_000962.3	1752115	1752467	353	1752298	925.53	14.1319	1.30131	12.4418	NA_peak_107
NC_000962.3	1788284	1788490	207	1788363	781.63	7.11225	1.21338	5.57311	NA_peak_108
NC_000962.3	1833516	1833928	413	1833652	787.54	12.3185	1.30337	10.6631	NA_peak_109
NC_000962.3	1851942	1852524	583	1852068	1009.31	18.3502	1.33817	16.5836	NA_peak_110
NC_000962.3	1855537	1855844	308	1855648	1132.52	15.3713	1.28226	13.6579	NA_peak_111
NC_000962.3	1890589	1891309	721	1891171	786.56	20.8689	1.42932	19.0609	NA_peak_112
NC_000962.3	1934836	1935164	329	1934893	660.39	6.80392	1.22758	5.27388	NA_peak_113
NC_000962.3	1982263	1982914	652	1982721	1287.27	93.7163	1.88344	90.6073	NA_peak_114
NC_000962.3	1983322	1984131	810	1983605	1168.99	41.5244	1.5294	39.3366	NA_peak_115
NC_000962.3	1993079	1993398	320	1993217	824.01	9.95708	1.25649	8.34941	NA_peak_116
NC_000962.3	2017614	2017843	230	2017714	786.56	7.85549	1.22672	6.29572	NA_peak_117
NC_000962.3	2027499	2027705	207	2027603	821.05	10.5576	1.26704	8.93759	NA_peak_118
NC_000962.3	2064438	2064906	469	2064744	818.1	5.67611	1.17856	4.1836	NA_peak_119
NC_000962.3	2074050	2074329	280	2074281	1326.7	10.3772	1.20154	8.76107	NA_peak_120
NC_000962.3	2121388	2123325	1938	2121909	2290.67	68.7539	1.4785	66.0245	NA_peak_121
NC_000962.3	2126058	2126278	221	2126101	1200.53	4.48496	1.1244	3.04096	NA_peak_122
NC_000962.3	2134656	2135376	721	2135302	1335.57	6.75959	1.15321	5.23111	NA_peak_123
NC_000962.3	2135809	2136264	456	2135888	1279.39	8.58096	1.18226	7.00312	NA_peak_124
NC_000962.3	2139787	2140042	256	2140008	772.76	4.35154	1.15521	2.91362	NA_peak_125
NC_000962.3	2150691	2151164	474	2151060	1206.45	15.894	1.27772	14.1711	NA_peak_126
NC_000962.3	2163305	2163798	494	2163637	1142.38	39.2586	1.51642	37.1139	NA_peak_127
NC_000962.3	2164073	2164650	578	2164644	1147.31	3.14632	1.09991	1.77942	NA_peak_128
NC_000962.3	2165542	2166085	544	2165702	1283.33	31.7066	1.41602	29.7092	NA_peak_129
NC_000962.3	2167299	2167643	345	2167598	807.25	6.77085	1.20229	5.242	NA_peak_130
NC_000962.3	2168268	2169950	1683	2168677	1510.03	83.5811	1.72295	80.5839	NA_peak_131
NC_000962.3	2170577	2171159	583	2170845	1082.25	58.9965	1.7113	56.4721	NA_peak_132
NC_000962.3	2198650	2199268	619	2199134	717.56	13.0889	1.33369	11.4186	NA_peak_133
NC_000962.3	2223082	2223435	354	2223337	780.64	5.2109	1.17399	3.7362	NA_peak_134
NC_000962.3	2268074	2268854	781	2268387	1155.19	40.502	1.52331	38.334	NA_peak_135
NC_000962.3	2306772	2307080	309	2307080	747.13	2.62961	1.10998	1.30456	NA_peak_136
NC_000962.3	2324927	2325830	904	2325681	1027.06	21.3734	1.36892	19.5572	NA_peak_137
NC_000962.3	2337504	2337769	266	2337673	820.07	4.31497	1.14835	2.87871	NA_peak_138
NC_000962.3	2366800	2367836	1037	2366947	1031	40.801	1.56839	38.6274	NA_peak_139
NC_000962.3	2374088	2374533	446	2374435	1127.59	8.82704	1.19936	7.24361	NA_peak_140
NC_000962.3	2396568	2397486	919	2397166	1150.26	12.5653	1.24596	10.9051	NA_peak_141
NC_000962.3	2404294	2404687	394	2404427	1150.26	4.42142	1.12582	2.98031	NA_peak_142
NC_000962.3	2405263	2405680	418	2405491	1383.87	19.0398	1.28753	17.2615	NA_peak_143
NC_000962.3	2407343	2407610	268	2407470	1159.13	15.4595	1.27898	13.7446	NA_peak_144
NC_000962.3	2420335	2420740	406	2420532	1676.61	20.7591	1.27091	18.9529	NA_peak_145
NC_000962.3	2422661	2423262	602	2423076	1867.82	31.1388	1.32729	29.1524	NA_peak_146
NC_000962.3	2437639	2437890	252	2437774	698.83	5.9489	1.20246	4.4464	NA_peak_147
NC_000962.3	2443218	2443437	220	2443388	788.53	4.92986	1.16656	3.46657	NA_peak_148
NC_000962.3	2444920	2445180	261	2445016	917.65	5.03295	1.15553	3.56541	NA_peak_149
NC_000962.3	2453043	2453527	485	2453315	1146.32	35.5958	1.48233	33.522	NA_peak_150
NC_000962.3	2463980	2464481	502	2464058	1495.24	10.5793	1.19033	8.95889	NA_peak_151
NC_000962.3	2469259	2469501	243	2469330	1097.04	7.75414	1.18579	6.19692	NA_peak_152
NC_000962.3	2518114	2518396	283	2518326	1446.95	6.85384	1.14825	5.32228	NA_peak_153
NC_000962.3	2519333	2519671	339	2519387	1350.35	8.60375	1.17714	7.0254	NA_peak_154
NC_000962.3	2562813	2563083	271	2562905	641.66	4.00125	1.16214	2.58106	NA_peak_155
NC_000962.3	2564982	2565313	332	2565134	777.68	17.7127	1.38803	15.9578	NA_peak_156
NC_000962.3	2566807	2567010	204	2566884	840.77	4.22388	1.14526	2.79237	NA_peak_157
NC_000962.3	2579146	2580033	888	2579819	1146.32	51.1352	1.61777	48.7648	NA_peak_158
NC_000962.3	2610621	2612103	1483	2611792	1753.49	50.2687	1.46207	47.915	NA_peak_159
NC_000962.3	2612867	2614460	1594	2613721	2172.39	137.976	1.80305	134.568	NA_peak_160
NC_000962.3	2614572	2615784	1213	2615311	1811.64	56.1641	1.48699	53.7	NA_peak_161
NC_000962.3	2616073	2617220	1148	2616740	1870.78	63.5731	1.51807	60.9432	NA_peak_162
NC_000962.3	2626831	2627113	283	2627041	1051.7	4.95797	1.14299	3.49352	NA_peak_163
NC_000962.3	2631765	2632061	297	2631902	1016.21	15.5014	1.30205	13.7856	NA_peak_164
NC_000962.3	2632317	2632573	257	2632500	1004.39	8.93854	1.21423	7.35257	NA_peak_165
NC_000962.3	2633075	2633298	224	2633223	1738.7	7.35846	1.14004	5.81219	NA_peak_166
NC_000962.3	2633955	2635464	1510	2634062	1689.42	18.0866	1.24754	16.3249	NA_peak_167
NC_000962.3	2637607	2638809	1203	2638552	1355.28	40.3223	1.4707	38.1577	NA_peak_168
NC_000962.3	2655209	2655534	326	2655395	1151.25	10.2163	1.21571	8.60338	NA_peak_169
NC_000962.3	2675730	2675954	225	2675853	637.72	4.25428	1.16982	2.82117	NA_peak_170
NC_000962.3	2684544	2685050	507	2684760	1075.35	8.79447	1.20398	7.21166	NA_peak_171
NC_000962.3	2691965	2692889	925	2692199	2152.68	125.108	1.75295	121.777	NA_peak_172
NC_000962.3	2710170	2710471	302	2710250	883.15	8.01688	1.21449	6.45301	NA_peak_173
NC_000962.3	2744767	2745192	426	2745016	942.29	8.73441	1.21872	7.15299	NA_peak_174
NC_000962.3	2759457	2759774	318	2759619	1181.81	11.0288	1.22368	9.39931	NA_peak_175
NC_000962.3	2765388	2765595	208	2765536	1069.44	7.28333	1.1815	5.73914	NA_peak_176
NC_000962.3	2806742	2808119	1378	2806966	1442.02	69.5367	1.65484	66.7931	NA_peak_177
NC_000962.3	2847619	2847823	205	2847655	1135.48	4.93374	1.13648	3.47034	NA_peak_178
NC_000962.3	2849191	2849755	565	2849504	1444.98	23.8704	1.32318	22.0134	NA_peak_179
NC_000962.3	2866600	2867083	484	2866722	752.06	8.76245	1.24885	7.18048	NA_peak_180
NC_000962.3	2867375	2867728	354	2867559	856.54	24.5093	1.45296	22.6421	NA_peak_181
NC_000962.3	2935457	2935977	521	2935676	782.61	6.91313	1.20928	5.37967	NA_peak_182
NC_000962.3	2936082	2936334	253	2936230	732.34	7.48344	1.22838	5.9335	NA_peak_183
NC_000962.3	2959114	2959930	817	2959597	1081.27	20.0223	1.3431	18.2279	NA_peak_184
NC_000962.3	2969481	2969986	506	2969715	1025.09	6.21592	1.16733	4.70442	NA_peak_185
NC_000962.3	2979148	2979453	306	2979359	704.75	11.4811	1.3099	9.84214	NA_peak_186
NC_000962.3	3011445	3011953	509	3011838	924.55	9.10907	1.22752	7.5193	NA_peak_187
NC_000962.3	3046939	3048682	1744	3047437	1391.75	50.541	1.53895	48.1823	NA_peak_188
NC_000962.3	3058476	3058719	244	3058561	893.99	6.97521	1.19587	5.44009	NA_peak_189
NC_000962.3	3058789	3059370	582	3059012	916.66	7.91465	1.20904	6.35334	NA_peak_190
NC_000962.3	3077955	3078239	285	3078074	837.81	14.9347	1.33187	13.2291	NA_peak_191
NC_000962.3	3147812	3148269	458	3147926	899.91	9.79482	1.24263	8.19052	NA_peak_192
NC_000962.3	3152905	3153157	253	3153068	756.99	3.73982	1.14189	2.33465	NA_peak_193
NC_000962.3	3214388	3214728	341	3214497	887.09	7.51004	1.20501	5.95941	NA_peak_194
NC_000962.3	3242126	3243061	936	3242871	1566.21	42.7002	1.44577	40.4899	NA_peak_195
NC_000962.3	3243375	3244551	1177	3243920	1432.16	36.3736	1.42461	34.2842	NA_peak_196
NC_000962.3	3273289	3273509	221	3273508	683.06	3.25002	1.13443	1.87594	NA_peak_197
NC_000962.3	3273566	3273935	370	3273769	766.84	10.958	1.28617	9.33005	NA_peak_198
NC_000962.3	3274083	3274494	412	3274245	815.14	10.4962	1.2673	8.87758	NA_peak_199
NC_000962.3	3283496	3284286	791	3283886	1160.12	38.6621	1.5056	36.528	NA_peak_200
NC_000962.3	3284588	3285266	679	3284886	1124.64	30.6776	1.44275	28.7001	NA_peak_201
NC_000962.3	3298928	3299533	606	3299189	1105.91	22.8937	1.36994	21.0528	NA_peak_202
NC_000962.3	3299849	3300933	1085	3300402	1492.29	47.2278	1.4915	44.9309	NA_peak_203
NC_000962.3	3301448	3302298	851	3301661	1424.28	42.6143	1.473	40.4057	NA_peak_204
NC_000962.3	3308624	3309518	895	3309155	1115.77	36.1906	1.49701	34.1048	NA_peak_205
NC_000962.3	3311858	3313031	1174	3312132	1321.77	63.2387	1.6514	60.617	NA_peak_206
NC_000962.3	3348459	3348874	416	3348749	736.29	10.5537	1.28492	8.93373	NA_peak_207
NC_000962.3	3377351	3377662	312	3377504	1109.85	48.0189	1.60528	45.7075	NA_peak_208
NC_000962.3	3378961	3379362	402	3379013	867.38	12.4579	1.2884	10.7999	NA_peak_209
NC_000962.3	3379799	3380097	299	3379936	1071.41	34.9487	1.49778	32.8881	NA_peak_210
NC_000962.3	3414531	3414903	373	3414740	1133.51	17.1613	1.30253	15.4163	NA_peak_211
NC_000962.3	3477419	3480060	2642	3478182	1275.44	37.7812	1.46886	35.6643	NA_peak_212
NC_000962.3	3483070	3483302	233	3483291	694.89	4.20478	1.16098	2.77415	NA_peak_213
NC_000962.3	3485222	3485679	458	3485417	1087.18	23.6722	1.38094	21.8185	NA_peak_214
NC_000962.3	3487207	3487751	545	3487519	1409.49	37.6757	1.43928	35.5609	NA_peak_215
NC_000962.3	3489629	3490518	890	3489921	1241.93	30.4116	1.41403	28.439	NA_peak_216
NC_000962.3	3511168	3511556	389	3511420	717.56	13.0889	1.33369	11.4186	NA_peak_217
NC_000962.3	3527465	3528531	1067	3527886	1071.41	22.7142	1.37453	20.8762	NA_peak_218
NC_000962.3	3559152	3559536	385	3559308	864.42	13.291	1.30139	11.6168	NA_peak_219
NC_000962.3	3583491	3583879	389	3583781	939.33	13.3074	1.28707	11.6328	NA_peak_220
NC_000962.3	3595469	3595926	458	3595663	1230.1	25.3843	1.36941	23.5019	NA_peak_221
NC_000962.3	3597738	3598103	366	3597948	811.2	6.99017	1.2059	5.45466	NA_peak_222
NC_000962.3	3700599	3701114	516	3700776	880.19	21.334	1.40541	19.5184	NA_peak_223
NC_000962.3	3730931	3731464	534	3731216	1994.97	46.539	1.40562	44.2543	NA_peak_224
NC_000962.3	3732754	3733587	834	3733281	1403.58	47.6954	1.51519	45.39	NA_peak_225
NC_000962.3	3733992	3735595	1604	3734340	1448.92	71.4408	1.66657	68.6671	NA_peak_226
NC_000962.3	3749599	3749866	268	3749722	1103.94	10.3942	1.22417	8.77767	NA_peak_227
NC_000962.3	3751301	3751744	444	3751517	1171.95	34.4453	1.46619	32.3947	NA_peak_228
NC_000962.3	3752158	3752653	496	3752444	998.47	16.6794	1.32031	14.9427	NA_peak_229
NC_000962.3	3761766	3762112	347	3761928	1208.42	17.2464	1.29211	15.5	NA_peak_230
NC_000962.3	3763522	3763858	337	3763671	1124.64	12.8746	1.25349	11.2084	NA_peak_231
NC_000962.3	3765112	3765692	581	3765397	1443.99	48.8784	1.51466	46.5514	NA_peak_232
NC_000962.3	3765975	3766426	452	3766160	1046.77	15.1303	1.29303	13.4211	NA_peak_233
NC_000962.3	3790995	3793403	2409	3791753	1511.02	48.6614	1.49704	46.3386	NA_peak_234
NC_000962.3	3798358	3799179	822	3798950	871.32	39.3491	1.61908	37.2025	NA_peak_235
NC_000962.3	3831734	3831969	236	3831830	981.72	6.27583	1.17325	4.76235	NA_peak_236
NC_000962.3	3834403	3835116	714	3834582	1182.79	17.6952	1.30115	15.9406	NA_peak_237
NC_000962.3	3842270	3843608	1339	3842439	1189.69	33.6013	1.45383	31.5676	NA_peak_238
NC_000962.3	3847272	3847667	396	3847366	760.93	19.1127	1.41418	17.3332	NA_peak_239
NC_000962.3	3879907	3880340	434	3880276	1005.37	4.69735	1.14101	3.24391	NA_peak_240
NC_000962.3	3880543	3881079	537	3880601	1141.39	20.0925	1.33301	18.2969	NA_peak_241
NC_000962.3	3893737	3894431	695	3894276	1712.09	35.279	1.37267	33.2115	NA_peak_242
NC_000962.3	3894618	3894889	272	3894790	1397.66	9.10166	1.18031	7.51204	NA_peak_243
NC_000962.3	3895357	3896051	695	3895733	1928.93	67.1398	1.52685	64.4361	NA_peak_244
NC_000962.3	3907012	3907702	691	3907547	1870.78	105.032	1.73345	101.827	NA_peak_245
NC_000962.3	3964506	3965226	721	3964803	704.75	11.4811	1.3099	9.84214	NA_peak_246
NC_000962.3	4024161	4024404	244	4024348	1060.57	4.93284	1.14172	3.46946	NA_peak_247
NC_000962.3	4024779	4025292	514	4025039	1365.14	21.1986	1.30931	19.3852	NA_peak_248
NC_000962.3	4040511	4040951	441	4040673	1282.34	11.31	1.21644	9.67464	NA_peak_249
NC_000962.3	4041191	4041608	418	4041363	1446.95	41.6431	1.46198	39.4532	NA_peak_250
NC_000962.3	4041873	4042217	345	4042071	1339.51	15.2954	1.25516	13.5835	NA_peak_251
NC_000962.3	4053817	4057615	3799	4054675	2877.14	244.026	2.00121	239.145	NA_peak_252
NC_000962.3	4062130	4062568	439	4062382	1374.99	66.7695	1.65902	64.0717	NA_peak_253
NC_000962.3	4087058	4087342	285	4087304	717.56	6.34598	1.20766	4.83047	NA_peak_254
NC_000962.3	4099194	4099620	427	4099363	1361.19	31.2493	1.39712	29.2607	NA_peak_255
NC_000962.3	4100492	4101271	780	4100789	2133.95	200.234	2.08288	196.274	NA_peak_256
NC_000962.3	4119086	4119701	616	4119397	1634.22	90.9855	1.7271	87.9087	NA_peak_257
NC_000962.3	4120074	4120289	216	4120172	1082.25	7.69291	1.1865	6.13716	NA_peak_258
NC_000962.3	4128759	4129265	507	4129140	1083.24	26.0292	1.40628	24.1365	NA_peak_259
NC_000962.3	4168195	4168473	279	4168378	1049.73	7.12211	1.18112	5.58267	NA_peak_260
NC_000962.3	4198252	4198734	483	4198410	1345.42	15.9031	1.2607	14.18	NA_peak_261
NC_000962.3	4216860	4217082	223	4217034	744.17	6.67768	1.2097	5.15168	NA_peak_262
NC_000962.3	4224776	4225126	351	4224951	1121.68	15.3107	1.28336	13.5984	NA_peak_263
NC_000962.3	4231018	4231278	261	4231136	970.87	8.61291	1.21393	7.03437	NA_peak_264
NC_000962.3	4263001	4263398	398	4263201	1556.36	33.5412	1.38284	31.5086	NA_peak_265
NC_000962.3	4265841	4266129	289	4266026	1179.83	6.51149	1.16041	4.9908	NA_peak_266
NC_000962.3	4266566	4266765	200	4266691	1187.72	13.7214	1.25578	12.0389	NA_peak_267
NC_000962.3	4284479	4284724	246	4284618	836.82	9.42722	1.24673	7.83084	NA_peak_268
NC_000962.3	4285280	4285693	414	4285420	1005.37	13.6445	1.28037	11.9634	NA_peak_269
NC_000962.3	4286733	4287683	951	4287501	1130.55	8.11058	1.1886	6.54432	NA_peak_270
NC_000962.3	4287820	4288357	538	4287931	1201.52	15.7701	1.2771	14.0495	NA_peak_271
NC_000962.3	4288527	4289287	761	4288858	1536.64	27.2455	1.33824	25.3326	NA_peak_272
NC_000962.3	4290429	4290978	550	4290716	1685.48	23.9818	1.2953	22.123	NA_peak_273
NC_000962.3	4291457	4292445	989	4291815	1658.86	35.8109	1.38437	33.7327	NA_peak_274
NC_000962.3	4292567	4292839	273	4292735	1235.03	5.86828	1.14553	4.36869	NA_peak_275
NC_000962.3	4299354	4301265	1912	4300404	1380.91	50.9222	1.54472	48.556	NA_peak_276
NC_000962.3	4313845	4314486	642	4314168	1711.1	63.7119	1.54942	61.0786	NA_peak_277
NC_000962.3	4317292	4317505	214	4317397	812.18	4.75689	1.15947	3.30092	NA_peak_278
NC_000962.3	4320416	4320689	274	4320576	786.56	7.95762	1.22864	6.3953	NA_peak_279
NC_000962.3	4321009	4321673	665	4321504	864.42	21.1875	1.40857	19.3744	NA_peak_280
NC_000962.3	4323714	4324147	434	4323802	1060.57	5.87676	1.15892	4.37688	NA_peak_281
NC_000962.3	4340008	4340831	824	4340330	1294.17	43.6679	1.51128	41.4388	NA_peak_282
NC_000962.3	4341366	4341739	374	4341544	933.42	9.12014	1.22627	7.53014	NA_peak_283
NC_000962.3	4350438	4350876	439	4350624	1292.2	21.0785	1.31851	19.2672	NA_peak_284
NC_000962.3	4352513	4352972	460	4352609	1361.19	5.91858	1.13896	4.41703	NA_peak_285
NC_000962.3	4359261	4359678	418	4359490	1536.64	40.4928	1.43624	38.3248	NA_peak_286
NC_000962.3	4360067	4360336	270	4360197	1431.18	10.7964	1.19747	9.17172	NA_peak_287
NC_000962.3	4361855	4362090	236	4361985	1114.78	7.72038	1.18448	6.16397	NA_peak_288
NC_000962.3	4371405	4371947	543	4371713	1615.49	84.0048	1.69266	81.0029	NA_peak_289
NC_000962.3	4372358	4372929	572	4372577	1486.37	48.165	1.49937	45.8509	NA_peak_290
NC_000962.3	4373839	4374053	215	4373968	974.82	8.46368	1.21099	6.88883	NA_peak_291
NC_000962.3	4374113	4374367	255	4374238	995.52	6.71287	1.17931	5.18576	NA_peak_292
NC_000962.3	4385829	4386450	622	4386066	1332.61	42.9543	1.49676	40.739	NA_peak_293
NC_000962.3	4387113	4388478	1366	4387448	1556.36	79.8975	1.68581	76.9585	NA_peak_294
NC_000962.3	4410894	4411402	509	4411305	1696.32	42.6852	1.42393	40.4754	NA_peak_295

## Sheet: glucose Replicate 2
# This file is generated by MACS version 2.2.6
# Command line: callpeak -t G2_ChIP_S8_R1_001.sorted.bam -c G2_Inp_S2_R1_001.sorted.bam -g 4411532 --mfold 2 80 -s 50 --nomodel --keep-dup all --outdir ../macs_out/single_sample/G2/
# ARGUMENTS LIST:
# name = NA
# format = AUTO
# ChIP-seq file = ['G2_ChIP_S8_R1_001.sorted.bam']
# control file = ['G2_Inp_S2_R1_001.sorted.bam']
# effective genome size = 4.41e+06
# band width = 300
# model fold = [2, 80]
# qvalue cutoff = 5.00e-02
# The maximum gap between significant sites is assigned as the read length/tag size.
# The minimum length of peaks is assigned as the predicted fragment length "d".
# Larger dataset will be scaled towards smaller dataset.
# Range for calculating regional lambda is: 1000 bps and 10000 bps
# Broad region calling is off
# Paired-End mode is off
# tag size is determined as 50 bps
# total tags in treatment: 9997445
# total tags in control: 13315031
# d = 200
chr	start	end	length	abs_summit	pileup	#NAME?	fold_enrichment	#NAME?	name
NC_000962.3	25540	25865	326	25635	1051	7.21553	1.18163	5.67681	NA_peak_1
NC_000962.3	33738	34386	649	34229	989	48.3077	1.65575	45.987	NA_peak_2
NC_000962.3	34988	35495	508	35184	1145	59.5253	1.68776	56.9864	NA_peak_3
NC_000962.3	42905	43183	279	43058	606	9.18262	1.29074	7.5875	NA_peak_4
NC_000962.3	50456	51002	547	50761	1242	39.7347	1.49259	37.5699	NA_peak_5
NC_000962.3	57904	58287	384	58105	3513	60.8474	1.33896	58.2866	NA_peak_6
NC_000962.3	79041	79349	309	79217	725	20.6041	1.44676	18.7839	NA_peak_7
NC_000962.3	105841	106188	348	105941	615	9.23307	1.28929	7.63638	NA_peak_8
NC_000962.3	106719	107032	314	106872	633	11.7249	1.33325	10.0689	NA_peak_9
NC_000962.3	130517	130830	314	130640	735	8.67581	1.25041	7.09461	NA_peak_10
NC_000962.3	135780	138050	2271	137618	1218	41.779	1.51599	39.5772	NA_peak_11
NC_000962.3	186748	187234	487	186982	8750	58.7901	1.19546	56.265	NA_peak_12
NC_000962.3	194876	195182	307	195052	976	8.6978	1.21344	7.116	NA_peak_13
NC_000962.3	196536	197011	476	196837	1060	17.7921	1.32147	16.0202	NA_peak_14
NC_000962.3	202375	202608	234	202475	1191	9.19131	1.19768	7.59596	NA_peak_15
NC_000962.3	225731	226179	449	225884	1076	17.277	1.31267	15.5141	NA_peak_16
NC_000962.3	226513	227013	501	226750	1180	31.772	1.43864	29.7489	NA_peak_17
NC_000962.3	296376	297158	783	296629	864	15.5413	1.33287	13.8101	NA_peak_18
NC_000962.3	300974	301292	319	301179	734	14.9858	1.35859	13.2658	NA_peak_19
NC_000962.3	301383	301971	589	301566	764	11.6829	1.29736	10.0279	NA_peak_20
NC_000962.3	308862	309141	280	308862	630	2.6253	1.12003	1.31698	NA_peak_21
NC_000962.3	323014	323338	325	323154	950	8.38386	1.21166	6.81083	NA_peak_22
NC_000962.3	331577	332003	427	331867	738	26.8766	1.52942	24.9412	NA_peak_23
NC_000962.3	339011	339435	425	339287	929	11.21	1.25833	9.56487	NA_peak_24
NC_000962.3	339931	340308	378	340108	1008	18.6954	1.34204	16.9075	NA_peak_25
NC_000962.3	370210	371135	926	370810	1159	13.3978	1.25469	11.7097	NA_peak_26
NC_000962.3	371361	372319	959	371572	1412	52.1992	1.54465	49.7953	NA_peak_27
NC_000962.3	372628	373827	1200	372962	1255	37.1962	1.46822	35.076	NA_peak_28
NC_000962.3	409312	410498	1187	409723	1056	49.913	1.64164	47.5584	NA_peak_29
NC_000962.3	410643	411061	419	410832	912	7.89356	1.20832	6.33429	NA_peak_30
NC_000962.3	431843	433222	1380	432428	1050	21.8545	1.36919	20.0125	NA_peak_31
NC_000962.3	483621	487174	3554	485775	1722	60.3705	1.52747	57.8174	NA_peak_32
NC_000962.3	488924	489947	1024	489312	993	44.6467	1.61854	42.3949	NA_peak_33
NC_000962.3	538808	540327	1520	540137	1554	30.1695	1.35775	28.1743	NA_peak_34
NC_000962.3	540440	542232	1793	541707	1621	73.7675	1.62997	70.9911	NA_peak_35
NC_000962.3	545034	545719	686	545398	949	19.6045	1.36587	17.8013	NA_peak_36
NC_000962.3	547413	547664	252	547512	621	5.47219	1.2029	3.99585	NA_peak_37
NC_000962.3	559580	560771	1192	560637	1527	28.1068	1.34564	26.1494	NA_peak_38
NC_000962.3	577636	578010	375	577789	767	7.39363	1.22011	5.84916	NA_peak_39
NC_000962.3	591323	591574	252	591436	914	5.16489	1.15768	3.70156	NA_peak_40
NC_000962.3	592610	592947	338	592748	1062	20.1758	1.34816	18.3628	NA_peak_41
NC_000962.3	597886	598200	315	598027	1122	9.15659	1.20391	7.5622	NA_peak_42
NC_000962.3	598375	599881	1507	599586	1586	85.9689	1.71265	83.0125	NA_peak_43
NC_000962.3	602150	602406	257	602286	826	7.40214	1.21126	5.85746	NA_peak_44
NC_000962.3	623434	624051	618	623660	907	11.5613	1.26718	9.9088	NA_peak_45
NC_000962.3	675234	675470	237	675414	551	5.23444	1.2105	3.76796	NA_peak_46
NC_000962.3	676045	676244	200	676119	614	6.53131	1.22998	5.01558	NA_peak_47
NC_000962.3	731364	731603	240	731455	795	8.74994	1.24073	7.16693	NA_peak_48
NC_000962.3	733291	733701	411	733404	1114	9.73923	1.21291	8.12968	NA_peak_49
NC_000962.3	748068	748309	242	748178	835	5.38651	1.17038	3.91374	NA_peak_50
NC_000962.3	759341	759870	530	759657	1011	42.3332	1.5888	40.121	NA_peak_51
NC_000962.3	778739	779093	355	778971	891	12.3779	1.28209	10.7089	NA_peak_52
NC_000962.3	781274	781627	354	781461	1109	20.3763	1.34135	18.5597	NA_peak_53
NC_000962.3	800099	800549	451	800402	626	14.1524	1.38032	12.4492	NA_peak_54
NC_000962.3	847955	849693	1739	848408	1562	71.7222	1.63354	68.978	NA_peak_55
NC_000962.3	850085	850631	547	850300	1028	9.66599	1.22174	8.0583	NA_peak_56
NC_000962.3	885648	885900	253	885769	648	6.33456	1.21856	4.82574	NA_peak_57
NC_000962.3	899675	900045	371	899838	645	11.5267	1.32583	9.87492	NA_peak_58
NC_000962.3	904899	905224	326	905088	1095	8.498	1.19713	6.92184	NA_peak_59
NC_000962.3	925358	925762	405	925705	775	4.81822	1.16474	3.37101	NA_peak_60
NC_000962.3	965712	966042	331	965956	1093	6.1707	1.16068	4.66756	NA_peak_61
NC_000962.3	1039674	1040126	453	1039978	1017	43.7145	1.59972	41.4792	NA_peak_62
NC_000962.3	1065801	1066100	300	1065987	689	7.91486	1.24466	6.355	NA_peak_63
NC_000962.3	1091071	1091321	251	1091201	576	7.87169	1.27025	6.31304	NA_peak_64
NC_000962.3	1093040	1093244	205	1093121	800	9.76081	1.25753	8.15067	NA_peak_65
NC_000962.3	1101784	1106487	4704	1104745	1887	79.6231	1.59923	76.7512	NA_peak_66
NC_000962.3	1113360	1113619	260	1113393	736	3.63281	1.13959	2.24861	NA_peak_67
NC_000962.3	1123456	1123769	314	1123611	941	18.8025	1.35789	17.0128	NA_peak_68
NC_000962.3	1127817	1128041	225	1127904	1008	10.6883	1.23909	9.05516	NA_peak_69
NC_000962.3	1178837	1179417	581	1179254	680	22.4228	1.4929	20.5705	NA_peak_70
NC_000962.3	1190356	1190749	394	1190586	1128	35.592	1.4868	33.5	NA_peak_71
NC_000962.3	1192031	1192460	430	1192298	1090	35.8988	1.50056	33.8015	NA_peak_72
NC_000962.3	1196169	1197562	1394	1197215	1711	67.0017	1.56846	64.3379	NA_peak_73
NC_000962.3	1204075	1204322	248	1204132	721	7.36215	1.22731	5.81856	NA_peak_74
NC_000962.3	1205746	1206083	338	1205966	747	4.34094	1.1566	2.91757	NA_peak_75
NC_000962.3	1214200	1214608	409	1214417	1408	63.2594	1.62286	60.6605	NA_peak_76
NC_000962.3	1214912	1215396	485	1215106	1138	27.3644	1.40677	25.42	NA_peak_77
NC_000962.3	1240000	1240415	416	1240159	1238	43.8411	1.52745	41.6037	NA_peak_78
NC_000962.3	1240745	1241146	402	1240968	1191	55.3985	1.6361	52.933	NA_peak_79
NC_000962.3	1271876	1272157	282	1272030	771	4.87969	1.16662	3.42963	NA_peak_80
NC_000962.3	1287041	1287385	345	1287266	638	10.5382	1.30904	8.90887	NA_peak_81
NC_000962.3	1291739	1292220	482	1292115	643	12.6876	1.34789	11.0127	NA_peak_82
NC_000962.3	1305886	1306126	241	1306055	675	9.64051	1.28191	8.03345	NA_peak_83
NC_000962.3	1313188	1313961	774	1313531	928	38.7186	1.58599	36.572	NA_peak_84
NC_000962.3	1324938	1325759	822	1325569	1227	44.4802	1.53578	42.2313	NA_peak_85
NC_000962.3	1327379	1327618	240	1327500	589	5.02533	1.19724	3.56849	NA_peak_86
NC_000962.3	1365664	1366042	379	1365738	878	7.05427	1.19784	5.52055	NA_peak_87
NC_000962.3	1412977	1413336	360	1413195	733	24.3052	1.49629	22.4186	NA_peak_88
NC_000962.3	1452969	1453181	213	1453080	563	6.53226	1.24163	5.01627	NA_peak_89
NC_000962.3	1460233	1460506	274	1460333	811	5.35786	1.17252	3.88623	NA_peak_90
NC_000962.3	1460584	1461268	685	1460852	988	37.0981	1.54576	34.9794	NA_peak_91
NC_000962.3	1471478	1477494	6017	1475977	2273	197.24	2.01728	193.586	NA_peak_92
NC_000962.3	1504673	1504916	244	1504814	806	7.86533	1.22285	6.30706	NA_peak_93
NC_000962.3	1524328	1525388	1061	1525088	771	34.5911	1.61326	32.517	NA_peak_94
NC_000962.3	1546977	1547646	670	1547150	734	3.85929	1.14581	2.462	NA_peak_95
NC_000962.3	1561300	1561939	640	1561597	581	8.41977	1.28126	6.84558	NA_peak_96
NC_000962.3	1564276	1564702	427	1564503	987	11.1106	1.24805	9.46772	NA_peak_97
NC_000962.3	1573622	1574237	616	1573978	736	25.1736	1.50702	23.2717	NA_peak_98
NC_000962.3	1574319	1574805	487	1574528	694	25.4008	1.53002	23.4944	NA_peak_99
NC_000962.3	1612861	1613133	273	1613017	570	7.23805	1.25704	5.69845	NA_peak_100
NC_000962.3	1646931	1647718	788	1647518	802	27.0584	1.5039	25.1195	NA_peak_101
NC_000962.3	1679183	1680428	1246	1679446	1308	36.8971	1.45363	34.7816	NA_peak_102
NC_000962.3	1691026	1694707	3682	1692824	1646	86.4889	1.69736	83.526	NA_peak_103
NC_000962.3	1694850	1697834	2985	1697421	1461	84.7364	1.74737	81.7951	NA_peak_104
NC_000962.3	1699812	1701180	1369	1700852	1044	38.9447	1.54413	36.7938	NA_peak_105
NC_000962.3	1712192	1713090	899	1712474	916	23.9191	1.4262	22.0394	NA_peak_106
NC_000962.3	1714828	1715677	850	1715074	1032	40.6392	1.56459	38.4585	NA_peak_107
NC_000962.3	1735355	1736705	1351	1735721	1911	291.984	2.63575	287.322	NA_peak_108
NC_000962.3	1751529	1751838	310	1751719	719	12.9269	1.32938	11.2476	NA_peak_109
NC_000962.3	1752024	1752519	496	1752241	747	11.7038	1.30168	10.0482	NA_peak_110
NC_000962.3	1851959	1852233	275	1852071	830	13.7724	1.31518	12.0768	NA_peak_111
NC_000962.3	1855499	1855958	460	1855764	917	16.6143	1.33543	14.8633	NA_peak_112
NC_000962.3	1863715	1863974	260	1863787	652	4.33093	1.16842	2.90805	NA_peak_113
NC_000962.3	1890580	1891378	799	1891162	698	26.1542	1.53883	24.2326	NA_peak_114
NC_000962.3	1934760	1935125	366	1934846	584	8.75732	1.28786	7.17389	NA_peak_115
NC_000962.3	1982251	1982902	652	1982694	1092	59.8792	1.71394	57.3342	NA_peak_116
NC_000962.3	1983405	1984015	611	1983778	1058	58.6745	1.71933	56.1518	NA_peak_117
NC_000962.3	2017591	2017855	265	2017648	639	3.446	1.14516	2.07357	NA_peak_118
NC_000962.3	2018742	2019057	316	2018835	555	5.56096	1.21847	4.08109	NA_peak_119
NC_000962.3	2027865	2028202	338	2028142	679	6.5816	1.21837	5.06392	NA_peak_120
NC_000962.3	2063974	2064182	209	2064068	679	7.03741	1.22828	5.50427	NA_peak_121
NC_000962.3	2072242	2072725	484	2072586	976	11.1879	1.25077	9.54321	NA_peak_122
NC_000962.3	2074061	2074291	231	2074208	1031	5.49012	1.15372	4.01314	NA_peak_123
NC_000962.3	2121370	2123272	1903	2122164	2027	61.5196	1.48053	58.9482	NA_peak_124
NC_000962.3	2125846	2126098	253	2125875	1075	3.67883	1.11494	2.29219	NA_peak_125
NC_000962.3	2134989	2135302	314	2135097	1158	3.82463	1.11345	2.42941	NA_peak_126
NC_000962.3	2135739	2136228	490	2135919	1088	9.2712	1.20912	7.67353	NA_peak_127
NC_000962.3	2139821	2140169	349	2140099	700	4.86511	1.17536	3.41574	NA_peak_128
NC_000962.3	2145732	2146061	330	2145918	732	15.7792	1.37164	14.0433	NA_peak_129
NC_000962.3	2150692	2151086	395	2150960	947	6.36566	1.17742	4.85563	NA_peak_130
NC_000962.3	2163185	2163807	623	2163631	955	31.6639	1.50088	29.6423	NA_peak_131
NC_000962.3	2164073	2164946	874	2164716	1014	7.10148	1.18339	5.56633	NA_peak_132
NC_000962.3	2165530	2166109	580	2165728	1271	59.6637	1.64105	57.1226	NA_peak_133
NC_000962.3	2167347	2167623	277	2167529	706	8.29369	1.2488	6.72328	NA_peak_134
NC_000962.3	2168345	2169984	1640	2168677	1349	78.0422	1.74506	75.1993	NA_peak_135
NC_000962.3	2170574	2171192	619	2170814	967	69.5238	1.87025	66.8161	NA_peak_136
NC_000962.3	2178888	2179174	287	2179020	929	16.261	1.32823	14.5162	NA_peak_137
NC_000962.3	2198654	2199338	685	2199137	632	15.0228	1.39353	13.3019	NA_peak_138
NC_000962.3	2223951	2224240	290	2224157	845	9.65941	1.24787	8.05187	NA_peak_139
NC_000962.3	2268102	2268831	730	2268421	938	27.346	1.45905	25.402	NA_peak_140
NC_000962.3	2325113	2325878	766	2325703	894	23.3006	1.42527	21.4317	NA_peak_141
NC_000962.3	2337444	2337896	453	2337774	744	10.1099	1.27481	8.49087	NA_peak_142
NC_000962.3	2338112	2338650	539	2338440	761	7.37741	1.22077	5.83341	NA_peak_143
NC_000962.3	2339413	2339676	264	2339517	810	7.30755	1.21181	5.76578	NA_peak_144
NC_000962.3	2339818	2340755	938	2340109	770	8.45007	1.23966	6.87509	NA_peak_145
NC_000962.3	2357550	2357769	220	2357670	602	4.89175	1.19131	3.44097	NA_peak_146
NC_000962.3	2366817	2367859	1043	2366953	816	35.7486	1.60411	33.6538	NA_peak_147
NC_000962.3	2374225	2374595	371	2374438	1051	17.0327	1.31419	15.274	NA_peak_148
NC_000962.3	2396670	2397320	651	2397181	1042	19.5952	1.34561	17.7922	NA_peak_149
NC_000962.3	2405362	2405664	303	2405494	1173	10.1826	1.21271	8.56163	NA_peak_150
NC_000962.3	2407306	2407547	242	2407398	967	10.4829	1.24182	8.85488	NA_peak_151
NC_000962.3	2420298	2421310	1013	2420538	1557	20.6474	1.2814	18.8265	NA_peak_152
NC_000962.3	2422122	2422353	232	2422203	1402	5.90446	1.13637	4.41094	NA_peak_153
NC_000962.3	2422635	2424125	1491	2423049	1679	28.0519	1.32606	26.0955	NA_peak_154
NC_000962.3	2453086	2453446	361	2453314	941	18.7551	1.3573	16.9661	NA_peak_155
NC_000962.3	2458284	2458572	289	2458391	1111	6.46974	1.1642	4.95612	NA_peak_156
NC_000962.3	2463870	2464357	488	2463993	1270	12.3774	1.22992	10.7084	NA_peak_157
NC_000962.3	2468204	2468406	203	2468320	957	7.03855	1.18829	5.50537	NA_peak_158
NC_000962.3	2473233	2473470	238	2473324	738	7.71417	1.23132	6.16018	NA_peak_159
NC_000962.3	2488969	2489272	304	2489020	1098	3.92312	1.11875	2.52217	NA_peak_160
NC_000962.3	2510062	2510476	415	2510304	594	7.84203	1.26481	6.28442	NA_peak_161
NC_000962.3	2511371	2511661	291	2511470	635	10.1601	1.30249	8.53989	NA_peak_162
NC_000962.3	2517411	2517823	413	2517630	1086	6.8027	1.17173	5.27748	NA_peak_163
NC_000962.3	2518117	2518357	241	2518206	1202	6.74884	1.16158	5.2253	NA_peak_164
NC_000962.3	2564989	2565269	281	2565151	688	19.7213	1.44831	17.9162	NA_peak_165
NC_000962.3	2566669	2567024	356	2566811	736	6.42391	1.20537	4.91204	NA_peak_166
NC_000962.3	2579174	2580087	914	2579716	1045	55.86	1.7003	53.3861	NA_peak_167
NC_000962.3	2610541	2612107	1567	2611858	1473	45.1678	1.4808	42.9058	NA_peak_168
NC_000962.3	2612999	2615778	2780	2613753	1833	109.202	1.76446	106.001	NA_peak_169
NC_000962.3	2616230	2617164	935	2616725	1571	52.7179	1.5113	50.3036	NA_peak_170
NC_000962.3	2626660	2627070	411	2626908	1000	8.98252	1.21492	7.39292	NA_peak_171
NC_000962.3	2632309	2632546	238	2632439	842	12.5731	1.29457	10.9002	NA_peak_172
NC_000962.3	2633061	2633407	347	2633209	1528	11.3521	1.19623	9.70396	NA_peak_173
NC_000962.3	2633652	2635471	1820	2634050	1578	31.3909	1.36351	29.3737	NA_peak_174
NC_000962.3	2637630	2638866	1237	2638491	1270	61.7886	1.65742	59.2126	NA_peak_175
NC_000962.3	2655170	2655625	456	2655481	1036	15.2293	1.29497	13.5042	NA_peak_176
NC_000962.3	2684498	2684901	404	2684735	995	23.0922	1.39555	21.2276	NA_peak_177
NC_000962.3	2685330	2685759	430	2685460	756	6.43963	1.20263	4.92701	NA_peak_178
NC_000962.3	2691999	2692917	919	2692599	1956	130.837	1.83301	127.502	NA_peak_179
NC_000962.3	2739563	2739819	257	2739652	561	4.48648	1.18746	3.05532	NA_peak_180
NC_000962.3	2744848	2745280	433	2745063	866	10.4667	1.2574	8.83893	NA_peak_181
NC_000962.3	2802360	2802589	230	2802421	581	8.29178	1.2784	6.72143	NA_peak_182
NC_000962.3	2804316	2804941	626	2804589	673	10.7879	1.30411	9.15252	NA_peak_183
NC_000962.3	2805266	2805605	340	2805498	605	8.60925	1.27881	7.02986	NA_peak_184
NC_000962.3	2806747	2808114	1368	2807685	1220	34.4192	1.45281	32.3483	NA_peak_185
NC_000962.3	2849158	2849751	594	2849465	1286	23.9364	1.34614	22.0563	NA_peak_186
NC_000962.3	2866675	2867116	442	2866767	679	18.3755	1.43098	16.5933	NA_peak_187
NC_000962.3	2867368	2867788	421	2867667	674	9.8149	1.2855	8.20328	NA_peak_188
NC_000962.3	2936072	2936309	238	2936214	612	6.01104	1.21793	4.51345	NA_peak_189
NC_000962.3	2959012	2959958	947	2959597	1027	30.1165	1.46223	28.1223	NA_peak_190
NC_000962.3	2960968	2961270	303	2961087	561	5.09779	1.20466	3.63759	NA_peak_191
NC_000962.3	2961346	2961701	356	2961542	597	9.78908	1.30605	8.17829	NA_peak_192
NC_000962.3	2969702	2970019	318	2969851	841	6.01239	1.18251	4.51476	NA_peak_193
NC_000962.3	2979079	2979476	398	2979229	626	14.1524	1.38032	12.4492	NA_peak_194
NC_000962.3	2980840	2981046	207	2980928	654	7.20197	1.2368	5.66375	NA_peak_195
NC_000962.3	3042476	3042677	202	3042597	825	6.6126	1.19637	5.09387	NA_peak_196
NC_000962.3	3046834	3048689	1856	3047484	1173	38.3001	1.49865	36.1605	NA_peak_197
NC_000962.3	3078007	3078271	265	3078163	719	11.8152	1.31049	10.1574	NA_peak_198
NC_000962.3	3147803	3148331	529	3147960	719	4.82428	1.17181	3.37679	NA_peak_199
NC_000962.3	3214309	3214796	488	3214533	797	15.3407	1.34647	13.6133	NA_peak_200
NC_000962.3	3242222	3243052	831	3242873	1394	61.3306	1.61372	58.7624	NA_peak_201
NC_000962.3	3243310	3244528	1219	3244028	1235	43.1148	1.52234	40.8895	NA_peak_202
NC_000962.3	3273779	3274350	572	3274224	643	8.38372	1.26444	6.81071	NA_peak_203
NC_000962.3	3283606	3284254	649	3283940	977	32.1165	1.49833	30.0874	NA_peak_204
NC_000962.3	3284534	3285163	630	3284943	973	29.1007	1.46755	27.1251	NA_peak_205
NC_000962.3	3298864	3299441	578	3299198	965	24.6719	1.42109	22.779	NA_peak_206
NC_000962.3	3299877	3300917	1041	3300384	1270	47.0296	1.54403	44.7339	NA_peak_207
NC_000962.3	3301409	3302268	860	3301988	1152	29.0819	1.42011	27.1067	NA_peak_208
NC_000962.3	3308569	3309547	979	3309325	907	22.944	1.41717	21.0821	NA_peak_209
NC_000962.3	3309998	3310253	256	3310159	783	15.6707	1.35512	13.9369	NA_peak_210
NC_000962.3	3311785	3313124	1340	3312177	1159	65.8386	1.73329	63.1949	NA_peak_211
NC_000962.3	3348338	3348677	340	3348585	598	4.56215	1.18306	3.1272	NA_peak_212
NC_000962.3	3364874	3365110	237	3365058	762	6.18657	1.19647	4.68285	NA_peak_213
NC_000962.3	3377339	3377658	320	3377498	1031	64.3959	1.78425	61.7787	NA_peak_214
NC_000962.3	3378933	3379354	422	3379081	720	13.7278	1.3424	12.033	NA_peak_215
NC_000962.3	3379797	3380100	304	3379943	929	28.5753	1.47571	26.6094	NA_peak_216
NC_000962.3	3477413	3478656	1244	3477802	1107	63.9404	1.74156	61.3301	NA_peak_217
NC_000962.3	3478812	3480008	1197	3479496	1012	37.3336	1.53955	35.2109	NA_peak_218
NC_000962.3	3483078	3483447	370	3483254	618	10.4366	1.3129	8.80946	NA_peak_219
NC_000962.3	3485232	3485644	413	3485331	894	9.98238	1.24513	8.36659	NA_peak_220
NC_000962.3	3487275	3488125	851	3487511	1220	47.9514	1.56615	45.6379	NA_peak_221
NC_000962.3	3489814	3490299	486	3489947	1061	24.6901	1.39719	22.7969	NA_peak_222
NC_000962.3	3509616	3510132	517	3509711	638	11.8748	1.33449	10.2158	NA_peak_223
NC_000962.3	3511260	3511504	245	3511325	616	4.43892	1.17673	3.01039	NA_peak_224
NC_000962.3	3527535	3528546	1012	3528395	887	13.9054	1.3049	12.2071	NA_peak_225
NC_000962.3	3559212	3559566	355	3559339	719	4.41933	1.16187	2.99183	NA_peak_226
NC_000962.3	3583612	3583815	204	3583713	750	6.51827	1.20518	5.00298	NA_peak_227
NC_000962.3	3587526	3587870	345	3587696	896	4.09364	1.13633	2.68346	NA_peak_228
NC_000962.3	3595461	3595932	472	3595712	1148	28.6063	1.4165	26.6398	NA_peak_229
NC_000962.3	3597750	3598210	461	3597876	735	11.4217	1.29975	9.77219	NA_peak_230
NC_000962.3	3700520	3701117	598	3700778	820	31.6318	1.5529	29.6106	NA_peak_231
NC_000962.3	3730917	3731500	584	3731217	1871	68.7804	1.54538	66.0849	NA_peak_232
NC_000962.3	3732739	3733722	984	3733364	1268	64.2306	1.67648	61.6158	NA_peak_233
NC_000962.3	3733933	3735714	1782	3734312	1399	103.416	1.89426	100.261	NA_peak_234
NC_000962.3	3735800	3736053	254	3736024	860	14.2102	1.31493	12.5058	NA_peak_235
NC_000962.3	3749623	3750049	427	3749771	892	9.25952	1.23384	7.66217	NA_peak_236
NC_000962.3	3751042	3751800	759	3751484	1036	41.3141	1.56958	39.1212	NA_peak_237
NC_000962.3	3752014	3752665	652	3752479	880	26.4849	1.46792	24.5571	NA_peak_238
NC_000962.3	3756653	3756909	257	3756831	683	5.33076	1.18907	3.8602	NA_peak_239
NC_000962.3	3761620	3762159	540	3762027	963	11.7863	1.26128	10.1289	NA_peak_240
NC_000962.3	3763433	3763877	445	3763605	1009	19.7965	1.35474	17.99	NA_peak_241
NC_000962.3	3765041	3765723	683	3765391	1368	87.7166	1.80358	84.7364	NA_peak_242
NC_000962.3	3765946	3766460	515	3766157	943	21.678	1.39227	19.8393	NA_peak_243
NC_000962.3	3790949	3792173	1225	3791679	1250	42.4498	1.51284	40.2358	NA_peak_244
NC_000962.3	3792329	3793404	1076	3792494	1162	39.4885	1.51214	37.3282	NA_peak_245
NC_000962.3	3798356	3799194	839	3798551	694	25.4008	1.53002	23.4944	NA_peak_246
NC_000962.3	3831685	3831917	233	3831722	825	6.6126	1.19637	5.09387	NA_peak_247
NC_000962.3	3834530	3834835	306	3834647	957	9.74333	1.23213	8.13361	NA_peak_248
NC_000962.3	3842268	3843574	1307	3843154	923	32.4367	1.52054	30.4018	NA_peak_249
NC_000962.3	3847339	3847710	372	3847521	599	10.5419	1.32088	8.91228	NA_peak_250
NC_000962.3	3879821	3881042	1222	3880723	1071	35.4865	1.50236	33.3963	NA_peak_251
NC_000962.3	3893747	3894441	695	3894276	1584	59.1359	1.54953	56.6041	NA_peak_252
NC_000962.3	3894617	3894914	298	3894792	1293	10.6761	1.20743	9.04327	NA_peak_253
NC_000962.3	3895352	3896065	714	3895734	1758	67.1904	1.55938	64.5235	NA_peak_254
NC_000962.3	3906970	3907731	762	3907518	1605	91.2472	1.73766	88.2177	NA_peak_255
NC_000962.3	3922267	3922466	200	3922321	678	5.31157	1.18938	3.84203	NA_peak_256
NC_000962.3	3932919	3933157	239	3933052	710	6.68088	1.21507	5.15976	NA_peak_257
NC_000962.3	3964494	3964740	247	3964623	589	9.33431	1.29887	7.73503	NA_peak_258
NC_000962.3	3964856	3965220	365	3965135	611	12.0841	1.3473	10.4209	NA_peak_259
NC_000962.3	4024114	4024388	275	4024318	987	12.8476	1.27218	11.1698	NA_peak_260
NC_000962.3	4024765	4025165	401	4024989	1237	22.9059	1.34452	21.0447	NA_peak_261
NC_000962.3	4025351	4025622	272	4025513	1008	6.22965	1.16902	4.72447	NA_peak_262
NC_000962.3	4037071	4037277	207	4037180	780	5.25925	1.1741	3.79177	NA_peak_263
NC_000962.3	4040451	4040933	483	4040786	1093	9.86004	1.2169	8.24734	NA_peak_264
NC_000962.3	4041209	4041590	382	4041420	1183	25.4387	1.37873	23.5315	NA_peak_265
NC_000962.3	4041917	4042257	341	4042087	1106	11.7423	1.24069	10.0858	NA_peak_266
NC_000962.3	4053806	4057589	3784	4054676	2852	319.344	2.25166	313.545	NA_peak_267
NC_000962.3	4062160	4062572	413	4062340	1106	43.1448	1.56192	40.919	NA_peak_268
NC_000962.3	4082709	4082986	278	4082791	709	7.19025	1.22594	5.65233	NA_peak_269
NC_000962.3	4099088	4099620	533	4099360	1288	39.8441	1.48208	37.6773	NA_peak_270
NC_000962.3	4100485	4101311	827	4100888	2159	278.657	2.4095	274.165	NA_peak_271
NC_000962.3	4119081	4119726	646	4119418	1474	91.7859	1.78729	88.751	NA_peak_272
NC_000962.3	4128662	4129280	619	4129120	958	21.8785	1.39082	20.0361	NA_peak_273
NC_000962.3	4168164	4168599	436	4168241	913	6.3144	1.18009	4.80618	NA_peak_274
NC_000962.3	4198352	4198741	390	4198514	1111	11.2801	1.23404	9.6334	NA_peak_275
NC_000962.3	4216796	4217150	355	4216990	677	13.0938	1.34439	11.4115	NA_peak_276
NC_000962.3	4224720	4225062	343	4224978	946	11.4806	1.25958	9.8297	NA_peak_277
NC_000962.3	4231075	4231284	210	4231256	802	6.13907	1.18998	4.63713	NA_peak_278
NC_000962.3	4263007	4263446	440	4263187	1384	42.0506	1.47718	39.8437	NA_peak_279
NC_000962.3	4265377	4265635	259	4265537	1083	11.7733	1.24401	10.1162	NA_peak_280
NC_000962.3	4284519	4284806	288	4284685	730	10.8178	1.29044	9.18152	NA_peak_281
NC_000962.3	4285172	4285466	295	4285411	762	4.21041	1.15172	2.79407	NA_peak_282
NC_000962.3	4285542	4285749	208	4285563	798	5.7268	1.18195	4.24028	NA_peak_283
NC_000962.3	4286761	4288342	1582	4287924	1091	20.0582	1.34126	18.2474	NA_peak_284
NC_000962.3	4288568	4289212	645	4288754	1369	44.4778	1.49887	42.2289	NA_peak_285
NC_000962.3	4290455	4290917	463	4290720	1428	24.4803	1.32967	22.5908	NA_peak_286
NC_000962.3	4291444	4292462	1019	4291781	1442	33.0829	1.39737	31.0368	NA_peak_287
NC_000962.3	4299340	4301175	1836	4300419	1239	59.2255	1.64896	56.6921	NA_peak_288
NC_000962.3	4313915	4314339	425	4314163	1427	43.0862	1.47554	40.8615	NA_peak_289
NC_000962.3	4314774	4315019	246	4314862	1137	7.40463	1.1768	5.85991	NA_peak_290
NC_000962.3	4320405	4320650	246	4320547	677	9.16228	1.27215	7.56773	NA_peak_291
NC_000962.3	4321323	4321678	356	4321502	834	30.1498	1.529	28.1549	NA_peak_292
NC_000962.3	4323701	4324106	406	4323846	966	13.3398	1.28234	11.6527	NA_peak_293
NC_000962.3	4339922	4341097	1176	4340317	1030	27.4428	1.43373	25.497	NA_peak_294
NC_000962.3	4341522	4341771	250	4341535	779	4.31984	1.15256	2.8975	NA_peak_295
NC_000962.3	4350468	4350887	420	4350650	1088	16.4956	1.30157	14.7466	NA_peak_296
NC_000962.3	4352389	4353153	765	4352584	1140	13.7151	1.26097	12.0206	NA_peak_297
NC_000962.3	4358970	4360266	1297	4359458	1236	19.2215	1.30823	17.4248	NA_peak_298
NC_000962.3	4361885	4362178	294	4362061	933	8.34657	1.21321	6.77444	NA_peak_299
NC_000962.3	4371387	4371949	563	4371691	1275	39.191	1.47991	37.0359	NA_peak_300
NC_000962.3	4372355	4372894	540	4372584	1358	57.0718	1.59423	54.5768	NA_peak_301
NC_000962.3	4373655	4374282	628	4373888	809	7.55383	1.21659	6.00439	NA_peak_302
NC_000962.3	4385772	4386448	677	4386002	1092	28.8669	1.43231	26.8957	NA_peak_303
NC_000962.3	4387111	4388493	1383	4387552	1336	64.2754	1.65286	61.6598	NA_peak_304
NC_000962.3	4393103	4393471	369	4393249	920	8.29727	1.21408	6.72675	NA_peak_305
NC_000962.3	4410773	4411517	745	4411306	1527	31.9021	1.37473	29.8767	NA_peak_306

## Sheet: propionate Replicate 1
# This file is generated by MACS version 2.2.6
# Command line: callpeak -t P1-ChIP_S9_R1_001.sorted.bam -c P1-Inp_S3_R1_001.sorted.bam -g 4411532 --mfold 2 80 -s 50 --nomodel --keep-dup all --outdir ../macs_out/single_sample/P1/
# ARGUMENTS LIST:
# name = NA
# format = AUTO
# ChIP-seq file = ['P1-ChIP_S9_R1_001.sorted.bam']
# control file = ['P1-Inp_S3_R1_001.sorted.bam']
# effective genome size = 4.41e+06
# band width = 300
# model fold = [2, 80]
# qvalue cutoff = 5.00e-02
# The maximum gap between significant sites is assigned as the read length/tag size.
# The minimum length of peaks is assigned as the predicted fragment length "d".
# Larger dataset will be scaled towards smaller dataset.
# Range for calculating regional lambda is: 1000 bps and 10000 bps
# Broad region calling is off
# Paired-End mode is off
# tag size is determined as 50 bps
# total tags in treatment: 11108890
# total tags in control: 10966600
# d = 200
chr	start	end	length	abs_summit	pileup	#NAME?	fold_enrichment	#NAME?	name
NC_000962.3	24436	25008	573	24622	993.11	7.49702	1.19227	5.8148	NA_peak_1
NC_000962.3	25591	25905	315	25751	1021.74	7.7395	1.19396	6.04535	NA_peak_2
NC_000962.3	33807	34394	588	34206	809.5	17.7399	1.37858	15.6173	NA_peak_3
NC_000962.3	35006	35528	523	35433	788.77	7.33846	1.2169	5.66412	NA_peak_4
NC_000962.3	50493	50862	370	50710	918.09	19.6311	1.37382	17.4317	NA_peak_5
NC_000962.3	51033	51257	225	51125	866.75	11.1607	1.26939	9.30419	NA_peak_6
NC_000962.3	57901	58286	386	58094	2452.18	33.1765	1.28911	30.4383	NA_peak_7
NC_000962.3	105872	106133	262	105965	632.79	8.55204	1.27221	6.81772	NA_peak_8
NC_000962.3	135836	138093	2258	137663	840.1	20.2696	1.40324	18.0468	NA_peak_9
NC_000962.3	186783	187248	466	186982	6083.07	34.9659	1.17749	32.1515	NA_peak_10
NC_000962.3	226498	227059	562	226724	1017.79	16.1934	1.31119	14.1313	NA_peak_11
NC_000962.3	251503	252588	1086	251872	1144.15	18.0795	1.31055	15.9425	NA_peak_12
NC_000962.3	252736	252981	246	252829	1074.06	7.83239	1.18923	6.13356	NA_peak_13
NC_000962.3	293609	293821	213	293743	875.64	8.6272	1.22675	6.88936	NA_peak_14
NC_000962.3	296306	297074	769	296922	793.7	14.3503	1.33384	12.3604	NA_peak_15
NC_000962.3	300878	301708	831	301060	709.79	10.5387	1.29188	8.70931	NA_peak_16
NC_000962.3	331827	332086	260	331911	639.7	6.10323	1.21621	4.49447	NA_peak_17
NC_000962.3	339111	339435	325	339291	935.86	4.87532	1.15093	3.34137	NA_peak_18
NC_000962.3	339886	340279	394	340101	973.37	9.52947	1.22717	7.7476	NA_peak_19
NC_000962.3	370009	371082	1074	370960	967.45	10.2153	1.23842	8.40087	NA_peak_20
NC_000962.3	371435	372194	760	371634	993.11	23.1991	1.39741	20.8568	NA_peak_21
NC_000962.3	372738	373224	487	372932	895.38	10.2802	1.25018	8.46268	NA_peak_22
NC_000962.3	373441	373687	247	373559	858.86	7.51512	1.21004	5.83159	NA_peak_23
NC_000962.3	409490	410517	1028	409748	894.4	22.0047	1.41007	19.7141	NA_peak_24
NC_000962.3	431968	433145	1178	432949	894.4	6.48625	1.18595	4.85633	NA_peak_25
NC_000962.3	483682	487124	3443	485745	1047.41	52.2453	1.66732	48.8822	NA_peak_26
NC_000962.3	489020	489933	914	489780	815.42	12.3816	1.29797	10.4735	NA_peak_27
NC_000962.3	532490	532717	228	532545	947.7	8.96282	1.22224	7.20877	NA_peak_28
NC_000962.3	538797	540534	1738	540019	1027.67	21.7	1.37339	19.4215	NA_peak_29
NC_000962.3	540705	542135	1431	541713	1147.12	33.6913	1.46443	30.9323	NA_peak_30
NC_000962.3	544954	545540	587	545146	885.51	9.95588	1.24685	8.15338	NA_peak_31
NC_000962.3	557155	558617	1463	557638	1613.07	65.9366	1.58491	62.1897	NA_peak_32
NC_000962.3	558679	559305	627	558838	1589.38	31.1732	1.36069	28.5203	NA_peak_33
NC_000962.3	559430	560900	1471	559697	1490.66	20.0085	1.2837	17.7955	NA_peak_34
NC_000962.3	592607	592846	240	592696	927.96	8.69147	1.2209	6.95064	NA_peak_35
NC_000962.3	595335	595607	273	595335	853.92	2.76575	1.10741	1.41568	NA_peak_36
NC_000962.3	598423	599919	1497	599680	1081.96	30.0615	1.4482	27.4586	NA_peak_37
NC_000962.3	620587	620797	211	620727	891.43	4.01125	1.13541	2.54026	NA_peak_38
NC_000962.3	622121	622370	250	622238	1042.47	7.11948	1.18147	5.4565	NA_peak_39
NC_000962.3	623465	623872	408	623578	1070.12	12.0097	1.24897	10.1169	NA_peak_40
NC_000962.3	672115	672331	217	672294	701.89	7.18411	1.22883	5.51778	NA_peak_41
NC_000962.3	710104	710319	216	710225	628.84	8.127	1.26429	6.41374	NA_peak_42
NC_000962.3	731892	732172	281	732075	764.09	4.97806	1.16986	3.43755	NA_peak_43
NC_000962.3	733283	733694	412	733651	940.79	4.1959	1.13606	2.71012	NA_peak_44
NC_000962.3	747228	747456	229	747308	976.33	8.1486	1.2051	6.43433	NA_peak_45
NC_000962.3	748079	748310	232	748217	913.15	5.87564	1.17199	4.27999	NA_peak_46
NC_000962.3	759390	759810	421	759688	768.03	16.932	1.3782	14.8408	NA_peak_47
NC_000962.3	781225	781672	448	781561	921.05	10.7717	1.25313	8.932	NA_peak_48
NC_000962.3	836064	836310	247	836185	974.36	7.98216	1.20266	6.27621	NA_peak_49
NC_000962.3	848006	849608	1603	849123	1115.53	36.4084	1.49869	33.5349	NA_peak_50
NC_000962.3	850090	850307	218	850217	834.18	4.61046	1.15388	3.09493	NA_peak_51
NC_000962.3	851623	851947	325	851811	837.14	9.90843	1.25357	8.1081	NA_peak_52
NC_000962.3	898717	899058	342	898924	677.21	12.5675	1.33559	10.6517	NA_peak_53
NC_000962.3	904614	905243	630	905063	1082.95	8.80992	1.20412	7.06336	NA_peak_54
NC_000962.3	965567	965856	290	965742	1058.27	8.12372	1.19556	6.41087	NA_peak_55
NC_000962.3	969271	969533	263	969442	933.88	9.30122	1.22975	7.53053	NA_peak_56
NC_000962.3	969670	969886	217	969764	865.77	4.25652	1.1437	2.76611	NA_peak_57
NC_000962.3	975997	976459	463	976107	749.28	4.92763	1.17085	3.39044	NA_peak_58
NC_000962.3	999947	1000181	235	1000110	627.85	5.0699	1.19327	3.52337	NA_peak_59
NC_000962.3	1039668	1040557	890	1039972	926.97	26.2432	1.45177	23.7871	NA_peak_60
NC_000962.3	1065879	1066099	221	1065970	718.68	8.61396	1.25379	6.87671	NA_peak_61
NC_000962.3	1101742	1106460	4719	1104277	1086.9	47.4168	1.6086	44.1651	NA_peak_62
NC_000962.3	1123509	1123845	337	1123677	893.41	9.32831	1.23537	7.55602	NA_peak_63
NC_000962.3	1124109	1124349	241	1124327	896.37	3.92965	1.13304	2.4651	NA_peak_64
NC_000962.3	1127770	1128066	297	1127930	1079.99	12.3468	1.25317	10.4402	NA_peak_65
NC_000962.3	1178865	1179280	416	1178935	674.25	10.9925	1.30812	9.14313	NA_peak_66
NC_000962.3	1190318	1190804	487	1190521	1008.91	21.0216	1.3703	18.77	NA_peak_67
NC_000962.3	1192034	1192569	536	1192337	994.1	17.0118	1.32468	14.9177	NA_peak_68
NC_000962.3	1196349	1197535	1187	1197162	1281.37	25.2992	1.35989	22.876	NA_peak_69
NC_000962.3	1197656	1197987	332	1197810	1041.49	3.95433	1.12337	2.48772	NA_peak_70
NC_000962.3	1214139	1214639	501	1214318	1120.46	20.5241	1.34146	18.2917	NA_peak_71
NC_000962.3	1214972	1215204	233	1215135	1021.74	10.9188	1.24149	9.07256	NA_peak_72
NC_000962.3	1240040	1240495	456	1240163	1007.92	17.5085	1.32928	15.3952	NA_peak_73
NC_000962.3	1240724	1241085	362	1241008	930.92	11.3444	1.2614	9.47994	NA_peak_74
NC_000962.3	1254431	1257605	3175	1255969	1429.45	72.7566	1.68091	68.8255	NA_peak_75
NC_000962.3	1286945	1287278	334	1287120	707.82	9.17498	1.2671	7.41073	NA_peak_76
NC_000962.3	1305792	1306187	396	1306121	716.7	6.26096	1.20622	4.64321	NA_peak_77
NC_000962.3	1309109	1309364	256	1309303	750.27	3.50594	1.13518	2.07885	NA_peak_78
NC_000962.3	1313182	1313910	729	1313545	887.48	15.9268	1.33366	13.8759	NA_peak_79
NC_000962.3	1325286	1325762	477	1325570	1072.09	36.7238	1.51395	33.8361	NA_peak_80
NC_000962.3	1338252	1338530	279	1338359	686.1	12.2097	1.32644	10.3088	NA_peak_81
NC_000962.3	1342790	1342993	204	1342886	722.62	8.34124	1.24763	6.61731	NA_peak_82
NC_000962.3	1364393	1364654	262	1364540	831.22	8.17586	1.22493	6.46033	NA_peak_83
NC_000962.3	1376411	1376649	239	1376509	606.14	5.98213	1.21871	4.38008	NA_peak_84
NC_000962.3	1412964	1413346	383	1413273	653.52	10.9571	1.31383	9.10915	NA_peak_85
NC_000962.3	1459700	1460100	401	1459870	791.73	6.11652	1.19207	4.50707	NA_peak_86
NC_000962.3	1460692	1461536	845	1460978	772.97	10.8668	1.28353	9.023	NA_peak_87
NC_000962.3	1471503	1477394	5892	1474404	1271.5	80.3917	1.79529	75.9926	NA_peak_88
NC_000962.3	1504410	1504974	565	1504917	819.37	6.51884	1.19587	4.88715	NA_peak_89
NC_000962.3	1524459	1525359	901	1525218	617.98	7.01353	1.24249	5.35583	NA_peak_90
NC_000962.3	1561053	1562423	1371	1562340	825.29	4.78608	1.15889	3.25844	NA_peak_91
NC_000962.3	1564211	1564472	262	1564351	902.29	8.64228	1.22265	6.90376	NA_peak_92
NC_000962.3	1565268	1565470	203	1565365	966.46	7.42075	1.1944	5.74228	NA_peak_93
NC_000962.3	1573858	1574155	298	1574005	708.8	9.4496	1.27205	7.67156	NA_peak_94
NC_000962.3	1574373	1574812	440	1574582	635.75	8.87781	1.27816	7.12788	NA_peak_95
NC_000962.3	1646937	1647881	945	1647069	822.33	5.56948	1.17619	3.99188	NA_peak_96
NC_000962.3	1679125	1680425	1301	1679482	1029.64	32.8454	1.49023	30.1207	NA_peak_97
NC_000962.3	1690793	1694662	3870	1692794	1004.96	37.9538	1.55002	35.0095	NA_peak_98
NC_000962.3	1695044	1697851	2808	1696858	949.68	36.3152	1.5534	33.4455	NA_peak_99
NC_000962.3	1699956	1701095	1140	1700764	816.41	22.2635	1.43758	19.9613	NA_peak_100
NC_000962.3	1712234	1712974	741	1712682	731.51	13.186	1.33135	11.2448	NA_peak_101
NC_000962.3	1714739	1715570	832	1715092	779.88	18.3499	1.39693	16.2018	NA_peak_102
NC_000962.3	1735373	1736484	1112	1735593	918.09	53.2767	1.74136	49.89	NA_peak_103
NC_000962.3	1752055	1752498	444	1752164	676.23	7.77674	1.2449	6.08069	NA_peak_104
NC_000962.3	1773444	1773821	378	1773744	737.43	4.5216	1.16288	3.01216	NA_peak_105
NC_000962.3	1791279	1791511	233	1791367	779.88	6.40339	1.19988	4.77785	NA_peak_106
NC_000962.3	1827982	1828307	326	1828128	614.03	6.42819	1.22761	4.8014	NA_peak_107
NC_000962.3	1851852	1852532	681	1852077	901.31	8.14224	1.21441	6.42831	NA_peak_108
NC_000962.3	1855452	1855891	440	1855579	927.96	11.2443	1.26046	9.38418	NA_peak_109
NC_000962.3	1863634	1864226	593	1864098	779.88	5.92807	1.19	4.32932	NA_peak_110
NC_000962.3	1982281	1982867	587	1982680	833.19	42.5492	1.67448	39.4204	NA_peak_111
NC_000962.3	1983364	1983910	547	1983563	832.2	36.4972	1.6054	33.6195	NA_peak_112
NC_000962.3	1993050	1993278	229	1993150	774.95	6.42534	1.20115	4.79869	NA_peak_113
NC_000962.3	2017468	2017899	432	2017733	752.24	9.63689	1.2651	7.84975	NA_peak_114
NC_000962.3	2018934	2019391	458	2019212	690.05	5.56211	1.19352	3.98493	NA_peak_115
NC_000962.3	2056006	2056230	225	2056160	632.79	6.24859	1.22117	4.63159	NA_peak_116
NC_000962.3	2075651	2075854	204	2075681	1051.36	5.15623	1.14636	3.60424	NA_peak_117
NC_000962.3	2121418	2123258	1841	2121910	1217.21	22.8464	1.34757	20.5191	NA_peak_118
NC_000962.3	2135688	2135913	226	2135834	896.37	5.22884	1.16119	3.67242	NA_peak_119
NC_000962.3	2145755	2146012	258	2145933	743.36	9.21605	1.25948	7.44965	NA_peak_120
NC_000962.3	2163468	2163732	265	2163637	749.28	15.594	1.36414	13.5562	NA_peak_121
NC_000962.3	2164404	2164807	404	2164486	840.1	6.71122	1.19644	5.06947	NA_peak_122
NC_000962.3	2165543	2166184	642	2165708	910.19	46.9789	1.68116	43.7375	NA_peak_123
NC_000962.3	2168194	2169909	1716	2168652	925	44.6836	1.6518	41.4987	NA_peak_124
NC_000962.3	2170614	2171209	596	2170755	696.96	16.7661	1.40102	14.6817	NA_peak_125
NC_000962.3	2178872	2179117	246	2178958	936.84	13.4819	1.29073	11.5285	NA_peak_126
NC_000962.3	2201105	2201435	331	2201339	664.38	4.72531	1.17766	3.20172	NA_peak_127
NC_000962.3	2223232	2223467	236	2223365	778.89	10.046	1.26812	8.23935	NA_peak_128
NC_000962.3	2267363	2267569	207	2267528	719.66	5.94321	1.19871	4.34358	NA_peak_129
NC_000962.3	2268029	2268846	818	2268248	798.64	14.8127	1.33943	12.8048	NA_peak_130
NC_000962.3	2325479	2325846	368	2325627	768.03	12.8759	1.31594	10.9474	NA_peak_131
NC_000962.3	2337603	2337829	227	2337750	645.62	7.79087	1.25266	6.09424	NA_peak_132
NC_000962.3	2338116	2338332	217	2338261	696.96	7.6147	1.23883	5.92653	NA_peak_133
NC_000962.3	2339472	2339698	227	2339587	784.82	12.0747	1.30059	10.1792	NA_peak_134
NC_000962.3	2339951	2340336	386	2340111	772.97	8.74743	1.24633	7.00386	NA_peak_135
NC_000962.3	2340523	2340802	280	2340748	680.17	8.52033	1.2591	6.78768	NA_peak_136
NC_000962.3	2366864	2367738	875	2366964	682.15	14.7472	1.37129	12.7417	NA_peak_137
NC_000962.3	2374083	2374606	524	2374478	943.75	14.5495	1.30383	12.5518	NA_peak_138
NC_000962.3	2396903	2397295	393	2397082	830.23	8.63836	1.23328	6.89999	NA_peak_139
NC_000962.3	2405219	2405534	316	2405369	995.09	7.65621	1.19464	5.96608	NA_peak_140
NC_000962.3	2420321	2420727	407	2420633	1096.77	4.5286	1.13172	3.0187	NA_peak_141
NC_000962.3	2422646	2423486	841	2422850	1147.12	9.3696	1.20449	7.5953	NA_peak_142
NC_000962.3	2423732	2424084	353	2423983	1031.61	16.4936	1.31209	14.4194	NA_peak_143
NC_000962.3	2424287	2424602	316	2424381	997.06	22.1281	1.38428	19.8319	NA_peak_144
NC_000962.3	2424749	2425023	275	2424811	795.68	3.8761	1.14104	2.41585	NA_peak_145
NC_000962.3	2445281	2445529	249	2445345	736.44	6.98201	1.21771	5.32595	NA_peak_146
NC_000962.3	2463017	2463266	250	2463079	1190.55	7.78814	1.17859	6.09159	NA_peak_147
NC_000962.3	2468161	2468429	269	2468315	972.38	6.29962	1.17417	4.67977	NA_peak_148
NC_000962.3	2469141	2469343	203	2469259	963.5	8.25865	1.20864	6.53884	NA_peak_149
NC_000962.3	2497629	2497892	264	2497725	921.05	6.61712	1.18485	4.9803	NA_peak_150
NC_000962.3	2497945	2498238	294	2498003	895.38	6.56357	1.18726	4.92938	NA_peak_151
NC_000962.3	2498313	2498610	298	2498477	896.37	7.25422	1.19969	5.58419	NA_peak_152
NC_000962.3	2529393	2529633	241	2529544	602.19	4.94166	1.19301	3.4036	NA_peak_153
NC_000962.3	2529849	2530080	232	2529935	656.48	5.5235	1.19891	3.94887	NA_peak_154
NC_000962.3	2564944	2565174	231	2565069	644.64	9.89089	1.29599	8.09135	NA_peak_155
NC_000962.3	2566693	2567025	333	2566917	710.78	7.2155	1.22763	5.5474	NA_peak_156
NC_000962.3	2579316	2580210	895	2579708	815.42	21.5715	1.42881	19.298	NA_peak_157
NC_000962.3	2610718	2612065	1348	2611821	987.19	25.8079	1.42802	23.3666	NA_peak_158
NC_000962.3	2613010	2614478	1469	2613780	1105.65	47.8214	1.60473	44.5618	NA_peak_159
NC_000962.3	2614608	2615697	1090	2615396	1049.38	35.7894	1.51265	32.9395	NA_peak_160
NC_000962.3	2616212	2617256	1045	2616761	1003.97	25.682	1.42348	23.2455	NA_peak_161
NC_000962.3	2626749	2626993	245	2626827	868.73	7.02744	1.19963	5.36907	NA_peak_162
NC_000962.3	2632936	2633459	524	2633273	1570.62	12.4609	1.20523	10.5495	NA_peak_163
NC_000962.3	2633578	2634268	691	2633655	1528.17	11.6315	1.19935	9.75401	NA_peak_164
NC_000962.3	2634380	2635437	1058	2634565	1052.35	39.1209	1.54359	36.1288	NA_peak_165
NC_000962.3	2637603	2638771	1169	2638395	934.87	17.5214	1.34464	15.4073	NA_peak_166
NC_000962.3	2655209	2655525	317	2655336	876.63	9.00717	1.23297	7.25089	NA_peak_167
NC_000962.3	2692009	2692913	905	2692159	1229.05	58.6828	1.64842	55.1488	NA_peak_168
NC_000962.3	2692986	2693228	243	2693041	970.41	3.07838	1.10765	1.69295	NA_peak_169
NC_000962.3	2744929	2745194	266	2745014	852.93	10.8984	1.26809	9.05308	NA_peak_170
NC_000962.3	2806765	2808010	1246	2806909	911.18	22.2288	1.40768	19.9281	NA_peak_171
NC_000962.3	2822402	2822804	403	2822631	611.07	5.83447	1.21395	4.24104	NA_peak_172
NC_000962.3	2840549	2840770	222	2840637	652.53	7.0949	1.23588	5.43329	NA_peak_173
NC_000962.3	2849298	2849782	485	2849402	900.32	5.11996	1.15851	3.57013	NA_peak_174
NC_000962.3	2866605	2866864	260	2866719	689.06	8.08445	1.24821	6.37357	NA_peak_175
NC_000962.3	2867439	2867764	326	2867603	714.73	8.70723	1.2565	6.96558	NA_peak_176
NC_000962.3	2877833	2878058	226	2877996	744.34	6.19533	1.19984	4.58111	NA_peak_177
NC_000962.3	2910835	2911034	200	2910940	696.96	5.81939	1.20006	4.22678	NA_peak_178
NC_000962.3	2921402	2921626	225	2921526	1159.95	13.5033	1.25698	11.5489	NA_peak_179
NC_000962.3	2935654	2935853	200	2935669	671.29	3.77285	1.15118	2.32149	NA_peak_180
NC_000962.3	2959259	2959653	395	2959422	742.37	8.77134	1.25146	7.02661	NA_peak_181
NC_000962.3	2961500	2961721	222	2961537	671.29	6.77219	1.22457	5.1272	NA_peak_182
NC_000962.3	2969716	2969956	241	2969926	775.93	5.13099	1.17326	3.58046	NA_peak_183
NC_000962.3	2979161	2979407	247	2979295	617.98	7.01353	1.24249	5.35583	NA_peak_184
NC_000962.3	3020175	3020594	420	3020535	958.56	5.54254	1.1617	3.96643	NA_peak_185
NC_000962.3	3042105	3042689	585	3042264	946.72	8.89322	1.22128	7.14257	NA_peak_186
NC_000962.3	3046908	3047804	897	3047253	955.6	12.7687	1.27717	10.8447	NA_peak_187
NC_000962.3	3047914	3048649	736	3048442	964.49	17.4928	1.33724	15.3801	NA_peak_188
NC_000962.3	3077962	3078225	264	3078104	763.1	8.20064	1.23641	6.48387	NA_peak_189
NC_000962.3	3092752	3093012	261	3092926	878.6	9.77421	1.24519	7.98038	NA_peak_190
NC_000962.3	3108170	3108466	297	3108313	836.15	9.21114	1.24206	7.44503	NA_peak_191
NC_000962.3	3147897	3148273	377	3148164	743.36	9.59206	1.26634	7.80698	NA_peak_192
NC_000962.3	3200132	3200337	206	3200282	791.73	4.48448	1.15625	2.97749	NA_peak_193
NC_000962.3	3213743	3213959	217	3213812	656.48	4.56594	1.17491	3.05326	NA_peak_194
NC_000962.3	3242147	3243105	959	3242859	948.69	20.2037	1.37437	17.9832	NA_peak_195
NC_000962.3	3243293	3244491	1199	3243873	927.96	21.7745	1.39904	19.4932	NA_peak_196
NC_000962.3	3283686	3284241	556	3283863	886.5	27.9217	1.48361	25.4054	NA_peak_197
NC_000962.3	3284673	3285177	505	3285014	814.43	10.2257	1.26345	8.41083	NA_peak_198
NC_000962.3	3298911	3299463	553	3299324	751.25	7.99837	1.23494	6.29177	NA_peak_199
NC_000962.3	3299778	3300970	1193	3300101	963.5	30.8927	1.49072	28.2512	NA_peak_200
NC_000962.3	3301465	3302223	759	3301983	899.33	19.8123	1.3813	17.6064	NA_peak_201
NC_000962.3	3302430	3302632	203	3302444	761.12	4.61373	1.16178	3.09796	NA_peak_202
NC_000962.3	3303544	3303831	288	3303735	630.82	5.89214	1.21312	4.29553	NA_peak_203
NC_000962.3	3308631	3309586	956	3309309	755.2	17.2706	1.38753	15.1667	NA_peak_204
NC_000962.3	3311816	3313084	1269	3312176	885.51	38.307	1.60136	35.3475	NA_peak_205
NC_000962.3	3348484	3348891	408	3348631	634.76	7.12264	1.24076	5.45952	NA_peak_206
NC_000962.3	3377375	3377610	236	3377499	805.55	18.3374	1.38821	16.1898	NA_peak_207
NC_000962.3	3378880	3379231	352	3379026	706.83	10.8762	1.29877	9.03198	NA_peak_208
NC_000962.3	3379840	3380050	211	3379947	771	12.6164	1.31292	10.6986	NA_peak_209
NC_000962.3	3414472	3415020	549	3414843	897.36	10.5932	1.25469	8.76134	NA_peak_210
NC_000962.3	3467985	3468424	440	3468010	787.78	5.32643	1.17588	3.76398	NA_peak_211
NC_000962.3	3477487	3479809	2323	3478150	789.75	23.1105	1.45895	20.7717	NA_peak_212
NC_000962.3	3485237	3485462	226	3485287	775.93	12.1197	1.30358	10.2221	NA_peak_213
NC_000962.3	3487304	3487770	467	3487584	876.63	13.8398	1.30716	11.8712	NA_peak_214
NC_000962.3	3487829	3488075	247	3487943	891.43	8.73046	1.22587	6.98763	NA_peak_215
NC_000962.3	3489236	3489495	260	3489320	829.24	6.09914	1.18606	4.49058	NA_peak_216
NC_000962.3	3489697	3490361	665	3489863	797.65	12.7144	1.30755	10.7931	NA_peak_217
NC_000962.3	3527650	3528539	890	3528149	723.61	9.3155	1.26592	7.54404	NA_peak_218
NC_000962.3	3583463	3583896	434	3583743	776.92	9.60199	1.26081	7.81656	NA_peak_219
NC_000962.3	3595422	3595942	521	3595661	998.05	25.7253	1.42396	23.2872	NA_peak_220
NC_000962.3	3700627	3700867	241	3700776	615.02	6.81987	1.23654	5.17229	NA_peak_221
NC_000962.3	3730968	3731424	457	3731216	1591.35	37.4576	1.40543	34.5354	NA_peak_222
NC_000962.3	3732781	3733813	1033	3733323	952.64	35.1645	1.54012	32.3402	NA_peak_223
NC_000962.3	3733989	3734988	1000	3734610	960.54	32.7752	1.51185	30.0533	NA_peak_224
NC_000962.3	3735045	3735506	462	3735323	925.99	21.1209	1.3917	18.8651	NA_peak_225
NC_000962.3	3736665	3736913	249	3736818	852.93	7.52977	1.21125	5.8456	NA_peak_226
NC_000962.3	3751155	3751951	797	3751605	892.42	19.9942	1.38558	17.7816	NA_peak_227
NC_000962.3	3752084	3752620	537	3752458	823.32	16.4177	1.35579	14.3465	NA_peak_228
NC_000962.3	3756341	3756737	397	3756586	739.41	4.67693	1.16636	3.15678	NA_peak_229
NC_000962.3	3761774	3762241	468	3761963	975.35	11.8513	1.26078	9.96525	NA_peak_230
NC_000962.3	3763480	3763846	367	3763602	955.6	11.4162	1.25802	9.54848	NA_peak_231
NC_000962.3	3765049	3765727	679	3765388	1104.67	43.4299	1.5661	40.275	NA_peak_232
NC_000962.3	3765985	3766282	298	3766156	920.06	16.8079	1.33739	14.722	NA_peak_233
NC_000962.3	3791057	3793297	2241	3791761	859.84	19.1284	1.38399	16.9477	NA_peak_234
NC_000962.3	3798493	3799113	621	3799029	644.64	9.89089	1.29599	8.09135	NA_peak_235
NC_000962.3	3831665	3831930	266	3831827	836.15	7.69457	1.21541	6.00266	NA_peak_236
NC_000962.3	3832106	3832356	251	3832236	872.68	7.06755	1.19978	5.40729	NA_peak_237
NC_000962.3	3834396	3834685	290	3834525	855.89	5.76074	1.17705	4.17157	NA_peak_238
NC_000962.3	3834750	3834994	245	3834861	864.78	7.70864	1.21258	6.0161	NA_peak_239
NC_000962.3	3842409	3842715	307	3842466	742.37	10.6905	1.2861	8.8541	NA_peak_240
NC_000962.3	3843028	3843537	510	3843152	743.36	19.9694	1.43145	17.7576	NA_peak_241
NC_000962.3	3880526	3881005	480	3880657	840.1	20.8438	1.41077	18.5993	NA_peak_242
NC_000962.3	3895582	3895885	304	3895769	722.62	10.8774	1.2945	9.03312	NA_peak_243
NC_000962.3	3902647	3903010	364	3902731	918.09	8.2574	1.2138	6.53764	NA_peak_244
NC_000962.3	3907126	3907743	618	3907486	1169.82	44.3619	1.55323	41.1861	NA_peak_245
NC_000962.3	3922186	3922392	207	3922282	754.21	3.80137	1.14253	2.34767	NA_peak_246
NC_000962.3	4024677	4025563	887	4025026	1097.76	31.6489	1.45917	28.9743	NA_peak_247
NC_000962.3	4036910	4037243	334	4037090	869.72	9.96826	1.24995	8.16517	NA_peak_248
NC_000962.3	4040552	4040911	360	4040663	1022.73	11.4292	1.24845	9.56099	NA_peak_249
NC_000962.3	4041273	4041575	303	4041418	1020.76	15.4873	1.30187	13.4536	NA_peak_250
NC_000962.3	4054137	4054885	749	4054515	854.91	14.8033	1.32617	12.7958	NA_peak_251
NC_000962.3	4055094	4056633	1540	4056340	886.5	26.8327	1.47083	24.3558	NA_peak_252
NC_000962.3	4056786	4057425	640	4056933	840.1	16.1935	1.34792	14.1314	NA_peak_253
NC_000962.3	4062179	4062534	356	4062365	916.11	23.2439	1.41836	20.8996	NA_peak_254
NC_000962.3	4099193	4099623	431	4099348	1025.69	31.4758	1.47768	28.8088	NA_peak_255
NC_000962.3	4100507	4101157	651	4100870	1182.66	82.8188	1.85759	78.3172	NA_peak_256
NC_000962.3	4119091	4119566	476	4119397	993.11	23.8271	1.40443	21.4601	NA_peak_257
NC_000962.3	4149090	4149395	306	4149238	892.42	7.50514	1.20472	5.82244	NA_peak_258
NC_000962.3	4167641	4167928	288	4167762	893.41	6.37603	1.18402	4.75184	NA_peak_259
NC_000962.3	4168054	4168639	586	4168352	1024.7	16.927	1.31873	14.8361	NA_peak_260
NC_000962.3	4198270	4198520	251	4198372	980.28	6.23504	1.1721	4.61881	NA_peak_261
NC_000962.3	4216855	4217099	245	4216979	661.42	4.7253	1.17818	3.20172	NA_peak_262
NC_000962.3	4224824	4225162	339	4225005	942.77	12.7604	1.27951	10.8369	NA_peak_263
NC_000962.3	4231076	4231279	204	4231256	801.6	4.64978	1.15882	3.13132	NA_peak_264
NC_000962.3	4262913	4263395	483	4263107	1143.17	20.0232	1.33167	17.8095	NA_peak_265
NC_000962.3	4265232	4266270	1039	4266067	1098.74	13.0857	1.25973	11.1483	NA_peak_266
NC_000962.3	4266681	4266968	288	4266816	955.6	8.55644	1.21458	6.82185	NA_peak_267
NC_000962.3	4286827	4287690	864	4287438	894.4	11.8807	1.27477	9.99331	NA_peak_268
NC_000962.3	4287754	4288369	616	4287921	956.59	13.3766	1.28535	11.4278	NA_peak_269
NC_000962.3	4288509	4289040	532	4288779	1010.88	12.7244	1.26802	10.8026	NA_peak_270
NC_000962.3	4290526	4290925	400	4290741	1076.04	9.63002	1.21562	7.84322	NA_peak_271
NC_000962.3	4291406	4292408	1003	4291730	1070.12	15.7482	1.29581	13.7041	NA_peak_272
NC_000962.3	4294171	4294427	257	4294266	1094.8	8.91187	1.20417	7.16026	NA_peak_273
NC_000962.3	4298912	4301125	2214	4299636	1121.45	31.8017	1.45395	29.1212	NA_peak_274
NC_000962.3	4305856	4306979	1124	4306238	1089.86	27.2997	1.41854	24.8061	NA_peak_275
NC_000962.3	4313848	4314511	664	4314121	1065.18	17.9668	1.3228	15.8346	NA_peak_276
NC_000962.3	4314707	4314907	201	4314857	952.64	5.1134	1.15397	3.56433	NA_peak_277
NC_000962.3	4320321	4320612	292	4320474	696.96	14.1199	1.35789	12.1401	NA_peak_278
NC_000962.3	4321371	4321652	282	4321493	694	14.4772	1.36488	12.4822	NA_peak_279
NC_000962.3	4339857	4341075	1219	4340267	870.7	15.7701	1.33574	13.7252	NA_peak_280
NC_000962.3	4341282	4341626	345	4341439	824.3	10.1416	1.26001	8.33043	NA_peak_281
NC_000962.3	4350528	4350763	236	4350623	931.91	5.89189	1.17141	4.2953	NA_peak_282
NC_000962.3	4352096	4353175	1080	4352692	1066.17	9.43269	1.21407	7.65558	NA_peak_283
NC_000962.3	4359263	4360008	746	4359551	1122.44	16.9468	1.30178	14.855	NA_peak_284
NC_000962.3	4360634	4360893	260	4360636	949.68	3.1861	1.1119	1.79023	NA_peak_285
NC_000962.3	4371112	4371973	862	4371688	969.42	23.3816	1.406	21.0325	NA_peak_286
NC_000962.3	4372376	4372872	497	4372569	971.4	18.8627	1.35243	16.6929	NA_peak_287
NC_000962.3	4374130	4374329	200	4374251	818.38	6.43822	1.19443	4.81094	NA_peak_288
NC_000962.3	4385783	4386376	594	4386035	926.97	11.3731	1.26255	9.50729	NA_peak_289
NC_000962.3	4387117	4388527	1411	4387407	955.6	19.8268	1.36802	17.6204	NA_peak_290
NC_000962.3	4393010	4393474	465	4393155	973.37	11.3731	1.25434	9.50728	NA_peak_291
NC_000962.3	4411048	4411348	301	4411246	1096.77	9.83275	1.21704	8.03608	NA_peak_292

## Sheet: propionate Replicate 2
# This file is generated by MACS version 2.2.6
# Command line: callpeak -t P2-ChIP_S10_R1_001.sorted.bam -c P2-Inp_S4_R1_001.sorted.bam -g 4411532 --mfold 2 80 -s 50 --nomodel --keep-dup all --outdir ../macs_out/single_sample/P2/
# ARGUMENTS LIST:
# name = NA
# format = AUTO
# ChIP-seq file = ['P2-ChIP_S10_R1_001.sorted.bam']
# control file = ['P2-Inp_S4_R1_001.sorted.bam']
# effective genome size = 4.41e+06
# band width = 300
# model fold = [2, 80]
# qvalue cutoff = 5.00e-02
# The maximum gap between significant sites is assigned as the read length/tag size.
# The minimum length of peaks is assigned as the predicted fragment length "d".
# Larger dataset will be scaled towards smaller dataset.
# Range for calculating regional lambda is: 1000 bps and 10000 bps
# Broad region calling is off
# Paired-End mode is off
# tag size is determined as 50 bps
# total tags in treatment: 12225249
# total tags in control: 13086782
# d = 200
chr	start	end	length	abs_summit	pileup	#NAME?	fold_enrichment	#NAME?	name
NC_000962.3	24522	24880	359	24740	1119	6.98961	1.17189	5.41257	NA_peak_1
NC_000962.3	25440	25723	284	25541	1218	11.9073	1.2298	10.1258	NA_peak_2
NC_000962.3	33827	34353	527	34119	950	27.6619	1.45888	25.3477	NA_peak_3
NC_000962.3	34979	35523	545	35136	992	23.5873	1.40185	21.4179	NA_peak_4
NC_000962.3	50458	50849	392	50743	988	11.1422	1.24836	9.38741	NA_peak_5
NC_000962.3	57905	58126	222	58102	2755	25.6005	1.23076	23.3633	NA_peak_6
NC_000962.3	105936	106135	200	106056	701	8.2092	1.24814	6.5746	NA_peak_7
NC_000962.3	135827	138096	2270	137764	1014	21.8388	1.37697	19.7264	NA_peak_8
NC_000962.3	150978	151186	209	151092	697	4.67233	1.17101	3.23059	NA_peak_9
NC_000962.3	186758	187244	487	186982	7301	82.6966	1.2646	78.8521	NA_peak_10
NC_000962.3	225775	226080	306	225957	1121	10.7226	1.22549	8.98255	NA_peak_11
NC_000962.3	226616	226921	306	226776	1153	16.7966	1.29479	14.8508	NA_peak_12
NC_000962.3	238545	238903	359	238842	1046	3.46111	1.11181	2.11503	NA_peak_13
NC_000962.3	244644	244852	209	244666	1197	4.00934	1.11508	2.61726	NA_peak_14
NC_000962.3	251498	252508	1011	252119	1327	19.0054	1.29344	16.9855	NA_peak_15
NC_000962.3	252722	253254	533	253139	1250	7.98822	1.17607	6.36392	NA_peak_16
NC_000962.3	253457	253867	411	253525	1363	13.21	1.23002	11.3847	NA_peak_17
NC_000962.3	296548	297130	583	296942	880	8.04623	1.21521	6.41908	NA_peak_18
NC_000962.3	300728	301226	499	301144	790	10.5909	1.27355	8.85567	NA_peak_19
NC_000962.3	301413	301820	408	301595	816	5.67143	1.17856	4.16388	NA_peak_20
NC_000962.3	308840	309222	383	309012	760	7.13281	1.2161	5.54889	NA_peak_21
NC_000962.3	331682	332028	347	331854	842	26.7206	1.4842	24.4428	NA_peak_22
NC_000962.3	332499	332764	266	332626	886	7.8509	1.211	6.23273	NA_peak_23
NC_000962.3	334071	334381	311	334182	875	7.43992	1.2052	5.841	NA_peak_24
NC_000962.3	334469	334776	308	334657	993	14.5996	1.29435	12.7271	NA_peak_25
NC_000962.3	335239	335569	331	335401	822	9.23564	1.24461	7.55398	NA_peak_26
NC_000962.3	337123	337342	220	337192	900	11.131	1.26192	9.37655	NA_peak_27
NC_000962.3	339098	339438	341	339282	1095	10.8112	1.22972	9.06772	NA_peak_28
NC_000962.3	339972	340327	356	340147	1101	4.66011	1.13312	3.2191	NA_peak_29
NC_000962.3	370080	371162	1083	370489	1092	19.832	1.33859	17.7834	NA_peak_30
NC_000962.3	371318	372514	1197	371641	1182	29.5735	1.41799	27.189	NA_peak_31
NC_000962.3	372680	373833	1154	372876	1053	20.1925	1.35015	18.1325	NA_peak_32
NC_000962.3	382475	382675	201	382577	686	7.52823	1.2373	5.92518	NA_peak_33
NC_000962.3	408466	408678	213	408578	824	10.996	1.27351	9.24609	NA_peak_34
NC_000962.3	409515	410579	1065	409832	1040	42.1956	1.57647	39.426	NA_peak_35
NC_000962.3	431714	432511	798	432308	1034	19.4409	1.34545	17.406	NA_peak_36
NC_000962.3	432597	433006	410	432950	989	3.8392	1.12374	2.46068	NA_peak_37
NC_000962.3	473988	474211	224	474122	707	9.67884	1.27512	7.97894	NA_peak_38
NC_000962.3	483634	487275	3642	485668	1224	39.2788	1.49342	36.592	NA_peak_39
NC_000962.3	488993	490050	1058	489782	940	17.7336	1.34475	15.7562	NA_peak_40
NC_000962.3	532494	532708	215	532546	1053	4.94792	1.1419	3.48693	NA_peak_41
NC_000962.3	538901	540267	1367	539084	1293	36.0926	1.45035	33.4979	NA_peak_42
NC_000962.3	540380	542239	1860	541696	1373	62.8658	1.63086	59.5644	NA_peak_43
NC_000962.3	545037	545830	794	545427	970	10.6079	1.24323	8.87198	NA_peak_44
NC_000962.3	547448	547702	255	547613	781	5.89553	1.18771	4.37472	NA_peak_45
NC_000962.3	557288	559305	2018	558884	2000	66.3991	1.50987	63.0044	NA_peak_46
NC_000962.3	559541	560895	1355	560556	1680	33.4876	1.3646	30.9737	NA_peak_47
NC_000962.3	574845	575095	251	574939	1139	7.41042	1.17672	5.81311	NA_peak_48
NC_000962.3	592603	592822	220	592696	1071	11.5444	1.24254	9.77547	NA_peak_49
NC_000962.3	597926	599887	1962	599693	1303	41.2397	1.48964	38.4986	NA_peak_50
NC_000962.3	602067	602471	405	602197	938	7.65935	1.20111	6.05014	NA_peak_51
NC_000962.3	611525	611802	278	611701	829	4.27029	1.14634	2.85778	NA_peak_52
NC_000962.3	622061	622306	246	622231	1182	9.86475	1.20759	8.15724	NA_peak_53
NC_000962.3	623275	624023	749	623625	1150	20.0707	1.33076	18.0147	NA_peak_54
NC_000962.3	631556	631792	237	631672	907	13.0599	1.28899	11.24	NA_peak_55
NC_000962.3	672042	672662	621	672331	741	4.85332	1.16967	3.39867	NA_peak_56
NC_000962.3	672830	673101	272	673032	763	9.56386	1.26118	7.86851	NA_peak_57
NC_000962.3	673578	674096	519	673760	859	12.9332	1.2965	11.1174	NA_peak_58
NC_000962.3	674219	674418	200	674306	854	2.97837	1.112	1.68007	NA_peak_59
NC_000962.3	674529	674982	454	674665	780	5.71807	1.18407	4.20781	NA_peak_60
NC_000962.3	675211	675629	419	675432	775	9.65192	1.26039	7.95307	NA_peak_61
NC_000962.3	697815	698057	243	697902	683	7.09682	1.22879	5.51457	NA_peak_62
NC_000962.3	731303	731506	204	731429	821	7.59619	1.21559	5.98994	NA_peak_63
NC_000962.3	733309	733693	385	733499	1137	14.9043	1.2755	13.0207	NA_peak_64
NC_000962.3	747022	747571	550	747266	1125	20.0005	1.3344	17.9466	NA_peak_65
NC_000962.3	759361	759802	442	759514	850	14.4165	1.32011	12.5503	NA_peak_66
NC_000962.3	781230	781611	382	781467	1070	13.507	1.26813	11.6712	NA_peak_67
NC_000962.3	836054	836692	639	836148	1093	9.35113	1.20972	7.66455	NA_peak_68
NC_000962.3	837419	837825	407	837771	1094	7.23648	1.17797	5.64753	NA_peak_69
NC_000962.3	838634	838932	299	838634	1041	2.94129	1.09995	1.64689	NA_peak_70
NC_000962.3	839016	839216	201	839064	917	5.74871	1.16894	4.23632	NA_peak_71
NC_000962.3	839521	839853	333	839706	993	6.9815	1.1835	5.40481	NA_peak_72
NC_000962.3	839965	840200	236	840035	919	12.483	1.27856	10.6822	NA_peak_73
NC_000962.3	847972	849552	1581	849230	1354	73.8987	1.71438	70.3448	NA_peak_74
NC_000962.3	898642	899108	467	898881	834	26.1177	1.4797	23.8621	NA_peak_75
NC_000962.3	899713	900070	358	899949	760	7.54133	1.22414	5.93765	NA_peak_76
NC_000962.3	904837	905286	450	904961	1249	11.542	1.22214	9.77314	NA_peak_77
NC_000962.3	916248	916613	366	916550	1089	6.13905	1.16047	4.60438	NA_peak_78
NC_000962.3	925286	925971	686	925601	1048	11.5914	1.24621	9.82092	NA_peak_79
NC_000962.3	926444	927361	918	926581	1061	9.08067	1.20931	7.40544	NA_peak_80
NC_000962.3	929875	930165	291	930034	1094	11.4974	1.23898	9.72994	NA_peak_81
NC_000962.3	965658	965905	248	965870	1148	3.48913	1.10702	2.14051	NA_peak_82
NC_000962.3	967585	967868	284	967673	1105	5.07193	1.14052	3.6025	NA_peak_83
NC_000962.3	968727	969525	799	969357	1144	22.029	1.35225	19.9109	NA_peak_84
NC_000962.3	969606	969921	316	969777	1030	9.48539	1.21885	7.79313	NA_peak_85
NC_000962.3	1038660	1038911	252	1038770	892	6.42139	1.18445	4.8719	NA_peak_86
NC_000962.3	1039805	1040159	355	1039994	953	17.3631	1.33727	15.3986	NA_peak_87
NC_000962.3	1040242	1040546	305	1040447	860	8.86109	1.23207	7.19588	NA_peak_88
NC_000962.3	1065341	1066154	814	1066079	814	9.98745	1.2588	8.27514	NA_peak_89
NC_000962.3	1091071	1091428	358	1091296	734	10.659	1.28673	8.92141	NA_peak_90
NC_000962.3	1091611	1092045	435	1091886	838	13.4826	1.30909	11.6475	NA_peak_91
NC_000962.3	1097303	1097567	265	1097431	896	5.67964	1.16975	4.17169	NA_peak_92
NC_000962.3	1101769	1106529	4761	1104744	1318	43.0694	1.50037	40.2737	NA_peak_93
NC_000962.3	1110585	1110806	222	1110686	959	8.89234	1.21865	7.22562	NA_peak_94
NC_000962.3	1123448	1123702	255	1123655	1004	7.04395	1.18343	5.46446	NA_peak_95
NC_000962.3	1127677	1128027	351	1127865	1240	18.9002	1.30436	16.8837	NA_peak_96
NC_000962.3	1179141	1179353	213	1179231	689	6.62421	1.21751	5.06474	NA_peak_97
NC_000962.3	1190340	1190757	418	1190586	1255	20.0956	1.31419	18.0388	NA_peak_98
NC_000962.3	1192079	1192541	463	1192212	1139	17.6527	1.30647	15.6783	NA_peak_99
NC_000962.3	1196212	1197514	1303	1197373	1405	20.3828	1.29651	18.3168	NA_peak_100
NC_000962.3	1212596	1212802	207	1212672	932	8.02392	1.20798	6.39775	NA_peak_101
NC_000962.3	1214251	1214550	300	1214312	1282	15.3959	1.26225	13.4966	NA_peak_102
NC_000962.3	1214872	1215479	608	1215099	1237	19.8694	1.31463	17.8197	NA_peak_103
NC_000962.3	1217404	1217614	211	1217454	890	3.05385	1.11155	1.74764	NA_peak_104
NC_000962.3	1240033	1240463	431	1240166	1143	14.6412	1.27158	12.7672	NA_peak_105
NC_000962.3	1240757	1241070	314	1240954	1096	17.7724	1.31491	15.7939	NA_peak_106
NC_000962.3	1254467	1257524	3058	1255966	1641	112.346	1.84581	107.472	NA_peak_107
NC_000962.3	1275703	1276084	382	1275757	915	4.70526	1.14809	3.26096	NA_peak_108
NC_000962.3	1287107	1287431	325	1287296	796	6.25406	1.19312	4.71303	NA_peak_109
NC_000962.3	1291772	1292212	441	1292156	793	9.45194	1.25349	7.76116	NA_peak_110
NC_000962.3	1305895	1306283	389	1305977	809	7.61254	1.21769	6.00558	NA_peak_111
NC_000962.3	1313117	1313923	807	1313572	1068	27.6138	1.42573	25.3012	NA_peak_112
NC_000962.3	1325272	1325840	569	1325491	1176	29.4769	1.41843	27.0962	NA_peak_113
NC_000962.3	1326620	1326849	230	1326698	803	2.84191	1.11186	1.55841	NA_peak_114
NC_000962.3	1334984	1335402	419	1335325	902	7.04663	1.19475	5.46698	NA_peak_115
NC_000962.3	1338203	1338567	365	1338486	733	3.77082	1.14359	2.3985	NA_peak_116
NC_000962.3	1354120	1354379	260	1354211	683	4.26476	1.16247	2.85285	NA_peak_117
NC_000962.3	1364265	1364781	517	1364457	964	10.8182	1.24718	9.07445	NA_peak_118
NC_000962.3	1376426	1376699	274	1376607	697	8.62149	1.25711	6.9672	NA_peak_119
NC_000962.3	1385303	1385514	212	1385486	769	8.99875	1.24989	7.32698	NA_peak_120
NC_000962.3	1385747	1385985	239	1385922	811	5.67743	1.17929	4.1696	NA_peak_121
NC_000962.3	1412970	1413333	364	1413272	792	14.4599	1.33458	12.5922	NA_peak_122
NC_000962.3	1460602	1461481	880	1460904	855	11.0801	1.26902	9.32721	NA_peak_123
NC_000962.3	1471517	1477571	6055	1475978	1538	100.159	1.81424	95.7105	NA_peak_124
NC_000962.3	1524401	1525382	982	1525217	725	9.15757	1.26148	7.479	NA_peak_125
NC_000962.3	1546998	1547247	250	1547101	754	5.1366	1.1746	3.66281	NA_peak_126
NC_000962.3	1561277	1561840	564	1561656	889	17.6201	1.35508	15.6468	NA_peak_127
NC_000962.3	1562070	1562349	280	1562308	863	2.78974	1.10623	1.51242	NA_peak_128
NC_000962.3	1562405	1563179	775	1562824	890	3.91316	1.13267	2.5284	NA_peak_129
NC_000962.3	1564232	1564663	432	1564486	1020	3.74899	1.11975	2.3782	NA_peak_130
NC_000962.3	1573907	1574160	254	1574015	753	4.70022	1.16458	3.25669	NA_peak_131
NC_000962.3	1574422	1574836	415	1574598	798	21.9628	1.43902	19.8467	NA_peak_132
NC_000962.3	1628479	1628685	207	1628571	679	6.07449	1.20702	4.54328	NA_peak_133
NC_000962.3	1630738	1631074	337	1630948	915	7.26999	1.19715	5.67922	NA_peak_134
NC_000962.3	1631816	1632110	295	1631954	829	9.34618	1.24531	7.65984	NA_peak_135
NC_000962.3	1632174	1633182	1009	1633031	986	7.96353	1.20054	6.34038	NA_peak_136
NC_000962.3	1636290	1636565	276	1636441	1044	7.77233	1.19122	6.15769	NA_peak_137
NC_000962.3	1636738	1636988	251	1636968	1364	9.48552	1.18693	7.79326	NA_peak_138
NC_000962.3	1646911	1647675	765	1647095	1007	17.5651	1.32875	15.5937	NA_peak_139
NC_000962.3	1677841	1678179	339	1678150	806	4.67055	1.15789	3.2289	NA_peak_140
NC_000962.3	1679123	1680421	1299	1679526	1181	29.5917	1.41838	27.2066	NA_peak_141
NC_000962.3	1690789	1694662	3874	1692404	1204	46.0943	1.55586	43.2049	NA_peak_142
NC_000962.3	1694935	1697859	2925	1697406	1066	37.0418	1.51873	34.4196	NA_peak_143
NC_000962.3	1699777	1701222	1446	1700850	998	29.5493	1.46479	27.1658	NA_peak_144
NC_000962.3	1712367	1712990	624	1712478	852	15.7592	1.33874	13.8479	NA_peak_145
NC_000962.3	1714834	1715596	763	1715058	932	23.1774	1.41292	21.0211	NA_peak_146
NC_000962.3	1735363	1736524	1162	1735607	1070	64.5778	1.76525	61.2371	NA_peak_147
NC_000962.3	1751542	1751826	285	1751667	746	14.3672	1.34536	12.5027	NA_peak_148
NC_000962.3	1752098	1752616	519	1752233	813	14.2425	1.32613	12.3821	NA_peak_149
NC_000962.3	1848190	1848460	271	1848357	798	6.92637	1.20624	5.35255	NA_peak_150
NC_000962.3	1851972	1852380	409	1852168	1010	16.4994	1.31521	14.5638	NA_peak_151
NC_000962.3	1855491	1856117	627	1855577	1010	9.5854	1.22278	7.88903	NA_peak_152
NC_000962.3	1863569	1864240	672	1863997	890	9.04256	1.23059	7.36898	NA_peak_153
NC_000962.3	1891054	1891294	241	1891171	673	6.33169	1.21389	4.78657	NA_peak_154
NC_000962.3	1974037	1974250	214	1974162	828	9.16684	1.24242	7.4879	NA_peak_155
NC_000962.3	1982312	1982866	555	1982732	942	32.8203	1.51782	30.3259	NA_peak_156
NC_000962.3	1983362	1984010	649	1983782	953	42.6311	1.61569	39.8487	NA_peak_157
NC_000962.3	1990249	1990528	280	1990393	768	6.57978	1.20373	5.0226	NA_peak_158
NC_000962.3	1991276	1991806	531	1991347	839	3.69082	1.13153	2.32506	NA_peak_159
NC_000962.3	1993147	1993459	313	1993225	853	4.523	1.14981	3.09189	NA_peak_160
NC_000962.3	2001001	2001313	313	2001186	691	4.82769	1.17569	3.37494	NA_peak_161
NC_000962.3	2001526	2002086	561	2001965	704	4.96488	1.17722	3.50239	NA_peak_162
NC_000962.3	2017633	2017919	287	2017755	875	14.2126	1.31175	12.3535	NA_peak_163
NC_000962.3	2019013	2019296	284	2019275	722	4.36827	1.16022	2.94831	NA_peak_164
NC_000962.3	2027865	2028233	369	2028055	880	8.69462	1.22627	7.03712	NA_peak_165
NC_000962.3	2053013	2053389	377	2053207	675	6.50899	1.21749	4.95501	NA_peak_166
NC_000962.3	2062151	2062380	230	2062296	827	10.4496	1.26407	8.7196	NA_peak_167
NC_000962.3	2072327	2072581	255	2072446	1012	7.71442	1.19364	6.1025	NA_peak_168
NC_000962.3	2075639	2075849	211	2075687	1166	8.41978	1.18922	6.77507	NA_peak_169
NC_000962.3	2121445	2123281	1837	2121926	1405	26.4854	1.35001	24.2163	NA_peak_170
NC_000962.3	2135207	2135462	256	2135349	1041	6.86174	1.17678	5.29094	NA_peak_171
NC_000962.3	2136069	2136341	273	2136171	1013	10.8702	1.24099	9.12469	NA_peak_172
NC_000962.3	2139800	2140117	318	2140082	756	4.35268	1.15587	2.93367	NA_peak_173
NC_000962.3	2145440	2146129	690	2145827	820	17.7816	1.37521	15.8027	NA_peak_174
NC_000962.3	2163396	2163748	353	2163633	873	23.9159	1.43922	21.736	NA_peak_175
NC_000962.3	2165535	2166058	524	2165704	1095	34.7996	1.48875	32.2464	NA_peak_176
NC_000962.3	2168193	2169964	1772	2168664	1024	39.9263	1.56063	37.2222	NA_peak_177
NC_000962.3	2170637	2171172	536	2170813	751	15.032	1.35437	13.1442	NA_peak_178
NC_000962.3	2178885	2179152	268	2178966	1068	13.9684	1.27421	12.1173	NA_peak_179
NC_000962.3	2198957	2199268	312	2199049	672	6.24397	1.21209	4.70359	NA_peak_180
NC_000962.3	2223043	2223450	408	2223357	826	8.11758	1.22433	6.48715	NA_peak_181
NC_000962.3	2268172	2268913	742	2268346	915	16.7458	1.3376	14.8017	NA_peak_182
NC_000962.3	2325419	2325838	420	2325693	826	10.893	1.27146	9.14667	NA_peak_183
NC_000962.3	2333656	2333937	282	2333809	673	6.33169	1.21389	4.78657	NA_peak_184
NC_000962.3	2339493	2339716	224	2339576	847	14.1806	1.31737	12.3225	NA_peak_185
NC_000962.3	2339828	2340475	648	2340099	817	10.1887	1.26161	8.46865	NA_peak_186
NC_000962.3	2340530	2340843	314	2340766	756	13.8469	1.33441	11.9995	NA_peak_187
NC_000962.3	2357526	2357878	353	2357848	838	6.18531	1.18632	4.64805	NA_peak_188
NC_000962.3	2366878	2367810	933	2367123	794	21.2013	1.43012	19.1082	NA_peak_189
NC_000962.3	2374083	2374507	425	2374433	1040	12.1071	1.25425	10.3188	NA_peak_190
NC_000962.3	2387523	2387738	216	2387608	698	6.85485	1.22087	5.28437	NA_peak_191
NC_000962.3	2388882	2389144	263	2388982	722	4.72368	1.16899	3.27812	NA_peak_192
NC_000962.3	2396898	2397225	328	2397035	957	7.9413	1.20355	6.31922	NA_peak_193
NC_000962.3	2401737	2401979	243	2401902	971	11.4117	1.25472	9.64728	NA_peak_194
NC_000962.3	2420493	2420830	338	2420646	1300	9.91467	1.19742	8.20494	NA_peak_195
NC_000962.3	2421013	2421408	396	2421265	1148	7.62484	1.17918	6.01715	NA_peak_196
NC_000962.3	2422074	2422396	323	2422318	1285	10.7431	1.20898	9.00233	NA_peak_197
NC_000962.3	2422702	2423168	467	2422952	1383	13.5214	1.23146	11.685	NA_peak_198
NC_000962.3	2423309	2425032	1724	2423971	1220	45.9646	1.54997	43.0799	NA_peak_199
NC_000962.3	2443216	2443479	264	2443304	886	9.67	1.2414	7.97053	NA_peak_200
NC_000962.3	2445294	2445537	244	2445396	916	7.43533	1.19992	5.83659	NA_peak_201
NC_000962.3	2469966	2470257	292	2470112	939	4.0997	1.13307	2.70014	NA_peak_202
NC_000962.3	2477179	2477420	242	2477297	858	5.2414	1.16484	3.76056	NA_peak_203
NC_000962.3	2497674	2498611	938	2497828	1039	7.87795	1.1934	6.25861	NA_peak_204
NC_000962.3	2564970	2565243	274	2565107	812	23.6609	1.45648	21.489	NA_peak_205
NC_000962.3	2566829	2567046	218	2566924	811	6.30931	1.19223	4.76553	NA_peak_206
NC_000962.3	2579257	2580005	749	2579733	948	27.1703	1.45402	24.8748	NA_peak_207
NC_000962.3	2599833	2600088	256	2600010	659	3.91647	1.15619	2.53146	NA_peak_208
NC_000962.3	2610822	2612117	1296	2611696	1222	43.3019	1.52751	40.499	NA_peak_209
NC_000962.3	2612835	2614538	1704	2613914	1294	57.5562	1.61752	54.3892	NA_peak_210
NC_000962.3	2614592	2615740	1149	2615190	1207	31.8922	1.43351	29.4285	NA_peak_211
NC_000962.3	2616331	2617093	763	2616687	1239	38.7709	1.48532	36.0996	NA_peak_212
NC_000962.3	2626806	2627115	310	2626929	967	5.5473	1.16029	4.0476	NA_peak_213
NC_000962.3	2631789	2632110	322	2631873	893	9.01258	1.22965	7.34025	NA_peak_214
NC_000962.3	2632920	2635451	2532	2633143	1783	26.7403	1.30528	24.4617	NA_peak_215
NC_000962.3	2637607	2638869	1263	2638536	1162	48.5456	1.58984	45.5905	NA_peak_216
NC_000962.3	2639056	2639392	337	2639153	836	10.5228	1.2636	8.78998	NA_peak_217
NC_000962.3	2691994	2692817	824	2692151	1471	69.0853	1.64298	65.6321	NA_peak_218
NC_000962.3	2744862	2745325	464	2745037	918	8.81484	1.22287	7.15189	NA_peak_219
NC_000962.3	2755148	2755397	250	2755270	1058	7.05245	1.17832	5.47249	NA_peak_220
NC_000962.3	2759519	2759731	213	2759599	1084	5.63598	1.15216	4.13071	NA_peak_221
NC_000962.3	2795455	2795931	477	2795567	670	6.07039	1.20849	4.53941	NA_peak_222
NC_000962.3	2802192	2802576	385	2802420	819	9.85425	1.25565	8.14715	NA_peak_223
NC_000962.3	2802938	2803426	489	2803294	869	10.3489	1.25502	8.62287	NA_peak_224
NC_000962.3	2803902	2804125	224	2804019	891	10.6644	1.25628	8.92658	NA_peak_225
NC_000962.3	2804444	2804769	326	2804611	903	8.90162	1.22639	7.23446	NA_peak_226
NC_000962.3	2804830	2805029	200	2804880	791	4.98653	1.16671	3.52284	NA_peak_227
NC_000962.3	2805243	2805888	646	2805537	836	13.6547	1.31209	11.8139	NA_peak_228
NC_000962.3	2806747	2808010	1264	2806954	1114	38.8192	1.52034	36.1463	NA_peak_229
NC_000962.3	2822513	2822773	261	2822696	705	5.51405	1.19003	4.01627	NA_peak_230
NC_000962.3	2849178	2849607	430	2849448	1020	9.6097	1.2219	7.91238	NA_peak_231
NC_000962.3	2860394	2860683	290	2860469	693	6.2164	1.20784	4.6776	NA_peak_232
NC_000962.3	2866563	2866874	312	2866810	766	10.2309	1.2723	8.50919	NA_peak_233
NC_000962.3	2867382	2867758	377	2867561	769	8.63493	1.24325	6.98012	NA_peak_234
NC_000962.3	2876988	2877352	365	2877160	795	8.42048	1.23479	6.77575	NA_peak_235
NC_000962.3	2910793	2911224	432	2911124	771	7.63747	1.22417	6.02919	NA_peak_236
NC_000962.3	2919273	2919509	237	2919396	1364	9.72138	1.18983	8.0198	NA_peak_237
NC_000962.3	2959179	2959704	526	2959339	830	11.1185	1.27432	9.36442	NA_peak_238
NC_000962.3	2960217	2961768	1552	2961119	790	8.5393	1.2378	6.88895	NA_peak_239
NC_000962.3	2969576	2969807	232	2969712	885	3.97007	1.1344	2.58108	NA_peak_240
NC_000962.3	2970719	2970935	217	2970883	730	6.16586	1.20078	4.62966	NA_peak_241
NC_000962.3	2979120	2979394	275	2979292	667	5.81469	1.20308	4.29815	NA_peak_242
NC_000962.3	2982611	2982844	234	2982789	742	10.2978	1.27857	8.57361	NA_peak_243
NC_000962.3	3011568	3011896	329	3011624	952	7.44748	1.19587	5.84821	NA_peak_244
NC_000962.3	3020234	3020893	660	3020744	1050	6.8372	1.17553	5.26765	NA_peak_245
NC_000962.3	3042076	3042766	691	3042583	1111	14.1815	1.27058	12.3233	NA_peak_246
NC_000962.3	3047170	3048563	1394	3048303	1147	27.2852	1.40402	24.9858	NA_peak_247
NC_000962.3	3054223	3054478	256	3054293	1022	17.1359	1.32071	15.1789	NA_peak_248
NC_000962.3	3058779	3058979	201	3058887	881	4.60814	1.14907	3.17094	NA_peak_249
NC_000962.3	3086747	3087021	275	3086897	791	7.39051	1.21625	5.79403	NA_peak_250
NC_000962.3	3147292	3147631	340	3147484	772	11.7861	1.29725	10.0087	NA_peak_251
NC_000962.3	3214080	3214327	248	3214228	782	7.69587	1.22349	6.08481	NA_peak_252
NC_000962.3	3242229	3243049	821	3242879	1127	31.1814	1.44598	28.7421	NA_peak_253
NC_000962.3	3243302	3244544	1243	3243490	1099	20.4283	1.34378	18.3607	NA_peak_254
NC_000962.3	3283656	3284197	542	3283856	976	26.7216	1.44082	24.4437	NA_peak_255
NC_000962.3	3284736	3285165	430	3284967	959	17.6045	1.33901	15.6318	NA_peak_256
NC_000962.3	3293873	3294094	222	3293991	799	6.71693	1.20198	5.15301	NA_peak_257
NC_000962.3	3298810	3299461	652	3299411	848	5.78596	1.17713	4.27138	NA_peak_258
NC_000962.3	3299838	3301050	1213	3300675	1068	22.3136	1.37034	20.186	NA_peak_259
NC_000962.3	3301459	3302294	836	3302035	1000	14.5471	1.29246	12.6763	NA_peak_260
NC_000962.3	3308631	3309582	952	3309089	878	21.2871	1.40509	19.1915	NA_peak_261
NC_000962.3	3311972	3313066	1095	3312134	984	20.8731	1.37281	18.7911	NA_peak_262
NC_000962.3	3364147	3364444	298	3364203	763	3.58993	1.13578	2.2323	NA_peak_263
NC_000962.3	3364828	3365035	208	3364940	849	7.27541	1.20569	5.68441	NA_peak_264
NC_000962.3	3376049	3376342	294	3376304	676	3.80367	1.15093	2.42827	NA_peak_265
NC_000962.3	3377369	3377617	249	3377498	1006	49.6415	1.66078	46.6615	NA_peak_266
NC_000962.3	3378930	3379288	359	3379028	835	13.6378	1.31206	11.7975	NA_peak_267
NC_000962.3	3379817	3380073	257	3379944	925	38.8238	1.58837	36.1506	NA_peak_268
NC_000962.3	3414460	3414888	429	3414799	987	7.96145	1.20039	6.33837	NA_peak_269
NC_000962.3	3477467	3479905	2439	3478183	989	28.0589	1.4516	25.7301	NA_peak_270
NC_000962.3	3485234	3485603	370	3485362	926	13.5232	1.29197	11.6868	NA_peak_271
NC_000962.3	3487287	3487656	370	3487505	1007	17.6738	1.33006	15.6987	NA_peak_272
NC_000962.3	3487846	3488073	228	3487996	980	8.51148	1.21001	6.86254	NA_peak_273
NC_000962.3	3489648	3490293	646	3489751	930	10.8947	1.25349	9.14834	NA_peak_274
NC_000962.3	3527429	3528523	1095	3528341	828	12.8069	1.30107	10.9955	NA_peak_275
NC_000962.3	3583550	3583868	319	3583745	871	13.6015	1.30383	11.7624	NA_peak_276
NC_000962.3	3595420	3595924	505	3595729	1178	34.914	1.46742	32.3567	NA_peak_277
NC_000962.3	3629209	3629438	230	3629282	1119	8.36977	1.19288	6.72756	NA_peak_278
NC_000962.3	3658633	3658832	200	3658721	739	5.00261	1.17343	3.53807	NA_peak_279
NC_000962.3	3700455	3700853	399	3700738	715	10.5678	1.28953	8.8334	NA_peak_280
NC_000962.3	3730937	3731486	550	3731213	1851	69.1346	1.55118	65.6801	NA_peak_281
NC_000962.3	3731705	3732001	297	3731955	1510	5.41878	1.12398	3.92678	NA_peak_282
NC_000962.3	3732766	3733808	1043	3733425	1105	33.3695	1.47244	30.8589	NA_peak_283
NC_000962.3	3733936	3735611	1676	3734355	1148	49.7806	1.60514	46.7966	NA_peak_284
NC_000962.3	3738077	3738280	204	3738244	914	7.38059	1.19921	5.7846	NA_peak_285
NC_000962.3	3742294	3742554	261	3742429	1108	9.4013	1.20883	7.71237	NA_peak_286
NC_000962.3	3749879	3750232	354	3750070	950	6.85507	1.18585	5.28458	NA_peak_287
NC_000962.3	3751046	3751930	885	3751604	977	16.519	1.32175	14.5826	NA_peak_288
NC_000962.3	3752156	3752634	479	3752430	989	21.5765	1.37978	19.472	NA_peak_289
NC_000962.3	3758355	3758611	257	3758512	1055	11.3781	1.24239	9.61479	NA_peak_290
NC_000962.3	3761815	3762151	337	3761954	1061	11.373	1.24154	9.61002	NA_peak_291
NC_000962.3	3763458	3763844	387	3763559	999	5.70838	1.16044	4.19875	NA_peak_292
NC_000962.3	3765003	3765710	708	3765393	1267	42.7879	1.51108	40.001	NA_peak_293
NC_000962.3	3765919	3766467	549	3766154	1011	15.2388	1.29936	13.3445	NA_peak_294
NC_000962.3	3791028	3793346	2319	3791897	964	20.3841	1.37172	18.318	NA_peak_295
NC_000962.3	3798391	3798661	271	3798536	710	10.0077	1.28053	8.29449	NA_peak_296
NC_000962.3	3798768	3799177	410	3799027	741	13.7168	1.33636	11.8736	NA_peak_297
NC_000962.3	3802510	3802739	230	3802674	689	7.81909	1.2427	6.20229	NA_peak_298
NC_000962.3	3802798	3803009	212	3802925	711	6.17353	1.20394	4.6369	NA_peak_299
NC_000962.3	3803211	3803410	200	3803397	717	3.46183	1.13686	2.11568	NA_peak_300
NC_000962.3	3831585	3832256	672	3832227	976	6.46979	1.17634	4.91799	NA_peak_301
NC_000962.3	3834344	3834835	492	3834691	992	7.21777	1.18759	5.6297	NA_peak_302
NC_000962.3	3842319	3842674	356	3842438	836	15.3754	1.33715	13.4766	NA_peak_303
NC_000962.3	3842926	3843515	590	3843222	818	21.2684	1.42308	19.1732	NA_peak_304
NC_000962.3	3880570	3881204	635	3880849	1027	33.3553	1.49503	30.8451	NA_peak_305
NC_000962.3	3894032	3894328	297	3894259	702	4.17134	1.15763	2.76613	NA_peak_306
NC_000962.3	3902528	3902736	209	3902560	1004	6.44113	1.17311	4.89061	NA_peak_307
NC_000962.3	3902823	3903030	208	3902876	1018	6.37007	1.17056	4.8232	NA_peak_308
NC_000962.3	3907072	3907724	653	3907551	1279	37.4532	1.46472	34.8196	NA_peak_309
NC_000962.3	3927327	3928263	937	3927819	875	7.96985	1.21457	6.34638	NA_peak_310
NC_000962.3	3928527	3928975	449	3928705	984	12.3378	1.2657	10.5418	NA_peak_311
NC_000962.3	3930606	3930859	254	3930832	1043	6.84466	1.1763	5.27471	NA_peak_312
NC_000962.3	3932271	3932586	316	3932311	984	5.47159	1.15734	3.97649	NA_peak_313
NC_000962.3	3932783	3933243	461	3933049	1036	7.38813	1.18589	5.79175	NA_peak_314
NC_000962.3	3940466	3941076	611	3941024	1010	9.12693	1.21591	7.44974	NA_peak_315
NC_000962.3	3943273	3943724	452	3943494	1006	8.69211	1.20974	7.03472	NA_peak_316
NC_000962.3	3943776	3944019	244	3943992	933	4.04043	1.13221	2.64556	NA_peak_317
NC_000962.3	3944096	3944313	218	3944096	906	2.73213	1.10198	1.4616	NA_peak_318
NC_000962.3	3944594	3944862	269	3944773	1006	10.7588	1.24037	9.01751	NA_peak_319
NC_000962.3	3957021	3957277	257	3957143	737	5.30851	1.18075	3.82366	NA_peak_320
NC_000962.3	4024136	4024469	334	4024299	954	9.09227	1.22245	7.41656	NA_peak_321
NC_000962.3	4024596	4025228	633	4025062	1257	34.5103	1.44511	31.9657	NA_peak_322
NC_000962.3	4025431	4025642	212	4025513	1084	12.545	1.25391	10.7421	NA_peak_323
NC_000962.3	4036983	4037335	353	4037158	985	10.4451	1.23873	8.71529	NA_peak_324
NC_000962.3	4040464	4040929	466	4040530	1143	5.19513	1.14017	3.71749	NA_peak_325
NC_000962.3	4041271	4041558	288	4041363	1112	12.6928	1.25207	10.8851	NA_peak_326
NC_000962.3	4054362	4054894	533	4054695	1030	25.9235	1.41772	23.6747	NA_peak_327
NC_000962.3	4055280	4057299	2020	4056245	1003	19.1445	1.34838	17.1197	NA_peak_328
NC_000962.3	4099012	4099490	479	4099329	1188	33.1877	1.44953	30.6823	NA_peak_329
NC_000962.3	4100481	4101114	634	4100847	1367	88.2695	1.80775	84.2742	NA_peak_330
NC_000962.3	4119043	4119544	502	4119408	1048	15.8939	1.30108	13.9778	NA_peak_331
NC_000962.3	4124232	4124502	271	4124395	1134	16.0207	1.28888	14.1007	NA_peak_332
NC_000962.3	4130546	4130897	352	4130688	763	7.19727	1.2169	5.61019	NA_peak_333
NC_000962.3	4149049	4149405	357	4149241	1107	18.7221	1.32365	16.7117	NA_peak_334
NC_000962.3	4168070	4168696	627	4168388	1178	21.2888	1.33856	19.1932	NA_peak_335
NC_000962.3	4224703	4225248	546	4225016	1061	14.8021	1.28563	12.9224	NA_peak_336
NC_000962.3	4263069	4263555	487	4263196	1243	21.5094	1.32998	19.4072	NA_peak_337
NC_000962.3	4265767	4266178	412	4265797	1165	3.50248	1.10646	2.15285	NA_peak_338
NC_000962.3	4266645	4266845	201	4266812	1048	2.85928	1.0976	1.57398	NA_peak_339
NC_000962.3	4286814	4287617	804	4287591	962	5.0177	1.15043	3.55154	NA_peak_340
NC_000962.3	4287790	4288167	378	4287999	1085	13.843	1.27015	11.9959	NA_peak_341
NC_000962.3	4288504	4289146	643	4288752	1246	34.6698	1.44895	32.1206	NA_peak_342
NC_000962.3	4290518	4290940	423	4290689	1281	15.7067	1.26568	13.7973	NA_peak_343
NC_000962.3	4291437	4292392	956	4291700	1233	19.3288	1.30976	17.2976	NA_peak_344
NC_000962.3	4298240	4298573	334	4298382	1052	5.44969	1.1513	3.95598	NA_peak_345
NC_000962.3	4299330	4301067	1738	4299429	1236	21.4181	1.3302	19.3188	NA_peak_346
NC_000962.3	4305871	4306953	1083	4306588	1230	23.792	1.35422	21.6163	NA_peak_347
NC_000962.3	4313863	4314340	478	4314183	1298	21.0293	1.31696	18.9418	NA_peak_348
NC_000962.3	4320320	4320638	319	4320482	815	20.4618	1.41328	18.3928	NA_peak_349
NC_000962.3	4321341	4321644	304	4321473	725	8.83269	1.25537	7.16875	NA_peak_350
NC_000962.3	4323982	4324182	201	4324099	902	8.90499	1.22659	7.23764	NA_peak_351
NC_000962.3	4336890	4337133	244	4337033	868	7.14727	1.20082	5.56261	NA_peak_352
NC_000962.3	4340024	4340700	677	4340267	1040	23.2779	1.38693	21.1184	NA_peak_353
NC_000962.3	4340846	4341102	257	4341012	1042	18.2947	1.33064	16.2986	NA_peak_354
NC_000962.3	4341343	4341589	247	4341476	858	5.29376	1.16593	3.8097	NA_peak_355
NC_000962.3	4350480	4350802	323	4350624	1156	15.9845	1.28523	14.0656	NA_peak_356
NC_000962.3	4352560	4352890	331	4352742	1185	11.1692	1.2242	9.4132	NA_peak_357
NC_000962.3	4358737	4359140	404	4358885	1247	20.0901	1.31534	18.0335	NA_peak_358
NC_000962.3	4359316	4359645	330	4359490	1250	9.84882	1.20096	8.14197	NA_peak_359
NC_000962.3	4360137	4360336	200	4360196	1220	4.59254	1.12476	3.15637	NA_peak_360
NC_000962.3	4360682	4360954	273	4360732	1075	3.6797	1.11496	2.31466	NA_peak_361
NC_000962.3	4371114	4371313	200	4371263	826	3.54937	1.12908	2.19538	NA_peak_362
NC_000962.3	4371427	4371939	513	4371690	1177	38.7873	1.5018	36.1153	NA_peak_363
NC_000962.3	4372357	4372907	551	4372711	1193	29.0378	1.41064	26.6726	NA_peak_364
NC_000962.3	4374128	4374432	305	4374202	870	6.17154	1.18222	4.63506	NA_peak_365
NC_000962.3	4385835	4386439	605	4386014	1197	26.3626	1.3848	24.0978	NA_peak_366
NC_000962.3	4387074	4388772	1699	4388324	1141	30.711	1.43809	28.2875	NA_peak_367
NC_000962.3	4393001	4393534	534	4393147	1109	18.3585	1.31927	16.3603	NA_peak_368
NC_000962.3	4411082	4411327	246	4411234	1247	14.8263	1.26025	12.9457	NA_peak_369

## Sheet: glucose;FC>1.5; qvalue<0.0001 (
Replicate 1											Replicate 2
Rv_name	Name	fold_enrichment		peak_start	peak_end	gene_start	gene_stop	strand	q-value		Rv_name	Name	fold_enrichment		peak_start	peak_end	gene_start	gene_stop	strand	q-value
Rv1535	Rv1535	2.28311	214.987	1735353	1736696	1735975	1736212	+	1.03148e-215		Rv1535	Rv1535	2.63575	287.322	1735355	1736705	1735975	1736212	+	4.7631e-288
Rv1536	ileS	2.28311	214.987	1735353	1736696	1736518	1739644	+	1.03148e-215		Rv1536	ileS	2.63575	287.322	1735355	1736705	1736518	1739644	+	4.7631e-288
RVnc0036a	MTS2823	2.08288	196.274	4100492	4101271	4100668	4100968	+	5.3168e-197		RVnc0036a	MTS2823	2.4095	274.165	4100485	4101311	4100668	4100968	+	6.83754e-275
Rv3612c	Rv3612c	2.00121	239.145	4053817	4057615	4053517	4053847	-	7.16886e-240		Rv3612c	Rv3612c	2.25166	313.545	4053806	4057589	4053517	4053847	-	0
Rv3613c	Rv3613c	2.00121	239.145	4053817	4057615	4053880	4054042	-	7.16886e-240		Rv3613c	Rv3613c	2.25166	313.545	4053806	4057589	4053880	4054042	-	0
Rv3614c	espD	2.00121	239.145	4053817	4057615	4054141	4054696	-	7.16886e-240		Rv3614c	espD	2.25166	313.545	4053806	4057589	4054141	4054696	-	0
Rv3615c	espC	2.00121	239.145	4053817	4057615	4054811	4055123	-	7.16886e-240		Rv3615c	espC	2.25166	313.545	4053806	4057589	4054811	4055123	-	0
Rv3616c	espA	2.00121	239.145	4053817	4057615	4055196	4056375	-	7.16886e-240		Rv3616c	espA	2.25166	313.545	4053806	4057589	4055196	4056375	-	0
Rv3617	ephA	2.00121	239.145	4053817	4057615	4057732	4058701	+	7.16886e-240		Rv3617	ephA	2.25166	313.545	4053806	4057589	4057732	4058701	+	0
RVnc0021	mcr3	1.91929	184.06	1471442	1477674	1471618	1471742	+	8.70783e-185		RVnc0021	mcr3	2.01728	193.586	1471478	1477494	1471618	1471742	+	2.59525e-194
Rvnr01	rrs	1.91929	184.06	1471442	1477674	1471845	1473382	+	8.70783e-185		Rvnr01	rrs	2.01728	193.586	1471478	1477494	1471845	1473382	+	2.59525e-194
Rvnr02	rrl	1.91929	184.06	1471442	1477674	1473657	1476795	+	8.70783e-185		Rvnr02	rrl	2.01728	193.586	1471478	1477494	1473657	1476795	+	2.59525e-194
Rvnr03	rrf	1.91929	184.06	1471442	1477674	1476898	1477013	+	8.70783e-185		Rvnr03	rrf	2.01728	193.586	1471478	1477494	1476898	1477013	+	2.59525e-194
Rv2337c	Rv2337c	1.80305	134.568	2612867	2614460	2611868	2612987	-	2.70222e-135		Rv1918c	PPE35	1.87025	66.8161	2170574	2171192	2167648	2170612	-	1.52714e-67
Rv2338c	moeW	1.80305	134.568	2612867	2614460	2613106	2614063	-	2.70222e-135		Rv1920	Rv1920	1.87025	66.8161	2170574	2171192	2171622	2172486	+	1.52714e-67
Rv2339	mmpL9	1.80305	134.568	2612867	2614460	2614692	2617581	+	2.70222e-135		RVnc0024	mcr7	1.83301	127.502	2691999	2692917	2692171	2692521	+	3.14884e-128
RVnc0024	mcr7	1.75295	121.777	2691965	2692889	2692171	2692521	+	1.67171e-122		Rv2395A	aprA	1.83301	127.502	2691999	2692917	2692223	2692439	+	3.14884e-128
Rv2395A	aprA	1.75295	121.777	2691965	2692889	2692223	2692439	+	1.67171e-122		Rv2395B	aprB	1.83301	127.502	2691999	2692917	2692550	2692715	+	3.14884e-128
Rv2395B	aprB	1.75295	121.777	2691965	2692889	2692550	2692715	+	1.67171e-122		Rv2396	PE_PGRS41	1.83301	127.502	2691999	2692917	2692798	2693884	+	3.14884e-128
Rv2396	PE_PGRS41	1.75295	121.777	2691965	2692889	2692798	2693884	+	1.67171e-122		Rv3678A	Rv3678A	1.78729	88.751	4119081	4119726	4118529	4118691	-	1.77431e-89
Rv3487c	lipF	1.73345	101.827	3907012	3907702	3906173	3907007	-	1.48772e-102		Rv3680	Rv3680	1.78729	88.751	4119081	4119726	4119794	4120955	+	1.77431e-89
Rv3488	Rv3488	1.73345	101.827	3907012	3907702	3907666	3907990	+	1.48772e-102		Rv3017c	esxQ	1.78425	61.7787	3377339	3377658	3376489	3376852	-	1.66441e-62
Rv3489	Rv3489	1.73345	101.827	3907012	3907702	3908071	3908236	+	1.48772e-102		Rv2337c	Rv2337c	1.76446	106.001	2612999	2615778	2611868	2612987	-	9.98688e-107
Rv3678A	Rv3678A	1.7271	87.9087	4119086	4119701	4118529	4118691	-	1.23384e-88		Rv2338c	moeW	1.76446	106.001	2612999	2615778	2613106	2614063	-	9.98688e-107
Rv3680	Rv3680	1.7271	87.9087	4119086	4119701	4119794	4120955	+	1.23384e-88		Rv2339	mmpL9	1.76446	106.001	2612999	2615778	2614692	2617581	+	9.98688e-107
Rv1918c	PPE35	1.7113	56.4721	2170577	2171159	2167648	2170612	-	3.37241e-57		Rv1505c	Rv1505c	1.74737	81.7951	1694850	1697834	1695280	1695946	-	1.60273e-82
Rv1920	Rv1920	1.7113	56.4721	2170577	2171159	2171622	2172486	+	3.37241e-57		Rv1506c	Rv1506c	1.74737	81.7951	1694850	1697834	1695942	1696443	-	1.60273e-82
Rv3901c	Rv3901c	1.68581	76.9585	4387113	4388478	4386364	4386814	-	1.10025e-77		Rv1507c	Rv1507c	1.74737	81.7951	1694850	1697834	1696726	1697422	-	1.60273e-82
Rv3902c	Rv3902c	1.68581	76.9585	4387113	4388478	4387364	4387895	-	1.10025e-77		Rv1507A	Rv1507A	1.74737	81.7951	1694850	1697834	1697355	1697859	+	1.60273e-82
Rv1088	PE9	1.67245	76.4088	1214203	1214694	1214512	1214947	+	3.90104e-77		Rv3487c	lipF	1.73766	88.2177	3906970	3907731	3906173	3907007	-	6.05717e-89
Rv3621c	PPE65	1.65902	64.0717	4062130	4062568	4060647	4061889	-	8.47813e-65		Rv3488	Rv3488	1.73766	88.2177	3906970	3907731	3907666	3907990	+	6.05717e-89
Rv3622c	PE32	1.65902	64.0717	4062130	4062568	4061898	4062198	-	8.47813e-65		Rv3489	Rv3489	1.73766	88.2177	3906970	3907731	3908071	3908236	+	6.05717e-89
Rv3623	lpqG	1.65902	64.0717	4062130	4062568	4062526	4063249	+	8.47813e-65		Rv2958c	Rv2958c	1.73329	63.1949	3311785	3313124	3310713	3312000	-	6.38337e-64
Rv2958c	Rv2958c	1.6514	60.617	3311858	3313031	3310713	3312000	-	2.41552e-61		Rv2959c	Rv2959c	1.73329	63.1949	3311785	3313124	3312100	3312838	-	6.38337e-64
Rv2959c	Rv2959c	1.6514	60.617	3311858	3313031	3312100	3312838	-	2.41552e-61		Rv2961	Rv2961	1.73329	63.1949	3311785	3313124	3313282	3313672	+	6.38337e-64
Rv2961	Rv2961	1.6514	60.617	3311858	3313031	3313282	3313672	+	2.41552e-61		Rv0508	Rv0508	1.71265	83.0125	598375	599881	600097	600391	+	9.7174e-84
Rv3383c	idsB	1.61908	37.2025	3798358	3799179	3797436	3798489	-	6.27365e-38		Rv2307c	Rv2307c	1.7003	53.3861	2579174	2580087	2577850	2578696	-	4.11017e-54
Rv2307c	Rv2307c	1.61777	48.7648	2579146	2580033	2577850	2578696	-	1.71858e-49		Rv2307A	Rv2307A	1.7003	53.3861	2579174	2580087	2579227	2579419	-	4.11017e-54
Rv2307A	Rv2307A	1.61777	48.7648	2579146	2580033	2579227	2579419	-	1.71858e-49		Rv2307B	Rv2307B	1.7003	53.3861	2579174	2580087	2579503	2579935	-	4.11017e-54
Rv2307B	Rv2307B	1.61777	48.7648	2579146	2580033	2579503	2579935	-	1.71858e-49		Rv2308	Rv2308	1.7003	53.3861	2579174	2580087	2580418	2581135	+	4.11017e-54
Rv2308	Rv2308	1.61777	48.7648	2579146	2580033	2580418	2581135	+	1.71858e-49		Rv1501	Rv1501	1.69736	83.526	1691026	1694707	1691889	1692711	+	2.97831e-84
Rv3017c	esxQ	1.60528	45.7075	3377351	3377662	3376489	3376852	-	1.96101e-46		Rv1502	Rv1502	1.69736	83.526	1691026	1694707	1692923	1693823	+	2.97831e-84
Rv1501	Rv1501	1.58129	74.4554	1690851	1697773	1691889	1692711	+	3.50421e-75		Rv0032	bioF2	1.65575	45.987	33738	34386	34294	36610	+	1.03048e-46
Rv1502	Rv1502	1.58129	74.4554	1690851	1697773	1692923	1693823	+	3.50421e-75		Rv3901c	Rv3901c	1.65286	61.6598	4387111	4388493	4386364	4386814	-	2.18887e-62
Rv1505c	Rv1505c	1.58129	74.4554	1690851	1697773	1695280	1695946	-	3.50421e-75		Rv3902c	Rv3902c	1.65286	61.6598	4387111	4388493	4387364	4387895	-	2.18887e-62
Rv1506c	Rv1506c	1.58129	74.4554	1690851	1697773	1695942	1696443	-	3.50421e-75		Rv3825c	pks2	1.64896	56.6921	4299340	4301175	4293224	4299605	-	2.0317e-57
Rv1507c	Rv1507c	1.58129	74.4554	1690851	1697773	1696726	1697422	-	3.50421e-75		Rv3826	fadD23	1.64896	56.6921	4299340	4301175	4299811	4301566	+	2.0317e-57
Rv1507A	Rv1507A	1.58129	74.4554	1690851	1697773	1697355	1697859	+	3.50421e-75		Rv1116	Rv1116	1.6361	52.933	1240745	1241146	1241002	1241188	+	1.16676e-53
Rv2107	PE22	1.56839	38.6274	2366800	2367836	2367358	2367655	+	2.35836e-39		Rv1117	Rv1117	1.6361	52.933	1240745	1241146	1241632	1241956	+	1.16676e-53
Rv2108	PPE36	1.56839	38.6274	2366800	2367836	2367710	2368442	+	2.35836e-39		Rv0450c	mmpL4	1.62997	70.9911	540440	542232	538587	541491	-	1.02082e-71
Rv0402c	mmpL1	1.5639	72.923	483613	487130	480354	483231	-	1.19407e-73		Rv0451c	mmpS4	1.62997	70.9911	540440	542232	541487	541910	-	1.02082e-71
Rv0403c	mmpS1	1.5639	72.923	483613	487130	483227	483656	-	1.19407e-73		Rv0452	Rv0452	1.62997	70.9911	540440	542232	542141	542852	+	1.02082e-71
Rv0404	fadD30	1.5639	72.923	483613	487130	483976	485734	+	1.19407e-73		Rv1088	PE9	1.62286	60.6605	1214200	1214608	1214512	1214947	+	2.18534e-61
Rv0405	pks6	1.5639	72.923	483613	487130	485730	489939	+	1.19407e-73		Rv2107	PE22	1.60411	33.6538	2366817	2367859	2367358	2367655	+	2.21927e-34
Rv0032	bioF2	1.56159	40.3558	33726	34427	34294	36610	+	4.40707e-41		Rv2108	PPE36	1.60411	33.6538	2366817	2367859	2367710	2368442	+	2.21927e-34
Rv1396c	PE_PGRS25	1.56065	35.1774	1573744	1574208	1572126	1573857	-	6.64599e-36		Rv0985c	mscL	1.59923	76.7512	1101784	1106487	1101024	1101480	-	1.77329e-77
Rv0508	Rv0508	1.5453	65.807	598322	599935	600097	600391	+	1.55973e-66		Rv0986	Rv0986	1.59923	76.7512	1101784	1106487	1101802	1102549	+	1.77329e-77
Rv3825c	pks2	1.54472	48.556	4299354	4301265	4293224	4299605	-	2.77978e-49		Rv0987	Rv0987	1.59923	76.7512	1101784	1106487	1102541	1105109	+	1.77329e-77
Rv3826	fadD23	1.54472	48.556	4299354	4301265	4299811	4301566	+	2.77978e-49		Rv0988	Rv0988	1.59923	76.7512	1101784	1106487	1105115	1106276	+	1.77329e-77
Rv0450c	mmpL4	1.53965	65.845	538826	542251	538587	541491	-	1.42883e-66		Rv0667	rpoB	1.5888	40.121	759341	759870	759806	763325	+	7.56868e-41
Rv0451c	mmpS4	1.53965	65.845	538826	542251	541487	541910	-	1.42883e-66		Rv3621c	PPE65	1.56192	40.919	4062160	4062572	4060647	4061889	-	1.2049e-41
Rv0452	Rv0452	1.53965	65.845	538826	542251	542141	542852	+	1.42883e-66		Rv3622c	PE32	1.56192	40.919	4062160	4062572	4061898	4062198	-	1.2049e-41
Rv0985c	mscL	1.53062	75.2956	1101774	1106537	1101024	1101480	-	5.06256e-76		Rv3623	lpqG	1.56192	40.919	4062160	4062572	4062526	4063249	+	1.2049e-41
Rv0986	Rv0986	1.53062	75.2956	1101774	1106537	1101802	1102549	+	5.06256e-76		Rv3479	Rv3479	1.55938	64.5235	3895352	3896065	3895819	3898885	+	2.99571e-65
Rv0987	Rv0987	1.53062	75.2956	1101774	1106537	1102541	1105109	+	5.06256e-76		Rv1396c	PE_PGRS25	1.53002	23.4944	1574319	1574805	1572126	1573857	-	3.20369e-24
Rv0988	Rv0988	1.53062	75.2956	1101774	1106537	1105115	1106276	+	5.06256e-76		Rv3383c	idsB	1.53002	23.4944	3798356	3799194	3797436	3798489	-	3.20369e-24
Rv3479	Rv3479	1.52685	64.4361	3895357	3896051	3895819	3898885	+	3.66353e-65		Rv0402c	mmpL1	1.52747	57.8174	483621	487174	480354	483231	-	1.52268e-58
Rv1116	Rv1116	1.51129	42.8276	1240741	1241184	1241002	1241188	+	1.4873e-43		Rv0403c	mmpS1	1.52747	57.8174	483621	487174	483227	483656	-	1.52268e-58
Rv1117	Rv1117	1.51129	42.8276	1240741	1241184	1241632	1241956	+	1.4873e-43		Rv0404	fadD30	1.52747	57.8174	483621	487174	483976	485734	+	1.52268e-58
Rv0667	rpoB	1.51118	34.2281	759350	759831	759806	763325	+	5.91425e-35		Rv0405	pks6	1.52747	57.8174	483621	487174	485730	489939	+	1.52268e-58

## Sheet: propiona;FC>1.5,qvalue<0.0001 (
Rv_name	Name	fold_enrichment		peak_start	peak_end	gene_start	gene_stop	strand	qvalue		Rv_name	Name	fold_enrichment		peak_start	peak_end	gene_start	gene_stop	strand	qvalue
RVnc0036a	MTS2823	1.85759	78.3172	4100507	4101157	4100668	4100968	+	4.81693e-79		Rv1129c	Rv1129c	1.84581	107.472	1254467	1257524	1253073	1254534	-	3.37179e-108
RVnc0021	mcr3	1.79529	75.9926	1471503	1477394	1471618	1471742	+	1.01714e-76		Rv1130	prpD	1.84581	107.472	1254467	1257524	1254554	1256135	+	3.37179e-108
Rvnr01	rrs	1.79529	75.9926	1471503	1477394	1471845	1473382	+	1.01714e-76		Rv1131	prpC	1.84581	107.472	1254467	1257524	1256131	1257313	+	3.37179e-108
Rvnr02	rrl	1.79529	75.9926	1471503	1477394	1473657	1476795	+	1.01714e-76		Rv1132	Rv1132	1.84581	107.472	1254467	1257524	1257324	1259055	+	3.37179e-108
Rvnr03	rrf	1.79529	75.9926	1471503	1477394	1476898	1477013	+	1.01714e-76		RVnc0021	mcr3	1.81424	95.7105	1471517	1477571	1471618	1471742	+	1.94765e-96
Rv1535	Rv1535	1.74136	49.89	1735373	1736484	1735975	1736212	+	1.28828e-50		Rvnr01	rrs	1.81424	95.7105	1471517	1477571	1471845	1473382	+	1.94765e-96
Rv1536	ileS	1.74136	49.89	1735373	1736484	1736518	1739644	+	1.28828e-50		Rvnr02	rrl	1.81424	95.7105	1471517	1477571	1473657	1476795	+	1.94765e-96
Rv1129c	Rv1129c	1.68091	68.8255	1254431	1257605	1253073	1254534	-	1.49438e-69		Rvnr03	rrf	1.81424	95.7105	1471517	1477571	1476898	1477013	+	1.94765e-96
Rv1130	prpD	1.68091	68.8255	1254431	1257605	1254554	1256135	+	1.49438e-69		RVnc0036a	MTS2823	1.80775	84.2742	4100481	4101114	4100668	4100968	+	5.31839e-85
Rv1131	prpC	1.68091	68.8255	1254431	1257605	1256131	1257313	+	1.49438e-69		Rv1535	Rv1535	1.76525	61.2371	1735363	1736524	1735975	1736212	+	5.79335e-62
Rv1132	Rv1132	1.68091	68.8255	1254431	1257605	1257324	1259055	+	1.49438e-69		Rv1536	ileS	1.76525	61.2371	1735363	1736524	1736518	1739644	+	5.79335e-62
RVnc0024	mcr7	1.64842	55.1488	2692009	2692913	2692171	2692521	+	7.09872e-56		RVnc0024	mcr7	1.64298	65.6321	2691994	2692817	2692171	2692521	+	2.33265e-66
Rv2395A	aprA	1.64842	55.1488	2692009	2692913	2692223	2692439	+	7.09872e-56		Rv2395A	aprA	1.64298	65.6321	2691994	2692817	2692223	2692439	+	2.33265e-66
Rv2395B	aprB	1.64842	55.1488	2692009	2692913	2692550	2692715	+	7.09872e-56		Rv2395B	aprB	1.64298	65.6321	2691994	2692817	2692550	2692715	+	2.33265e-66
Rv2396	PE_PGRS41	1.64842	55.1488	2692009	2692913	2692798	2693884	+	7.09872e-56		Rv2396	PE_PGRS41	1.64298	65.6321	2691994	2692817	2692798	2693884	+	2.33265e-66
Rv0985c	mscL	1.6086	44.1651	1101742	1106460	1101024	1101480	-	6.83754e-45		Rv2339	mmpL9	1.61752	54.3892	2612835	2614538	2614692	2617581	+	4.0815e-55
Rv0986	Rv0986	1.6086	44.1651	1101742	1106460	1101802	1102549	+	6.83754e-45		Rv2337c	Rv2337c	1.61752	54.3892	2612835	2614538	2611868	2612987	-	4.0815e-55
Rv0987	Rv0987	1.6086	44.1651	1101742	1106460	1102541	1105109	+	6.83754e-45		Rv2338c	moeW	1.61752	54.3892	2612835	2614538	2613106	2614063	-	4.0815e-55
Rv0988	Rv0988	1.6086	44.1651	1101742	1106460	1105115	1106276	+	6.83754e-45		Rv1498A	Rv1498A	1.55586	43.2049	1690789	1694662	1690133	1690346	-	6.23821e-44
Rv2339	mmpL9	1.60473	44.5618	2613010	2614478	2614692	2617581	+	2.74265e-45		Rv1500	Rv1500	1.55586	43.2049	1690789	1694662	1690849	1691878	+	6.23821e-44
Rv2337c	Rv2337c	1.60473	44.5618	2613010	2614478	2611868	2612987	-	2.74265e-45		Rv1501	Rv1501	1.55586	43.2049	1690789	1694662	1691889	1692711	+	6.23821e-44
Rv2338c	moeW	1.60473	44.5618	2613010	2614478	2613106	2614063	-	2.74265e-45		Rv1502	Rv1502	1.55586	43.2049	1690789	1694662	1692923	1693823	+	6.23821e-44
Rv0468	fadB2	1.58491	62.1897	557155	558617	558894	559755	+	6.46145e-63		Rv1505c	Rv1505c	1.51873	34.4196	1694935	1697859	1695280	1695946	-	3.80557e-35
Rv0467	icl1	1.58491	62.1897	557155	558617	557526	558813	+	6.46145e-63		Rv1506c	Rv1506c	1.51873	34.4196	1694935	1697859	1695942	1696443	-	3.80557e-35
Rv1505c	Rv1505c	1.5534	33.4455	1695044	1697851	1695280	1695946	-	3.58468e-34		Rv1507c	Rv1507c	1.51873	34.4196	1694935	1697859	1696726	1697422	-	3.80557e-35
Rv1506c	Rv1506c	1.5534	33.4455	1695044	1697851	1695942	1696443	-	3.58468e-34		Rv1507A	Rv1507A	1.51873	34.4196	1694935	1697859	1697355	1697859	+	3.80557e-35
Rv1507c	Rv1507c	1.5534	33.4455	1695044	1697851	1696726	1697422	-	3.58468e-34		Rv0467	icl1	1.50987	63.0044	557288	559305	557526	558813	+	9.89943e-64
Rv1507A	Rv1507A	1.5534	33.4455	1695044	1697851	1697355	1697859	+	3.58468e-34		Rv0468	fadB2	1.50987	63.0044	557288	559305	558894	559755	+	9.89943e-64
Rv1498A	Rv1498A	1.55002	35.0095	1690793	1694662	1690133	1690346	-	9.78273e-36		Rv0985c	mscL	1.50037	40.2737	1101769	1106529	1101024	1101480	-	5.32476e-41
Rv1500	Rv1500	1.55002	35.0095	1690793	1694662	1690849	1691878	+	9.78273e-36		Rv0986	Rv0986	1.50037	40.2737	1101769	1106529	1101802	1102549	+	5.32476e-41
Rv1501	Rv1501	1.55002	35.0095	1690793	1694662	1691889	1692711	+	9.78273e-36		Rv0987	Rv0987	1.50037	40.2737	1101769	1106529	1102541	1105109	+	5.32476e-41
Rv1502	Rv1502	1.55002	35.0095	1690793	1694662	1692923	1693823	+	9.78273e-36		Rv0988	Rv0988	1.50037	40.2737	1101769	1106529	1105115	1106276	+	5.32476e-41
