# Supplementary material for: Biosensor-integrated transposon mutagenesis reveals rv0158 as a coordinator of redox homeostasis in Mycobacterium tuberculosis
Source: eLife. 2023 Aug 29;12:e80218. doi: 10.7554/eLife.80218 (PMC10501769; doi:10.7554/eLife.80218)
Supplement: Supplementary file 6. — The distance between the Rv0158 motif and motifs of other TFs is also indicated. [file elife-80218-supp6.xlsx]

## Sheet: out_relative_pos_motifs
gene_name	motif(comparison_motif)	number_of_Rv0158_motif	number_of_comparison_motif	(relative_position_of_comparison_motif_wrt_gene, relative_position_of_Rv0158_motif_wrt_gene, distance between comparison motif and Rv0158 motif) Units : nucleotides This column contains positions of all combinations of motifs location (example: in case of 2 RamB motifs and 3 Rv0158 motifs, there will be 2*3=6 combinations of distances)	minimum distance between two motifs
Rv0467	RamB	2	2	-179,-73,106|-179,-231,-52|-183,-73,110|-183,-231,-48	48
Rv1130	RamB	3	2	-14,-475,-461|-14,-308,-294|-18,-475,-457|-18,-308,-290|-9,-475,-466|-9,-308,-299	290
Rv1129c	RamB	3	2	-17,-374,-357|-17,-395,-378|-13,-374,-361|-13,-395,-382|-22,-374,-352|-22,-395,-373	352
Rv2395B	phoP	2	1	-446,-111,335|-457,-111,346	335
Rv2395A	phoP	2	1	-119,-200,-81|-130,-200,-70	70
RVnc0024	phoP	2	1	-67,-148,-81|-78,-148,-70	70
Rv3621c	phoP	2	4	-411,-109,302|-411,-43,368|-411,-82,329|-411,-274,137|-433,-109,324|-433,-43,390|-433,-82,351|-433,-274,159	137
Rv3623	phoP	2	1	-245,-376,-131|-223,-376,-153	131
Rv3622c	phoP	2	2	-102,-382,-280|-102,-379,-277|-124,-382,-258|-124,-379,-255	255
Rvnr01	RamB	1	1	24,-377,-383	383
RVnc0036a	RamB	1	4	-35,-219,-184|-35,-210,-175|-35,-240,-205|-35,-94,-59	59
Rv0508	glnR	1	3	-306,-310,-4|-306,-129,177|-306,-425,-119	4
Rv3826	phoP	2	3	-176,-400,-224|-176,-392,-216|-176,-224,-48|-165,-400,-235|-165,-392,-227|-165,-224,-59	48
Rv3825c	phoP	2	1	-49,-5,54|-60,-5,65	54
Rv0467	prpR	3	2	-174,-73,101|-174,-231,-57|-174,-73,101|-174,-231,-57|-183,-73,110|-183,-231,-48	48
Rv1129c	prpR	3	2	-17,-374,-357|-17,-395,-378|-17,-374,-357|-17,-395,-378|-8,-374,-366|-8,-395,-387	357
Rv1130	prpR	3	2	-9,-475,-466|-9,-308,-299|-9,-475,-466|-9,-308,-299|-18,-475,-457|-18,-308,-290	290
Rv0508	prpR	1	3	-235,-310,-75|-235,-129,106|-235,-425,-190	75
Rv3479	glnR	1	6	-439,-387,52|-439,-348,91|-439,-388,51|-439,-396,43|-439,-137,302|-439,-381,58	43
RVnc0021	glnR	1	1	-306,-150,156	156
Rv1918c	phoP	1	2	-457,-476,-19|-457,-228,229	19
Rv3017c	RamB	1	19	27,-387,-390|27,-318,-321|27,-327,-330|27,-324,-327|27,-116,-119|27,-207,-210|27,-444,-447|27,-411,-414|27,-122,-125|27,-363,-366|27,-315,-318|27,-396,-399|27,-291,-294|27,-219,-222|27,-390,-393|27,-288,-291|27,-345,-348|27,-159,-162|27,-417,-420	119
Rv2108	phoP	1	1	-401,-260,141	141
Rv1116	prpR	1	10	-155,-290,-135|-155,-223,-68|-155,-447,-292|-155,-217,-62|-155,-450,-295|-155,-368,-213|-155,-471,-316|-155,-220,-65|-155,-208,-53|-155,-209,-54	53
Rv3615c	glnR	1	5	-258,-422,-164|-258,-415,-157|-258,-431,-173|-258,-121,137|-258,-235,23	23
Rv3902c	glnR	2	1	25,-95,-100|-343,-95,248	100
Rv1507c	glnR	1	1	-445,-311,134	134
Rv0986	phoP	1	1	-431,-385,46	46
Rv1920	glnR	1	6	-470,-487,-17|-470,-266,204|-470,-496,-26|-470,-478,-8|-470,-484,-14|-470,-493,-23	8
Rv1396c	prpR	1	1	17,-285,-298	298
Motifs taken
Motif name	Reference
PhoP	https://pubmed.ncbi.nlm.nih.gov/24874799/
PrpR	https://journals.plos.org/plosone/article?id=10.1371/journal.pone.0043651
GlnR	https://www.ncbi.nlm.nih.gov/pmc/articles/PMC7886694/ , https://bmcgenomics.biomedcentral.com/articles/10.1186/1471-2164-14-301
RamB	https://www.ncbi.nlm.nih.gov/pmc/articles/PMC2786550/
