# Supplementary material for: Biosensor-integrated transposon mutagenesis reveals rv0158 as a coordinator of redox homeostasis in Mycobacterium tuberculosis
Source: eLife. 2023 Aug 29;12:e80218. doi: 10.7554/eLife.80218 (PMC10501769; doi:10.7554/eLife.80218)
Supplement: Supplementary file 7. [file elife-80218-supp7.xlsx]

## Sheet: Sheet1
Transposon mutants of Mtb CDC 1551 were collected from BEI Resources used in this study.
		Strain	BEI Item no.
	1	M. tuberculosis CDC1551 Tn Mutant 2118 (MT3556, Rv3450c)	NR-15159
	2	M. tuberculosis CDC1551 Tn Mutant 1700 (MT3981, Rv3868)	NR-18197
	3	M. tuberculosis CDC1551 Tn Mutant 23 (MT2940, Rv2873)	NR-14715
	4	M. tuberculosis CDC1551 Tn Mutant 180 (MT1824, Rv1774)	NR-14891
	5	M. tuberculosis CDC1551 Tn Mutant 102 (MT2330.1, Rv2268c)	NR-14773
	6	M. tuberculosis CDC1551 Tn Mutant 2531 (MT1041, Rv1013)	NR-18551
	7	M. tuberculosis CDC1551 Tn Mutant 384 (MT1540, Rv1493)	NR-14972
	8	M. tuberculosis CDC1551 Tn Mutant 2511 (MT1840, Rv1791)	NR-18544
	9	M. tuberculosis CDC1551 Tn Mutant 1286 (MT3976, Rv3862c)	NR-15060
	10	M. tuberculosis CDC1551 Tn Mutant 2728 (MT2231, Rv2175c)	NR-18633
	11	M. tuberculosis CDC1551 Tn Mutant 521 (MT1073, Rv1043c)	NR-14768
	12	M. tuberculosis CDC1551	NR-13649
