# Supplementary material for: Biosensor-integrated transposon mutagenesis reveals rv0158 as a coordinator of redox homeostasis in Mycobacterium tuberculosis
Source: eLife. 2023 Aug 29;12:e80218. doi: 10.7554/eLife.80218 (PMC10501769; doi:10.7554/eLife.80218)
Supplement: Supplementary file 8. [file elife-80218-supp8.xlsx]

## Sheet: Sheet1
Primers used in this study.
			Primer name
	1	ahpC RT F	ACCATTGGCGATCAATTCCC
	2	ahpC RT R	AGAACACCACCCGCCACTTG
	3	alkA RT F	TCGGTGGGCGGGTGTAATTG
	4	alkA RT R	AAACCGCGACGACGAACCAG
	5	sigH RT F	AGGAGACAGACGAGGAGTTG
	6	sigH RT R	TAGGCCTTCACCATCGTCTC
	7	sufR RT F	GCGCCGTATCGACGCCATCC
	8	sufR RT R	GCTTTGCTGAGCGCCGTTGC
	9	16S rRNA RT F	GCCGTAAACGGTGGGTACTA
	10	16S rRNA RT R	TGCATGTCAAACCCAGGTAA
	11	rv0081 RT F	CTGGAGTCGTCGAACCTGTC
	12	rv0081 RT R	CGGGTGCGGCAATCGAATAG
	13	rv0077c RT F	TCCTCAAACCGGTGATCCTG
	14	rv0077c RT R	GTGCGACAAACCGGCATACG
	15	rv0082 RT F	GGAGATTTCGGGCGCCTTTG
	16	rv0082 RT R	CCGGTCACCAACAACGCATC
	17	groEL2 RT F	CCTGGTCGTCAACAAGATCC
	18	groEL2 RT R	TGGCCATATCCTGCAGCATC
	19	icl1 RT F	AGTTGGCCTCTGAGAAGAAG
	20	icl1 RT R	GTGGGAACATCAGCCACATC
	21	groES RT F	CTGACACCGCCAAGGAGAAG
	22	groES RT R	GCCGTACTTGCTGTAGATGAC
	23	rv0823 RT F	AGTGCCCAAAGTCACCAAGC
	24	rv0823 RT R	CCGGTATATCGGTGCCTTCG
	25	desA1 RT F	ACCACCAGGGCCACTATTTC
	26	desA1 RT F	TACATGCCTTGCCGGTATTG
	27	prpD RT F	ACTCGCTGCCCTACATCTTC
	28	prpD RT R	TCGACGGTGGAAATCTTGTG
	29	prpC RT F	GTTCGAGCAGTCGATGATCC
	30	prpC RT R	GCGCTGTAGATGTCGGATTG
	31	vapB35 RT F	CGAATAATCCCGGCTTCTGC
	32	vapB35 RT R	TCCAACAGCGTTCCCGAGTC
	33	mbtC RT F	TGAACTCCGATGGACTTAGC
	34	mbtC RT R	CCTTCGACCATCCCGACATC
	35	fadD9 RT F	TTCCACGCGACTTCATCATC
	36	fadD9 RT R	GCTCGAGACGTTCGCCATAG
	37	leuD RT F	CGCTCATGGACTACGGATTC
	38	leuD RT R	ACATCGTCTTGGGCAACCTC
	39	leuC RT F	GAAGGCCGGATGACGATCTG
	40	leuC RT R	GACCACGCAAGAACGCGTAG
	41	desA3 RT F	GCGTGAATTCTCAGCCAAAG
	42	desA3 RT R	GGTCAAAGTGGACCGATACG
	43	katG RT F	GGTAAGGACGCGATCACCAG
	44	katG RT R	CTCTTCGTCAGCTCCCACTC
	45	trxC RT F	CGCCCGTTCTCGAGGAAATC
	46	trxC RT R	TCGAGACGACCTGGAAGTTG
	47	rv0158 RT F	GAAGCGCTGTACCAGTACAC
	48	rv0158 RT F	CGTAGACTTGCTGCTCCTTC
	49	rv0158 1kb UP F	GCTTACTAGTGATCGTGGCCGGCATGATCGTC
	50	rv0158 1kb UP R	GCCGATTTAAATGTGTCGGATGGCATCGCTACTC
	51	rv0158 1kb DN F	GCCGTTAATTAAGTCTCCGCTTGGAACTCGGAAG
	52	rv0158 1kb DN R	GGCTATGCATGCCGTTTATCGGGAACCTGTCAC
	53	TM4 Scaffold F	ATGGCAGAACAAACTGAG
	54	TM4 Scaffold R	GAATTGGTGTTGCCGTTG
	55	ppsD RT F	ACCTTCCCGACCGACATCTG
	56	ppsD RT R	CCGAAGGATCGGGATCGTAG
	57	ppsE RT F	AGGATGTTTCGGCGTTCTGG
	58	ppsE RT R	AACTCGTCGATCCCGTCAAG
	59	drrA RT F	AGATTGTGGCCCTCGATGAC
	60	drrA RT R	GCCGGTTCGGAAACAACATC
	61	drrC RT F	ACCGGTTGCTAACTCGATGG
	62	drrC RT R	TGCGATCAGCGGAACAATGC
	63	papA5 RT F	CGCTGTCAATGGAGGCTGTG
	64	papA5 RT R	TCGGTGGCAGGGATCTCATAG
	65	prpR RT F	ATGTCTTACCGGTGGCTAGG
	66	prpR RT R	CGCTGGTCATTCTCCAACTG
	67	fadB2 RT F	ACGCAACCGCATCGTGAAGTC
	68	fadB2 RT R	AACGGCCTCGATCACCAGTTG
	69	Tn 3’ primer	AATGATACGGCGACCACCGAGATCTACACTCTGGGGTACGCGTAATACGACTCACTATAGGGTCTAGAGA
	70	Tn Sequencing primer	TAATACGACTCACTATAGGGTCTAGAGACCGGGGACTTATCAGC
	71	pet28a rv0158 FP	GGAACATATGCCATCCGACACCACACAAC
	72	pet28a rv0158 RP	CGATGAATTCCTCGCGTGAGGTTCACGTTTCC
