# Supplementary figures and images for: Biosensor-integrated transposon mutagenesis reveals rv0158 as a coordinator of redox homeostasis in Mycobacterium tuberculosis
Source: eLife journal article supplement (doi:10.7554/elife.80218), 2023-08-29

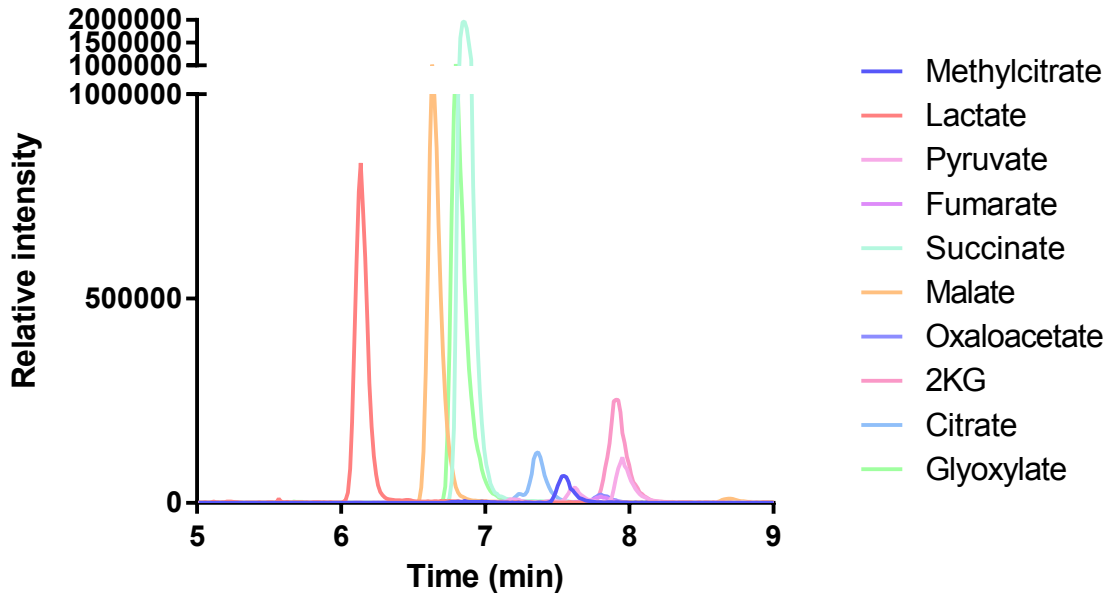

Supplement: supp [file elife-80218-supp-v1.zip]

# Oxaloacetate

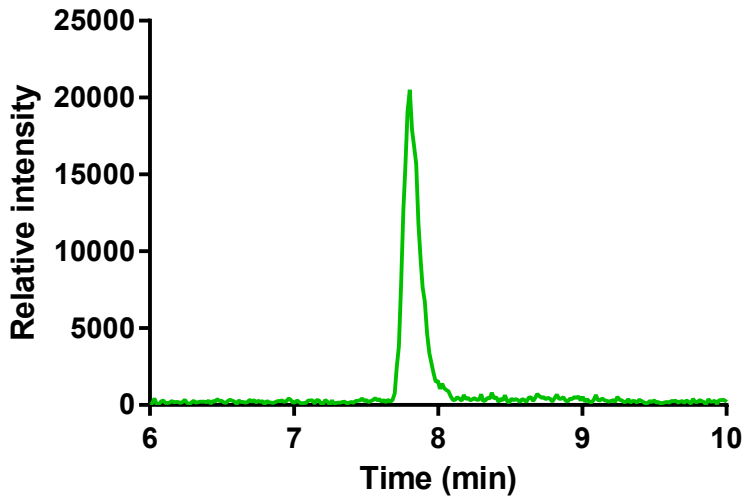

Supplement: supp [file elife-80218-supp-v1.zip]

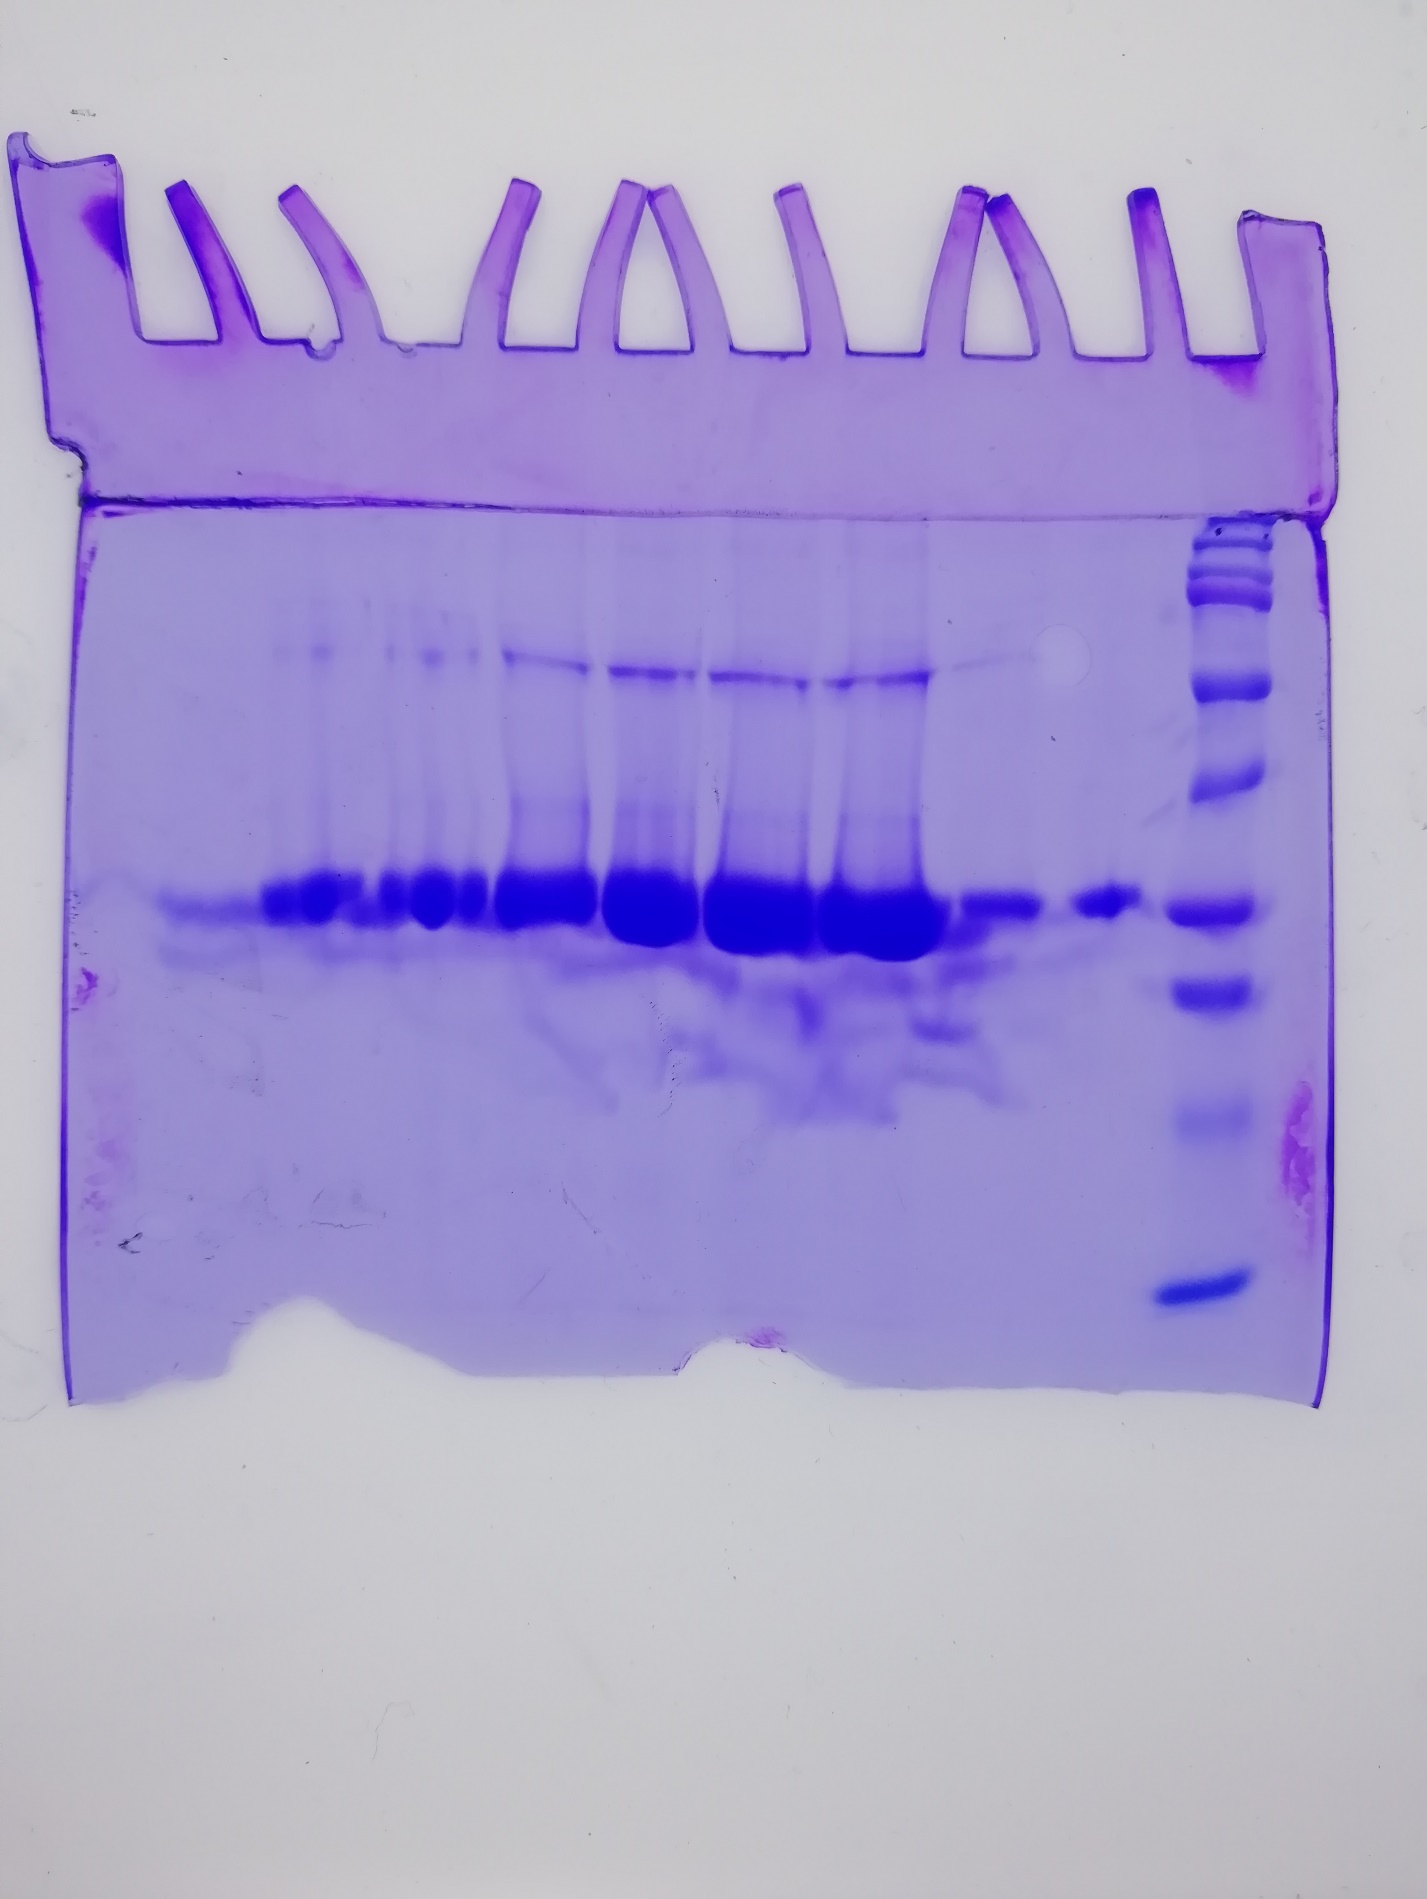


Peak 2 Marker

27 KDa

25 KDa

Supplement: supp [file Figure 10-figure supplement 1b-Source Data 1b labelled.docx]

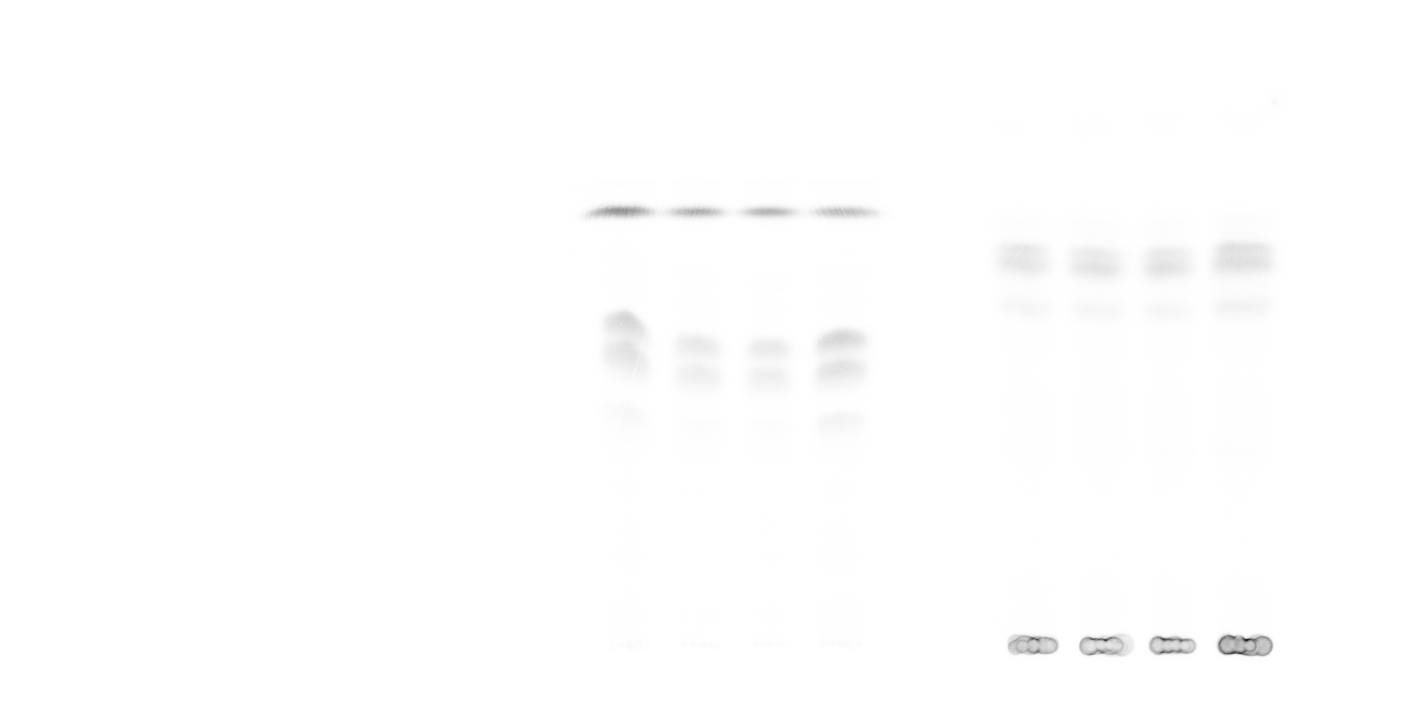


methoxy

MAMES

keto

α

*Rv0158* Comp

*Rv0158* KO

*WT Mtb*

Supplement: supp [file Figure 6A-Source Data 6A labelled.docx]

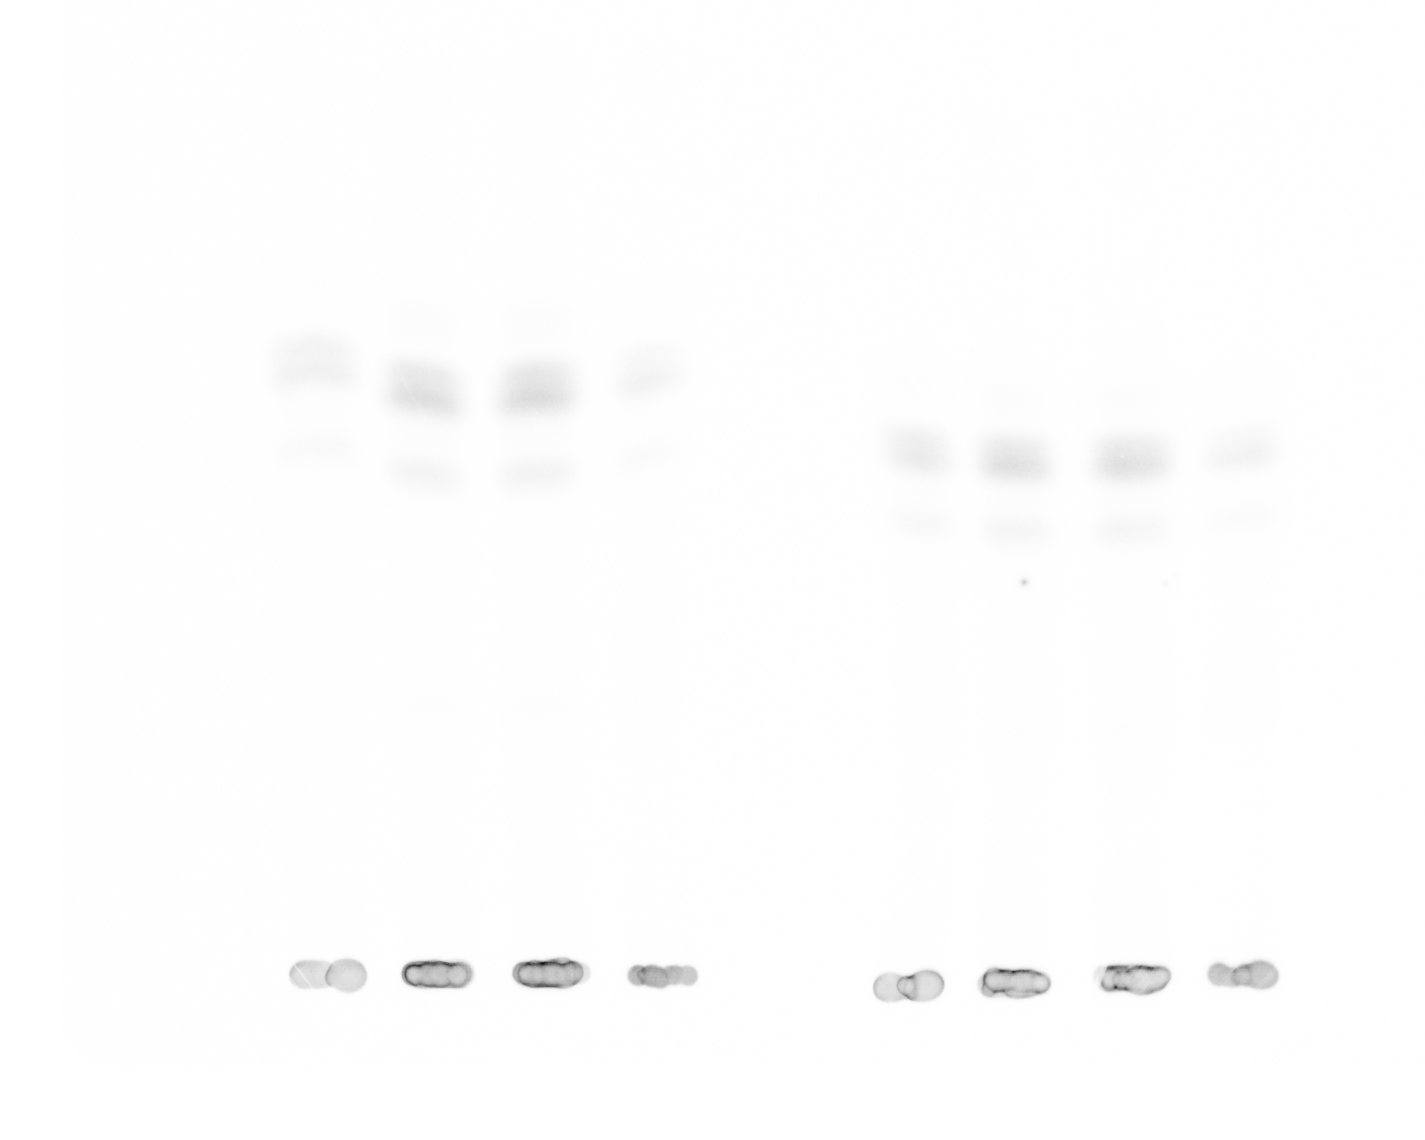


*Rv0158* Comp

*Rv0158* KO

*WT Mtb*

FAMES

Supplement: supp [file Figure 6B-Source Data 6B labelled.docx]
